# Supplementary material
Source: PubMed Central journal article supplement (PMC5699471)

## Table of Contents

|                                                                                        |      |
|----------------------------------------------------------------------------------------|------|
| <b>General Information</b> .....                                                       | S-3  |
| <b>Experimental Procedures</b> .....                                                   | S-4  |
| I. Representative Procedures for Preparation of <i>geminal</i> -Diboronate Esters..... | S-4  |
| II. Full Characterization of <i>geminal</i> -Diboronate Esters . .....                 | S-7  |
| III. Representative Procedure for Deborylative Cyclization .....                       | S-15 |
| IV. Full Optimization Table .....                                                      | S-16 |
| V. Full Characterization of Reaction Products and Proof of Stereochemistry .....       | S-17 |
| VI. Total Synthesis of Natural Product Aphanamal.....                                  | S-33 |
| VII. Mechanistic Studies .....                                                         | S-41 |
| 1. Mechanistic Studies to Differentiate between Anion and Radical Pathways I....       | S-41 |
| 2. Mechanistic Studies to Differentiate between Anion and Radical Pathways II ..       | S-46 |
| 3. <sup>2</sup> D-Labeled Alkene Experiment.....                                       | S-46 |
| 4. Analysis of Reaction Intermediates by <sup>13</sup> C-Labeled Experiments I. ....   | S-50 |
| 5. Analysis of Reaction Intermediates by <sup>13</sup> C-Labeled Experiments II.....   | S-53 |
| <b>X-ray Crystallographic Data</b> .....                                               | S-58 |
| <b>References (Experimental)</b> .....                                                 | S-79 |
| <b>Computational Studies</b> .....                                                     | S-80 |
| <b>Spectral Data</b> .....                                                             | S-92 |

## General Information

$^1\text{H}$  NMR spectra were recorded on a Varian Gemini-500 (500 MHz), or a Varian Inova-500 (500 MHz), or a Varian Inova-600 (600 MHz) spectrometer. Chemical shifts are reported in ppm with the solvent resonance as the internal standard ( $\text{CDCl}_3$ : 7.26 ppm,  $\text{THF-}d_8$ : 3.58 ppm). Data are reported as follows: chemical shift, integration, multiplicity (s = singlet, d = doublet, t = triplet, q = quartet, qi = quintet, sx = sextet, sp = septet, m = multiplet, br = broad), and coupling constants (Hz).  $^{13}\text{C}$  NMR spectra were recorded on a Varian Gemini-500 (125 MHz), or a Varian Inova-500 (125 MHz), or a Varian Inova-600 (150 MHz) spectrometer with complete proton decoupling. Chemical shifts are reported in ppm with the solvent resonance as the internal standard ( $\text{CDCl}_3$ : 77.0 ppm,  $\text{THF-}d_8$ : 67.57 ppm). Infrared (IR) spectra were recorded on a Bruker alpha-P Spectrometer. Frequencies are reported in wavenumbers ( $\text{cm}^{-1}$ ) as follows: strong (s), broad (br), medium (m), and weak (w). High-resolution mass spectrometry (DART+) was performed at the Mass Spectrometry Facility, Boston College, Chestnut Hill, MA.

Liquid chromatography was performed using forced flow (flash chromatography) on silica gel ( $\text{SiO}_2$ , 230 – 400 Mesh) purchased from Silicycle. Thin layer chromatography (TLC) was performed on 25  $\mu\text{m}$  silica gel glass backed plates from Silicycle. Visualization was performed using ultraviolet light (254 nm), phosphomolybdic acid (PMA) in ethanol and ceric ammonium molybdate (CAM) in ethanol.

Analytical chiral supercritical fluid chromatography (SFC) was performed on a TharSFC Method Station II equipped with Waters 2998 Photodiode Array Detector.

All reactions were conducted in oven- or flame-dried glassware under an inert atmosphere of nitrogen or argon. Tetrahydrofuran (THF), diethyl ether, dichloromethane and toluene were purified using Pure Solv MD-4 solvent purification system, from Innovative Technology, Inc., by passing the solvent through two activated alumina columns after being purged with argon.

Bis(pinacolato)diboron was purchased from Frontier Scientific and used without further purification. Triethylamine was purchased from Alfa Aesar and distilled over calcium hydride prior to use. The following reagents were purchased and used without purification: copper(I) iodide ( $\text{CuI}$ ) (Strem), lithium 2,2,6,6-tetramethylpiperidide (LTMP) (Aldrich), potassium *tert*-butoxide ( $\text{KO}t\text{-Bu}$ ) (Aldrich, sublimed grade), palmitic acid- $1\text{-}^{13}\text{C}$  (Cambridge Isotope Laboratories), and *N,N*-dimethylformamide (DMF) (Acros). All other reagents were purchased from either Aldrich, Alfa Aesar or Acros and used without further purification.

## Experimental Procedures

### I. Representative Procedures for Preparation of geminal-Diboronate Esters

#### Method A:

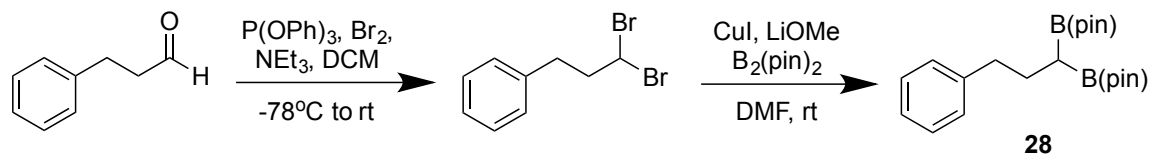

The 1,1-dibromide was prepared according to the literature procedure with modification.<sup>1</sup> To a stirred solution of triphenyl phosphite (8.53 g, 27.5 mmol) in anhydrous DCM (250 mL) at  $-78^{\circ}\text{C}$  under  $\text{N}_2$  was added bromine (1.41 mL, 27.5 mmol) dropwise. Freshly distilled triethylamine (10.45 mL, 75.0 mmol) and hydrocinnamaldehyde (3.29 mL, 25.0 mmol) were added at  $-78^{\circ}\text{C}$ . The reaction mixture was allowed to warm to room temperature and stirred for 2 hours. Upon completion, the solvent was evaporated *in vacuo* and the crude reaction mixture was purified on silica gel (100% hexanes) to afford the 1,1-dibromide.

In the glove box, an oven-dried 100 mL round-bottom flask with magnetic stir bar was charged with CuI (190 mg, 1.00 mmol), LiOMe (949 mg, 25.0 mmol) and  $\text{B}_2(\text{pin})_2$  (5.08 g, 20.0 mmol). The flask was sealed with a rubber septum, removed from the glove box, followed by the addition of DMF (20 mL) under  $\text{N}_2$ . After stirring at room temperature for 10 min, a solution of 1,1-dibromide (2.92 g, 10.5 mmol) in DMF (5 mL) was added *via* syringe at room temperature. The reaction mixture was allowed to stir at room temperature for 12 hours. Upon completion, 40 mL diethyl ether was added. The slurry was filtered through a silica gel plug, rinsed with diethyl ether, and concentrated *in vacuo*. The crude reaction mixture (DMF solution) was directly purified on silica gel (hexanes: diethyl ether = 10:1) to afford **28** as a white solid (3.09 g, 83%).

#### Method B:

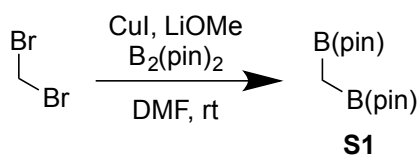

In the glove box, an oven-dried 500 mL round-bottom flask with magnetic stir bar was charged with CuI (1.428 g, 7.500 mmol), LiOMe (8.543 g, 225 mmol) and  $\text{B}_2(\text{pin})_2$  (38.09 g, 150.0 mmol). The flask was sealed with a rubber septum, removed from the glove box, followed by the addition of DMF (150 mL) under  $\text{N}_2$ . After stirring at room temperature for 10 min, dibromomethane (10.53 mL, 150.0 mmol) was added *via* syringe at room temperature. The reaction mixture was allowed to stir at room temperature for 12 hours. Upon completion, 200 mL diethyl ether was added. The slurry was filtered through a silica gel plug, rinsed with diethyl

<sup>1</sup> Spaggiari, A.; Vaccari, D.; Davoli, P.; Torre, G.; Prati, F. *J. Org. Chem.* **2007**, *72*, 2216.

ether, and concentrated *in vacuo*. The crude reaction mixture in DMF was diluted with hexanes (300 mL), washed with H<sub>2</sub>O (75 mL × 4), dried over Na<sub>2</sub>SO<sub>4</sub>, then concentrated *in vacuo* to afford **S1** as a white solid (15.72 g, 78%) and used without further purification.

**Method C:**

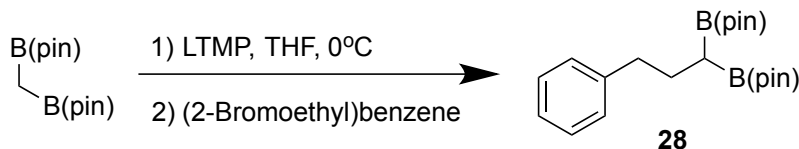

In the glove box, an oven-dried 25 mL round-bottom flask with magnetic stir bar was charged with LTMP (773 mg, 5.25 mmol). The flask was sealed with a rubber septum, removed from the glove box, followed by the addition of THF (20 mL) under N<sub>2</sub>. The reaction mixture was cooled to 0 °C, and a solution of 1,1-diborylmethane (1.34 g, 5.00 mmol) in THF (5 mL) was added *via* syringe and the mixture was allowed to stir at 0 °C for 10 minutes. (2-Bromoethyl)benzene (751 μL, 5.50 mmol) was added dropwise and the reaction was allowed to stir at 0 °C for 15 min. Upon completion, the reaction mixture was warmed to room temperature, filtered through a silica gel plug, rinsed with diethyl ether, and concentrated *in vacuo*. The crude reaction mixture was purified on silica gel (hexanes: diethyl ether = 9:1) to afford **28** as a white solid (1.54 g, 83%).

**Method D:**

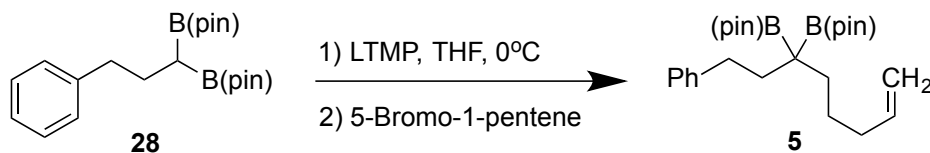

In the glove box, an oven-dried 2 dram vial with magnetic stir bar was charged with LTMP (147 mg, 1.0 mmol). The flask was sealed with a rubber septum, removed from the glove box, followed by the addition of THF (2 mL) under N<sub>2</sub>. The reaction mixture was cooled to 0 °C, and was transferred into a solution of 1,1-diboronate ester (372 mg, 1.00 mmol) in THF (2 mL) *via* syringe at 0 °C and the mixture was allowed to stir at 0 °C for 10 minutes. Then, 5-bromopent-1-ene (120 μL, 1.0 mmol) was added into the above mixture *via* syringe at 0 °C. The reaction mixture was allowed to stir at 0 °C for 15 min, then warmed to room temperature, filtered through a silica gel plug, rinsed with diethyl ether, and concentrated *in vacuo*. The crude reaction mixture was purified on silica gel (hexanes: diethyl ether = 20:1) to afford **5** as a white solid (360 mg, 84%).

**Method E:**

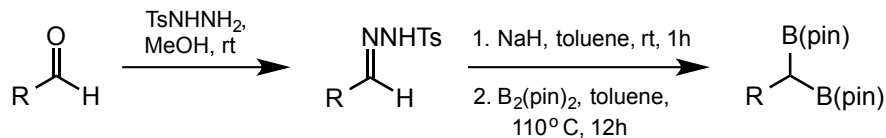

The 1,1-diboronates were prepared according to the literature procedure.<sup>3</sup> A 6-dram vial with magnetic stir bar was charged with aldehyde (1.00 equiv) and tosylhydrazine (1.00 equiv), and methanol (5 mL) was added. The mixture was stirred at room temperature.  $N$ -Tosylhydrazone precipitated after 15 minutes or longer and the reaction was monitored by TLC analysis (spot of the carbonyl compound). The precipitate was then collected, washed with pentane (5 mL  $\times$  3), and dried under vacuum.

In the glove box, an oven-dried 6-dram vial with a magnetic stir bar was charged with  $N$ -tosylhydrazone (1.00 mmol, 1.00 equiv),  $\text{NaH}$  (1.20 mmol, 1.20 equiv), and toluene (8 mL). The mixture was stirred at room temperature for 1 hour. Next,  $\text{B}_2(\text{pin})_2$  (1.20 mmol, 1.20 equiv) in toluene was added, and the vial was sealed, removed from the glove box and heated at  $110^\circ\text{C}$  for 12 hours. Upon completion, the reaction mixture was allowed to cooled to room temperature, and  $\text{Et}_2\text{O}$  (10 mL) and  $\text{H}_2\text{O}$  (10 mL) were added. The mixture was stirred vigorously for 10 minutes. After separation of the organic layer, the aqueous layer was extracted with  $\text{Et}_2\text{O}$  (2 $\times$ 5 mL). The combined organic layers were washed with saturated brine (10 mL) and dried over anhydrous  $\text{Na}_2\text{SO}_4$ . After the solvent was evaporated, the crude product was purified by silica gel chromatography.

## II. Full Characterization of geminal-Diboronate Esters

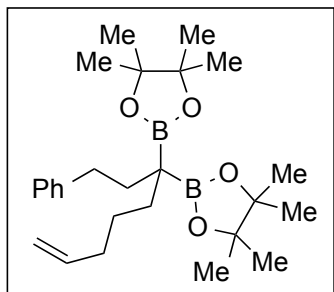

**2,2'-(1-phenyloct-7-ene-3,3-diyl)bis(4,4,5,5-tetramethyl-1,3,2-dioxaborolane) (5).** The reaction was performed according to *Representative Procedure (Method D)* with diboronate ester (372 mg, 1.0 mmol), LTMP (147 mg, 1.0 mmol), 5-bromo-1-pentene (120  $\mu$ L, 1.0 mmol) and THF (4 mL). The crude reaction mixture was purified by column chromatography on silica gel (20:1 hexanes/diethyl ether, stain in CAM) to afford a white solid (360 mg, 84%).  $^1\text{H NMR}$  (500 MHz,  $\text{CDCl}_3$ ):  $\delta$  7.26-7.23 (m, 2H), 7.20-7.19 (m, 2H), 7.15-7.12 (m, 1H), 5.86 (ddt,  $J = 17.1, 10.3, 6.9$  Hz, 1H), 5.01 (ddt,  $J = 17.1, 2.0, 1.5$  Hz, 1H), 4.93 (ddt,  $J = 10.3, 2.4, 1.0$  Hz, 1H), 2.52-2.49 (m, 2H), 2.10-2.06 (m, 2H), 1.91-1.88 (m, 2H), 1.74-1.71 (m, 2H), 1.41-1.35 (m, 2H), 1.23 (s, 24H); The  $^1\text{H NMR}$  spectrum was in accord with previously reported data.<sup>2</sup>

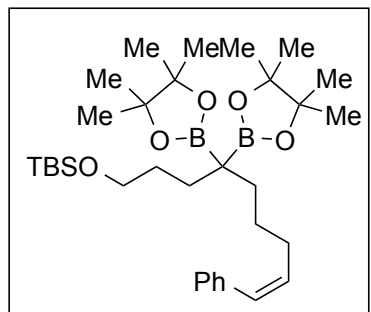

**(Z)-tert-butyl dimethyl((9-phenyl-4,4-bis(4,4,5,5-tetramethyl-1,3,2-dioxaborolan-2-yl)non-8-en-1-yl)oxy)silane (S2).** Prepared according to *Representative Procedure (Method D)* with LTMP (177 mg, 1.0 mmol), diboronate ester **S5** (412 mg, 1.0 mmol), (3-bromopropoxy)-tert-butyl dimethylsilane (253 mg, 1.0 mmol), and THF (5 mL). The crude reaction mixture was purified on silica gel (hexanes: ethyl acetate = 50:1) to afford the desired product as a white solid (455 mg, 77%).  $^1\text{H NMR}$  (600 MHz,  $\text{CDCl}_3$ ):  $\delta$  7.33 – 7.22 (m, 4H), 7.21 – 7.16 (m, 1H),  $\delta$  6.36 (d,  $J = 11.7$  Hz, 1H), 5.68 (dt,  $J = 11.6, 7.3$  Hz, 1H), 3.58 (t,  $J = 7.2$  Hz, 2H), 2.31 (dt,  $J = 8.4, 6.5$  Hz, 2H), 1.70 – 1.62 (m, 2H), 1.60 – 1.55 (m, 2H), 1.51 – 1.44 (m, 2H), 1.39 – 1.34 (m, 2H), 1.21 (s, 24H), 0.88 (s, 9H), 0.03 (s, 6H);  $^{13}\text{C NMR}$  (150 MHz,  $\text{CDCl}_3$ )  $\delta$  137.84, 133.44, 128.73, 128.38, 128.02, 126.27, 82.92, 64.32, 30.63, 29.56, 28.95, 27.60, 26.01, 24.74, 24.70, 18.40, -5.18;  $\text{IR}$  (neat): 2977.1 (m), 2929.4 (m), 2857.6 (w), 1461.6 (w), 1378.15 (m), 1371.8 (m), 1355.5 (m), 1307.2 (m), 1139.6 (s), 973.4 (w), 853.3 (m), 853.8 (m), 774.4 (w)  $\text{cm}^{-1}$ ;  $\text{HRMS}$ -(DART+) for  $^{12}\text{C}_{33}\text{H}_{59}\text{B}_2\text{O}_5\text{Si}_1$   $[\text{M}+\text{H}]^+$ : calculated: 585.4318, found: 585.4309.

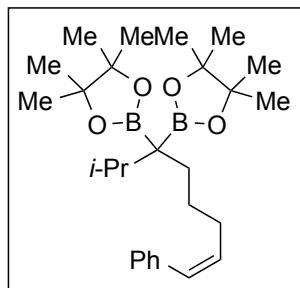

**(Z)-2,2'-(2-methyl-8-phenyloct-7-ene-3,3-diyl)bis(4,4,5,5-tetramethyl-1,3,2-dioxaborolane) (S3).** The reaction was performed according to *Representative Procedure (Method D)* with 2,2'-(2-methylpropane-1,1-diyl)bis(4,4,5,5-tetramethyl-1,3,2-dioxaborolane) (509 mg, 1.6 mmol, made according to previous procedure<sup>3</sup>), LTMP (236 mg, 1.60 mmol),

<sup>2</sup> K. Hong, X. Liu, and J. P. Morken *J. Am. Chem. Soc.* **2014**, *136*, 10581.

<sup>3</sup> Li, H.; Shangguan, X.; Zhang, Z.; Huang, S.; Zhang, Y.; Wang, J. *Org. Lett.* **2014**, *16*, 448.

(*Z*)-(5-bromopent-1-en-1-yl)benzene (361 mg, 1.60 mmol) and THF (8 mL). The crude reaction mixture was purified by column chromatography on silica gel (100:1 – 50:1 hexanes/ethyl acetate, stain in CAM) to afford a white solid (530 mg, 83%).  $^1\text{H NMR}$  (500 MHz,  $\text{CDCl}_3$ ):  $\delta$  7.37 – 7.25 (m, 4H), 7.19 (m, 1H), 6.36 (d,  $J = 11.7$ , 1H), 5.71 (dt,  $J = 11.6$ , 7.2 Hz, 1H), 2.31 (qd,  $J = 7.4$ , 1.8 Hz, 2H), 2.04 (p,  $J = 6.8$  Hz, 1H), 1.68 – 1.59 (m, 2H), 1.59 – 1.45 (m, 2H), 1.21 (s, 24H), 0.98 (d,  $J = 6.8$  Hz, 6H).  $^{13}\text{C NMR}$  (125 MHz,  $\text{CDCl}_3$ ):  $\delta$  137.94, 133.70, 128.76, 128.24, 128.01, 126.24, 82.56, 30.04, 29.75, 29.21, 28.42, 24.81, 24.77, 21.29;  $\text{IR}$  (neat): 2976.8 (m), 2929.6 (m), 1728.5 (w), 1459.8 (w), 1378.0 (m), 1370.6 (m), 1296.1 (s), 1264.8 (m), 1215.1 (w), 1140.7 (s), 972.8 (w), 854.0 (w), 757.8 (s), 699.5 (w)  $\text{cm}^{-1}$ ;  $\text{HRMS}$ -(DART+) for  $^{12}\text{C}_{27}\text{H}_{45}^{11}\text{B}_2^{16}\text{O}_4$   $[\text{M}+\text{H}]^+$ : calculated: 455.3504, found: 455.3504.

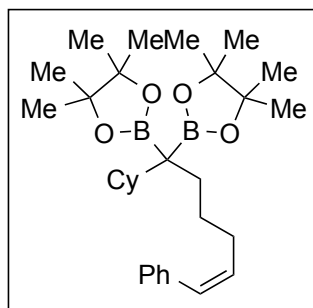

**(*Z*)-2,2'-(1-cyclohexyl-6-phenylhex-5-ene-1,1-diyl)bis(4,4,5,5-tetramethyl-1,3,2-dioxaborolane) (S4).** The reaction was performed according to *Representative Procedure (Method D)* with 2,2'-(cyclohexylmethylene)bis(4,4,5,5-tetramethyl-1,3,2-dioxaborolane) (350 mg, 1.0 mmol; made according to previously reported procedure<sup>4</sup>), LTMP (147 mg, 1.0 mmol), (*Z*)-(5-bromopent-1-en-1-yl)benzene (225 mg, 1.60 mmol) and THF (5 mL). The crude reaction mixture was purified by column

chromatography on silica gel (100:1 – 50:1 hexanes/ethyl acetate, stain in CAM) to afford a colorless oil (378 mg, 76%).  $^1\text{H NMR}$  (500 MHz,  $\text{CDCl}_3$ ):  $\delta$  7.37 – 7.28 (m, 4H), 7.31 – 7.15 (m, 1H), 6.37 (d,  $J = 11.6$ , 1H), 5.72 (dt,  $J = 11.6$ , 7.2 Hz, 1H), 2.30 (qd,  $J = 7.4$ , 1.8 Hz, 2H), 1.80 – 1.73 (m, 2H), 1.73 – 1.58 (m, 6H), 1.57 – 1.46 (m, 2H), 1.21 (s, 24H), 1.31 – 1.02 (m, 4H), 0.91 – 0.82 (m, 1H).  $^{13}\text{C NMR}$  (125 MHz,  $\text{CDCl}_3$ ):  $\delta$  137.97, 133.80, 128.77, 128.20, 128.02, 126.24, 82.57, 40.24, 31.53, 30.13, 29.41, 28.66, 27.42, 26.96, 24.82, 24.80;  $\text{IR}$  (neat): 2977.4 (m), 2925.9 (m), 2851.9 (w), 1447.1 (w), 1377.5 (m), 1370.6 (m), 1344.1 (m), 1293.8 (m), 1137.7 (s), 974.0 (w), 850.9 (w), 699.5 (w)  $\text{cm}^{-1}$ ;  $\text{HRMS}$ -(DART+) for  $^{12}\text{C}_{30}\text{H}_{49}^{11}\text{B}_2^{16}\text{O}_4$   $[\text{M}+\text{H}]^+$ : calculated: 495.3817, found: 495.3819.

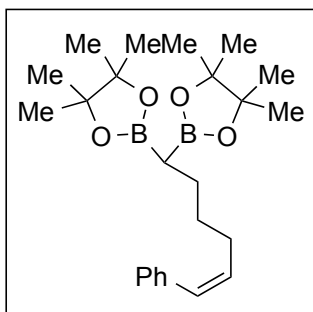

**(*Z*)-2,2'-(6-phenylhex-5-ene-1,1-diyl)bis(4,4,5,5-tetramethyl-1,3,2-dioxaborolane) (S5).** The reaction was performed according to *Representative Procedure (Method D)* with methyl diboronate ester (429 mg, 1.60 mmol), LTMP (236 mg, 1.60 mmol), (*Z*)-(5-bromopent-1-en-1-yl)benzene (361 mg, 1.60 mmol) and THF (8 mL). The crude reaction mixture was purified by column chromatography on silica gel (50:1 – 20:1 hexanes/ethyl acetate, stain in CAM) to afford a white solid (500 mg, 76%).  $^1\text{H NMR}$

(500 MHz,  $\text{CDCl}_3$ ):  $\delta$  7.36 – 7.22 (m, 4H), 7.22 – 7.17 (m, 1H), 6.37 (d,  $J = 11.7$  Hz, 1H), 5.67 (dt,  $J = 11.6$ , 7.3 Hz, 1H), 2.31 (qd,  $J = 7.5$ , 1.9 Hz, 2H), 1.60 (q,  $J = 7.8$  Hz, 2H), 1.50 – 1.40 (m,

<sup>4</sup> K. Hong, X. Liu, and J. P. Morken *J. Am. Chem. Soc.* **2014**, *136*, 10581.



2H), 1.22 (s, 12H), 1.21 (s, 12H), 0.74 (t,  $J = 7.8$  Hz, 1H);  $^{13}\text{C}$  NMR (100 MHz,  $\text{CDCl}_3$ ):  $\delta$  137.80, 133.28, 128.70, 128.43, 128.02, 126.27, 82.90, 32.88, 28.86, 25.57, 24.83, 24.48; IR (neat): 2976.8 (m), 2927.3 (w), 1368.7 (m), 1311.6 (s), 1267.5 (m), 1214.5 (w), 1139.3 (s), 969.4 (m), 849.7 (m), 699.8 (w)  $\text{cm}^{-1}$ ; HRMS-(DART+) for  $^{12}\text{C}_{24}^1\text{H}_{39}^{11}\text{B}_2^{16}\text{O}_4$   $[\text{M}+\text{H}]^+$ : calculated: 413.3034, found: 413.3052.

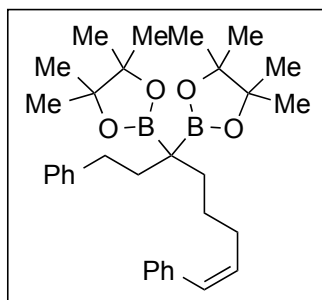

**(Z)-2,2'-(1,8-diphenyloct-7-ene-3,3-diyl)bis(4,4,5,5-tetramethyl-1,3,2-dioxaborolane) (37).** The reaction was performed according to *Representative Procedure (Method D)* with diboronate ester **30** (441 mg, 1.18 mmol), LTMP (174.5 mg, 1.18 mmol), (Z)-(5-bromopent-1-en-1-yl)benzene (267 mg, 1.186 mmol) and THF (6 mL). The crude reaction mixture was purified by column chromatography on silica gel (20:1 hexanes/ethyl acetate, stain in

CAM) to afford a white solid (543 mg, 89%).  $^1\text{H}$  NMR (500 MHz,  $\text{CDCl}_3$ ):  $\delta$  7.37 – 7.10 (m, 10H), 6.40 (d,  $J = 11.7$  Hz, 1H), 5.73 (dt,  $J = 11.6, 7.3$  Hz, 1H), 2.56 – 2.48 (m, 2H), 2.37 (qd,  $J = 7.4, 1.8$  Hz, 2H), 1.96 – 1.88 (m, 2H), 1.82 – 1.73 (m, 2H), 1.52 – 1.41 (m, 2H), 1.24 (two sets of singlet, 24H);  $^{13}\text{C}$  NMR (125 MHz,  $\text{CDCl}_3$ ):  $\delta$  143.72, 137.83, 133.38, 128.73, 128.53, 128.46, 128.08, 128.04, 126.32, 125.34, 82.98, 33.83, 31.92, 29.56, 28.95, 27.68, 24.78, 24.71; IR (neat): 2977.2 (m), 2928.4 (w), 1454.5 (w), 1370.5 (m), 1352.4 (m), 1308.8 (s), 1254.6 (m), 1214.1 (w), 1138.1 (s), 968.9 (w), 854.6 (w), 699.2 (m)  $\text{cm}^{-1}$ . HRMS-(DART+) for  $^{12}\text{C}_{32}^1\text{H}_{47}^{11}\text{B}_2^{16}\text{O}_4$   $[\text{M}+\text{H}]^+$ : calculated: 517.3660, found: 517.3639.

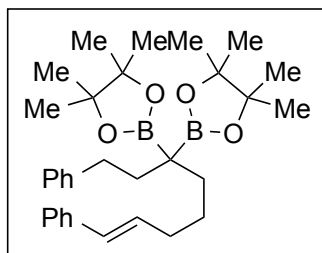

**(E)-2,2'-(1,8-diphenyloct-7-ene-3,3-diyl)bis(4,4,5,5-tetramethyl-1,3,2-dioxaborolane) (21).** The reaction was performed according to *Representative Procedure (Method D)* with diboronate ester **30** (1.0 g, 2.69 mmol), LTMP (417 mg, 2.83 mmol), (E)-(5-bromopent-1-en-1-yl)benzene (636 mg, 2.83 mmol) and THF (10.8 mL). The crude reaction mixture was purified by

column chromatography on silica gel (20:1 hexanes/ethyl acetate, stain in CAM) to afford a white solid (543 mg, 39%).  $^1\text{H}$  NMR (600 MHz,  $\text{CDCl}_3$ ):  $\delta$  7.36 (dd,  $J = 8.2, 1.4$  Hz, 2H), 7.32 – 7.22 (m, 4H), 7.23 – 7.17 (m, 3H), 7.20 – 7.11 (m, 1H), 6.40 (d,  $J = 15.7$  Hz, 1H), 6.28 (dt,  $J = 15.9, 6.7$  Hz, 1H), 2.56 – 2.49 (m, 2H), 2.25 (q,  $J = 6.9$  Hz, 2H), 1.95 – 1.89 (m, 2H), 1.81 – 1.75 (m, 2H), 1.52 – 1.43 (m, 2H), 1.24 (s, 24H);  $^{13}\text{C}$  NMR (150 MHz,  $\text{CDCl}_3$ ):  $\delta$  143.73, 138.07, 131.42, 129.48, 128.48, 128.40, 128.09, 126.62, 125.91, 125.35, 83.00, 33.86, 33.83, 31.91, 28.77, 27.10, 24.81, 24.71; IR (neat): 2977.5 (w), 2929.4 (w), 1453.7 (w), 1378.5 (m), 1307.6 (m), 1253.4 (m), 1138.4 (s), 967.5 (w), 851.2 (w), 751.4 (m), 698.1 (w)  $\text{cm}^{-1}$ . HRMS-(DART+) for  $^{12}\text{C}_{32}^1\text{H}_{47}^{11}\text{B}_2^{16}\text{O}_4$   $[\text{M}+\text{H}]^+$ : calculated: 517.3660, found: 517.3664.

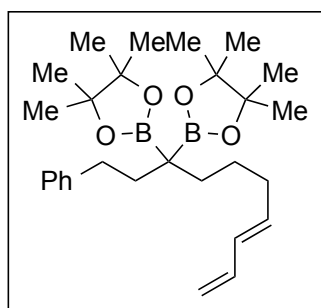

**(E)-2,2'-(1-phenyldeca-7,9-diene-3,3-diyl)bis(4,4,5,5-tetramethyl-1,3,2-dioxaborolane) (22).** The reaction was performed according to *Representative Procedure (Method D)* with diboronate ester **30** (633 mg, 1.7 mmol), LTMP (250 mg, 1.7 mmol), (*E*)-7-bromohepta-1,3-diene (296 mg, 1.7 mmol) and THF (7 mL). The crude reaction mixture was purified by column chromatography on silica gel (50:1 hexanes/ethyl acetate, stain in CAM) to afford a white solid (713 mg, 90%). <sup>1</sup>H NMR (600 MHz, CDCl<sub>3</sub>):

δ 7.28 – 7.10 (m, 5H), 6.32 (dt, *J* = 17.0, 10.3 Hz, 1H), 6.06 (dd, *J* = 15.3, 10.3 Hz, 1H), 5.75 (dt, *J* = 14.5, 6.8 Hz, 1H), 5.08 (dd, *J* = 17.0, 1.7 Hz, 1H), 4.94 (dd, *J* = 10.1, 1.7 Hz, 1H), 2.53 – 2.47 (m, 2H), 2.11 (q, *J* = 7.2 Hz, 2H), 1.92 – 1.86 (m, 2H), 1.75 – 1.69 (m, 2H), 1.42 – 1.34 (m, 2H), 1.23 (s, 24H); <sup>13</sup>C NMR (150 MHz, CDCl<sub>3</sub>): δ 143.74, 137.52, 135.85, 130.64, 128.48, 128.09, 125.35, 114.37, 82.99, 33.84, 33.34, 31.87, 28.76, 26.89, 24.80, 24.71; IR (neat): 2976.8 (w), 2929.1 (w), 1455.0 (w), 1378.0 (m), 1305.6 (m), 1252.2 (m), 1137.0 (s), 1003.9 (m), 852.2 (m), 699.2 (w) cm<sup>-1</sup>; HRMS-(DART+) for <sup>12</sup>C<sub>28</sub><sup>1</sup>H<sub>45</sub><sup>11</sup>B<sub>2</sub><sup>16</sup>O<sub>4</sub> [M+H]<sup>+</sup>: calculated: 467.3504, found: 467.3519.

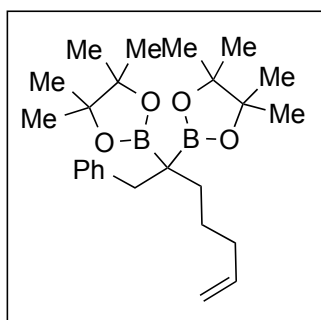

**2,2'-(1-phenylhept-6-ene-2,2-diyl)bis(4,4,5,5-tetramethyl-1,3,2-dioxaborolane) (S6).** The reaction was performed according to *Representative Procedure (Method D)* with 2,2'-(2-phenylethane-1,1-diyl)bis(4,4,5,5-tetramethyl-1,3,2-dioxaborolane) (429.7mg, 1.2 mmol, made according to previous procedure<sup>5</sup>), LTMP (194.3 mg, 1.32 mmol), 5-bromo-1-pentene (197 mg, 1.32 mmol) and THF (6 mL). The crude reaction mixture was purified by column chromatography on silica gel

(50:1 hexanes/ethyl acetate, stain in CAM) to afford a colorless oil (450 mg, 88%). <sup>1</sup>H NMR (500 MHz, CDCl<sub>3</sub>): δ 7.26 – 7.17 (m, 4H), 7.15 – 7.07 (m, 1H), 5.82 (ddt, *J* = 16.9, 10.2, 6.6 Hz, 1H), 4.97 (dq, *J* = 17.2, 1.8 Hz, 1H), 4.90 (ddt, *J* = 10.2, 2.4, 1.3 Hz, 1H), 2.97 (s, 2H), 2.00 (q, *J* = 7.1 Hz, 2H), 1.56 – 1.51 (m, 2H), 1.49 – 1.41 (m, 2H), 1.24 (s, 12H), 1.20 (s, 12H); <sup>13</sup>C NMR (125 MHz, CDCl<sub>3</sub>): δ 141.82, 139.32, 129.70, 127.65, 125.41, 113.82, 83.16, 34.58, 34.44, 28.45, 26.77, 25.00, 24.69; IR (neat): 2978.4 (m), 2931.7 (w), 2862.9 (m), 1378.4 (m), 1353.4 (m), 1261.8 (m), 1138.8 (s), 854.3 (w), 699.9 (w) cm<sup>-1</sup>; HRMS-(DART+) for <sup>12</sup>C<sub>25</sub><sup>1</sup>H<sub>41</sub><sup>11</sup>B<sub>2</sub><sup>16</sup>O<sub>4</sub> [M+H]<sup>+</sup>: calculated: 427.3191, found: 427.3189.

<sup>5</sup> K. Hong, X. Liu, and J. P. Morken *J. Am. Chem. Soc.* **2014**, *136*, 10581

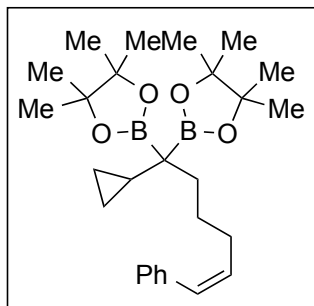

**(Z)-2,2'-(1-cyclopropyl-6-phenylhex-5-ene-1,1-diyl)bis(4,4,5,5-tetramethyl-1,3,2-dioxaborolane) (31).** The reaction was performed according to *Representative Procedure (Method D)* with 2,2'-(cyclopropylmethylene)bis(4,4,5,5-tetramethyl-1,3,2-dioxaborolane) (154 mg, 0.5 mmol, made according to previous procedure<sup>6</sup>), LTMP (77.3 mg, 0.53 mmol), (Z)-(5-bromopent-1-en-1-yl)benzene (118.2 mg, 0.53 mmol) and THF (2 mL). The crude reaction mixture was purified by column chromatography on silica gel (100:1 – 50:1 hexanes/ethyl acetate,

stain in CAM) to afford a white solid (226 mg, 86%). <sup>1</sup>H NMR (500 MHz, CDCl<sub>3</sub>) δ 7.42 – 7.24 (m, 4H), 7.25 – 7.17 (m, 1H), 6.38 (d, *J* = 11.7 Hz, 1H), 5.73 (dt, *J* = 11.5, 7.7 Hz, 1H), 2.35 (q, *J* = 7.0 Hz, 2H), 1.82 – 1.53 (m, 4H), 1.22 (s, 24H), 0.86 (tt, *J* = 8.1, 5.6 Hz, 1H), 0.49 – 0.28 (m, 4H); <sup>13</sup>C NMR (125 MHz, CDCl<sub>3</sub>): δ 137.92, 133.70, 128.76, 128.28, 128.02, 126.26, 82.76, 33.04, 29.80, 28.64, 24.72, 24.71, 12.93, 3.62; IR (neat): 2977.3 (m), 2931.1 (w), 1378.7 (m), 1342.2 (m), 1305.2 (s), 1268.1 (m), 1214.4 (w), 1137.5 (s), 853.5 (w), 699.2 (w) cm<sup>-1</sup>; HRMS-(DART+) for <sup>12</sup>C<sub>30</sub><sup>1</sup>H<sub>49</sub><sup>11</sup>B<sub>2</sub><sup>16</sup>O<sub>4</sub> [M+H]<sup>+</sup>: calculated: 495.3817, found: 495.3819.

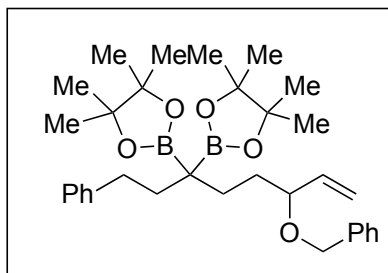

**2,2'-(6-(benzyloxy)-1-phenyloct-7-ene-3,3-diyl)bis(4,4,5,5-tetramethyl-1,3,2-dioxaborolane) (S7).** The reaction was performed according to *Representative Procedure (Method D)* with diboronate ester **28** (186 mg, 0.5 mmol), LTMP (73.6 mg, 0.5 mmol), 3-(benzyloxy)pent-4-en-1-yl 4-methylbenzenesulfonate (193 mg, 0.56 mmol) and THF (5 mL). The crude reaction mixture was purified by column chromatography on silica gel (100:2 – 100:4 hexanes/ethyl

acetate, stain in CAM) to afford a colorless oil (220 mg, 81%). <sup>1</sup>H NMR (500 MHz, CDCl<sub>3</sub>): δ 7.37 – 7.30 (m, 4H), 7.26 – 7.21 (m, 3H), 7.20 – 7.16 (m, 2H), 7.13 (t, *J* = 7.2 Hz, 1H), 5.84 – 5.69 (m, 1H), 5.25 – 5.22 (m, 2H), 4.60 (d, *J* = 12.1 Hz, 1H), 4.40 (d, *J* = 12.1 Hz, 1H), 3.73 (q, *J* = 6.8 Hz, 1H), 2.50 (td, *J* = 7.3, 3.7 Hz, 2H), 1.88 (dd, *J* = 10.7, 6.9 Hz, 2H), 1.80 – 1.63 (m, 3H), 1.59 – 1.50 (m, 1H), 1.22 (s, 24H); <sup>13</sup>C NMR (150 MHz, CDCl<sub>3</sub>): δ 143.76, 139.03, 128.51, 128.21, 128.07, 127.58, 127.20, 125.32, 117.22, 82.99, 81.33, 69.77, 33.79, 32.81, 31.96, 24.91, 24.78, 24.65; IR (neat): 2977.4 (m), 2932.1 (w), 1378.5 (w), 1370.5 (w), 1309.9 (s), 1138.56 (s), 851.8 (w), 698.5 (w) cm<sup>-1</sup>; HRMS-(DART+) for <sup>12</sup>C<sub>33</sub><sup>1</sup>H<sub>52</sub><sup>11</sup>B<sub>2</sub><sup>16</sup>O<sub>5</sub><sup>14</sup>N<sub>1</sub> [M+NH<sub>4</sub>]<sup>+</sup>: calculated: 564.4032, found: 564.4058.

The 3-(benzyloxy)pent-4-en-1-yl 4-methylbenzenesulfonate was prepared as shown in the scheme below:

<sup>6</sup> K. Hong, X. Liu, and J. P. Morken *J. Am. Chem. Soc.* **2014**, *136*, 10581

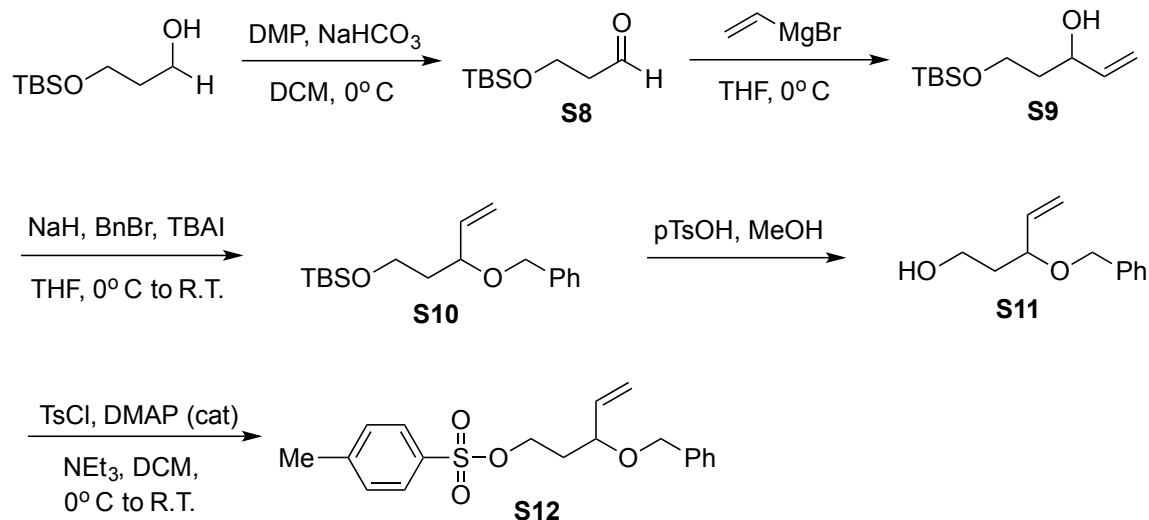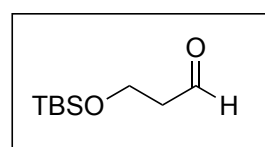

**3-((*tert*-butyldimethylsilyloxy)propanal (S8).** To an oven dried 20 mL vial, 3-((*tert*-butyldimethylsilyloxy)propan-1-ol (522 mg, 2.9 mmol) is added followed by anhydrous DCM (6 mL). The solution is brought to 0°C then Dess-Martin periodinane (1.48 g, 3.48 mmol) and NaHCO<sub>3</sub> (1.22 g, 14.5 mmol) added. The reaction is then allowed to stir for 4h, gradually reaching room temperature. At this point, the mixture is concentrated *in vacuo* then extracted with 1:1 hexane/Et<sub>2</sub>O and the combined extracts filtered through a pad of silica gel, rinsing with 1:1 hexane/Et<sub>2</sub>O. The filtrate is concentrated *in vacuo* and the resulting crude oil is purified by column chromatography on silica gel (80:20 pentane/diethyl ether, stain in PMA) to afford a clear colorless oil (380 mg, 69%). <sup>1</sup>H NMR (500 MHz, CDCl<sub>3</sub>): δ 9.80 (s, 1H), 3.98 (t, *J* = 6.0 Hz, 2H), 2.59 (td, *J* = 6.1, 2.0 Hz, 2H), 0.88 (s, 9H), 0.06 (s, 6H); <sup>13</sup>C NMR (125 MHz, CDCl<sub>3</sub>): δ 201.95, 57.38, 46.55, 25.78, 18.19, -5.47; IR (neat): 2868.7 (m), 1725.6 (w), 1256.2 (w), 1141.3 (s), 908.6 (s), 835.7 (s), 778.1 (m), 732.3 (s) cm<sup>-1</sup>; HRMS-(DART+) for <sup>12</sup>C<sub>9</sub><sup>1</sup>H<sub>21</sub><sup>28</sup>Si<sup>16</sup>O<sub>2</sub> [M+H]<sup>+</sup>: calculated: 189.1311, found: 189.1319.

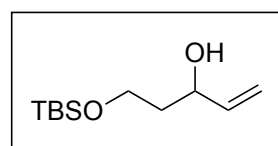

**5-((*tert*-butyldimethylsilyloxy)pent-1-en-3-ol (S9).** An oven-dried 125 mL round bottom flask fitted with magnetic stir bar is sealed and evacuated/refilled with N<sub>2</sub> 3x then charged with 3-((*tert*-butyldimethylsilyloxy)propanal (S8) (3.18 g, 16.9 mmol) followed by anhydrous THF (32 mL). The vessel and contents are then cooled to 0°C and vinylmagnesium bromide solution (33.8 mL, 1 M in THF, 33.8 mmol) added across ca. 15 min. The resulting clear, yellow solution is allowed to stir overnight at room temperature, then quenched with a saturated aqueous solution of ammonium chloride. The reaction mixture is then poured into a separatory funnel where it is diluted with DI water and the organics are extracted with diethyl ether 5x. The combined organics are dried over Na<sub>2</sub>SO<sub>4</sub> then concentrated *in vacuo*. The crude residue is then purified by column chromatography on silica gel (100:3 to 80:20 pentane/diethyl ether, stain in KMnO<sub>4</sub>) to afford a orange clear oil. (1566 mg,

43%).  $^1\text{H NMR}$  (500 MHz,  $\text{CDCl}_3$ ):  $\delta$  6.01 – 5.77 (m, 1H), 5.29 (dd,  $J = 17.2, 2.1$  Hz, 1H), 5.11 (dd,  $J = 10.5, 2.1$  Hz, 1H), 4.39 – 4.33 (m, 1H), 3.95 – 3.87 (m, 1H), 3.81 (ddt,  $J = 10.1, 7.3, 4.1$  Hz, 1H), 3.31 (d,  $J = 3.6$  Hz, 1H), 1.85 – 1.67 (m, 2H), 0.91 (s, 9H), 0.08 (s, 6H);  $^{13}\text{C NMR}$  (125 MHz,  $\text{CDCl}_3$ ):  $\delta$  140.51, 113.98, 72.32, 61.79, 38.15, 25.72, 18.00, -5.65;  $\text{IR}$  (neat): 3462.4(broad), 2954.5 (w), 2857.9 (w), 1255.4 (w), 1082.1 (w), 906.4 (s), 834.6 (s), 777.4 (m), 729.4 (s), 648.5 (m)  $\text{cm}^{-1}$ ;  $\text{HRMS}$ -(DART+) for  $^{12}\text{C}_{11}\text{H}_{25}^{28}\text{Si}_1^{16}\text{O}_2$   $[\text{M}+\text{H}]^+$ : calculated: 217.1624, found: 217.1632.

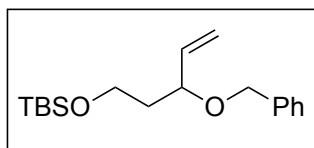

**((3-(benzyloxy)pent-4-en-1-yl)oxy)(tert-butyl)dimethylsilane**

**(S10)**. An oven-dried 20 mL vial is charged with sodium hydride (220 mg, 60 wt%, 5.5 mmol), and anhydrous THF (5 mL) then cooled to  $0^\circ\text{C}$ . A solution of 5-((tert-butyl dimethylsilyl)oxy) pent-1-en-3-ol (**S9**) (237 mg, 1.1 mmol) in anhydrous THF (2 mL) is then gradually added to the reaction vessel and the resulting mixture allowed to stir for 30 minutes at  $0^\circ\text{C}$ . Benzyl bromide (0.17 mL, 1.43 mmol) is then added followed by tetrabutylammonium iodide (122 mg, 0.33 mmol). The resulting light yellow slurry is allowed to stir overnight, gradually warming to room temperature. Upon return, the mixture is brought back to  $0^\circ\text{C}$  where it is quenched by a saturated aqueous solution of ammonium chloride. Organics are then extracted with diethyl ether 3x and combined organics dried over  $\text{Na}_2\text{SO}_4$ , and concentrated *in vacuo*. The crude reaction mixture was purified by column chromatography on silica gel (100:2 to 100:5 pentane/diethyl ether, stain in  $\text{KMnO}_4$ ) to afford a clear colorless oil (313 mg, 89%).  $^1\text{H NMR}$  (500 MHz,  $\text{CDCl}_3$ ):  $\delta$  7.28 – 7.23 (m, 3H), 7.22 – 7.16 (m, 2H), 5.73 – 5.64 (m, 1H), 5.21 – 5.12 (m, 2H), 4.52 (d,  $J = 11.7$  Hz, 1H), 4.28 (d,  $J = 11.6$  Hz, 1H), 3.93 – 3.83 (m, 1H), 3.67 (ddd,  $J = 10.1, 7.2, 5.8$  Hz, 1H), 3.63 – 3.58 (m, 1H), 1.80 (ddt,  $J = 13.7, 7.7, 5.9$  Hz, 1H), 1.69 – 1.58 (m, 1H), 0.81 (s, 9H), -0.04 (s, 6H);  $^{13}\text{C NMR}$  (125 MHz,  $\text{CDCl}_3$ ):  $\delta$  138.89, 128.27, 127.75, 127.68, 127.35, 116.98, 70.23, 59.31, 38.72, 25.91, 18.25, -5.35;  $\text{IR}$  (neat): 2953.7 (w), 2928.0 (w), 2856.4 (w), 1253.8 (m), 1090.6 (s), 925.3 (m), 834.8 (s), 775.2 (m), 733.2 (m), 696.7 (w)  $\text{cm}^{-1}$ ;  $\text{HRMS}$ -(DART+) for  $^{12}\text{C}_{18}\text{H}_{31}^{28}\text{Si}_1^{16}\text{O}_2$   $[\text{M}+\text{H}]^+$ : calculated: 307.2093, found: 307.2089.

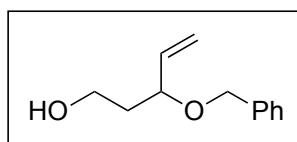

**3-(benzyloxy)pent-4-en-1-ol (S11)**. A 125 mL round bottom flask is charged with ((3-(benzyloxy)pent-4-en-1-yl)oxy)(tert-butyl) dimethylsilane (**S10**) (180 mg, 0.54 mmol), and THF (54 mL) then cooled to  $0^\circ\text{C}$  and HCl (0.54 mL, 1N, 0.54 mmol) slowly added. The resulting clear, colorless solution is then allowed to stir at  $4^\circ\text{C}$

overnight. Upon completion, the reaction is cooled to  $0^\circ\text{C}$  and slowly treated with saturated, aqueous  $\text{NaHCO}_3$  solution (0.54 mL). The mixture is then concentrated *in vacuo* and the crude residue purified by column chromatography on silica gel (100:3 to 80:20 pentane/diethyl ether, stain in  $\text{KMnO}_4$ ) to afford a clear colorless oil (101 mg, 86%).  $^1\text{H NMR}$  (500 MHz,  $\text{CDCl}_3$ ):  $\delta$  7.36 – 7.15 (m, 5H), 5.73 (ddd,  $J = 17.6, 10.5, 7.8$  Hz, 1H), 5.20 (d,  $J = 17.1$  Hz, 1H), 5.19 (d,  $J = 10.5$  Hz, 1H), 4.56 (d,  $J = 11.8$  Hz, 1H), 4.29 (d,  $J = 11.7$  Hz, 1H), 3.95 (td,  $J = 8.0, 4.4$  Hz, 1H),

3.79 – 3.61 (m, 2H), 2.31 (dd,  $J = 6.5, 4.4$  Hz, 1H), 1.81 (dtd,  $J = 15.3, 7.7, 4.2$  Hz, 1H), 1.73 (dtd,  $J = 10.5, 6.7, 4.1$  Hz, 1H);  $^{13}\text{C NMR}$  (125 MHz,  $\text{CDCl}_3$ ):  $\delta$  138.17, 138.10, 128.45, 127.79, 127.68, 117.51, 79.88, 70.29, 60.58, 37.79;  $\text{IR}$  (neat): 3383.2 (w, broad), 2865.8 (w), 1454.3(w), 1055.7 (s), 927.9 (m), 736.3 (m), 698.0 (m)  $\text{cm}^{-1}$ ;  $\text{HRMS}$ -(DART+) for  $^{12}\text{C}_{12}\text{H}_{17}\text{O}_2$   $[\text{M}+\text{H}]^+$ : calculated: 193.1229, found: 193.1229.

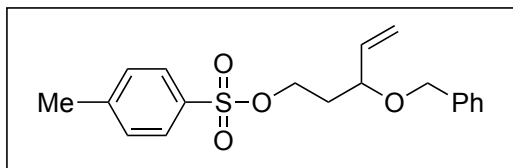

### 3-(benzyloxy)pent-4-en-1-yl

**4-methylbenzenesulfonate (S12).** An oven dried 20 mL vial equipped with magnetic stir bar is charged with 4-toluenesulfonyl chloride (203.4 mg, 1.07 mmol), DMAP (11.8 mg, 0.097 mmol),

DCM (2 mL), and reagent grade triethylamine (0.27 mL, 1.94 mmol) in succession. The vessel and contents are then cooled to  $0^\circ\text{C}$  and a solution of 3-(benzyloxy)pent-4-en-1-ol (**S11**) (187 mg, 0.97 mmol) in DCM (2 mL) is slowly added under nitrogen protection. The resulting clear-yellow solution is then allowed to stir overnight and upon return is quenched by DI  $\text{H}_2\text{O}$ . The organics are then extracted with DCM, and dried over  $\text{Na}_2\text{SO}_4$  and the combined organics concentrated *in vacuo*. The crude residue is then purified by column chromatography on silica gel (50:1 to 100:5 hexanes/ethyl acetate, stain in  $\text{KMnO}_4$ ) to afford a clear colorless oil (268 mg, 80%).  $^1\text{H NMR}$  (500 MHz,  $\text{CDCl}_3$ ):  $\delta$  7.81 – 7.75 (m, 2H), 7.35 – 7.29 (m, 2H), 7.29 – 7.27 (m, 1H), 7.24 – 7.21 (m, 2H), 5.67 (ddd,  $J = 17.1, 10.4, 7.7$  Hz, 1H), 5.25 – 5.19 (m, 2H), 4.51 (d,  $J = 11.5$  Hz, 1H), 4.27 – 4.17 (m, 2H), 4.10 (dt,  $J = 9.7, 5.6$  Hz, 1H), 3.87 (td,  $J = 8.0, 4.9$  Hz, 1H), 2.42 (s, 3H), 2.02 – 1.80 (m, 2H);  $^{13}\text{C NMR}$  (125 MHz,  $\text{CDCl}_3$ ):  $\delta$  144.68, 138.18, 137.61, 133.09, 129.79, 128.32, 127.90, 127.66, 127.55, 118.15, 76.47, 70.36, 67.15, 34.86, 21.60;  $\text{IR}$  (neat): 2927.4 (w), 2865.8 (w), 1598.2 (w), 1496.2 (w), 1454.5 (w), 1359.8 (m), 1176.5 (s), 916.0 (m), 836.7 (w), 739.9 (w), 664.0 (m), 554.5 (m)  $\text{cm}^{-1}$ ;  $\text{HRMS}$ -(DART+) for  $^{12}\text{C}_{19}\text{H}_{26}\text{N}_1\text{S}_1\text{O}_4$   $[\text{M}+\text{NH}_4]^+$ : calculated: 364.1583, found: 364.158.

### III. Representative Procedure for Deborylative Cyclization

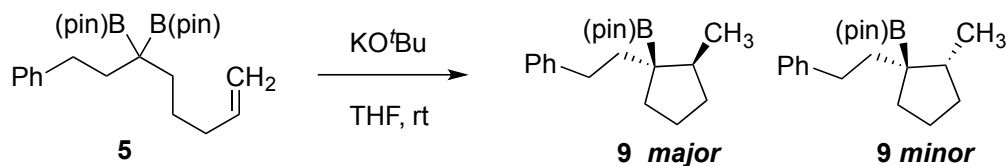

In the glove box, an oven-dried 2-dram vial equipped with magnetic stir bar is charged with 1,1-diboronate ester **5** (48.4 mg, 0.10 mmol), base (0.20 mmol) and THF (0.50 mL). The vial is sealed with a polypropylene cap, removed from the glove box, and allowed to stir at room temperature for overnight. Upon completion, the reaction mixture is diluted with wet diethyl ether (2 mL), filtered through a silica gel plug, rinsed with diethyl ether, and concentrated *in vacuo*. The crude reaction mixture is then purified on silica gel (hexanes: ethyl acetate = 100 : 0.8) to afford the desired product **9 major** and **9 minor**.

**IV. Table S1. Full Optimization<sup>a</sup>**

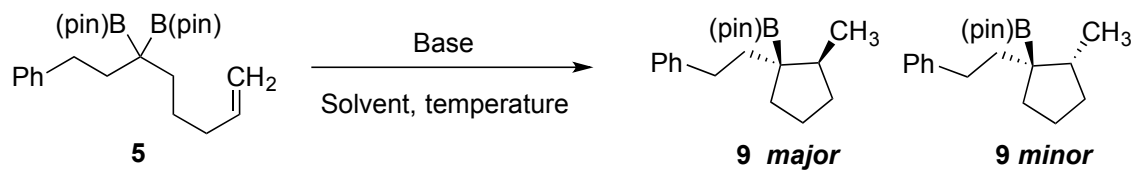

| entry | base             | solvent | yield (%) | d.r. ( <b>9 major</b> : <b>9 minor</b> ) |
|-------|------------------|---------|-----------|------------------------------------------|
| 1     | NaO <i>t</i> -Bu | THF     | 12        | 13 : 1                                   |
| 2     | NaO <i>t</i> -Bu | toluene | <5        | N/A                                      |
| 3     | KOMe             | toluene | <5        | N/A                                      |
| 4     | KO <i>t</i> -Bu  | DCE     | <5        | N/A                                      |
| 5     | KO <i>t</i> -Bu  | hexanes | 39        | 2.2 : 1                                  |
| 6     | KO <i>t</i> -Bu  | THF     | 51        | 5 : 1 <sup>b</sup>                       |
| 7     | KO <i>t</i> -Bu  | THF     | 52        | 4 : 1                                    |
| 8     | KO <i>t</i> -Bu  | toluene | 52        | 2 : 1 <sup>b</sup>                       |
| 9     | KO <i>t</i> -Bu  | toluene | 61        | 1.2 : 1                                  |

<sup>a</sup> Reaction conditions: 1,1-diboronate ester (0.10 mmol, 0.2 M), and base (0.20 mmol). Yield refers to the isolated yield of purified material. Diastereoselectivity was determined based on NMR integration. <sup>b</sup> Reaction conducted at 50 °C.



## V. Full Characterization of Reaction Products and Proof of Stereochemistry

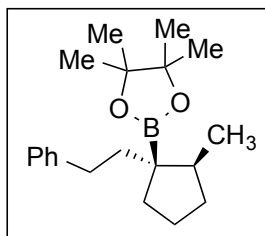

**4,4,5,5-tetramethyl-2-(2-methyl-1-phenethylcyclopentyl)-1,3,2-dioxaborolane (9, major diastereomer).** The reaction was performed according to *Representative Procedure for Deborylative Cyclization* with 1,1-diboronate ester **5** (88 mg, 0.2 mmol), KO*t*-Bu (44.8 mg, 0.4 mmol) and THF (1 mL). The crude reaction mixture was purified on silica gel (hexanes: ethyl acetate = 100 : 0.8) to afford the desired product as a colorless oil (32.7 mg, 52%, 4:1 dr). <sup>1</sup>H NMR (500 MHz, CDCl<sub>3</sub>): δ 7.28-7.25(m, 2H), 7.20 (d, *J* = 7.3 Hz, 2H), 7.16 (t, *J* = 7.3 Hz, 1H), 2.59-2.53 (m, 2H), 2.05-1.95 (m, 2H), 1.84-1.78 (m, 1H), 1.77-1.70 (m, 1H), 1.64-1.56 (m, 2H), 1.40-1.22 (m, 3H), 1.27 (12H, s, overlap), 1.00 (d, *J* = 6.9 Hz, 3H); The <sup>1</sup>H NMR spectrum was in accord with previously reported data.<sup>7</sup>

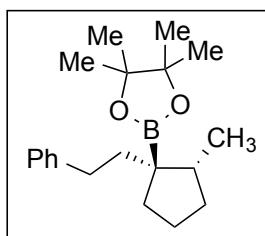

**4,4,5,5-tetramethyl-2-(1-phenyltetradecan-2-yl)-1,3,2-dioxaborolane (9, minor diastereomer).** <sup>1</sup>H NMR (500 MHz, CDCl<sub>3</sub>): δ 7.27 (t, *J* = 7.3 Hz, 2H), 7.21 (d, *J* = 7.3 Hz, 2H), 7.18-7.15 (m, 1H), 2.58-2.49 (m, 2H), 2.04 (sx, *J* = 7.3 Hz, 1H), 1.89-1.83 (m, 1H), 1.79-1.54 (m, 5H), 1.44-1.36 (m, 1H), 1.31-1.24 (m, 1H), 1.27 (s, overlap, 12H), 0.91 (dd, *J* = 7.3, 1.4 Hz, 3H); The <sup>1</sup>H NMR spectrum was in accord with previously reported data.<sup>8</sup>

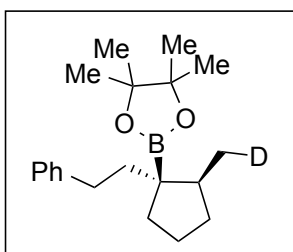

**4,4,5,5-tetramethyl-2-((1*R*,2*S*)-2-(methyl-*d*)-1-phenethylcyclopentyl)-1,3,2-dioxaborolane (10).** The reaction was performed according to *Representative Procedure for Deborylative Cyclization* with 1,1-diboronate ester **5** (88 mg, 0.2 mmol), KO*t*-Bu (44.8 mg, 0.4 mmol) and THF (1 mL). Upon completion, the reaction mixture was quenched with D<sub>2</sub>O (100 μL, 5.0 mmol), then diluted with diethyl ether (2 mL) and filtered through a silica gel plug, rinsing with diethyl ether, and concentrated *in vacuo*. The crude reaction mixture was purified on silica gel (hexanes: ethyl acetate = 100 : 0.8, stain in CAM) to afford the desired product as a colorless oil (28.1 mg, 45%, > 20:1 dr). <sup>1</sup>H NMR (500 MHz, CDCl<sub>3</sub>): δ 7.27 (t, *J* = 7.6 Hz, 2H), 7.23 – 7.14 (m, 3H), 2.63 – 2.50 (m, 2H), 2.07 – 1.92 (m, 2H), 1.86 – 1.68 (m, 2H), 1.63 – 1.55 (m, 2H), 1.39 – 1.20 (m, 3H), 1.27 (s, 12H), 0.99 (d, *J* = 7.0, 2H); <sup>13</sup>C NMR (125 MHz, CDCl<sub>3</sub>): δ 143.88, 128.30, 128.19, 125.40, 125.40, 82.89, 44.93, 41.24, 34.26, 34.19, 34.14, 25.28, 24.82, 22.70, 17.63, 17.50, 17.37; IR (neat): 2977.4 (m), 2931.9 (m), 2857.6 (w), 1730.2 (w), 1454.4 (w), 1387.8 (m), 1301.7 (m), 1195.1 (w), 1143.6 (s), 966.8 (w), 855.5 (w), 748.8 (w), 698.9 (w) cm<sup>-1</sup>; HRMS-(DART+) for <sup>12</sup>C<sub>20</sub><sup>1</sup>H<sub>31</sub><sup>2</sup>D<sub>1</sub><sup>11</sup>B<sub>1</sub><sup>16</sup>O<sub>2</sub> [M+H]<sup>+</sup>: calculated: 316.2558, found: 316.2560.

<sup>7</sup> K. Hong, X. Liu, and J. P. Morken *J. Am. Chem. Soc.* **2014**, *136*, 10581.

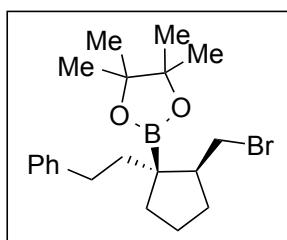

**2-((1R,2S)-2-(bromomethyl)-1-phenethylcyclopentyl)-4,4,5,5-tetramethyl-1,3,2-dioxaborolane (11).** The reaction was performed according to *Representative Procedure for Deborylative Cyclization n* with 1,1-diboronate ester **5** (88 mg, 0.2 mmol), KOt-Bu (44.8 mg, 0.4 mmol) and THF (1 mL). Upon completion, the reaction mixture was quenched with NBS (71.2 mg, 0.4 mmol) in anhydrous THF (1 mL), then diluted with diethyl ether (2 mL) and filtered through a silica gel plug, rinsing with diethyl ether. Filtrate was then concentrated *in vacuo* and crude purified on silica gel (hexanes: ethyl acetate = 100 : 0.8, stain in CAM) to afford the desired product as a white solid (40.3 mg, 51.2%, >20:1 dr).  $^1\text{H NMR}$  (500 MHz,  $\text{CDCl}_3$ ):  $\delta$  7.32 – 7.23 (m, 3H), 7.18 (dd,  $J = 7.7, 1.1$  Hz, 2H), 3.72 (dd,  $J = 9.6, 3.7$  Hz, 1H), 3.37 (dd,  $J = 11.4, 9.6$  Hz, 1H), 2.62 – 2.50 (m, 2H), 2.18 – 2.04 (m, 2H), 2.06 – 1.91 (m, 2H), 1.79 – 1.56 (m, 2H), 1.51 – 1.37 (m, 3H), 1.26 (d,  $J = 1.6$  Hz, 12H);  $^{13}\text{C NMR}$  (125 MHz,  $\text{CDCl}_3$ ):  $\delta$  143.13, 128.30, 128.23, 125.64, 83.31, 53.24, 41.18, 37.96, 35.71, 33.87, 32.22, 25.10, 24.82, 22.35;  $\text{IR}$  (neat): 2976.4 (m), 2956.2 (m), 2932.3 (m), 2868.7 (w), 1454.3 (w), 1381.0 (m), 1312.3 (m), 1210.3 (m), 1142.9 (s), 967.1 (w), 855.0 (w), 748.5 (w), 698.8 (m)  $\text{cm}^{-1}$ ;  $\text{HRMS}$ -(DART+) for  $^{12}\text{C}_{20}^{1}\text{H}_{31}^{11}\text{B}_1^{79}\text{Br}_1^{16}\text{O}_2$   $[\text{M}+\text{H}]^+$ : calculated: 393.1601, found: 393.1608.

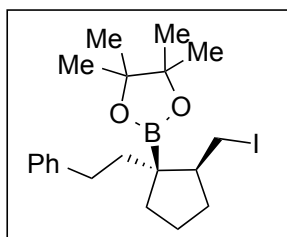

**2-((1R,2S)-2-(iodomethyl)-1-phenethylcyclopentyl)-4,4,5,5-tetramethyl-1,3,2-dioxaborolane (12).** The reaction was performed according to *Representative Procedure for Deborylative Cyclization n* with 1,1-diboronate ester **5** (88 mg, 0.2 mmol), KOt-Bu (44.8 mg, 0.4 mmol) and THF (1 mL). Upon completion, the reaction mixture was quenched with  $\text{I}_2$  (101.5 mg, 0.4 mmol) in anhydrous THF (1 mL), then diluted with diethyl ether (2 mL) and filtered through a silica gel plug, rinsing with diethyl ether. Filtrate was then concentrated *in vacuo* and the crude residue purified on silica gel (hexanes: ethyl acetate = 100 : 0.8, stain in CAM) to afford the desired product as a white solid (43mg, 49%, >20:1 dr, crude NMR shows the same diastereoselectivity).  $^1\text{H NMR}$  (600 MHz,  $\text{CDCl}_3$ ):  $\delta$  7.30 – 7.24 (m, 2H), 7.22 – 7.14 (m, 3H), 3.53 (dd,  $J = 9.4, 3.3$  Hz, 1H), 3.14 (dd,  $J = 12.1, 9.4$  Hz, 1H), 2.61 – 2.50 (m, 2H), 2.20 – 2.10 (m, 2H), 2.04 – 1.94 (m, 2H), 1.81 – 1.70 (m, 1H), 1.69 – 1.57 (m, 1H), 1.48 – 1.40 (m, 2H), 1.43 – 1.32 (m, 1H), 1.26 (s, 6H), 1.26 (s, 6H);  $^{13}\text{C NMR}$  (125 MHz,  $\text{CDCl}_3$ ):  $\delta$  143.13, 128.30, 128.22, 125.64, 83.30, 53.97, 41.19, 36.08, 33.90, 25.11, 24.82, 21.83, 11.61;  $\text{IR}$  (neat): 2976.5 (m), 2956.3 (m), 2932.3 (m), 2867.2 (w), 1454.1 (w), 1380.7 (m), 1345.3 (m), 1210.3 (w), 1142.4 (s), 966.8 (w), 854.2 (w), 755.1 (m), 698.4 (m)  $\text{cm}^{-1}$ ;  $\text{HRMS}$ -(DART+) for  $^{12}\text{C}_{20}^{1}\text{H}_{31}^{11}\text{B}_1^{127}\text{I}_1^{16}\text{O}_2$   $[\text{M}+\text{H}]^+$ : calculated: 441.1462, found: 441.1478. The relative stereochemistry was assigned by X-ray crystallography.

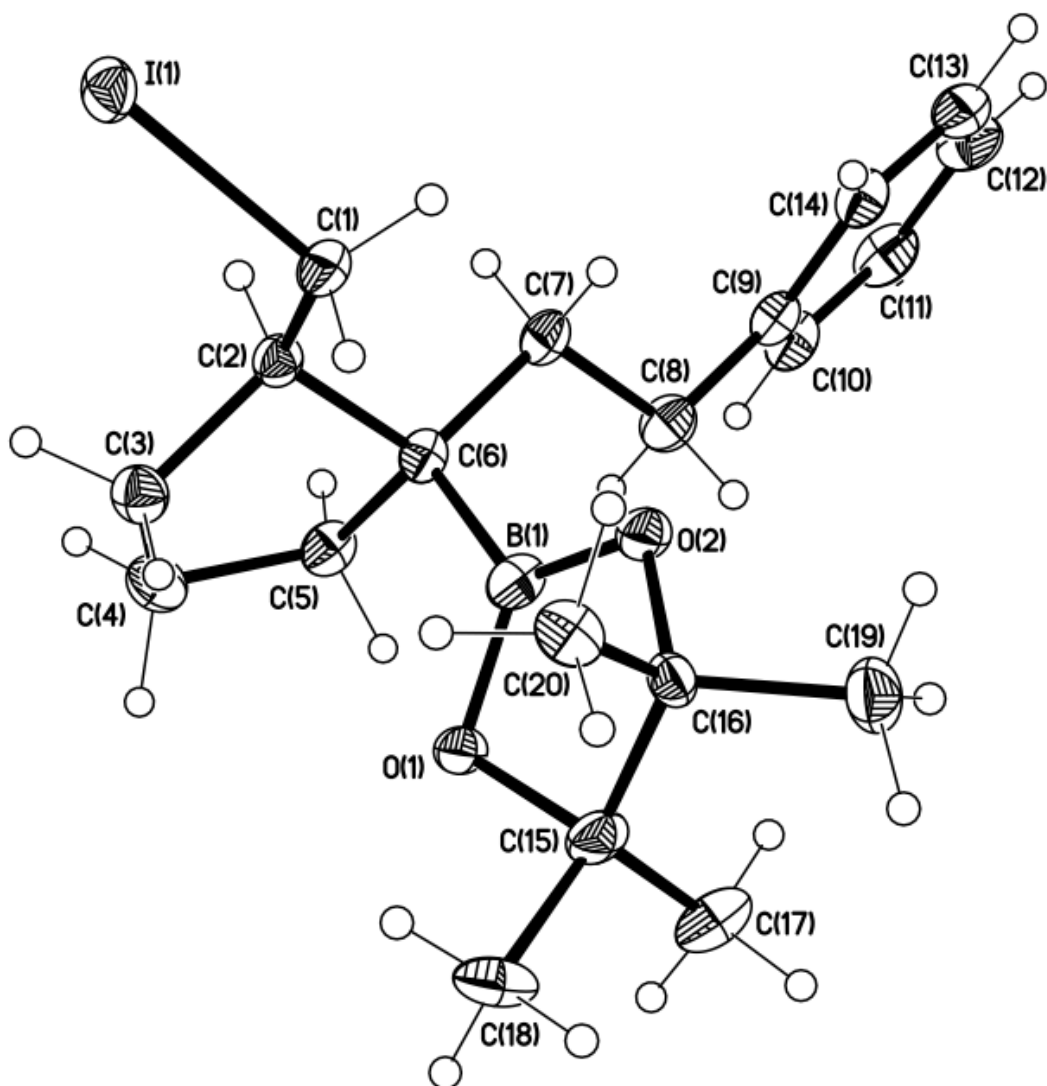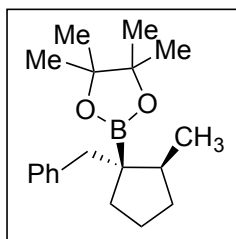

**2-((1*R*,2*S*)-1-benzyl-2-methylcyclopentyl)-4,4,5,5-tetramethyl-1,3,2-dioxaborolane (13).** The reaction was performed according to *Representative Procedure for Deborylative Cyclization* with 1,1-diboronate ester **S6** (85.2 mg, 0.2 mmol), KO*t*-Bu (44.8 mg, 0.4 mmol) and THF (1 mL). The crude reaction mixture was purified on silica gel (hexanes: ethyl acetate = 100 : 0.8, stain in CAM) to afford the desired product as a colorless oil (39.2 mg, 65%, > 20:1 dr, crude NMR shows the same diastereoselectivity). <sup>1</sup>H NMR (600 MHz, CDCl<sub>3</sub>): δ 7.27 – 7.18 (m, 4H), 7.17 – 7.10 (m, 1H), 2.97 (d, *J* = 13.2 Hz, 1H), 2.43 (d, *J* = 13.3 Hz, 1H), 1.87 – 1.79 (m, 2H), 1.75 – 1.50 (m, 3H), 1.47 – 1.36 (m, 1H), 1.30 – 1.20 (m, 1H), 1.19 (s, 6H), 1.14 (s, 6H), 1.05 (d, *J* = 6.9 Hz, 3H); <sup>13</sup>C NMR (125 MHz, CDCl<sub>3</sub>): δ 141.15, 130.14, 127.56, 125.49, 82.91, 44.35, 42.89, 33.97, 33.77,

25.14, 24.93, 22.24, 17.55; **IR** (neat): 2976.8 (m), 2953.6 (m), 2930.1 (m), 2869.0 (w), 1453.4 (w), 1387.9 (m), 1298.8 (m), 1211.8 (w), 1143.0 (s), 965.7 (w), 858.5 (w), 758.5 (w), 701.1 (m)  $\text{cm}^{-1}$ ; **HRMS**-(DART+) for  $^{12}\text{C}_{19}\text{H}_{29}\text{B}_1\text{O}_2$   $[\text{M}+\text{H}]^+$ : calculated: 301.2339, found: 301.2336.

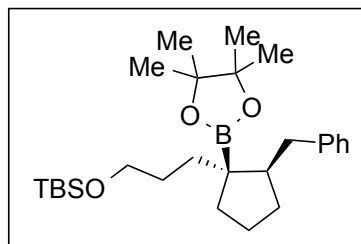

**(3-((1R,2R)-2-benzyl-1-(4,4,5,5-tetramethyl-1,3,2-dioxaborolan-2-yl)cyclopentyl)propoxy)(tert-butyl)dimethylsilane**

**(18)**. The reaction was performed according to *Representative Procedure for Deborylative Cyclization* with 1,1-diboronate ester **S2** (58.5 mg, 0.1 mmol),  $\text{KO}t\text{-Bu}$  (22.4 mg, 0.2 mmol) and THF (0.5 mL). The crude reaction mixture was purified on silica gel (hexanes: ethyl acetate = 100 : 0.8, stain in CAM)

to afford the desired product as a white solid (30 mg, 65%, > 20:1 dr, crude NMR shows the same diastereoselectivity).  $^1\text{H}$  NMR (600 MHz,  $\text{CDCl}_3$ )  $\delta$  7.29 – 7.22 (m, 2H), 7.18 – 7.13 (m, 3H), 3.67 – 3.54 (m, 2H), 2.98 (dd,  $J$  = 13.2, 3.3 Hz, 1H), 2.33 (dd,  $J$  = 13.2, 11.6 Hz, 1H), 1.98 (ddd,  $J$  = 12.5, 8.7, 4.8 Hz, 1H), 1.82 – 1.43 (m, 7H), 1.35 – 1.21 (m, 2H), 1.27 (s, 12H), 1.21 – 1.06 (m, 1H), 0.91 (s, 9H), 0.06 (s, 6H);  $^{13}\text{C}$  NMR (125 MHz,  $\text{CDCl}_3$ ):  $\delta$  143.00, 128.80, 128.07, 125.41, 82.93, 64.26, 53.02, 39.37, 34.41, 34.35, 31.36, 30.94, 26.02, 25.12, 24.89, 22.41, 18.40, -5.17; **IR** (neat): 2975.9 (w), 2951.9 (m), 2929.1 (m), 2856.3 (m), 1453.9 (w), 1386.9 (m), 1299.6 (m), 1253.8 (m), 1215.5 (w), 1142.3 (s), 1098.6 (m), 990.1 (w), 835.3 (s), 775.1 (m), 698.6 (w)  $\text{cm}^{-1}$ ; **HRMS**-(DART+) for  $^{12}\text{C}_{27}\text{H}_{48}\text{B}_1\text{O}_3\text{Si}_1$   $[\text{M}+\text{H}]^+$ : calculated: 459.3466, found: 459.3454.

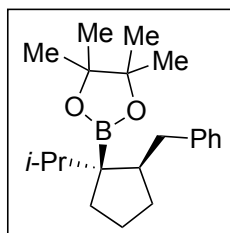

**2-((1R,2R)-2-benzyl-1-isopropylcyclopentyl)-4,4,5,5-tetramethyl-1,3,2-dioxaborolane** (**19**). The reaction was performed according to *Representative Procedure for Deborylative Cyclization* with 1,1-diboronate ester **S3** (90.9 mg, 0.2 mmol),  $\text{KO}t\text{-Bu}$  (44.8 mg, 0.4 mmol) and THF (1 mL). The crude reaction mixture was purified on silica gel (hexanes: ethyl acetate = 100 : 0.8, stain in CAM) to afford the desired product as a white solid

(34.5 mg, 52.5%, > 20:1 dr, crude NMR shows the same diastereoselectivity).  $^1\text{H}$  NMR (500 MHz,  $\text{CDCl}_3$ ):  $\delta$  7.29 – 7.22 (m, 2H), 7.19 – 7.12 (m,  $J$  = 6.9, 5.7, 1.4 Hz, 3H), 2.97 (dd,  $J$  = 13.2, 3.1 Hz, 1H), 2.34 (dd,  $J$  = 13.3, 11.7 Hz, 1H), 2.02 – 1.75 (m, 3H), 1.74 – 1.61 (m, 1H), 1.64 – 1.52 (m, 1H), 1.45 – 1.32 (m, 2H), 1.28 (s, 12H), 1.28 – 1.18 (m, 1H), 0.97 (d,  $J$  = 6.8 Hz, 3H), 0.89 (d,  $J$  = 6.8 Hz, 3H);  $^{13}\text{C}$  NMR (125 MHz,  $\text{CDCl}_3$ ):  $\delta$  143.29, 128.77, 128.07, 125.39, 82.83, 48.45, 39.32, 31.82, 31.14, 29.17, 25.19, 24.93, 22.49, 21.15, 17.15; **IR** (neat): 2955.3 (m), 2870.1 (w), 1495.1 (w), 1380.1 (m), 1297.7 (m), 1212.7 (w), 1140.6 (s), 982.1 (w), 864.9 (w), 745.6 (w), 699.2 (m)  $\text{cm}^{-1}$ ; **HRMS**-(DART+) for  $^{12}\text{C}_{21}\text{H}_{34}\text{B}_1\text{O}_2$   $[\text{M}+\text{H}]^+$ : calculated: 329.2652, found: 329.2655.

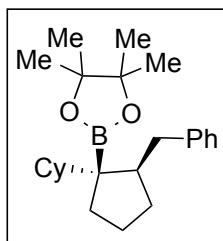

**2-((1R,2R)-2-benzyl-1-cyclohexylcyclopentyl)-4,4,5,5-tetramethyl-1,3-dioxaborolane (17).** The reaction was performed according to *Representative Procedure for Deborylative Cyclization* with 1,1-diboronate ester **S4** (98.9 mg, 0.2 mmol), KO*t*-Bu (44.8 mg, 0.4 mmol) and THF (1 mL). The crude reaction mixture was purified on silica gel (hexanes: ethyl acetate = 100 : 0.8, stain in CAM) to afford the desired product as a white solid (59 mg, 80%, > 20:1 dr, crude NMR shows the same diastereoselectivity). <sup>1</sup>H NMR (600 MHz, CDCl<sub>3</sub>): δ 7.34 – 7.21 (m, 2H), 7.21 – 7.12 (m, 3H), 2.97 (dd, *J* = 13.3, 3.2 Hz, 1H), 2.34 (dd, *J* = 13.3, 11.9 Hz, 1H), 2.00 – 1.91 (m, 1H), 1.84 – 1.76 (m, 1H), 1.79 – 1.67 (m, 3H), 1.66 – 1.58 (m, 3H), 1.61 – 1.50 (m, 2H), 1.45 – 1.31 (m, 2H), 1.33 – 1.19 (m, 14H), 1.22 – 1.17 (m, 2H), 1.17 – 1.08 (m, 1H), 1.09 – 0.95 (m, 1H); <sup>13</sup>C NMR (125 MHz, CDCl<sub>3</sub>): δ 143.30, 128.78, 128.05, 125.36, 82.80, 47.14, 41.83, 39.18, 31.65, 31.56, 30.06, 27.34, 27.12, 27.08, 27.04, 25.22, 24.90, 22.39; IR (neat): 2976.2 (m), 2925.3 (s), 2851.6 (m), 1449.0 (w), 1378.7 (m), 1297.3 (m), 1212.8 (w), 1141.8 (s), 864.2 (w), 746.5 (w), 698.8 (m) cm<sup>-1</sup>; HRMS-(DART+) for <sup>12</sup>C<sub>24</sub><sup>1</sup>H<sub>38</sub><sup>11</sup>B<sub>1</sub><sup>16</sup>O<sub>2</sub> [M+H]<sup>+</sup>: calculated: 369.2965, found: 369.2967. The relative stereochemistry was assigned by X-ray crystallography.

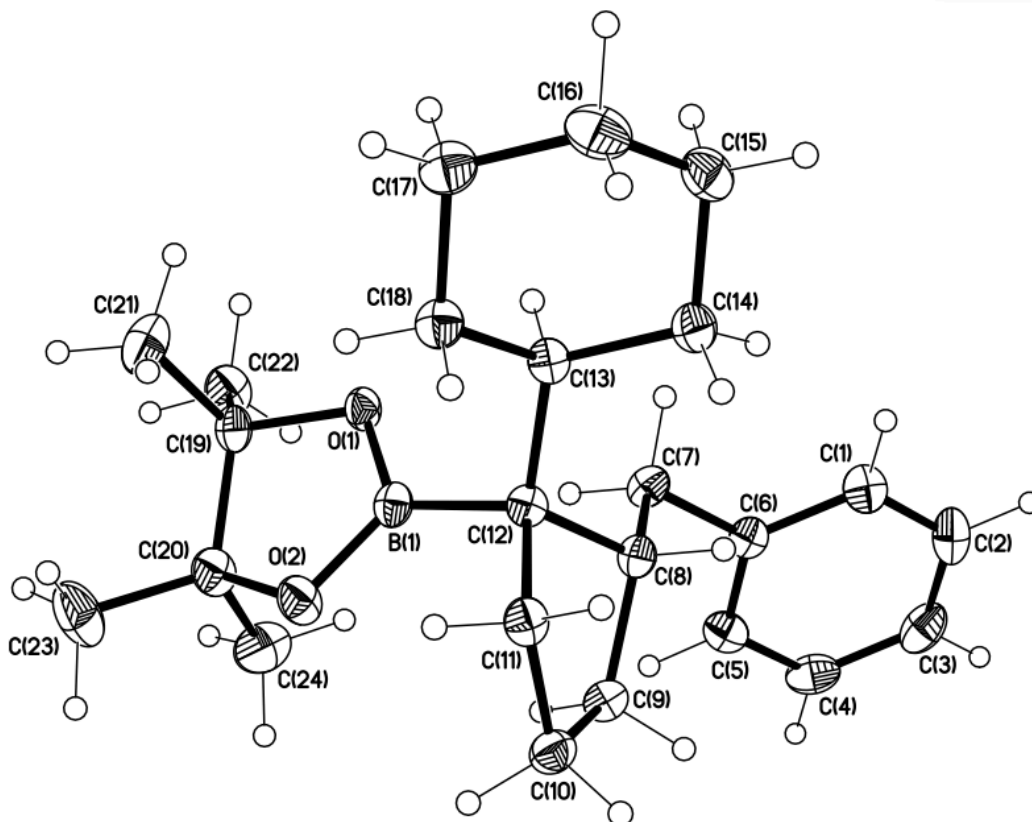

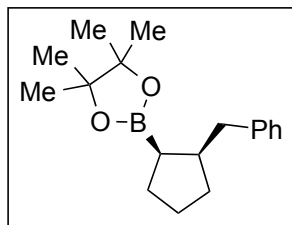

**2-((1R,2R)-2-benzylcyclopentyl)-4,4,5,5-tetramethyl-1,3,2-dioxaborolane (20).** The reaction was performed according to *Representative Procedure for Deborylative Cyclization* with 1,1-diboronate ester **S5** (82.4 mg, 0.2 mmol), KO<sup>t</sup>Bu (44.8 mg, 0.4 mmol) and THF (1 mL). The crude reaction mixture was purified on silica gel (hexanes: ethyl acetate = 100 : 0.8, stain in CAM) to afford

the desired product as a colorless oil (25.7 mg, 45%, > 18:1 dr, crude NMR shows the same diastereoselectivity). <sup>1</sup>H NMR (600 MHz, CDCl<sub>3</sub>): δ 7.29 – 7.21 (m, 2H), 7.20 – 7.12 (m, 3H), 2.78 (dd, *J* = 13.4, 5.9 Hz, 1H), 2.51 (dd, *J* = 13.4, 8.6 Hz, 1H), 2.21 – 2.11 (m, 1H), 1.87 – 1.77 (m, 1H), 1.77 – 1.65 (m, 1H), 1.66 – 1.44 (m, 3H), 1.27 (d, *J* = 4.5 Hz, 1H), 1.18 (s, 6H), 1.17 (s, 6H), 0.99 – 0.86 (m, 1H); <sup>13</sup>C NMR (125 MHz, CDCl<sub>3</sub>): δ 142.22, 128.98, 128.05, 125.48, 82.72, 45.07, 42.49, 33.51, 28.47, 25.84, 24.72, 24.70; IR (neat): 2956.1 (s), 2932.8 (m), 2919.8 (m), 2876.6 (w), 2861.0 (w), 2361.0 (m), 2163.9 (s), 2013.9 (w), 1728.4 (s), 1379.0 (m), 1290.6 (s), 1316.8 (m), 1145.8 (m), 763.7 (w) cm<sup>-1</sup>; HRMS-(DART+) for <sup>12</sup>C<sub>18</sub><sup>1</sup>H<sub>27</sub><sup>11</sup>B<sub>1</sub><sup>16</sup>O<sub>2</sub> [M+H]<sup>+</sup>: calculated: 287.2182, found: 287.2194. Relative configuration was determined after oxidation and comparison with reported data.<sup>8</sup> To a 20 mL vial containing 2-((1R,2R)-2-benzylcyclopentyl)-4,4,5,5-tetramethyl-1,3,2-dioxaborolane (10 mg, 0.035mmol), NaOH solution (3M, 1 mL) is added followed by THF (1 mL). The vial is then cooled to 0°C and H<sub>2</sub>O<sub>2</sub> (30 wt%, 1 mL) is carefully added. The reaction mixture is then allowed to stir at room temperature for three hours, at which point, the mixture is cooled back to 0°C and saturated, aqueous Na<sub>2</sub>S<sub>2</sub>O<sub>3</sub> (1 mL) is added to degrade excess H<sub>2</sub>O<sub>2</sub>. The mixture is then extracted with ethyl acetate three times and the combined organics dried over Na<sub>2</sub>SO<sub>4</sub>, and concentrated *in vacuo*. <sup>1</sup>H NMR (500 MHz, CDCl<sub>3</sub>): δ 7.32 – 7.27 (m, 2H), 7.22 – 7.17 (m, 3H), 3.96 – 3.87 (m, 1H), 2.76 (dd, *J* = 13.6, 6.9 Hz, 1H), 2.55 (dd, *J* = 13.6, 8.2 Hz, 1H), 2.08 – 2.00 (m, 1H), 1.99 – 1.92 (m, 1H), 1.89 – 1.80 (m, 1H), 1.77 – 1.66 (m, 1H), 1.66 – 1.54 (m, 2H), 1.34 – 1.25 (m, 1H), 1.23 (d, *J* = 4.1 Hz, 1H).

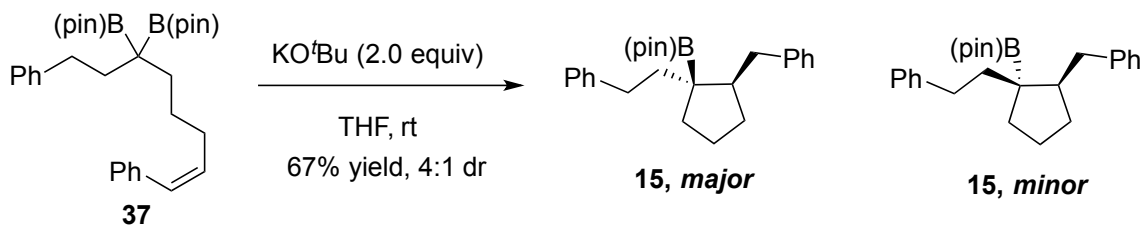

<sup>8</sup> Simpson, A. F.; Bodkin, C. D.; Butts, C. P.; Armitage, M. A.; Gallagher, T. J. *Chem. Soc., Perkin Trans. I* **2000**, 3047.

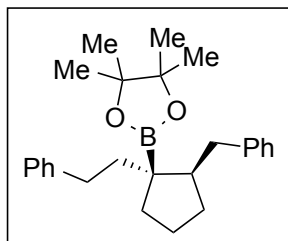

**2-((1*R*,2*R*)-2-benzyl-1-phenethylcyclopentyl)-4,4,5,5-tetramethyl-1,3,2-dioxaborolane (15, major diastereomer).** The reaction was performed according to *Representative Procedure for Deborylative Cyclization* with 1,1-diboronate ester **37** (103.3 mg, 0.2 mmol), KO*t*-Bu (44.8 mg, 0.4 mmol) and THF (1 mL). The crude reaction mixture was purified on silica gel (hexanes: ethyl acetate = 100 : 0.8, stain in CAM) to afford the desired product as a white solid (52.7

mg, 67%, 4:1 dr, crude NMR shows the same diastereoselectivity).  $^1\text{H NMR}$  (500 MHz,  $\text{CDCl}_3$ ):  $\delta$  7.32 – 7.12 (m, 10H), 3.01 (dd,  $J = 13.2, 3.3$  Hz, 1H), 2.62 (ddd,  $J = 10.4, 5.8, 3.5$  Hz, 2H), 2.36 (dd,  $J = 13.2, 11.6$  Hz, 1H), 2.20 – 2.04 (m, 2H), 1.81 – 1.47 (m, 5H), 1.46 – 1.31 (m, 2H), 1.31 (s, 6H), 1.31 (s, 6H);  $^{13}\text{C NMR}$  (125 MHz,  $\text{CDCl}_3$ ):  $\delta$  143.76, 142.91, 128.80, 128.34, 128.25, 128.09, 125.50, 125.44, 83.07, 53.06, 41.31, 39.41, 34.42, 34.17, 31.42, 25.28, 24.89, 22.49; ;  $\text{IR}$  (neat): 2976.2 (m), 2930.8 (m), 2857.6 (w), 1495.3 (w), 1453.6 (m), 1386.7 (m), 1344.8 (w), 1300.7 (m), 1213.8 (m), 1141.2 (s), 1029.5 (w), 967.3 (w), 855.4 (w), 746.9 (m), 697.9 (s)  $\text{cm}^{-1}$ ;  $\text{HRMS}$ -(DART+) for  $^{12}\text{C}_{26}^{1}\text{H}_{39}^{11}\text{B}_1^{14}\text{N}_1^{16}\text{O}_2$   $[\text{M}+\text{NH}_4]^+$ : calculated: 408.3074, found: 408.3091. The relative stereochemistry was assigned by X-ray crystallography.

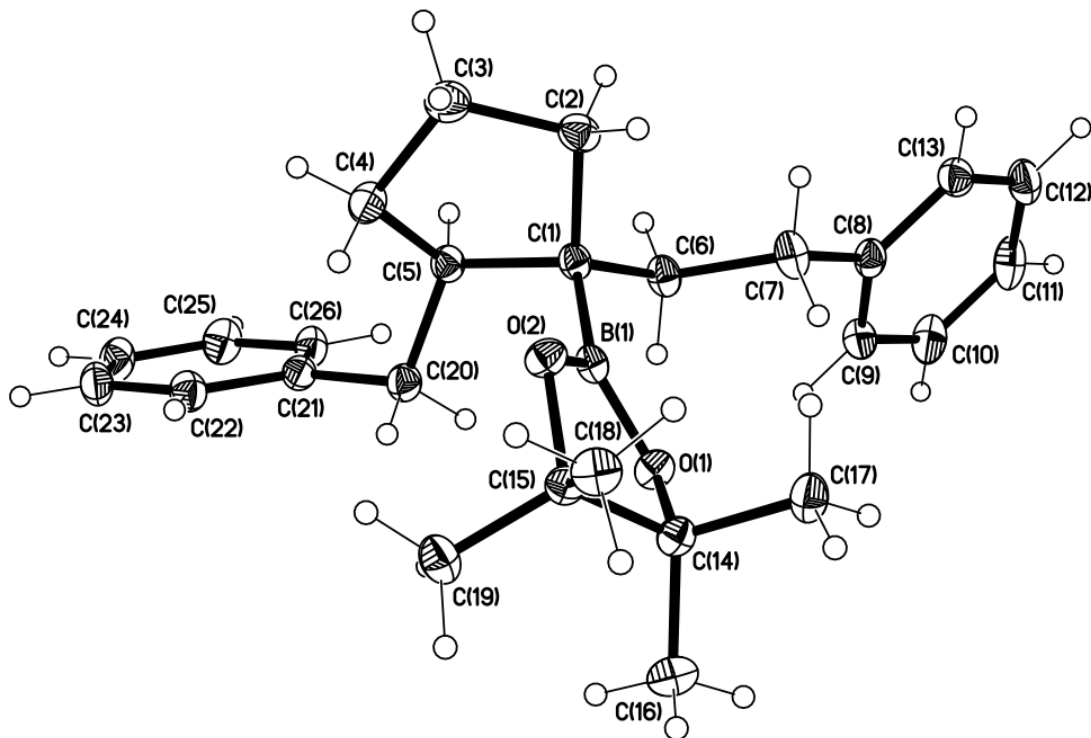

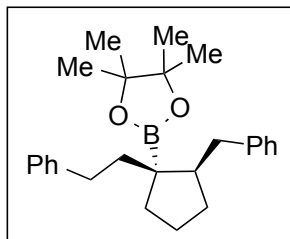

**2-((1*S*,2*R*)-2-benzyl-1-phenethylcyclopentyl)-4,4,5,5-tetramethyl-1,3-dioxaborolane (**15**, minor diastereomer).**  $^1\text{H NMR}$  (600 MHz,  $\text{CDCl}_3$ ):  $\delta$  7.29 (t,  $J = 7.6$  Hz, 2H), 7.29 – 7.16 (m, 4H), 7.19 – 7.07 (m, 4H), 2.96 (dd,  $J = 13.1, 3.3$  Hz, 1H), 2.63 – 2.55 (m, 2H), 2.29 (dd,  $J = 13.1, 11.8$  Hz, 1H), 2.18 – 2.10 (m, 1H), 1.87 (ddd,  $J = 13.3, 10.4, 6.4$  Hz, 2H), 1.74 – 1.64 (m, 2H), 1.61 – 1.44 (m, 3H), 1.38 – 1.27 (m, 1H), 1.31 (s, 6H), 1.31 (s, 6H);  $^{13}\text{C NMR}$  (150 MHz,  $\text{CDCl}_3$ ):  $\delta$  143.80, 142.83, 128.81, 128.38, 128.28, 128.11, 125.55, 125.42, 83.05, 48.64, 36.78, 34.07, 33.33, 32.55, 29.80, 24.99, 24.71, 22.71;  $\text{IR}$  (neat): 2957.0 (s), 2930.9 (s), 2863.3 (m), 1728.6 (m), 1455.6 (w), 1376.6 (m), 1272.7 (m), 1142.1 (s), 1072.5 (w), 747.1 (w), 699.6 (m)  $\text{cm}^{-1}$ ;  $\text{HRMS}$ -(DART+) for  $^{12}\text{C}_{26}\text{H}_{39}\text{B}_1\text{N}_1\text{O}_2$   $[\text{M}+\text{NH}_4]^+$ : calculated: 408.3074, found: 408.3079.

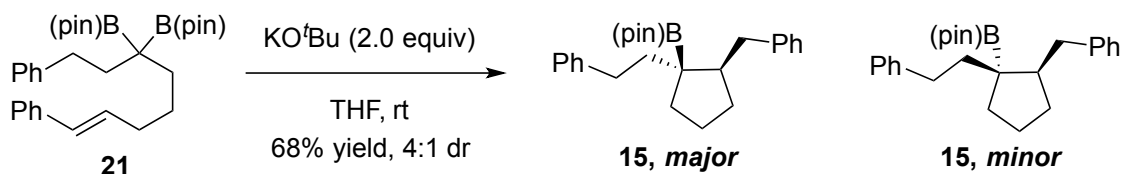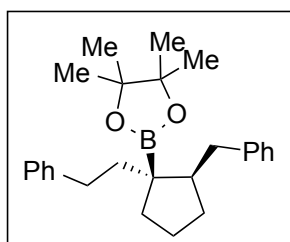

**2-((1*R*,2*R*)-2-benzyl-1-phenethylcyclopentyl)-4,4,5,5-tetramethyl-1,3-dioxaborolane (**15**, major diastereomer).** The reaction was performed according to *Representative Procedure for Deborylative Cyclization* with 1,1-diboronate ester **21** (103.3 mg, 0.2 mmol),  $\text{KOt-Bu}$  (44.8 mg, 0.4 mmol) and THF (1 mL). The crude reaction mixture was purified on silica gel (hexanes: ethyl acetate = 100 : 0.8, stain in CAM) to afford the desired product as a white solid (53.5 mg, 68%, 4:1 dr, crude NMR shows the same diastereoselectivity). The spectra is the same as above.



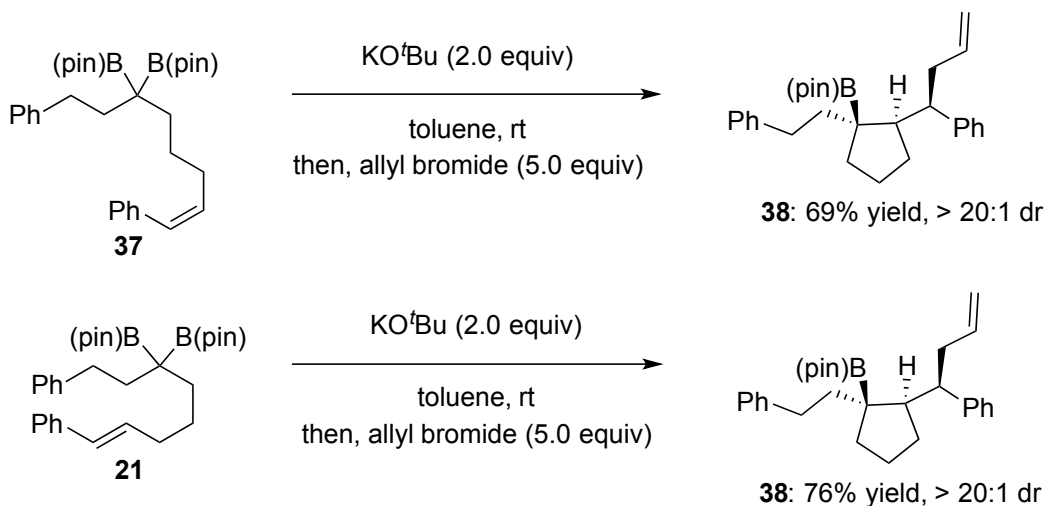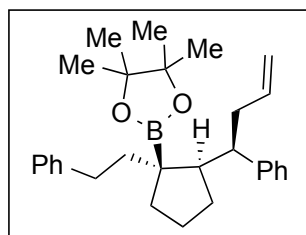

**4,4,5,5-tetramethyl-2-((1*R*,2*R*)-1-phenethyl-2-((*R*)-1-phenylbut-3-en-1-yl)cyclopentyl)-1,3,2-dioxaborolane (38)**. The reaction was performed according to *Representative Procedure for Deborylative Cyclization* with (*Z*)-2,2'-(1,8-diphenyloct-7-ene-3,3-diyl)bis(4,4,5,5-tetramethyl-1,3,2-dioxaborolane) (**37**) (56.13 mg, 0.1 mmol), *KOt*-Bu (22.4 mg, 0.2 mmol) and toluene (0.5 mL). Upon completion, the reaction mixture is quenched with

allyl bromide (60.5 mg, 0.5 mmol) and allowed stir an additional two hours. Mixture then diluted with diethyl ether (2 mL) and filtered through a silica gel plug, rinsing with diethyl ether. Filtrate is then concentrated *in vacuo* and the crude residue purified on silica gel (hexanes: ethyl acetate = 100 : 0.8, stain in CAM) to afford the desired product as a white solid (30.7 mg, 69%, >10:1 dr, crude NMR shows the same diastereoselectivity).  $^1\text{H NMR}$  (500 MHz,  $\text{CDCl}_3$ ):  $\delta$  7.30 – 7.18 (m, 4H), 7.19 – 7.11 (m, 3H), 7.14 – 7.04 (m, 1H), 6.91 – 6.85 (m, 2H), 5.50 (dddd,  $J = 18.0, 10.0, 7.4, 6.0$  Hz, 1H), 4.85 (dd,  $J = 17.1, 1.7$  Hz, 1H), 4.81 – 4.76 (d,  $J = 10.0$ , 1H), 2.92 (td,  $J = 10.2, 8.8, 3.7$  Hz, 1H), 2.59 – 2.47 (m, 1H), 2.40 (td,  $J = 13.2, 4.5$  Hz, 1H), 2.36 – 2.25 (m, 2H), 1.97 (td,  $J = 8.9, 8.4, 4.8$  Hz, 2H), 1.87 (q,  $J = 8.7$  Hz, 1H), 1.73 (p,  $J = 9.9, 8.7$  Hz, 1H), 1.66 – 1.49 (m, 2H), 1.43 – 1.31 (m, 2H), 1.29 (s, 6H), 1.28 (s, 6H), 0.83 (td,  $J = 13.0, 5.2$  Hz, 1H);  $^{13}\text{C NMR}$  (125 MHz,  $\text{CDCl}_3$ ):  $\delta$  145.72, 143.69, 137.68, 128.66, 128.13, 127.90, 127.78, 125.68, 125.13, 115.16, 82.78, 55.13, 48.35, 39.72, 39.16, 35.59, 32.69, 30.42, 25.29, 24.91, 22.08; **IR** (neat): 2956.9 (s), 2930.5 (s), 2872.6 (m), 1729.4 (s), 1457.5 (m), 1379.2 (m), 1288.9 (s), 1239.1 (w), 1141.6 (s), 1073.0 (m), 755.5 (m), 700.3 (m)  $\text{cm}^{-1}$ ; **HRMS**-(DART+) for  $^{12}\text{C}_{29}\text{H}_{40}\text{B}_1\text{O}_2$   $[\text{M}+\text{H}]^+$ : calculated: 431.3121, found: 431.3115. The relative stereochemistry was assigned by X-ray crystallography.

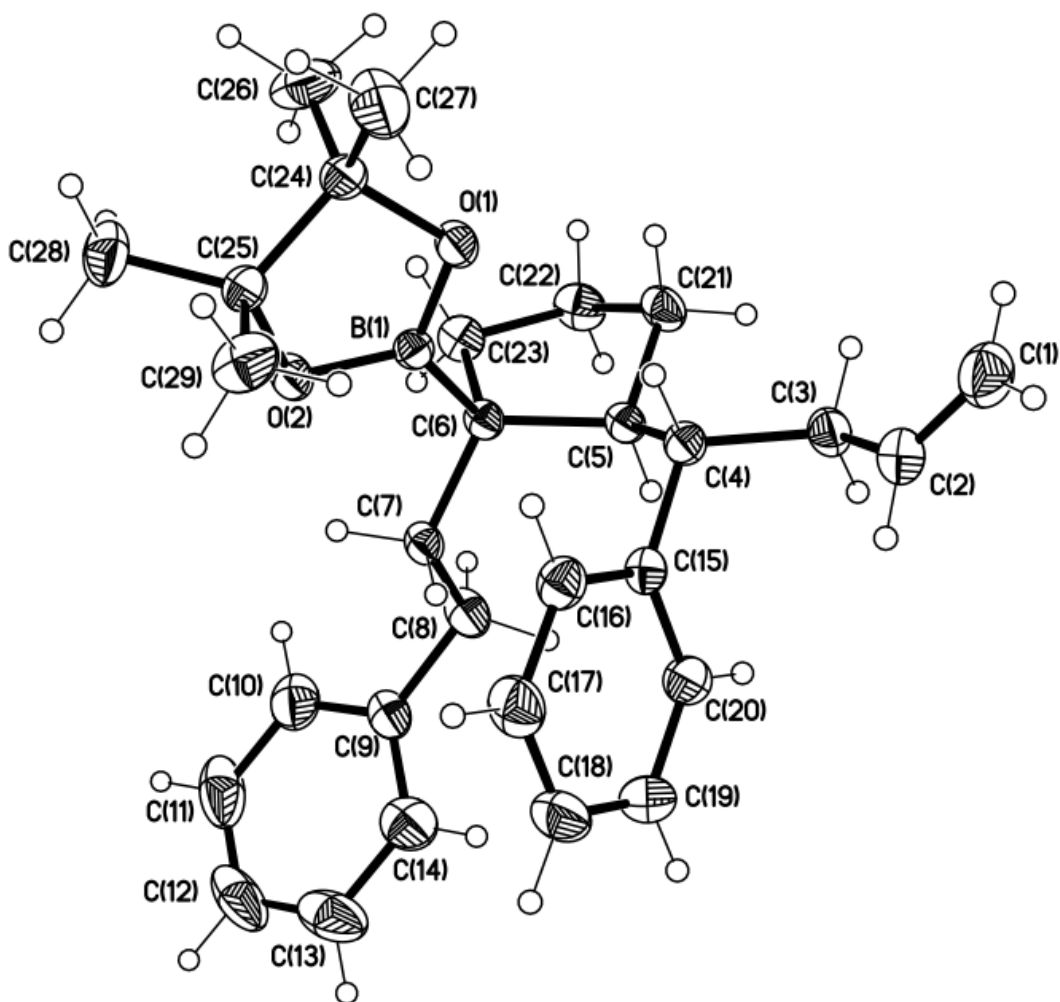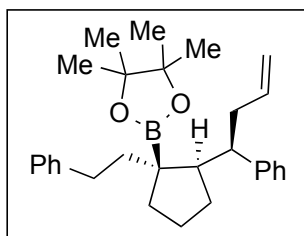

**4,4,5,5-tetramethyl-2-((1*R*,2*R*)-1-phenethyl-2-((*R*)-1-phenylbut-3-en-1-yl)cyclopentyl)-1,3,2-dioxaborolane (38)**. The reaction was performed according to *Representative Procedure for Deborylative Cyclization* with (*E*)-2,2'-(1,8-diphenyloct-7-ene-3,3-diyl)bis(4,4,5,5-tetramethyl-1,3,2-dioxaborolane) (**21**) (56.13 mg, 0.1 mmol), *KOt*-Bu (22.4 mg, 0.2 mmol) and toluene

(0.5 mL). Upon completion, the reaction mixture was quenched with allyl bromide (60.5 mg, 0.5 mmol), stir for another two hours, then diluted with diethyl ether (2 mL), filtered through a silica gel plug, rinsed with diethyl ether, and concentrated *in vacuo*. The crude reaction mixture was purified on silica gel (hexanes: ethyl acetate = 100 : 0.8, stain in CAM) to afford the desired product as a white solid (32.7 mg, 76%, >20:1 dr). <sup>1</sup>H and <sup>13</sup>C NMR spectral data and X-ray crystallographic data identical to that **above**.

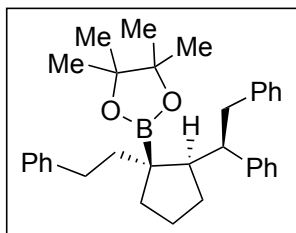

**2-((1*R*,2*R*)-2-((*R*)-1,2-diphenylethyl)-1-phenethylcyclopentyl)-4,5,5,5-tetramethyl-1,3,2-dioxaborolane (16).** The reaction was performed according to *Representative Procedure for Deborylative Cyclization* with 1,1-diboronate ester **37** (103.2 mg, 0.2 mmol), KO*t*-Bu (44.8 mg, 0.4 mmol) and THF (1 mL). Upon completion, the reaction mixture is quenched with benzyl bromide (171 mg, 1.0 mmol) and allowed to stir for an additional two hours. Mixture is

then diluted with diethyl ether (2 mL) and filtered through a silica gel plug, rinsing with diethyl ether, and concentrated *in vacuo*. The crude residue is then purified on silica gel (hexanes: ethyl acetate = 100 : 0.8, stain in CAM) to afford the desired product as a white solid (64 mg, 66 %, > 6:1 dr) with unresolved protonated byproduct. <sup>1</sup>H NMR (500 MHz, CDCl<sub>3</sub>): δ 7.14 (t, *J* = 7.5 Hz, 2H), 7.12 – 6.98 (m, 9H), 6.86 (d, *J* = 7.6 Hz, 4H), 3.19 (dd, *J* = 13.1, 3.7 Hz, 1H), 3.13 (ddd, *J* = 12.1, 8.6, 3.8 Hz, 1H), 2.69 (dd, *J* = 13.2, 11.6 Hz, 1H), 2.40 (td, *J* = 13.2, 4.5 Hz, 1H), 2.37 – 2.29 (m, 1H), 2.17 – 2.07 (m, 1H), 2.00 (ddd, *J* = 12.5, 8.4, 3.9 Hz, 2H), 1.84 – 1.67 (m, 2H), 1.68 – 1.57 (m, 1H), 1.45 – 1.33 (m, 1H), 1.32 – 1.24 (m, 1H), 1.27 (s, 6H), 1.27 (s, 6H), 0.84 (td, *J* = 12.9, 5.1 Hz, 1H); <sup>13</sup>C NMR (150 MHz, CDCl<sub>3</sub>): δ 145.28, 143.65, 141.22, 129.02, 128.71, 128.36, 128.10, 127.86, 127.58, 127.53, 125.50, 125.12, 125.10, 82.77, 54.97, 50.49, 41.70, 39.54, 35.68, 32.64, 30.95, 25.33, 24.83, 21.93; IR (neat): 3026.1 (w), 2929.9 (m), 2859.7 (w), 1728.7 (w), 1495.2 (w), 1453.2 (w), 1380.2 (m), 1141.5 (s), 967.6 (w), 862.8 (w), 746.1 (w), 697.9 (s) cm<sup>-1</sup>; HRMS-(DART+) for <sup>12</sup>C<sub>33</sub><sup>1</sup>H<sub>42</sub><sup>11</sup>B<sub>1</sub><sup>16</sup>O<sub>2</sub> [M+H]<sup>+</sup>: calculated: 481.3278, found: 481.3291. The relative stereochemistry was assigned by X-ray crystallography.

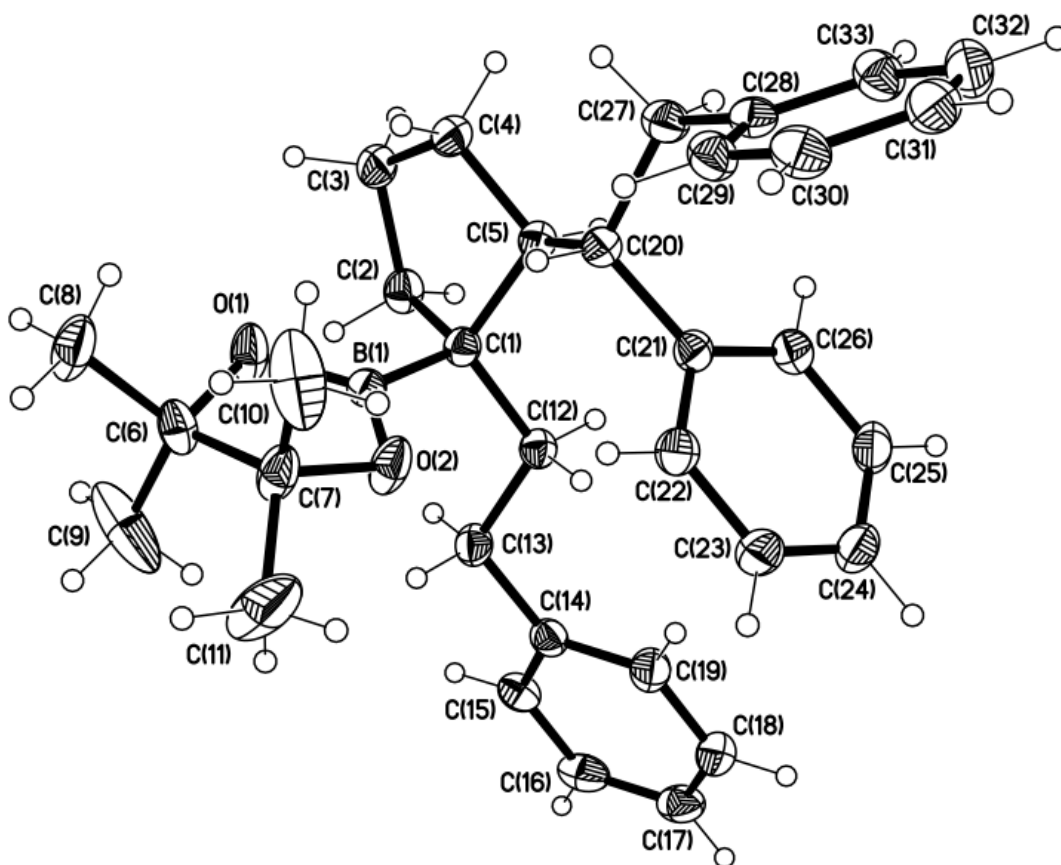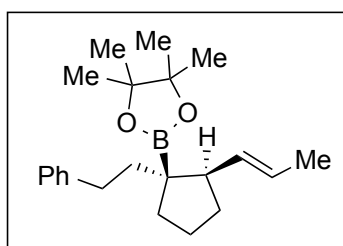

**4,4,5,5-tetramethyl-2-((1*R*,2*R*)-1-phenethyl-2-((*E*)-prop-1-en-1-yl)cyclopentyl)-1,3,2-dioxaborolane (23).** The reaction was performed according to *Representative Procedure for Deborylative Cyclization* with 1,1-diboronate ester **22** (46.6 mg, 0.1 mmol), KO*t*-Bu (22.4 mg, 0.2 mmol) and THF (0.5 mL). Upon completion, the reaction mixture is diluted with diethyl ether (2 mL) and filtered through a silica gel plug, rinsing with

diethyl ether, and concentrated *in vacuo*. The crude residue is then purified on silica gel (hexanes: diethyl ether = 100 : 1, stain in CAM) to afford the desired product as a colorless oil (18.8 mg, 55%, >20:1 dr, crude NMR shows the same diastereoselectivity).  $^1\text{H NMR}$  (500 MHz,  $\text{CDCl}_3$ ):  $\delta$  7.33 – 7.22 (m, 2H), 7.21 – 7.13 (m, 3H), 5.52 – 5.35 (m, 2H), 2.57 (td,  $J = 12.8, 4.9$  Hz, 2H), 2.47 (td,  $J = 12.9, 5.0$  Hz, 1H), 1.99 – 1.82 (m, 1H), 1.80 – 1.66 (m, 3H), 1.65 (dd,  $J = 4.8, 0.7$  Hz, 3H), 1.63 – 1.55 (m, 2H), 1.53 – 1.47 (m, 1H), 1.42 (td,  $J = 12.9, 5.0$  Hz, 1H), 1.26 (s, 12H);  $^{13}\text{C NMR}$  (125 MHz,  $\text{CDCl}_3$ ):  $\delta$  143.93, 132.52, 128.35, 128.16, 125.39, 124.38, 82.99, 49.25, 34.75, 34.01, 33.06, 31.09, 24.86, 24.71, 23.10, 18.08;  $\text{IR}$  (neat): 2976.5 (m), 2955.3 (m), 2870.6 (m), 1726.8 (w), 1454.8 (w), 1379.3 (s), 1304.3 (m), 1272.9 (m), 1143.3 (s), 968.1 (w), 857.0 (w), 757.3 (s), 699.3 (w)  $\text{cm}^{-1}$ ;  $\text{HRMS}$ -(DART+) for  $^{12}\text{C}_{22}\text{H}_{34}\text{B}_1\text{O}_2$   $[\text{M}+\text{H}]^+$ : calculated: 341.2652,

found: 341.2660.

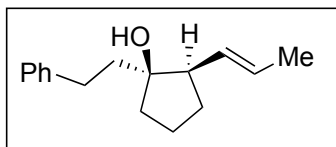

**(1S,2R)-1-phenethyl-2-((E)-prop-1-en-1-yl)cyclopentan-1-ol (S33)**. This reaction was performed to confirm the structure of compound

4,4,5,5-tetramethyl-2-((1R,2R)-1-phenethyl-2-((E)-prop-1-en-1-yl)cyclopentyl)-1,3,2-dioxaborolane (**23**). To a 20 mL vial containing the compound (**23**) (25 mg, 0.0745 mmol) add THF (1 mL), NaOH (0.6 mL, 3 M, 1.8 mmol), then cool the vial to 0 °C. Add hydrogen peroxide (0.3 mL, 30% in H<sub>2</sub>O) into the above mixture dropwise, let the reaction stir for overnight. The reaction was cooled to 0 °C again, and quenched by Na<sub>2</sub>S<sub>2</sub>O<sub>3</sub> (1 mL, saturated solution) slowly, stirred for 30 minutes, then extracted with diethyl ether, dried over Na<sub>2</sub>SO<sub>4</sub>, and evaporated *in vacuo*. The crude reaction mixture was purified by column chromatography (hexanes: ethyl acetate = 100 : 5 to 100 : 10, stain in CAM) on silica gel to afford desired product (11.8 mg, 70 % yield). <sup>1</sup>H NMR (600 MHz, CDCl<sub>3</sub>): δ 7.32 – 7.26 (m, 2H), 7.22 – 7.16 (m, 3H), 5.49 (dq, *J* = 15.1, 6.4, 0.9 Hz, 1H), 5.29 (ddq, *J* = 15.1, 9.2, 1.6 Hz, 1H), 2.80 (ddd, *J* = 13.4, 9.4, 7.5 Hz, 1H), 2.69 (ddd, *J* = 13.5, 9.6, 7.7 Hz, 1H), 2.51 – 2.40 (m, 1H), 2.10 – 2.02 (m, 1H), 1.84 – 1.71 (m, 5H), 1.70 – 1.65 (m, overlap, 1H), 1.67 (dd, *J* = 6.4, 1.7 Hz, 3H), 1.53 – 1.45 (m, 1H), 1.32 (s, 1H); <sup>13</sup>C NMR (125 MHz, CDCl<sub>3</sub>): δ 142.99, 131.63, 128.88, 128.37, 125.96, 125.68, 83.62, 54.55, 39.24, 37.23, 30.28, 30.19, 21.02, 18.07. The structure was further confirmed by COSY spectra, shown below.

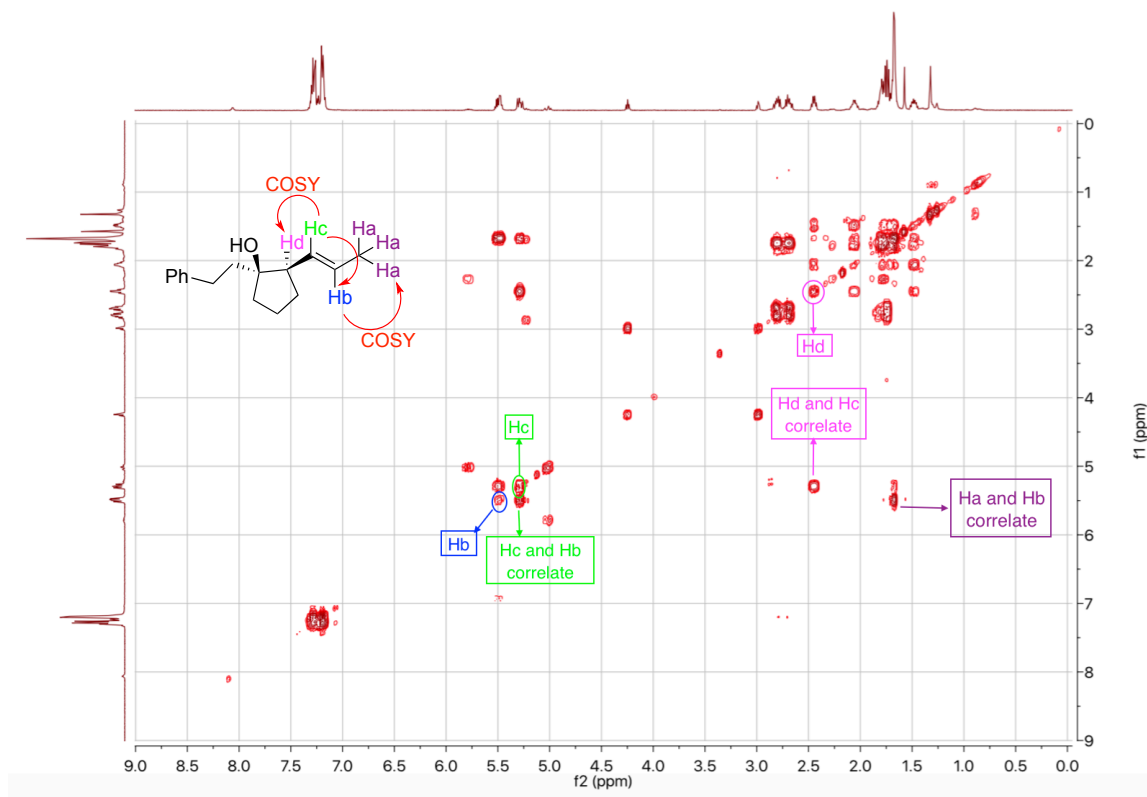

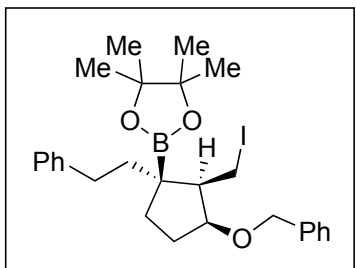

**(1S,2R,3S)-2-(iodomethyl)-3-phenethyl-3-(4,4,5,5-tetramethyl-1,3,2-dioxaborolan-2-yl)cyclopentyl benzoate (14, major product).** The reaction was performed according to *Representative Procedure for Deborylative cyclization* with diboronate ester **S7** (55 mg, 0.1 mmol), KO*t*-Bu (22.4 mg, 0.20 mmol) and THF (0.5 mL) for overnight. Upon completion, the reaction mixture is quenched with a solution of I<sub>2</sub> (50.8 mg, 0.20 mmol) in anhydrous THF (0.3 mL) and

allowed to stir at room temperature for three hours. Reaction mixture is then diluted with diethyl ether (2 mL) and filtered through a silica gel plug, rinsing with diethyl ether. Filtrate is then concentrated *in vacuo* and the crude residue purified by column chromatography on silica gel (100 : 0.8 Hexanes/EtOAc, gradient to 100 : 3 Hexanes/EtOAc, stain in CAM) to afford a colorless oil (29.3 mg, 55%, product **14** : product **S13** = 2.9 : 1). <sup>1</sup>H NMR (500 MHz, CDCl<sub>3</sub>): δ 7.42 – 7.38 (m, 2H), 7.36 – 7.30 (m, 2H), 7.29 – 7.24 (m, 3H), 7.20 – 7.14 (m, 3H), 4.55 (d, *J* = 1.9 Hz, 2H), 3.81 (qd, *J* = 4.6, 3.2 Hz, 1H), 3.52 (dd, *J* = 9.8, 4.8 Hz, 1H), 3.21 (t, *J* = 10.1 Hz, 1H), 2.67 – 2.50 (m, 2H), 2.28 (dt, *J* = 10.0, 4.8 Hz, 1H), 2.10 – 1.94 (m, 3H), 1.85 – 1.75 (m, 1H), 1.75 – 1.61 (m, 2H), 1.26 (two sets of singlet, 12H); <sup>13</sup>C NMR (125 MHz, CDCl<sub>3</sub>): δ 143.05, 138.81, 128.30, 128.26, 128.24, 127.85, 127.36, 125.59, 87.16, 83.41, 71.26, 57.60, 41.33, 33.47, 33.27, 30.50, 25.07, 24.90, 8.22; IR (neat): 2975.4 (w), 2926.7 (w), 2855.7 (w), 1495.8 (w), 1378.8 (m), 1310.9 (m), 1198.9 (m), 1166.4 (s), 1140.4 (s), 1099.2 (m), 1066.9 (m), 856.9 (m), 735.0 (s), 697.3 (s) cm<sup>-1</sup>; HRMS-(DART+) for <sup>12</sup>C<sub>27</sub><sup>1</sup>H<sub>36</sub><sup>11</sup>B<sub>1</sub><sup>16</sup>O<sub>3</sub><sup>127</sup>I<sub>1</sub><sup>23</sup>Na<sub>1</sub> [M+Na]<sup>+</sup>: calculated: 569.1700, found: 569.1707. The relative stereochemistry was assigned by COSY and NOESY spectra, shown below.

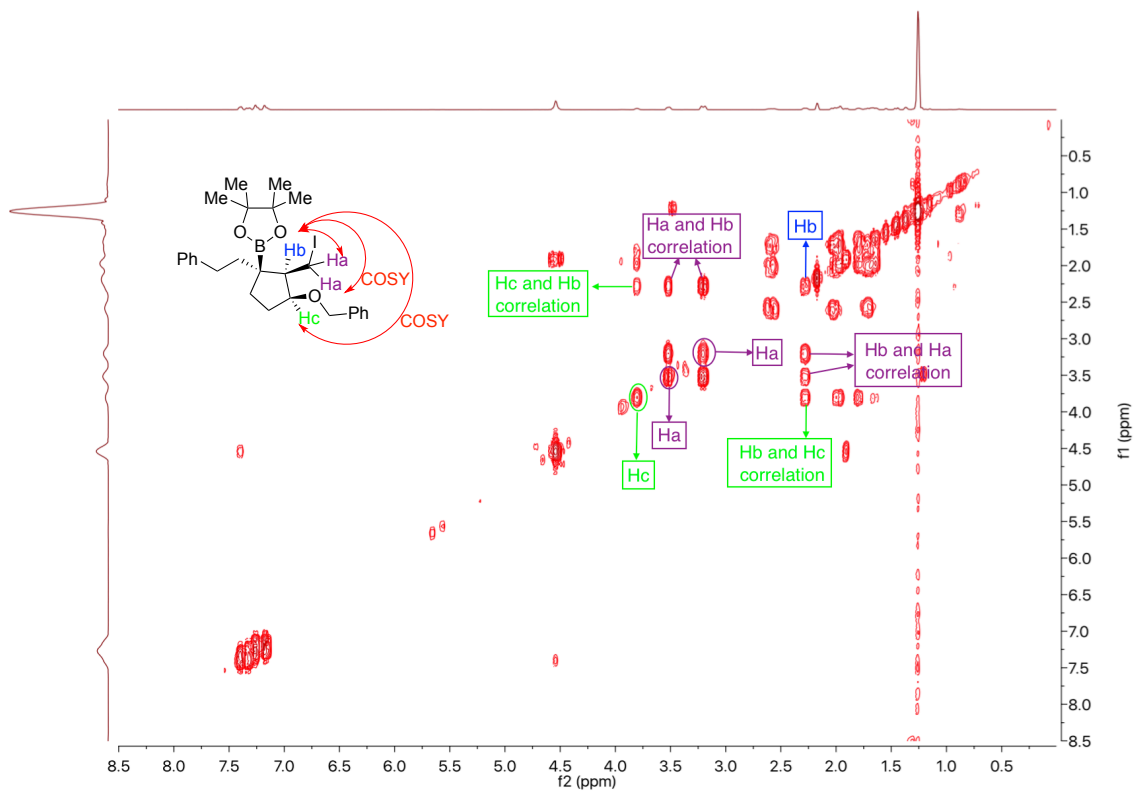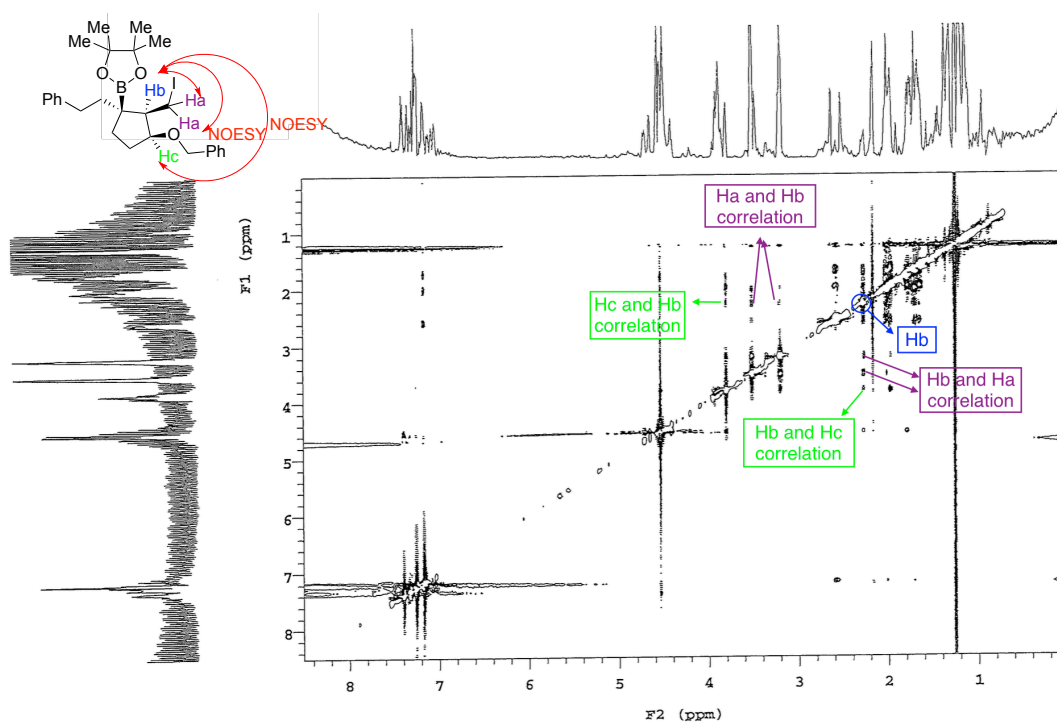

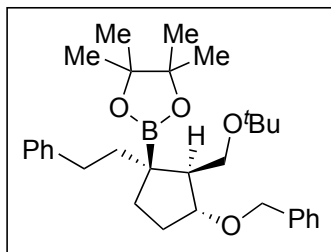

**2-((1*S*,2*S*,3*R*)-3-(benzyloxy)-2-(*tert*-butoxymethyl)-1-phenethyl cyclopentyl)-4,4,5,5-tetramethyl-1,3,2-dioxaborolane (S13, *minor product*).** This product was isolated along side the above

product (14).  $^1\text{H NMR}$  (500 MHz,  $\text{CDCl}_3$ ):  $\delta$  7.37 – 7.33 (m, 2H), 7.33 – 7.28 (m, 2H), 7.28 – 7.22 (m, 3H), 7.21 – 7.17 (m, 2H), 7.17 – 7.13 (m, 1H), 4.57 (d,  $J = 12.3$  Hz, 1H), 4.50 (d,  $J = 12.3$  Hz, 1H), 3.82 (dt,  $J = 6.9, 3.5$  Hz, 1H), 3.52 (dd,  $J = 8.8, 5.0$  Hz,

1H), 3.18 (dd,  $J = 9.8, 8.8$  Hz, 1H), 2.68 – 2.47 (m, 2H), 2.07 – 1.92 (m, 3H), 1.87 (ddd,  $J = 11.5, 7.1, 4.1$  Hz, 1H), 1.83 – 1.67 (m, 2H), 1.63 (ddd,  $J = 11.9, 9.5, 7.4$  Hz, 1H), 1.26 (s, 12H), 1.16 (s, 9H);  $^{13}\text{C NMR}$  (125 MHz,  $\text{CDCl}_3$ ):  $\delta$  143.68, 139.66, 128.39, 128.17, 128.12, 127.59, 127.00, 125.38, 84.60, 82.99, 72.49, 70.49, 62.86, 56.23, 41.83, 33.73, 32.97, 31.65, 27.66, 25.11, 24.93;  $\text{IR}$  (neat): 3026.0 (w), 2972.8 (s), 2927.6 (m), 2857.0 (m), 1496.0 (m), 1378.4 (s), 1307.1 (m), 1198.5 (m), 1143.6 (s), 1073.9 (m), 857.5 (w), 698.5 (w)  $\text{cm}^{-1}$ ;  $\text{HRMS}$ -(DART+) for  $^{12}\text{C}_{31}\text{H}_{45}^{11}\text{B}_1^{16}\text{O}_4^{23}\text{Na}_1$   $[\text{M}+\text{Na}]^+$ : calculated: 515.3309, found: 515.3320. The relative stereochemistry was assigned by X-ray crystallography, shown below:

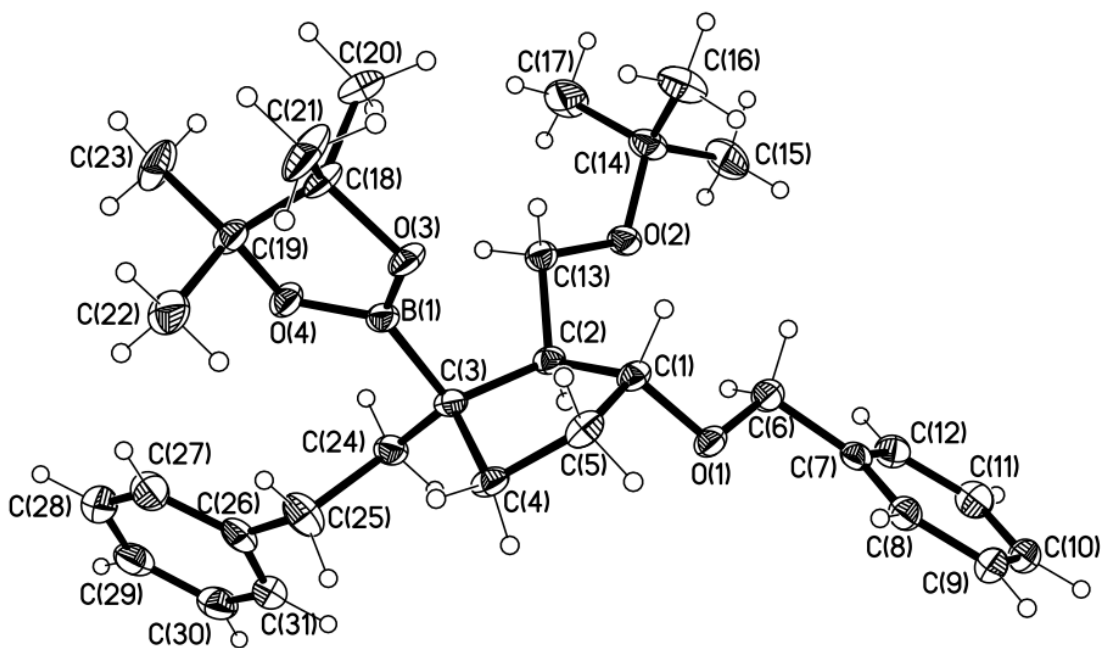



## VI. Total Synthesis of Natural Product Aphanamal

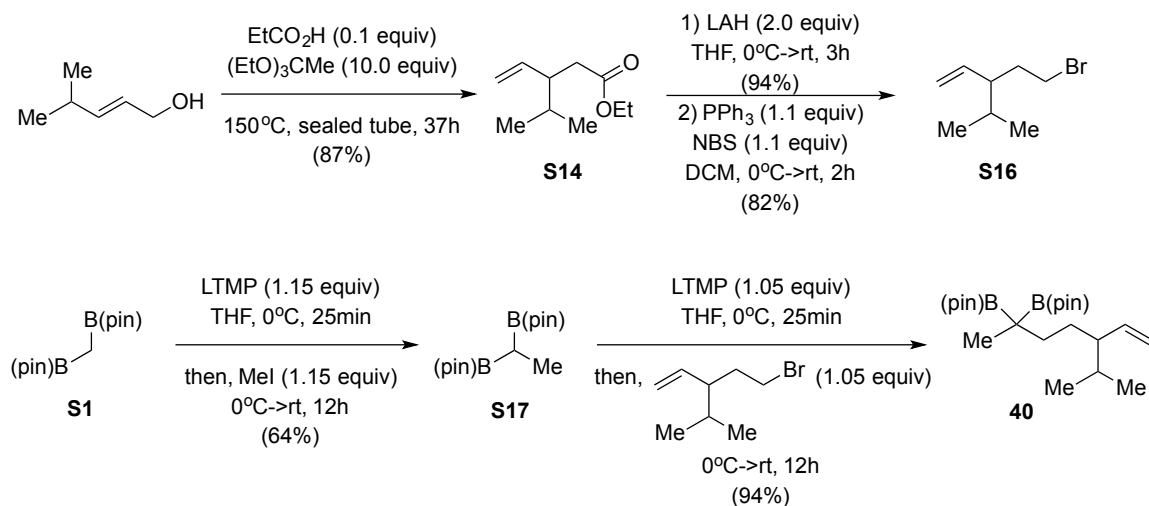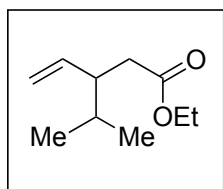

**Ethyl 3-isopropylpent-4-enoate (S14).** A flame dried 150 mL pressure vessel equipped with magnetic stir bar is charged with (*E*)-4-methylpent-2-en-1-ol<sup>9</sup> (3.17 g, 31.6 mmol, 1.0 equiv), triethyl orthoacetate (57.9 mL, 316 mmol, 10 equiv) and propionic acid (239  $\mu$ L, 3.20 mmol, 0.1 equiv) in succession. The vessel is sealed with a threaded, teflon cap and allowed to stir heated at 150°C for 1.5 days. At this point, the vessel and contents are cooled to 0°C and the excess triethyl orthoacetate consumed by combining the reaction mixture with 50 mL H<sub>2</sub>O, 50 mL THF and ca. 20 mg *p*-TsOH•H<sub>2</sub>O (this process is exothermic). Organics are then extracted 3x with Et<sub>2</sub>O and dried of Na<sub>2</sub>SO<sub>4</sub>. Concentration of solution yields clear, yellow oil with fruity fragrance (4.66 g, 27.4 mmol, 87%). No further purification necessary. <sup>1</sup>H NMR (600 MHz, CDCl<sub>3</sub>):  $\delta$  5.65 (ddd, *J* = 17.1, 10.4, 8.6 Hz, 1H), 5.05 – 4.98 (m, 2H), 4.10 (q, *J* = 7.1 Hz, 2H), 2.44 – 2.35 (m, 2H), 2.32 – 2.24 (m, 1H), 1.68 – 1.61 (m, 1H), 1.23 (t, *J* = 7.1 Hz, 3H), 0.90 (d, *J* = 6.8 Hz, 3H), 0.86 (d, *J* = 6.8 Hz, 3H); <sup>13</sup>C NMR (150 MHz, CDCl<sub>3</sub>):  $\delta$  172.94 (s), 138.76 (s), 115.97 (s), 60.15 (s), 46.71 (s), 37.49 (s), 31.29 (s), 20.25 (s), 18.79 (s), 14.25 (s); IR (neat): 2962.8 (m), 2876.7 (m), 1732.2 (s), 1465.7 (w), 1387.4 (w), 1265.6 (m), 1182.5 (m), 1142.6 (m), 1034.6 (w), 914.7 (s), 733.4 (s) cm<sup>-1</sup>; HRMS-(DART+) for <sup>12</sup>C<sub>10</sub><sup>1</sup>H<sub>19</sub><sup>16</sup>O<sub>2</sub> [M+H]<sup>+</sup>: calculated: 171.1385, found: 171.1379.

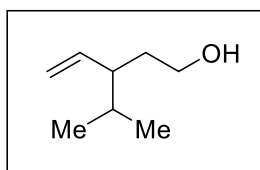

**3-isopropylpent-4-en-1-ol (S15).** A flame dried 500 mL round bottom equipped with magnetic stir bar is charged with LAH (1.60 g, 29.2 mmol, 2.0 equiv) inside an argon-filled glovebox. The vessel is sealed with a rubber septum and moved to the fume hood where it is brought to 0°C and charged with anhydrous THF (200 mL). A solution of **S14** (4.66 g, 27.4 mmol, 1.0 equiv) in anhydrous THF (15 mL) is then added to the reaction vessel

<sup>9</sup>For preparation see: Crimmins, M. T.; Al-awar, R. S.; Vallin, I. M.; Hollis, W. G., Jr.; O'Mahony, R.; Lever J. G.; Bankaitis-Davis, D. M. *J. Am. Chem. Soc.* **1996**, *118*, 7513

dropwise. The reaction mixture is then allowed to stir for 3h, slowly reaction room temperature. At this point, the vessel and contents are brought back to 0°C and the excess LAH carefully quenched with 1.6 mL H<sub>2</sub>O, 1.6 mL 3M NaOH and 4.8 mL H<sub>2</sub>O in succession. The grey slurry is then brought to rt and ca. 5 g Na<sub>2</sub>SO<sub>4</sub> added. This mixture is allowed to stir for 10 min then passed through a pad of celite, rinsing with Et<sub>2</sub>O. Concentration of the filtrate yields a clear, colorless oil (3.31 g, 25.8 mmol, 94%). No further purification necessary. <sup>1</sup>H NMR (600 MHz, CDCl<sub>3</sub>): δ 5.60 (ddd, *J* = 17.1, 10.2, 9.5 Hz, 1H), 5.04 (dd, *J* = 10.2, 2.1 Hz, 1H), 5.00 (ddd, *J* = 17.1, 2.1, 0.7 Hz, 1H), 3.67 (ddd, *J* = 10.7, 7.0, 5.5 Hz, 1H), 3.59 (dt, *J* = 10.6, 7.1 Hz, 1H), 1.97 – 1.90 (m, 1H), 1.75 – 1.68 (m, 1H), 1.63 – 1.54 (m, 1H), 1.54 – 1.46 (m, 1H), 1.41 (br s, 1H), 0.89 (d, *J* = 6.8 Hz, 3H), 0.84 (d, *J* = 6.8 Hz, 3H); <sup>13</sup>C NMR (151 MHz, CDCl<sub>3</sub>): δ 140.56 (s), 115.85 (s), 61.68 (s), 47.52 (s), 34.85 (s), 31.82 (s), 20.45 (s), 18.92 (s); IR (neat): 3325.1 (w, br), 2988.0 (m), 2870.1 (s), 1450.4 (w), 1391.6 (m), 1360.6 (w), 1295.9 (w), 1141.8 (s), 1073.6 (w), 911.4 (w), 734.3 (w) cm<sup>-1</sup>; HRMS-(DART+) for <sup>12</sup>C<sub>8</sub><sup>1</sup>H<sub>17</sub><sup>16</sup>O<sub>1</sub> [M+H]<sup>+</sup>: calculated: 129.1279, found: 129.1281.

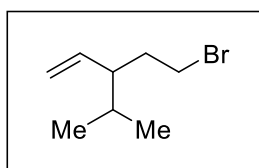

**5-bromo-3-isopropylpent-1-ene (S16).** A flame dried 100 mL round bottom equipped with magnetic stir bar is charged with PPh<sub>3</sub> (3.41 g, 12.7 mmol, 1.1 equiv) then sealed with a rubber septum. A solution of **S15** (1.47 g, 11.5 mmol, 1.0 equiv) in anhydrous DCM (11.5 mL) is then charged into the reaction vessel. The homogeneous mixture is allowed to stir at 0°C and the vessel temporarily opened to allow for the slow addition of solid NBS (2.25 g, 12.7 mmol, 1.1 equiv; this process is highly exothermic). Vessel is re-sealed and allowed to stir at rt for 3h, at which point it is concentrated *in vacuo* to render crude solid/oil mixture. Solid is suspended in Pentanes and loaded onto a SiO<sub>2</sub> column. The column is then eluted with 1% Et<sub>2</sub>O/Pentane, visualizing the product with KMnO<sub>4</sub>. Product isolated as clear, colorless oil (1.80 g, 9.42 mmol, 82%). <sup>1</sup>H NMR (600 MHz, CDCl<sub>3</sub>): δ 5.50 (ddd, *J* = 17.0, 10.3, 9.3 Hz, 1H), 5.09 (dd, *J* = 10.3, 2.1 Hz, 1H), 5.04 (dd, *J* = 17.1, 2.0 Hz, 1H), 3.45 (ddd, *J* = 9.6, 7.7, 4.6 Hz, 1H), 3.29 (m, 1H), 2.03 – 1.93 (m, 2H), 1.82 – 1.74 (m, 1H), 1.60 (m, 1H), 0.90 (d, *J* = 6.7 Hz, 3H), 0.86 (d, *J* = 6.8 Hz, 3H); <sup>13</sup>C NMR (150 MHz, CDCl<sub>3</sub>): δ 138.85 (s), 116.88 (s), 49.18 (s), 34.98 (s), 32.55 (s), 31.53 (s), 20.43 (s), 19.04 (s); IR (neat): 3076.2 (w), 2959.5 (s), 2929.7 (m), 2873.3 (m), 1638.1 (w), 1465.5 (w), 1368.8 (w), 1256.9 (m), 1212.1 (w), 999.3 (m), 917.4 (s), 639.5 (w), 568.5 (w) cm<sup>-1</sup>; HRMS-(DART+) for <sup>12</sup>C<sub>8</sub><sup>1</sup>H<sub>16</sub><sup>79</sup>Br<sub>1</sub> [M+H]<sup>+</sup>: calculated: 191.0435, found: 191.0438.

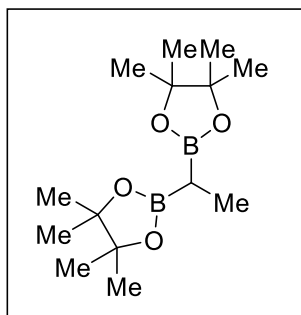

**2,2'-(ethane-1,1-diyl)bis(4,4,5,5-tetramethyl-1,3,2-dioxaborolane) (S17).** The reaction was performed according to *Representative Procedure (Method C)* with 1,1-diborylmethane (2.68 g, 10.0 mmol, 1.00 equiv), LTMP (1.69 g, 11.5 mmol, 1.15 equiv), Iodomethane (716 μL, 11.5 mmol, 1.15 equiv) and THF (40 mL). The crude reaction mixture was purified by column chromatography on silica gel (0% EtOAc/Hexanes, gradient to 6% EtOAc/Hexanes, visualized

with CAM stain) to afford a clear, colorless oil (1.80 g, 6.38 mmol, 64%).  $^1\text{H NMR}$  (500 MHz,  $\text{CDCl}_3$ ):  $\delta$  1.21 (s, 12H), 1.21 (s, 12H), 1.02 (d,  $J = 7.2$  Hz, 3H), 0.70 (q,  $J = 7.2$  Hz, 1H);  $^{13}\text{C NMR}$  (125 MHz,  $\text{CDCl}_3$ ):  $\delta$  82.86 (s), 24.80 (s), 24.50 (s), 9.02 (s);  $\text{IR}$  (neat): 2976.8 (w), 2934.5 (w), 2879.4 (w), 1460.5 (w), 1304.2 (s), 1268.8 (m), 1216.1 (w), 1142.1 (s), 1105.9 (m), 846.1 (m)  $\text{cm}^{-1}$ ;  $\text{HRMS}$ -(DART+) for  $^{12}\text{C}_{14}\text{H}_{29}\text{B}_2\text{O}_4$   $[\text{M}+\text{H}]^+$ : calculated: 283.2252, found: 283.2265.

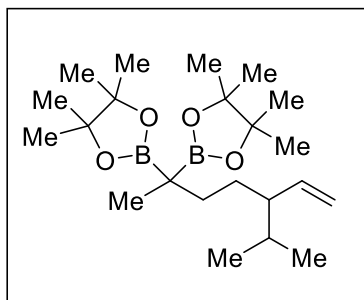

**2,2'-(5-isopropylhept-6-ene-2,2-diyl)bis(4,4,5,5-tetramethyl-1,3,2-dioxaborolane) (40).** The reaction was performed according to *Representative Procedure (Method D)* with diboronate ester **S17** (1.76 g, 6.24 mmol, 1.00 equiv), LTMP (964 mg, 6.55 mmol, 1.05 equiv), alkyl bromide **S16** (1.25 g, 6.55 mmol, 1.05 equiv) and THF (25 mL). The crude reaction mixture was purified by column chromatography on silica gel (1% EtOAc/Hexanes, gradient to 3% EtOAc/Hexanes,

visualized with CAM stain) to afford a clear, colorless oil (2.32 g, 5.92 mmol, 94%).  $^1\text{H NMR}$  (600 MHz,  $\text{CDCl}_3$ ):  $\delta$  5.56 (ddd,  $J = 17.0, 10.3, 9.0$  Hz, 1H), 4.97 (dd,  $J = 10.3, 2.3$  Hz, 1H), 4.92 (dd,  $J = 17.1, 2.3$  Hz, 1H), 1.78 – 1.69 (m, 1H), 1.60 (ddd,  $J = 13.6, 12.1, 6.8$  Hz, 1H), 1.55 – 1.41 (m, 2H), 1.42 – 1.33 (m, 1H), 1.28 – 1.22 (m, 1H), 1.22 – 1.18 (m, 24H), 1.03 (s, 3H), 0.84 (d,  $J = 6.7$  Hz, 3H), 0.79 (d,  $J = 6.9$  Hz, 3H).  $^{13}\text{C NMR}$  (150 MHz,  $\text{CDCl}_3$ ):  $\delta$  141.17 (s), 114.87 (s), 82.82 (s), 82.80 (s), 51.01 (s), 31.82 (s), 31.25 (s), 29.67 (s), 24.73 (s), 24.69 (s), 24.62 (s), 20.58 (s), 18.79 (s), 15.99 (s).  $\text{IR}$  (neat): 2976.3 (w), 2930.3 (w), 2869.8 (w), 1458.9 (w), 1298.5 (s), 1138.0 (s), 1080.9 (w), 968.3 (w), 848.9 (m), 668.7 (w)  $\text{cm}^{-1}$ ;  $\text{HRMS}$ -(DART+) for  $^{12}\text{C}_{22}\text{H}_{43}\text{B}_2\text{O}_4$   $[\text{M}+\text{H}]^+$ : calculated: 393.3347, found: 393.3358.

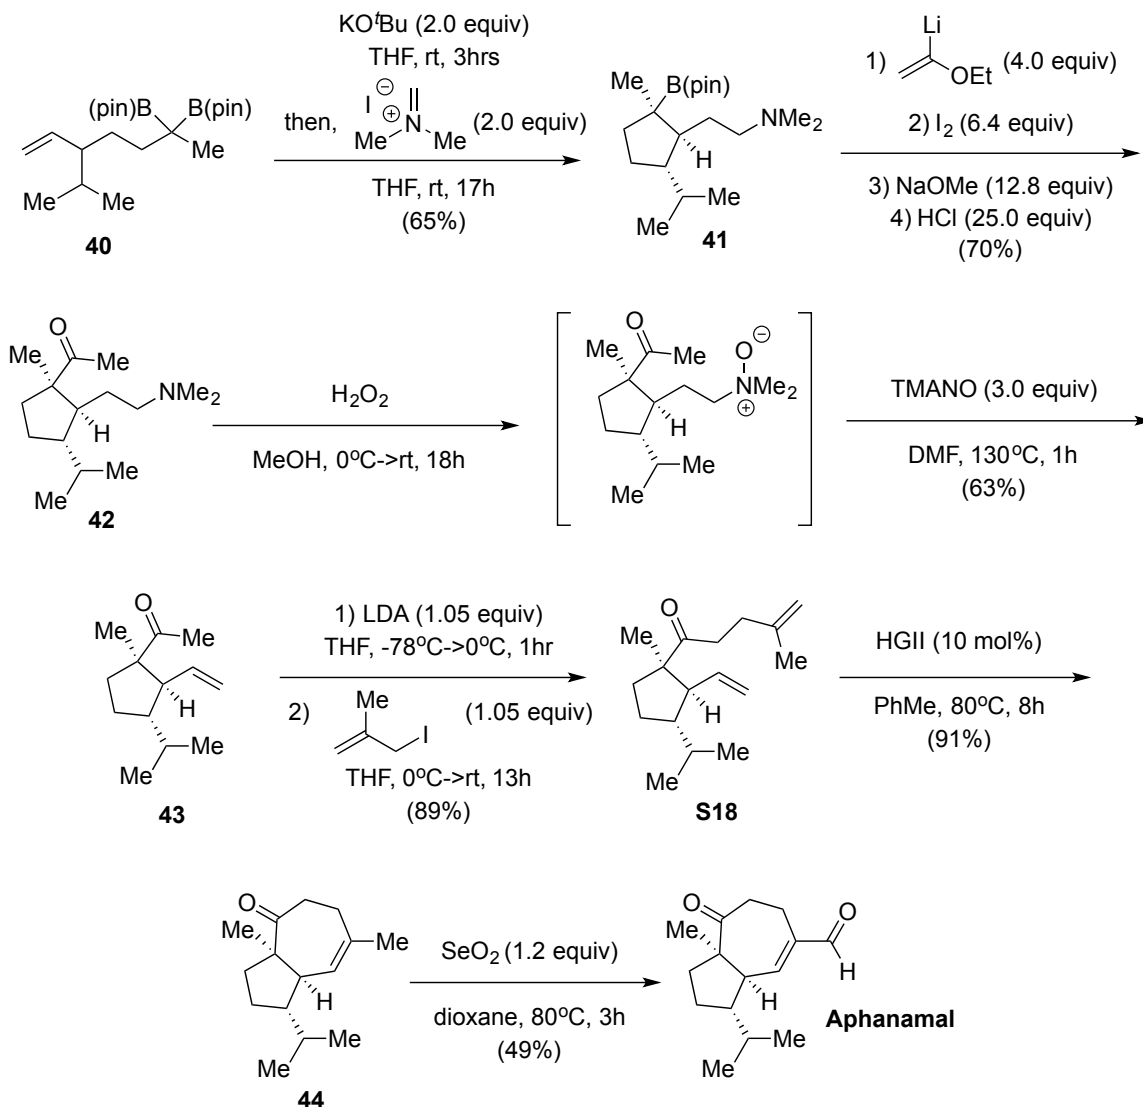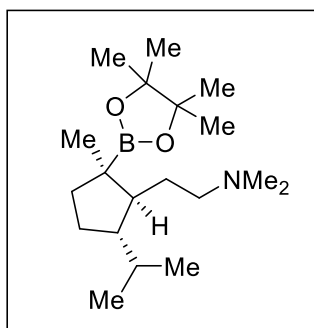

**2-((1S,2S,5S)-5-isopropyl-2-methyl-2-(4,4,5,5-tetramethyl-1,3,2-dioxaborolan-2-yl)cyclopentyl)-N,N-dimethylethan-1-amine (41).**

A flame-dried, 250mL round bottom equipped with magnetic stirbar is charged with **40** (2.97 g, 7.57 mmol) inside an Argon filled glovebox. A solution is then prepared with anhydrous THF (37.9 mL, 0.2 M). KO<sup>t</sup>Bu (1.70 g, 15.1 mmol, 2 equiv.) is then added to the solution neat, in one portion. The reaction mixture is allowed to stir for 3hrs inside the glovebox at room temperature and gradually becomes clear, pale yellow. At this point, freshly prepared Eschenmoser's Salt<sup>10</sup> (2.80 g, 15.1 mmol, 2 equiv.) is added neat, in one portion; white slurry results. The sealed reaction vessel is then brought to the fume hood where it is allowed to

<sup>10</sup> Eschenmoser, A.; Schreiber, J.; Maag, H.; Hashimoto, N. *Angew. Chem. Int. Ed.* **1971**, *10*, 330

stir for 17h at room temperature. Mixture is then diluted with reagent grade Et<sub>2</sub>O and passed through a pad of silica, rinsing with 50% EtOAc/1.5% NEt<sub>3</sub>/Hexanes. After concentration, <sup>1</sup>H NMR suggests ca. 7:1 epimeric ratio (presumably about the isopropyl group). SiO<sub>2</sub> chromatography performed (5% NEt<sub>3</sub>/Hexanes, then 5% NEt<sub>3</sub>/5% EtOAc/Hexanes), rendering product of acceptable purity as clear, colorless oil (**1.59 g, 4.92 mmol, 65%**). <sup>1</sup>H NMR (600 MHz, CDCl<sub>3</sub>): δ 2.30 – 2.24 (m, 2H), 2.20 (s, 6H), 1.79 – 1.71 (m, 1H), 1.70 – 1.60 (m, 4H), 1.58 – 1.48 (m, 1H), 1.40 – 1.32 (m, 1H), 1.21 (s, 12H), 1.19 – 1.08 (m, 2H), 1.01 (s, 3H), 0.89 (d, *J* = 6.7 Hz, 3H), 0.78 (d, *J* = 6.6 Hz, 3H). <sup>13</sup>C NMR (150 MHz, CDCl<sub>3</sub>): δ 82.60 (s), 59.82 (s), 52.54 (s), 51.78 (s), 45.55 (s), 37.69 (s), 31.97 (s), 30.01 (s), 24.87 (s), 24.82 (s), 24.79 (s), 24.76 (s), 22.71 (s), 16.93 (s). IR (neat): 2949.7 (br m), 2867.3 (w), 1460.8 (m), 1379.8 (s), 1369.2 (s), 1300.1 (s), 1142.2 (s), 856.5 (m), 693.4 (w) cm<sup>-1</sup>; HRMS-(DART+) for <sup>12</sup>C<sub>19</sub><sup>1</sup>H<sub>39</sub><sup>11</sup>B<sub>1</sub><sup>14</sup>N<sub>1</sub><sup>16</sup>O<sub>2</sub> [M+H]<sup>+</sup>: calculated: 324.3074, found: 324.3063.

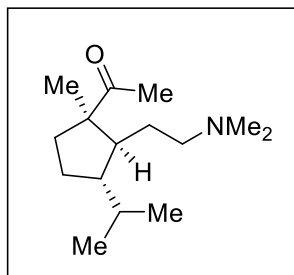

**1-((1R,2S,3S)-2-(2-(dimethylamino)ethyl)-3-isopropyl-1-methylcyclopentyl)ethan-1-one (42).** Adapted from published procedure.<sup>11</sup>

A flame-dried, 500mL round bottom equipped with magnetic stirbar is sealed then evacuated/refilled with Nitrogen gas 3x. The vessel is then charged with Ethyl vinyl ether (3.00 mL, 31.3 mmol, 6.4 equiv.) followed by 60 mL anhydrous THF. The solution is allowed to then stir at -78°C, and *t*-BuLi in Pentanes (11.5 mL, 1.7 M, 19.6 mmol, 4.0 equiv.) added across ca. 10min. The resulting mixture is a bright yellow solution. This solution is allowed to stir for 30min at -78°C, then the mixture brought to 0°C, where it is allowed to stir for an additional 30min (mixture becomes clear, colorless during the heating process and a black discoloration of the Teflon stirbar is noted). Mixture is cooled back to -78°C and a solution of **41** (1.58 g, 4.89 mmol, 1.0 equiv) in 60 mL anhydrous THF added across ca. 10min. The mixture is allowed to stir for 30min at -78°C, then brought to room temperature where it is allowed to stir for 5min (warming with a water bath). Mixture is again lowered to -78°C and a solution of I<sub>2</sub> in anhydrous THF (62.6 mL, 0.5 M, 31.3 mmol, 6.4 equiv.) added gradually across ca. 10min. The resulting deep purple mixture is allowed to stir for 30min at -78°C, then brought to room temperature where it is allowed to stir an additional 10min (warming with a water bath). Mixture is cooled back to -78°C and a solution of NaOMe in methanol (62.6 mL, 1.0 M, 62.6 mmol, 12.8 equiv.) is added gradually. The mixture is then allowed to stir overnight at room temperature. Upon return, the mixture is pale yellow. An aqueous solution of HCl is added gradually (122 mL, 1.0 M, 122 mmol, 25 equiv.). Mixture becomes orange. A saturated, aqueous solution of Na<sub>2</sub>S<sub>2</sub>O<sub>3</sub> then added (ca. 30 mL) and the mixture made basic with saturated, aqueous NaHCO<sub>3</sub>. Organics are then extracted 3x with Et<sub>2</sub>O and combined organics washed 2x with H<sub>2</sub>O and once with Brine. Organics dried over Na<sub>2</sub>SO<sub>4</sub> then concentrated to give crude oil. Crude oil purified by SiO<sub>2</sub> chromatography (10%

<sup>11</sup>Aggarwal, V. K.; Sonawane, R. P.; Jheengut, V.; Rabalakos, C.; Larouche-Gauthier, R.; Scott, H. K. *Angew. Chem. Int. Ed.* **2011**, *50*, 3760

EtOAc/pentane, then 25% EtOAc/pentane, then 10% EtOAc/5% NEt<sub>3</sub>/Pentane, then 25% EtOAc/5% NEt<sub>3</sub>/Pentane), visualizing with Cerium Ammonium Molybdate stain. Product isolated as pale yellow oil (**823 mg, 3.44 mmol, 70%**). <sup>1</sup>H NMR (600 MHz, CDCl<sub>3</sub>): δ 2.19 (t, *J* = 7.8 Hz, 2H), 2.16 (s, 6H), 2.13 (s, 3H), 2.03 – 1.95 (m, 1H), 1.77 – 1.58 (m, 3H), 1.55 – 1.48 (m, 1H), 1.48 – 1.31 (m, 4H), 1.21 (s, 3H), 0.91 (d, *J* = 6.7 Hz, 3H), 0.81 (d, *J* = 6.6 Hz, 3H). <sup>13</sup>C NMR (150 MHz, CDCl<sub>3</sub>): δ 213.22 (s), 58.80 (s), 58.71 (s), 52.19 (s), 50.52 (s), 45.47 (s), 35.69 (s), 31.09 (s), 30.28 (s), 28.24 (s), 25.27 (s), 24.97 (s), 22.65 (s), 17.64 (s). IR (neat): 2953.9 (br s), 2871.7 (m), 2763.9 (w), 1698.0 (s), 1461.2 (s), 1352.6 (m), 1041.4 (w) cm<sup>-1</sup>; HRMS-(DART+) for <sup>12</sup>C<sub>15</sub><sup>1</sup>H<sub>30</sub><sup>14</sup>N<sub>1</sub><sup>16</sup>O<sub>1</sub> [M+H]<sup>+</sup>: calculated: 240.2327, found: 240.2337.

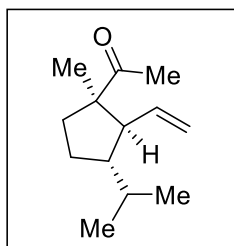

**1-((1R,2S,3S)-3-isopropyl-1-methyl-2-vinylcyclopentyl)ethan-1-one**

**(43)**. Adapted from published procedure.<sup>12</sup> A 50 mL round bottom equipped with magnetic stirbar is charged with **42** (823 mg, 3.44 mmol) and solution made with reagent grade MeOH (18.8 mL, 0.18 M). The reaction vessel and contents are brought to 0°C and aqueous H<sub>2</sub>O<sub>2</sub> (2.96 mL, ca. 30% w/w) added gradually. The mixture is allowed to stir overnight (19.5h), slowly reaching room temperature. Upon return,

excess H<sub>2</sub>O<sub>2</sub> is degraded by adding two spatula tips (ca. 50 mg) MnO<sub>2</sub> to mixture and stirring for 1h at room temperature (or until bubbling ceases). The mixture is then filtered through a pad of celite, rinsing with MeOH. Filtrate concentrated, then redissolved in DCM and dried over Na<sub>2</sub>SO<sub>4</sub>. Solution decanted then concentrated to yield crude, N-oxide intermediate as a yellow oil. A 40 mL vial containing N-oxide intermediate and magnetic stirbar is charged with TMANO dihydrate (1.15 g, 10.3 mmol, 3.0 equiv.). The vessel is then charged with 14.5 mL DMF (purchased as anhydrous from Acros, stored over sieves in sealed container with septum). Reaction vessel is sealed and set to stir at 130°C in preheated oil bath for 1h, where the mixture gradually becomes more yellow in color. Reaction removed from oil bath and allowed to cool to room temperature then poured into a separatory funnel and diluted with Et<sub>2</sub>O (ca. 50 mL). Organics washed 4x with ca. 10 mL H<sub>2</sub>O the once with Brine. Organics dried over Na<sub>2</sub>SO<sub>4</sub> then decanted and concentrated to yield yellow oil. Crude yellow oil is purified by SiO<sub>2</sub> chromatography (2% Et<sub>2</sub>O/pentane, visualized with KMnO<sub>4</sub> stain) to render product as pale yellow oil with pleasant, turpentine-like smell. (**425 mg, 2.19 mmol, 63%**). <sup>1</sup>H NMR (600 MHz, CDCl<sub>3</sub>): δ 5.57 (dt, *J* = 17.0, 10.0 Hz, 1H), 5.03 – 4.96 (m, 2H), 2.16 (m, 1H), 2.06 (s, 3H), 2.01 (m, 1H), 1.82 – 1.73 (m, 2H), 1.63 – 1.54 (m, 1H), 1.45 – 1.35 (m, 1H), 1.35 – 1.29 (m, 1H), 1.26 (s, 3H), 0.89 (d, *J* = 6.8 Hz, 3H), 0.80 (d, *J* = 6.7 Hz, 3H). <sup>13</sup>C NMR (150 MHz, CDCl<sub>3</sub>): δ 213.07 (s), 139.95 (s), 115.90 (s), 59.58 (s), 59.52 (s), 51.02 (s), 35.21 (s), 30.36 (s), 28.61 (s), 25.92 (s), 24.41 (s), 21.95 (s), 18.19 (s). IR (neat): 2956.8 (s), 2872.6 (m), 1700.7 (s), 1464.5 (m), 1352.7 (m), 1002.7 (w), 912.2 (m) cm<sup>-1</sup>; HRMS-(DART+) for <sup>12</sup>C<sub>13</sub><sup>1</sup>H<sub>23</sub><sup>16</sup>O<sub>1</sub> [M+H]<sup>+</sup>: calculated: 195.1749, found: 195.1750.

<sup>12</sup> White, J. D.; Ihle, D. C. *Org. Lett.* **2006**, *8*, 1081

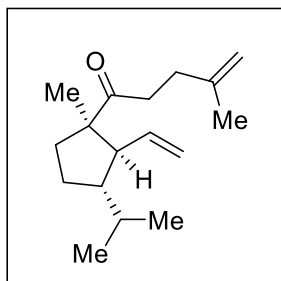

**1-((1R,2S,3S)-3-isopropyl-1-methyl-2-vinylcyclopentyl)-4-methylpent-4-en-1-one (S18).** A flamed dried 20 mL vial equipped with magnetic stirbar is sealed with rubber septum, then evacuated/refilled with N<sub>2</sub> 3x. LDA is prepared freshly in the vial at -78°C by slow addition of *n*BuLi in Hexanes (812 μL, 2.5 M, 1.05 equiv.) to a solution of diisopropyl amine (285 μL, 2.03 mmol, 1.05 equiv.) in 0.5 mL anhydrous THF. Mixture is allowed to stir for ca. 15min at -78°C then a solution of **43** (376 mg, 1.93 mmol, 1.0

equiv.) in 1.5 mL anhydrous THF added dropwise. Resulting mixture allowed to stir for 40min at -78°C then 20min at 0°C. At this point, freshly prepared, neat methyl iodide (218 μL, 2.03 mmol, 1.05 equiv.) charged in at once. Resulting mixture allowed to stir overnight (14h), slowly reaching room temperature. Upon return, mixture is quenched with ca. 1 mL H<sub>2</sub>O then extracted 3x with ca. 5 mL Et<sub>2</sub>O. Combined organics dried over Na<sub>2</sub>SO<sub>4</sub> then decanted and concentrated to render crude oil. Crude oil purified by SiO<sub>2</sub> chromatography (pentane, then 1% Et<sub>2</sub>O/pentane, visualized with KMnO<sub>4</sub>). Product isolated as clear, colorless oil (**428 mg, 1.73 mmol, 89%**). <sup>1</sup>H NMR (500 MHz, CDCl<sub>3</sub>): δ 5.54 (ddd, *J* = 17.3, 9.9 Hz, 9.9 Hz, 1H), 5.05 – 4.92 (m, 2H), 4.70 (s, 1H), 4.65 (s, 1H), 2.51 (t, *J* = 7.7 Hz, 2H), 2.31 – 2.07 (m, 3H), 2.02 (t, *J* = 9.1 Hz, 1H), 1.84 – 1.74 (m, 2H), 1.71 (s, 3H), 1.63 – 1.52 (m, 1H), 1.47 – 1.29 (m, 2H), 1.28 (s, 3H), 0.89 (d, *J* = 6.8 Hz, 3H), 0.81 (d, *J* = 6.7 Hz, 3H). <sup>13</sup>C NMR (125 MHz, CDCl<sub>3</sub>): δ 214.04 (s), 145.19 (s), 140.02 (s), 115.82 (s), 109.87 (s), 59.83 (s), 59.39 (s), 51.10 (s), 38.77 (s), 35.43 (s), 31.44 (s), 30.44 (s), 26.01 (s), 24.15 (s), 22.65 (s), 21.96 (s), 18.27 (s). IR (neat): 2956.4 (s), 2872.7 (m), 1700.0 (s), 1649.7 (w), 1459.4 (m), 1375.9 (w), 1003.2 (m), 911.3 (m), 887.0 (m) cm<sup>-1</sup>; HRMS-(DART+) for <sup>12</sup>C<sub>17</sub><sup>1</sup>H<sub>29</sub><sup>16</sup>O<sub>1</sub> [M+H]<sup>+</sup>: calculated: 249.2198, found: 249.2220.

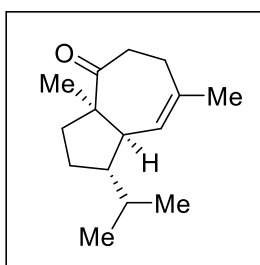

**(1S,3aR,8aR)-1-isopropyl-3a,7-dimethyl-2,3,3a,5,6,8a-hexahydroazulen-4(1H)-one (44).** A 25 mL, 2-neck round bottom is fixed with a stopcock side-arm and a reflux condenser. The vessel is equipped with a magnetic stirbar then the whole apparatus flame dried. Upon cooling to near room temperature, the vessel is charged with Hoveyda-Grubbs 2<sup>nd</sup> Generation (94 mg, 0.15 mmol, 10 mol%) then sealed and evacuated/refilled with N<sub>2</sub> 3x. A solution of **S18** (368 mg, 1.48 mmol,

1.0 equiv.) in 8.9 mL anhydrous toluene is then transferred to the reaction vessel. The green mixture is then set to stir at 80°C with a steady stream of N<sub>2</sub> blowing across the solution, from the side-arm out the reflux condenser (in order to remove forming ethylene from solution). Reaction is allowed to stir for 8.5h then cooled to room temperature. The reaction solution is then concentrated *in vacuo* and crude oil purified by SiO<sub>2</sub> chromatography (1% Et<sub>2</sub>O/Pentane, then 2.5% Et<sub>2</sub>O/Pentane, visualized with KMnO<sub>4</sub>). Clear, colorless oil results (**298 mg, 1.35 mmol, 91%**). <sup>1</sup>H NMR (600 MHz, CDCl<sub>3</sub>): δ 5.22 (d, *J* = 4.2 Hz, 1H), 2.74 (ddd, *J* = 14.6, 5.6, 4.0 Hz, 1H), 2.61 – 2.49 (m, 1H), 2.42 (ddd, *J* = 14.6, 12.0, 5.7 Hz, 1H), 2.27 – 2.18 (m, 1H), 2.09 – 1.98 (m, 2H), 1.79 – 1.73 (m, 1H), 1.71 (s, 3H), 1.61 (ddd, *J* = 14.7, 10.5, 7.4 Hz, 1H), 1.55 (dq, *J* = 13.6, 6.7 Hz, 1H), 1.38 – 1.26 (m, 2H), 1.22 (s, 3H), 0.90 (d, *J* = 6.6 Hz, 3H), 0.88 (d, *J* = 6.6 Hz,

3H).  $^{13}\text{C}$  NMR (150 MHz,  $\text{CDCl}_3$ ):  $\delta$  213.86 (s), 138.28 (s), 131.34 (s), 58.74 (s), 56.24 (s), 51.73 (s), 39.07 (s), 34.54 (s), 33.17 (s), 29.00 (s), 27.14 (s), 24.62 (s), 24.17 (s), 22.03 (s), 20.03 (s). IR (neat): 2953.7 (m), 2869.7 (m), 1698.7 (s), 1459.0 (w), 1446.4 (w), 1384.9 (w), 1072.2 (w), 1006.4 (w), 816.1 (w)  $\text{cm}^{-1}$ ; HRMS-(DART+) for  $^{12}\text{C}_{15}\text{H}_{25}\text{O}_1$   $[\text{M}+\text{H}]^+$ : calculated: 221.1905, found: 221.1904.

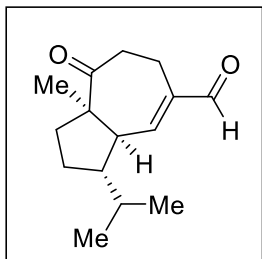

**(3S,3aR,8aR)-3-isopropyl-8a-methyl-8-oxo-1,2,3,3a,6,7,8,8a-octahydroazulene-5-carbaldehyde (Aphanamal).** A 20 mL vial containing **44** (294 mg, 1.33 mmol, 1.0 equiv.) was equipped with magnetic stirring bar and charged with  $\text{SeO}_2$  (177 mg, 1.6 mmol, 1.2 equiv.). The vial was then sealed with a rubber septum and evacuated/refilled with  $\text{N}_2$  3x. Anhydrous 1,4-dioxane (6.6 mL, 0.2 M) was then charged in and the resulting, heterogeneous mixture set to stir (ca. 800 rpm) at

$80^\circ\text{C}$  in a preheated oil bath. The mixture becomes clear, orange in appearance and homogeneous within 30min of heating. After stirring at  $80^\circ\text{C}$  for 3h, the mixture is cooled to room temperature then passed through a pad of  $\text{SiO}_2$ , rinsing with  $\text{Et}_2\text{O}$ . The filtrate is concentrated to render crude, orange oil.  $\text{SiO}_2$  chromatography performed (5%  $\text{Et}_2\text{O}$ /Pentane, gradient to 20%  $\text{Et}_2\text{O}$ /Pentane). Product isolated as yellow oil (**153 mg, 0.65 mmol, 49%**).  $^{13}\text{C}$  and  $^1\text{H}$  NMR spectra are in accord with published values.<sup>13</sup>  $^1\text{H}$  NMR (600 MHz,  $\text{CDCl}_3$ ):  $\delta$  9.33 (s, 1H), 6.62 (d,  $J = 5.3$  Hz, 1H), 2.80 – 2.75 (m, 1H), 2.73 – 2.67 (m, 1H), 2.52 (dd,  $J = 8.7, 5.4$  Hz, 1H), 2.51 – 2.46 (m, 1H), 2.45 – 2.39 (m, 1H), 2.24 – 2.15 (m, 1H), 1.88 – 1.76 (m, 2H), 1.64 (dq,  $J = 13.4, 6.7$  Hz, 1H), 1.47 – 1.36 (m, 2H), 1.31 (s, 3H), 0.92 (d,  $J = 6.7$  Hz, 6H).  $^{13}\text{C}$  NMR (150 MHz,  $\text{CDCl}_3$ ):  $\delta$  212.06 (s), 192.63 (s), 158.54 (s), 143.71 (s), 59.58 (s), 55.32 (s), 53.10 (s), 38.86 (s), 35.09 (s), 32.30 (s), 26.74 (s), 24.94 (s), 21.91 (s), 19.62 (s), 19.41 (s). IR (neat): 2957.2 (m), 2871.5 (w), 1683.9 (s), 1635.7 (w), 1459.1 (w), 1313.1 (w), 1173.5 (w), 793.5 (w)  $\text{cm}^{-1}$ ; HRMS-(DART+) for  $^{12}\text{C}_{15}\text{H}_{23}\text{O}_2$   $[\text{M}+\text{H}]^+$ : calculated: 235.1698, found: 235.1701.

<sup>13</sup> Moriyasu, M.; Takeuchi, S.; Ichimaru, M.; Nakatani, N.; Nishiyama, Y.; Kato, A.; Mathenge, S. G.; Juma, F. D.; Chalolmutiso, P. B. *J. Nat. Med.* **2012**, *66*, 453.



## VII. Mechanistic Studies

### 1. Radical Probe Experiment I

#### Procedure for Deborylative Alkylation Experiment:

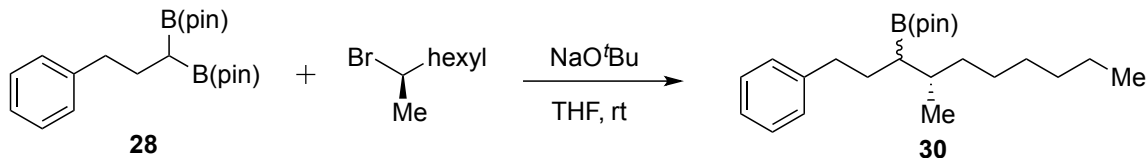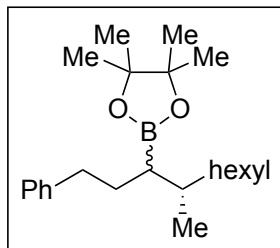

**4,4,5,5-tetramethyl-2-((4S)-4-methyl-1-phenyldecan-3-yl)-1,3,2-dioxaborolane (30).** In the glove box, an oven-dried 2-dram vial equipped with magnetic stir bar is charged with 1,1-diboronate ester **28** (96.8 mg, 0.26 mmol), NaO<sup>t</sup>Bu (50 mg, 0.52 mmol), and THF (1 mL). The reaction mixture was allowed to stir at room temperature for 15 min, followed by the addition of (*R*)-2-bromooctane (35.1  $\mu$ L, 0.20 mmol). The vial was sealed with a polypropylene cap, removed

from the glove box, and was allowed to stir at room temperature for overnight. Upon completion, the reaction mixture was diluted with diethyl ether (2 mL), filtered through a silica gel plug, rinsed with diethyl ether, and concentrated *in vacuo*. The crude reaction mixture was purified on silica gel (hexanes: ethyl acetate = 100:1 to 50:1) to isolate the desired product (35 mg, 49%, 1.1:1 d.r. 98:2 er)(diastereoselectivity was determined based on NMR integration after oxidation). **<sup>1</sup>H NMR** (600 MHz, CDCl<sub>3</sub>):  $\delta$  7.28 – 7.26 (m, 3H), 7.21 – 7.13 (m, 2H), 2.72 – 2.57 (m, 1H), 2.57 – 2.43 (m, 1H), 1.87 – 1.68 (m, 1H), 1.68 – 1.56 (m, 2H), 1.43 – 1.33 (m, 1H), 1.32 – 1.19 (m, 8 H, overlap), 1.27 (s, 12H), 1.18 – 1.07 (m, 1H), 1.04 – 0.98 (m, 1H), 0.93 – 0.84 (m, 6H); **<sup>13</sup>C NMR** (125 MHz, CDCl<sub>3</sub>):  $\delta$  143.26, 128.36, 128.17, 125.48, 82.83, 36.42, 36.15, 36.09, 35.91, 34.62, 34.38, 31.89, 31.51, 30.20, 29.58, 29.56, 27.52, 27.25, 25.08, 25.06, 24.79, 22.64, 18.75, 18.44, 14.09; **IR** (neat): 2956.5 (m), 2926.9 (s), 2856.3 (m), 1729.6 (w), 1456.9 (w), 1379.1 (m), 1313.8 (m), 1270.7 (w), 1143.9 (s), 699.1 (m) cm<sup>-1</sup>; **HRMS**-(DART+) for <sup>12</sup>C<sub>23</sub><sup>1</sup>H<sub>40</sub><sup>11</sup>B<sub>1</sub><sup>16</sup>O<sub>2</sub> [M+H]<sup>+</sup>: calculated: 359.3121, found: 359.3139.

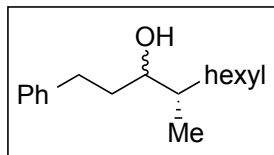

**(4S)-4-methyl-1-phenyldecan-3-ol (S19).** To a 20 mL vial containing the compound **30** and THF (1 mL), aqueous NaOH (0.6 mL, 3 M, 1.8 mmol) is added then the vial is cooled 0 °C. Aqueous Hydrogen Peroxide (0.3 mL, 30% in H<sub>2</sub>O) is then slowly added to the reaction vessel and reaction allowed to stir overnight. Upon return, the vessel is

cooled back to 0 °C and quenched slowly with saturated, aqueous Na<sub>2</sub>S<sub>2</sub>O<sub>3</sub> (1 mL), stirred for 30 minutes, then extracted with diethyl ether. Combined extracts are then dried over Na<sub>2</sub>SO<sub>4</sub> and concentrated *in vacuo*. The crude residue is then purified by column chromatography on silica gel. **<sup>1</sup>H NMR** (600 MHz, CDCl<sub>3</sub>):  $\delta$  7.32 – 7.27 (m, 4H), 7.24 – 7.16 (m, 6H), 3.54 (dt, *J* = 10.6, 5.5 Hz, 1H), 3.48 (dtd, *J* = 9.8, 5.1, 2.9 Hz, 1H), 2.95 – 2.78 (m, 2H), 2.73 – 2.59 (m, 2H), 1.84 – 1.73 (m, 4H), 1.57 – 1.47 (m, 2H), 1.46 – 1.38 (m, 2H), 1.38 – 1.22 (m, 17H), 1.21 – 1.14 (m, 2H), 1.14 – 1.05 (m, 1H), 0.95 – 0.84 (m, 12H); **<sup>13</sup>C NMR** (150 MHz, CDCl<sub>3</sub>):  $\delta$  142.36, 142.31,

128.42, 128.36, 125.76, 75.44, 74.72, 39.01, 38.45, 36.26, 35.19, 33.23, 32.69, 32.56, 31.92, 31.84, 29.69, 29.60, 29.58, 27.31, 27.25, 22.65, 15.20, 14.08, 13.69; IR (neat): 3357.0 (w), 2956.7 (m), 2927.8 (s), 2855.0 (m), 1724.7 (m), 1455.3 (w), 1275.3 (w), 1131.9 (w), 751.2 (m), 698.4 (m)  $\text{cm}^{-1}$ ; HRMS-(DART+) for  $^{12}\text{C}_{17}^{1}\text{H}_{27}$   $[\text{M}+\text{H}-\text{H}_2\text{O}]^+$ : calculated: 231.2113, found: 231.2118.

### ***Proof of Stereochemistry:***

The same title compound was prepared from Evans Alkylation as shown below:

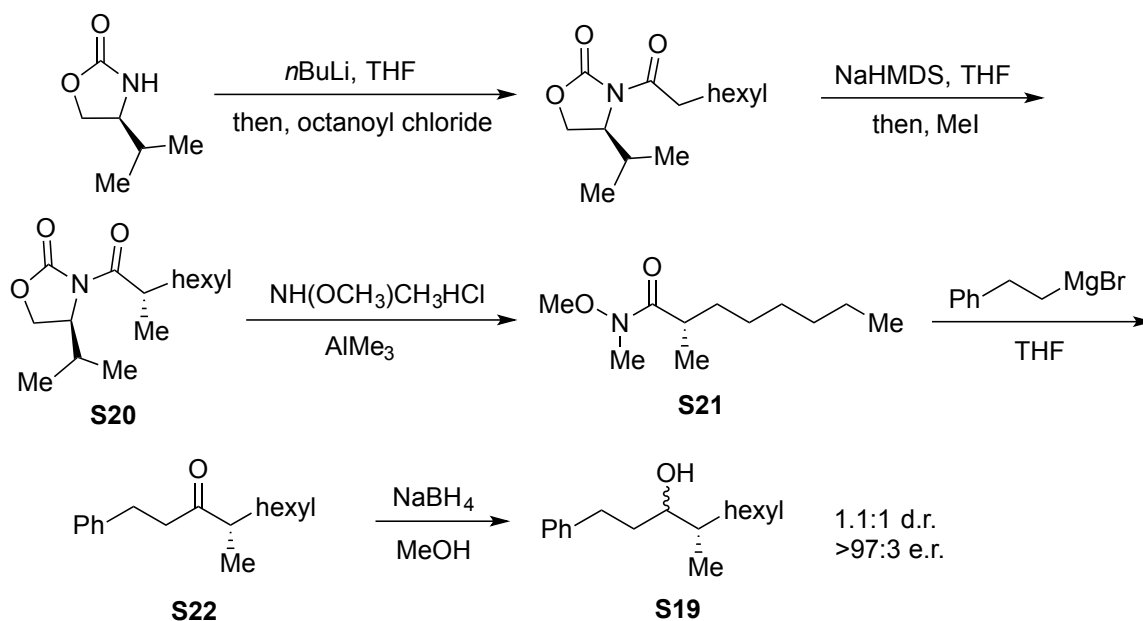

(*R*)-4-isopropyl-3-((*S*)-2-methyloctanoyl)oxazolidin-2-one (**S20**) prepared according to the literature procedure.<sup>14</sup> The product is obtained as a colorless oil (78%, d.r. = 88:12). The NMR spectra are in accord with previously reported data.<sup>15</sup> Preparation of (*S*)-*N*-methoxy-*N*,2-dimethyloctanamide **S21** adapted from literature procedure.<sup>16</sup> To a stirred solution of *N,O*-Dimethylhydroxylamine hydrochloride (312.1 mg, 3.2 mmol) in  $\text{CH}_2\text{Cl}_2$  (5 ml) at 0 °C, neat  $\text{AlMe}_3$  (307  $\mu\text{L}$ , 3.2 mmol) is carefully added. The reaction mixture is stirred at 0 °C for 10 min and then one hour at room temperature. The mixture is then cooled back to 0 °C and a solution of oxazolidone **S20** (227 mg, 0.8 mmol) in  $\text{CH}_2\text{Cl}_2$  (5 ml) is added to the reaction vessel. The resulting mixture is then allowed to stir overnight, gradually reaching room temperature. Upon return, the reaction solution is diluted with  $\text{CH}_2\text{Cl}_2$  (10 mL) and poured into a separatory funnel containing ice-cold aqueous 0.5 N HCl (25 ml) and organics are extracted 3x with  $\text{CH}_2\text{Cl}_2$ . The combined extracts are then washed with saturated, aqueous  $\text{NaHCO}_3$  and saturated, aqueous

<sup>14</sup> Evans, D. A.; Ennis, M. D.; Le, T. *J. Am. Chem. Soc.* **1984**, *106*, 1155

<sup>15</sup> Minko, Y.; Pasco, M.; Lercher, L.; Botoshansky, M.; Marek, I. *Nature* **2012**, *490*, 522

<sup>16</sup> Micalizio, G. C.; Pinchuk, A. N.; Roush, W. R. *J. Org. Chem.* **2000**, *65*, 8730

NaCl, in succession, then dried over Na<sub>2</sub>SO<sub>4</sub>. Volatiles are then removed *in vacuo* and the crude, colorless oil is then purified by silica gel chromatography (8:2 pentane/Et<sub>2</sub>O, gradient to 7:3 pentane/Et<sub>2</sub>O) to afford (*S*)-*N*-methoxy-*N*,2-dimethyloctanamide **S21** as a colorless oil (38.2 mg, 22 %).

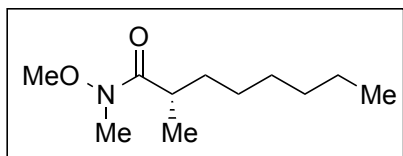

**(*S*)-*N*-methoxy-*N*,2-dimethyloctanamide (**S21**).** <sup>1</sup>H NMR (500 MHz, CDCl<sub>3</sub>): δ 3.68 (s, 3H), 3.19 (s, 3H), 2.86 (s, 1H), 1.67 (ddd, *J* = 13.2, 8.3, 5.3 Hz, 1H), 1.32 – 1.18 (m, 9H), 1.11 (d, *J* = 6.8 Hz, 3H), 0.87 (t, *J* = 7.0 Hz, 3H); <sup>13</sup>C NMR (125 MHz, CDCl<sub>3</sub>): δ 61.40, 35.09, 33.83, 31.73, 29.68, 29.31, 27.50, 22.61, 17.45, 14.04; IR (neat): 2964.0 (m), 2930.4 (m), 2871.7 (m), 1779.3 (s), 1699.3 (m), 1385.5 (m), 1300.8 (w), 1204.9 (m), 1141.6 (m), 911.6 (w), 733.4 (m) cm<sup>-1</sup>; HRMS-(DART+) for <sup>12</sup>C<sub>11</sub><sup>1</sup>H<sub>24</sub><sup>14</sup>N<sub>1</sub><sup>16</sup>O<sub>2</sub> [M+H]<sup>+</sup>: calculated: 202.1807, found: 202.1797.

To a dried flask fitted with magnetic stir bar and charged with Mg<sup>0</sup> (36.5 mg, 1.5 mmol) and anhydrous THF (5 mL), (2-bromoethyl)benzene (0.17 mL, 1.25 mmol) is added slowly under N<sub>2</sub>. Mixture is then stirred at 60 °C for two hours and the resulting Grignard solution is cooled back to room temperature where it is added to a solution of amide **S21** (38.2 mg, 0.177 mmol) in anhydrous THF (1 mL) drop wise at 0 °C. The reaction mixture is allowed to stir for 3h, gradually warming to room temperature. Upon completion, reaction is cooled to 0 °C and quenched with saturated, aqueous NH<sub>4</sub>Cl (1 mL). Organics are then extracted with diethyl ether (3 × 3 mL) and the combined extracts washed with brine and dried over anhydrous Na<sub>2</sub>SO<sub>4</sub>. Volatiles are then removed *in vacuo* and the crude residue was purified on silica gel (hexane: ethyl acetate= 100:1, gradient to 20:1) to afford compound **S22** as an colorless oil (34 mg, 78%).

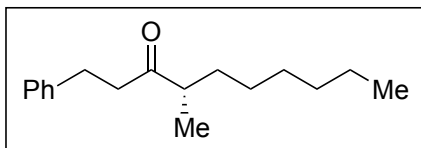

**(*S*)-4-methyl-1-phenyldecan-3-one (**S22**).** <sup>1</sup>H NMR (500 MHz, CDCl<sub>3</sub>): δ 7.32 – 7.26 (m, 2H), 7.21 – 7.16 (m, 3H), 2.89 (t, *J* = 7.6 Hz, 2H), 2.78 – 2.70 (m, 2H), 2.48 (h, *J* = 6.9 Hz, 1H), 1.65 – 1.56 (m, 1H), 1.35 – 1.12 (m, 9H), 1.03 (d, *J* = 6.9 Hz, 3H), 0.87 (t, *J* = 7.0 Hz, 3H); <sup>13</sup>C NMR (125 MHz, CDCl<sub>3</sub>): δ 213.81, 141.35, 128.41, 128.33, 126.00, 46.54, 42.65, 32.94, 31.63, 29.74, 29.30, 27.18, 22.56, 16.16, 14.03; IR (neat): 2958.0 (s), 2928.3 (s), 2858.2 (m), 1728.0 (s), 1462.1 (m), 1272.6 (s), 1122.5 (m), 1072.6 (m), 744.7 (w), 699.4 (w) cm<sup>-1</sup>; HRMS-(DART+) for <sup>12</sup>C<sub>17</sub><sup>1</sup>H<sub>27</sub><sup>16</sup>O<sub>1</sub> [M+H]<sup>+</sup>: calculated: 247.2062, found: 247.2053.

To a vial containing a solution of (*S*)-4-methyl-1-phenyldecan-3-one **S22** (34 mg, 0.14 mmol) in MeOH (1 mL), NaBH<sub>4</sub> (10.6 mg, 0.28 mmol) is added at 0 °C. The reaction mixture is then allowed to stir for 20 min at room temperature, then quenched with saturated aqueous NH<sub>4</sub>Cl (1 mL). Organics are then extracted with diethyl ether (3 × 3 mL) and the combined organic layers washed with brine and dried over anhydrous Na<sub>2</sub>SO<sub>4</sub>. Volatiles are then removed *in vacuo* and the crude residue purified on silica gel (hexane: ethyl acetate = 10:1) to yield

(4*S*)-4-methyl-1-phenyldecan-3-ol **S19** as a colorless oil (32 mg, 92%, 1.1:1 d.r., 97:3 er). (diastereoselectivity was determined based on NMR integration). The spectra data is the same as shown above.

### Analysis of Stereochemistry

The enantioselectivity was determined by SFC analysis of the reaction product shown below. SFC trace of base promoted deborylative alkylation product compound **30** (after oxidation):

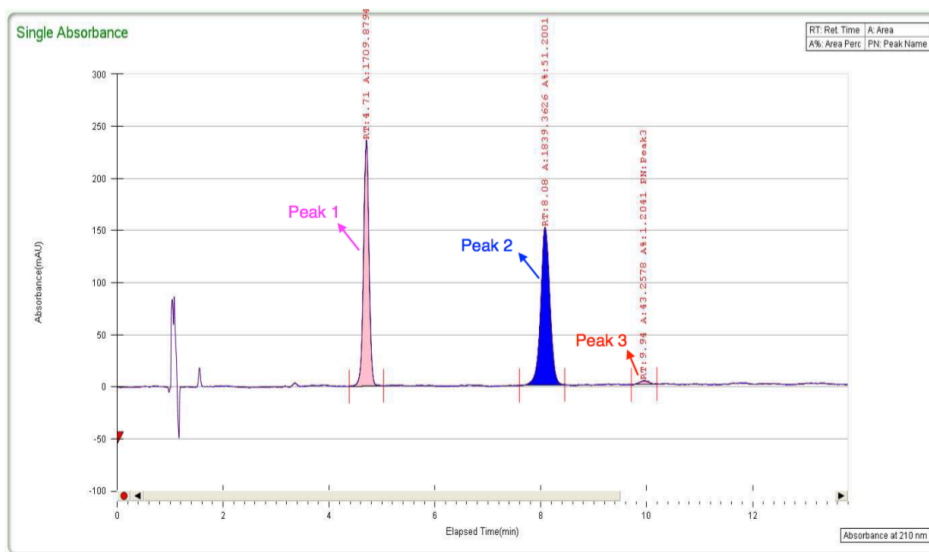

#### General Info

Log Author  
 Log Date 9/13/2015 6:29:58 PM  
 Report By current\_User  
 Report Date 4/10/2017  
 Method Name potterbo.met  
 Notes OD-H, 100 bar, 10% IPA, 3 mL/min, 35 deg C

#### Injection Info

Inj Vol 10  
 Solvent IPA  
 Column OD-H  
 Sample xl-4-098-fineagain  
 Well location P1: 1A

Temp 34.8  
 Flow 3  
 % Modifier 10  
 Pressure 100

#### Peak Info

| Peak No | % Area  | Area      | RT (min) | Height (mV) | K'     |
|---------|---------|-----------|----------|-------------|--------|
| 1       | 47.5958 | 1709.8794 | 4.71     | 236.3671    | 0.0042 |
| 2       | 51.2001 | 1839.3626 | 8.08     | 151.5557    | 0.0073 |
| 3       | 1.2041  | 43.2578   | 9.94     | 3.6284      | 0.009  |
| Total:  | 100     | 3592.4998 |          |             |        |

$$\begin{aligned} \text{Diastereoselectivity} &= \text{Area of Peak 1} / \text{Area of (Peak 2 + Peak 3)} \\ &= 1709.8794 / (1839.3626 + 43.2578) \\ &= 1/1.1 \end{aligned}$$

$$\begin{aligned} \text{Enantioselectivity} &= \text{Area of (Peak 2 - Peak 3)} / \text{Area of (Peak 2 + Peak 3)} \\ &= (1839.3626 - 43.2578) / (1839.3626 + 43.2578) \\ &= 95 \% \end{aligned}$$

SFC trace of authentic product prepared from Evans alkylation compound S19:

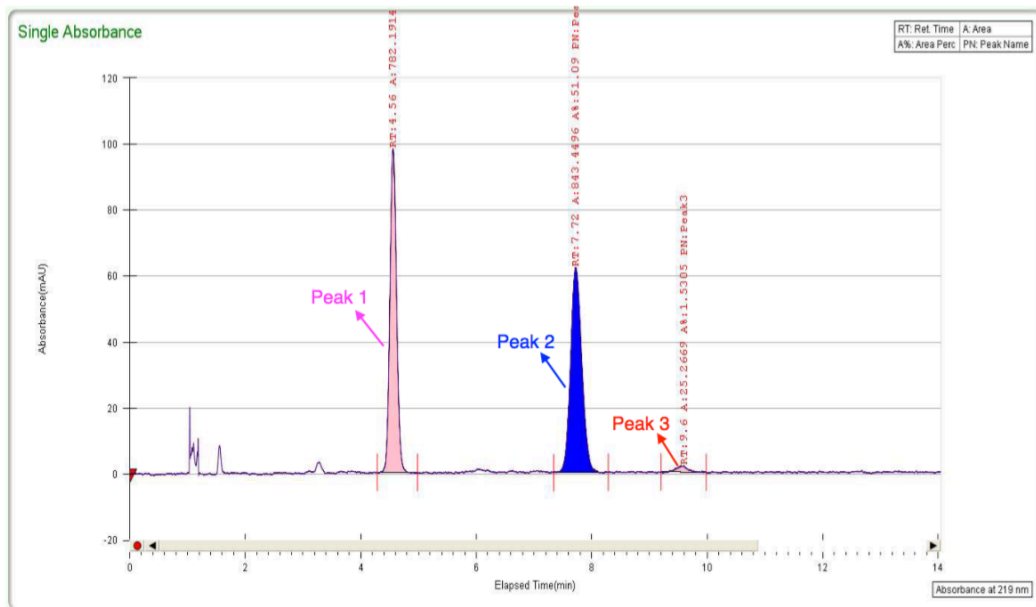

**General Info**

Log Author  
 Log Date 10/19/2015 5:12:06 PM  
 Report By current\_User  
 Report Date 4/10/2017  
 Method Name potterbo.met  
 Notes ODH, 100 bar, 10% iPA, 3 mL/min, 35 deg C

**Injection Info**

Inj Vol 10  
 Solvent IPA  
 Column OD-H  
 Sample x1-4-271-finediluteagain  
 Well location P1: 3A  
 Temp 35  
 Flow 3  
 % Modifier 10  
 Pressure 101

**Peak Info**

| Peak No | % Area  | Area      | RT (min) | Height (mV) | K'     |
|---------|---------|-----------|----------|-------------|--------|
| 1       | 47.3795 | 782.1914  | 4.56     | 97.939      | 0.0044 |
| 2       | 51.09   | 843.4496  | 7.72     | 62.1709     | 0.0075 |
| 3       | 1.5305  | 25.2669   | 9.6      | 1.8841      | 0.0093 |
| Total:  | 100     | 1650.9079 |          |             |        |

$$\begin{aligned} \text{Diastereoselectivity} &= \text{Area of Peak 1} / \text{Area of (Peak 2 + Peak 3)} \\ &= 782.1914 / (843.4496 + 25.2669) \\ &= 1/1.1 \end{aligned}$$

$$\begin{aligned} \text{Enantioselectivity} &= \text{Area of (Peak 2 - Peak 3)} / \text{Area of (Peak 2 + Peak 3)} \\ &= (843.4496 - 25.2669) / (843.4496 + 25.2669) \\ &= 94 \% \end{aligned}$$

## 2. Radical Probe Experiment II

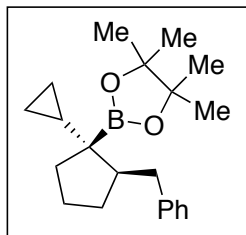

**2-((1R,2R)-2-benzyl-1-cyclopropylcyclopentyl)-4,4,5,5-tetramethyl-1,3,2-dioxaborolane (32).** The reaction was performed according to *Representative Procedure for Deborylative cyclization* with diboronate ester **31** (45.2 mg, 0.1 mmol), KO*t*-Bu (22.4 mg, 0.2 mmol), and THF (0.5 mL) for 6 hours. The crude reaction mixture was purified by column chromatography on silica gel (100:0.8 hexanes/ethyl acetate, stain in CAM) to afford a colorless oil (15 mg, 46 %, d.r. > 20:1, crude NMR shows the same diastereoselectivity).  $^1\text{H NMR}$  (500 MHz,  $\text{CDCl}_3$ ):  $\delta$  7.29 – 7.22 (m, 2H), 7.24 – 7.12 (m, 3H), 3.07 (dd,  $J = 13.2, 3.5$  Hz, 1H), 2.43 (dd,  $J = 13.2, 11.7$  Hz, 1H), 1.87 (tdd,  $J = 9.0, 6.6, 3.5$  Hz, 1H), 1.76 – 1.62 (m, 1H), 1.66 – 1.57 (m, 2H), 1.52 – 1.40 (m, 1H), 1.35 – 1.19 (m, 1H), 1.26 (s, 12H), 1.15 – 1.02 (m, 1H), 0.86 (ddt,  $J = 11.3, 8.6, 3.7$  Hz, 1H), 0.44 – 0.26 (m, 1H);  $^{13}\text{C NMR}$  (125 MHz,  $\text{CDCl}_3$ ):  $\delta$  143.17, 128.89, 128.04, 125.35, 82.84, 52.53, 39.16, 30.96, 30.57, 24.92, 24.83, 22.42, 16.75, 2.07, 0.29;  $\text{IR}$  (neat): 2976.4 (w), 2954.8 (w), 2866.4 (w), 1495.0 (w), 1387.8 (m), 1299.9 (m), 1214.2 (w), 1141.6 (s), 1013.6 (w), 967.5 (w), 862.4 (w), 744.8 (w), 699.3 (m)  $\text{cm}^{-1}$ ;  $\text{HRMS}$ -(DART+) for  $^{12}\text{C}_{21}\text{H}_{32}^{11}\text{B}_1^{16}\text{O}_2$   $[\text{M}+\text{H}]^+$ : calculated: 327.2495, found: 327.2492.

## 3. $^2\text{D}$ -Labeled Experiment

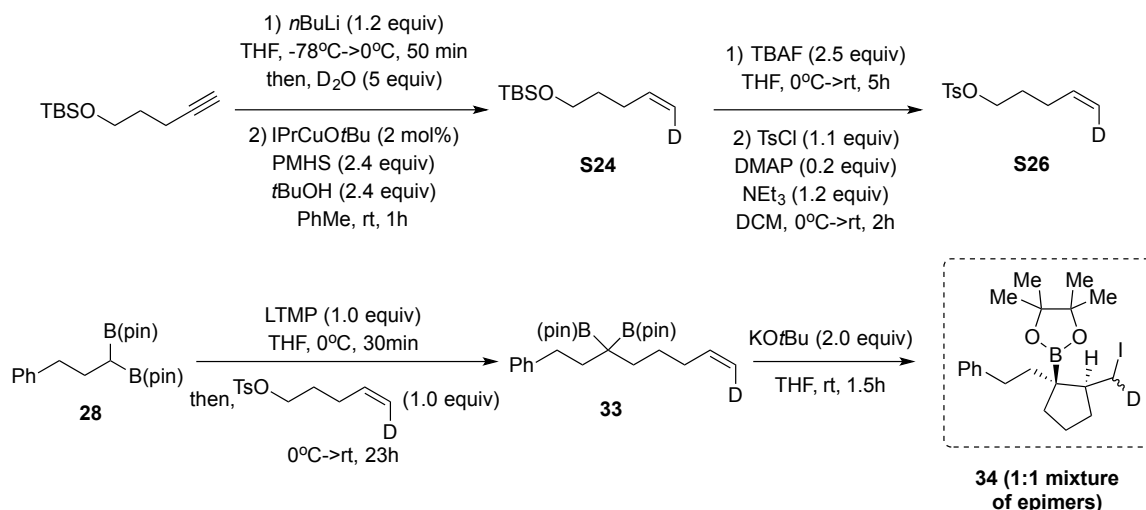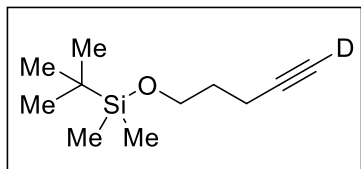

**tert-butyldimethyl((pent-4-yn-1-yl-5-*d*)oxy)silane (S23).** A flame dried 20 mL vial equipped with stir bar is charged with *tert*-butyldimethyl(pent-4-yn-1-yloxy)silane (1.87 g, 9.43 mmol, 1.0 equiv), then sealed and evacuated/backfilled with  $\text{N}_2$  3x. Anhydrous THF (9.4 mL) is then charged in the vessel and the clear colorless solution set to stir at  $-78^\circ\text{C}$ . A solution of *n*BuLi in Hexanes (4.20 mL, 2.70 M, 11.3 mmol, 1.2 equiv) is then added dropwise, resulting in a clear, yellow solution. After stirring for 30min at  $-78^\circ\text{C}$ , the mixture is brought to  $0^\circ\text{C}$  and allowed to stir an additional 20min.

At this point, the reaction is quenched by slow addition of D<sub>2</sub>O (853 μL, 47.2 mmol, 5.0 equiv), resulting in a white slurry. The resulting mixture is allowed to stir for 4h, then directly dried over Na<sub>2</sub>SO<sub>4</sub> and passed through a pad of SiO<sub>2</sub>, rinsing with Et<sub>2</sub>O. Filtrate is then concentration to yield clear, colorless oil (1.88 g, 9.43 mmol, quantitative). No further purification necessary. <sup>1</sup>H NMR (500 MHz, CDCl<sub>3</sub>): δ 3.70 (t, *J* = 6.0 Hz, 2H), 2.27 (t, *J* = 7.1 Hz, 2H), 1.78 – 1.68 (m, 2H), 0.89 (s, 9H), 0.06 (s, 6H); <sup>13</sup>C NMR (125 MHz, CDCl<sub>3</sub>): δ 61.41, 31.51, 25.90, 18.29, 14.79, -5.39; IR (neat): 2988.3 (s), 2946.7 (w), 2870.2 (s), 1393.6 (w), 1142.5 (s) cm<sup>-1</sup>; HRMS-(DART+) for <sup>12</sup>C<sub>11</sub><sup>1</sup>H<sub>22</sub><sup>2</sup>D<sub>1</sub><sup>29</sup>Si<sub>1</sub><sup>16</sup>O<sub>1</sub> [M+H]<sup>+</sup>: calculated: 200.1581, found: 200.1572.

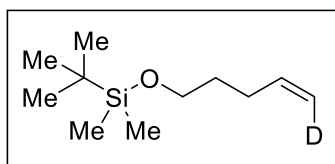

**(Z)-tert-butyltrimethylsilyloxy-1-pentene (S24).**

Adapted from published procedure.<sup>17</sup> A flame dried 250 mL round bottom equipped with magnetic stir bar is charged with **S23** (1.43 g, 7.2 mmol, 1.0 equiv) inside an argon-filled glovebox. *t*BuOH (990 mg, 13.4 mmol, 2.4 equiv) is then added to the vessel, followed by toluene (60 mL) then Polymethylhydrosiloxane (979 μL, 17.3 mmol (monomer), 2.4 equiv). The mixture is set to stir, then IPrCuO*t*Bu<sup>18</sup> (75.6 mg, 0.14 mmol, 2 mol%) is added, at which point bubbling is observed. The vessel is sealed with a rubber septum, then moved to the fume hood where it is allowed to stir for 1h at room temperature. At this point, the reaction mixture turns dark brown and it is passed through a pad of silica gel, rinsing with Et<sub>2</sub>O. The filtrate is concentrated then SiO<sub>2</sub> chromatography performed (0% Et<sub>2</sub>O/Pentanes, gradient to 2.5% Et<sub>2</sub>O/Pentanes, visualizing with KMnO<sub>4</sub>). Product coelutes with PMHS and yield is carried across two steps. <sup>1</sup>H NMR (600 MHz, CDCl<sub>3</sub>) δ 5.85 – 5.77 (m, 1H), 4.94 (d, *J* = 10.2 Hz, 1H), 3.62 (t, *J* = 6.5 Hz, 2H), 2.10 (td, *J* = 7.6, 0.9 Hz, 2H), 1.64 – 1.58 (m, 2H), 0.90 (s, 9H), 0.05 (s, 6H); <sup>13</sup>C NMR (150 MHz, CDCl<sub>3</sub>): 138.45 (s), 114.19 (t, *J* = 23.5 Hz), 62.53 (s), 31.99 (s), 29.97 (s), 25.95 (s), 18.34 (s), -5.30 (s); IR (neat): 2987.3 (m), 2871.0 (m), 1142.4 (s) cm<sup>-1</sup>; HRMS-(DART+) for <sup>12</sup>C<sub>11</sub><sup>1</sup>H<sub>24</sub><sup>2</sup>D<sub>1</sub><sup>29</sup>Si<sub>1</sub><sup>16</sup>O<sub>1</sub> [M+H]<sup>+</sup>: calculated: 202.1737, found: 202.1741.

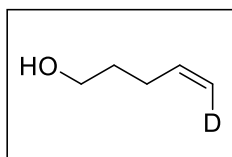

**(Z)-pent-4-en-5-d-1-ol (S25).** A 50 mL round bottom equipped with magnetic stir bar is charged with a solution of **S24** (1.36 g, 6.75 mmol, 1.0 equiv; mixed with PMHS, see above) in anhydrous THF (6.75 mL). The vessel and contents are then brought to 0°C, at which point TBAF solution in THF (16.8 mL, 1 M, 16.8 mmol, 2.5 equiv) is added dropwise (exothermic process). After addition, the mixture is allowed to stir at room temperature for 5h. The reaction mixture is then poured into a separatory funnel containing ca. 10 mL brine and the organics are extracted 3x with ca. 10 mL Et<sub>2</sub>O. Combined organics are then dried over Na<sub>2</sub>SO<sub>4</sub> and concentrated to yield crude oil. Oil is purified by SiO<sub>2</sub> chromatography (2.5% Et<sub>2</sub>O/Pentanes, gradient to 10% Et<sub>2</sub>O/Pentanes, visualized with KMnO<sub>4</sub> to yield clear, colorless oil (343.9 mg, 3.95 mmol, 55%

<sup>17</sup>Lalic, G.; Whittaker, A. M. *Org. Lett.*, **2013**, *15*, 1112

<sup>18</sup>For preparation see: Sadighi, J. P.; Mankad, N. P.; Laitar, D. S. *Organometallics*, **2004**, *23*, 3369

across 2 steps).  $^1\text{H NMR}$  (400 MHz,  $\text{CDCl}_3$ ):  $\delta$  5.87 – 5.79 (m, 1H), 4.97 (d,  $J = 10.2$  Hz, 1H), 3.67 (t,  $J = 6.5$  Hz, 2H), 2.15 (td,  $J = 7.6, 0.8$  Hz, 2H), 1.71 – 1.64 (m, 2H), 1.57 (br s, 1H);  $^{13}\text{C NMR}$  (150 MHz,  $\text{CDCl}_3$ ):  $\delta$  138.15 (s), 114.65 (t,  $J=23.5$  Hz), 62.50 (s), 31.80 (s), 30.04 (s);  $\text{IR}$  (neat): 2988.5 (w), 2869.8 (w), 1141.9 (m)  $\text{cm}^{-1}$ ;  $\text{HRMS}$ -(DART+) for  $^{12}\text{C}_5^1\text{H}_{10}^2\text{D}_1^{16}\text{O}_1$   $[\text{M}+\text{H}]^+$ : calculated: 88.0873, found: 88.0870.

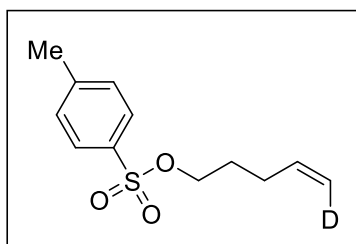

**(Z)-pent-4-en-1-yl-5-d 4-methylbenzenesulfonate (S26).**

A flame dried 20 mL vial equipped with magnetic stir bar is charged with TsCl (904 mg, 4.74 mmol, 1.10 equiv) followed by DMAP (105 mg, 0.86 mmol, 0.20 equiv). The vial is sealed and evacuated/refilled with  $\text{N}_2$  3x, then a solution of **S25** (375 mg, 4.31 mmol, 1.0 equiv) in anhydrous DCM (21.6 mL) is charged in. The mixture is brought to  $0^\circ\text{C}$  then reagent grade  $\text{NEt}_3$  (720  $\mu\text{L}$ , 5.17 mmol, 1.2 equiv) is added dropwise. The reaction is then allowed to stir at room temperature for 2h. At this point, the reaction mixture is treated with ca. 5 mL  $\text{H}_2\text{O}$  and the organics are extracted 3x with ca. 5 mL DCM. Combined organics are dried over  $\text{Na}_2\text{SO}_4$  then concentrated to yield crude oil. Crude material is purified by  $\text{SiO}_2$  chromatography (2.5%  $\text{Et}_2\text{O}$ /Pentanes, gradient to 10%  $\text{Et}_2\text{O}$ /Pentanes, visualized with CAM stain) to render clear, colorless oil (666 mg, 2.76 mmol, 64%).  $^1\text{H NMR}$  (500 MHz,  $\text{CDCl}_3$ ):  $\delta$  7.79 (d,  $J = 7.7$  Hz, 2H), 7.34 (d,  $J = 7.9$  Hz, 2H), 5.72 – 5.64 (m, 1H), 4.94 (d,  $J = 10.1$  Hz, 1H), 4.04 (t,  $J = 6.4$  Hz, 2H), 2.45 (s, 3H), 2.08 (q,  $J = 7.1$  Hz, 2H), 1.74 (p,  $J = 6.9$  Hz, 2H);  $^{13}\text{C NMR}$  (150 MHz,  $\text{CDCl}_3$ ):  $\delta$  144.66 (s), 136.51 (s), 133.19 (s), 129.80 (s), 127.89 (s), 115.56 (t,  $J=23.6$  Hz), 69.78 (s), 29.32 (s), 27.99 (s), 21.63 (s);  $\text{IR}$  (neat): 2957.1 (w), 1598.4 (w), 1359.0 (s), 1188.7 (s), 1097.8 (w), 928.0 (m), 810.6 (m), 664.2 (m), 554.6 (s)  $\text{cm}^{-1}$ ;  $\text{HRMS}$ -(DART+) for  $^{12}\text{C}_{12}^1\text{H}_{15}^2\text{D}_1^{32}\text{S}_1^{16}\text{O}_3^{23}\text{Na}_1$   $[\text{M}+\text{Na}]^+$ : calculated: 264.0781, found: 264.0780.

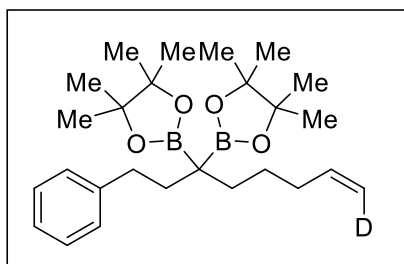

**(Z)-2,2'-(1-phenyloct-7-ene-3,3-diyl-8-d)bis(4,4,5,5-tetramethyl-1,3,2-dioxaborolane) (33).**

A flame dried 20 mL vial equipped with magnetic stir bar is charged with LTMP (405 mg, 2.75 mmol, 1.0 equiv) inside an argon-filled glovebox. The vial is sealed then moved to the hood where it is charged with anhydrous THF (9 mL). The orange solution is set to stir at  $0^\circ\text{C}$  then charged with a solution of **28** (1.02 g, 2.75 mmol, 1.0 equiv) in anhydrous THF (2 mL) where it is allowed to stir for 30 min. At this point, a solution of **S26** (663 mg, 2.75 mmol, 1.0 equiv) in anhydrous THF (2 mL) is added gradually. The mixture is brought to room temperature and allowed to stir overnight (23h). Upon return, the reaction mixture is diluted with  $\text{Et}_2\text{O}$  and passed through a pad of silica gel, rinsing with  $\text{Et}_2\text{O}$ . Filtrate is concentrated to render crude solid. Solid is purified by  $\text{SiO}_2$  chromatography (0%  $\text{EtOAc}$ /Hexanes, gradient to 3%  $\text{EtOAc}$ /Hexanes, visualized with CAM stain). Product isolated as a white solid (938 mg, 2.13 mmol, 77%).  $^1\text{H NMR}$  (500 MHz,  $\text{CDCl}_3$ ):  $\delta$  7.25 – 7.21 (m, 2H), 7.22 – 7.16 (m, 2H), 7.16 – 7.10 (m, 1H), 5.89 – 5.80 (m, 1H), 4.92 (d,  $J =$



10.3 Hz, 1H), 2.54 – 2.46 (m, 2H), 2.08 (q,  $J = 7.0$  Hz, 2H), 1.93 – 1.86 (m, 2H), 1.75 – 1.69 (m, 2H), 1.42 – 1.34 (m, 2H), 1.23 (s, 24H);  $^{13}\text{C}$  NMR (150 MHz,  $\text{CDCl}_3$ ):  $\delta$  143.93 (s), 139.40 (s), 128.63 (s), 128.24 (s), 125.50 (s), 113.85 (t,  $J=23.5$  Hz), 83.13 (s), 34.65 (s), 33.98 (s), 32.03 (s), 28.82 (s), 26.80 (s), 24.95 (s), 24.86 (s); IR (neat): 2978.5 (m), 2931.5 (w), 2858.9 (w), 1456.2 (w), 1378.6 (m), 1309.7 (s), 1255.2 (w), 1138.6 (s), 968.9 (w), 909.9 (m), 853.4 (m), 733.1 (s), 699.4 (w)  $\text{cm}^{-1}$ ; HRMS-(DART+) for  $^{12}\text{C}_{26}^{1}\text{H}_{42}^2\text{D}_1^{11}\text{B}_2^{16}\text{O}_4$   $[\text{M}+\text{H}]^+$ : calculated: 442.3410, found: 442.3422.

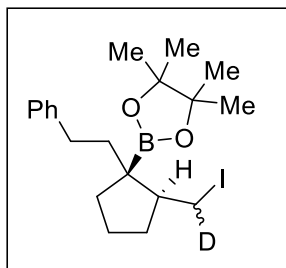

**2-((1R,2S)-2-(iodomethyl-*d*)-1-phenethylcyclopentyl)-4,4,5,5-tetramethyl-1,3,2-dioxaborolane (34).** The reaction was performed according to *Representative Procedure for Deborylative Cyclization* with **33** (88.2 mg, 0.2 mmol, 1.00 equiv),  $\text{KO}t\text{Bu}$  (44.9 mg, 0.4 mmol, 2.0 equiv) in THF (1 mL) for 1h 30min. Yellow reaction mixture was then quenched with an  $\text{I}_2$  solution in anhydrous THF (0.8 mL, 0.5 M, 0.4 mmol, 2.0 equiv), where the reaction turns white,

then purple. The crude reaction mixture was purified by  $\text{SiO}_2$  chromatography (0% EtOAc/Hexanes, gradient to 1% EtOAc/Hexanes, visualized with CAM stain) to afford a white solid (60.0 mg, 0.136 mmol, 68%; 1:1 mixture of epimers).  $^1\text{H}$  NMR (600 MHz,  $\text{CDCl}_3$ ):  $\delta$  7.29 – 7.25 (m, 2H), 7.20 – 7.15 (m, 3H), 3.52 (d,  $J = 3.1$  Hz, 0.5H), 3.13 (d,  $J = 12.1$  Hz, 0.5H), 2.60 – 2.51 (m, 2H), 2.20 – 2.11 (m, 2H), 2.03 – 1.94 (m, 2H), 1.79 – 1.70 (m, 1H), 1.68 – 1.59 (m, 1H), 1.47 – 1.40 (m, 2H), 1.40 – 1.33 (m, 1H), 1.26 (s, 12H).  $^{13}\text{C}$  NMR (150 MHz,  $\text{CDCl}_3$ ):  $\delta$  143.11 (s), 128.37 (s), 128.22 (s), 125.64 (s), 83.30 (s), 53.87 (s), 53.84 (s), 41.19 (s), 41.17 (s), 36.11 (s), 36.08 (s), 33.91 (s), 33.88 (s), 25.12 (s), 24.82 (s), 21.86 (s), 21.84 (s), 11.49 (t,  $J=22.9$  Hz), 11.47 (t,  $J=22.9$  Hz); IR (neat): 2976.1 (m), 2930.8 (m), 2867.2 (w), 1454.0 (w), 1380.7 (s), 1311.3 (s), 1199.0 (w), 1141.5 (s), 966.9 (w), 853.6 (w), 748.3 (w), 698.5 (m)  $\text{cm}^{-1}$ ; HRMS-(DART+) for  $^{12}\text{C}_{20}^1\text{H}_{29}^2\text{D}_1^{11}\text{B}_1^{16}\text{O}_2^{127}\text{I}_1^{23}\text{Na}_1$   $[\text{M}+\text{Na}]^+$ : calculated: 464.1344, found: 464.1339.

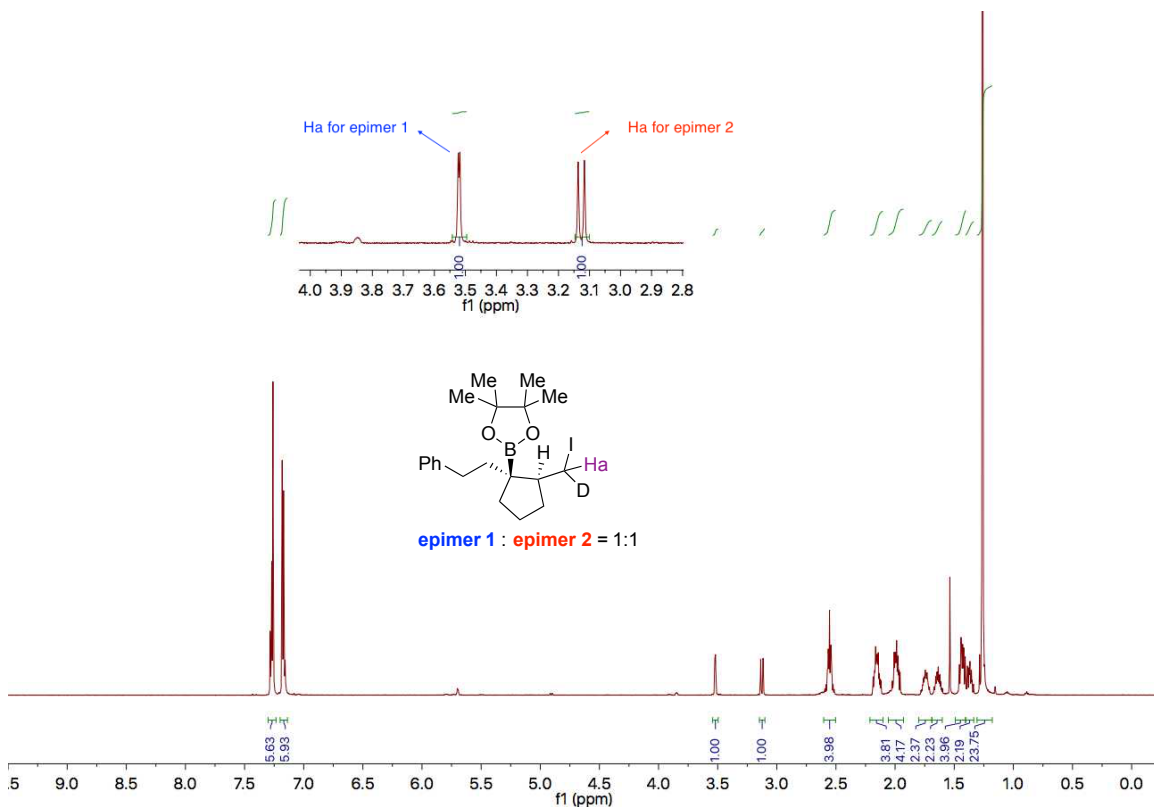

#### 4. Analysis of Reaction Intermediates by $^{13}\text{C}$ -Labeled Experiments I

##### a) Preparation of $^{13}\text{C}$ -Labeled geminal-Diboronate Ester:

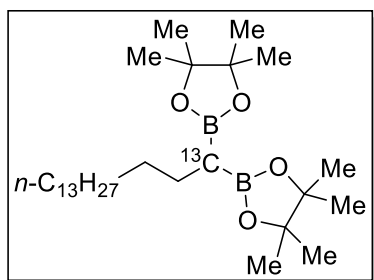

**2,2'-(hexadecane-1,1-diyl-1- $^{13}\text{C}$ )bis(4,4,5,5-tetramethyl-1,3,2-dioxaborolane) (S27).** Prepared from palmitic acid- $^{13}\text{C}$  according to the literature procedure. The  $^1\text{H}$  and  $^{13}\text{C}$  NMR spectra were in accord with previously reported data.<sup>19</sup>  $^1\text{H}$  NMR (500 MHz,  $\text{CDCl}_3$ ):  $\delta$  1.55-1.53 (m, 2H), 1.31-1.22 (m, 50H), 0.88 (t,  $J = 6.9$  Hz, 3H), 0.71 (2dt,  $J = 111.5, 7.8$  Hz, 1H).

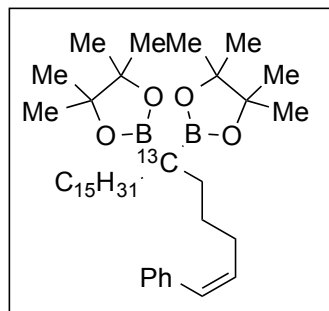

**(Z)-2,2'-(1-phenylhenicos-1-ene-6,6-diyl-6- $^{13}\text{C}$ )bis(4,4,5,5-tetramethyl-1,3,2-dioxaborolane) (24).** Prepared according to Representative Procedure for Preparation of geminal-Diboronate Esters (Method D) with S27 (250 mg, 0.52 mmol), LTMP (92 mg, 0.624 mmol), (Z)-(5-bromopent-1-en-1-yl)benzene (141 mg, 0.624 mmol) and THF (2.5 mL). The crude reaction mixture was purified by column chromatography on silica gel (100:1

<sup>19</sup> K. Hong, X. Liu, and J. P. Morken *J. Am. Chem. Soc.* **2014**, *136*, 10581.

hexanes/ethyl acetate, stain in CAM) to afford a colorless oil (191 mg, 59%).  $^1\text{H NMR}$  (500 MHz,  $\text{CDCl}_3$ ):  $\delta$  7.40 – 7.24 (m, 4H), 7.19 (t,  $J = 7.0$  Hz, 1H), 6.36 (d,  $J = 11.7$  Hz, 1H), 5.70 (dt,  $J = 11.8, 7.2$  Hz, 1H), 2.60 – 2.22 (m, 2H), 1.71 – 1.63 (m, 2H), 1.59 (dt,  $J = 7.8, 4.1$  Hz, 2H), 1.37 (t,  $J = 7.9$  Hz, 2H), 1.31 – 1.22 (m, 26H), 1.21 (s, 24H), 0.88 (t,  $J = 7.0$  Hz, 3H);  $^1\text{H NMR}$  (500 MHz,  $\text{THF-}d_8$ ):  $\delta$  7.38 – 7.20 (m, 4H), 7.20 – 7.11 (m, 1H), 6.48 – 6.25 (d,  $J = 11.8$  Hz, 1H), 5.71 – 5.58 (m, 1H), 2.36 – 2.22 (m, 2H), 1.67 – 1.52 (m, 4H), 1.48 – 1.37 (m, 2H), 1.29 (d,  $J = 2.6$  Hz, 26H), 1.22 – 1.11 (m, 24H), 0.93 – 0.84 (m, 3H);  $^{13}\text{C NMR}$  (125 MHz,  $\text{CDCl}_3$ ):  $\delta$  137.87, 133.55, 128.72, 128.34, 128.01, 126.26, 82.84, 31.91, 30.40, 30.36, 29.71, 29.69, 29.66, 29.65, 29.60, 29.34, 29.01, 28.94, 28.78, 28.70, 27.67, 27.12, 24.72, 22.67, 19.29, 14.09;  $^{13}\text{C NMR}$  (125 MHz,  $\text{THF-}d_8$ ):  $\delta$  139.00, 134.07, 129.71, 129.61, 128.94, 127.25, 83.55, 33.05, 31.73, 30.84, 30.78, 30.76, 30.48, 30.36, 28.81, 28.16, 23.73, 20.13(br, C-B), 14.60;  $\text{IR}$  (neat): 2958.2 (m), 2924.6 (s), 2854.5 (m), 1729.3 (m), 1463.0 (w), 1377.4 (w), 1344.6 (w), 1288.6 (s), 1269.5 (s), 1138.7 (s), 1072.3 (w), 854.8 (w), 700.0 (w)  $\text{cm}^{-1}$ ;  $\text{HRMS}$ -(DART+) for  $^{12}\text{C}_{38}^{13}\text{C}_1\text{H}_{68}^{11}\text{B}_2^{16}\text{O}_4$   $[\text{M}+\text{H}]^+$ : 624.5416, found: 624.5418.

## b) $^{13}\text{C NMR}$ Experiments

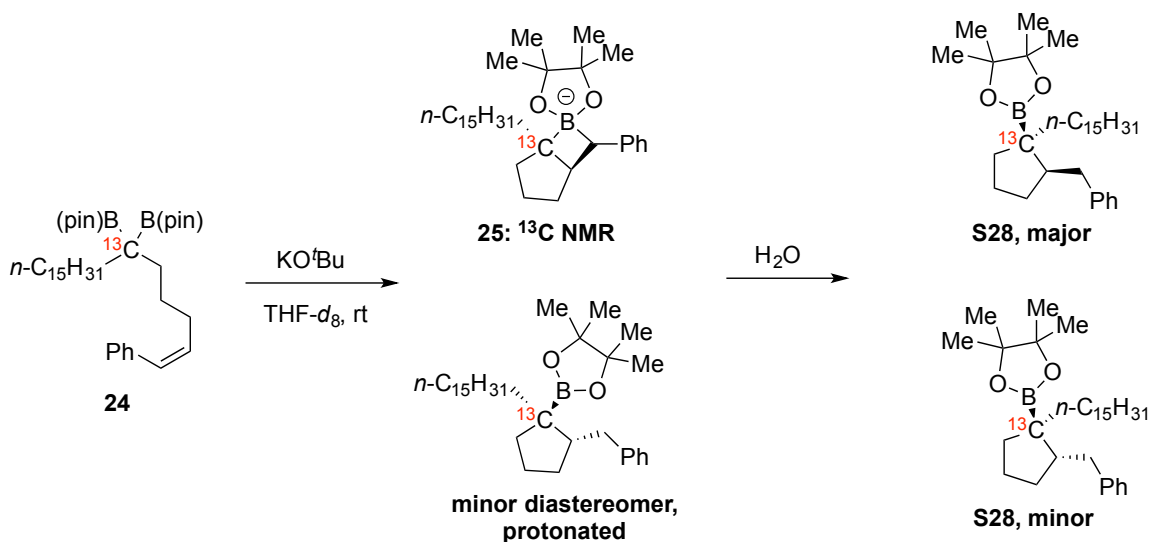

In the glove box, an oven-dried NMR tube is charged with diboronate ester **24** (31.2 mg, 0.05 mmol),  $\text{KO}^t\text{-Bu}$  (11.2 mg, 0.1 mmol) and  $\text{THF-}d_8$  (0.60 mL). The NMR tube is then sealed with a rubber septum, removed from the glove box, and monitored by  $^{13}\text{C NMR}$  at 25 °C. After 7 hours, water (2.7  $\mu\text{L}$ , 0.15 mmol) is added via syringe, and the mixture again observed by  $^{13}\text{C NMR}$ . At this point, the reaction mixture is diluted with diethyl ether, filtered through a silica gel plug, rinsed with diethyl ether, and concentrated *in vacuo*. The crude reaction mixture is purified on silica gel (hexanes: ethyl acetate = 100:0.6) to afford the desired product **S28** (19.6 mg, 79% yield, d.r. > 10:1) together with protodeborylation byproduct (2.1 mg).

**$^{13}\text{C}$  NMR Spectra of the Reaction Mixture (125 MHz, THF- $d_8$ ,  $\delta$  10–60 ppm):**

i. Diboronate ester **24**

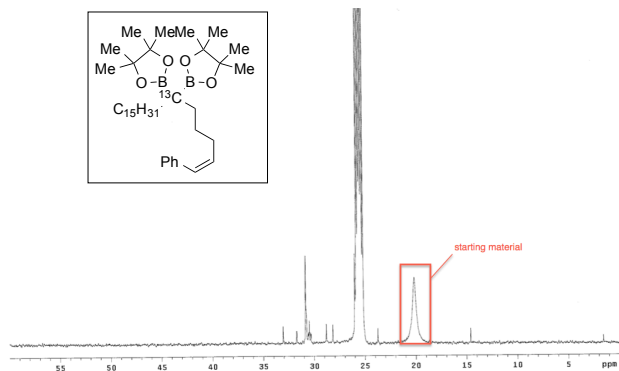

ii. **24** and KO $t$ -Bu for 30 minutes

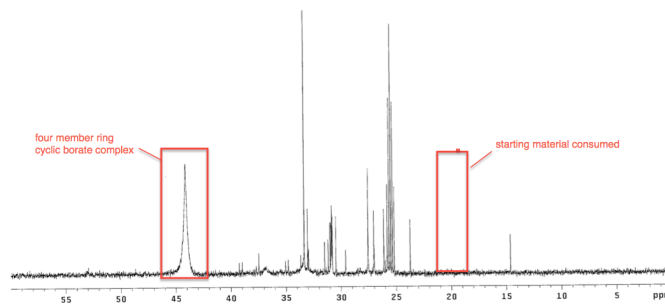

iii. **24** and KO $t$ -Bu for 180 minutes

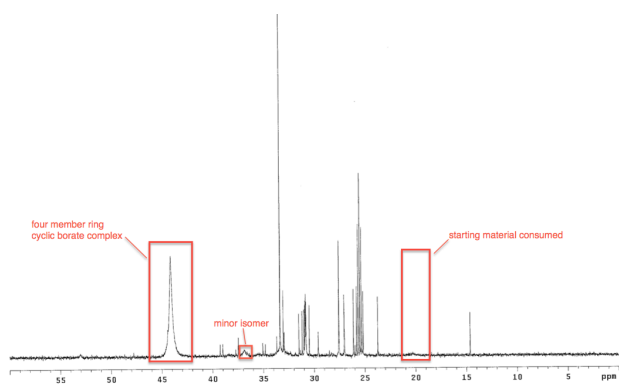

iv. **24** and KO $t$ -Bu for 7 hours

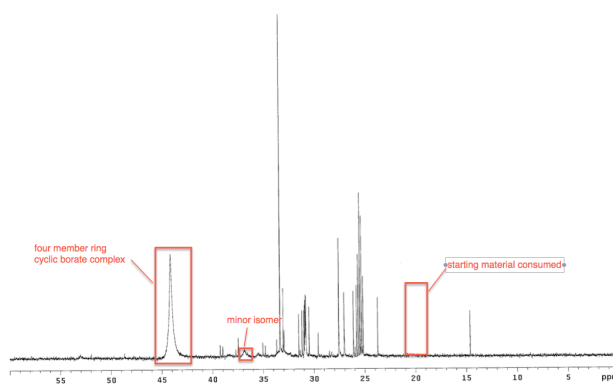

v. 1 minute after H $_2$ O was added

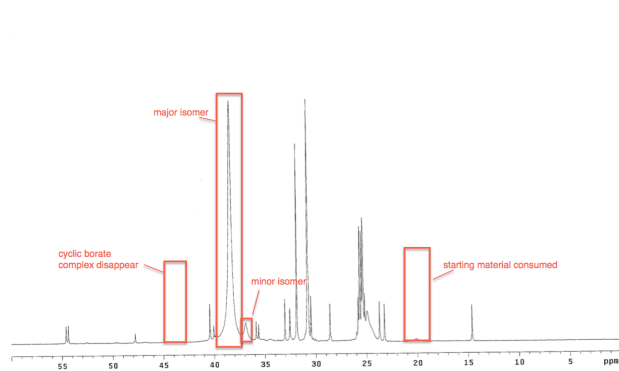

vi. Isolated product, **S28**

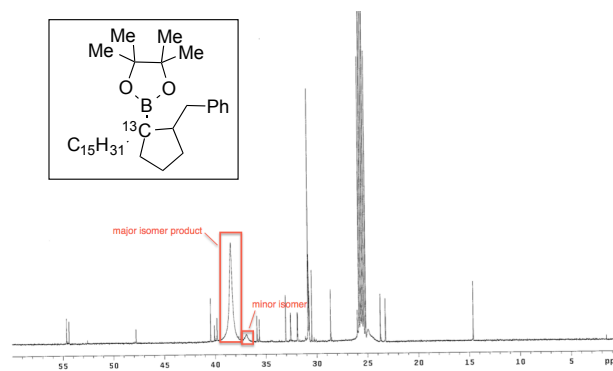

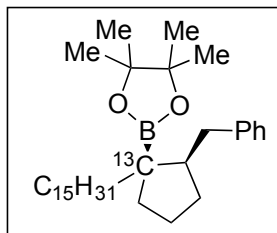

**2-(2-benzyl-1-pentadecylcyclopentyl-1-<sup>13</sup>C)-4,4,5,5-tetramethyl-1,3,2-dioxaborolane. (S28, major diastereomer)** <sup>1</sup>H NMR (500 MHz, CDCl<sub>3</sub>): δ 7.27 – 7.22 (m, 2H), 7.17 – 7.13 (m, 3H), 2.99 (dt, *J* = 13.4, 2.4 Hz, 1H), 2.32 (ddd, *J* = 13.1, 11.5, 1.4 Hz, 1H), 1.97 (dddd, *J* = 12.5, 8.7, 4.7, 1.5 Hz, 1H), 1.82 – 1.74 (m, 1H), 1.73 – 1.56 (m, 3H), 1.52 – 1.41 (m, 1H), 1.35 – 1.18 (m, 40H), 1.12 – 1.03 (m, 1H), 0.88 (t, *J* = 6.9 Hz, 3H); <sup>1</sup>H NMR (500 MHz, THF-*d*<sub>8</sub>): δ 7.21 – 7.16 (m, 2H), 7.13 – 7.06 (m, 3H), 2.98 (dt, *J* = 13.5, 2.6 Hz, 1H), 2.41 – 2.28 (m, 1H), 2.08 – 1.96 (m, 1H), 1.90 – 1.78 (m, 1H), 1.67 – 1.52 (m, 2H), 1.51 – 1.41 (m, 2H), 1.37 – 1.23 (m, 38H), 1.22 – 1.14 (m, 2H), 1.11 – 1.02 (m, 1H), 0.89 (td, *J* = 6.9, 2.4 Hz, 3H); <sup>13</sup>C NMR (125 MHz, CDCl<sub>3</sub>): δ 143.10, 128.82, 128.04, 125.36, 82.88, 53.07, 52.83, 46.76, 39.39, 38.80, 38.54, 37.36, 34.42, 34.17, 31.92, 31.33, 31.31, 30.72, 30.68, 29.72, 29.70, 29.65, 29.64, 29.36, 27.47, 25.16, 24.85, 24.81, 22.68, 22.40, 14.12; <sup>13</sup>C NMR (125 MHz, THF-*d*<sub>8</sub>): δ 144.03, 144.00, 129.70, 129.64, 128.98, 128.95, 126.32, 83.89, 54.63, 54.40, 47.80, 40.44, 40.08, 39.81, 38.41, 35.89, 35.64, 33.06, 32.58, 32.55, 31.92, 31.88, 30.84, 30.80, 30.76, 30.74, 30.49, 28.63, 23.74, 23.25, 14.61; IR (neat): 2956.4 (m), 2923.6 (s), 2853.7 (m), 1728.8 (m), 1462.6 (w), 1378.0 (w), 1287.5 (m), 1141.5 (m), 1072.2 (w), 743.0 (w), 699.7 (w) cm<sup>-1</sup>; HRMS-(DART+) for <sup>12</sup>C<sub>32</sub><sup>13</sup>C<sub>1</sub>H<sub>58</sub><sup>11</sup>B<sub>1</sub><sup>16</sup>O<sub>2</sub> [M+H]<sup>+</sup>: calculated: 498.4563, found: 498.4574.

## 5. Analysis of Reaction Intermediates by <sup>13</sup>C-Labeled Experiments II

### a) Preparation of <sup>13</sup>C-Labeled Alkene of geminal-Diboronate Ester

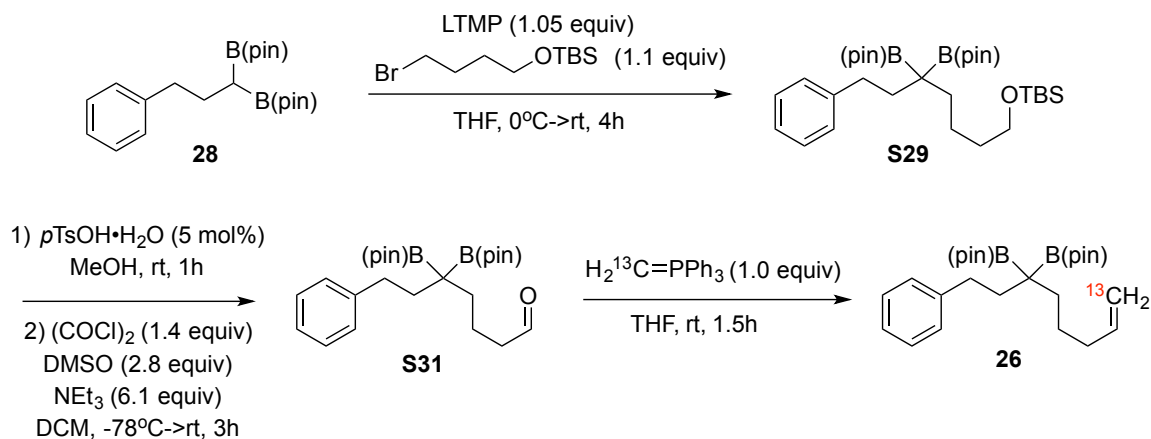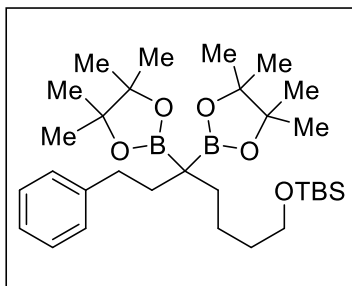

**tert-butyl dimethyl((7-phenyl-5,5-bis(4,4,5,5-tetramethyl-1,3,2-dioxaborolan-2-yl)heptyl)oxy)silane (S29).** The reaction was performed according to *Representative Procedure (Method D)* with diboronate ester **28** (372.3 mg, 1.0 mmol), LTMP (155 mg, 1.05 mmol), (4-bromobutoxy)(*tert*-butyl)dimethylsilane

(294.0 mg, 1.10 mmol) and THF (4 mL). The crude reaction mixture was purified by column chromatography on silica gel (1% EtOAc/Hexanes, gradient to 3% EtOAc/Hexanes, visualized with CAM stain) to afford a clear, colorless oil (522.9 mg, 94%).  $^1\text{H NMR}$  (500 MHz,  $\text{CDCl}_3$ ):  $\delta$  7.27 – 7.21 (m, 2H), 7.21 – 7.17 (m, 2H), 7.16 – 7.10 (m, 1H), 3.62 (t,  $J = 6.5$  Hz, 2H), 2.55 – 2.45 (m, 2H), 1.94 – 1.84 (m, 2H), 1.76 – 1.66 (m, 2H), 1.58 – 1.49 (m, 2H), 1.38 – 1.27 (m, 2H), 1.23 (s, 24H), 0.89 (s, 9H), 0.04 (s, 6H);  $^{13}\text{C NMR}$  (125 MHz,  $\text{CDCl}_3$ ):  $\delta$  143.83 (s), 128.50 (s), 128.07 (s), 125.32 (s), 82.95 (s), 63.52 (s), 33.88 (s), 33.84 (s), 31.91 (s), 29.01 (s), 26.00 (s), 24.81 (s), 24.70 (s), 23.63 (s), 18.34 (s), -5.22 (s);  $\text{IR}$  (neat): 2977.0 (w), 2928.8 (m), 2857.4 (w), 1349.2 (m), 1306.0 (m), 1253.9 (m), 1138.3 (s), 1101.4 (m), 850.4 (m), 835.8 (m), 775.0 (m), 699.0 (m)  $\text{cm}^{-1}$ .  $\text{HRMS}$ -(DART+) for  $^{12}\text{C}_{31}\text{H}_{57}^{11}\text{B}_2^{16}\text{O}_5^{28}\text{Si}_1$  [M+H]: calculated: 559.4161, found: 559.4183.

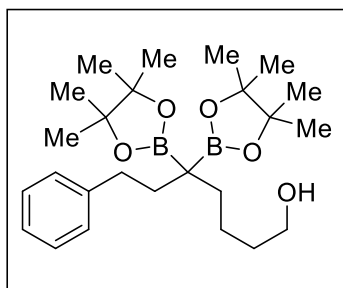

**7-phenyl-5,5-bis(4,4,5,5-tetramethyl-1,3,2-dioxaborolan-2-yl)heptan-1-ol (S30).** A 20 mL vial containing **S29** (482 mg, 0.86 mmol, 1.0 equiv) and magnetic stirbar is loaded with reagent grade MeOH (6.9 mL, 0.125 M). The heterogeneous mixture is set to stir at room temperature, then *p*-TsOH monohydrate added (8.2 mg, 0.04 mmol, 0.05 equiv). The mixture almost immediately becomes homogeneous. Allowed to stir 1h at rt then volatile components removed *in vacuo*. Resulting crude oil

is then purified by  $\text{SiO}_2$  chromatography (5% EtOAc/Hexanes, gradient to 25% EtOAc/Hexanes, visualized with  $\text{KMnO}_4$  stain). Product isolated as white solid (356.3 mg, 93%).  $^1\text{H NMR}$  (500 MHz,  $\text{CDCl}_3$ ):  $\delta$  7.27 – 7.22 (m, 2H), 7.22 – 7.17 (m, 2H), 7.16 – 7.11 (m, 1H), 3.73 – 3.65 (m, 2H), 2.56 – 2.48 (m, 2H), 1.93 – 1.85 (m, 2H), 1.75 – 1.64 (m, 3H), 1.64 – 1.56 (m, 2H), 1.44 – 1.31 (m, 2H), 1.23 (s, 24H);  $^{13}\text{C NMR}$  (125 MHz,  $\text{CDCl}_3$ ):  $\delta$  143.67 (s), 128.45 (s), 128.11 (s), 125.40 (s), 83.07 (s), 62.33 (s), 33.84 (s), 32.72 (s), 32.13 (s), 27.98 (s), 24.79 (s), 24.66 (s), 23.03 (s);  $\text{IR}$  (neat): 3457.7 (w, br), 2977.0 (w), 2929.0 (w), 2861.0 (w), 1348.8 (m), 1307.5 (s), 1250.7 (m), 1137.6 (s), 853.2 (m), 699.8 (w)  $\text{cm}^{-1}$ .  $\text{HRMS}$ -(DART+) for  $^{12}\text{C}_{25}\text{H}_{43}^{11}\text{B}_2^{16}\text{O}_5$  [M+H]: calculated: 445.3297, found: 445.3286.

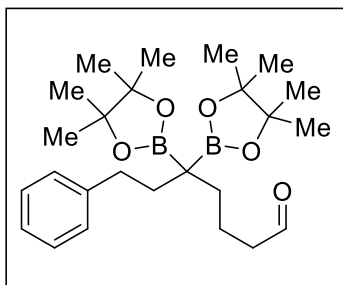

**7-phenyl-5,5-bis(4,4,5,5-tetramethyl-1,3,2-dioxaborolan-2-yl)heptanal (S31).** A flame dried 20 mL vial equipped with magnetic stirbar is sealed with rubber septum then evacuated/backfilled with  $\text{N}_2$  3x. The vial is then charged with  $(\text{COCl})_2$  (71.1  $\mu\text{L}$ , 0.84 mmol, 1.4 equiv) followed by anhydrous DCM (0.3 mL). The solution is then set to stir at  $-78^\circ\text{C}$  and anhydrous DMSO (119  $\mu\text{L}$ , 1.67 mmol, 2.8 equiv) was added dropwise, significant gas evolution noted. The

mixture was allowed to stir at  $-78^\circ\text{C}$  for ca. 10min. A solution of **S30** in anhydrous DCM (0.3 mL) is then added dropwise, followed immediately by the slow addition of freshly distilled  $\text{NEt}_3$  (507  $\mu\text{L}$ , 3.64 mmol, 6.1 equiv; salt formation observed). The vessel and contents were then

allowed to warm to room temperature and stir an additional 3h. Volatiles were then removed by high vacuum and the organics redissolved in EtOAc. Organics were washed with a saturated, aqueous  $\text{Na}_2\text{CO}_3$  solution then concentrated to yield crude oil. Oil purified by  $\text{SiO}_2$  chromatography (5% EtOAc/Hexanes, gradient to 10% EtOAc/Hexanes, visualized with CAM stain). Product isolated as white solid (232 mg, 0.52 mmol, 88%).  $^1\text{H NMR}$  (600 MHz,  $\text{CDCl}_3$ ):  $\delta$  9.77 (s, 1H), 7.27 – 7.22 (m, 2H), 7.22 – 7.18 (m, 2H), 7.18 – 7.11 (m, 1H), 2.55 – 2.49 (m, 2H), 2.46 – 2.40 (m, 2H), 1.95 – 1.89 (m, 2H), 1.75 – 1.69 (m, 2H), 1.66 – 1.59 (m, 2H), 1.23 (s, 24H);  $^{13}\text{C NMR}$  (150 MHz,  $\text{CDCl}_3$ ):  $\delta$  203.07 (s), 143.53 (s), 128.48 (s), 128.14 (s), 125.45 (s), 83.12 (s), 44.61 (s), 33.83 (s), 31.89 (s), 28.98 (s), 24.81 (s), 24.72 (s), 19.86 (s);  $\text{IR}$  (neat): 2977.3 (w), 2931.7 (w), 1708.3 (m), 1454.9 (w), 1310.4 (m), 1252.4 (m), 1137.5 (s), 853.9 (w)  $\text{cm}^{-1}$ .  $\text{HRMS}$ -(DART+) for  $^{12}\text{C}_{25}^{1}\text{H}_{41}^{11}\text{B}_2^{16}\text{O}_5$  [M+H]: calculated: 443.3140, found: 443.3138.

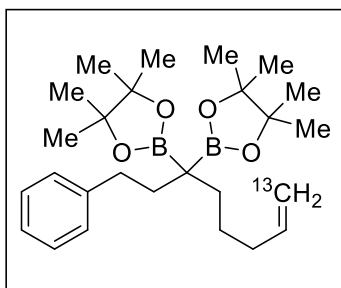

**2,2'-(1-phenyloct-7-ene-3,3-diyl-8- $^{13}\text{C}$ )bis(4,4,5,5-tetramethyl-1,3,2-dioxaborolane) (26).** A flame dried, 20 mL vial equipped with magnetic stirbar is charged with Methyl- $^{13}\text{C}$ -triphenylphosphonium iodide (212 mg, 0.52 mmol, 1 equiv) and  $\text{KO}t\text{-Bu}$  (59 mg, 0.52 mmol, 1 equiv) inside an argon-filled glovebox. Anhydrous THF is then charged into the vessel (1.5 mL) to give a vivid yellow solution. Vessel is sealed with a rubber septum and moved to the fume hood where it is

allowed to stir for 1h at room temperature. A solution of **S31** (231 mg, 0.52 mmol, 1 equiv) in anhydrous THF (1.5 mL) is then added to the reaction vessel. The yellow color fades and a white suspension remains. The suspension is allowed to stir for 1.5h at room temperature at which point it is passed through a pad of  $\text{SiO}_2$ , rinsing with  $\text{Et}_2\text{O}$ . The resulting clear, colorless solution is concentrated to give a white solid. Product is isolated by  $\text{SiO}_2$  chromatography (1% EtOAc/Hexanes, gradient to 5% EtOAc/Hexanes, visualized by CAM stain) to give white solid (208 mg, 0.47 mmol, 91%).  $^1\text{H NMR}$  (600 MHz,  $\text{CDCl}_3$ ):  $\delta$  7.26 – 7.22 (m, 2H), 7.22 – 7.18 (m, 2H), 7.16 – 7.09 (m, 1H), 5.86 (ddt,  $J = 16.8, 10.2, 6.6$  Hz, 1H), 5.01 (ddd,  $J = 153.4, 17.2, 1.8$  Hz, 1H), 4.93 (ddd,  $J = 156.8, 10.2, 2.0$  Hz, 1H), 2.54 – 2.47 (m, 2H), 2.11 – 2.04 (m, 2H), 1.93 – 1.85 (m, 2H), 1.75 – 1.69 (m, 2H), 1.43 – 1.34 (m, 2H), 1.23 (s, 24H);  $^{13}\text{C NMR}$   $\delta$  143.78 (s), 139.33 (d,  $J = 69.2$  Hz), 128.49 (s), 128.09 (s), 125.35 (s), 113.98 (s,  $^{13}\text{C}$ ), 82.98 (s), 34.55 (s), 33.83 (s), 31.88 (s), 28.66 (s), 26.65 (d,  $J = 3.6$  Hz), 24.80 (s), 24.71 (s);  $\text{IR}$  (neat): 2977.9 (w), 2927.4 (w), 2858.9 (w), 1352.9 (w), 1307.7 (2), 1255.5 (w), 1139.2 (m), 855.6 (w)  $\text{cm}^{-1}$ .  $\text{HRMS}$ -(DART+) for  $^{12}\text{C}_{25}^{13}\text{C}_1^1\text{H}_{43}^{11}\text{B}_2^{16}\text{O}_4$  [M+H]: calculated: 442.3381, found: 442.3388.

b)  $^{13}\text{C}$  NMR Experiments of  $^{13}\text{C}$ -Labeled *geminal*-Diboronate Ester

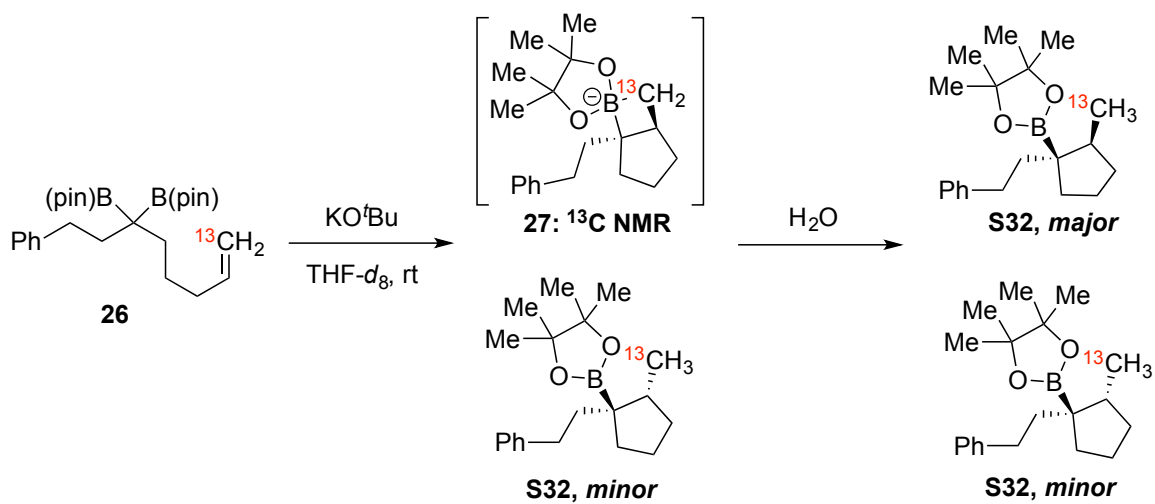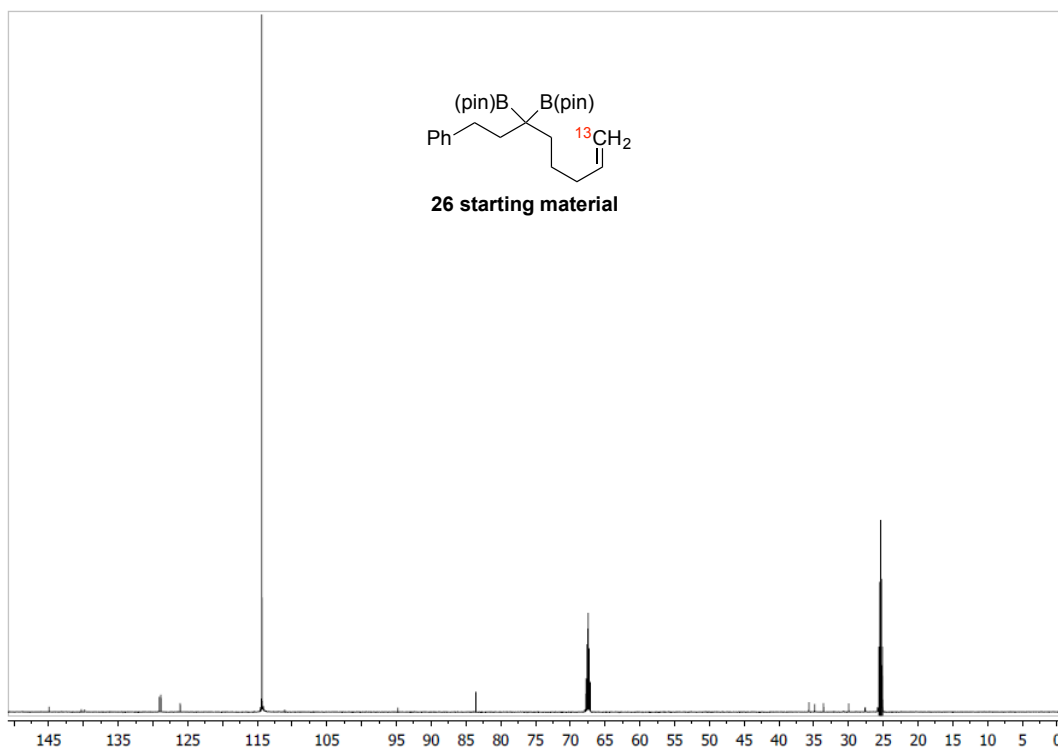

Figure 1 -  $^{13}\text{C}$  labeled starting material (**26**) in  $d_8$ -THF



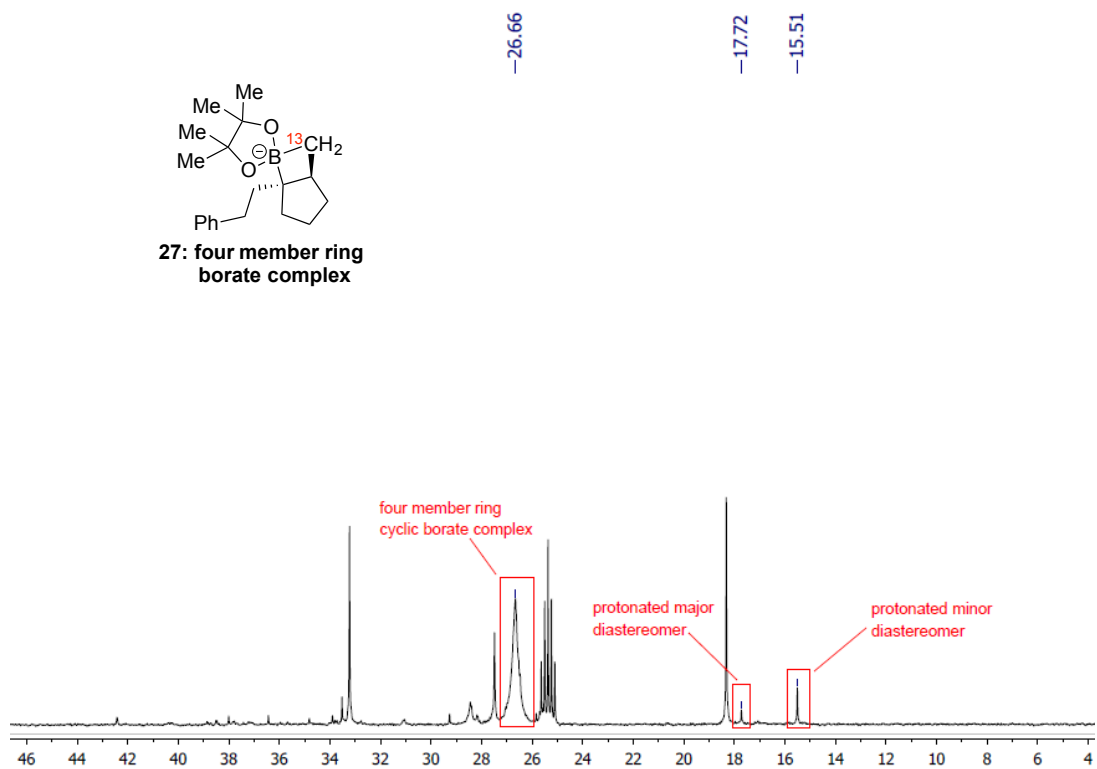

Figure 2 - **26** with  $\text{KOt-Bu}$  for 20 minutes in  $d_8$ -THF (zoomed in on significant region for clarity)

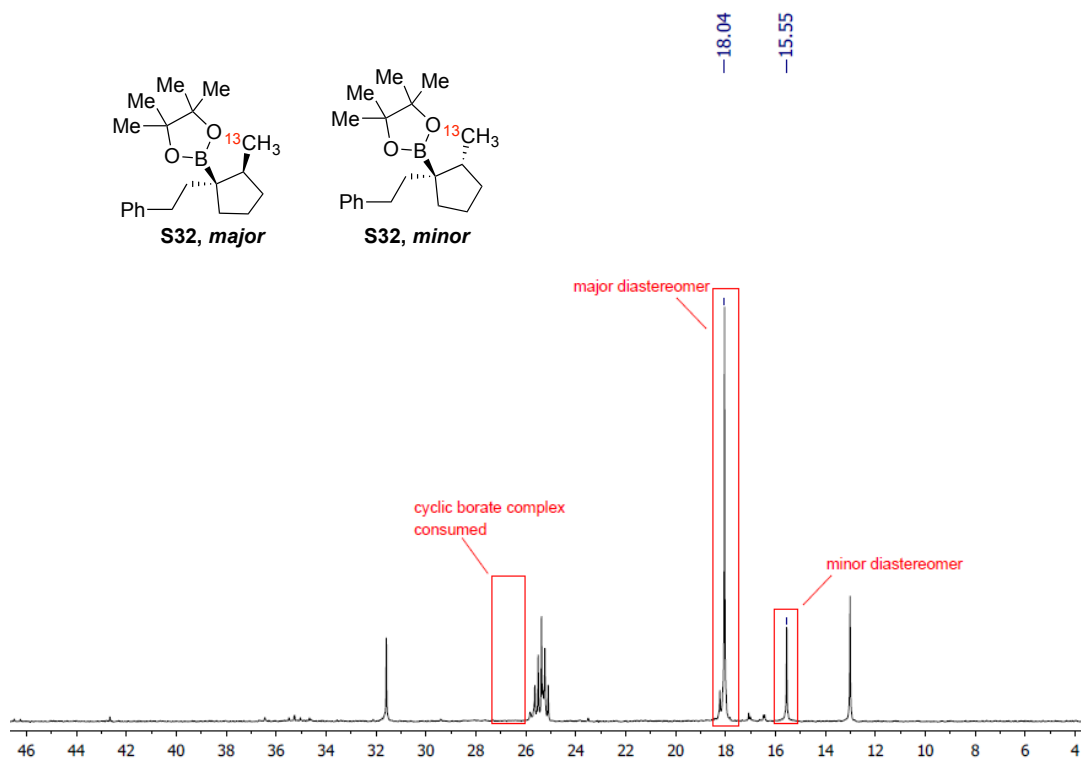

Figure 3 - 1 minute after addition of  $\text{H}_2\text{O}$

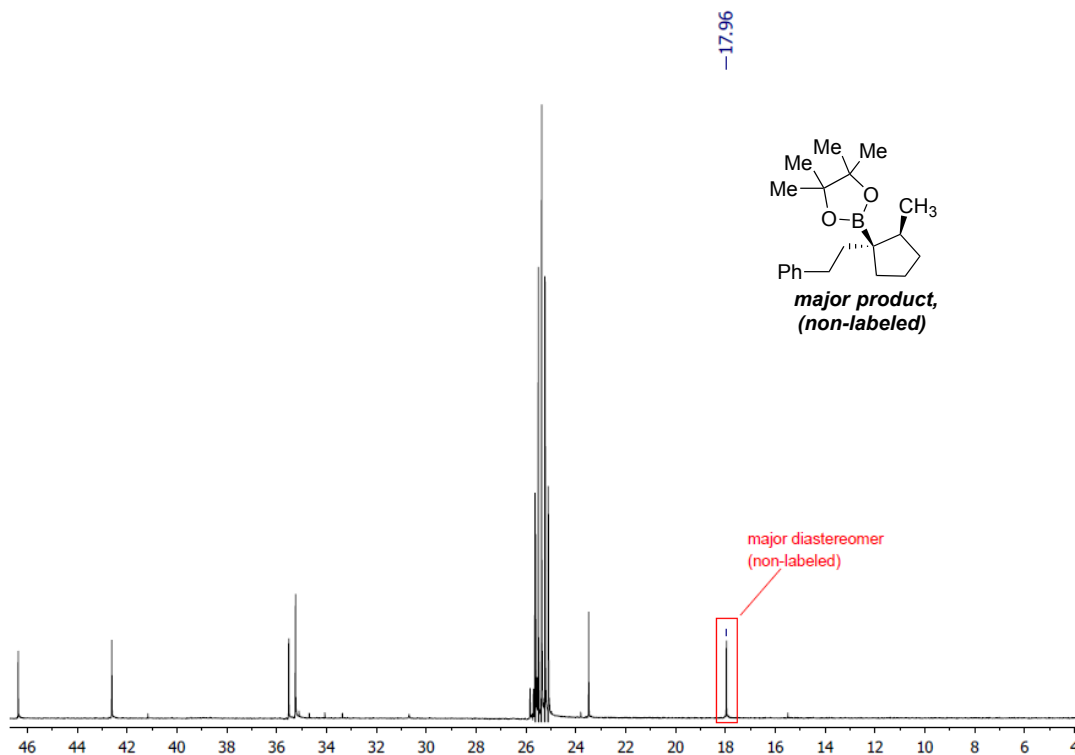

Figure 4 - Isolated major product (non-<sup>13</sup>C labeled) in *d*<sub>8</sub>-THF

### *X-ray crystallographic data*

X-ray crystallographic data for  
2-((1*R*,2*S*)-2-(iodomethyl)-1-phenethylcyclopentyl)-4,4,5,5-tetramethyl-1,3,2-dioxaborolane  
(Compound 9).

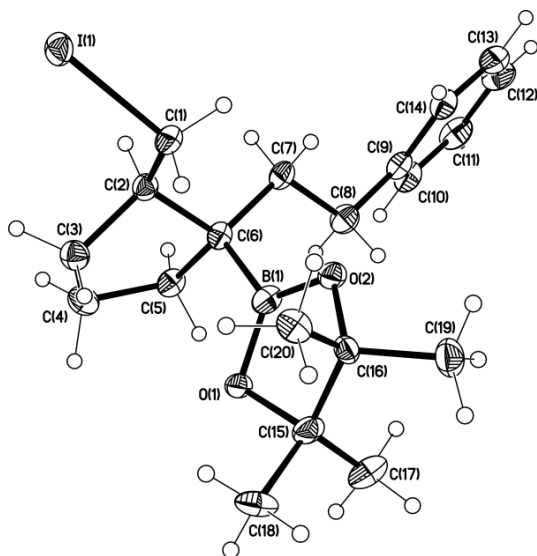

**Table S2.**

Crystal data and structure refinement for **2-((1*R*,2*S*)-2-(iodomethyl)-1-phenethylcyclopentyl)-4,4,5,5-tetramethyl-1,3,2-dioxaborolane. (Compound 12).**

|                                           |                                                                      |                              |
|-------------------------------------------|----------------------------------------------------------------------|------------------------------|
| Identification code                       | C20H30BIO2                                                           |                              |
| Empirical formula                         | C20 H30 B I O2                                                       |                              |
| Formula weight                            | 440.15                                                               |                              |
| Temperature                               | 100(2) K                                                             |                              |
| Wavelength                                | 0.71073 $\approx$                                                    |                              |
| Crystal system                            | Triclinic                                                            |                              |
| Space group                               | P-1                                                                  |                              |
| Unit cell dimensions                      | a = 6.5129(8) $\approx$                                              | $\alpha = 99.987(2)^\circ$ . |
|                                           | b = 13.4237(16) $\approx$                                            | $\beta = 95.992(2)^\circ$ .  |
|                                           | c = 23.452(3) $\approx$                                              | $\gamma = 96.163(2)^\circ$ . |
| Volume                                    | 1991.7(4) $\approx^3$                                                |                              |
| Z                                         | 4                                                                    |                              |
| Density (calculated)                      | 1.468 Mg/m <sup>3</sup>                                              |                              |
| Absorption coefficient                    | 1.617 mm <sup>-1</sup>                                               |                              |
| F(000)                                    | 896                                                                  |                              |
| Crystal size                              | 0.400 x 0.210 x 0.150 mm <sup>3</sup>                                |                              |
| Theta range for data collection           | 1.639 to 28.450 $^\circ$ .                                           |                              |
| Index ranges                              | -8 $\leq$ h $\leq$ 8, -17 $\leq$ k $\leq$ 17, -31 $\leq$ l $\leq$ 31 |                              |
| Reflections collected                     | 38081                                                                |                              |
| Independent reflections                   | 10019 [R(int) = 0.0443]                                              |                              |
| Completeness to theta = 25.242 $^\circ$   | 100.0 %                                                              |                              |
| Absorption correction                     | Semi-empirical from equivalents                                      |                              |
| Max. and min. transmission                | 0.7457 and 0.6368                                                    |                              |
| Refinement method                         | Full-matrix least-squares on F <sup>2</sup>                          |                              |
| Data / restraints / parameters            | 10019 / 1 / 500                                                      |                              |
| Goodness-of-fit on F <sup>2</sup>         | 1.014                                                                |                              |
| Final R indices [I $\geq$ 2 $\sigma$ (I)] | R1 = 0.0315, wR2 = 0.0648                                            |                              |
| R indices (all data)                      | R1 = 0.0501, wR2 = 0.0718                                            |                              |
| Extinction coefficient                    | na                                                                   |                              |
| Largest diff. peak and hole               | 1.372 and -0.705 e. $\approx^3$                                      |                              |

**Table S3.**

Atomic coordinates ( $\times 10^4$ ) and equivalent isotropic displacement parameters ( $\approx^2 \times 10^3$ ) for C<sub>20</sub>H<sub>30</sub>BiO<sub>2</sub>.  $U(\text{eq})$  is defined as one third of the trace of the orthogonalized  $U^{ij}$  tensor.

|        | x        | y       | z       | U(eq) |
|--------|----------|---------|---------|-------|
| I(1)   | -2688(1) | 8964(1) | 2686(1) | 22(1) |
| O(2)   | 53(3)    | 6298(1) | 3911(1) | 20(1) |
| B(1)   | 1532(5)  | 7128(2) | 4056(1) | 21(1) |
| C(1)   | -1455(4) | 8104(2) | 3314(1) | 20(1) |
| C(2)   | 292(4)   | 8747(2) | 3743(1) | 18(1) |
| C(3)   | 2305(4)  | 8995(2) | 3486(1) | 22(1) |
| C(4)   | 3922(4)  | 9401(2) | 4024(1) | 24(1) |
| C(5)   | 3035(4)  | 8990(2) | 4538(1) | 20(1) |
| C(6)   | 1022(4)  | 8255(2) | 4272(1) | 17(1) |
| C(7)   | -613(4)  | 8255(2) | 4702(1) | 20(1) |
| C(8)   | 141(4)   | 7877(2) | 5255(1) | 24(1) |
| C(9)   | -1343(4) | 7918(2) | 5712(1) | 20(1) |
| C(10)  | -665(4)  | 8360(2) | 6286(1) | 26(1) |
| C(11)  | -1990(5) | 8377(2) | 6714(1) | 30(1) |
| C(12)  | -4042(5) | 7939(2) | 6566(1) | 31(1) |
| C(13)  | -4752(4) | 7494(2) | 5993(1) | 28(1) |
| C(14)  | -3424(4) | 7487(2) | 5567(1) | 22(1) |
| O(1)   | 3490(10) | 6911(6) | 3899(3) | 18(1) |
| C(15)  | 3369(4)  | 5794(2) | 3800(1) | 24(1) |
| C(16)  | 971(8)   | 5454(4) | 3569(3) | 17(1) |
| C(17)  | 4185(11) | 5443(5) | 4300(3) | 28(2) |
| C(18)  | 4715(9)  | 5507(5) | 3275(3) | 26(1) |
| C(19)  | 138(11)  | 4472(5) | 3748(3) | 29(2) |
| C(20)  | 314(7)   | 5426(4) | 2926(2) | 22(1) |
| O(1X)  | 3508(11) | 6877(7) | 4129(3) | 18(1) |
| C(15X) | 3369(4)  | 5794(2) | 3800(1) | 24(1) |
| C(16X) | 1111(8)  | 5382(4) | 3915(3) | 21(1) |
| C(17X) | 5083(10) | 5330(6) | 4167(4) | 27(2) |
| C(18X) | 3761(13) | 5791(6) | 3223(3) | 33(2) |

|        |         |         |         |       |
|--------|---------|---------|---------|-------|
| C(19X) | 925(10) | 5039(5) | 4499(3) | 31(2) |
| C(20X) | 69(12)  | 4557(6) | 3430(4) | 37(2) |
| I(2)   | 1188(1) | -112(1) | 1601(1) | 24(1) |
| O(3)   | 7717(3) | 2663(1) | 800(1)  | 22(1) |
| O(4)   | 4297(3) | 2481(1) | 432(1)  | 21(1) |
| B(2)   | 5722(4) | 2670(2) | 924(1)  | 15(1) |
| C(21)  | 2576(4) | 1186(2) | 1285(1) | 20(1) |
| C(22)  | 4214(4) | 1849(2) | 1738(1) | 17(1) |
| C(23)  | 6177(4) | 1364(2) | 1884(1) | 24(1) |
| C(24)  | 7890(4) | 2260(2) | 2137(1) | 27(1) |
| C(25)  | 6965(4) | 3230(2) | 2028(1) | 22(1) |
| C(26)  | 5057(4) | 2869(2) | 1558(1) | 16(1) |
| C(27)  | 3411(4) | 3617(2) | 1599(1) | 18(1) |
| C(28)  | 4219(4) | 4659(2) | 1471(1) | 21(1) |
| C(29)  | 2722(4) | 5441(2) | 1529(1) | 18(1) |
| C(30)  | 3393(4) | 6433(2) | 1827(1) | 21(1) |
| C(31)  | 2049(4) | 7166(2) | 1876(1) | 25(1) |
| C(32)  | -7(4)   | 6927(2) | 1629(1) | 26(1) |
| C(33)  | -689(4) | 5951(2) | 1328(1) | 26(1) |
| C(34)  | 644(4)  | 5209(2) | 1282(1) | 23(1) |
| C(35)  | 7617(4) | 2262(2) | 171(1)  | 24(1) |
| C(36)  | 5453(4) | 2521(2) | -69(1)  | 19(1) |
| C(37)  | 7693(5) | 1120(2) | 109(1)  | 40(1) |
| C(38)  | 9428(4) | 2782(3) | -62(1)  | 43(1) |
| C(39)  | 5514(5) | 3600(2) | -188(1) | 33(1) |
| C(40)  | 4339(4) | 1753(2) | -595(1) | 30(1) |

---

X-ray crystallographic data for compound  
**2-((1*R*,2*R*)-2-benzyl-1-cyclohexylcyclopentyl)-4,4,5,5-tetramethyl-1,3,2-dioxaborolane**

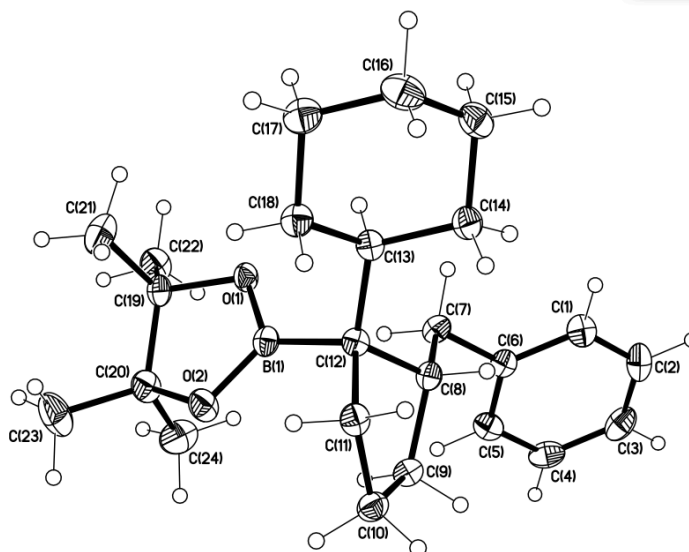

(Compound 17).

Table S4.

Crystal data and structure refinement for

**2-((1*R*,2*R*)-2-benzyl-1-cyclohexylcyclopentyl)-4,4,5,5-tetramethyl-1,3,2-dioxaborolane (Compound 17).**

|                                 |                                                                        |                              |
|---------------------------------|------------------------------------------------------------------------|------------------------------|
| Identification code             | C24H37BO2                                                              |                              |
| Empirical formula               | C <sub>24</sub> H <sub>37</sub> B O <sub>2</sub>                       |                              |
| Formula weight                  | 368.34                                                                 |                              |
| Temperature                     | 100(2) K                                                               |                              |
| Wavelength                      | 0.71073 $\approx$                                                      |                              |
| Crystal system                  | Monoclinic                                                             |                              |
| Space group                     | P2 <sub>1</sub>                                                        |                              |
| Unit cell dimensions            | a = 9.6816(10) $\approx$                                               | $\alpha = 90^\circ$ .        |
|                                 | b = 18.2436(19) $\approx$                                              | $\beta = 106.083(2)^\circ$ . |
|                                 | c = 12.6856(13) $\approx$                                              | $\gamma = 90^\circ$ .        |
| Volume                          | 2152.9(4) $\approx^3$                                                  |                              |
| Z                               | 4                                                                      |                              |
| Density (calculated)            | 1.136 Mg/m <sup>3</sup>                                                |                              |
| Absorption coefficient          | 0.069 mm <sup>-1</sup>                                                 |                              |
| F(000)                          | 808                                                                    |                              |
| Crystal size                    | 0.400 x 0.250 x 0.180 mm <sup>3</sup>                                  |                              |
| Theta range for data collection | 1.671 to 28.339 $^\circ$ .                                             |                              |
| Index ranges                    | -12 $\leq$ h $\leq$ 12, -24 $\leq$ k $\leq$ 24, -16 $\leq$ l $\leq$ 16 |                              |

|                                   |                                             |
|-----------------------------------|---------------------------------------------|
| Reflections collected             | 38756                                       |
| Independent reflections           | 10716 [R(int) = 0.0408]                     |
| Completeness to theta = 25.242°   | 100.0 %                                     |
| Absorption correction             | Semi-empirical from equivalents             |
| Max. and min. transmission        | 0.7457 and 0.6888                           |
| Refinement method                 | Full-matrix least-squares on F <sup>2</sup> |
| Data / restraints / parameters    | 10716 / 1 / 496                             |
| Goodness-of-fit on F <sup>2</sup> | 1.057                                       |
| Final R indices [I > 2sigma(I)]   | R1 = 0.0443, wR2 = 0.0949                   |
| R indices (all data)              | R1 = 0.0609, wR2 = 0.1035                   |
| Extinction coefficient            | na                                          |
| Largest diff. peak and hole       | 0.249 and -0.204 e. <sup>≈3</sup>           |

**Table S5.**

Atomic coordinates ( $\times 10^4$ ) and equivalent isotropic displacement parameters ( $\approx 2 \times 10^3$ ) for c24h37bo2.  $U(\text{eq})$  is defined as one third of the trace of the orthogonalized  $U^{ij}$  tensor.

|       | x        | y       | z        | U(eq) |
|-------|----------|---------|----------|-------|
| O(1)  | 6063(2)  | 4076(1) | 7419(1)  | 19(1) |
| O(2)  | 6763(2)  | 5252(1) | 7239(1)  | 24(1) |
| B(1)  | 6938(3)  | 4526(2) | 7027(2)  | 18(1) |
| C(1)  | 11365(3) | 2530(1) | 8609(2)  | 25(1) |
| C(2)  | 12672(3) | 2314(2) | 9307(2)  | 29(1) |
| C(3)  | 13283(3) | 2698(2) | 10260(2) | 29(1) |
| C(4)  | 12581(3) | 3300(2) | 10513(2) | 28(1) |
| C(5)  | 11273(3) | 3523(1) | 9810(2)  | 23(1) |
| C(6)  | 10647(2) | 3139(1) | 8850(2)  | 19(1) |
| C(7)  | 9233(2)  | 3383(1) | 8077(2)  | 21(1) |
| C(8)  | 9426(2)  | 3951(1) | 7244(2)  | 18(1) |
| C(9)  | 10151(2) | 4665(1) | 7754(2)  | 20(1) |
| C(10) | 9808(2)  | 5230(1) | 6811(2)  | 23(1) |
| C(11) | 8642(2)  | 4870(1) | 5868(2)  | 20(1) |
| C(12) | 8029(2)  | 4227(1) | 6396(2)  | 17(1) |
| C(13) | 7216(2)  | 3644(1) | 5562(2)  | 18(1) |
| C(14) | 8149(3)  | 3167(1) | 5037(2)  | 23(1) |
| C(15) | 7238(3)  | 2616(1) | 4224(2)  | 27(1) |
| C(16) | 6051(3)  | 2994(2) | 3343(2)  | 31(1) |
| C(17) | 5109(3)  | 3456(1) | 3861(2)  | 26(1) |
| C(18) | 6018(2)  | 4008(1) | 4658(2)  | 21(1) |
| C(19) | 5048(2)  | 4539(1) | 7778(2)  | 21(1) |
| C(20) | 5866(3)  | 5281(1) | 7999(2)  | 24(1) |
| C(21) | 3694(3)  | 4582(2) | 6819(2)  | 33(1) |
| C(22) | 4731(3)  | 4186(1) | 8765(2)  | 28(1) |
| C(23) | 4945(3)  | 5960(2) | 7749(2)  | 38(1) |
| C(24) | 6899(3)  | 5330(2) | 9148(2)  | 35(1) |
| O(3)  | 1073(2)  | 6054(1) | 2477(1)  | 20(1) |
| O(4)  | 1855(2)  | 4917(1) | 2164(1)  | 23(1) |



|       |         |         |          |       |
|-------|---------|---------|----------|-------|
| B(2)  | 1950(3) | 5655(1) | 2006(2)  | 18(1) |
| C(25) | 6537(3) | 7496(1) | 3698(2)  | 26(1) |
| C(26) | 7861(3) | 7636(2) | 4440(2)  | 33(1) |
| C(27) | 8243(3) | 7291(2) | 5448(2)  | 32(1) |
| C(28) | 7300(3) | 6804(1) | 5718(2)  | 29(1) |
| C(29) | 5981(3) | 6663(1) | 4973(2)  | 24(1) |
| C(30) | 5581(2) | 7007(1) | 3951(2)  | 20(1) |
| C(31) | 4174(2) | 6830(1) | 3121(2)  | 20(1) |
| C(32) | 4379(2) | 6281(1) | 2263(2)  | 18(1) |
| C(33) | 5108(2) | 5562(1) | 2723(2)  | 22(1) |
| C(34) | 4916(3) | 5073(1) | 1708(2)  | 24(1) |
| C(35) | 3644(2) | 5405(1) | 814(2)   | 20(1) |
| C(36) | 2997(2) | 6011(1) | 1393(2)  | 16(1) |
| C(37) | 2178(2) | 6619(1) | 607(2)   | 17(1) |
| C(38) | 3124(3) | 7113(1) | 117(2)   | 22(1) |
| C(39) | 2237(3) | 7686(1) | -658(2)  | 28(1) |
| C(40) | 1044(3) | 7337(2) | -1563(2) | 32(1) |
| C(41) | 82(3)   | 6861(2) | -1076(2) | 28(1) |
| C(42) | 968(3)  | 6282(1) | -312(2)  | 22(1) |
| C(43) | 556(2)  | 5554(1) | 3189(2)  | 22(1) |
| C(44) | 711(3)  | 4793(1) | 2691(2)  | 23(1) |
| C(45) | -962(3) | 5768(2) | 3167(2)  | 31(1) |
| C(46) | 1562(3) | 5657(2) | 4346(2)  | 33(1) |
| C(47) | -614(3) | 4567(2) | 1789(2)  | 36(1) |
| C(48) | 1180(3) | 4174(2) | 3511(2)  | 35(1) |

---

X-ray crystallographic data for compound  
**2-((1*R*,2*R*)-2-benzyl-1-phenethylcyclopentyl)-4,4,5,5-tetramethyl-1,3,2-dioxaborolane**  
**(Compound 15, major diastereomer).**

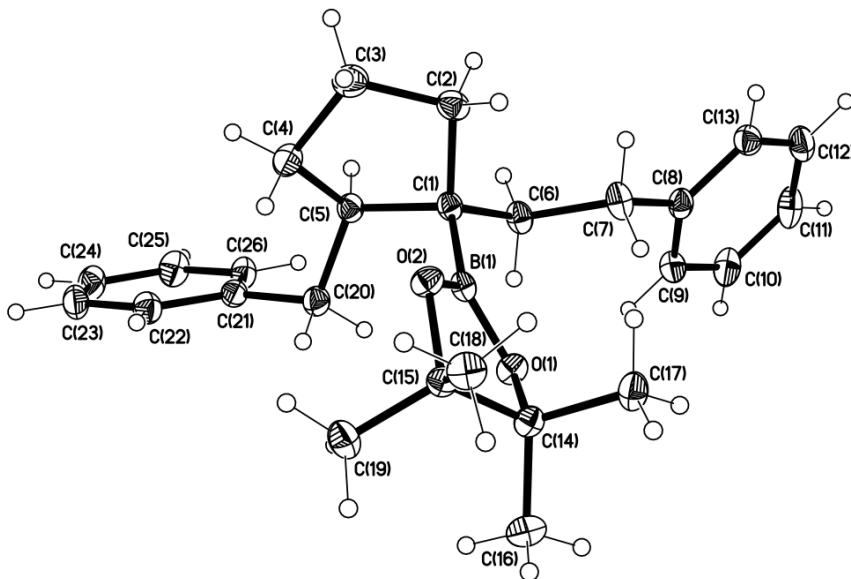

**Table S6.**

Crystal data and structure refinement for  
**2-((1*R*,2*R*)-2-benzyl-1-phenethylcyclopentyl)-4,4,5,5-tetramethyl-1,3,2-dioxaborolane**  
**(Compound 15, major diastereomer).**

|                        |                           |                             |
|------------------------|---------------------------|-----------------------------|
| Identification code    | C26H35BO2                 |                             |
| Empirical formula      | C26 H35 B O2              |                             |
| Formula weight         | 390.35                    |                             |
| Temperature            | 100(2) K                  |                             |
| Wavelength             | 0.71073 $\approx$         |                             |
| Crystal system         | Monoclinic                |                             |
| Space group            | P2 <sub>1</sub> /n        |                             |
| Unit cell dimensions   | a = 11.0652(19) $\approx$ | $\alpha = 90^\circ$ .       |
|                        | b = 17.228(3) $\approx$   | $\beta = 98.660(3)^\circ$ . |
|                        | c = 11.842(2) $\approx$   | $\gamma = 90^\circ$ .       |
| Volume                 | 2231.7(7) $\approx^3$     |                             |
| Z                      | 4                         |                             |
| Density (calculated)   | 1.162 Mg/m <sup>3</sup>   |                             |
| Absorption coefficient | 0.070 mm <sup>-1</sup>    |                             |

|                                   |                                             |
|-----------------------------------|---------------------------------------------|
| F(000)                            | 848                                         |
| Crystal size                      | 0.530 x 0.400 x 0.220 mm <sup>3</sup>       |
| Theta range for data collection   | 2.103 to 28.324°.                           |
| Index ranges                      | -14<=h<=14, -22<=k<=20, -15<=l<=15          |
| Reflections collected             | 43822                                       |
| Independent reflections           | 5557 [R(int) = 0.0352]                      |
| Completeness to theta = 25.242°   | 100.0 %                                     |
| Absorption correction             | Semi-empirical from equivalents             |
| Max. and min. transmission        | 0.7457 and 0.7070                           |
| Refinement method                 | Full-matrix least-squares on F <sup>2</sup> |
| Data / restraints / parameters    | 5557 / 0 / 266                              |
| Goodness-of-fit on F <sup>2</sup> | 1.048                                       |
| Final R indices [I>2sigma(I)]     | R1 = 0.0386, wR2 = 0.0983                   |
| R indices (all data)              | R1 = 0.0474, wR2 = 0.1046                   |
| Extinction coefficient            | na                                          |
| Largest diff. peak and hole       | 0.390 and -0.188 e. <sup>-3</sup>           |

**Table S7.**

Atomic coordinates ( $\times 10^4$ ) and equivalent isotropic displacement parameters ( $\approx 2 \times 10^3$ ) for C<sub>26</sub>H<sub>35</sub>BO<sub>2</sub>. U(eq) is defined as one third of the trace of the orthogonalized U<sup>ij</sup> tensor.

|       | x        | y       | z       | U(eq) |
|-------|----------|---------|---------|-------|
| B(1)  | 3744(1)  | 6957(1) | 6459(1) | 16(1) |
| C(1)  | 4240(1)  | 6174(1) | 6004(1) | 16(1) |
| C(2)  | 3572(1)  | 5462(1) | 6436(1) | 20(1) |
| C(3)  | 4263(1)  | 5252(1) | 7628(1) | 25(1) |
| C(4)  | 5459(1)  | 5724(1) | 7780(1) | 21(1) |
| C(5)  | 5581(1)  | 6018(1) | 6580(1) | 17(1) |
| C(6)  | 4146(1)  | 6187(1) | 4692(1) | 19(1) |
| C(7)  | 2834(1)  | 6200(1) | 4049(1) | 22(1) |
| C(8)  | 2736(1)  | 6139(1) | 2762(1) | 19(1) |
| C(9)  | 3493(1)  | 6557(1) | 2143(1) | 24(1) |
| C(10) | 3359(1)  | 6505(1) | 960(1)  | 28(1) |
| C(11) | 2472(1)  | 6028(1) | 371(1)  | 28(1) |
| C(12) | 1717(1)  | 5606(1) | 971(1)  | 26(1) |
| C(13) | 1848(1)  | 5658(1) | 2154(1) | 21(1) |
| C(14) | 2901(1)  | 8165(1) | 6432(1) | 17(1) |
| C(15) | 3167(1)  | 7859(1) | 7684(1) | 17(1) |
| C(16) | 3325(1)  | 8988(1) | 6262(1) | 25(1) |
| C(17) | 1568(1)  | 8068(1) | 5898(1) | 23(1) |
| C(18) | 2107(1)  | 7938(1) | 8356(1) | 22(1) |
| C(19) | 4338(1)  | 8192(1) | 8354(1) | 24(1) |
| C(20) | 6468(1)  | 6702(1) | 6570(1) | 19(1) |
| C(21) | 7791(1)  | 6466(1) | 6917(1) | 18(1) |
| C(22) | 8387(1)  | 6573(1) | 8030(1) | 22(1) |
| C(23) | 9608(1)  | 6368(1) | 8336(1) | 25(1) |
| C(24) | 10256(1) | 6054(1) | 7529(1) | 26(1) |
| C(25) | 9672(1)  | 5936(1) | 6420(1) | 26(1) |
| C(26) | 8448(1)  | 6137(1) | 6121(1) | 22(1) |
| O(1)  | 3615(1)  | 7630(1) | 5831(1) | 18(1) |
| O(2)  | 3387(1)  | 7033(1) | 7515(1) | 18(1) |

X-ray crystallographic data for  
**4,4,5,5-tetramethyl-2-((1*R*,2*R*)-1-phenethyl-2-((*R*)-1-phenylbut-3-en-1-yl)cyclopentyl)-1,3,2-dioxaborolane (Compound 38).**

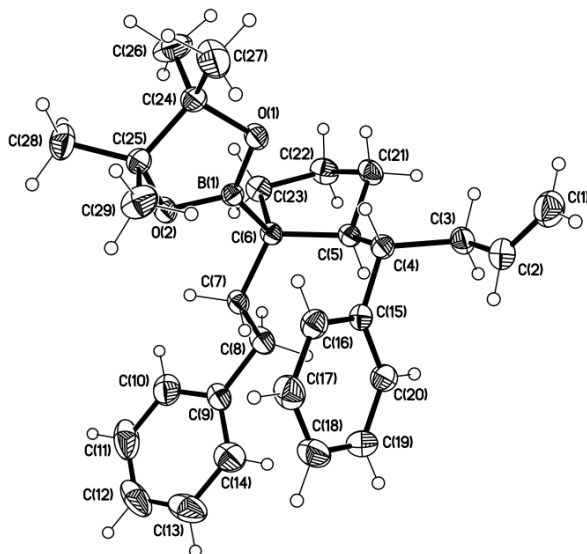

**Table S8.**

Crystal data and structure refinement for  
**4,4,5,5-tetramethyl-2-((1*R*,2*R*)-1-phenethyl-2-((*R*)-1-phenylbut-3-en-1-yl)cyclopentyl)-1,3,2-dioxaborolane (Compound 38).**

|                        |                                                 |                              |
|------------------------|-------------------------------------------------|------------------------------|
| Identification code    | C29H39BO2                                       |                              |
| Empirical formula      | C <sub>29</sub> H <sub>39</sub> BO <sub>2</sub> |                              |
| Formula weight         | 430.41                                          |                              |
| Temperature            | 173(2) K                                        |                              |
| Wavelength             | 1.54178 $\approx$                               |                              |
| Crystal system         | Triclinic                                       |                              |
| Space group            | P-1                                             |                              |
| Unit cell dimensions   | a = 9.9886(5) $\approx$                         | $\alpha = 69.073(2)^\circ$ . |
|                        | b = 10.2525(5) $\approx$                        | $\beta = 84.917(2)^\circ$ .  |
|                        | c = 13.6756(7) $\approx$                        | $\gamma = 76.535(2)^\circ$ . |
| Volume                 | 1272.13(11) $\approx^3$                         |                              |
| Z                      | 2                                               |                              |
| Density (calculated)   | 1.124 Mg/m <sup>3</sup>                         |                              |
| Absorption coefficient | 0.516 mm <sup>-1</sup>                          |                              |

|                                   |                                             |
|-----------------------------------|---------------------------------------------|
| F(000)                            | 468                                         |
| Crystal size                      | 0.520 x 0.400 x 0.080 mm <sup>3</sup>       |
| Theta range for data collection   | 3.460 to 66.686°.                           |
| Index ranges                      | -11<=h<=11, -12<=k<=12, -16<=l<=16          |
| Reflections collected             | 24493                                       |
| Independent reflections           | 4448 [R(int) = 0.0249]                      |
| Completeness to theta = 66.750°   | 98.8 %                                      |
| Absorption correction             | Semi-empirical from equivalents             |
| Max. and min. transmission        | 0.7528 and 0.6785                           |
| Refinement method                 | Full-matrix least-squares on F <sup>2</sup> |
| Data / restraints / parameters    | 4448 / 0 / 293                              |
| Goodness-of-fit on F <sup>2</sup> | 1.027                                       |
| Final R indices [I>2sigma(I)]     | R1 = 0.0393, wR2 = 0.0981                   |
| R indices (all data)              | R1 = 0.0407, wR2 = 0.0993                   |
| Extinction coefficient            | na                                          |
| Largest diff. peak and hole       | 0.313 and -0.208 e. <sup>-3</sup>           |

**Table S9.**

Atomic coordinates ( $\times 10^4$ ) and equivalent isotropic displacement parameters ( $\approx 2 \times 10^3$ ) for C<sub>29</sub>H<sub>39</sub>BO<sub>2</sub>. U(eq) is defined as one third of the trace of the orthogonalized U<sup>ij</sup> tensor.

|       | x       | y       | z       | U(eq) |
|-------|---------|---------|---------|-------|
| O(1)  | 1652(1) | 3532(1) | 4221(1) | 33(1) |
| O(2)  | 3289(1) | 1550(1) | 4287(1) | 28(1) |
| B(1)  | 2635(1) | 2887(1) | 3680(1) | 22(1) |
| C(1)  | 2312(2) | 9366(2) | 2921(1) | 47(1) |
| C(2)  | 3111(1) | 8405(1) | 2586(1) | 38(1) |
| C(3)  | 2640(1) | 7591(1) | 2017(1) | 31(1) |
| C(4)  | 3085(1) | 5954(1) | 2560(1) | 25(1) |
| C(5)  | 2623(1) | 5150(1) | 1936(1) | 24(1) |
| C(6)  | 2891(1) | 3481(1) | 2455(1) | 23(1) |
| C(7)  | 4324(1) | 2676(1) | 2218(1) | 25(1) |
| C(8)  | 4718(1) | 2968(1) | 1061(1) | 36(1) |
| C(9)  | 6021(1) | 1925(1) | 966(1)  | 34(1) |
| C(10) | 5970(2) | 619(2)  | 909(1)  | 47(1) |
| C(11) | 7174(2) | -372(2) | 882(1)  | 66(1) |
| C(12) | 8432(2) | -70(2)  | 912(1)  | 70(1) |
| C(13) | 8499(2) | 1219(2) | 968(1)  | 62(1) |
| C(14) | 7301(2) | 2214(2) | 996(1)  | 45(1) |
| C(15) | 4629(1) | 5496(1) | 2730(1) | 26(1) |
| C(16) | 5180(1) | 4679(1) | 3714(1) | 32(1) |
| C(17) | 6591(1) | 4191(2) | 3858(1) | 42(1) |
| C(18) | 7480(1) | 4540(2) | 3019(1) | 44(1) |
| C(19) | 6948(1) | 5389(2) | 2037(1) | 41(1) |
| C(20) | 5542(1) | 5858(1) | 1894(1) | 33(1) |
| C(21) | 1088(1) | 5601(1) | 1657(1) | 31(1) |
| C(22) | 902(1)  | 4471(1) | 1239(1) | 35(1) |
| C(23) | 1712(1) | 3076(1) | 1998(1) | 30(1) |
| C(24) | 1417(1) | 2419(1) | 5208(1) | 32(1) |
| C(25) | 2800(1) | 1298(1) | 5365(1) | 27(1) |
| C(26) | 222(1)  | 1858(2) | 5013(1) | 58(1) |

|       |         |         |         |       |
|-------|---------|---------|---------|-------|
| C(27) | 1065(2) | 3067(2) | 6056(1) | 59(1) |
| C(28) | 2684(2) | -255(1) | 5849(1) | 43(1) |
| C(29) | 3884(1) | 1544(2) | 5945(1) | 43(1) |

X-ray crystallographic data for compound 2-((1*R*,2*R*)-2-((*R*)-1,2-diphenylethyl)-1-phenethylcyclopentyl)-4,4,5,5-tetramethyl-1,3,2-dioxaborolane (Compound 16).

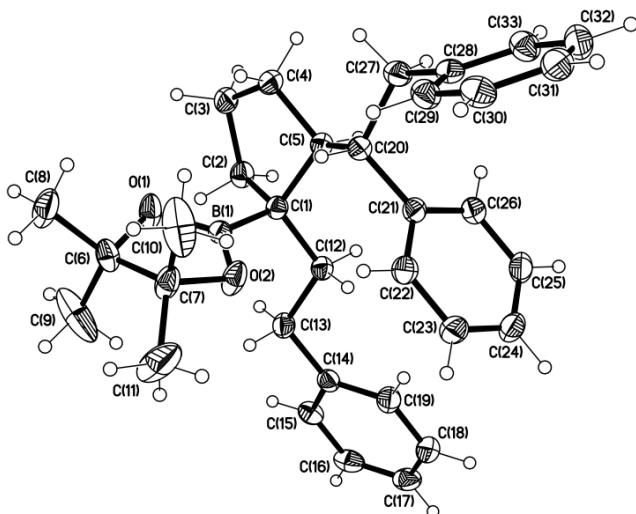

**Table S10.**

Crystal data and structure refinement for 2-((1*R*,2*R*)-2-((*R*)-1,2-diphenylethyl)-1-phenethylcyclopentyl)-4,4,5,5-tetramethyl-1,3,2-dioxaborolane (Compound 16).

|                      |                           |                       |
|----------------------|---------------------------|-----------------------|
| Identification code  | C33H41BO2                 |                       |
| Empirical formula    | C33 H41BO2                |                       |
| Formula weight       | 480.47                    |                       |
| Temperature          | 100(2) K                  |                       |
| Wavelength           | 0.71073 $\approx$         |                       |
| Crystal system       | Orthorhombic              |                       |
| Space group          | Pbca                      |                       |
| Unit cell dimensions | a = 13.8342(16) $\approx$ | $\alpha = 90^\circ$ . |
|                      | b = 17.292(2) $\approx$   | $\beta = 90^\circ$ .  |
|                      | c = 23.666(3) $\approx$   | $\gamma = 90^\circ$ . |



|                                         |                                                                  |
|-----------------------------------------|------------------------------------------------------------------|
| Volume                                  | 5661.4(11) $\text{\AA}^3$                                        |
| Z                                       | 8                                                                |
| Density (calculated)                    | 1.127 $\text{Mg/m}^3$                                            |
| Absorption coefficient                  | 0.067 $\text{mm}^{-1}$                                           |
| F(000)                                  | 2080                                                             |
| Crystal size                            | 0.550 x 0.380 x 0.180 $\text{mm}^3$                              |
| Theta range for data collection         | 1.721 to 28.335 $^\circ$ .                                       |
| Index ranges                            | -18 $\leq h \leq$ 18, -23 $\leq k \leq$ 22, -31 $\leq l \leq$ 31 |
| Reflections collected                   | 94700                                                            |
| Independent reflections                 | 7044 [R(int) = 0.0525]                                           |
| Completeness to theta = 25.242 $^\circ$ | 100.0 %                                                          |
| Absorption correction                   | Semi-empirical from equivalents                                  |
| Max. and min. transmission              | 0.7457 and 0.7017                                                |
| Refinement method                       | Full-matrix least-squares on F <sup>2</sup>                      |
| Data / restraints / parameters          | 7044 / 821 / 406                                                 |
| Goodness-of-fit on F <sup>2</sup>       | 1.028                                                            |
| Final R indices [I > 2 $\sigma$ (I)]    | R1 = 0.0439, wR2 = 0.1041                                        |
| R indices (all data)                    | R1 = 0.0649, wR2 = 0.1172                                        |
| Extinction coefficient                  | na                                                               |
| Largest diff. peak and hole             | 0.320 and -0.237 $\text{e.}\text{\AA}^{-3}$                      |

**Table S11.**

Atomic coordinates ( $\times 10^4$ ) and equivalent isotropic displacement parameters ( $\approx 2 \times 10^3$ ) for C<sub>33</sub>H<sub>41</sub>BO<sub>2</sub>. U(eq) is defined as one third of the trace of the orthogonalized U<sup>ij</sup> tensor.

|        | x        | y        | z        | U(eq) |
|--------|----------|----------|----------|-------|
| O(1)   | 5645(1)  | 1765(1)  | 4124(1)  | 33(1) |
| O(2)   | 5909(1)  | 2977(1)  | 4455(1)  | 33(1) |
| C(6)   | 5676(1)  | 1686(1)  | 4741(1)  | 27(1) |
| C(7)   | 5546(1)  | 2534(1)  | 4940(1)  | 31(1) |
| C(8)   | 4873(2)  | 1142(1)  | 4932(1)  | 42(1) |
| C(9)   | 6661(2)  | 1356(2)  | 4881(1)  | 72(1) |
| C(10)  | 4480(2)  | 2753(1)  | 5008(1)  | 57(1) |
| C(11)  | 6116(3)  | 2768(2)  | 5452(1)  | 75(1) |
| O(1X)  | 5206(10) | 1976(8)  | 4159(4)  | 36(3) |
| O(2X)  | 6309(10) | 2822(9)  | 4479(5)  | 32(3) |
| C(6X)  | 5140(10) | 1968(9)  | 4782(5)  | 43(3) |
| C(7X)  | 6040(10) | 2389(9)  | 4986(5)  | 37(3) |
| C(8X)  | 4178(15) | 2328(17) | 4931(12) | 84(7) |
| C(9X)  | 5248(19) | 1109(11) | 4917(13) | 53(6) |
| C(10X) | 5920(30) | 2950(18) | 5468(12) | 49(5) |
| C(11X) | 6951(15) | 1978(16) | 5134(11) | 82(6) |
| B(1)   | 5869(1)  | 2514(1)  | 3994(1)  | 21(1) |
| C(1)   | 6077(1)  | 2810(1)  | 3372(1)  | 20(1) |
| C(2)   | 6219(1)  | 2117(1)  | 2963(1)  | 25(1) |
| C(3)   | 5199(1)  | 1834(1)  | 2804(1)  | 29(1) |
| C(4)   | 4509(1)  | 2497(1)  | 2966(1)  | 26(1) |
| C(5)   | 5157(1)  | 3196(1)  | 3107(1)  | 21(1) |
| C(12)  | 6954(1)  | 3358(1)  | 3365(1)  | 21(1) |
| C(13)  | 7903(1)  | 2997(1)  | 3563(1)  | 24(1) |
| C(14)  | 8758(1)  | 3546(1)  | 3539(1)  | 22(1) |
| C(15)  | 9683(1)  | 3258(1)  | 3433(1)  | 26(1) |
| C(16)  | 10479(1) | 3747(1)  | 3407(1)  | 31(1) |
| C(17)  | 10366(1) | 4538(1)  | 3484(1)  | 32(1) |
| C(18)  | 9455(1)  | 4833(1)  | 3593(1)  | 31(1) |

|       |         |         |         |       |
|-------|---------|---------|---------|-------|
| C(19) | 8658(1) | 4343(1) | 3621(1) | 28(1) |
| C(20) | 4625(1) | 3832(1) | 3443(1) | 22(1) |
| C(21) | 5249(1) | 4538(1) | 3565(1) | 22(1) |
| C(22) | 5498(1) | 4731(1) | 4119(1) | 25(1) |
| C(23) | 6105(1) | 5355(1) | 4232(1) | 30(1) |
| C(24) | 6456(1) | 5803(1) | 3793(1) | 32(1) |
| C(25) | 6198(1) | 5629(1) | 3242(1) | 30(1) |
| C(26) | 5598(1) | 5003(1) | 3128(1) | 26(1) |
| C(27) | 3697(1) | 4073(1) | 3121(1) | 27(1) |
| C(28) | 3181(1) | 4766(1) | 3368(1) | 25(1) |
| C(29) | 2927(1) | 4793(1) | 3938(1) | 28(1) |
| C(30) | 2451(1) | 5429(1) | 4162(1) | 32(1) |
| C(31) | 2214(1) | 6049(1) | 3818(1) | 33(1) |
| C(32) | 2465(1) | 6032(1) | 3253(1) | 34(1) |
| C(33) | 2947(1) | 5397(1) | 3030(1) | 31(1) |

X-ray crystallographic data for  
**2-((1*S*,2*S*,3*R*)-3-(benzyloxy)-2-(*tert*-butoxymethyl)-1-phenethylcyclopentyl)-4,4,5,5-tetramethyl-1,3,2-dioxaborolane (Compound S13).**

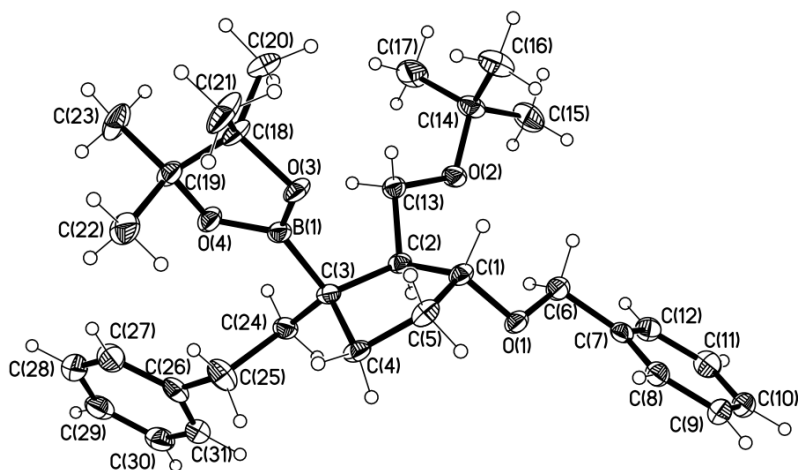

**Table S12.**

Crystal data and structure refinement for  
**2-((1*S*,2*S*,3*R*)-3-(benzyloxy)-2-(*tert*-butoxymethyl)-1-phenethylcyclopentyl)-4,4,5,5-tetramethyl-1,3,2-dioxaborolane (Compound S13).**

**hyl-1,3,2-dioxaborolane (Compound S13).**

|                                         |                                                                                                                                                   |
|-----------------------------------------|---------------------------------------------------------------------------------------------------------------------------------------------------|
| Identification code                     | C31H45BO4                                                                                                                                         |
| Empirical formula                       | C31 H45 B O4                                                                                                                                      |
| Formula weight                          | 492.48                                                                                                                                            |
| Temperature                             | 100(2) K                                                                                                                                          |
| Wavelength                              | 1.54178 $\approx$                                                                                                                                 |
| Crystal system                          | Orthorhombic                                                                                                                                      |
| Space group                             | Pna2 <sub>1</sub>                                                                                                                                 |
| Unit cell dimensions                    | a = 26.2433(11) $\approx$ $\alpha = 90^\circ$ .<br>b = 17.5408(7) $\approx$ $\beta = 90^\circ$ .<br>c = 6.2731(3) $\approx$ $\gamma = 90^\circ$ . |
| Volume                                  | 2887.7(2) $\approx^3$                                                                                                                             |
| Z                                       | 4                                                                                                                                                 |
| Density (calculated)                    | 1.133 Mg/m <sup>3</sup>                                                                                                                           |
| Absorption coefficient                  | 0.564 mm <sup>-1</sup>                                                                                                                            |
| F(000)                                  | 1072                                                                                                                                              |
| Crystal size                            | 0.360 x 0.240 x 0.180 mm <sup>3</sup>                                                                                                             |
| Theta range for data collection         | 3.030 to 69.934 $^\circ$ .                                                                                                                        |
| Index ranges                            | -31 $\leq$ h $\leq$ 31, -21 $\leq$ k $\leq$ 18, -6 $\leq$ l $\leq$ 7                                                                              |
| Reflections collected                   | 22546                                                                                                                                             |
| Independent reflections                 | 4866 [R(int) = 0.0631]                                                                                                                            |
| Completeness to theta = 67.679 $^\circ$ | 100.0 %                                                                                                                                           |
| Absorption correction                   | Semi-empirical from equivalents                                                                                                                   |
| Max. and min. transmission              | 0.7533 and 0.5608                                                                                                                                 |
| Refinement method                       | Full-matrix least-squares on F <sup>2</sup>                                                                                                       |
| Data / restraints / parameters          | 4866 / 393 / 401                                                                                                                                  |
| Goodness-of-fit on F <sup>2</sup>       | 1.057                                                                                                                                             |
| Final R indices [I > 2 $\sigma$ (I)]    | R1 = 0.0352, wR2 = 0.0899                                                                                                                         |
| R indices (all data)                    | R1 = 0.0368, wR2 = 0.0912                                                                                                                         |
| Absolute structure parameter            | 0.06(12)                                                                                                                                          |
| Extinction coefficient                  | n/a                                                                                                                                               |
| Largest diff. peak and hole             | 0.189 and -0.169 e. $\approx^3$                                                                                                                   |

**Table S13.**

Atomic coordinates ( $\times 10^4$ ) and equivalent isotropic displacement parameters ( $\approx 2 \times 10^3$ ) for C<sub>31</sub>H<sub>45</sub>BO<sub>4</sub>. U(eq) is defined as one third of the trace of the orthogonalized U<sup>ij</sup> tensor.

|       | x       | y        | z        | U(eq) |
|-------|---------|----------|----------|-------|
| O(1)  | 3636(1) | 6170(1)  | 3554(2)  | 21(1) |
| O(2)  | 3680(1) | 4596(1)  | 7018(2)  | 22(1) |
| B(1)  | 2301(1) | 4380(1)  | 3302(4)  | 20(1) |
| C(1)  | 3375(1) | 5467(1)  | 3104(3)  | 19(1) |
| C(2)  | 3037(1) | 5197(1)  | 4987(3)  | 18(1) |
| C(3)  | 2474(1) | 5196(1)  | 4159(3)  | 18(1) |
| C(4)  | 2499(1) | 5778(1)  | 2310(3)  | 21(1) |
| C(5)  | 3011(1) | 5617(1)  | 1255(3)  | 22(1) |
| C(6)  | 4045(1) | 6079(1)  | 5011(4)  | 22(1) |
| C(7)  | 4374(1) | 6783(1)  | 5004(3)  | 20(1) |
| C(8)  | 4436(1) | 7217(1)  | 3181(4)  | 22(1) |
| C(9)  | 4763(1) | 7844(1)  | 3176(4)  | 26(1) |
| C(10) | 5036(1) | 8028(1)  | 5001(4)  | 27(1) |
| C(11) | 4976(1) | 7596(1)  | 6831(4)  | 28(1) |
| C(12) | 4643(1) | 6977(1)  | 6840(4)  | 24(1) |
| C(13) | 3210(1) | 4446(1)  | 5971(3)  | 20(1) |
| C(14) | 3998(1) | 3956(1)  | 7578(4)  | 26(1) |
| C(15) | 4426(1) | 4324(1)  | 8857(4)  | 38(1) |
| C(16) | 4212(1) | 3580(1)  | 5589(4)  | 38(1) |
| C(17) | 3708(1) | 3388(1)  | 8954(5)  | 39(1) |
| O(3)  | 2500(2) | 4007(2)  | 1709(8)  | 22(1) |
| C(18) | 2256(2) | 3251(2)  | 1658(8)  | 25(1) |
| C(19) | 1744(2) | 3408(2)  | 2781(6)  | 22(1) |
| O(4)  | 1884(2) | 4016(2)  | 4264(6)  | 22(1) |
| C(20) | 2606(3) | 2722(5)  | 2866(16) | 36(2) |
| C(21) | 2217(8) | 3017(12) | -680(20) | 43(4) |
| C(22) | 1342(2) | 3742(3)  | 1316(12) | 35(1) |
| C(23) | 1527(7) | 2728(7)  | 3990(30) | 36(3) |
| O(3X) | 2323(2) | 4150(2)  | 1138(7)  | 24(1) |

*Liu, Deaton & Morken, Supporting Information*

|        |         |          |          |       |
|--------|---------|----------|----------|-------|
| C(18X) | 2014(2) | 3453(2)  | 974(8)   | 26(1) |
| C(19X) | 2053(2) | 3127(2)  | 3272(7)  | 22(1) |
| O(4X)  | 2122(2) | 3817(2)  | 4544(5)  | 18(1) |
| C(20X) | 2218(9) | 2932(12) | -710(20) | 32(3) |
| C(21X) | 1480(3) | 3709(4)  | 370(12)  | 36(2) |
| C(22X) | 1582(6) | 2724(7)  | 4070(20) | 28(3) |
| C(23X) | 2525(3) | 2630(5)  | 3601(14) | 26(2) |
| C(24)  | 2109(1) | 5444(1)  | 5954(3)  | 21(1) |
| C(25)  | 1567(1) | 5633(1)  | 5174(4)  | 33(1) |
| C(26)  | 1199(1) | 5684(1)  | 7013(4)  | 27(1) |
| C(27)  | 842(1)  | 5110(1)  | 7365(4)  | 32(1) |
| C(28)  | 530(1)  | 5128(1)  | 9155(5)  | 36(1) |
| C(29)  | 566(1)  | 5715(1)  | 10595(4) | 32(1) |
| C(30)  | 912(1)  | 6299(1)  | 10249(4) | 32(1) |
| C(31)  | 1223(1) | 6281(1)  | 8467(4)  | 29(1) |

---

## References

- <sup>1</sup>A. Spaggiari, D. Vaccari, P. Davoli, G. Torre, F. Prati, *J. Org. Chem.* **72**, 2216-2219 (2007).
- <sup>2</sup>K. Hong, X. Liu, J. P. Morken, *J. Am. Chem. Soc.* **136**, 10581-10584 (2014).
- <sup>3</sup>H. Li, X. Shangguan, Z. Zhang, S. Huang, Y. Zhang, J. Wang, *Org. Lett.* **16**, 448-451 (2014).
- <sup>4</sup>K. Hong, X. Liu, J. P. Morken, *J. Am. Chem. Soc.* **136**, 10581-10584 (2014).
- <sup>5</sup>K. Hong, X. Liu, J. P. Morken, *J. Am. Chem. Soc.* **136**, 10581-10584 (2014).
- <sup>6</sup>J. R. Coombs, L. Zhang, J. P. Morken, *Org. Lett.* **17**, 1708-1711 (2015).
- <sup>7</sup>K. Hong, X. Liu, J. P. Morken, *J. Am. Chem. Soc.* **136**, 10581-10584 (2014).
- <sup>8</sup>K. Hong, X. Liu, J. P. Morken, *J. Am. Chem. Soc.* **136**, 10581-10584 (2014).
- <sup>9</sup>A. F. Simpson, C. D. Bodkin, C. P. Butts, M. A. Armitage, T. Gallagher, *J. Chem. Soc., Perkin Trans. 1*, 3047-3054 (2000).
- <sup>10</sup>For preparation see: M. T. Crimmins, R. S. Al-awar, I. M. Vallin, W. G. Hollis, Jr., R. O'Mahony, J. G. Lever, D. M. Bankaitis-Davis, *J. Am. Chem. Soc.* **118**, 7513-7528 (1996).
- <sup>11</sup>J. Schreiber, H. Maag, N. Hashimoto, A. Eschenmoser, *Angew. Chem. Int. Ed.* **10**, 330-331 (1971).
- <sup>12</sup>R. P. Sonawane, V. Jheengut, C. Rabalakos, R. Larouche-Gauthier, H. K. Scott, Aggarwal, V. K. *Angew. Chem. Int. Ed.* **50**, 3760-3763 (2011).
- <sup>13</sup>J. D. White, D. C. Ihle, *Org. Lett.* **8**, 1081-1084 (2006).
- <sup>14</sup>M. Moriyasu, S. Takeuchi, M. Ichimaru, N. Nakatani, Y. Nishiyama, A. Kato, S. G. Mathenge, F. D. Juma, P. B. ChaloMutiso, *J. Nat. Med.* **66**, 453-458 (2012).
- <sup>15</sup>D. A. Evans, M. D. Ennis, T. Le, N. Mandel, G. Mandel, *J. Am. Chem. Soc.* **106**, 1155-1156 (1984).
- <sup>16</sup>Y. Minko, M. Pasco, L. Lercher, M. Botoshansky, I. Marek, *Nature* **490**, 522- 526 (2012)
- <sup>17</sup>G. C. Micalizio, A. N. Pinchuk, W. R. Roush, *J. Org. Chem.* **65**, 8730-8736 (2000).
- <sup>18</sup>A. M. Whittaker, G. Lalic, *Org. Lett.* **15**, 1112- 1115 (2013)
- <sup>19</sup>For preparation see: N. P. Mankad, D. S. Laitar, J. P. Sadighi, *Organometallics* **23**, 3369-3371 (2004).
- <sup>20</sup>K. Hong, X. Liu, J. P. Morken *J. Am. Chem. Soc.* **136**, 10581-10584 (2014).

## Computational Studies

All geometries were optimized using the m062x/6-31+G\* method. The geometry optimizations were carried out in THF solvent simulated by the polarizable dielectric continuum solvation method PCM. Frequency calculations were carried out using the m062x/6-31+G\* method on all optimized geometries to make sure that the stationary point geometries either have all real normal mode frequencies (minima) or one imaginary normal mode frequency (transition states). Gibbs free energies were computed using the unscaled normal mode frequencies at 1.0 atm and 298.15 K. All calculations were carried out with the Gaussian 09 computer program<sup>1</sup>.

GS

-----  
Cartesian coordinates (Angstroms):  
-----

37

|   |        |        |        |
|---|--------|--------|--------|
| H | -1.383 | -1.687 | -0.872 |
| H | -2.532 | -3.010 | -0.574 |
| C | -1.488 | -2.776 | -0.812 |
| H | -2.042 | -1.802 | -3.228 |
| H | -0.851 | -3.138 | 0.002  |
| H | 4.283  | -0.746 | -0.967 |
| H | 1.550  | -1.782 | -0.121 |
| C | -1.972 | -2.894 | -3.262 |
| H | -2.982 | -3.305 | -3.145 |
| C | -1.053 | -3.384 | -2.150 |
| O | 0.281  | -2.964 | -2.416 |
| C | 2.170  | 1.091  | 1.237  |
| C | 3.583  | -1.561 | -0.725 |
| H | -1.588 | -3.182 | -4.244 |
| C | 2.265  | -0.954 | -0.235 |
| H | -1.868 | -5.285 | -0.155 |
| B | 1.177  | -3.932 | -1.847 |
| H | -2.950 | -5.444 | -1.559 |
| C | 2.406  | -0.211 | 1.058  |
| C | -1.934 | -5.629 | -1.190 |
| C | -0.900 | -4.935 | -2.067 |



|   |        |        |        |
|---|--------|--------|--------|
| H | 1.858  | -0.286 | -1.008 |
| O | 0.391  | -5.080 | -1.484 |
| C | 3.378  | -2.486 | -1.947 |
| H | 2.857  | -1.888 | -2.713 |
| C | 2.623  | -3.768 | -1.680 |
| H | -1.760 | -6.711 | -1.201 |
| H | -1.867 | -5.554 | -3.934 |
| H | 4.379  | -2.688 | -2.366 |
| C | -0.881 | -5.584 | -3.455 |
| H | -0.158 | -5.082 | -4.106 |
| H | -0.580 | -6.632 | -3.351 |
| H | 4.039  | -2.145 | 0.089  |
| H | 3.222  | -4.582 | -1.260 |
| H | 2.748  | -0.804 | 1.910  |
| H | 1.834  | 1.721  | 0.415  |
| H | 2.303  | 1.571  | 2.203  |

|                                              | 1       | 2       | 3                           |
|----------------------------------------------|---------|---------|-----------------------------|
|                                              | A       | A       | A                           |
| Frequencies --                               | 24.6824 | 36.8523 | 69.5065                     |
| Red. masses --                               | 3.8973  | 3.7105  | 3.2201                      |
| Zero-point correction=                       |         |         | 0.326180 (Hartree/Particle) |
| Thermal correction to Energy=                |         |         | 0.343179                    |
| Thermal correction to Enthalpy=              |         |         | 0.344123                    |
| Thermal correction to Gibbs Free Energy=     |         |         | 0.281779                    |
| Sum of electronic and zero-point Energies=   |         |         | -645.375869                 |
| Sum of electronic and thermal Energies=      |         |         | -645.358870                 |
| Sum of electronic and thermal Enthalpies=    |         |         | -645.357926                 |
| Sum of electronic and thermal Free Energies= |         |         | -645.420270                 |

| Item          | Value    | Threshold | Converged? |
|---------------|----------|-----------|------------|
| Maximum Force | 0.000051 | 0.000450  | YES        |
| RMS Force     | 0.000008 | 0.000300  | YES        |

TS1\_SYN

-----  
 Cartesian coordinates (Angstroms):

-----  
37

|   |        |        |        |
|---|--------|--------|--------|
| H | -2.269 | -2.822 | -0.473 |
| H | -3.568 | -1.638 | -0.738 |
| C | -2.482 | -1.780 | -0.733 |
| H | -2.294 | -2.216 | 1.888  |
| H | -2.099 | -1.595 | -1.743 |
| H | 4.402  | -0.965 | -1.084 |
| H | 4.394  | -0.380 | 1.321  |
| C | -2.343 | -1.142 | 1.678  |
| H | -3.390 | -0.827 | 1.750  |
| C | -1.792 | -0.869 | 0.286  |
| O | -0.394 | -1.180 | 0.258  |
| C | 1.946  | 1.200  | 1.528  |
| C | 3.745  | -1.532 | -0.407 |
| H | -1.764 | -0.616 | 2.442  |
| C | 3.462  | -0.695 | 0.833  |
| H | -3.106 | 0.479  | -1.886 |
| B | 0.229  | -0.303 | -0.646 |
| H | -3.961 | 0.866  | -0.375 |
| C | 2.635  | 0.535  | 0.489  |
| C | -3.044 | 1.039  | -0.950 |
| C | -1.818 | 0.636  | -0.140 |
| H | 2.902  | -1.294 | 1.567  |
| O | -0.652 | 0.744  | -0.968 |
| C | 2.384  | -1.752 | -1.081 |
| H | 2.515  | -2.204 | -2.077 |
| C | 1.650  | -0.426 | -1.106 |
| H | -2.989 | 2.106  | -1.191 |
| H | -2.548 | 1.603  | 1.676  |
| H | 1.816  | -2.480 | -0.483 |
| C | -1.652 | 1.589  | 1.045  |
| H | -0.783 | 1.309  | 1.647  |
| H | -1.483 | 2.600  | 0.660  |
| H | 4.258  | -2.473 | -0.167 |
| H | 3.149  | 1.201  | -0.210 |
| H | 1.452  | 2.144  | 1.298  |
| H | 1.404  | 0.583  | 2.251  |
| H | 1.960  | 0.239  | -1.919 |

|                                              | 1         | 2           | 3                  |
|----------------------------------------------|-----------|-------------|--------------------|
|                                              | A         | A           | A                  |
| Frequencies --                               | -465.7393 | 66.9673     | 74.3594            |
| Red. masses --                               | 4.8610    | 3.3862      | 3.0315             |
| Zero-point correction=                       |           | 0.326377    | (Hartree/Particle) |
| Thermal correction to Energy=                |           | 0.341865    |                    |
| Thermal correction to Enthalpy=              |           | 0.342809    |                    |
| Thermal correction to Gibbs Free Energy=     |           | 0.285551    |                    |
| Sum of electronic and zero-point Energies=   |           | -645.346421 |                    |
| Sum of electronic and thermal Energies=      |           | -645.330933 |                    |
| Sum of electronic and thermal Enthalpies=    |           | -645.329989 |                    |
| Sum of electronic and thermal Free Energies= |           | -645.387247 |                    |

| Item          | Value    | Threshold | Converged? |
|---------------|----------|-----------|------------|
| Maximum Force | 0.000032 | 0.000450  | YES        |
| RMS Force     | 0.000004 | 0.000300  | YES        |

INT\_SYN

-----  
 Cartesian coordinates (Angstroms):  
 -----

37

|   |        |        |        |
|---|--------|--------|--------|
| H | -2.034 | -2.843 | -0.420 |
| H | -3.401 | -1.759 | -0.756 |
| C | -2.309 | -1.821 | -0.698 |
| H | -2.235 | -2.234 | 1.928  |
| H | -1.892 | -1.612 | -1.689 |
| H | 4.457  | -1.276 | -0.990 |
| H | 4.324  | -0.576 | 1.388  |
| C | -2.340 | -1.165 | 1.715  |
| H | -3.407 | -0.916 | 1.735  |
| C | -1.746 | -0.858 | 0.349  |
| O | -0.321 | -1.073 | 0.392  |
| C | 2.091  | 1.321  | 1.370  |
| C | 3.644  | -1.703 | -0.387 |
| H | -1.832 | -0.606 | 2.504  |

|   |        |        |        |
|---|--------|--------|--------|
| C | 3.409  | -0.824 | 0.840  |
| H | -3.024 | 0.392  | -1.897 |
| B | 0.281  | -0.124 | -0.416 |
| H | -3.980 | 0.747  | -0.440 |
| C | 2.713  | 0.434  | 0.297  |
| C | -3.044 | 0.965  | -0.967 |
| C | -1.847 | 0.640  | -0.086 |
| H | 2.730  | -1.333 | 1.543  |
| O | -0.637 | 0.817  | -0.849 |
| C | 2.310  | -1.598 | -1.146 |
| H | 2.417  | -1.804 | -2.217 |
| C | 1.782  | -0.164 | -0.856 |
| H | -3.035 | 2.030  | -1.219 |
| H | -2.705 | 1.568  | 1.691  |
| H | 1.614  | -2.347 | -0.745 |
| C | -1.787 | 1.608  | 1.096  |
| H | -0.929 | 1.385  | 1.737  |
| H | -1.665 | 2.624  | 0.709  |
| H | 3.916  | -2.739 | -0.152 |
| H | 3.492  | 1.012  | -0.229 |
| H | 1.603  | 2.191  | 0.891  |
| H | 1.282  | 0.756  | 1.871  |
| H | 1.889  | 0.472  | -1.745 |

|                                              | 1       | 2       | 3                           |
|----------------------------------------------|---------|---------|-----------------------------|
|                                              | A       | A       | A                           |
| Frequencies --                               | 27.7672 | 58.2730 | 82.3290                     |
| Red. masses --                               | 2.6544  | 3.4536  | 3.6358                      |
| Zero-point correction=                       |         |         | 0.328923 (Hartree/Particle) |
| Thermal correction to Energy=                |         |         | 0.344508                    |
| Thermal correction to Enthalpy=              |         |         | 0.345453                    |
| Thermal correction to Gibbs Free Energy=     |         |         | 0.287175                    |
| Sum of electronic and zero-point Energies=   |         |         | -645.361118                 |
| Sum of electronic and thermal Energies=      |         |         | -645.345532                 |
| Sum of electronic and thermal Enthalpies=    |         |         | -645.344588                 |
| Sum of electronic and thermal Free Energies= |         |         | -645.402866                 |

| Item          | Value    | Threshold | Converged? |
|---------------|----------|-----------|------------|
| Maximum Force | 0.000014 | 0.000450  | YES        |
| RMS Force     | 0.000004 | 0.000300  | YES        |

TS2\_SYN

-----  
Cartesian coordinates (Angstroms):  
-----

37

|   |        |        |        |
|---|--------|--------|--------|
| H | -1.927 | -2.791 | -0.438 |
| H | -3.288 | -1.716 | -0.825 |
| C | -2.199 | -1.766 | -0.710 |
| H | -2.267 | -2.221 | 1.913  |
| H | -1.731 | -1.532 | -1.672 |
| H | 4.440  | -1.296 | -1.073 |
| H | 4.393  | -0.464 | 1.277  |
| C | -2.370 | -1.151 | 1.706  |
| H | -3.440 | -0.912 | 1.668  |
| C | -1.695 | -0.819 | 0.382  |
| O | -0.282 | -1.020 | 0.501  |
| C | 1.799  | 1.136  | 1.216  |
| C | 3.673  | -1.715 | -0.405 |
| H | -1.915 | -0.598 | 2.532  |
| C | 3.463  | -0.776 | 0.784  |
| H | -2.938 | 0.458  | -1.871 |
| B | 0.380  | -0.017 | -0.245 |
| H | -3.925 | 0.778  | -0.425 |
| C | 2.678  | 0.416  | 0.207  |
| C | -2.981 | 1.014  | -0.931 |
| C | -1.793 | 0.684  | -0.038 |
| H | 2.844  | -1.281 | 1.541  |
| O | -0.583 | 0.865  | -0.782 |
| C | 2.301  | -1.690 | -1.103 |
| H | 2.356  | -2.002 | -2.153 |
| C | 1.803  | -0.236 | -0.916 |
| H | -2.978 | 2.084  | -1.165 |
| H | -2.708 | 1.590  | 1.727  |
| H | 1.625  | -2.391 | -0.595 |
| C | -1.769 | 1.632  | 1.164  |
| H | -0.936 | 1.393  | 1.832  |
| H | -1.628 | 2.655  | 0.798  |
| H | 3.995  | -2.724 | -0.122 |

|   |       |       |        |
|---|-------|-------|--------|
| H | 3.411 | 1.104 | -0.248 |
| H | 1.256 | 2.019 | 0.881  |
| H | 1.292 | 0.522 | 1.959  |
| H | 1.879 | 0.332 | -1.855 |

|                                              |           |             |                    |
|----------------------------------------------|-----------|-------------|--------------------|
|                                              | 1         | 2           | 3                  |
|                                              | A         | A           | A                  |
| Frequencies --                               | -550.9388 | 49.2730     | 57.0464            |
| Red. masses --                               | 2.9417    | 2.8077      | 3.5391             |
| Zero-point correction=                       |           | 0.326555    | (Hartree/Particle) |
| Thermal correction to Energy=                |           | 0.341917    |                    |
| Thermal correction to Enthalpy=              |           | 0.342861    |                    |
| Thermal correction to Gibbs Free Energy=     |           | 0.285668    |                    |
| Sum of electronic and zero-point Energies=   |           | -645.354602 |                    |
| Sum of electronic and thermal Energies=      |           | -645.339240 |                    |
| Sum of electronic and thermal Enthalpies=    |           | -645.338296 |                    |
| Sum of electronic and thermal Free Energies= |           | -645.395489 |                    |

| Item          | Value    | Threshold | Converged? |
|---------------|----------|-----------|------------|
| Maximum Force | 0.000031 | 0.000450  | YES        |
| RMS Force     | 0.000004 | 0.000300  | YES        |

PDT\_SYN

-----  
 Cartesian coordinates (Angstroms):  
 -----

37

|   |        |        |        |
|---|--------|--------|--------|
| H | -1.242 | -2.674 | -0.381 |
| H | -2.681 | -1.821 | -0.981 |
| C | -1.634 | -1.695 | -0.681 |
| H | -2.079 | -2.263 | 1.889  |
| H | -1.055 | -1.345 | -1.542 |
| H | 4.212  | -1.690 | -1.028 |
| H | 4.221  | -0.775 | 1.283  |
| C | -2.324 | -1.217 | 1.670  |
| H | -3.395 | -1.159 | 1.440  |
| C | -1.480 | -0.724 | 0.498  |
| O | -0.123 | -0.666 | 0.885  |

|   |        |        |        |
|---|--------|--------|--------|
| C | 1.751  | 1.215  | 0.868  |
| C | 3.343  | -1.921 | -0.396 |
| H | -2.126 | -0.628 | 2.570  |
| C | 3.270  | -0.904 | 0.750  |
| H | -2.733 | 0.394  | -1.842 |
| B | 0.557  | 0.375  | 0.060  |
| H | -3.866 | 0.503  | -0.473 |
| C | 2.777  | 0.379  | 0.066  |
| C | -2.939 | 0.907  | -0.898 |
| C | -1.771 | 0.750  | 0.073  |
| H | 2.518  | -1.238 | 1.479  |
| O | -0.570 | 1.127  | -0.567 |
| C | 2.039  | -1.661 | -1.180 |
| H | 2.133  | -1.960 | -2.233 |
| C | 1.753  | -0.156 | -0.982 |
| H | -3.100 | 1.969  | -1.115 |
| H | -2.964 | 1.467  | 1.778  |
| H | 1.229  | -2.262 | -0.746 |
| C | -1.998 | 1.655  | 1.293  |
| H | -1.198 | 1.509  | 2.026  |
| H | -1.977 | 2.699  | 0.962  |
| H | 3.449  | -2.958 | -0.054 |
| H | 3.643  | 0.930  | -0.338 |
| H | 1.857  | 1.157  | 1.964  |
| H | 1.786  | 2.275  | 0.578  |
| H | 1.784  | 0.407  | -1.925 |

|                                              | 1       | 2                           | 3       |
|----------------------------------------------|---------|-----------------------------|---------|
|                                              | A       | A                           | A       |
| Frequencies --                               | 63.8222 | 71.6321                     | 89.0193 |
| Red. masses --                               | 3.0676  | 3.1689                      | 3.4432  |
| Zero-point correction=                       |         | 0.328434 (Hartree/Particle) |         |
| Thermal correction to Energy=                |         | 0.343345                    |         |
| Thermal correction to Enthalpy=              |         | 0.344289                    |         |
| Thermal correction to Gibbs Free Energy=     |         | 0.288438                    |         |
| Sum of electronic and zero-point Energies=   |         | -645.397903                 |         |
| Sum of electronic and thermal Energies=      |         | -645.382991                 |         |
| Sum of electronic and thermal Enthalpies=    |         | -645.382047                 |         |
| Sum of electronic and thermal Free Energies= |         | -645.437898                 |         |

| Item | Value | Threshold | Converged? |
|------|-------|-----------|------------|
|------|-------|-----------|------------|

|               |          |          |     |
|---------------|----------|----------|-----|
| Maximum Force | 0.000019 | 0.000450 | YES |
| RMS Force     | 0.000004 | 0.000300 | YES |

TS1\_ANTI

-----  
Cartesian coordinates (Angstroms):  
-----

37

|   |        |        |        |
|---|--------|--------|--------|
| H | -2.147 | -2.703 | -0.607 |
| H | -3.402 | -1.446 | -0.612 |
| C | -2.331 | -1.632 | -0.744 |
| H | -1.932 | -2.309 | 1.799  |
| H | -2.051 | -1.365 | -1.769 |
| H | 4.341  | -2.421 | -0.135 |
| H | 4.680  | 0.028  | -0.627 |
| C | -1.917 | -1.220 | 1.686  |
| H | -2.924 | -0.840 | 1.895  |
| C | -1.491 | -0.855 | 0.271  |
| O | -0.120 | -1.227 | 0.076  |
| C | 3.004  | 2.056  | -0.002 |
| C | 3.509  | -1.707 | -0.071 |
| H | -1.226 | -0.807 | 2.425  |
| C | 3.985  | -0.281 | 0.170  |
| H | -3.001 | 0.768  | -1.556 |
| B | 0.457  | -0.301 | -0.820 |
| H | -3.593 | 1.067  | 0.096  |
| C | 2.805  | 0.677  | 0.191  |
| C | -2.760 | 1.234  | -0.597 |
| C | -1.464 | 0.678  | -0.024 |
| H | 4.533  | -0.203 | 1.119  |
| O | -0.427 | 0.779  | -1.007 |
| C | 2.653  | -1.678 | -1.351 |
| H | 3.324  | -1.719 | -2.221 |
| C | 1.850  | -0.387 | -1.357 |
| H | -2.659 | 2.313  | -0.755 |
| H | -1.818 | 1.521  | 1.962  |



|   |        |        |        |
|---|--------|--------|--------|
| H | 2.027  | -2.581 | -1.399 |
| C | -1.038 | 1.501  | 1.194  |
| H | -0.120 | 1.099  | 1.635  |
| H | -0.838 | 2.528  | 0.871  |
| H | 2.881  | -2.013 | 0.778  |
| H | 2.133  | 0.334  | -2.123 |
| H | 3.698  | 2.376  | -0.784 |
| H | 2.175  | 2.741  | 0.179  |
| H | 2.099  | 0.421  | 0.987  |

|                                              |           |             |                    |
|----------------------------------------------|-----------|-------------|--------------------|
|                                              | 1         | 2           | 3                  |
|                                              | A         | A           | A                  |
| Frequencies --                               | -455.1548 | 49.2056     | 72.5751            |
| Red. masses --                               | 5.9965    | 2.8683      | 3.3171             |
| Zero-point correction=                       |           | 0.326380    | (Hartree/Particle) |
| Thermal correction to Energy=                |           | 0.341995    |                    |
| Thermal correction to Enthalpy=              |           | 0.342939    |                    |
| Thermal correction to Gibbs Free Energy=     |           | 0.285215    |                    |
| Sum of electronic and zero-point Energies=   |           | -645.347479 |                    |
| Sum of electronic and thermal Energies=      |           | -645.331865 |                    |
| Sum of electronic and thermal Enthalpies=    |           | -645.330920 |                    |
| Sum of electronic and thermal Free Energies= |           | -645.388645 |                    |

| Item          | Value    | Threshold | Converged? |
|---------------|----------|-----------|------------|
| Maximum Force | 0.000035 | 0.000450  | YES        |
| RMS Force     | 0.000006 | 0.000300  | YES        |

PDT\_ANTI

-----  
 Cartesian coordinates (Angstroms):  
 -----

37

|   |        |        |        |
|---|--------|--------|--------|
| C | 2.641  | 0.327  | 0.218  |
| H | 2.244  | -0.164 | 1.124  |
| H | -1.458 | -2.009 | 0.002  |
| H | -2.651 | -1.422 | -1.178 |
| C | -1.655 | -1.243 | -0.756 |

|   |        |        |        |
|---|--------|--------|--------|
| H | -2.586 | -0.576 | 1.657  |
| H | -0.906 | -1.345 | -1.548 |
| H | 4.587  | -1.823 | -1.278 |
| H | 4.588  | 0.477  | -0.717 |
| C | -2.625 | 0.280  | 0.973  |
| H | -3.624 | 0.307  | 0.520  |
| C | -1.544 | 0.139  | -0.094 |
| O | -0.269 | 0.267  | 0.502  |
| C | 1.918  | 1.683  | 0.088  |
| C | 3.901  | -1.603 | -0.451 |
| H | -2.481 | 1.191  | 1.560  |
| C | 4.091  | -0.130 | 0.052  |
| H | -2.243 | 0.190  | -2.889 |
| B | 0.674  | 0.737  | -0.551 |
| H | -3.536 | 0.974  | -1.947 |
| C | -2.506 | 1.080  | -2.311 |
| C | -1.533 | 1.285  | -1.154 |
| H | 4.705  | -0.087 | 0.961  |
| O | -0.204 | 1.241  | -1.637 |
| C | 2.402  | -1.746 | -0.914 |
| H | 2.328  | -2.297 | -1.860 |
| C | 1.921  | -0.298 | -0.971 |
| H | -2.471 | 1.944  | -2.984 |
| H | -2.827 | 2.779  | -0.189 |
| H | 1.833  | -2.314 | -0.164 |
| C | -1.785 | 2.654  | -0.507 |
| H | -1.130 | 2.790  | 0.360  |
| H | -1.553 | 3.435  | -1.240 |
| H | 4.136  | -2.318 | 0.347  |
| H | 1.795  | 2.268  | 1.011  |
| H | 2.400  | 2.315  | -0.674 |
| H | 2.383  | 0.166  | -1.867 |

|                                          | 1       | 2                           | 3       |
|------------------------------------------|---------|-----------------------------|---------|
|                                          | A       | A                           | A       |
| Frequencies --                           | 62.0776 | 68.8159                     | 98.9517 |
| Red. masses --                           | 3.7307  | 3.0379                      | 2.7455  |
| Zero-point correction=                   |         | 0.328127 (Hartree/Particle) |         |
| Thermal correction to Energy=            |         | 0.343269                    |         |
| Thermal correction to Enthalpy=          |         | 0.344213                    |         |
| Thermal correction to Gibbs Free Energy= |         | 0.287716                    |         |

*Liu, Deaton & Morken, Supporting Information*

|                                              |             |
|----------------------------------------------|-------------|
| Sum of electronic and zero-point Energies=   | -645.377943 |
| Sum of electronic and thermal Energies=      | -645.362802 |
| Sum of electronic and thermal Enthalpies=    | -645.361857 |
| Sum of electronic and thermal Free Energies= | -645.418355 |

| Item          | Value    | Threshold | Converged? |
|---------------|----------|-----------|------------|
| Maximum Force | 0.000037 | 0.000450  | YES        |
| RMS Force     | 0.000008 | 0.000300  | YES        |

Gaussian 09, Revision A.02,

M. J. Frisch, G. W. Trucks, H. B. Schlegel, G. E. Scuseria,  
M. A. Robb, J. R. Cheeseman, G. Scalmani, V. Barone, B. Mennucci,  
G. A. Petersson, H. Nakatsuji, M. Caricato, X. Li, H. P. Hratchian,  
A. F. Izmaylov, J. Bloino, G. Zheng, J. L. Sonnenberg, M. Hada,  
M. Ehara, K. Toyota, R. Fukuda, J. Hasegawa, M. Ishida, T. Nakajima,  
Y. Honda, O. Kitao, H. Nakai, T. Vreven, J. A. Montgomery, Jr.,  
J. E. Peralta, F. Ogliaro, M. Bearpark, J. J. Heyd, E. Brothers,  
K. N. Kudin, V. N. Staroverov, R. Kobayashi, J. Normand,  
K. Raghavachari, A. Rendell, J. C. Burant, S. S. Iyengar, J. Tomasi,  
M. Cossi, N. Rega, J. M. Millam, M. Klene, J. E. Knox, J. B. Cross,  
V. Bakken, C. Adamo, J. Jaramillo, R. Gomperts, R. E. Stratmann,  
O. Yazyev, A. J. Austin, R. Cammi, C. Pomelli, J. W. Ochterski,  
R. L. Martin, K. Morokuma, V. G. Zakrzewski, G. A. Voth,  
P. Salvador, J. J. Dannenberg, S. Dapprich, A. D. Daniels,  
O. Farkas, J. B. Foresman, J. V. Ortiz, J. Cioslowski,  
and D. J. Fox, Gaussian, Inc., Wallingford CT, 2009.

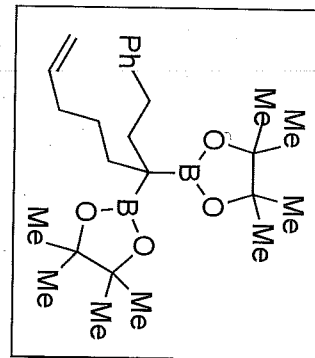

Compound 5

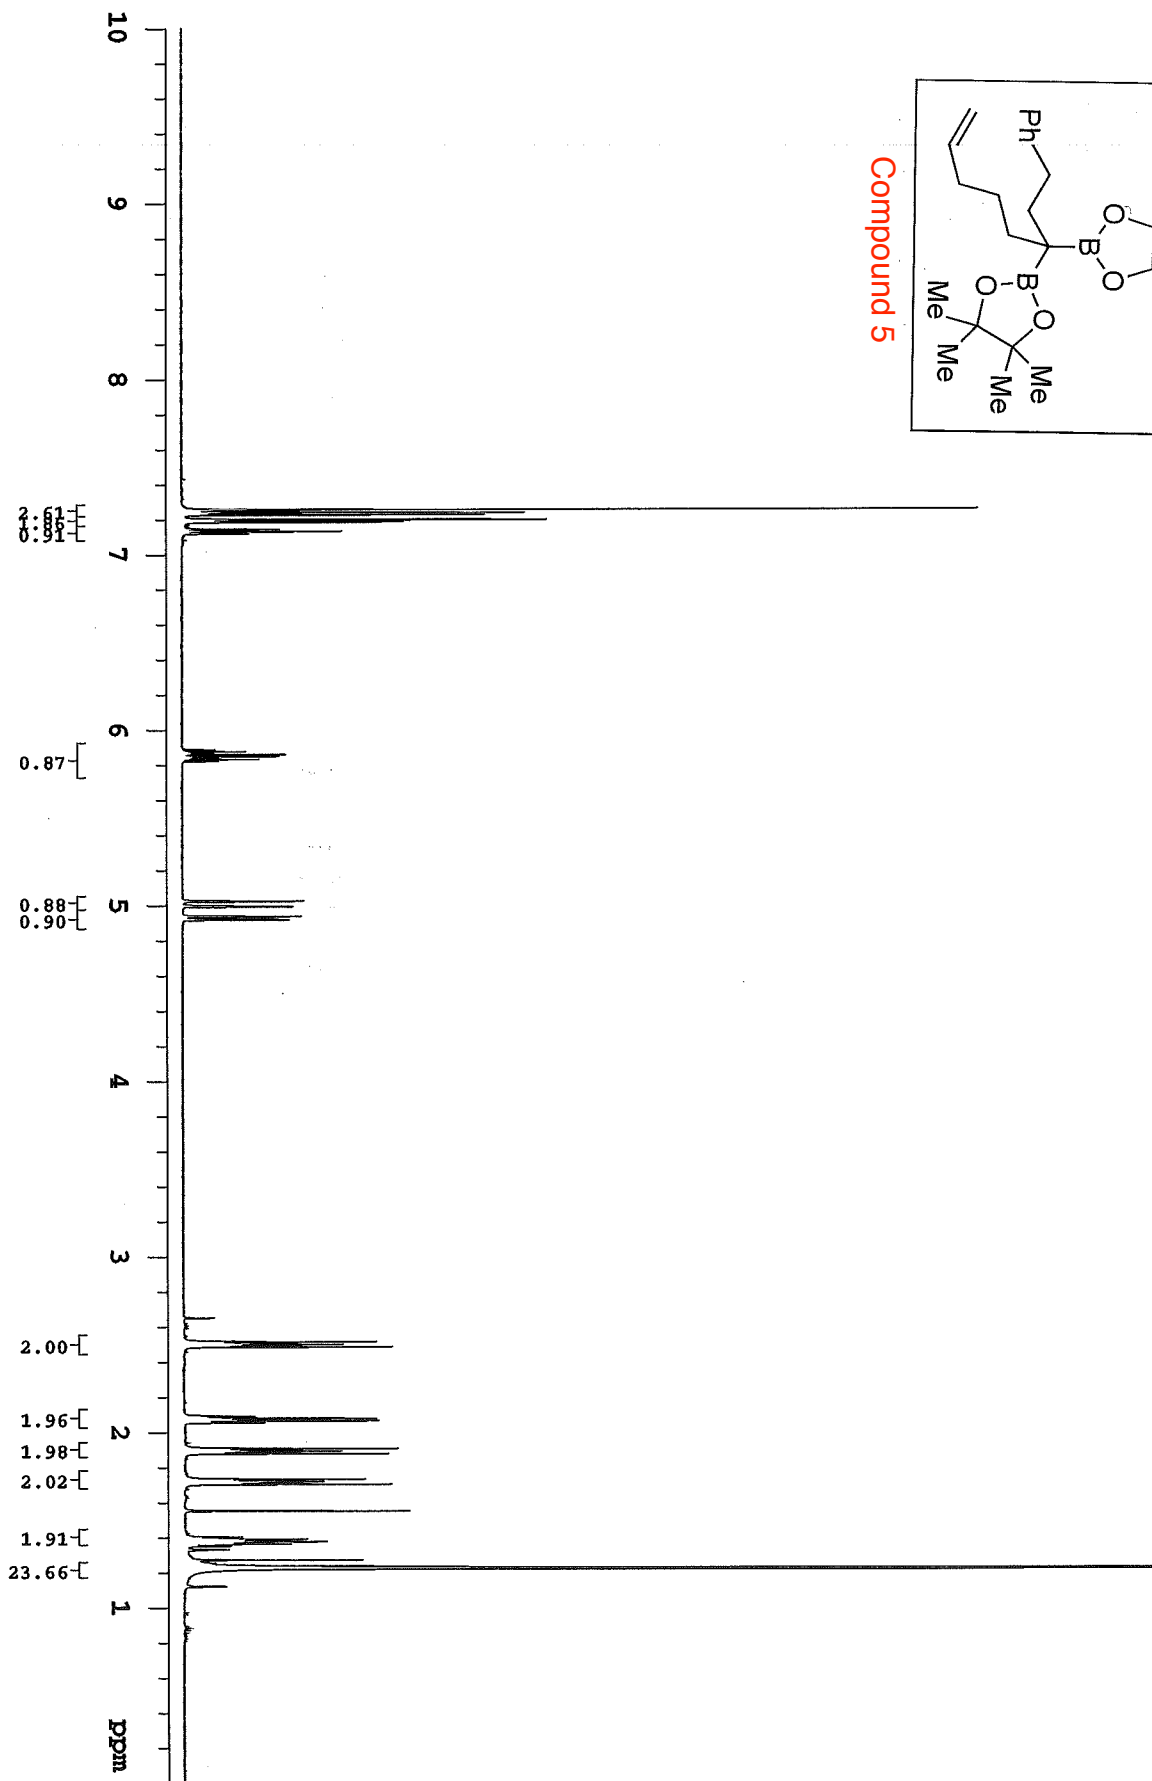

Compound 5

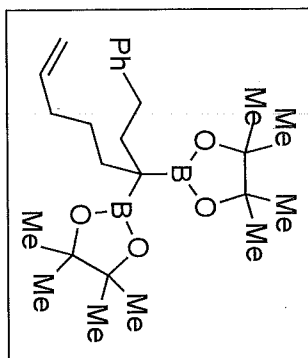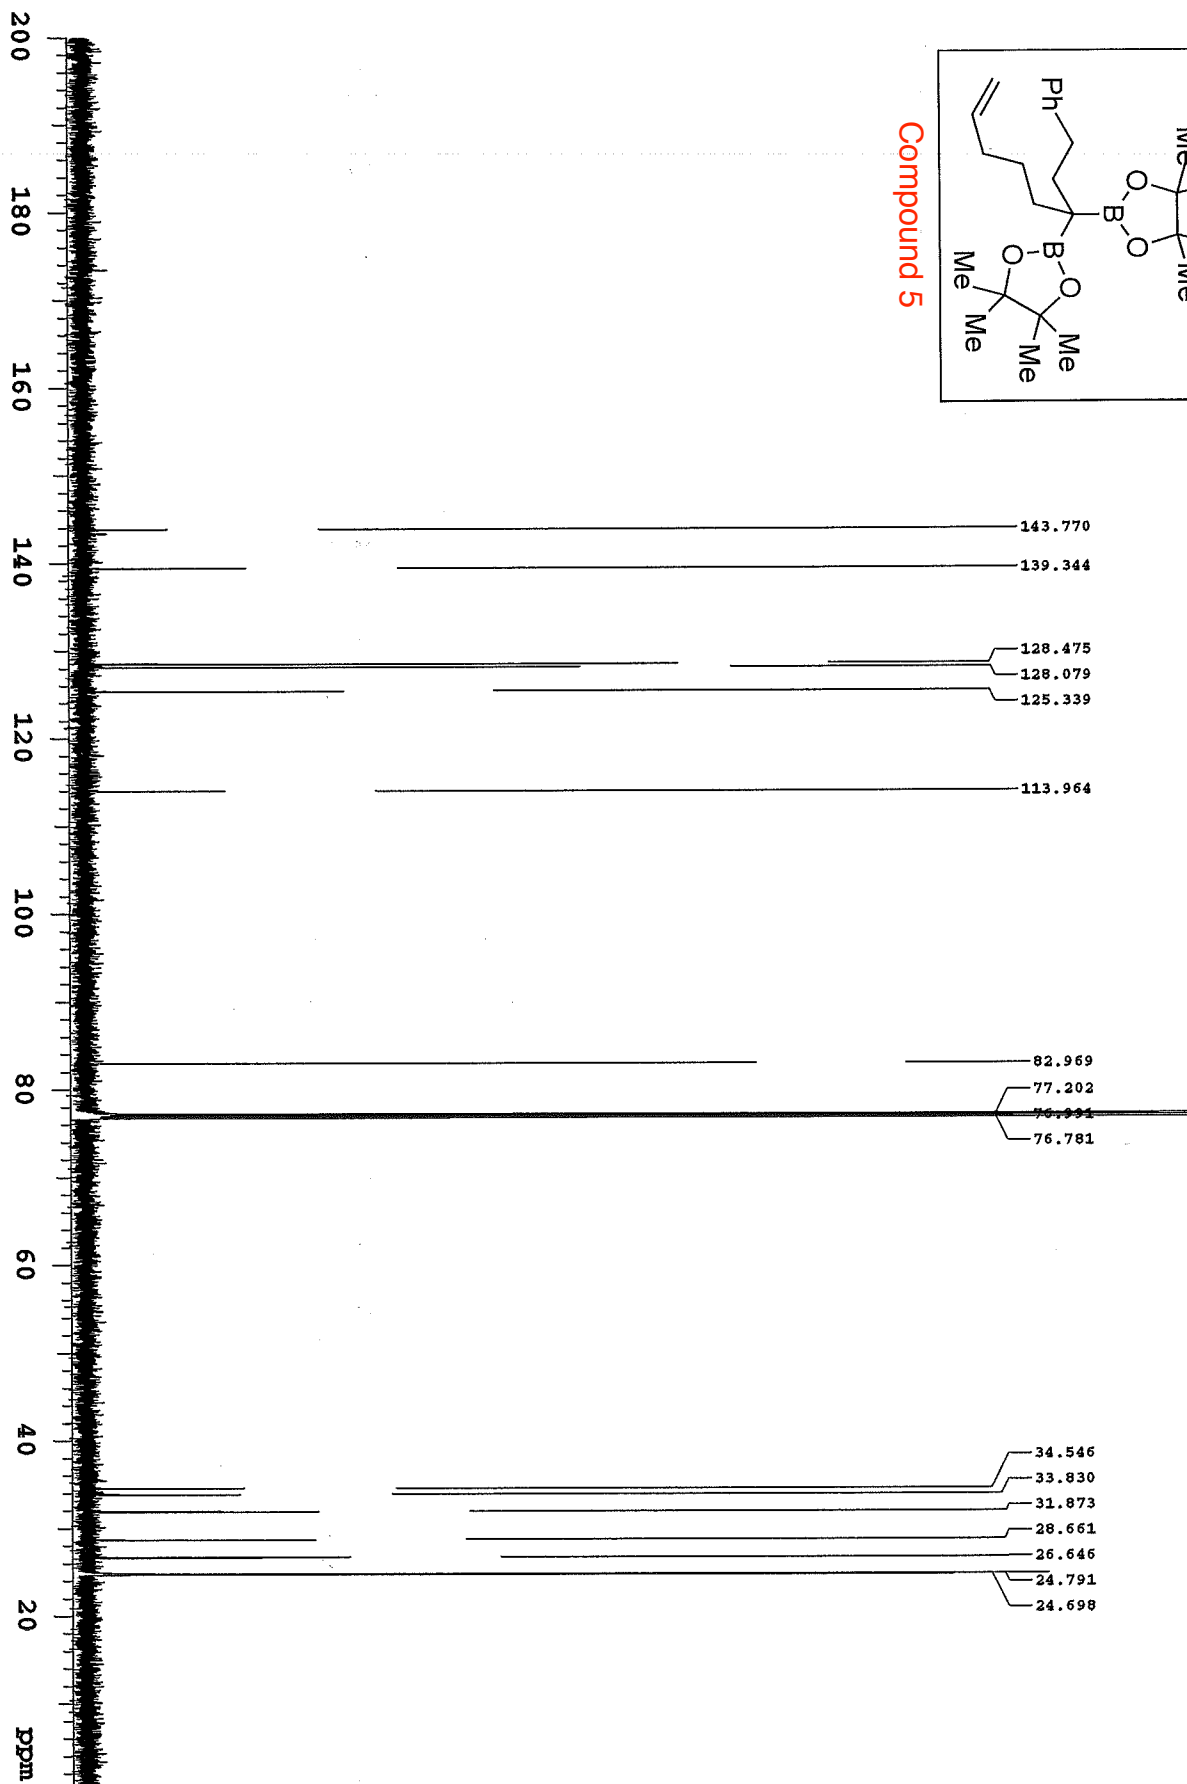

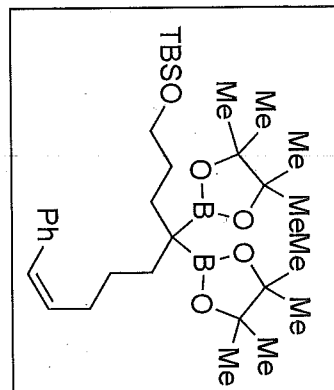

Compound S2

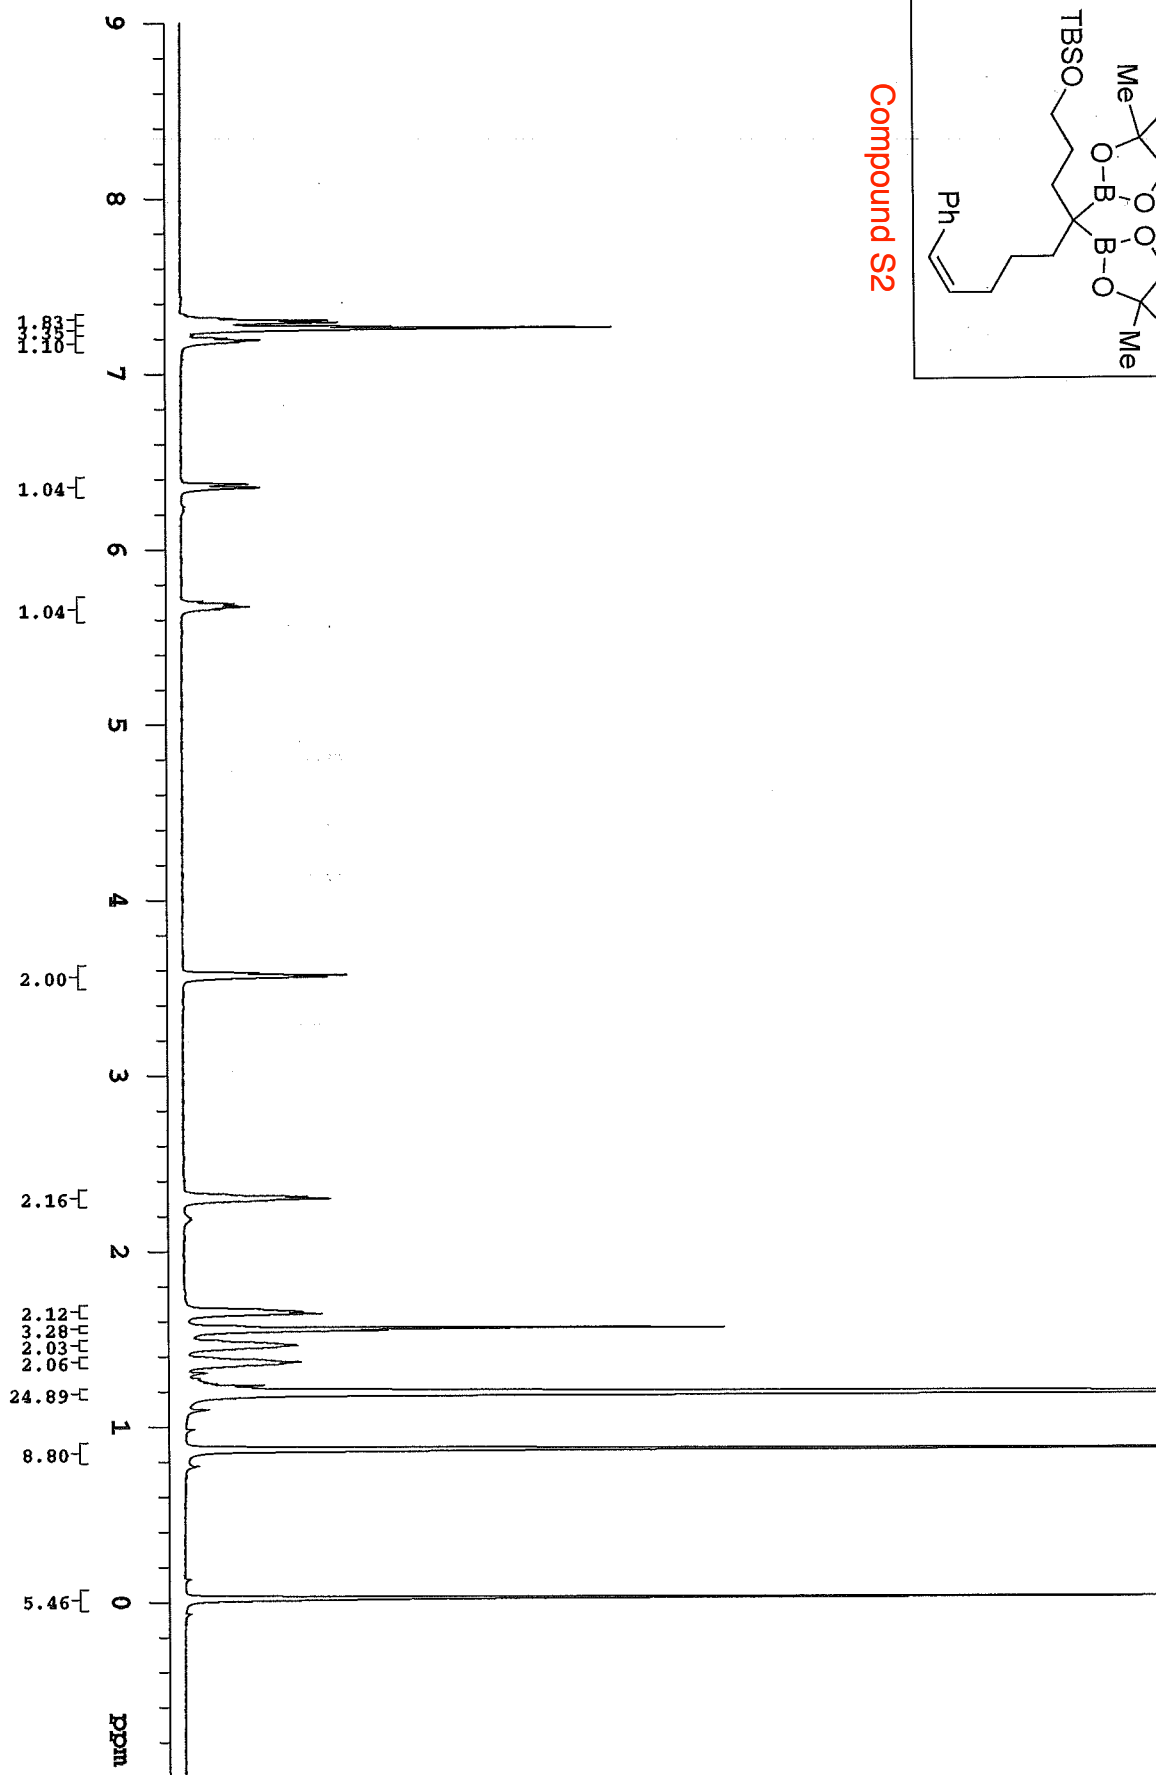

Compound S2

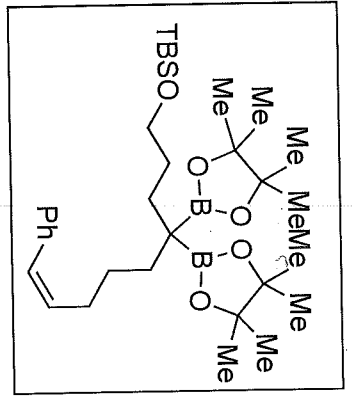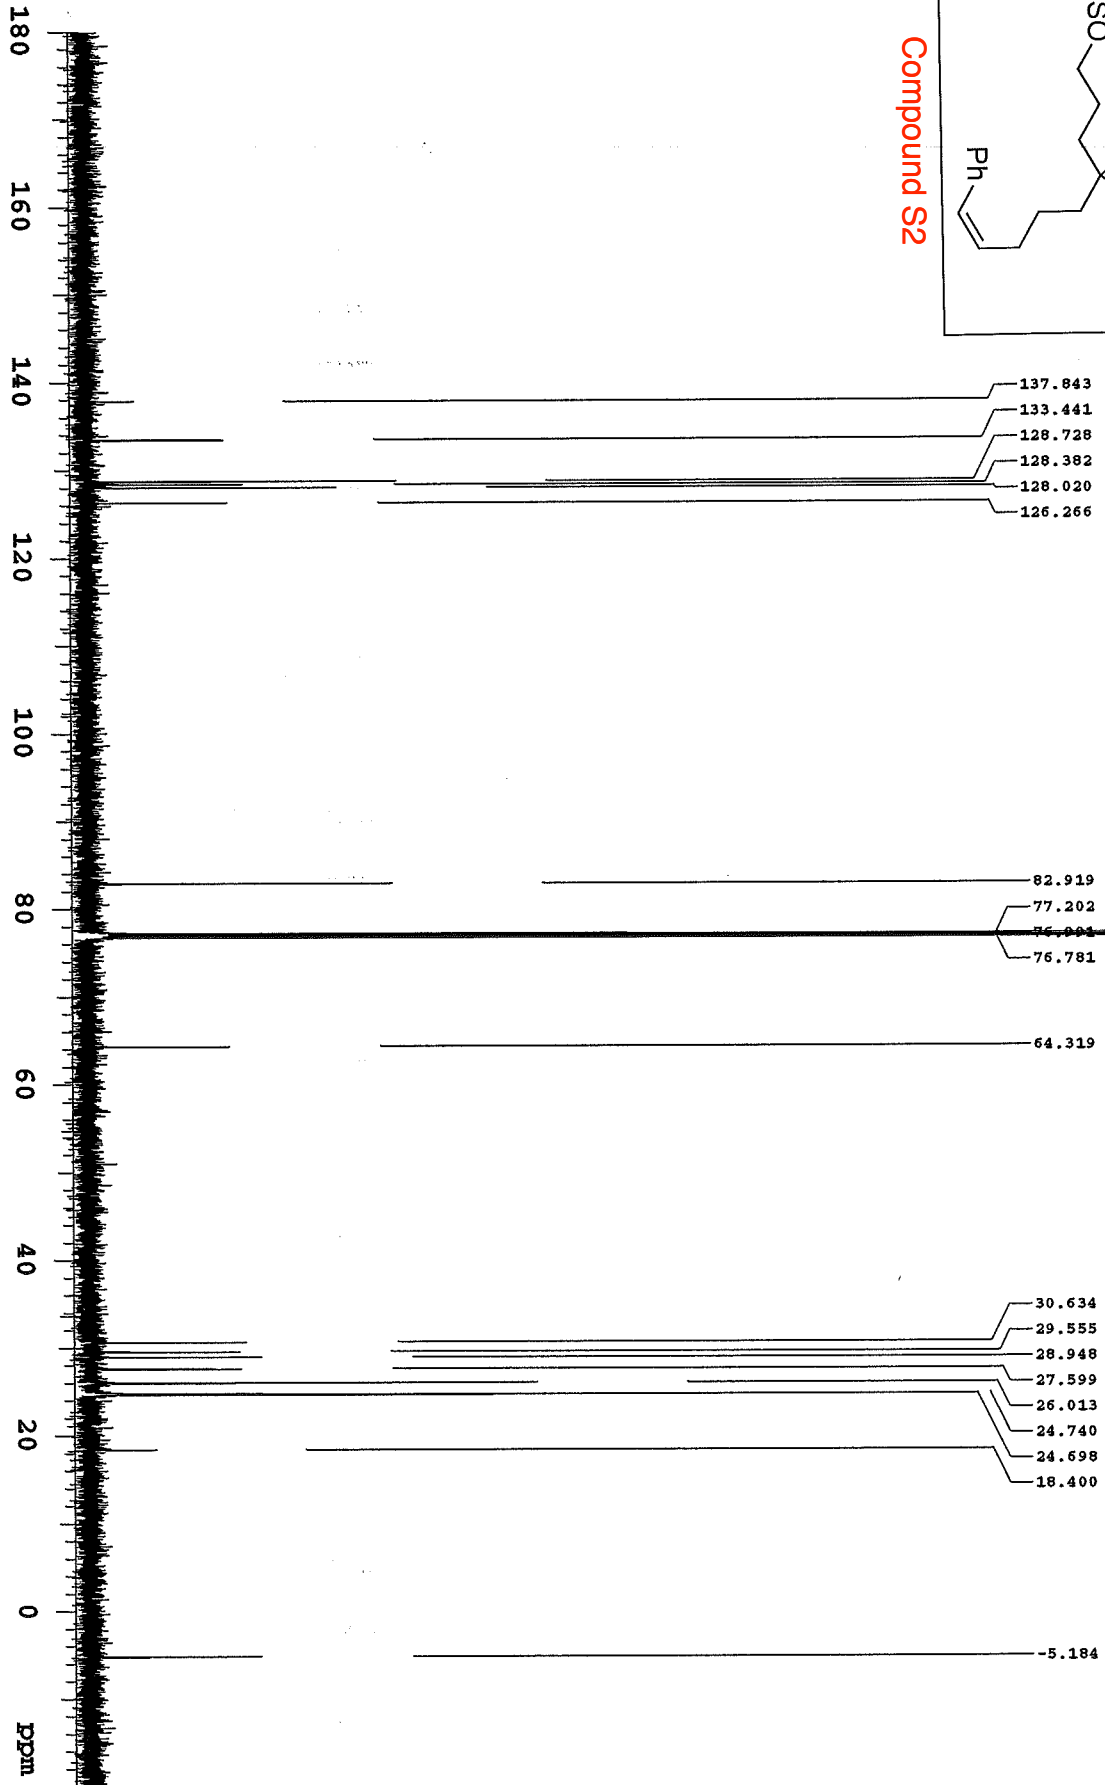

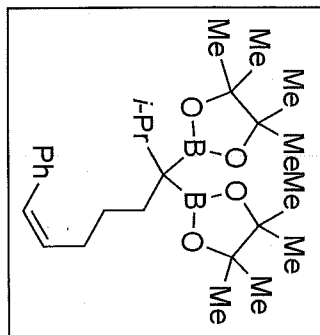

Compound S3

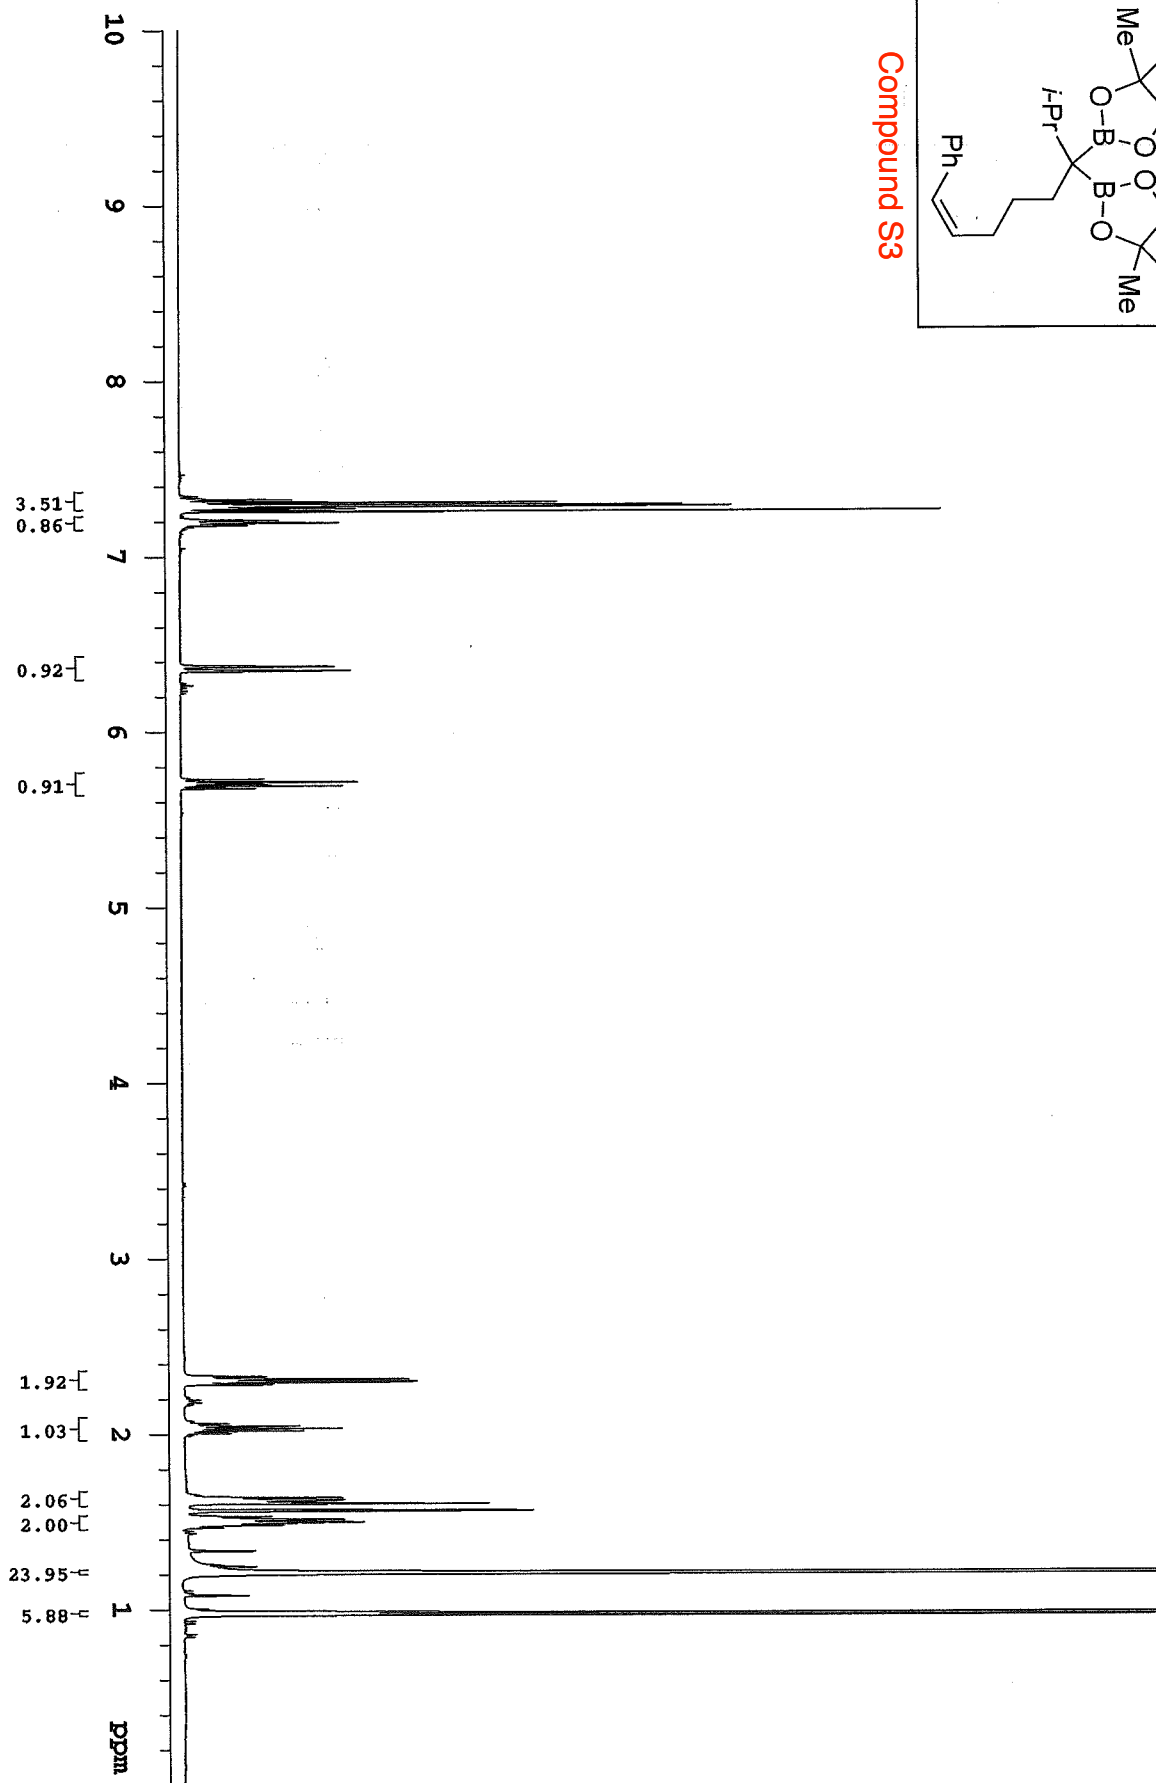



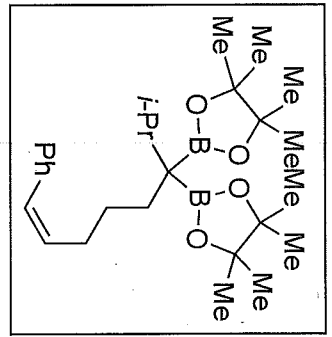

Compound S3

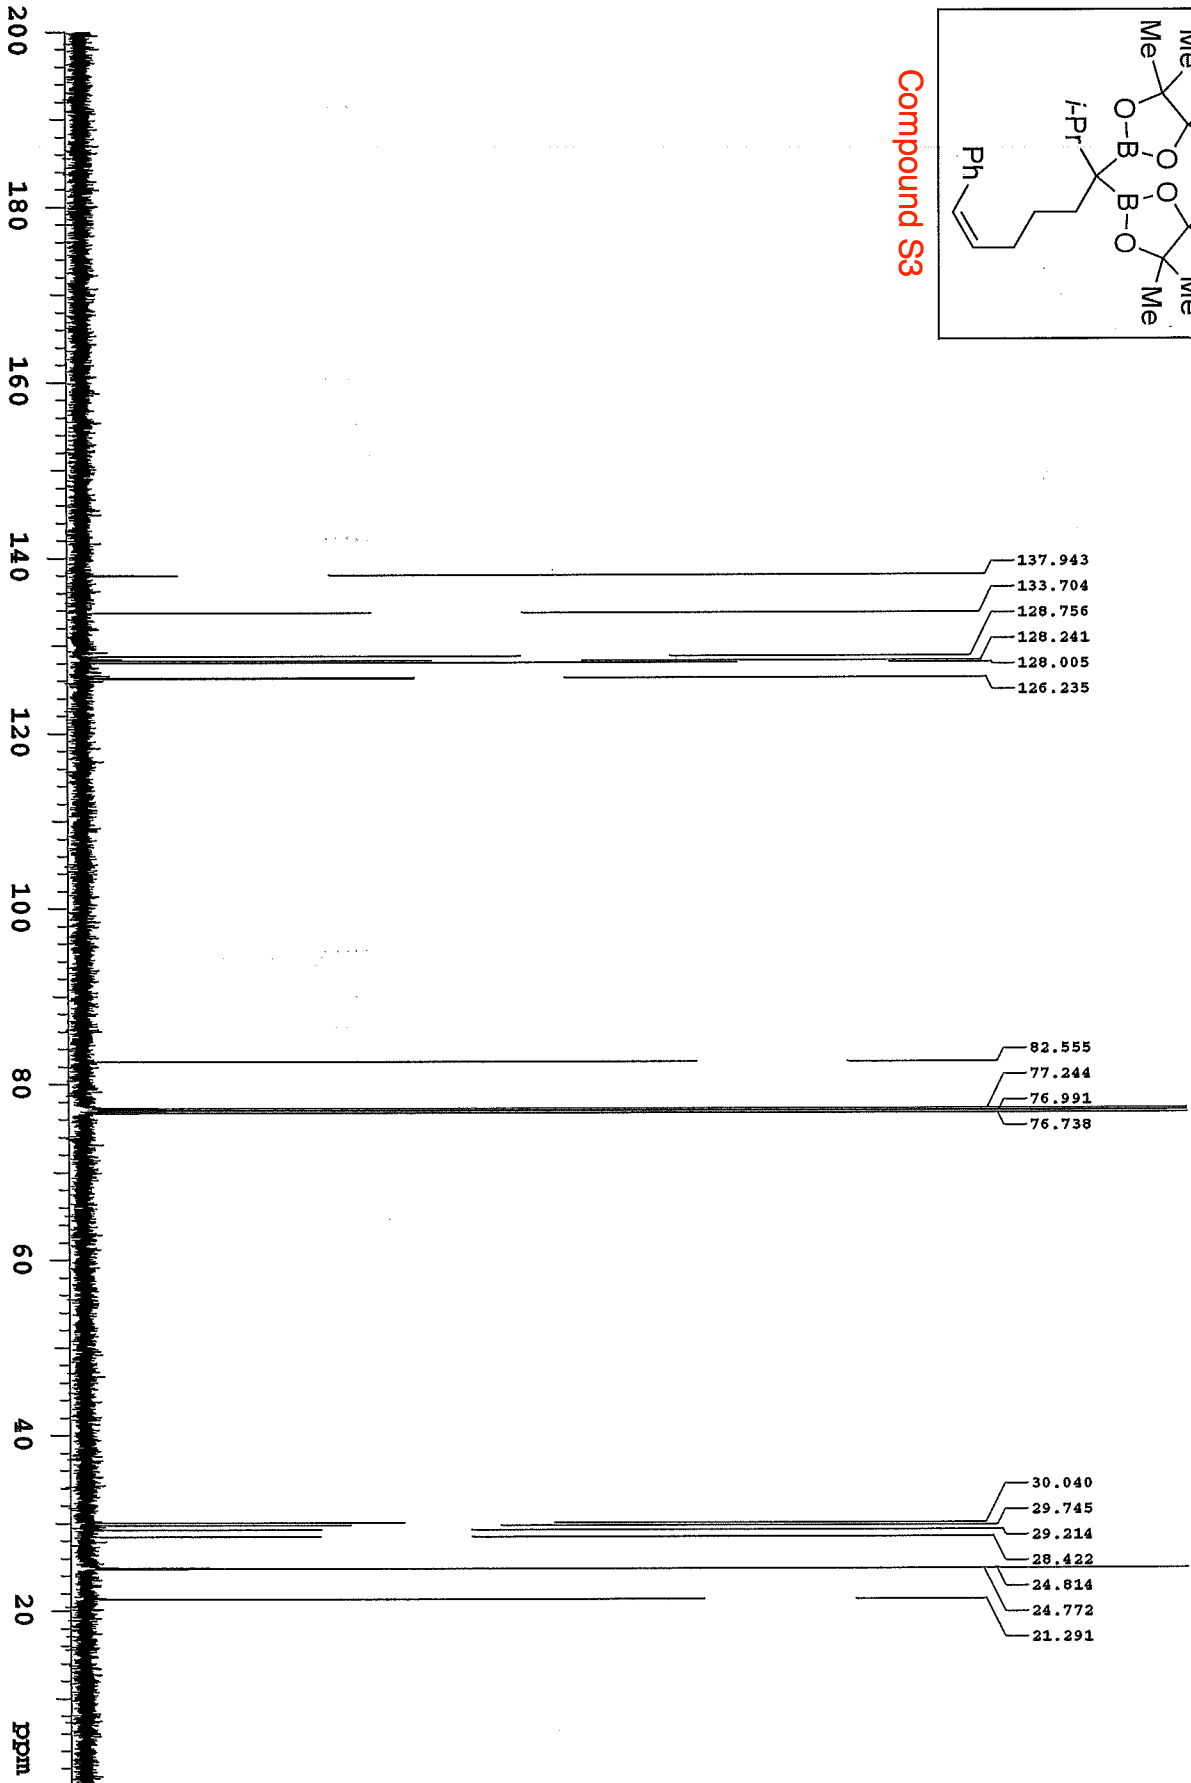

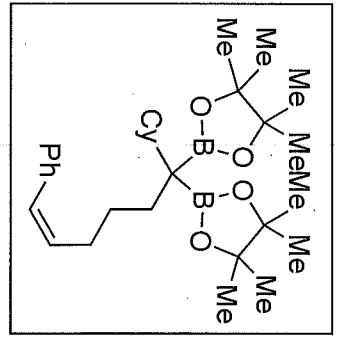

Compound S4

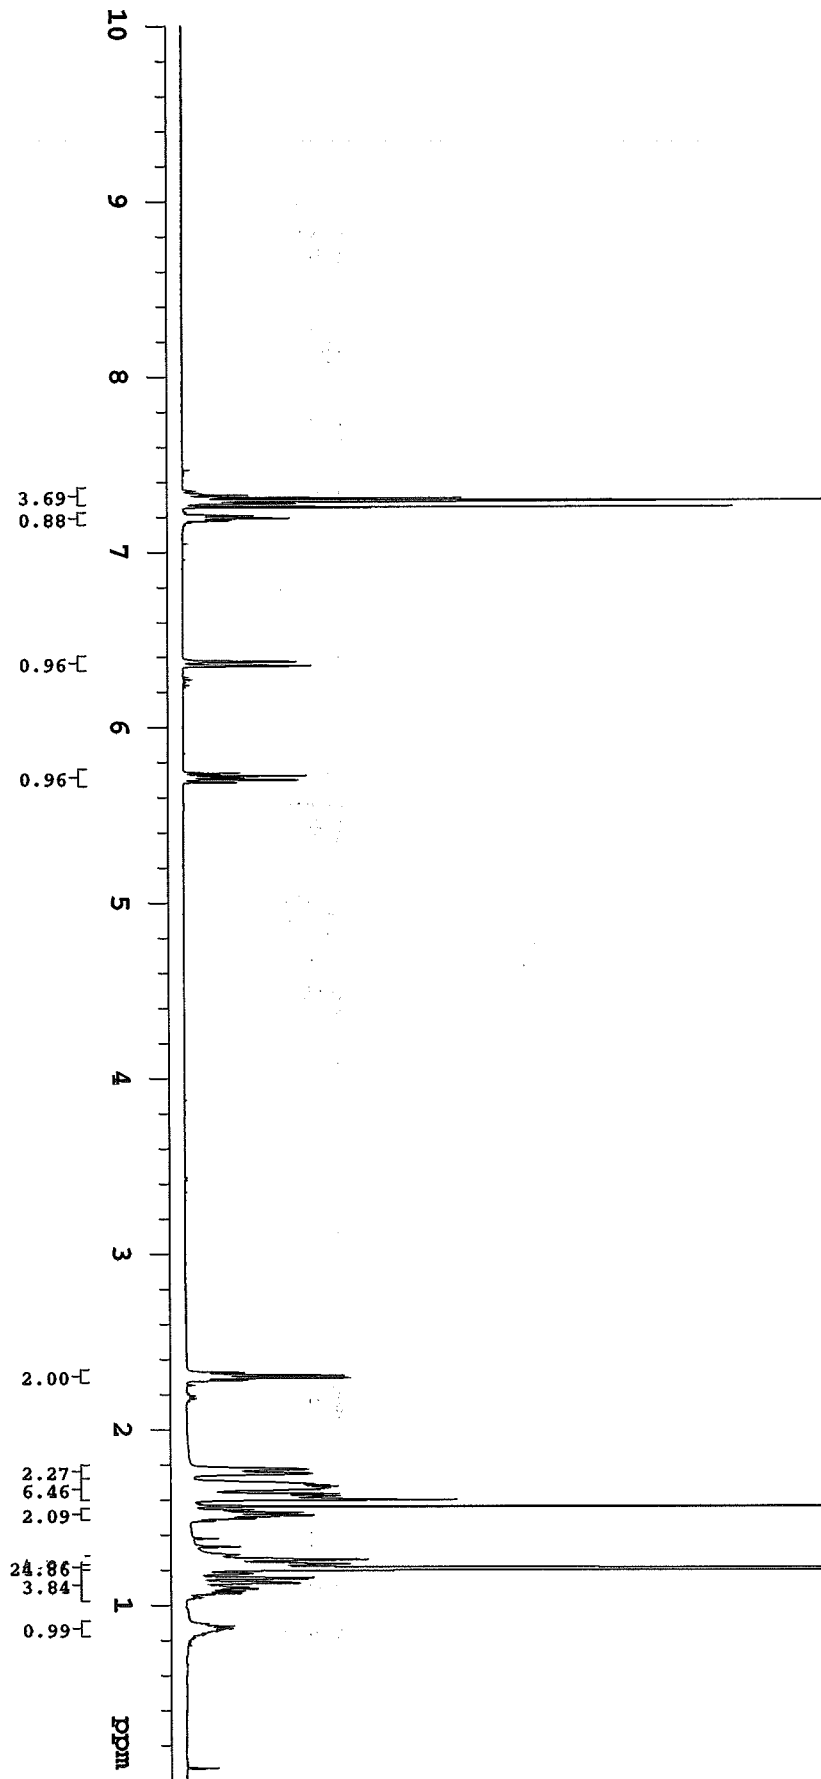

Compound S4

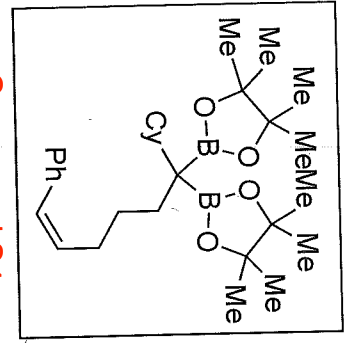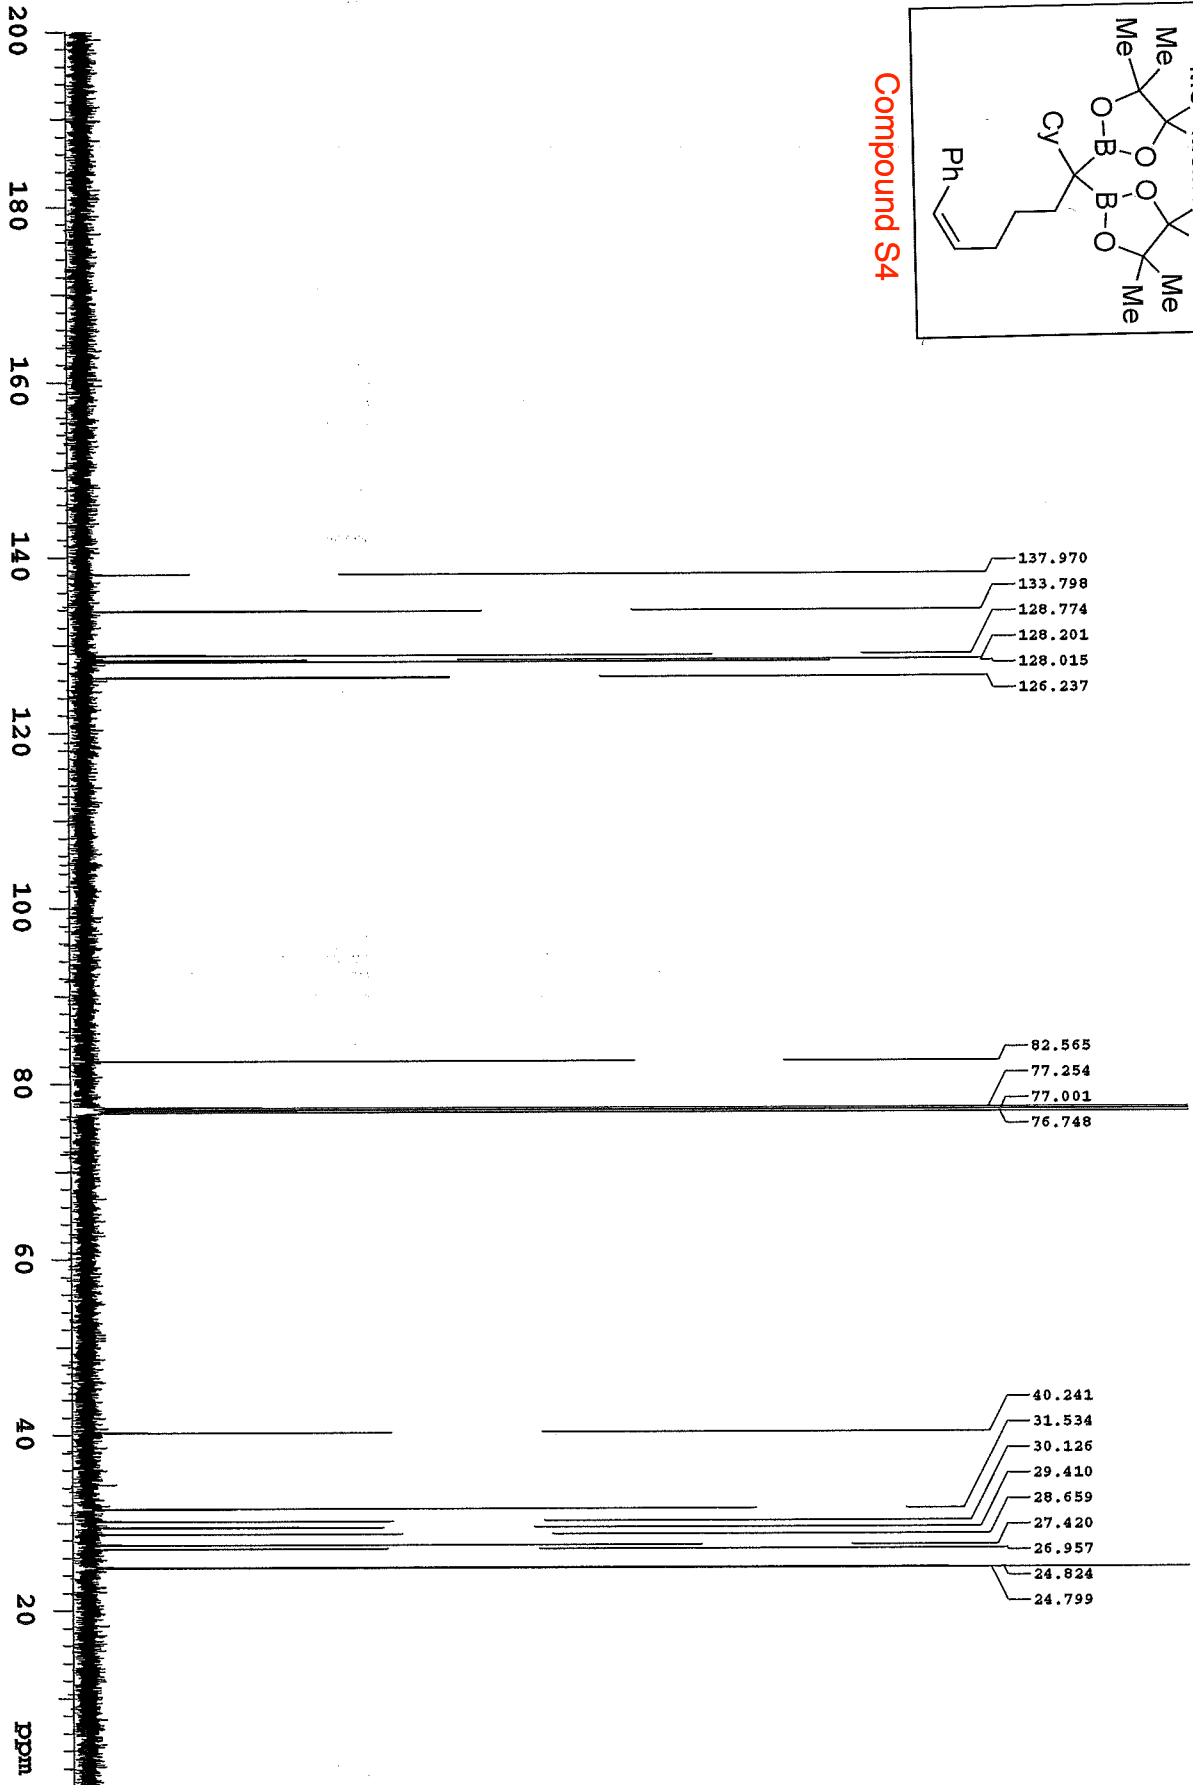

Compound S5

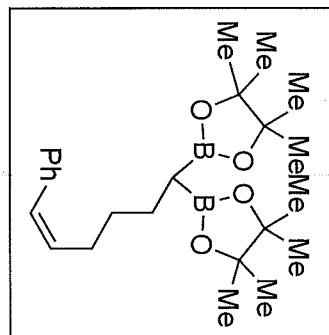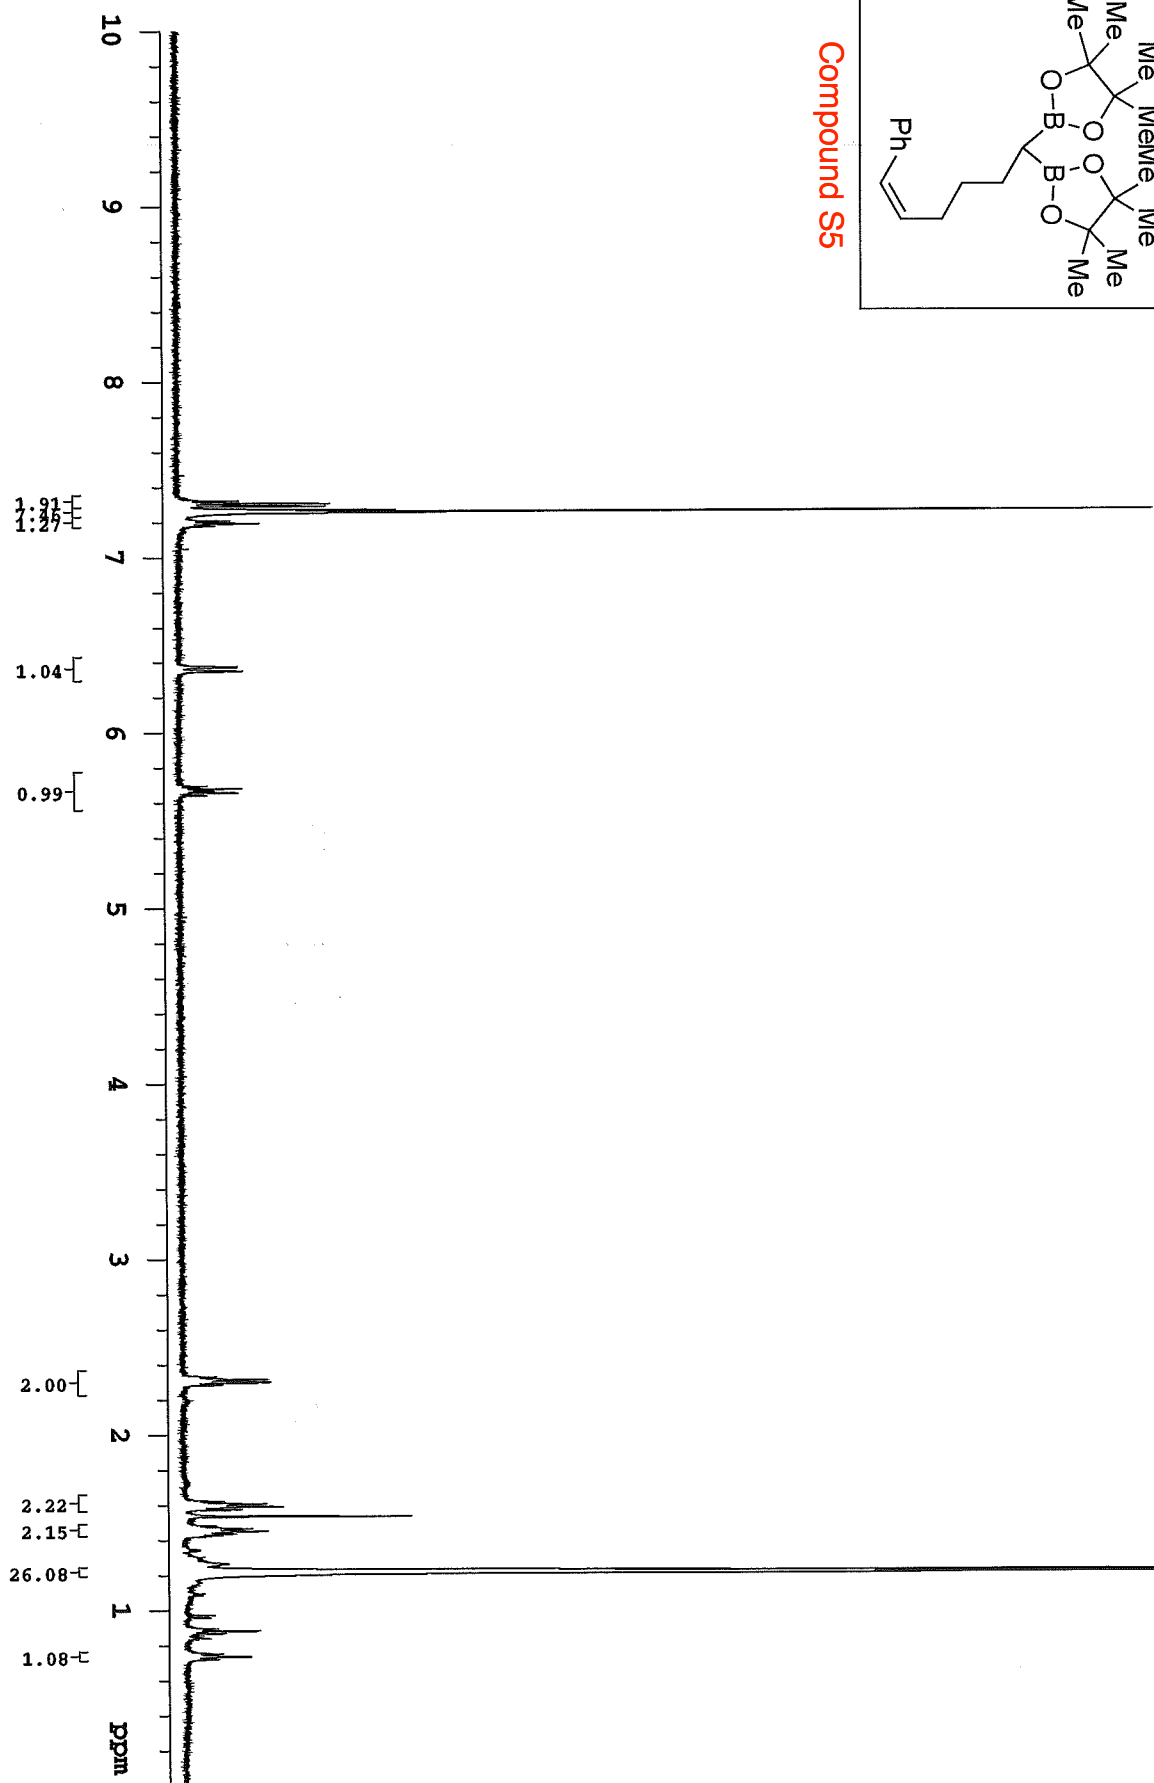

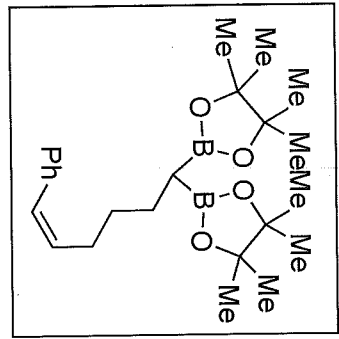

Compound S5

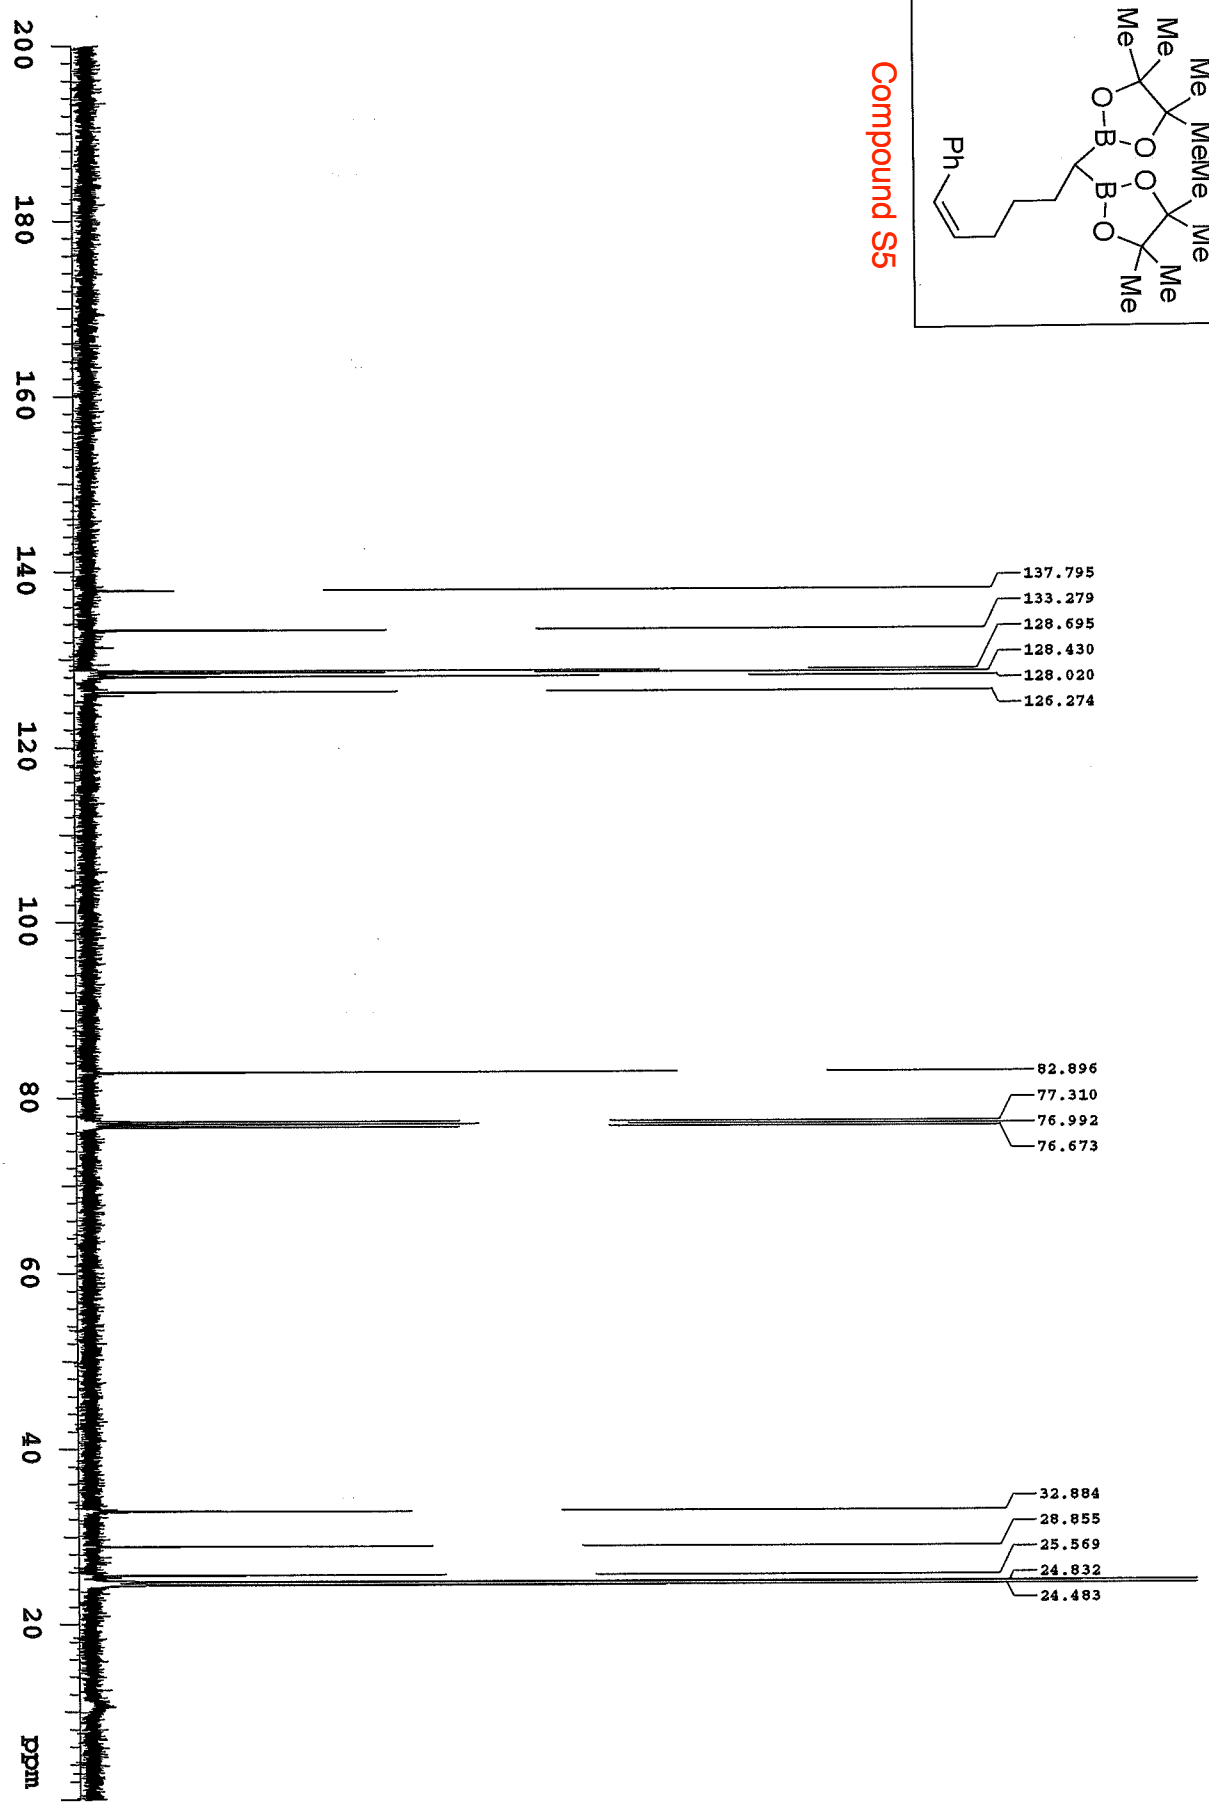

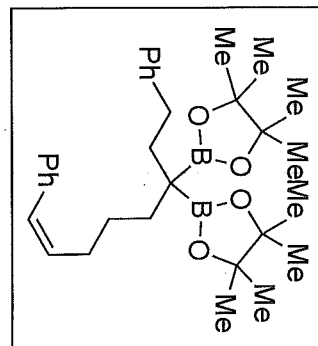

Compound 37

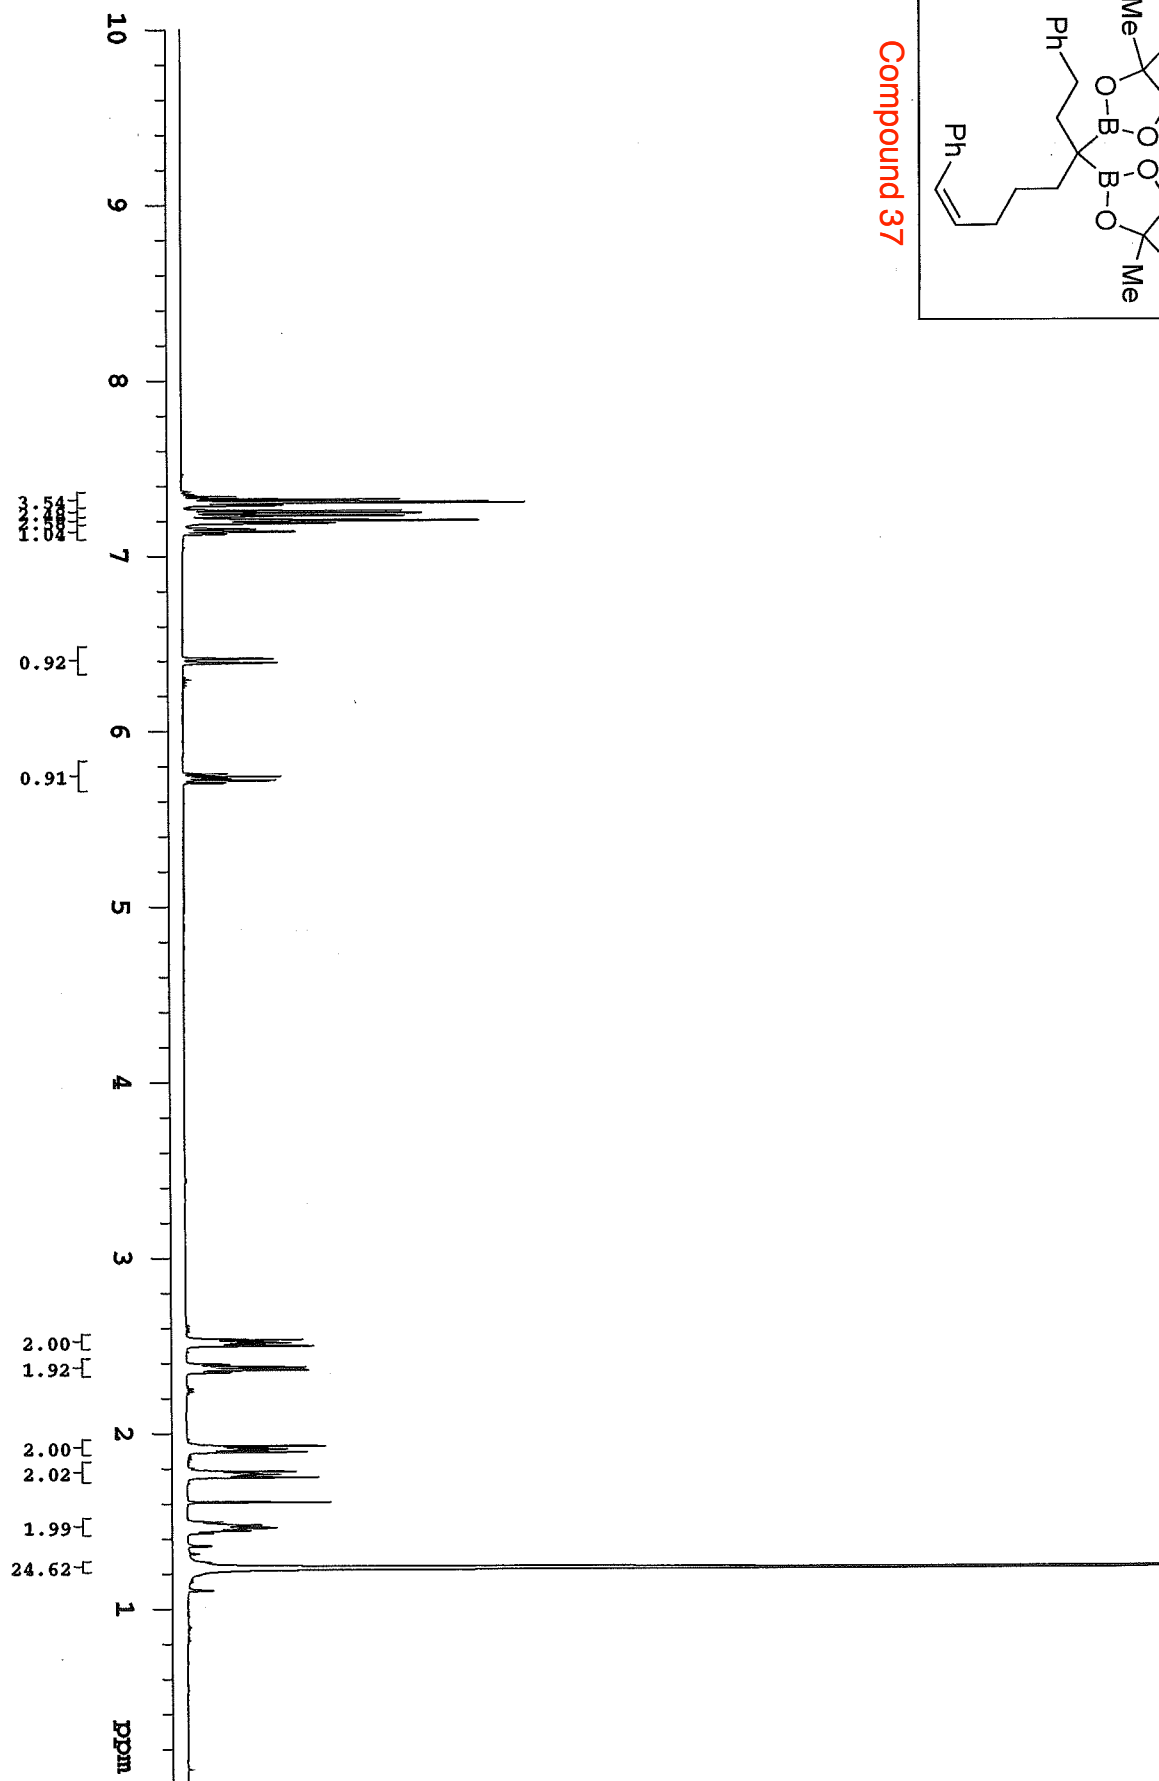

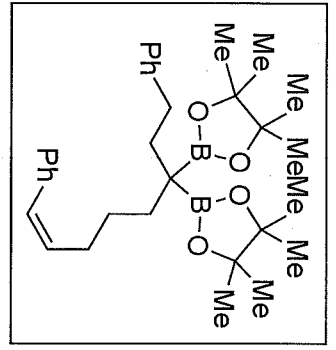

Compound 37

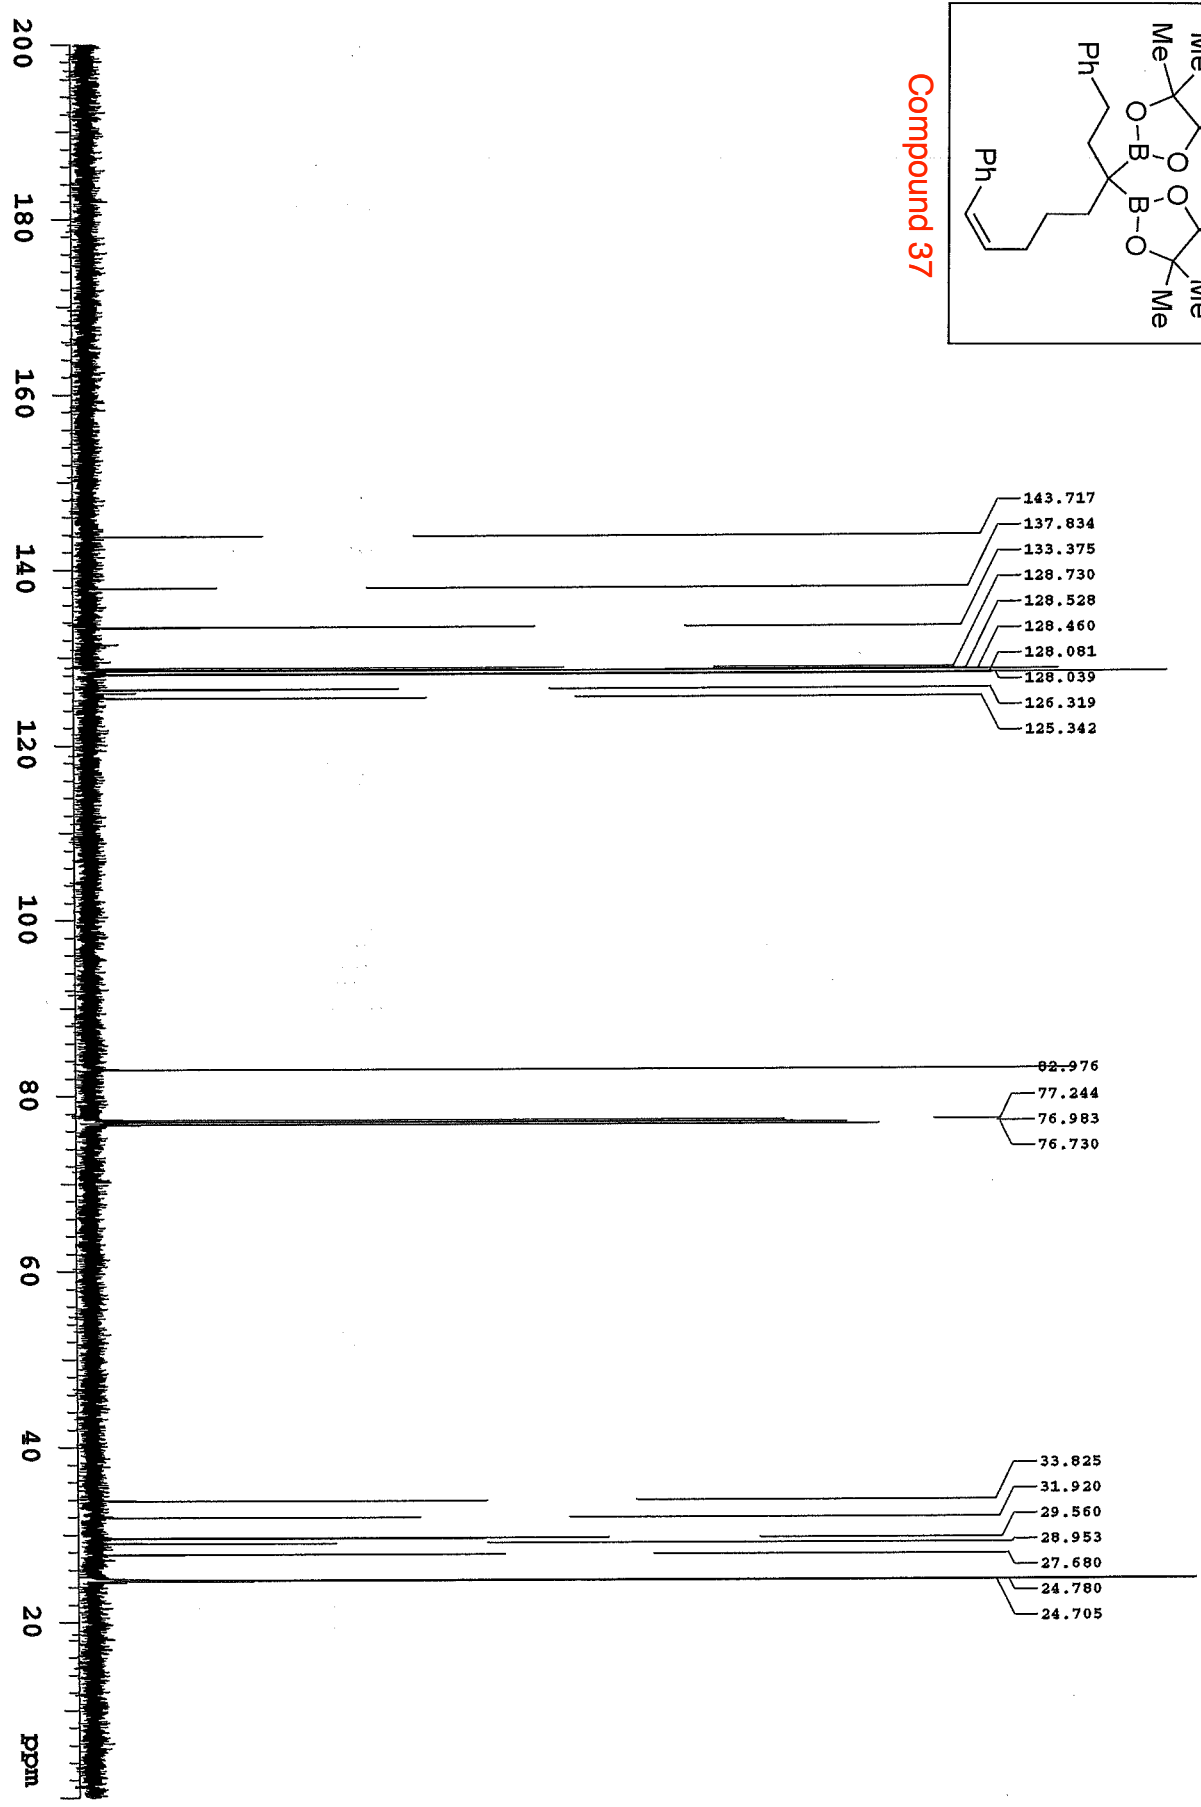

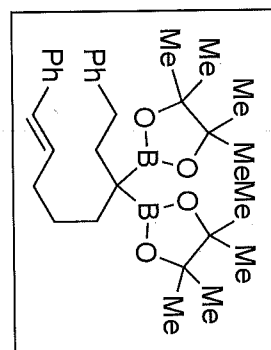

Compound 21

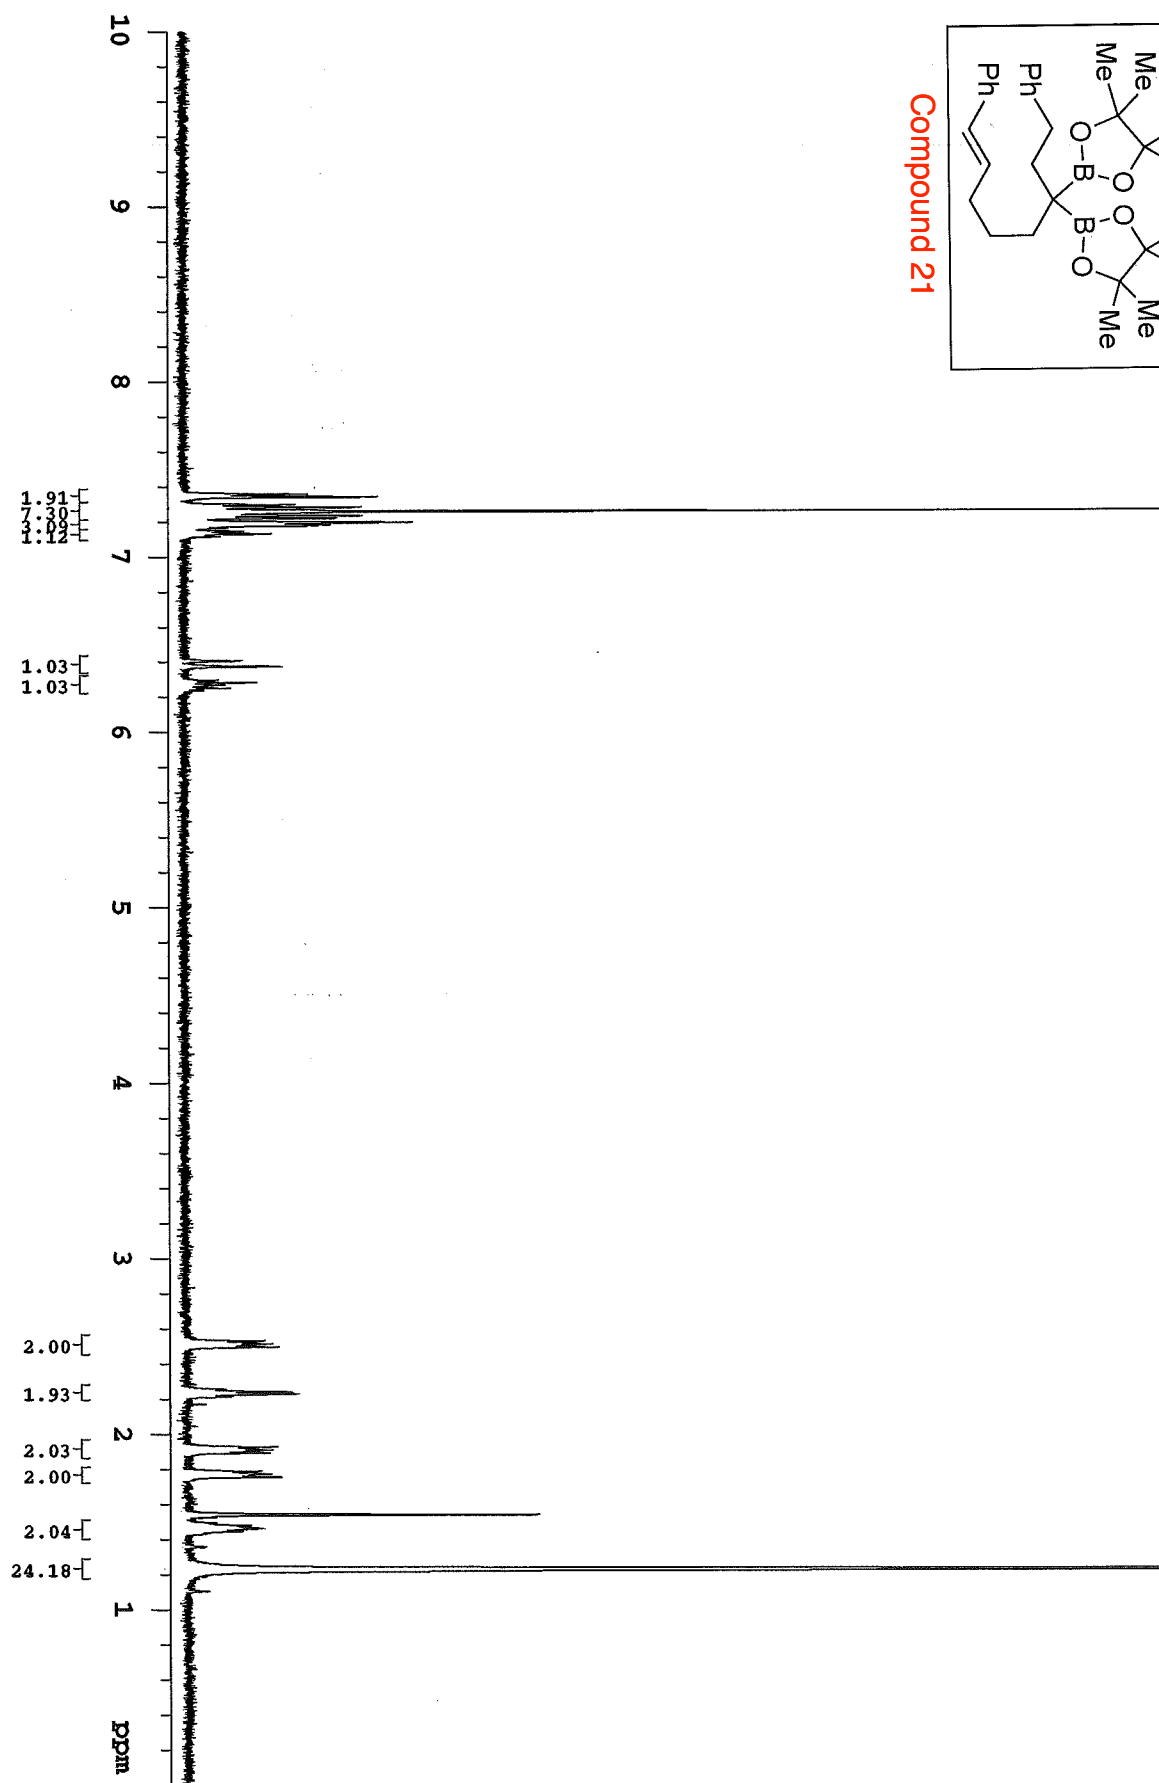



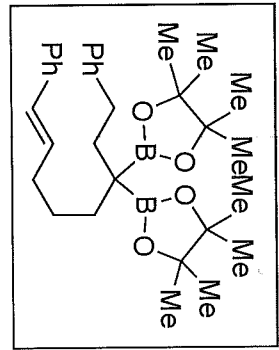

Compound 21

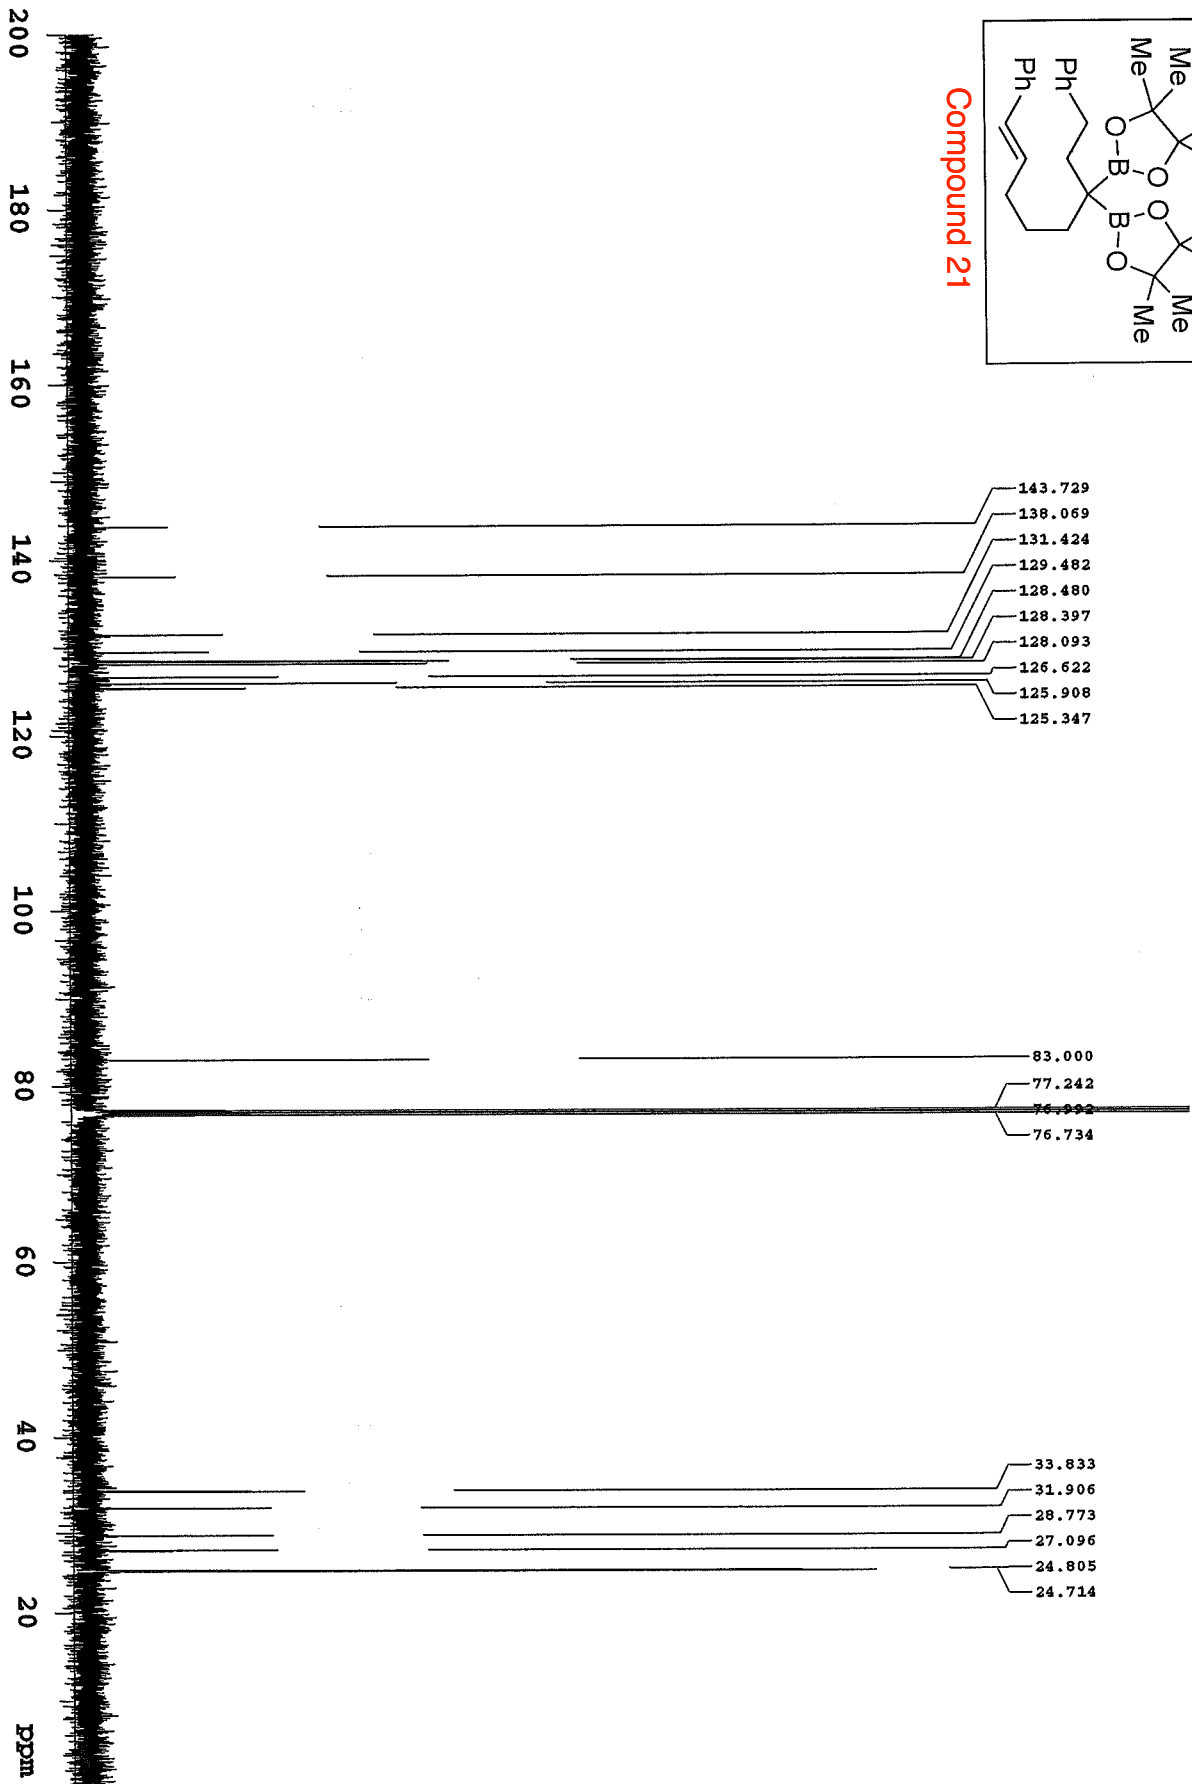

Compound 22

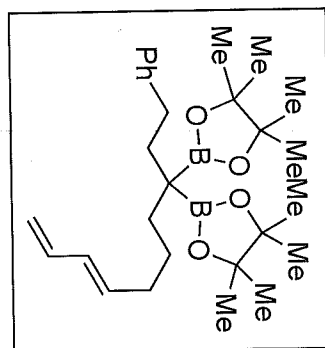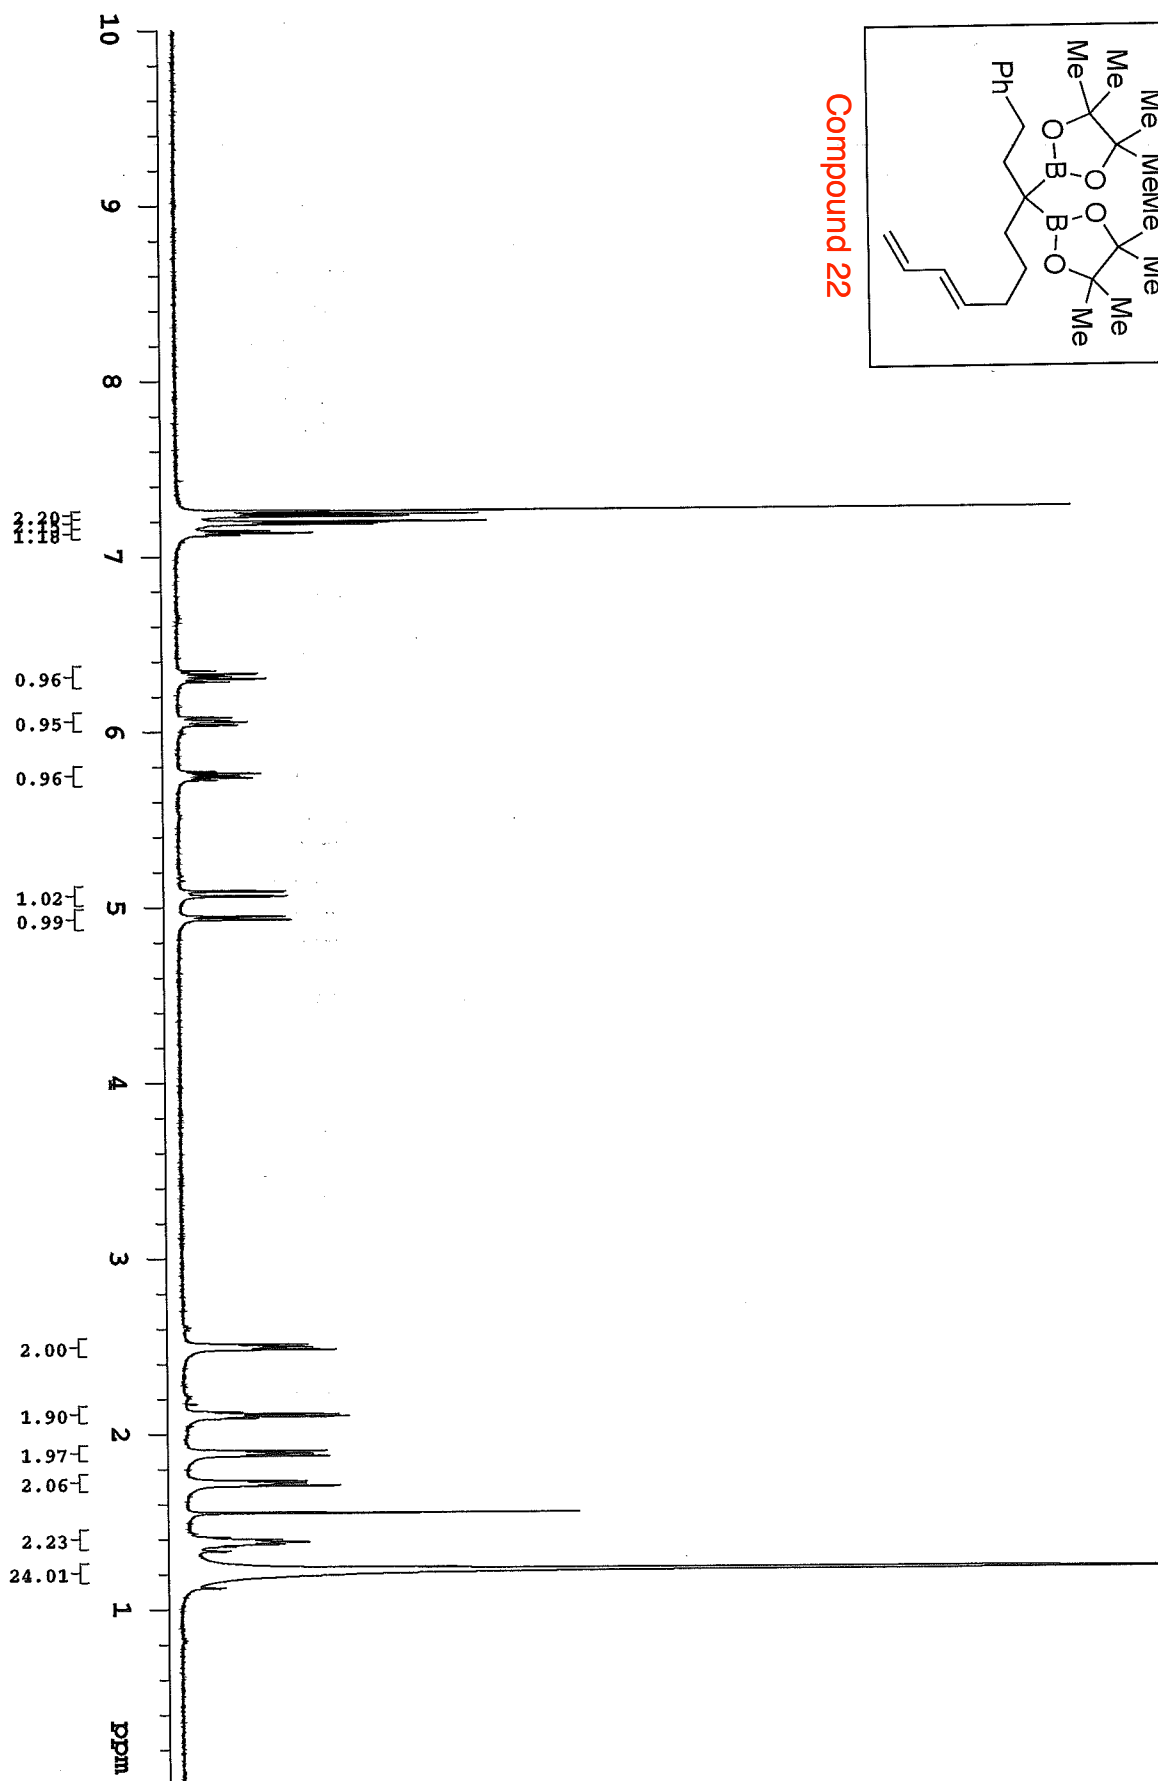

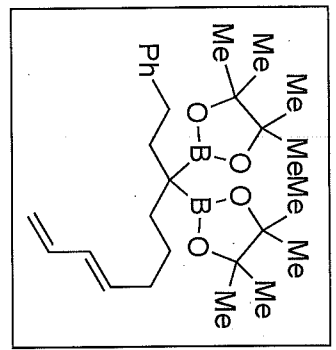

Compound 22

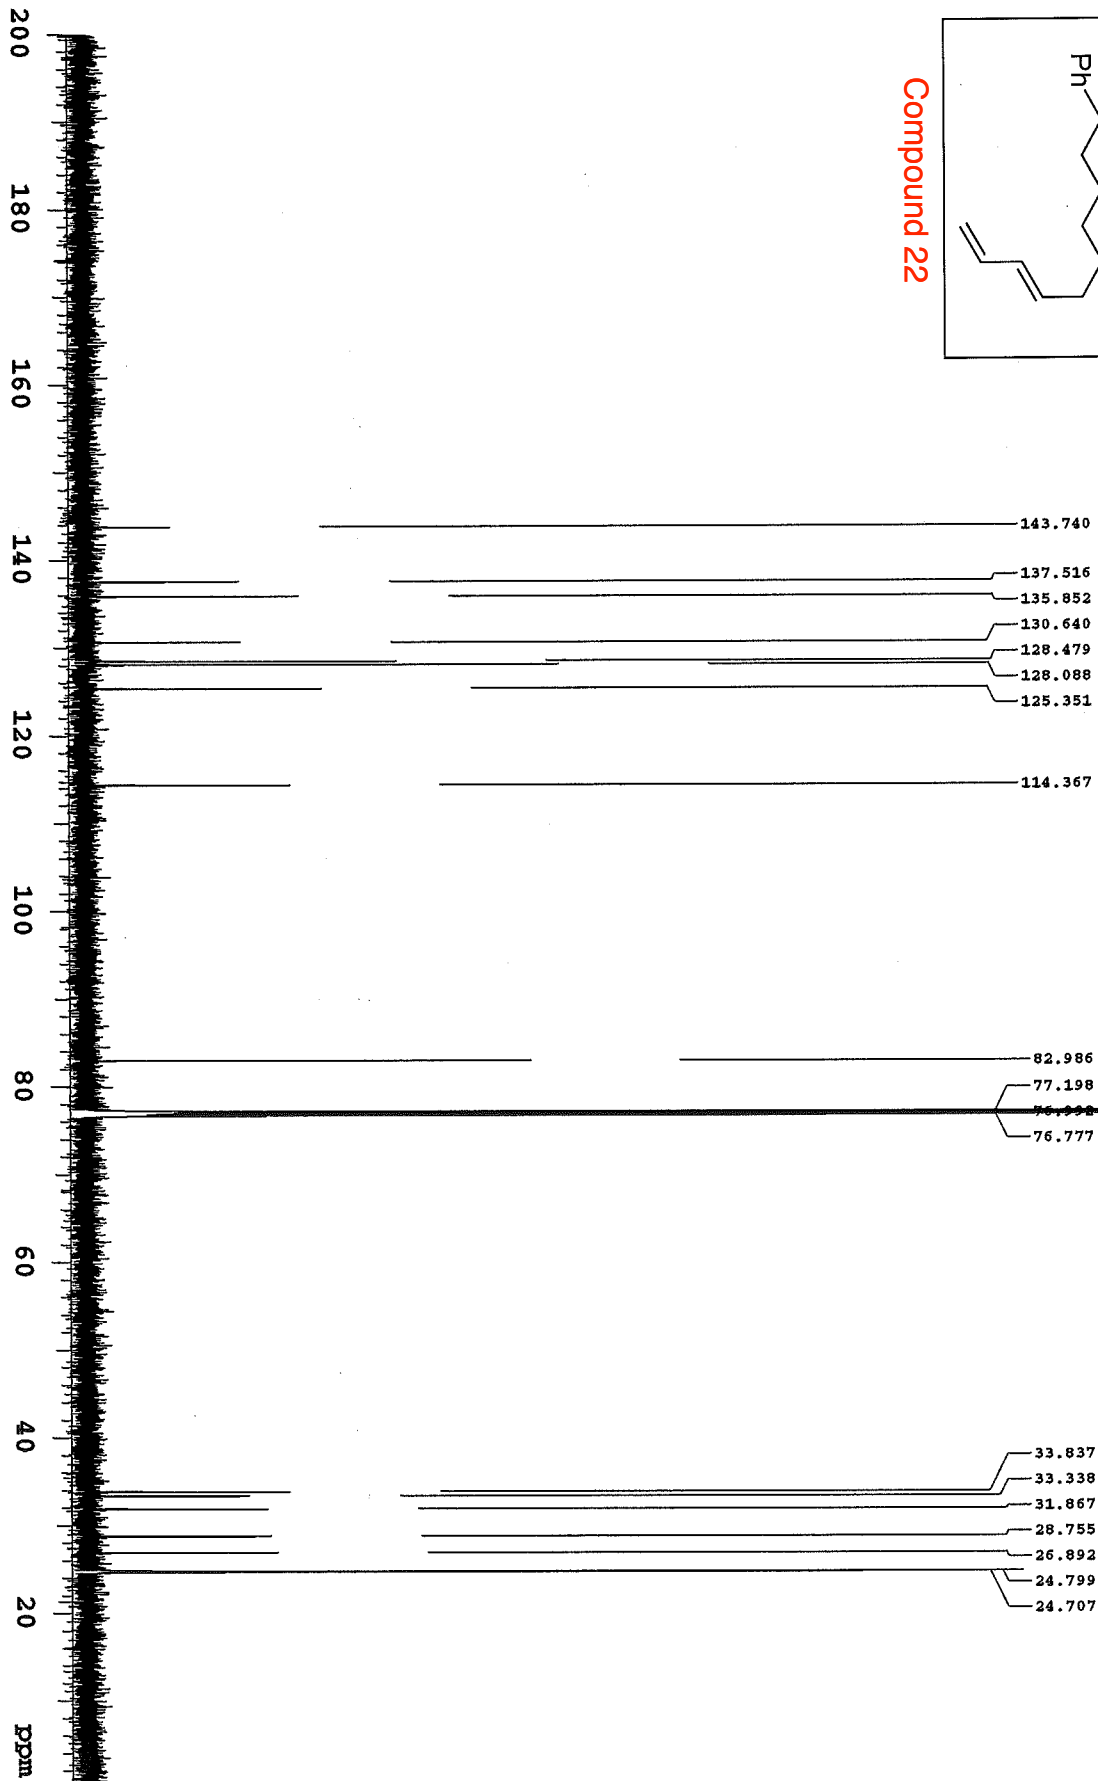

Compound S6

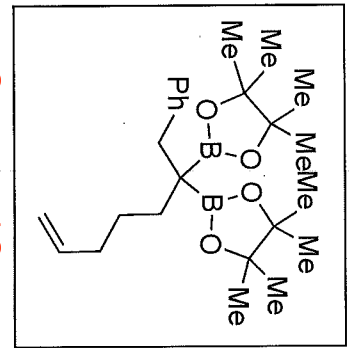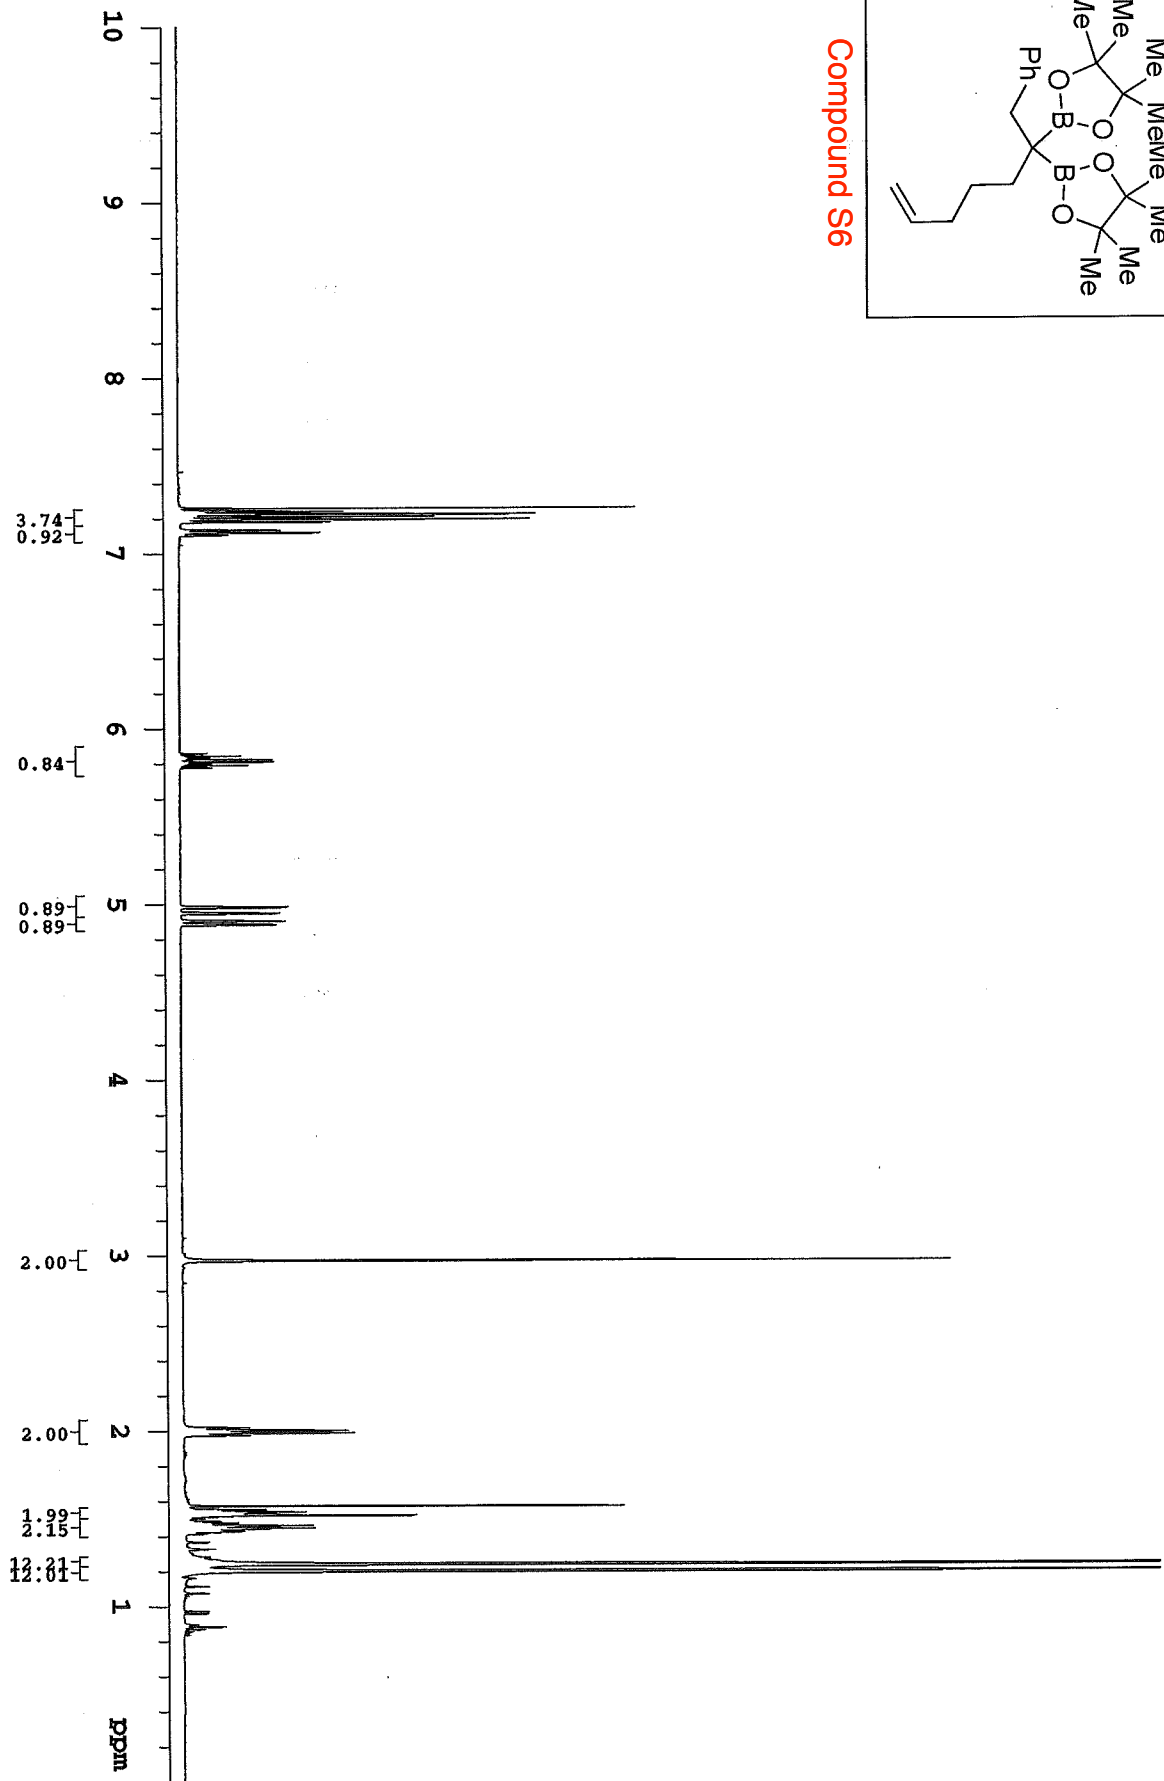

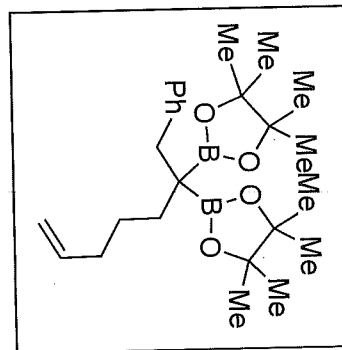

Compound S6

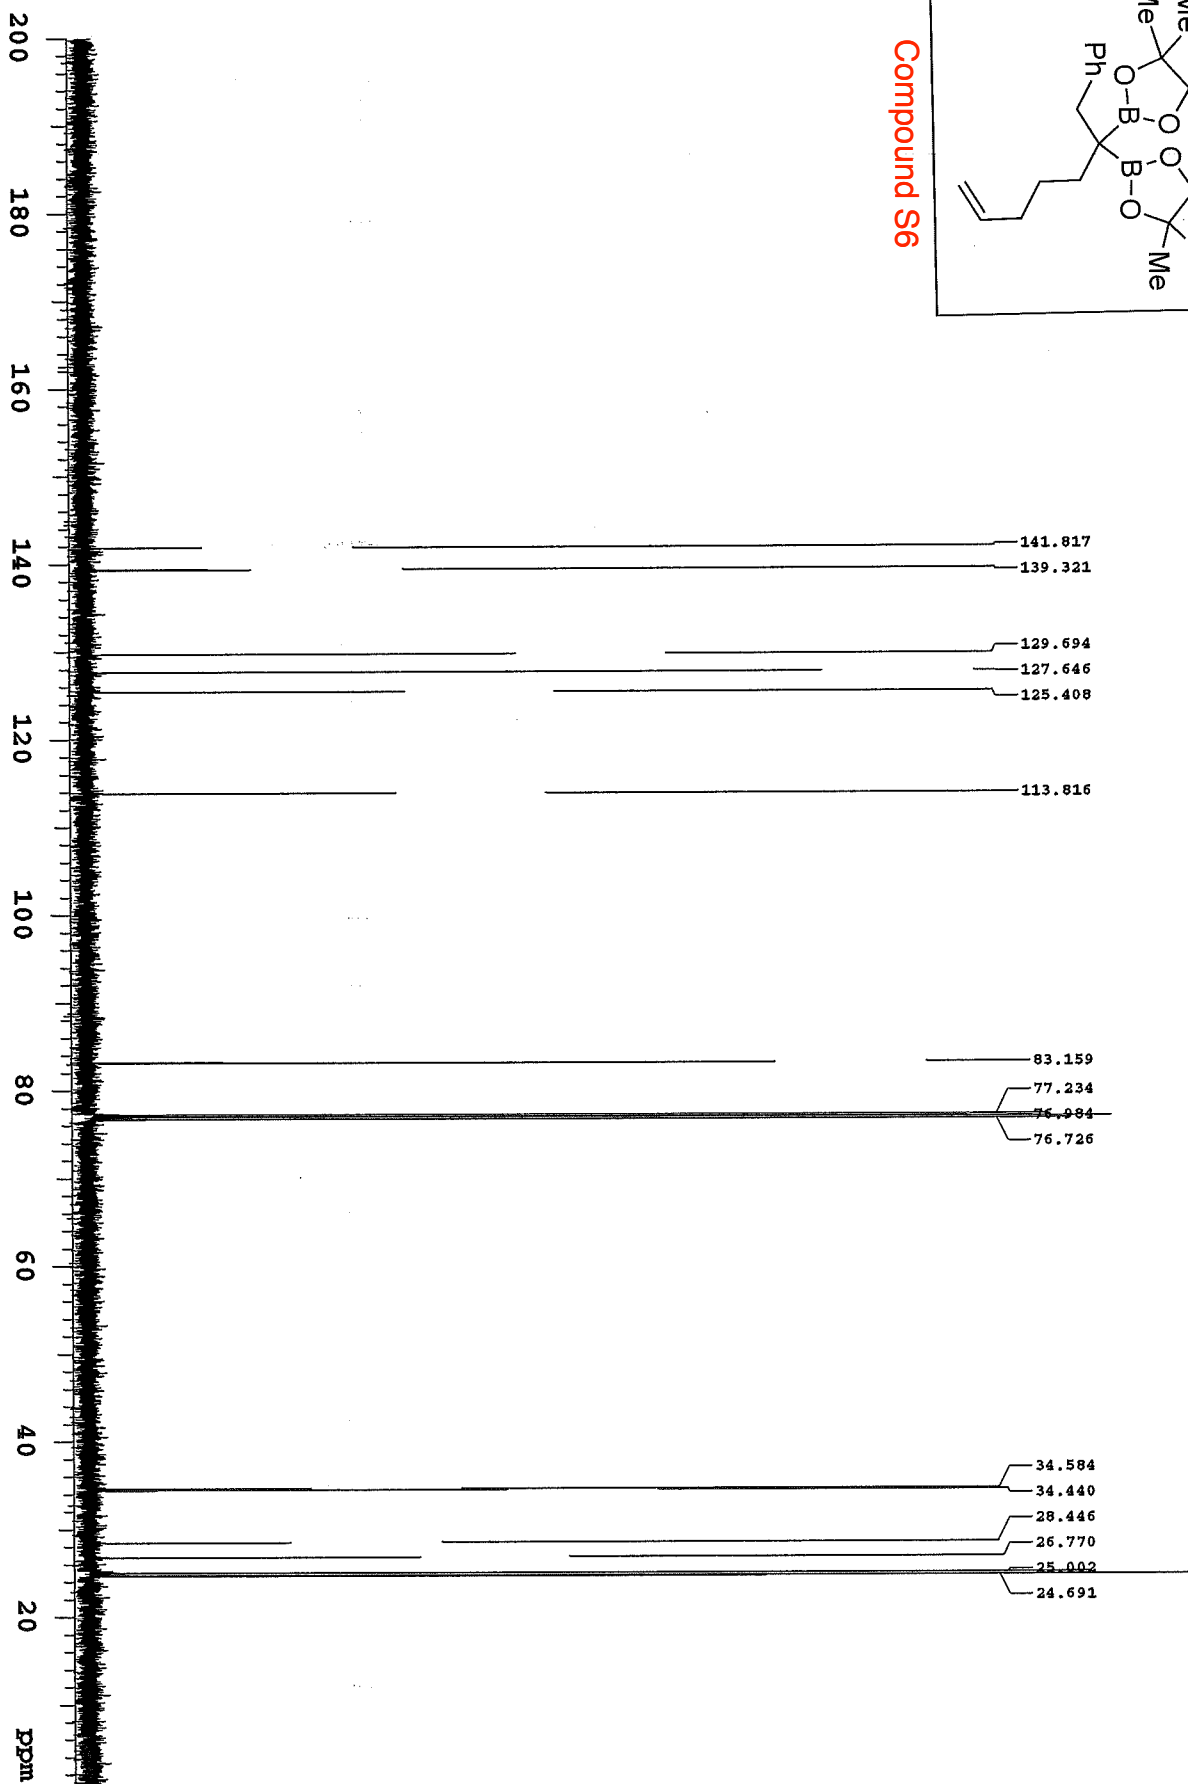

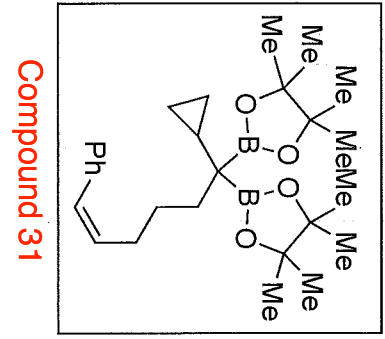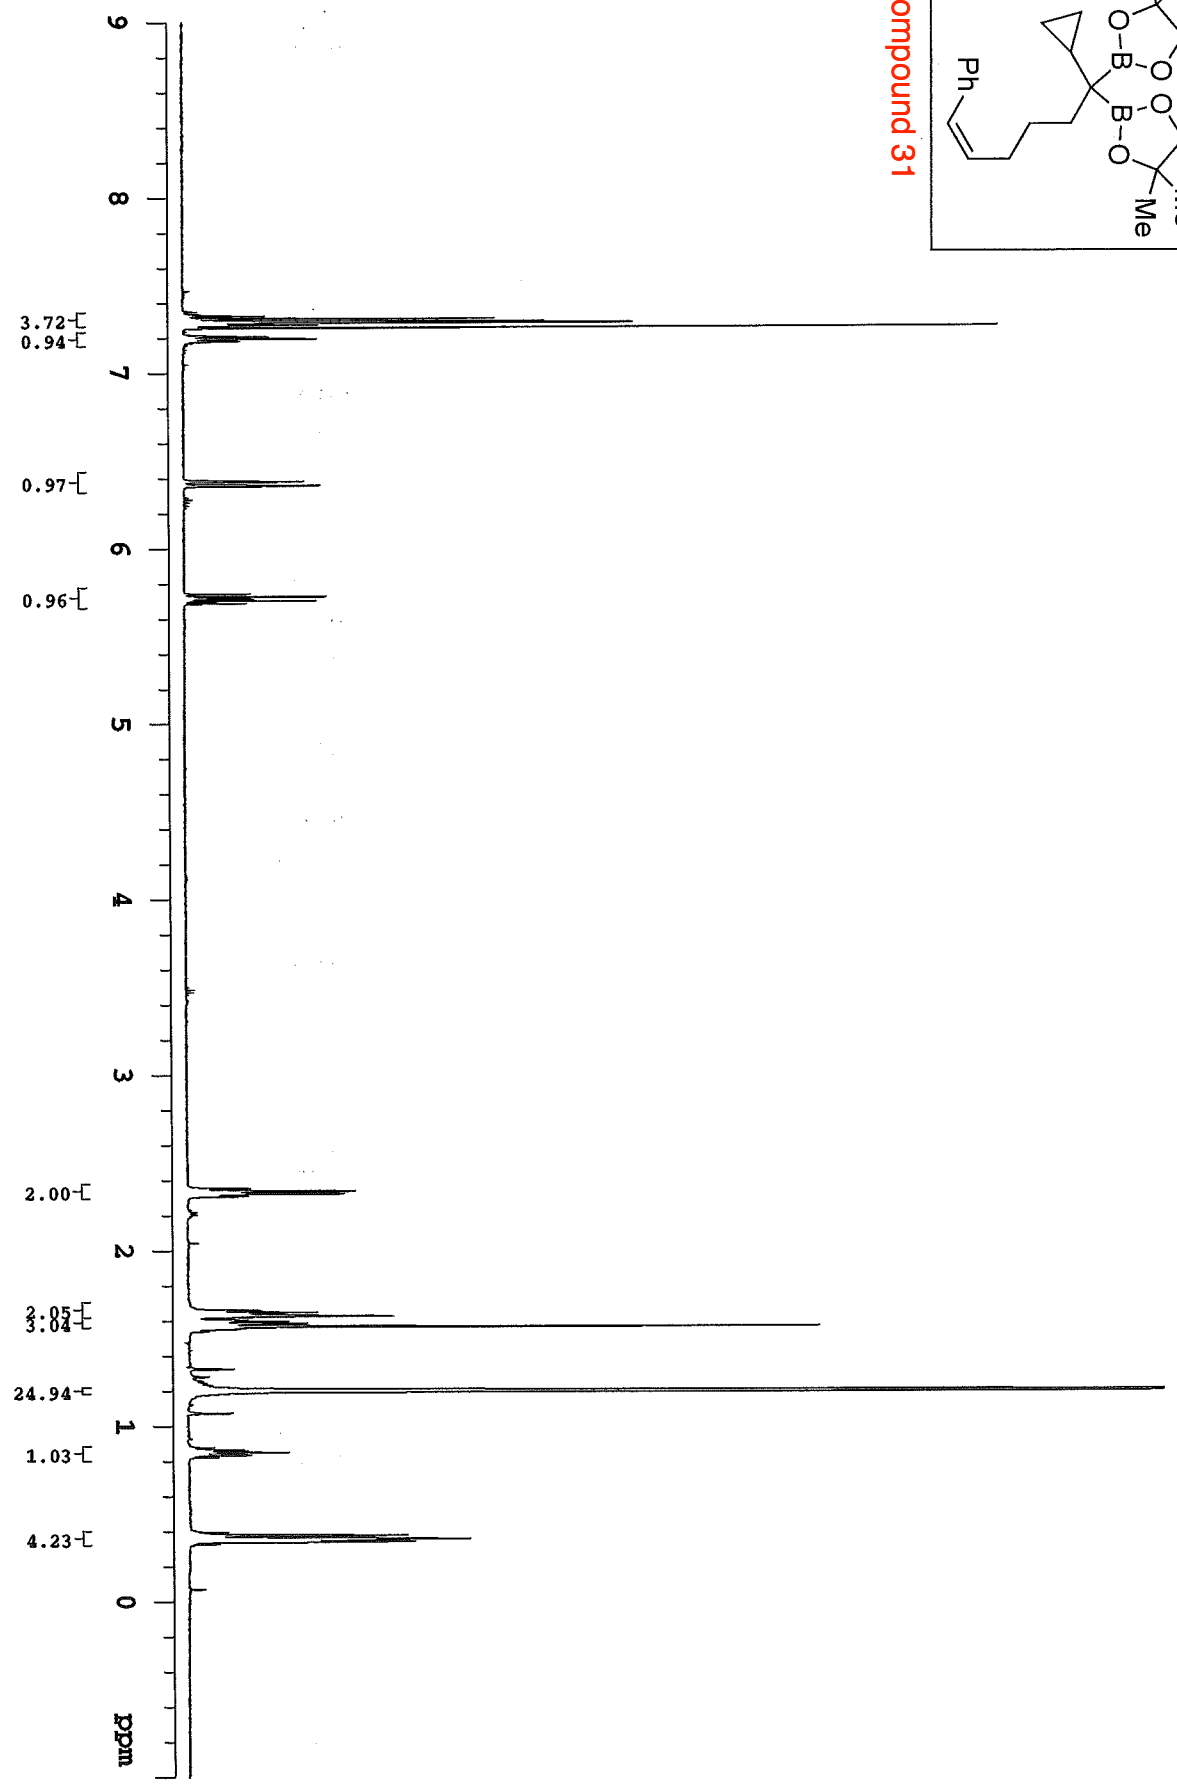

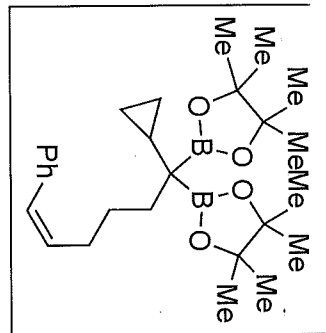

Compound 31

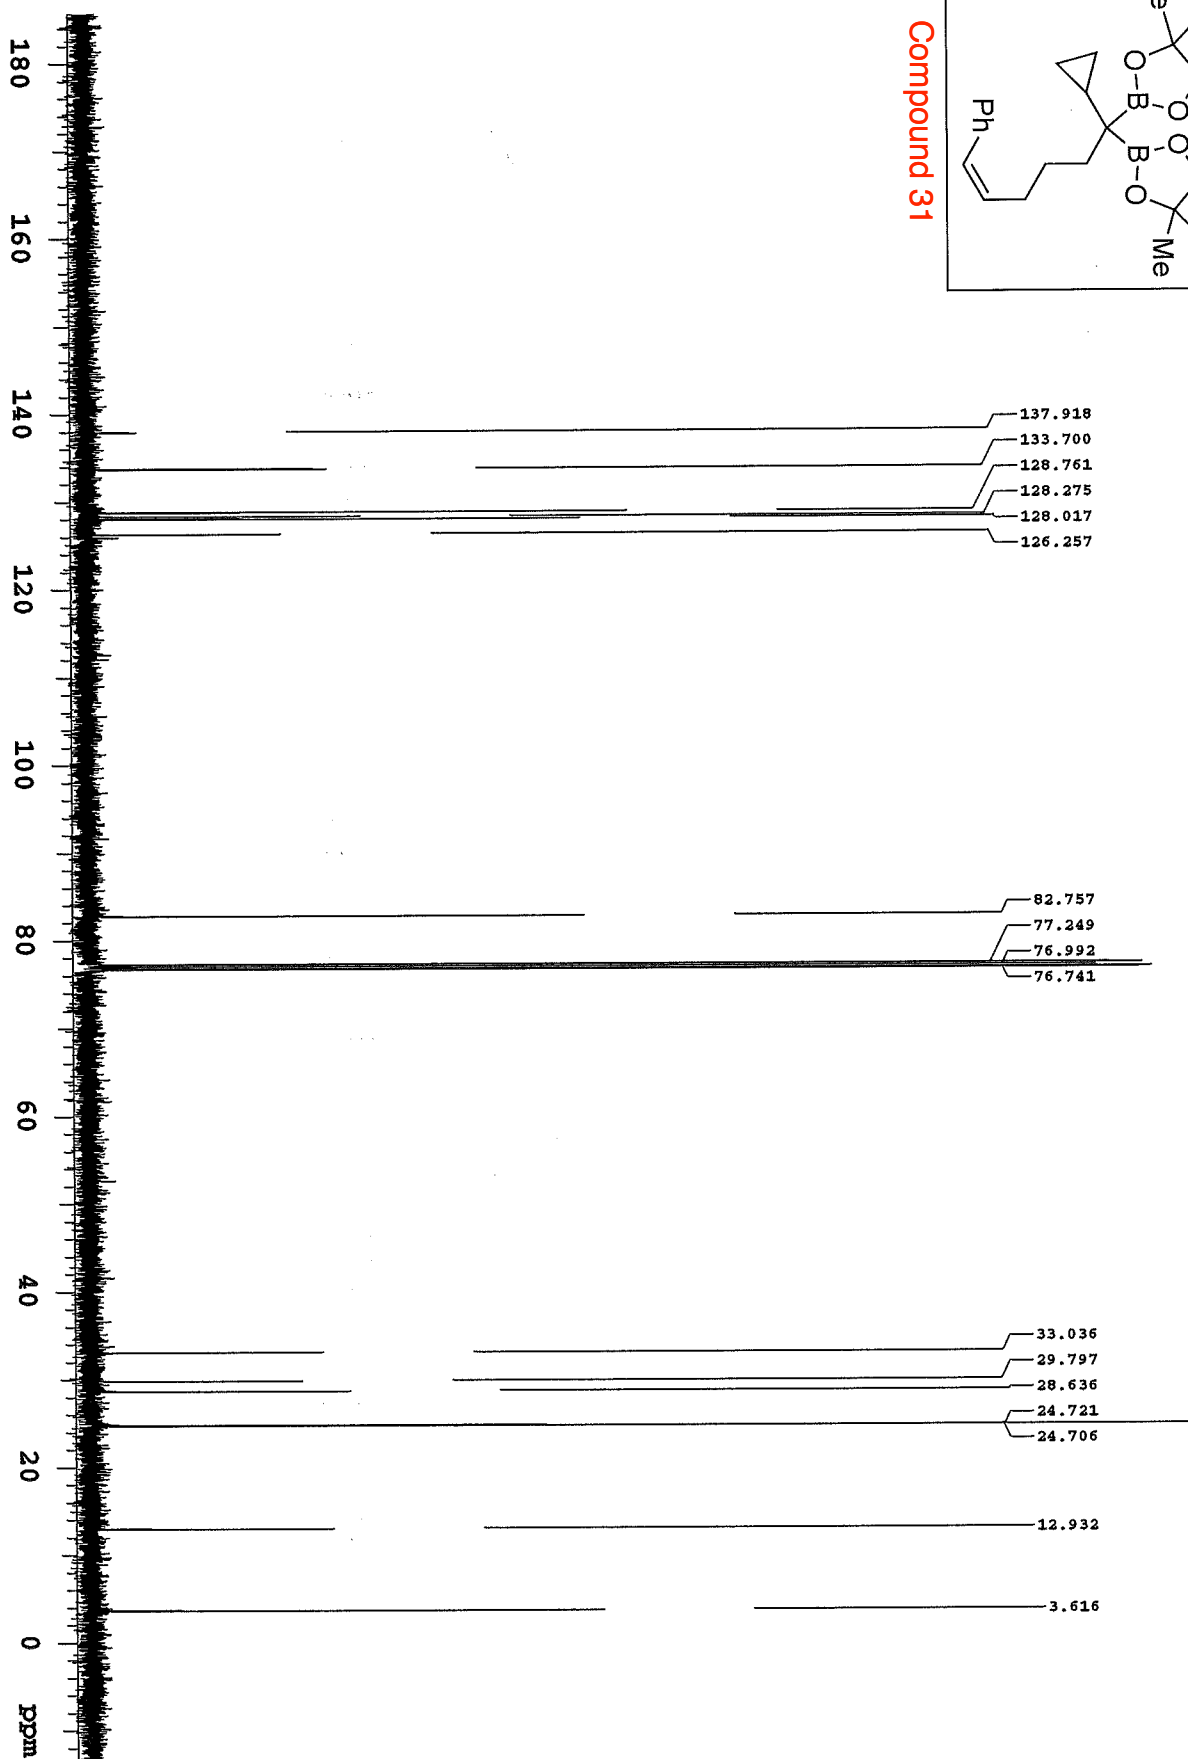

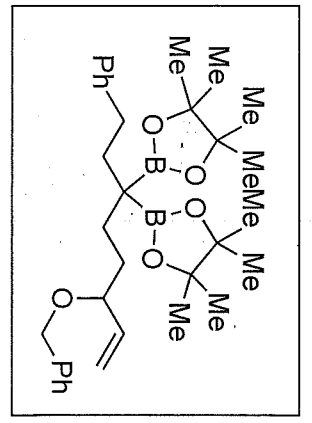

Compound S7

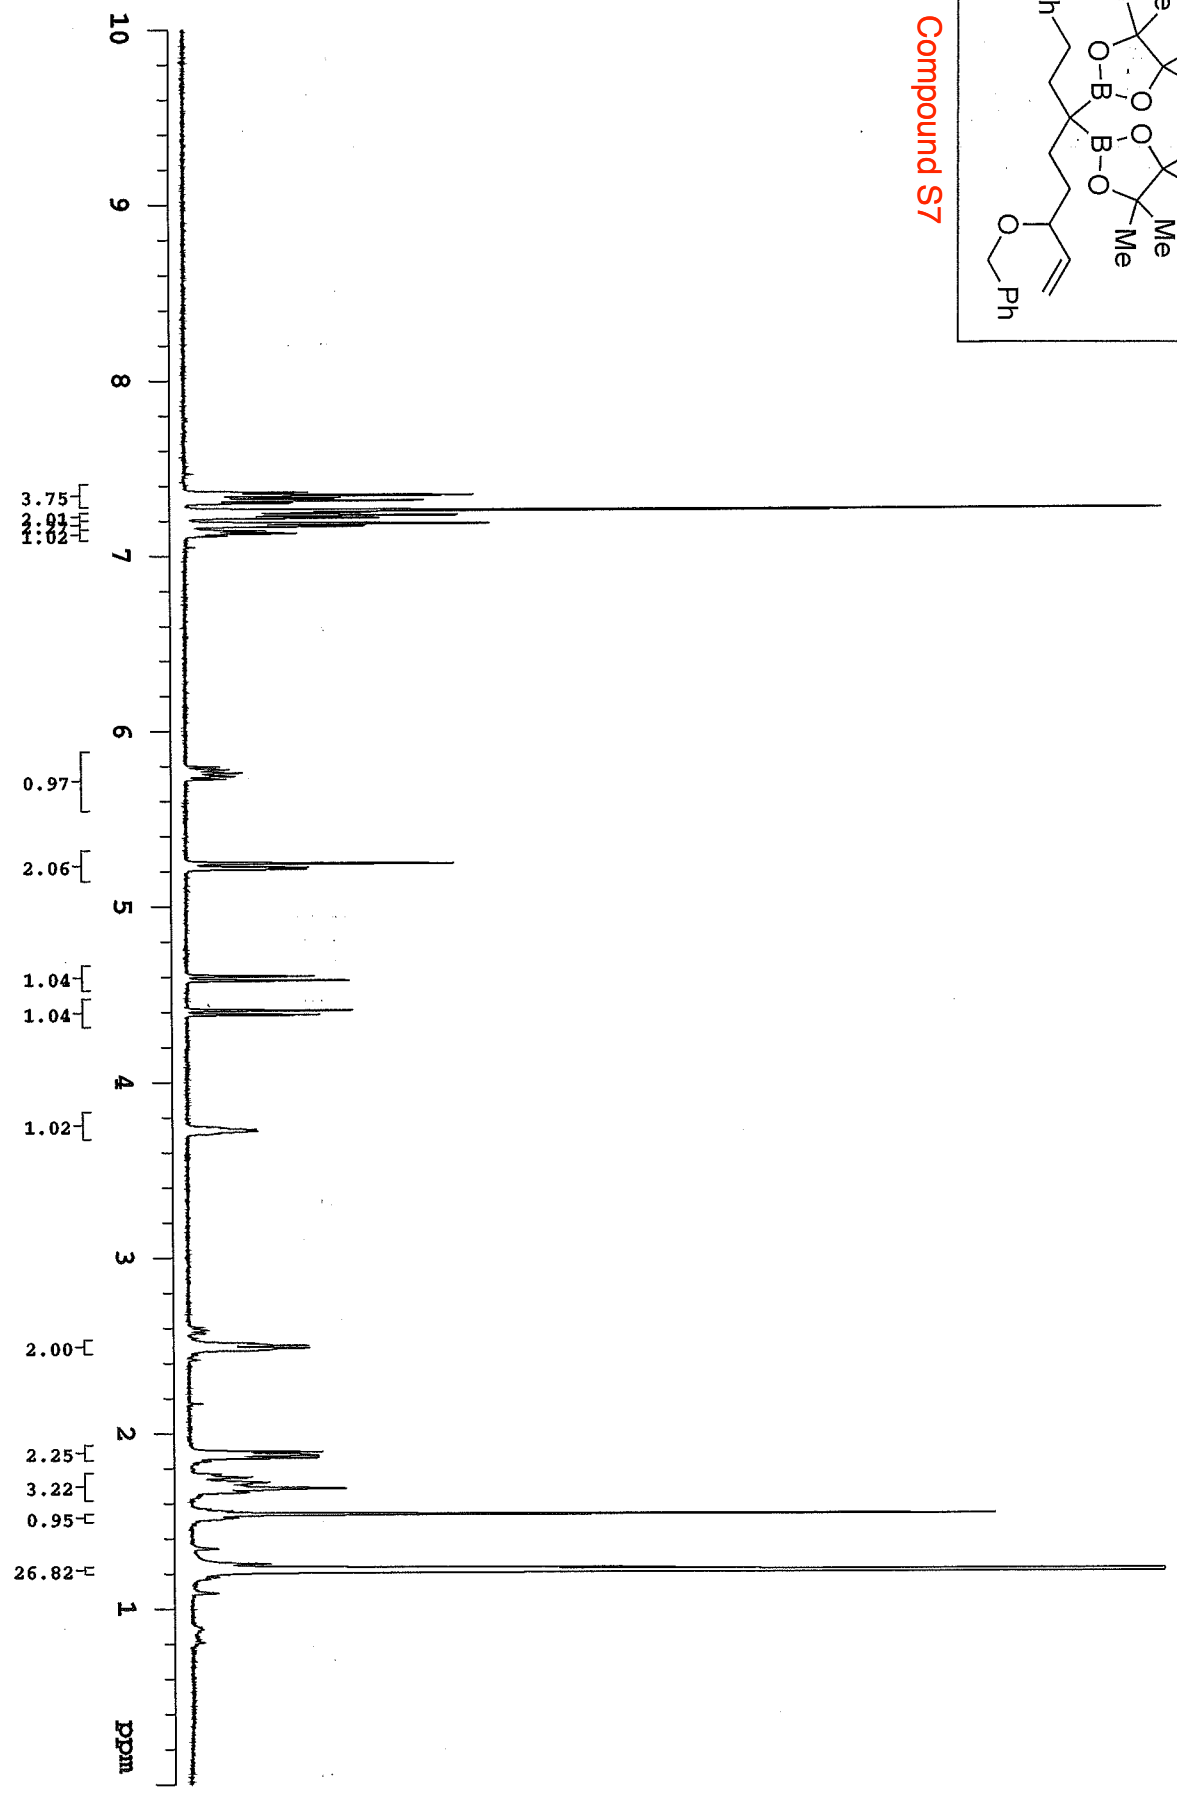



Compound S7

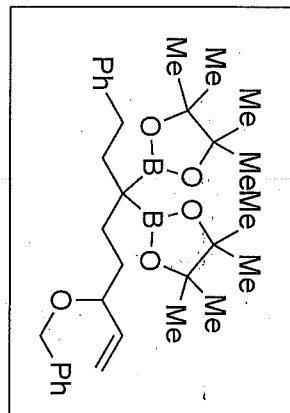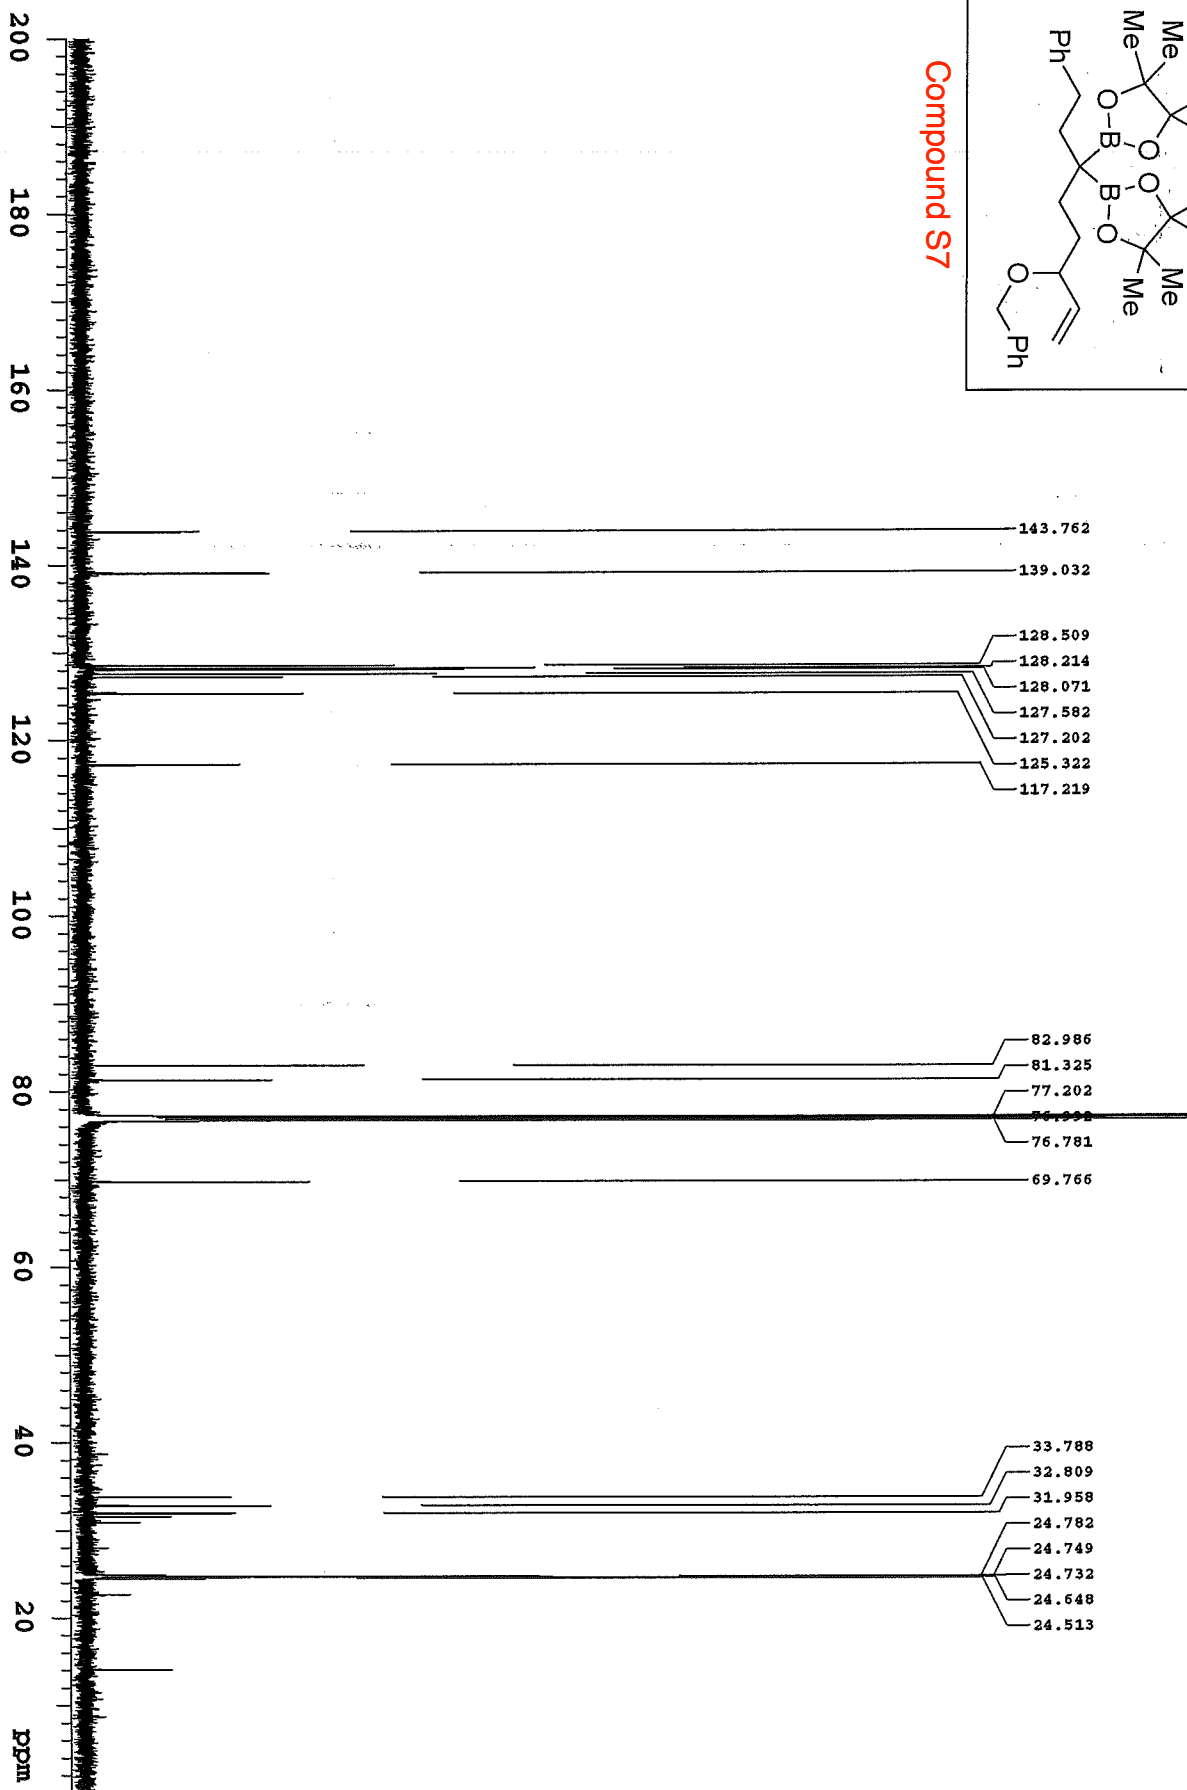

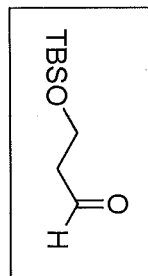

Compound S8

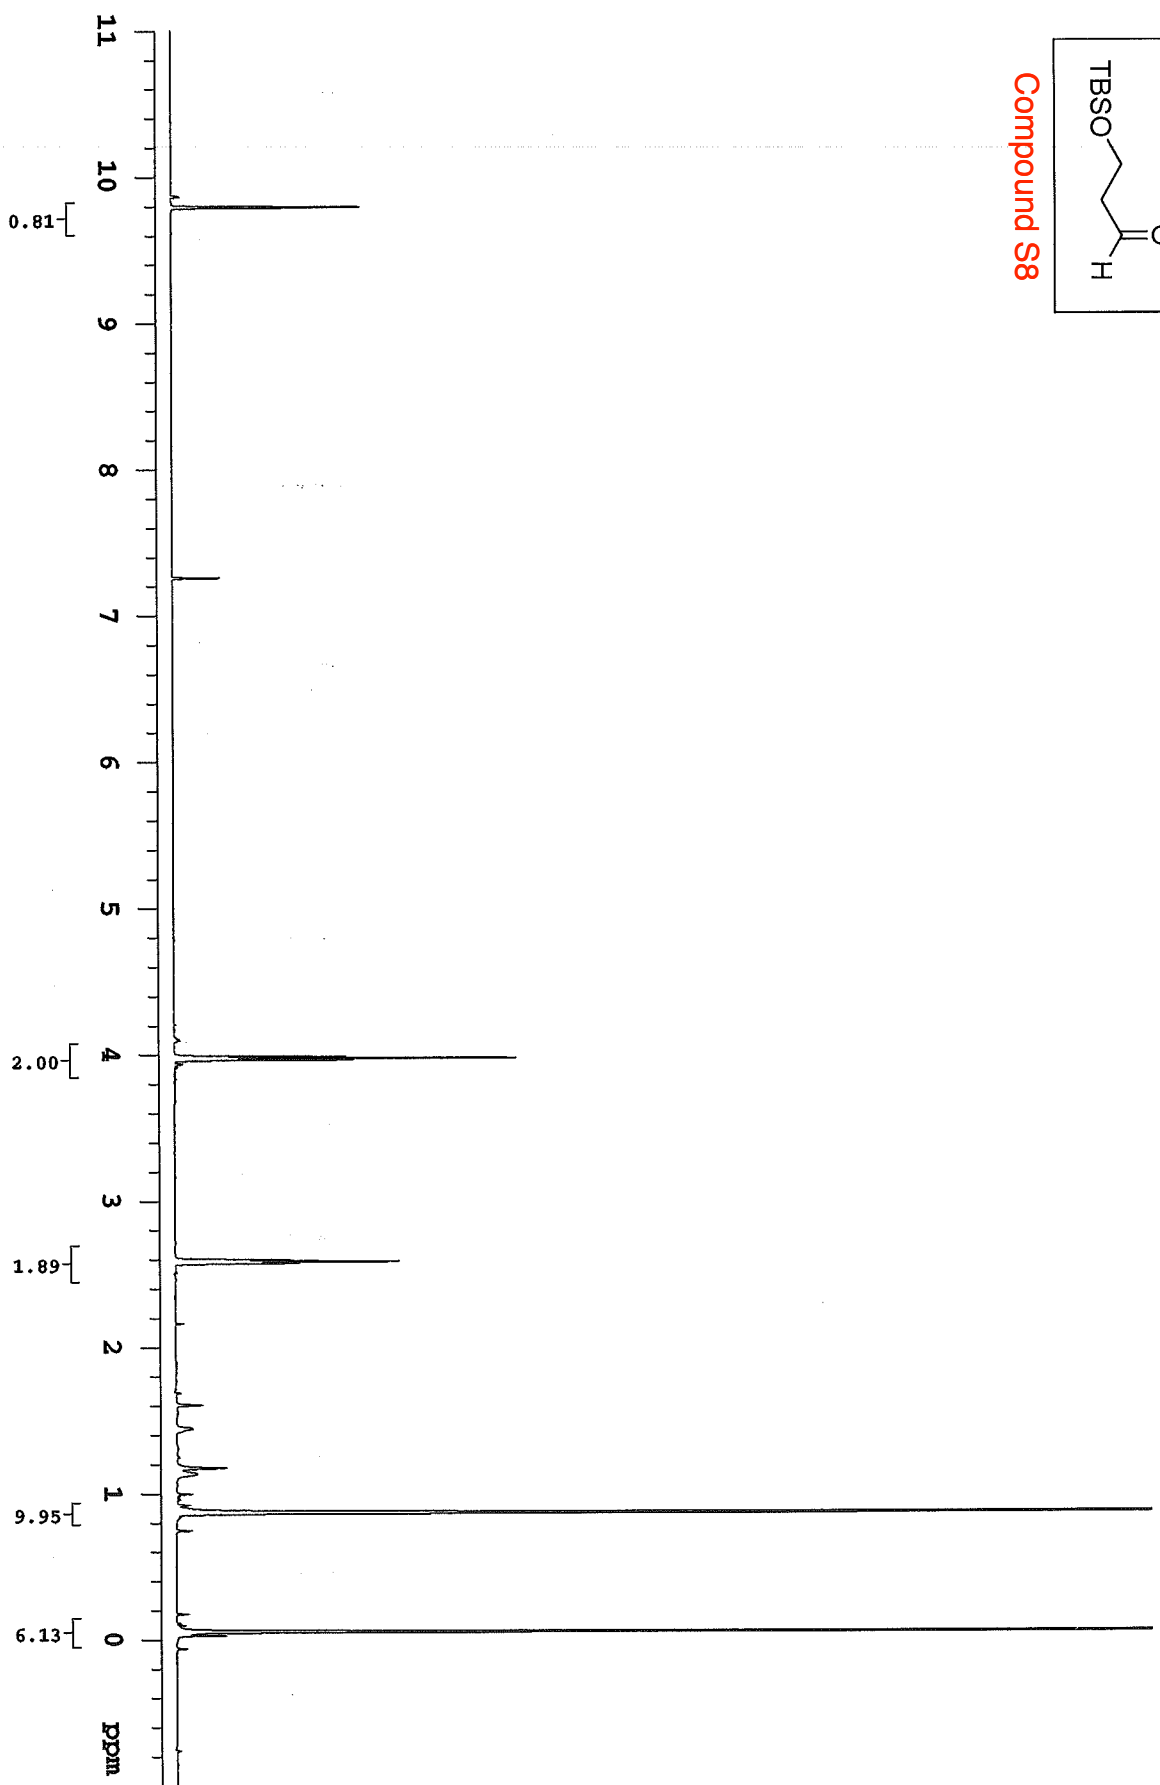

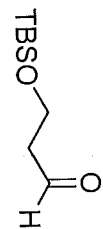

Compound S8

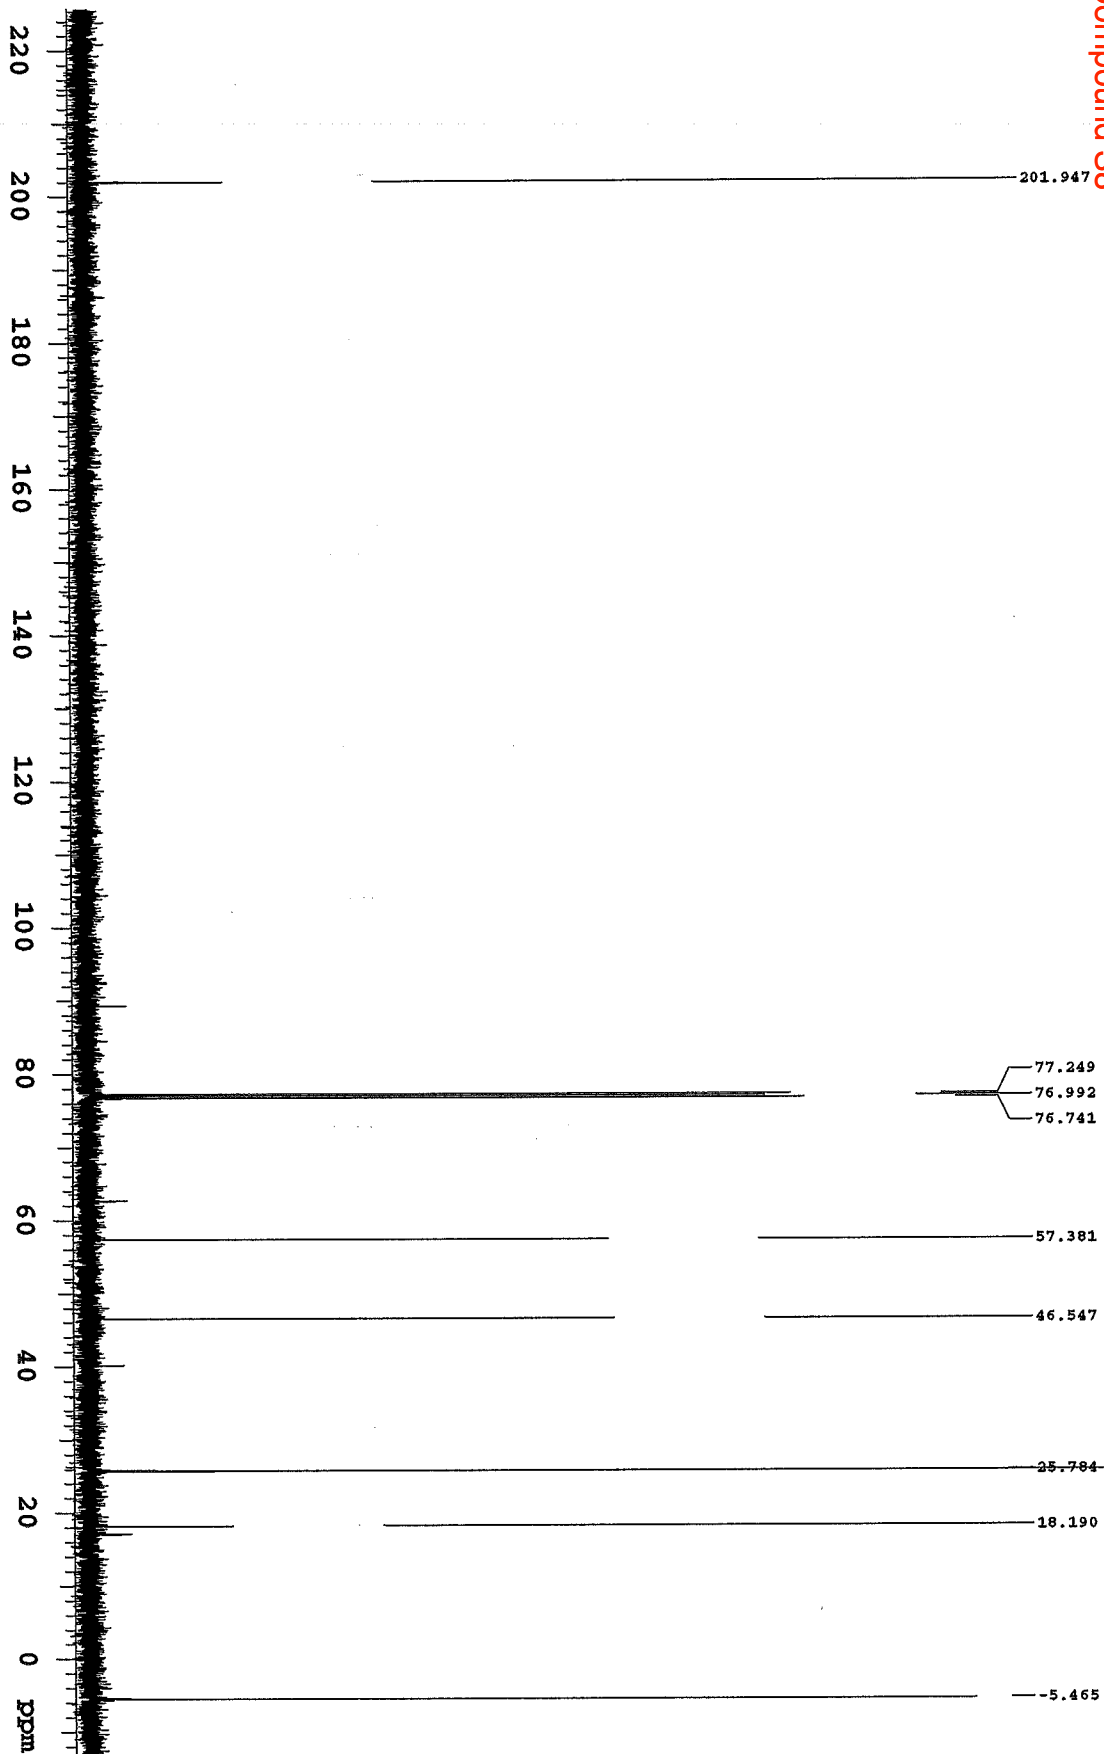

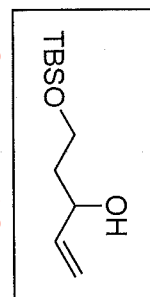

Compound S9

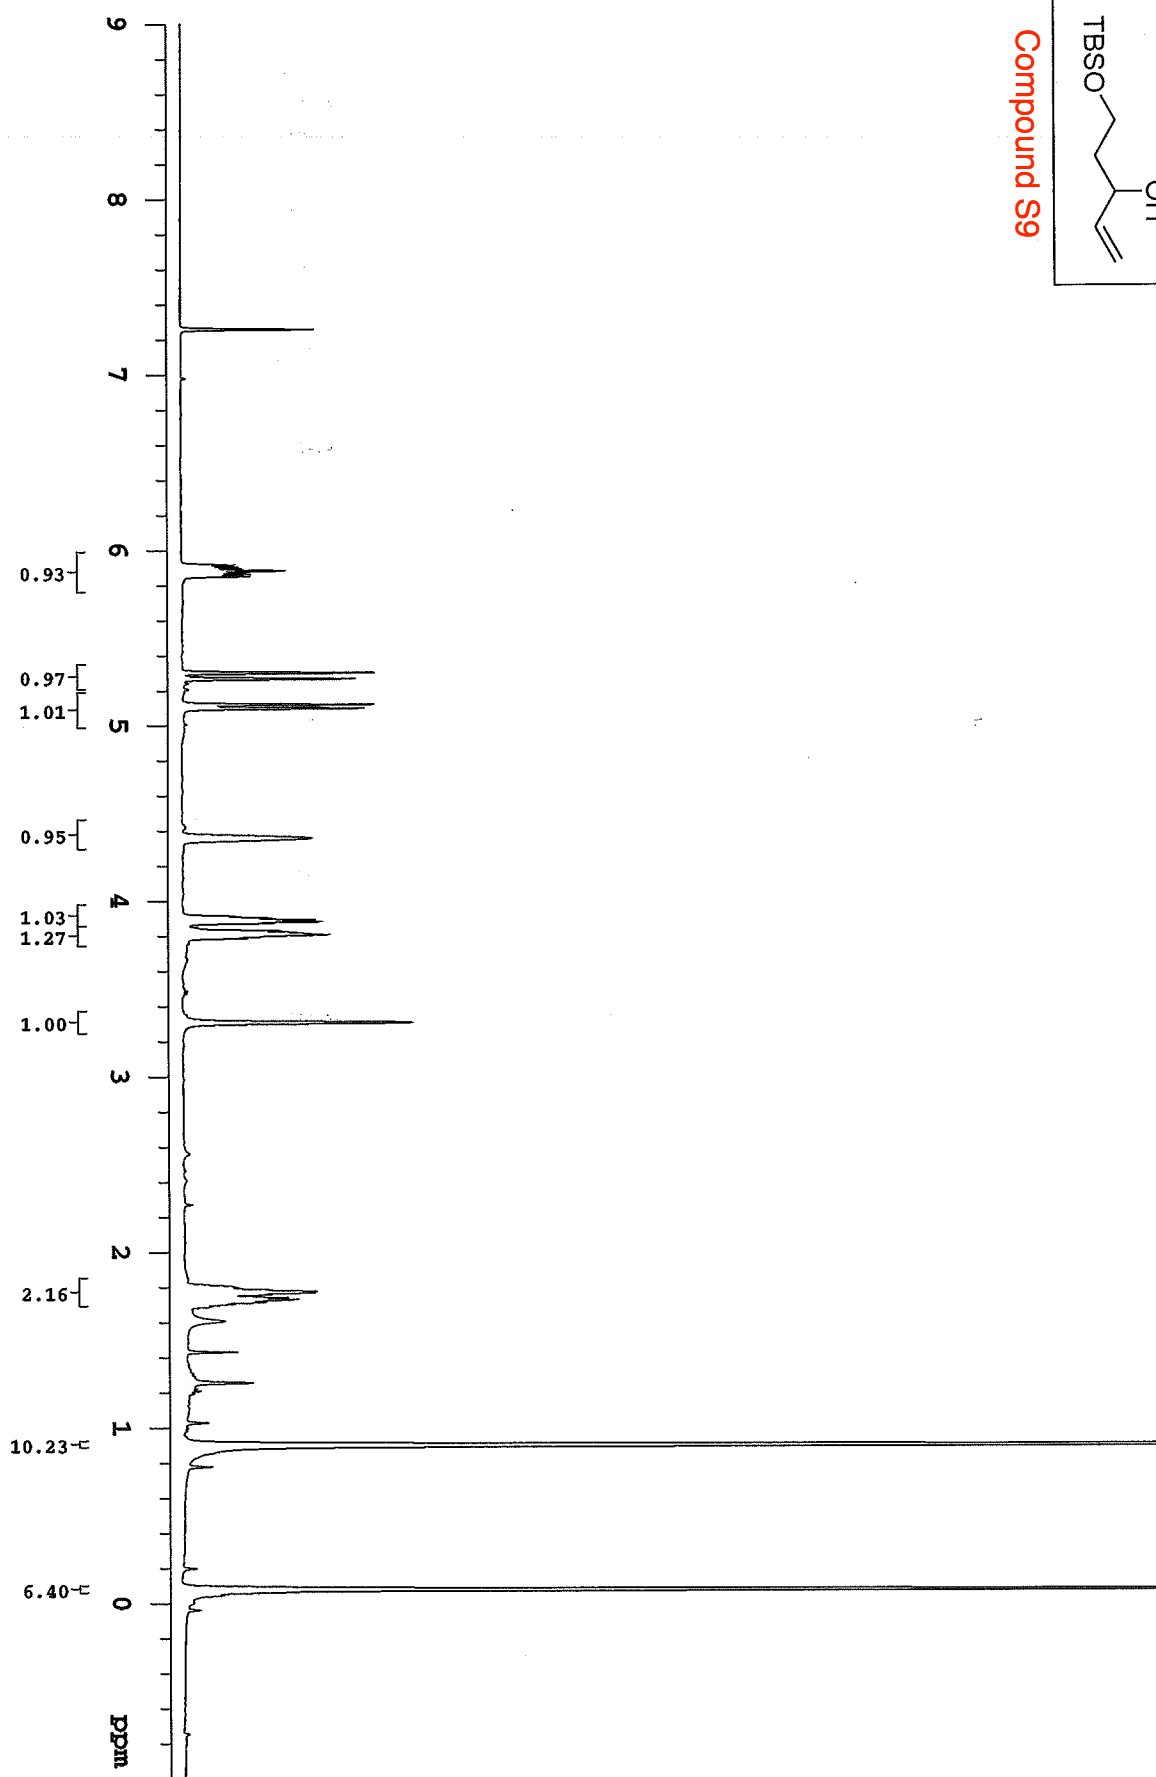

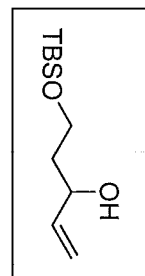

Compound S9

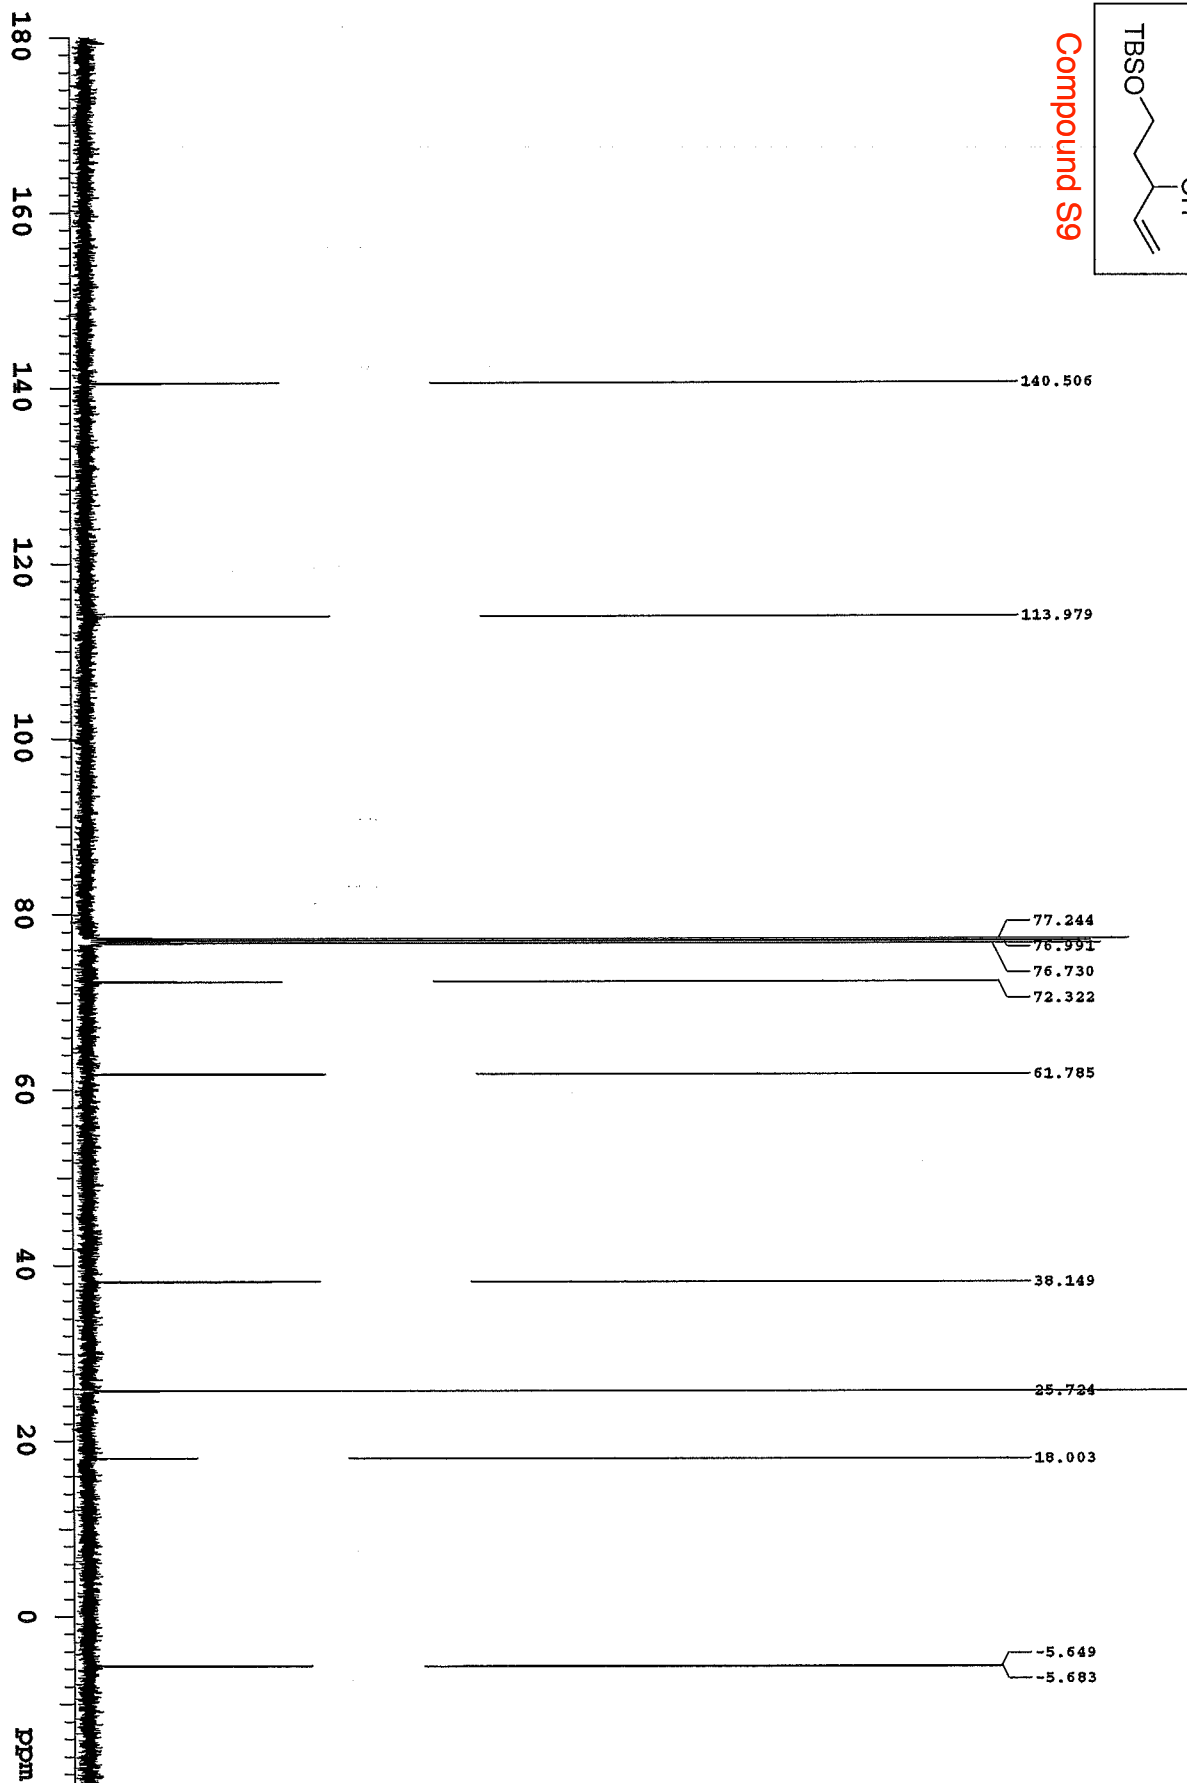

Compound S10

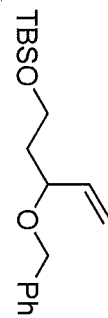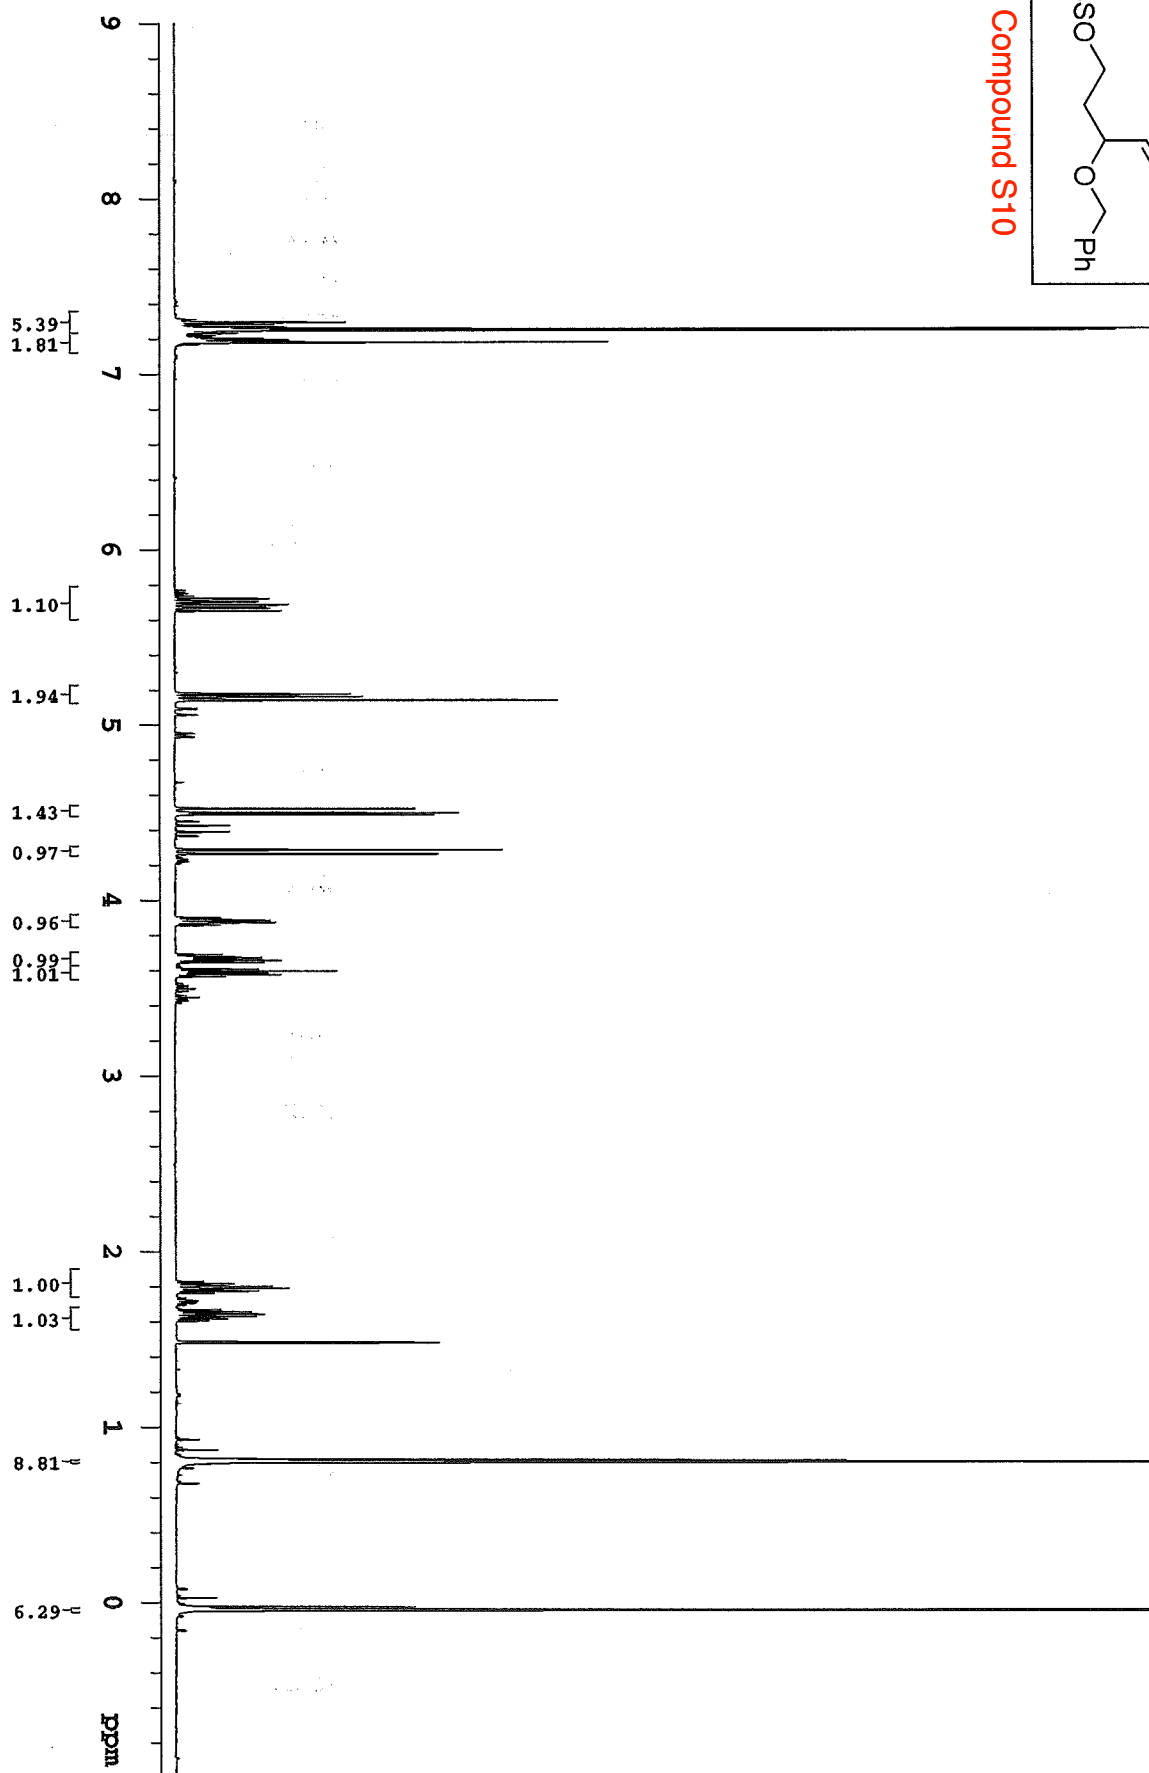

Compound S10

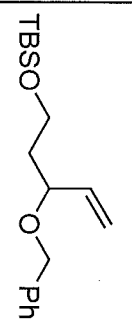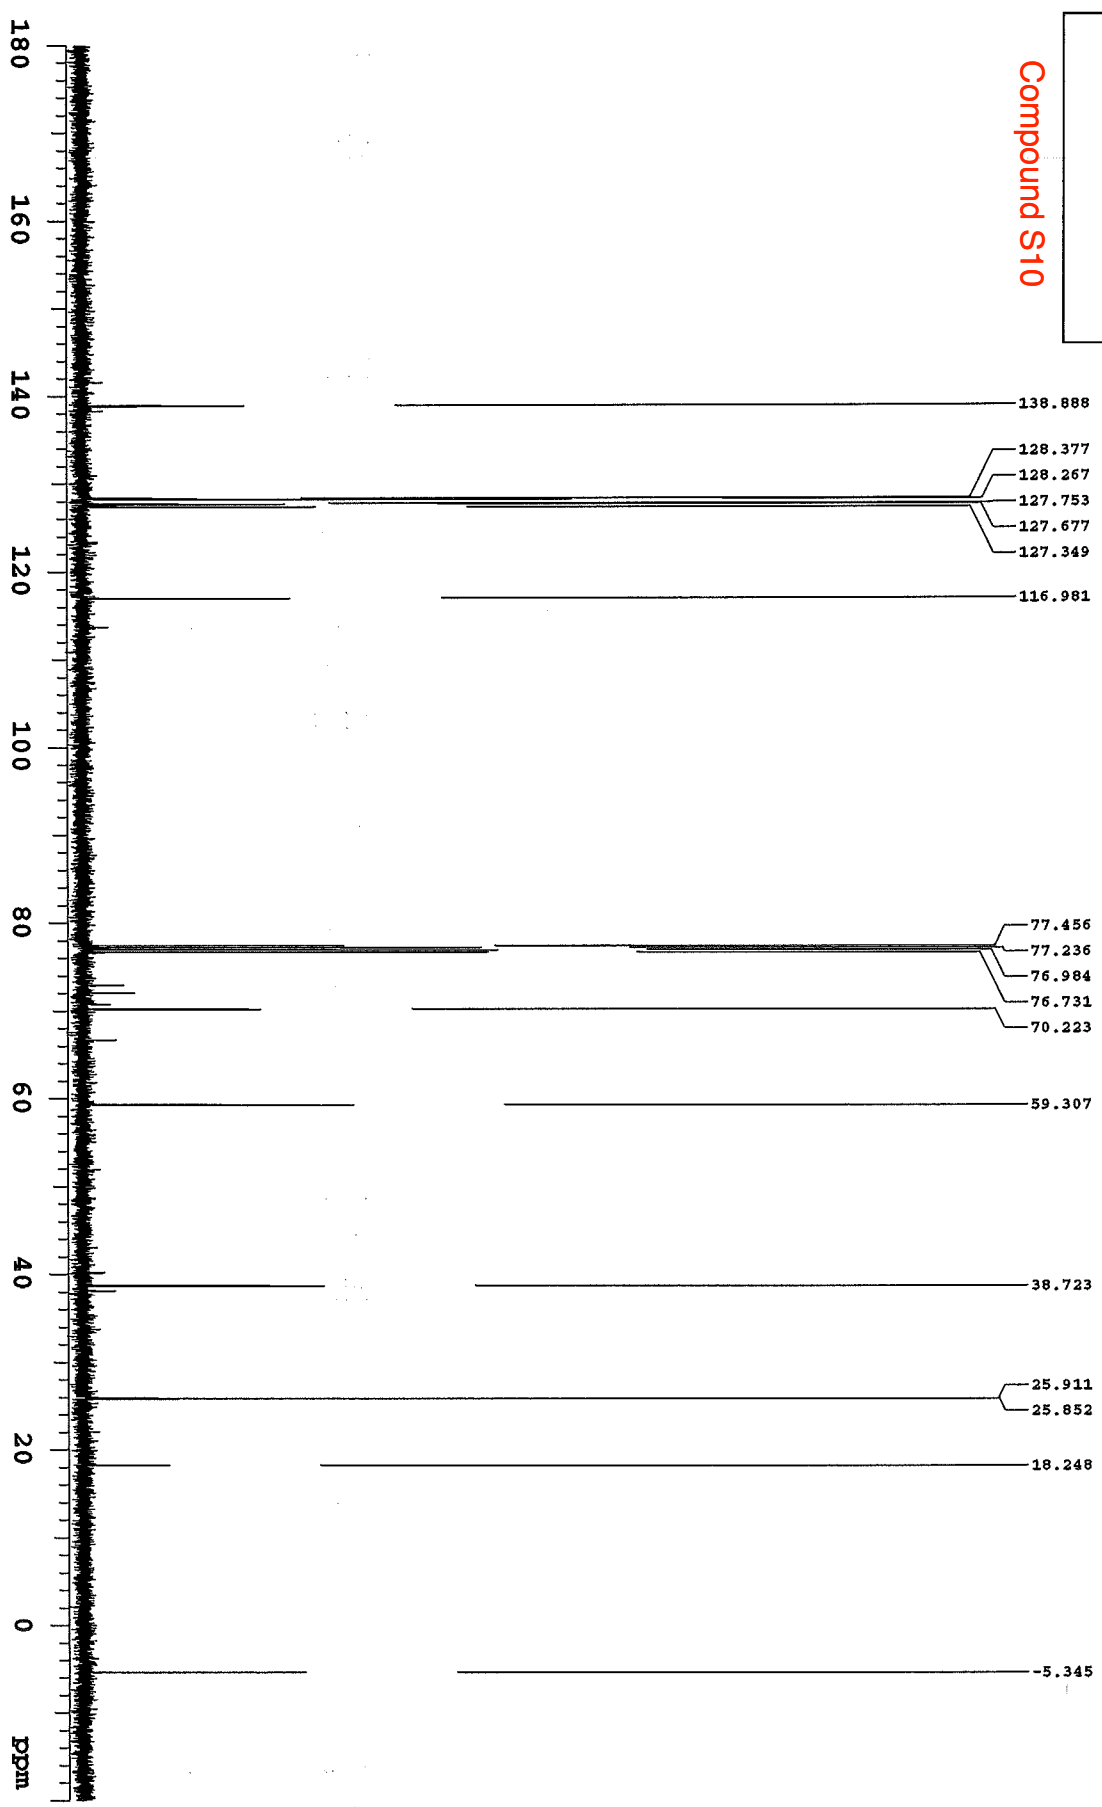

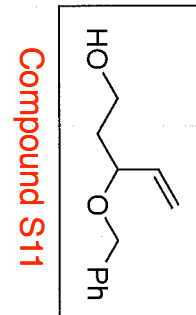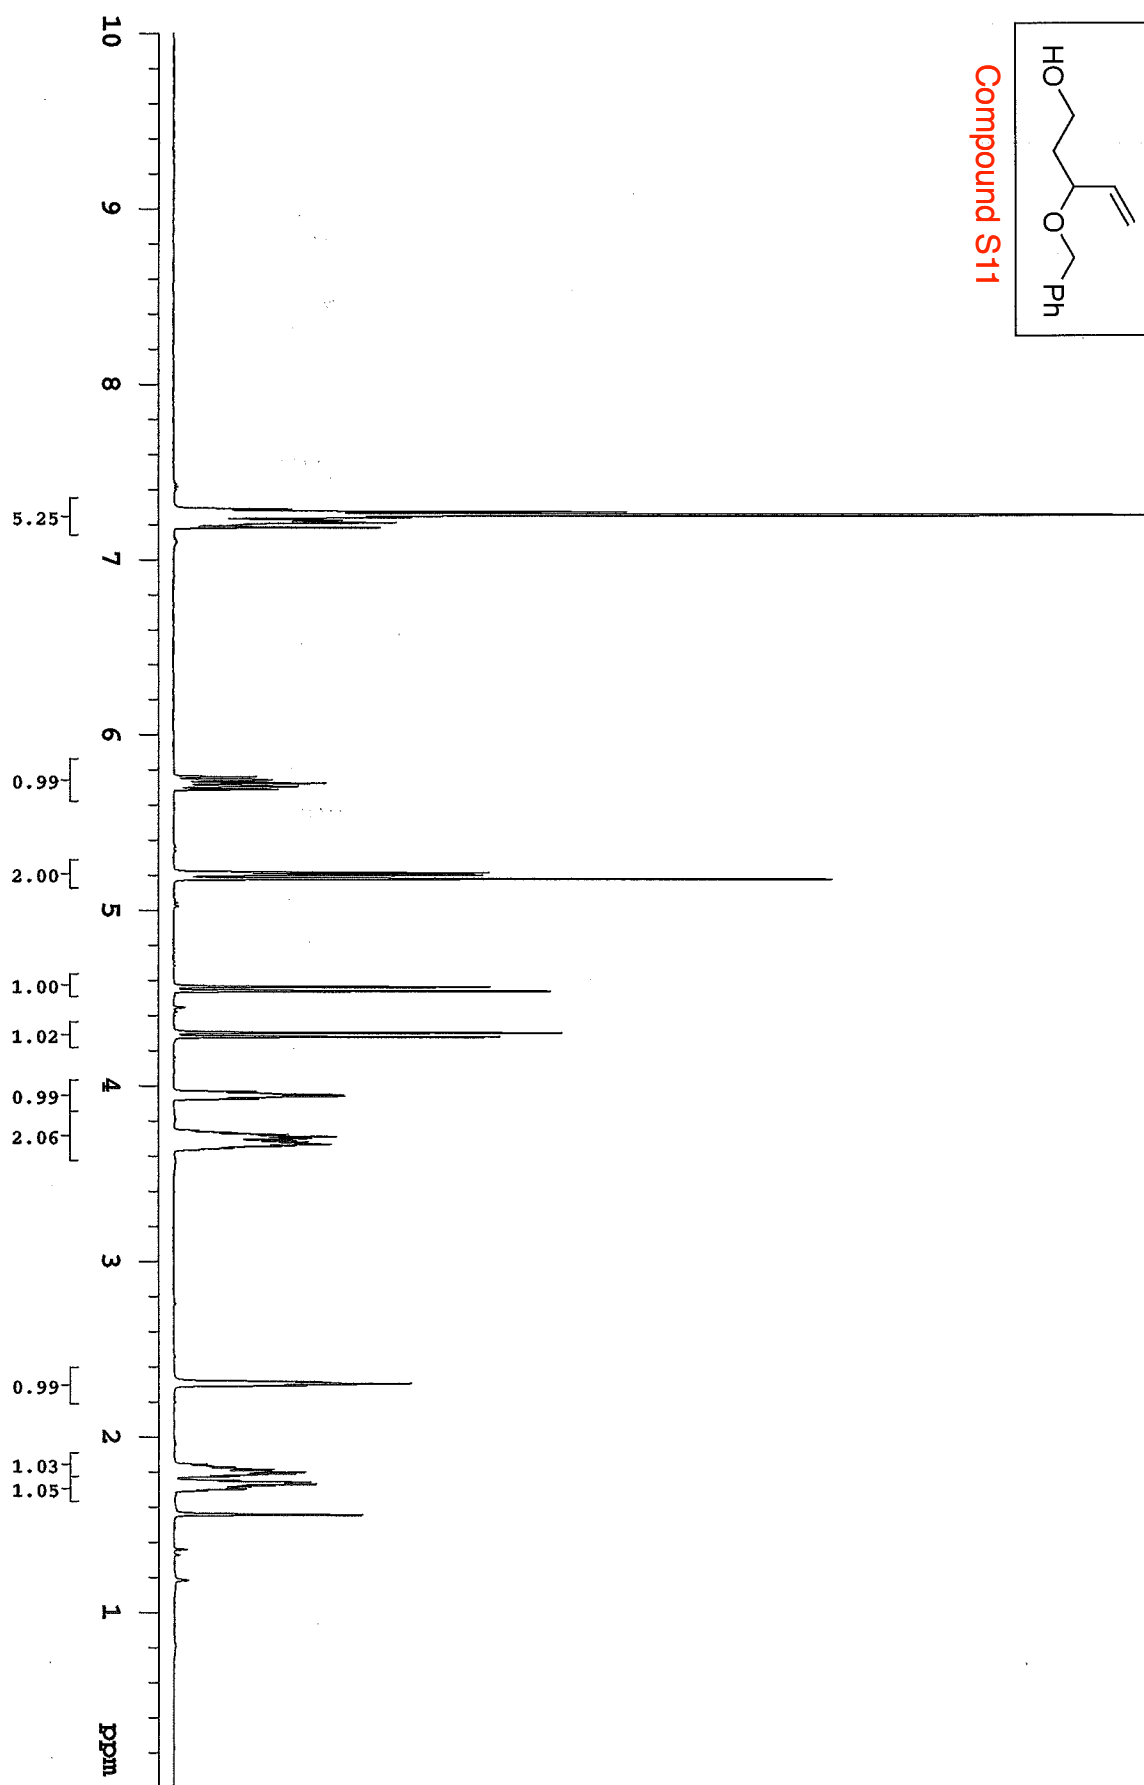



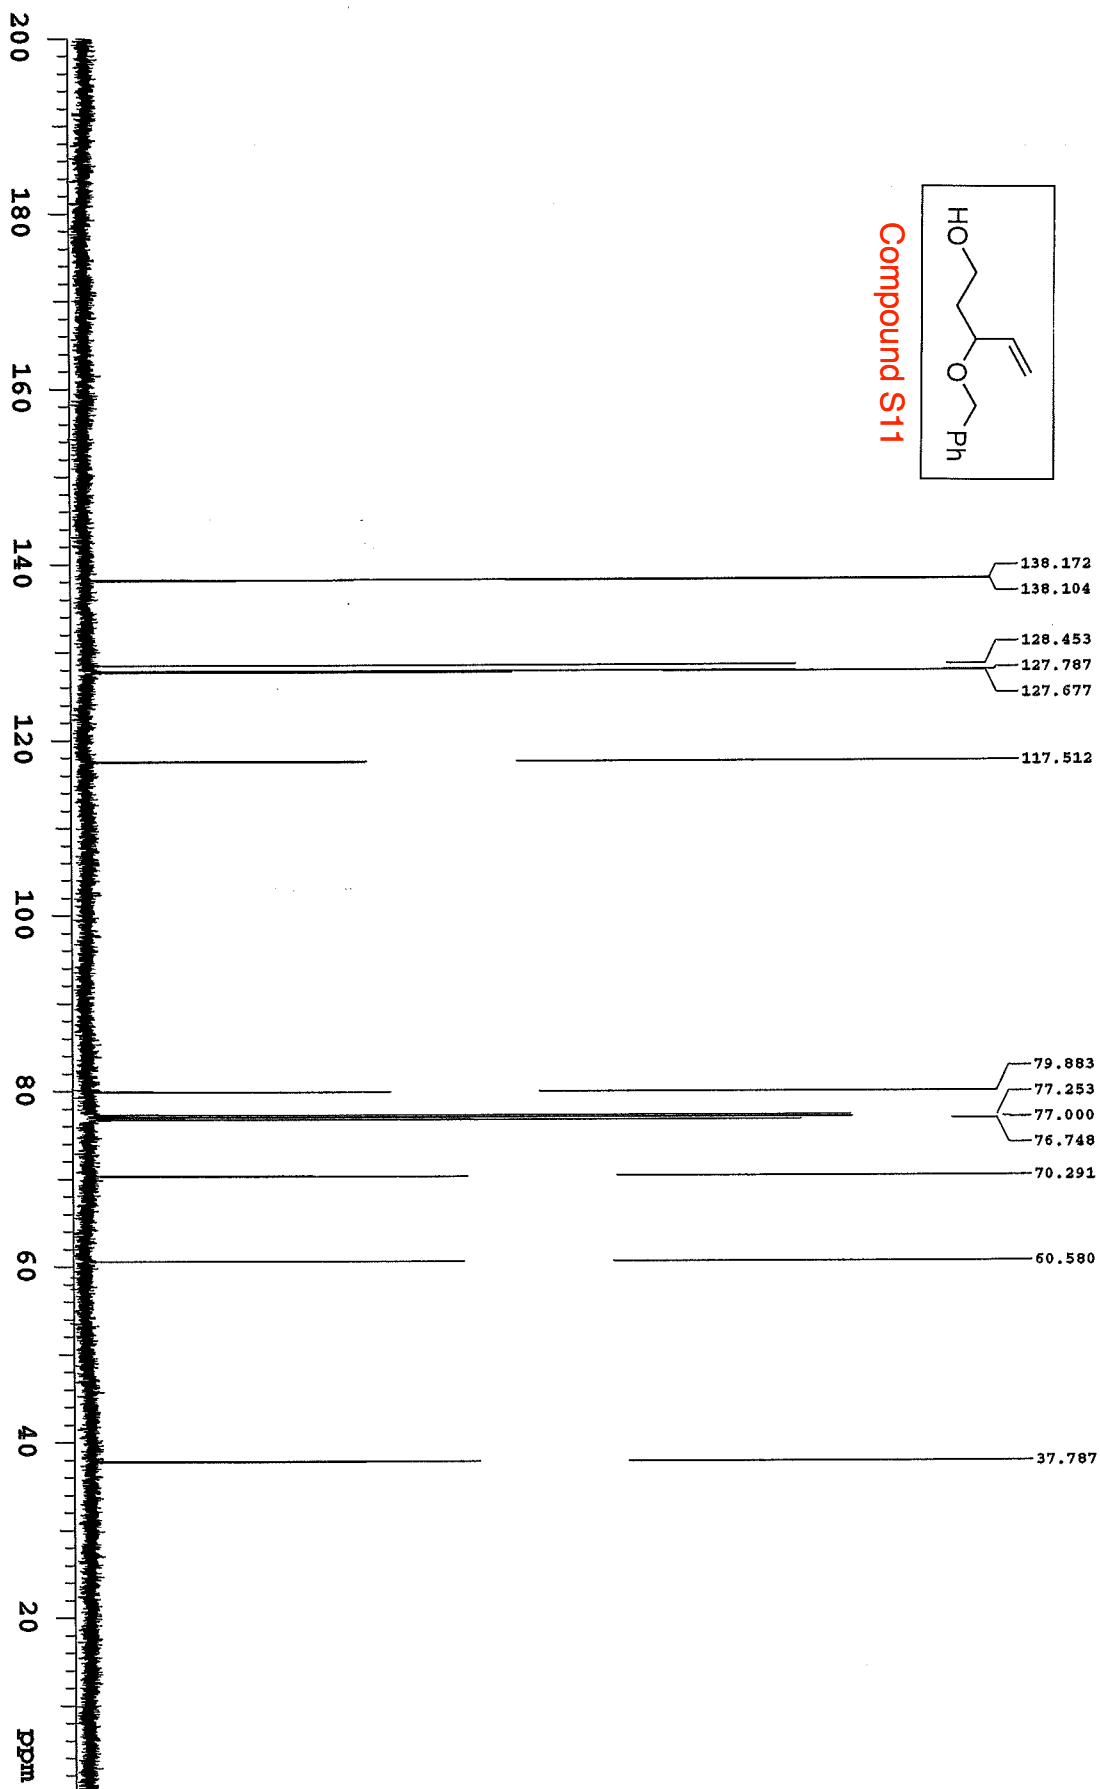

Compound S12

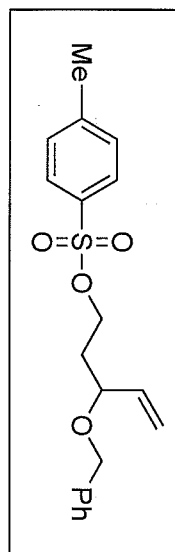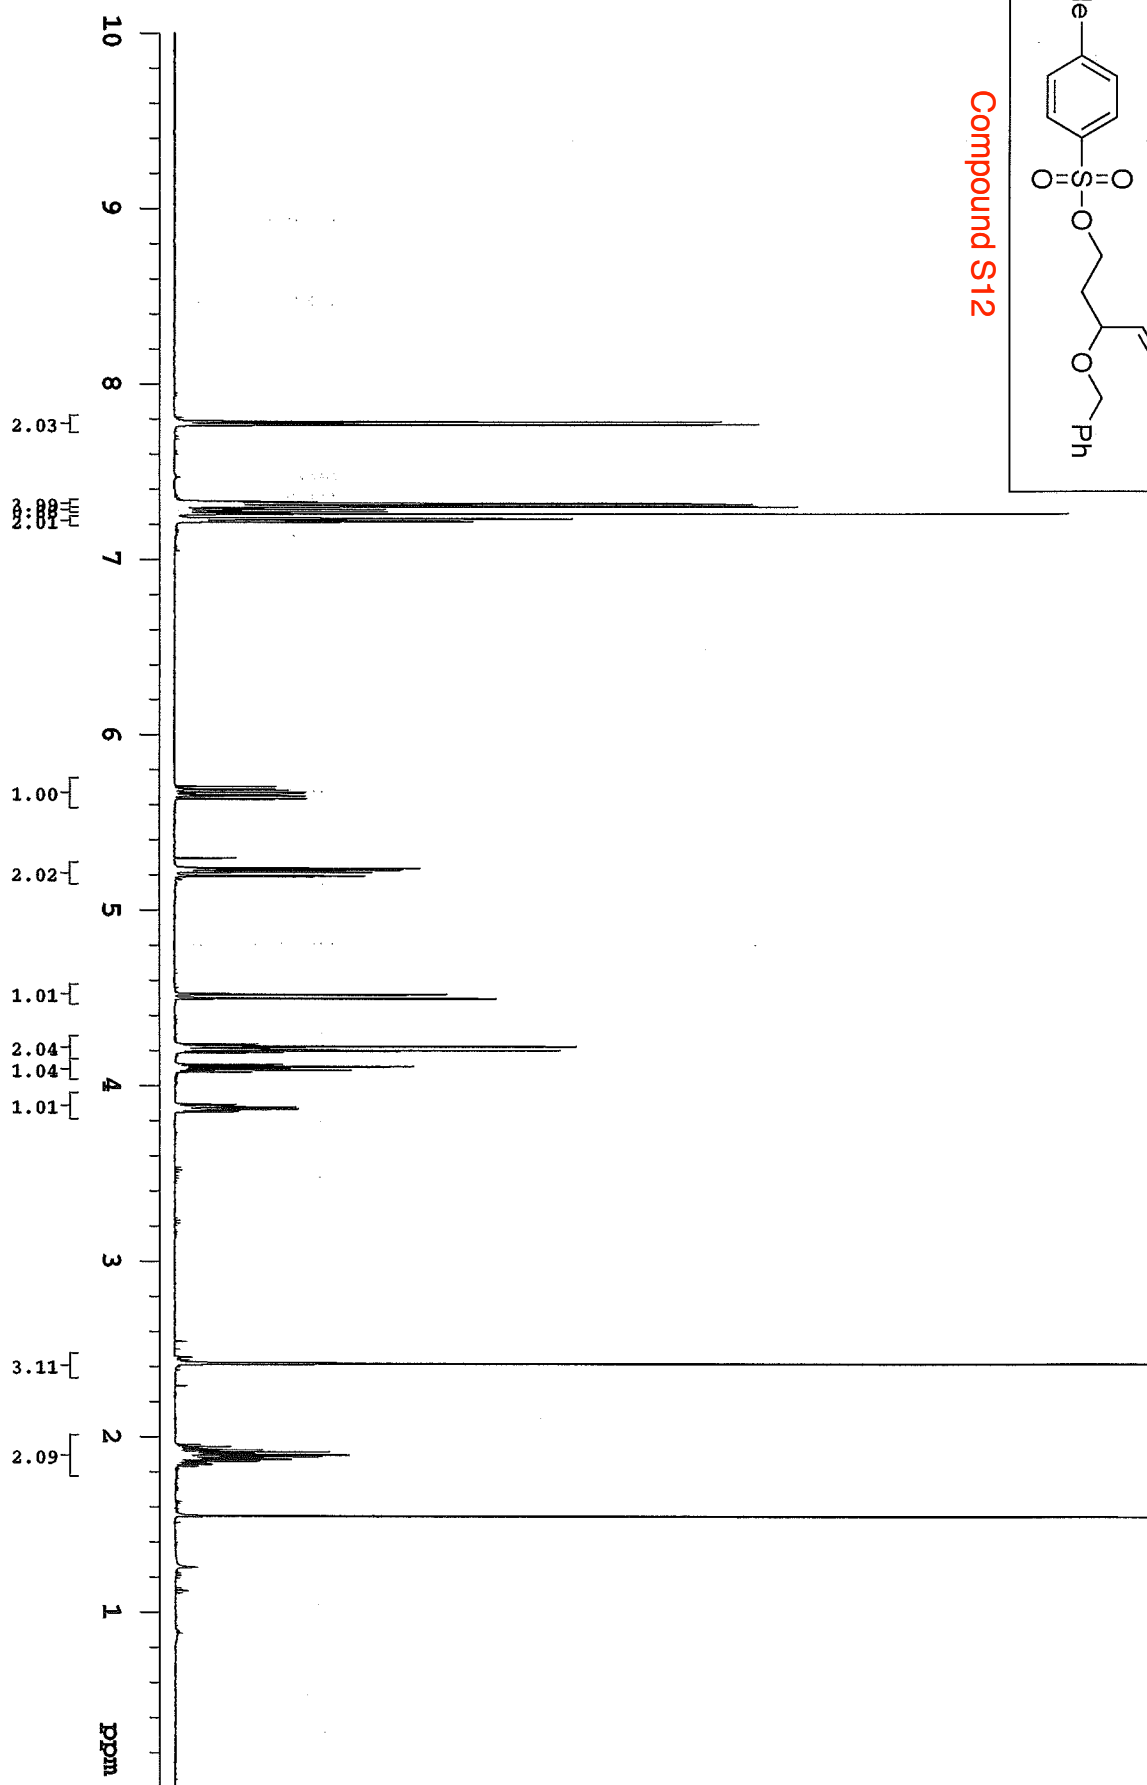

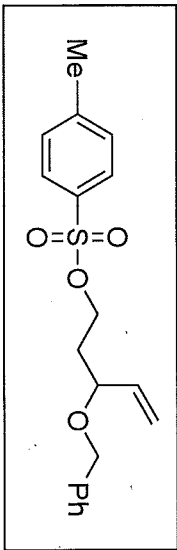

Compound S12

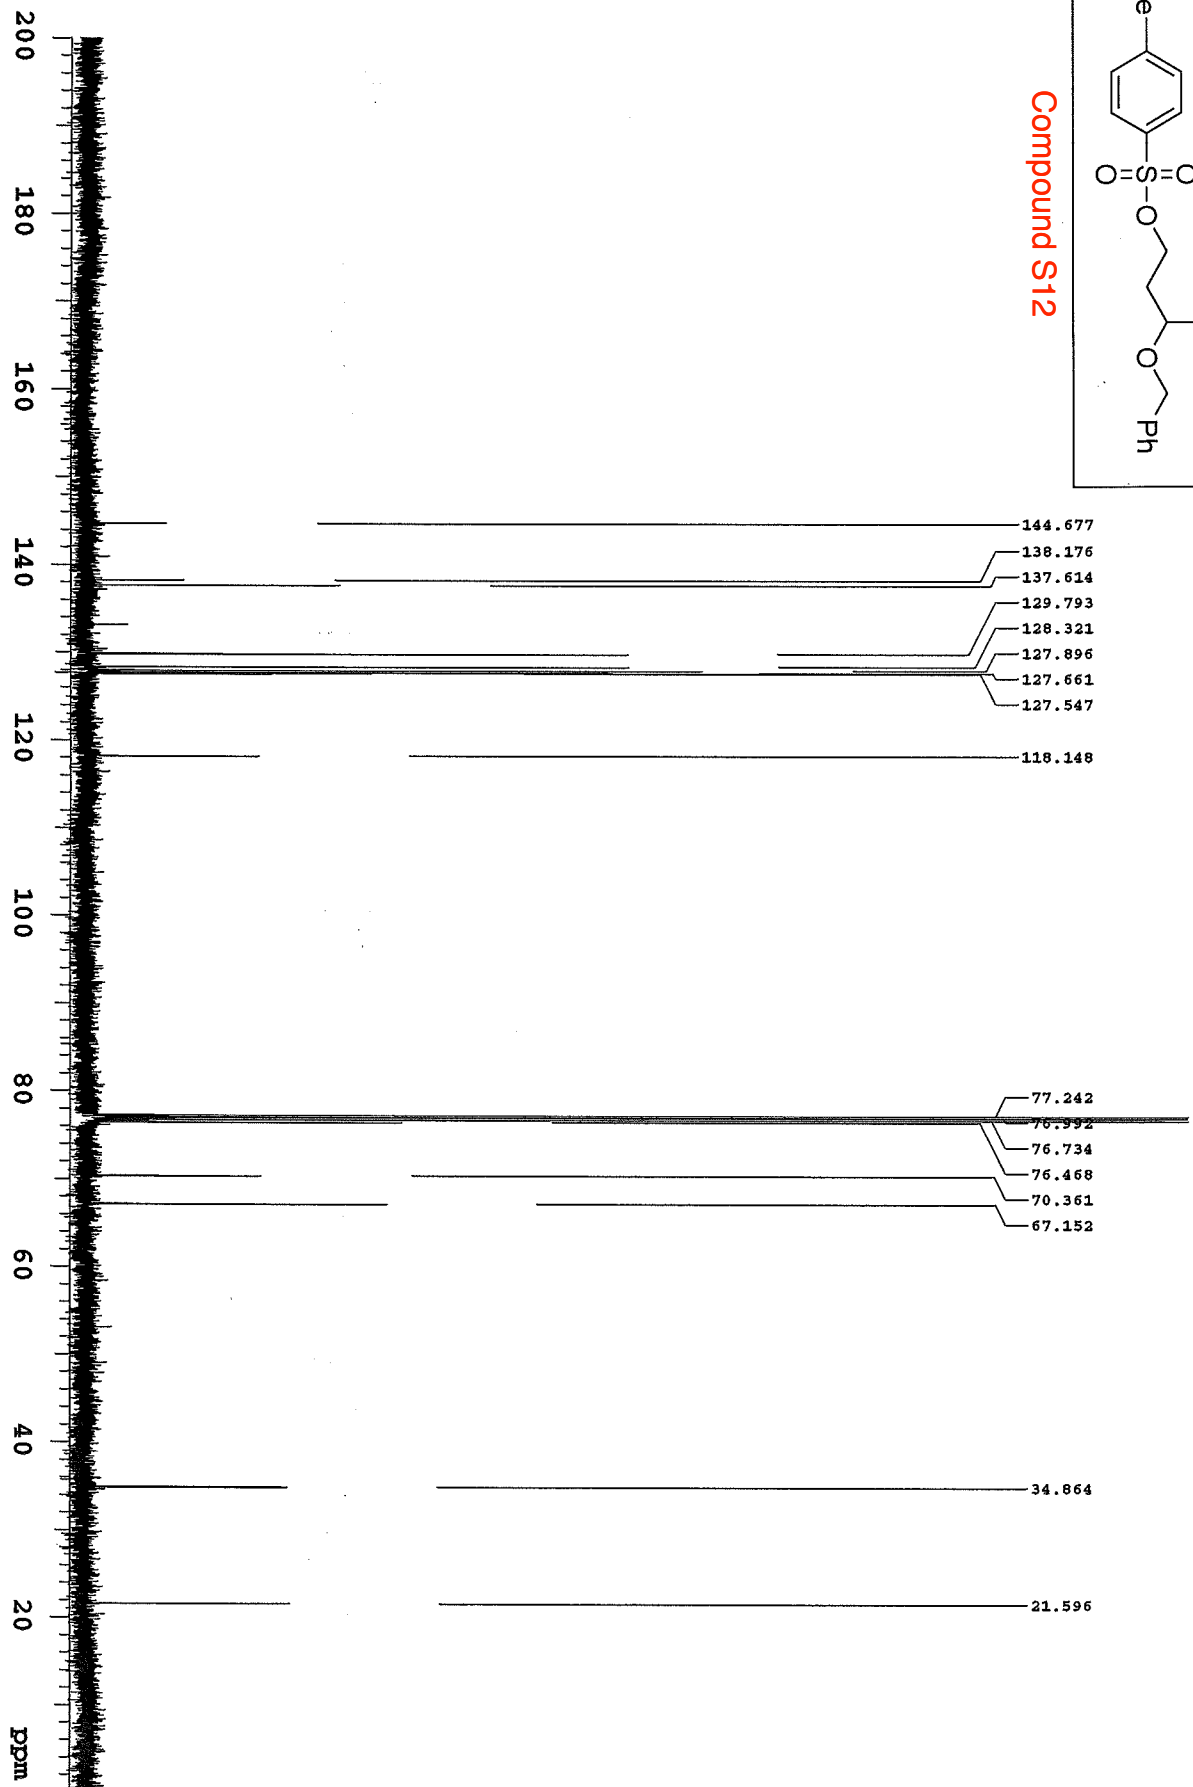

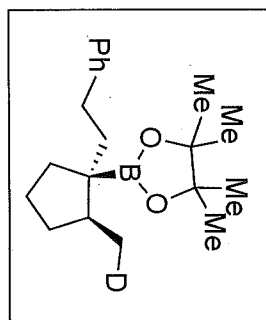

Compound 10

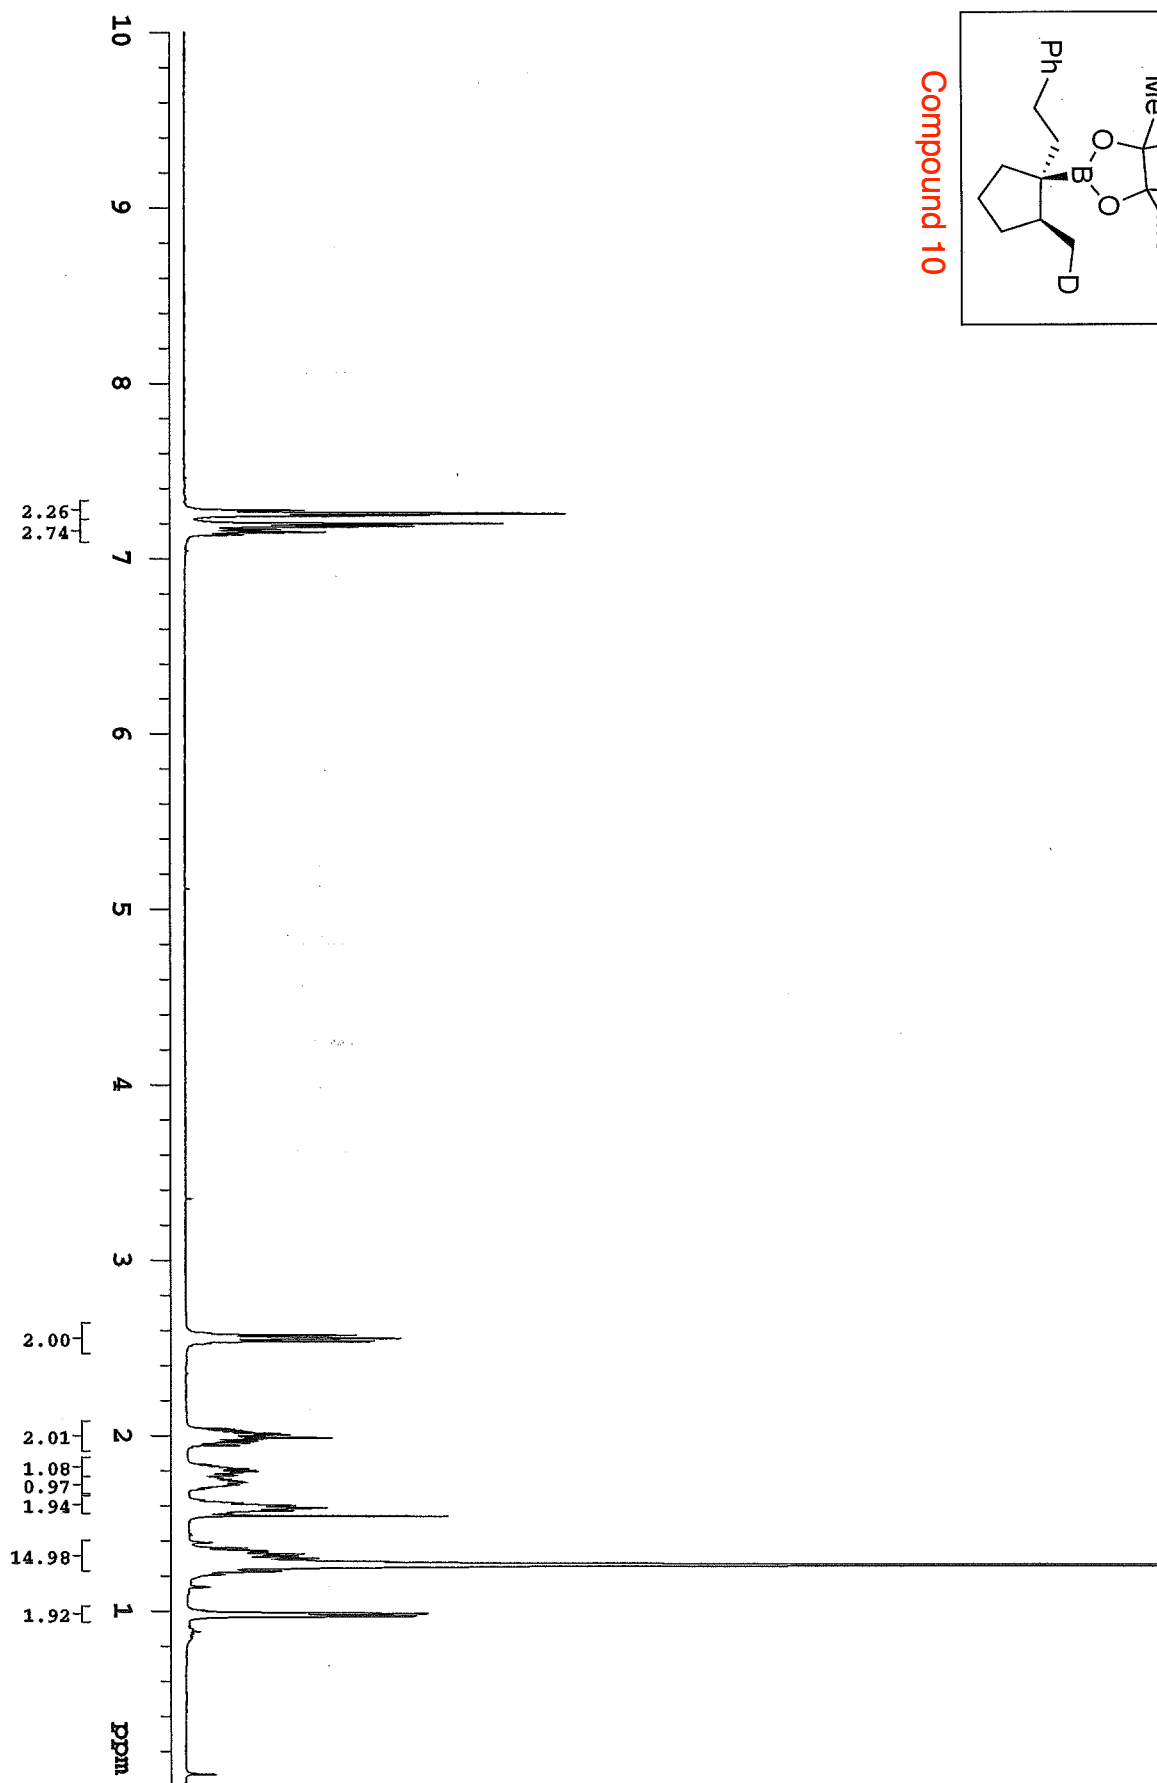

Compound 10

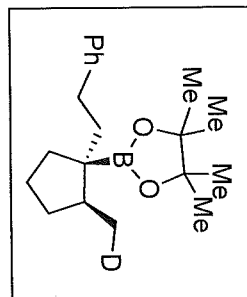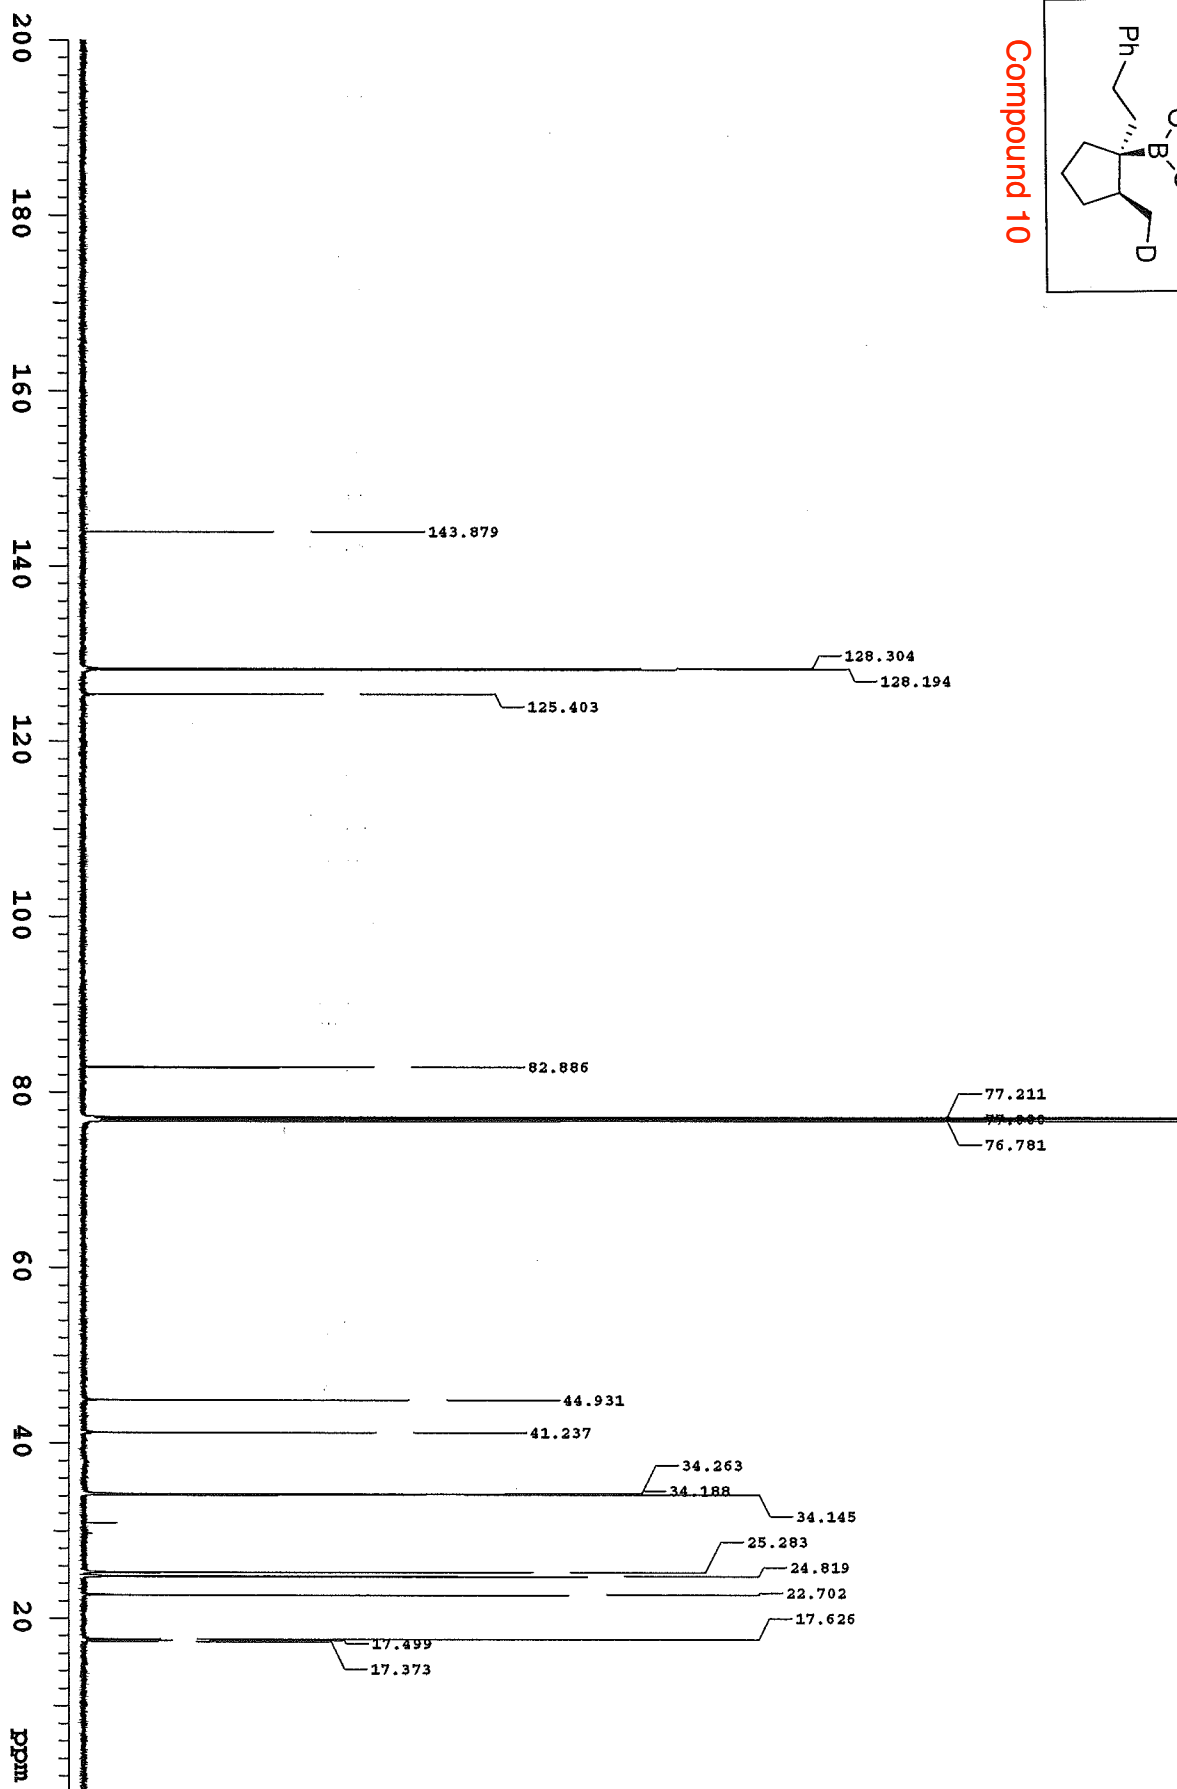

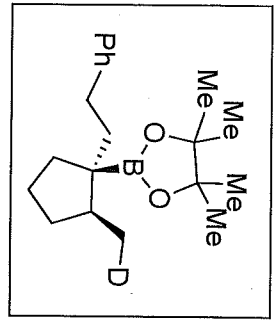

Compound 10

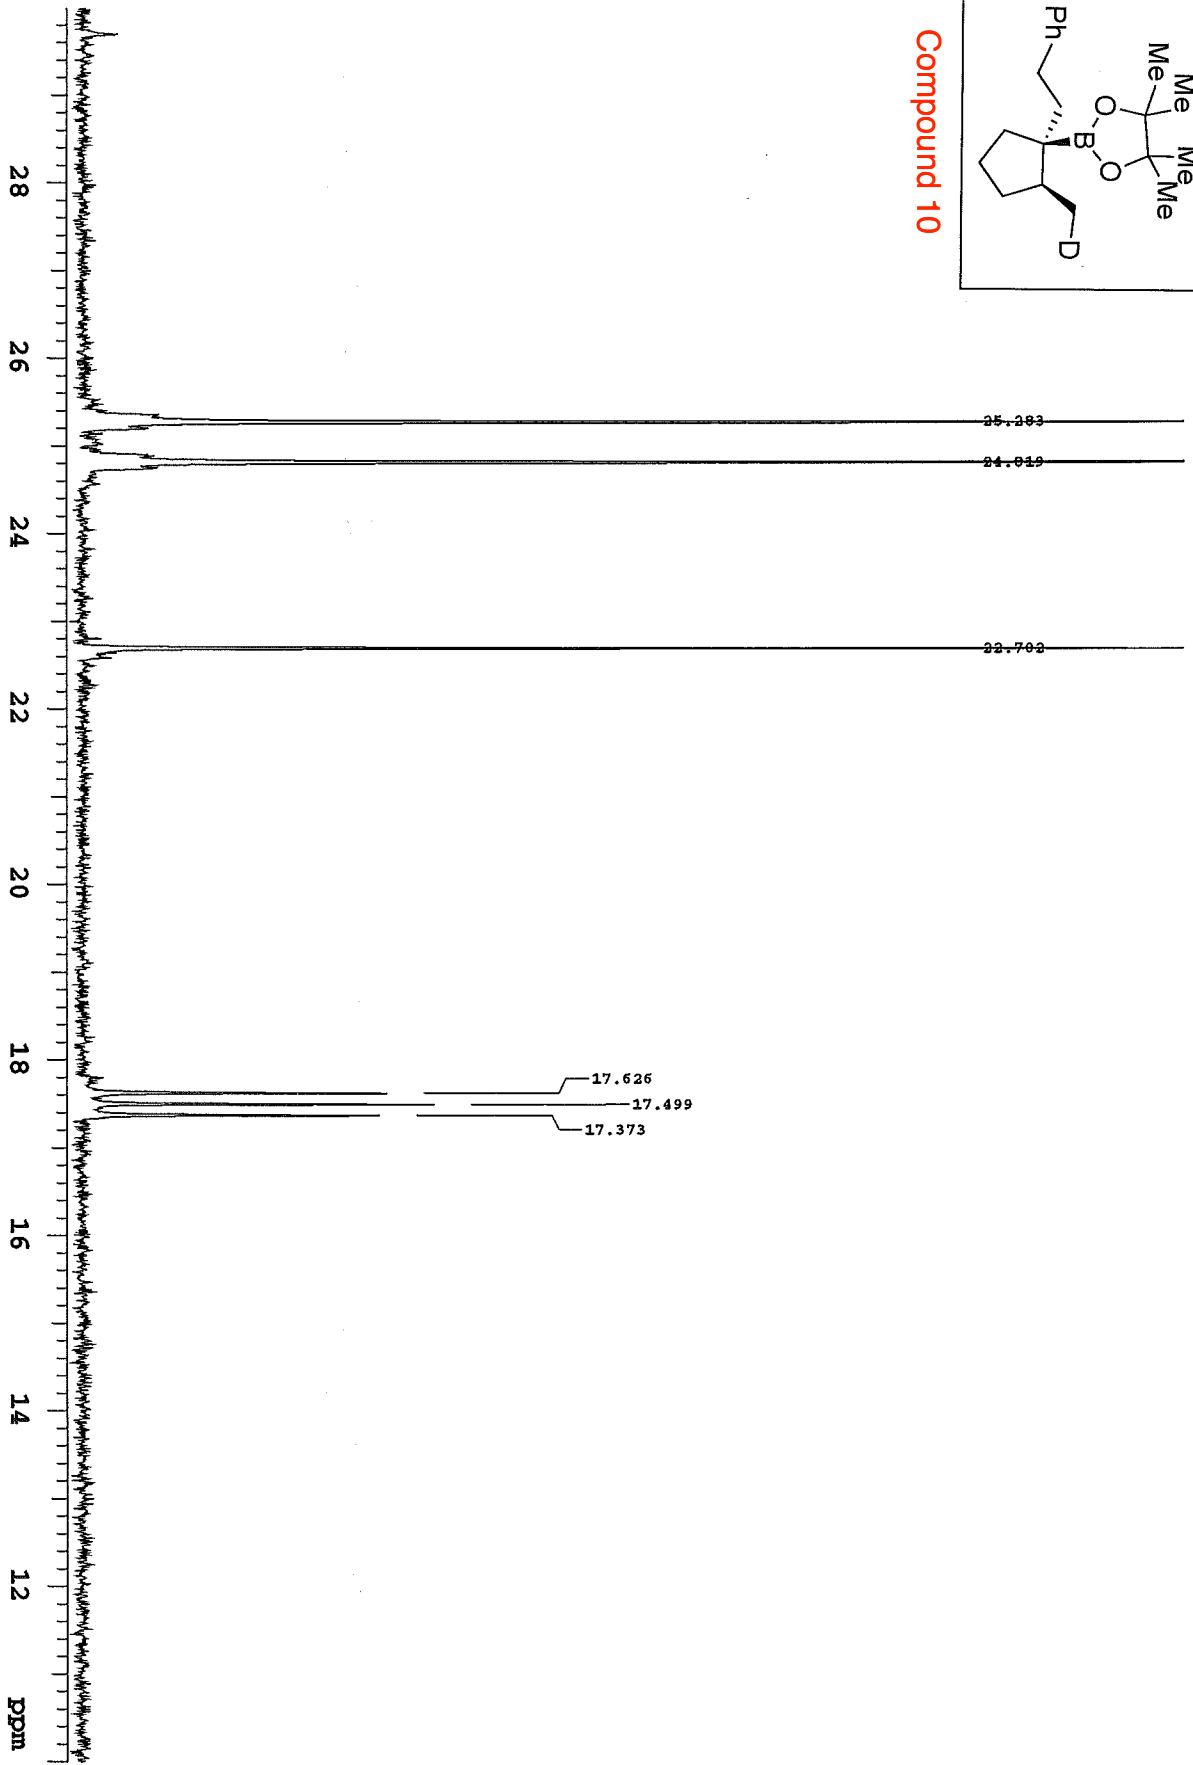

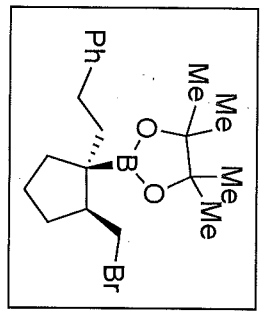

Compound 11

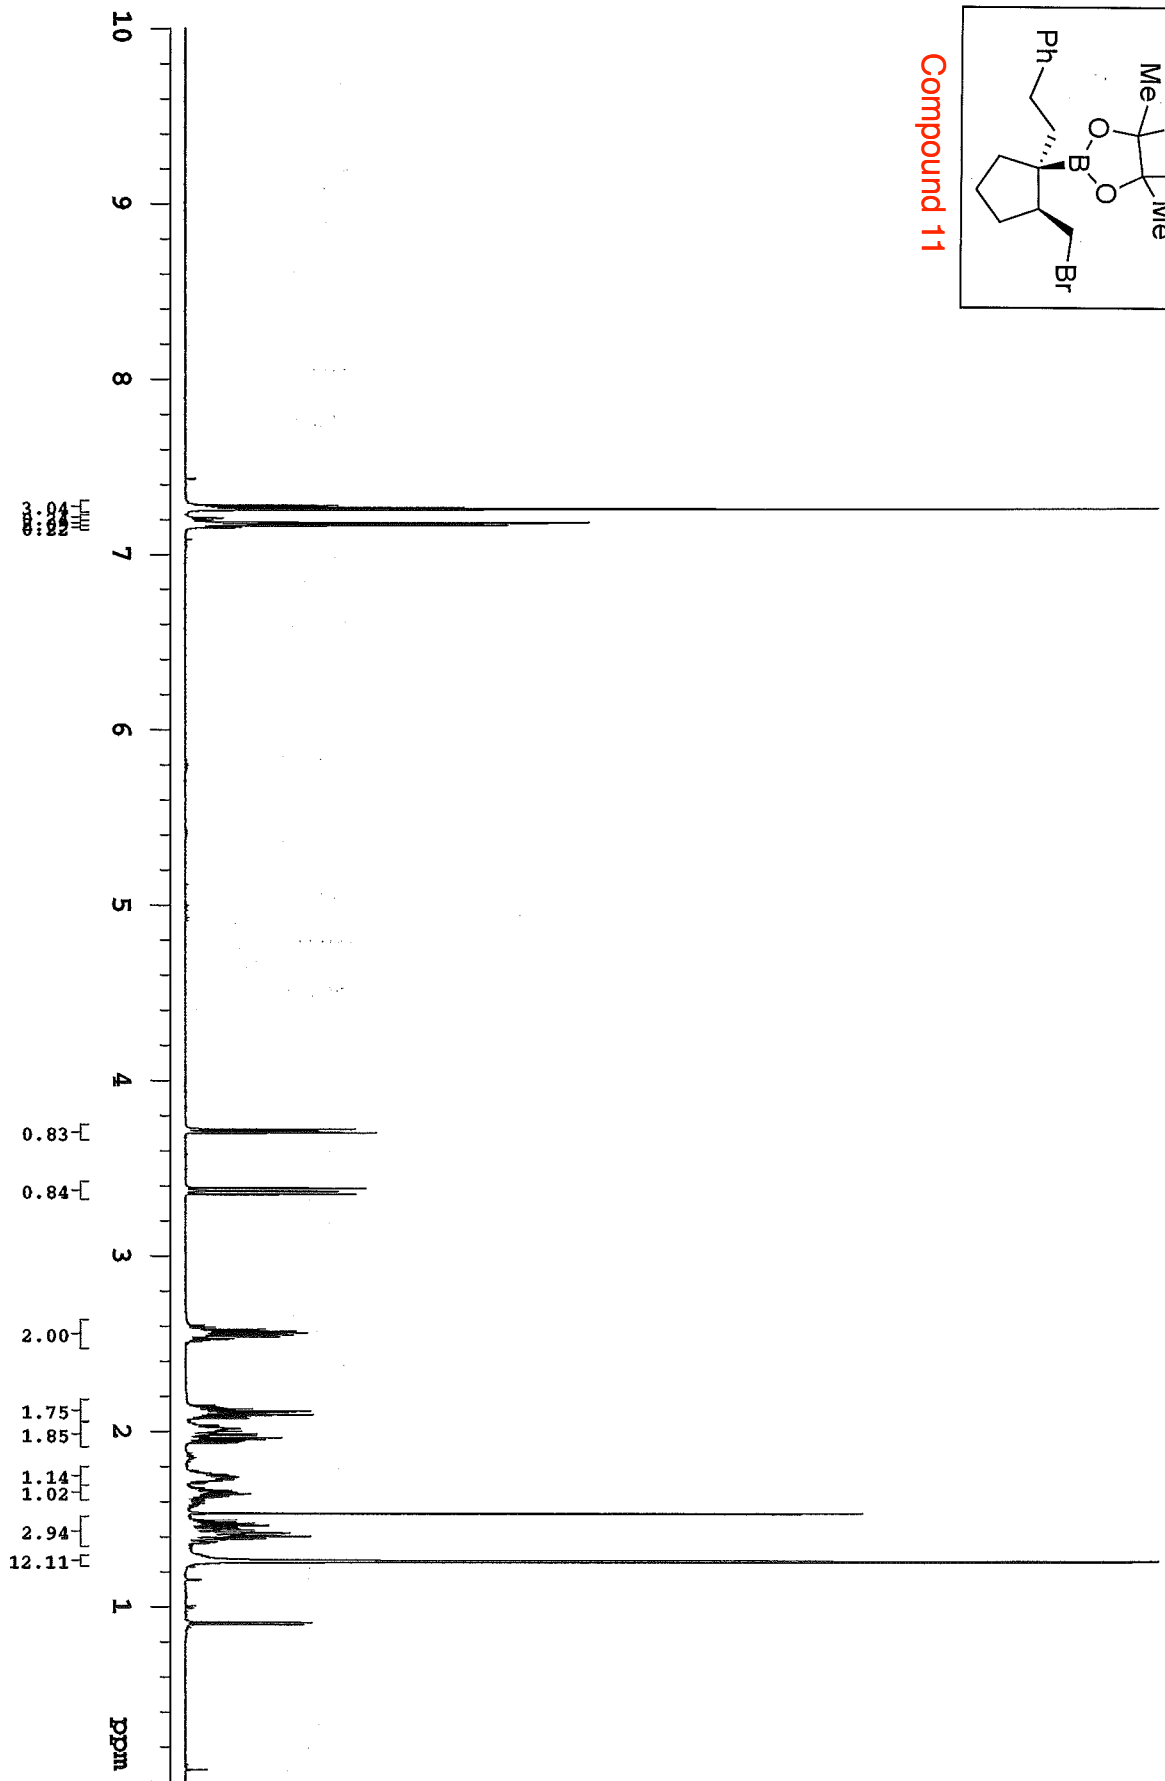

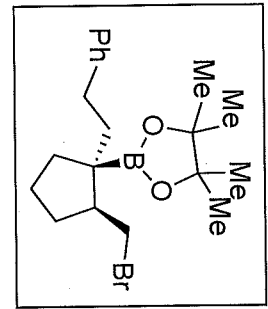

Compound 11

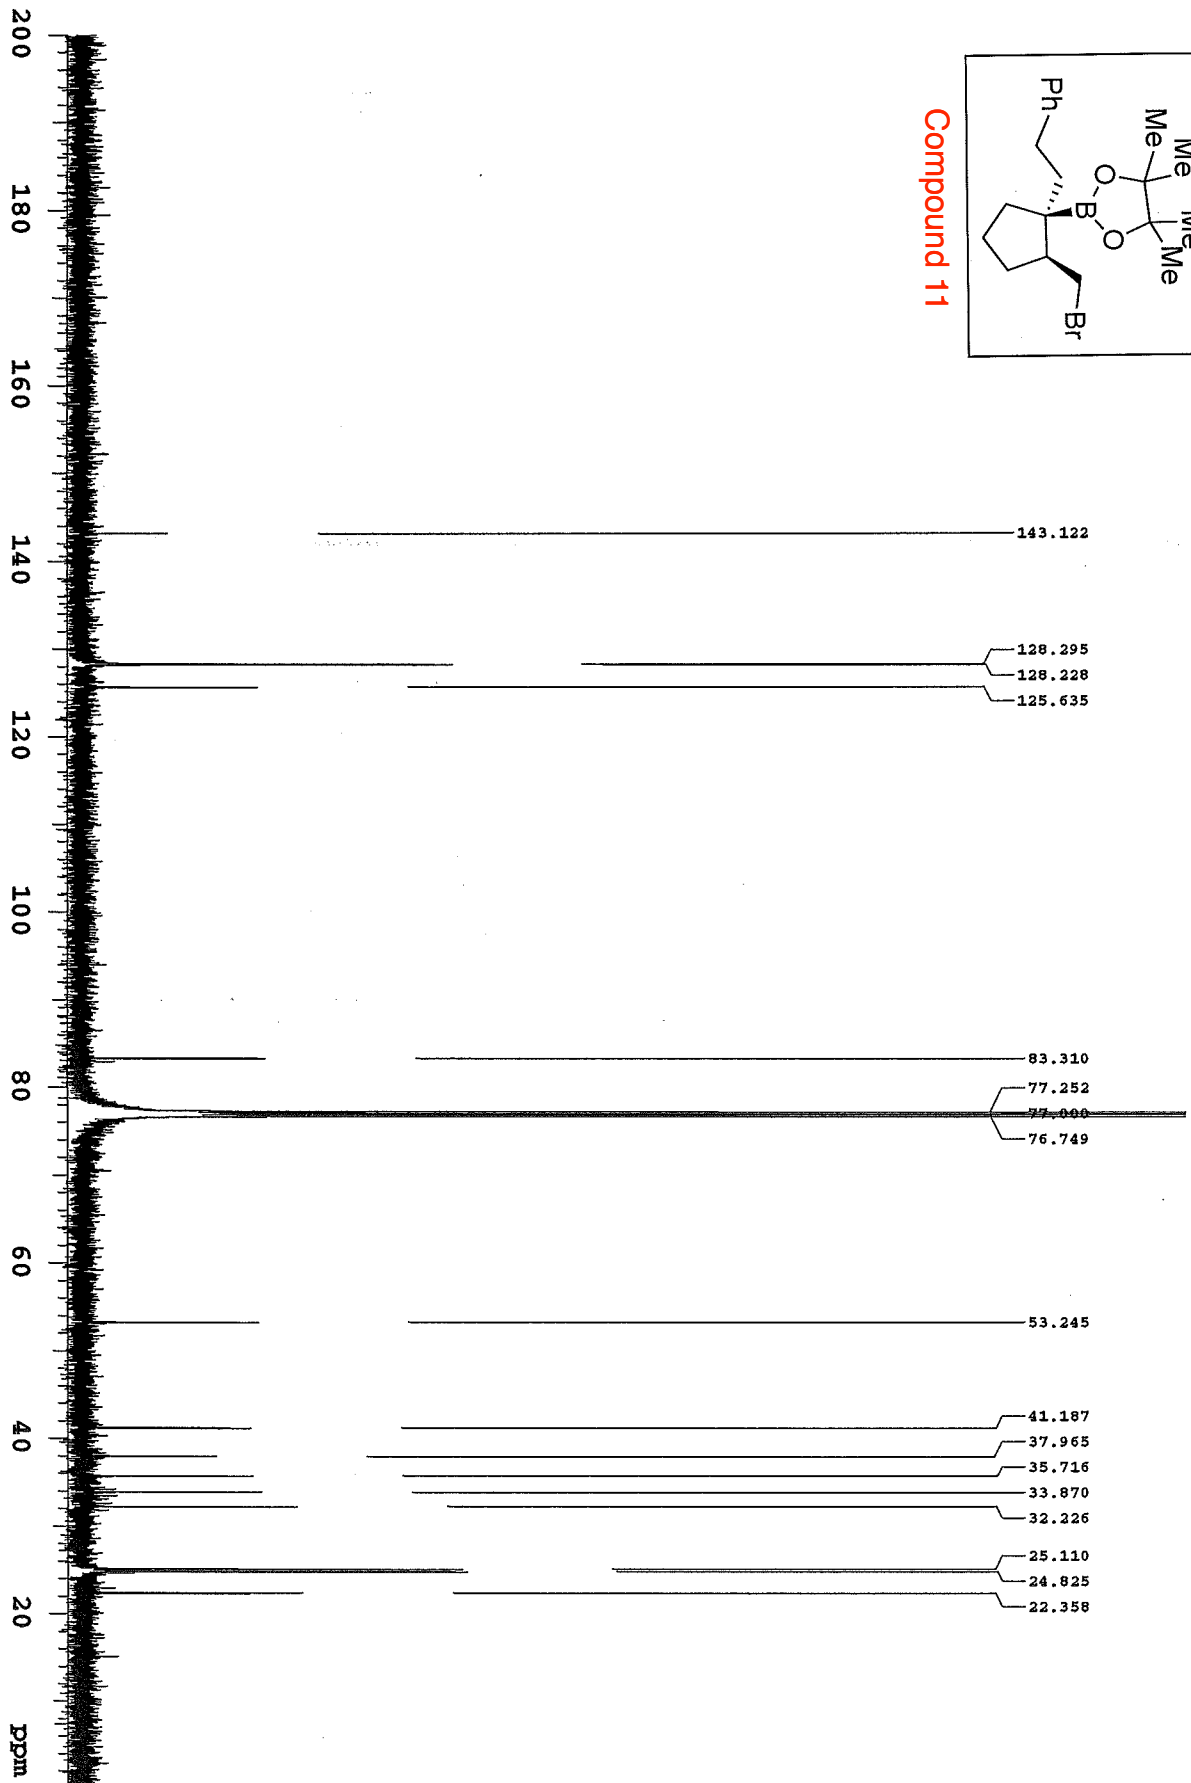



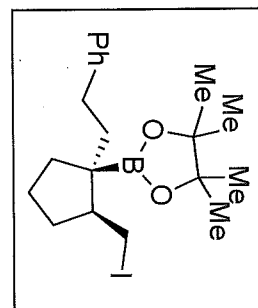

Compound 12

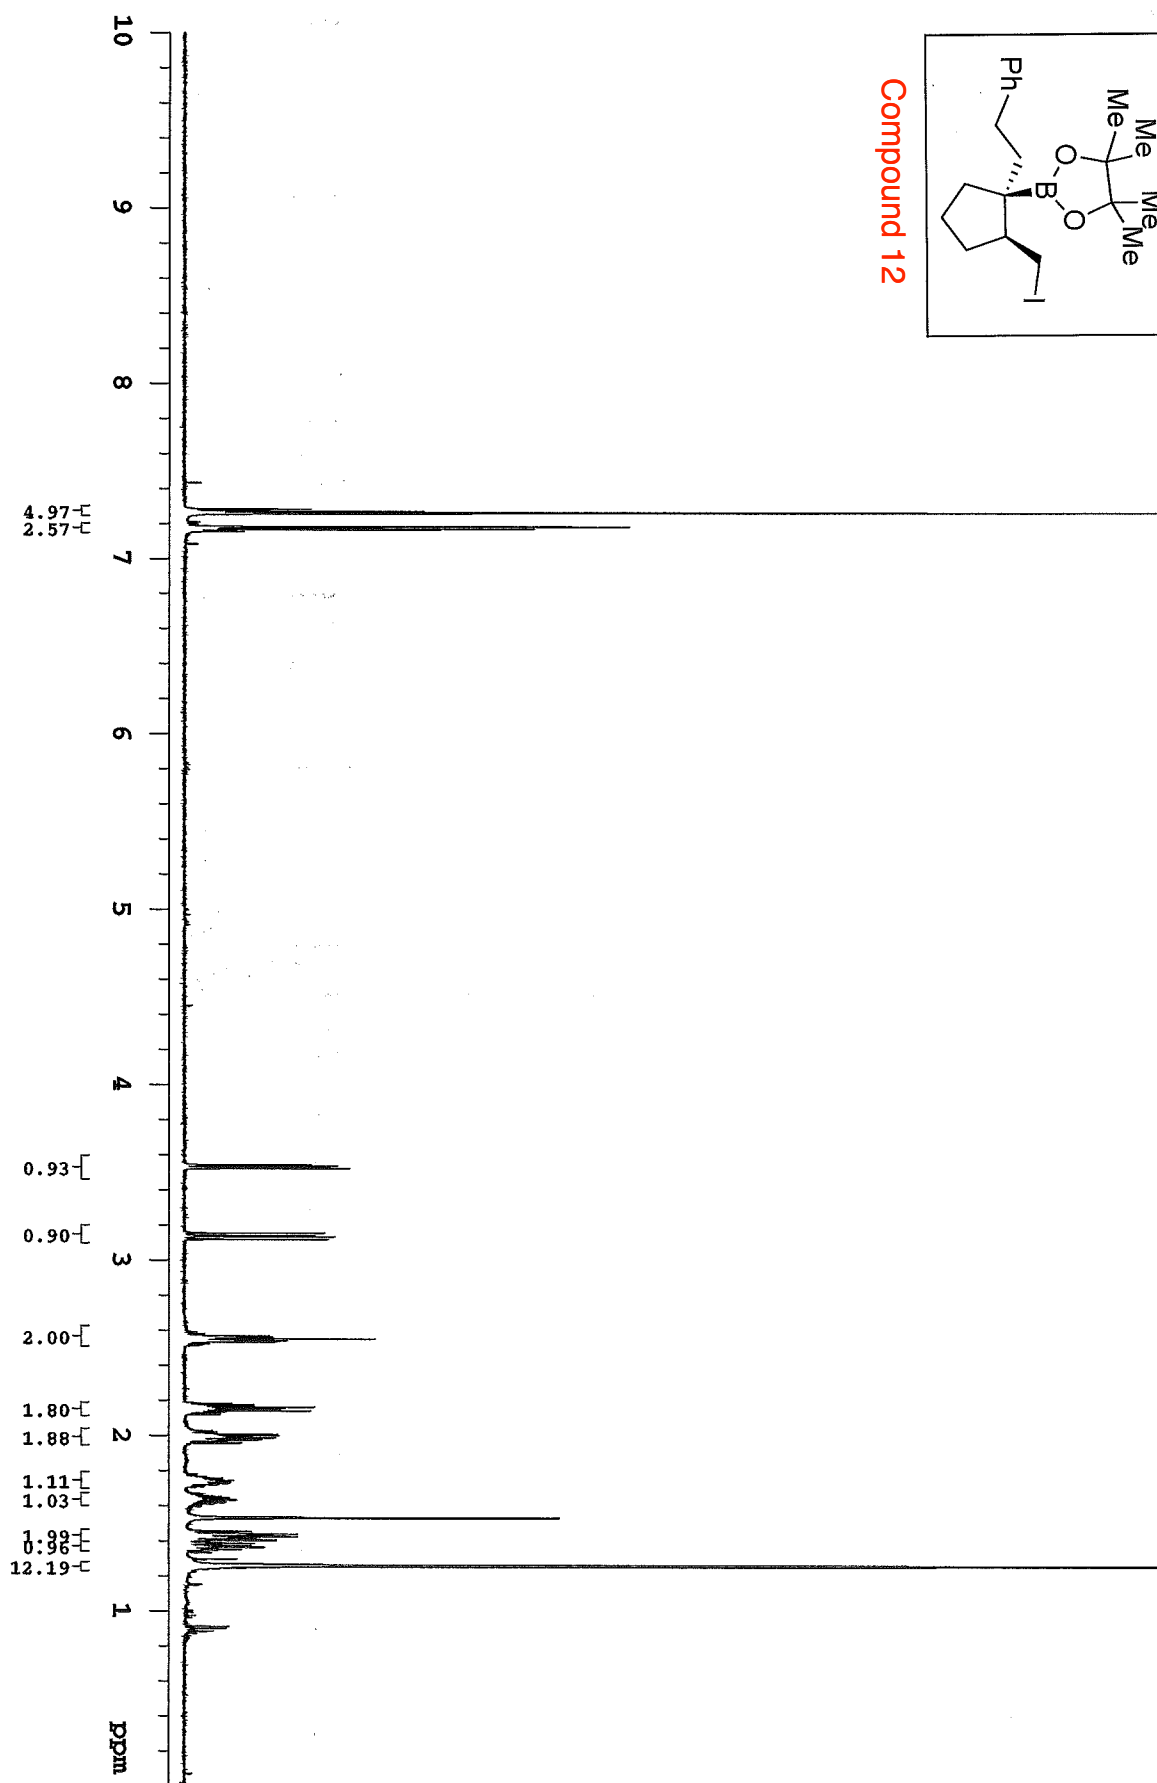

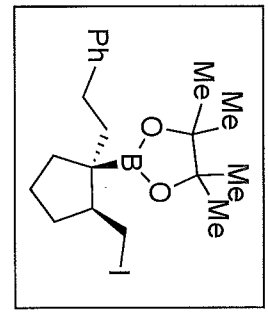

Compound  
12

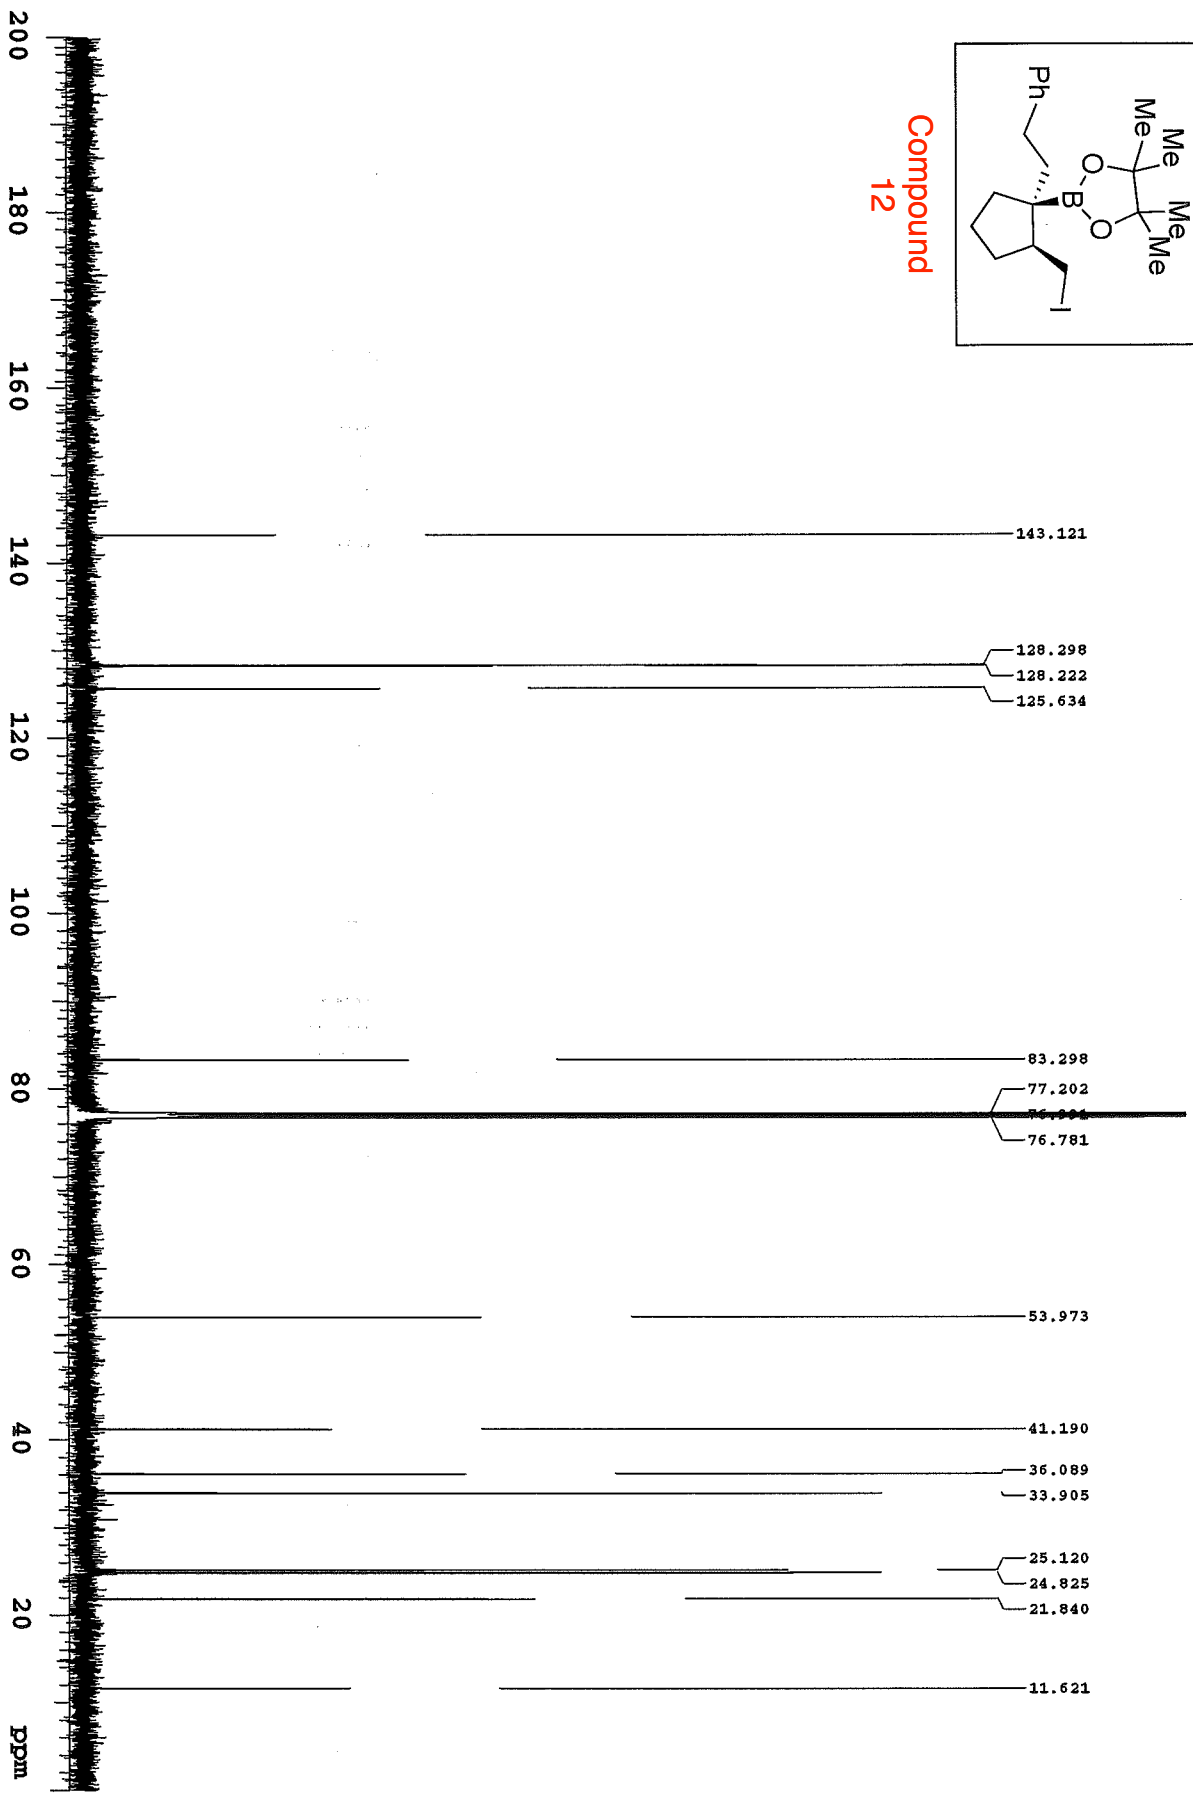

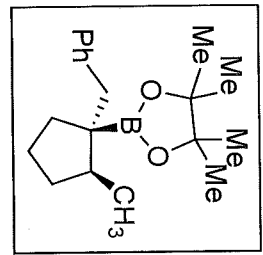

Compound 13

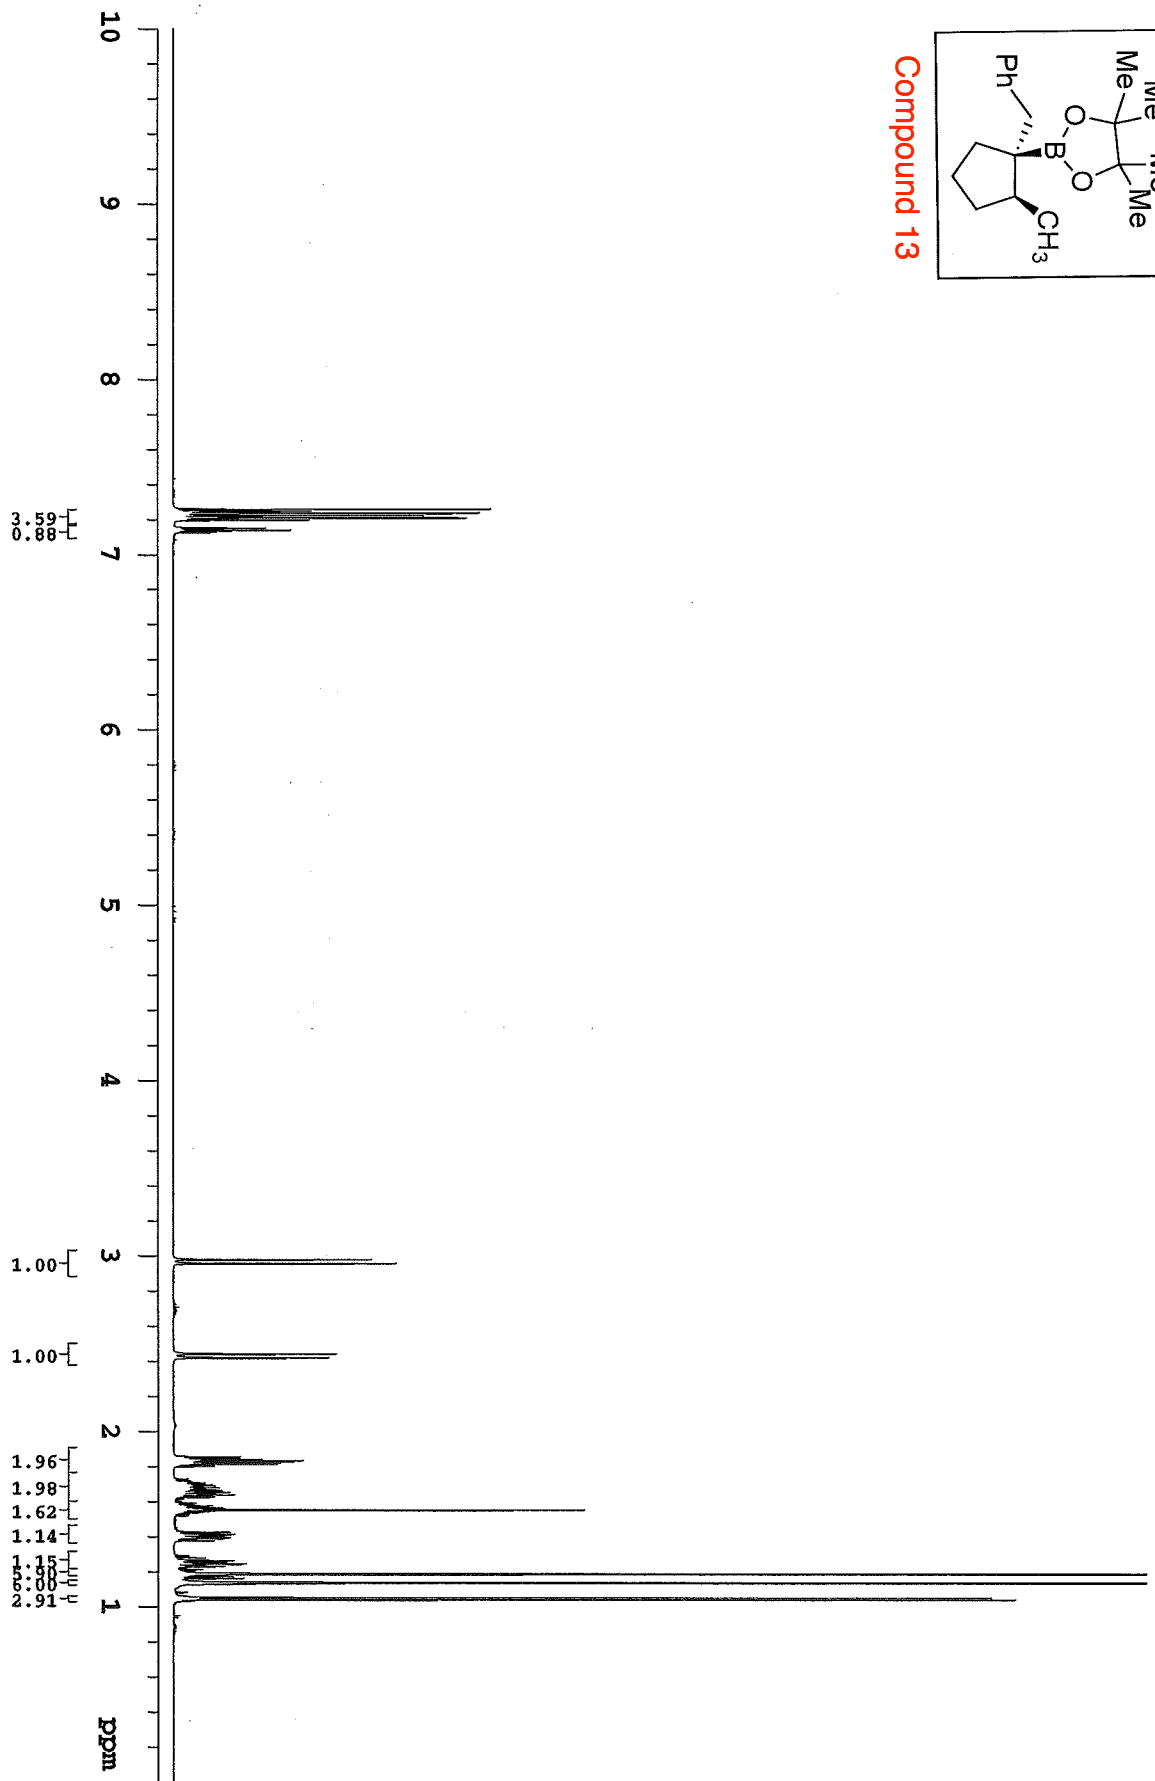

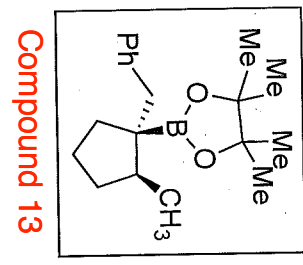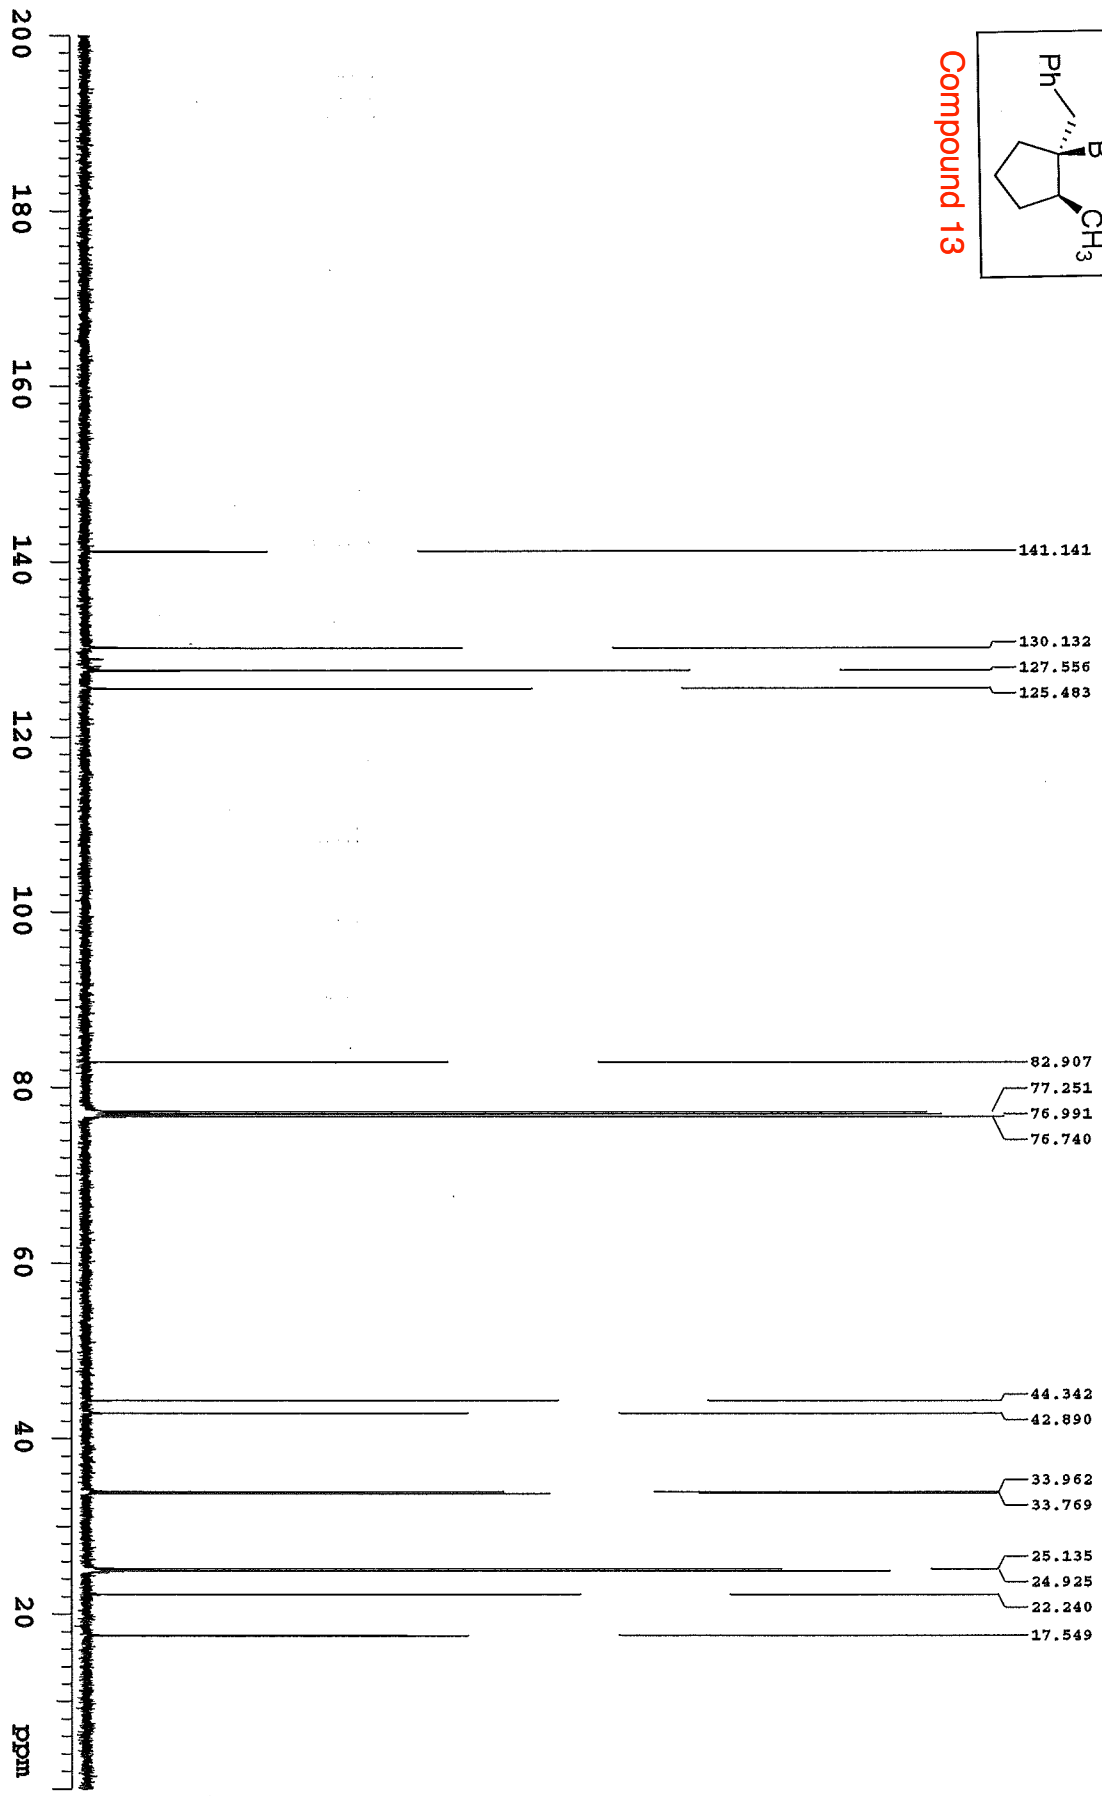

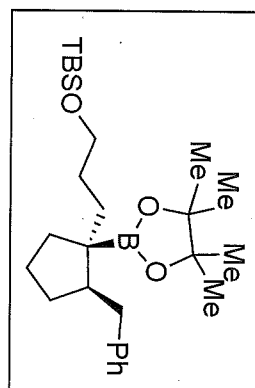

Compound 18

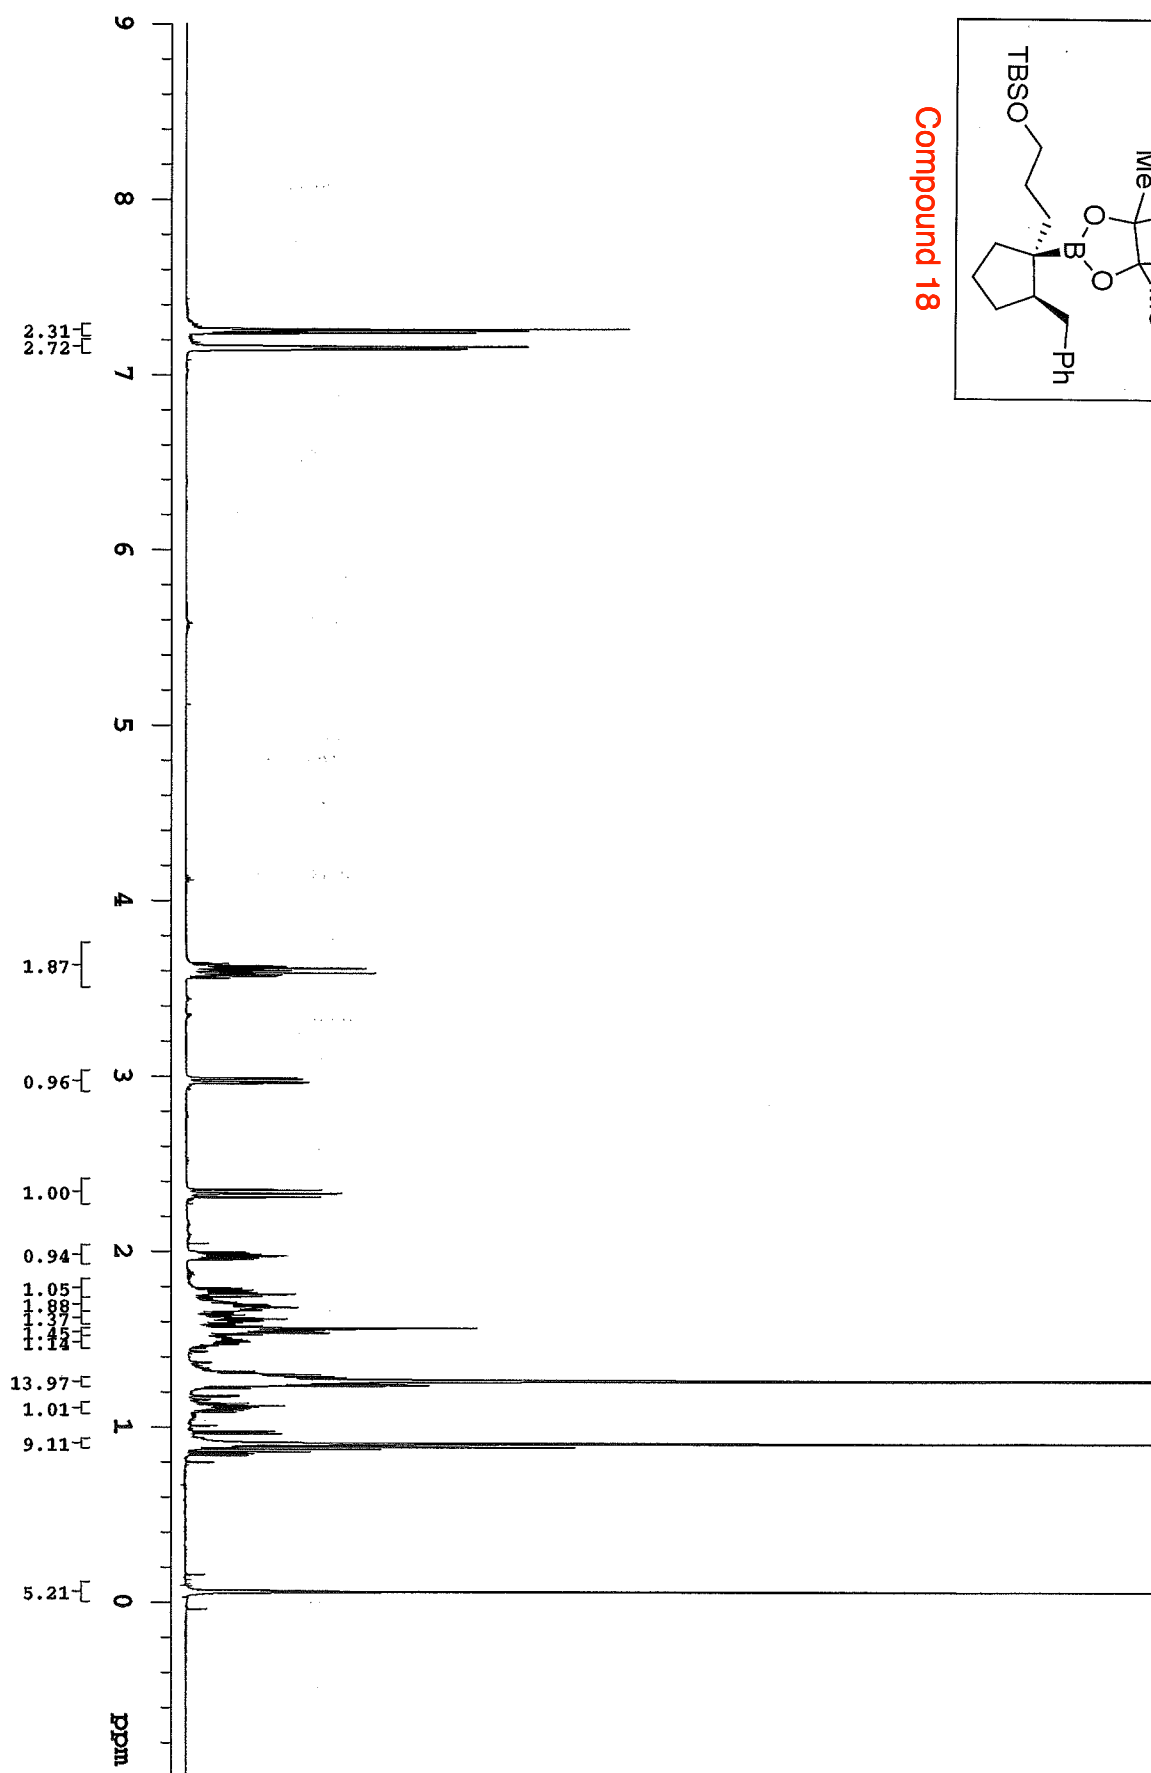

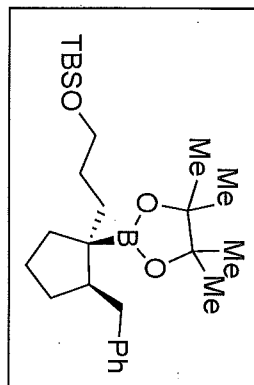

Compound 18

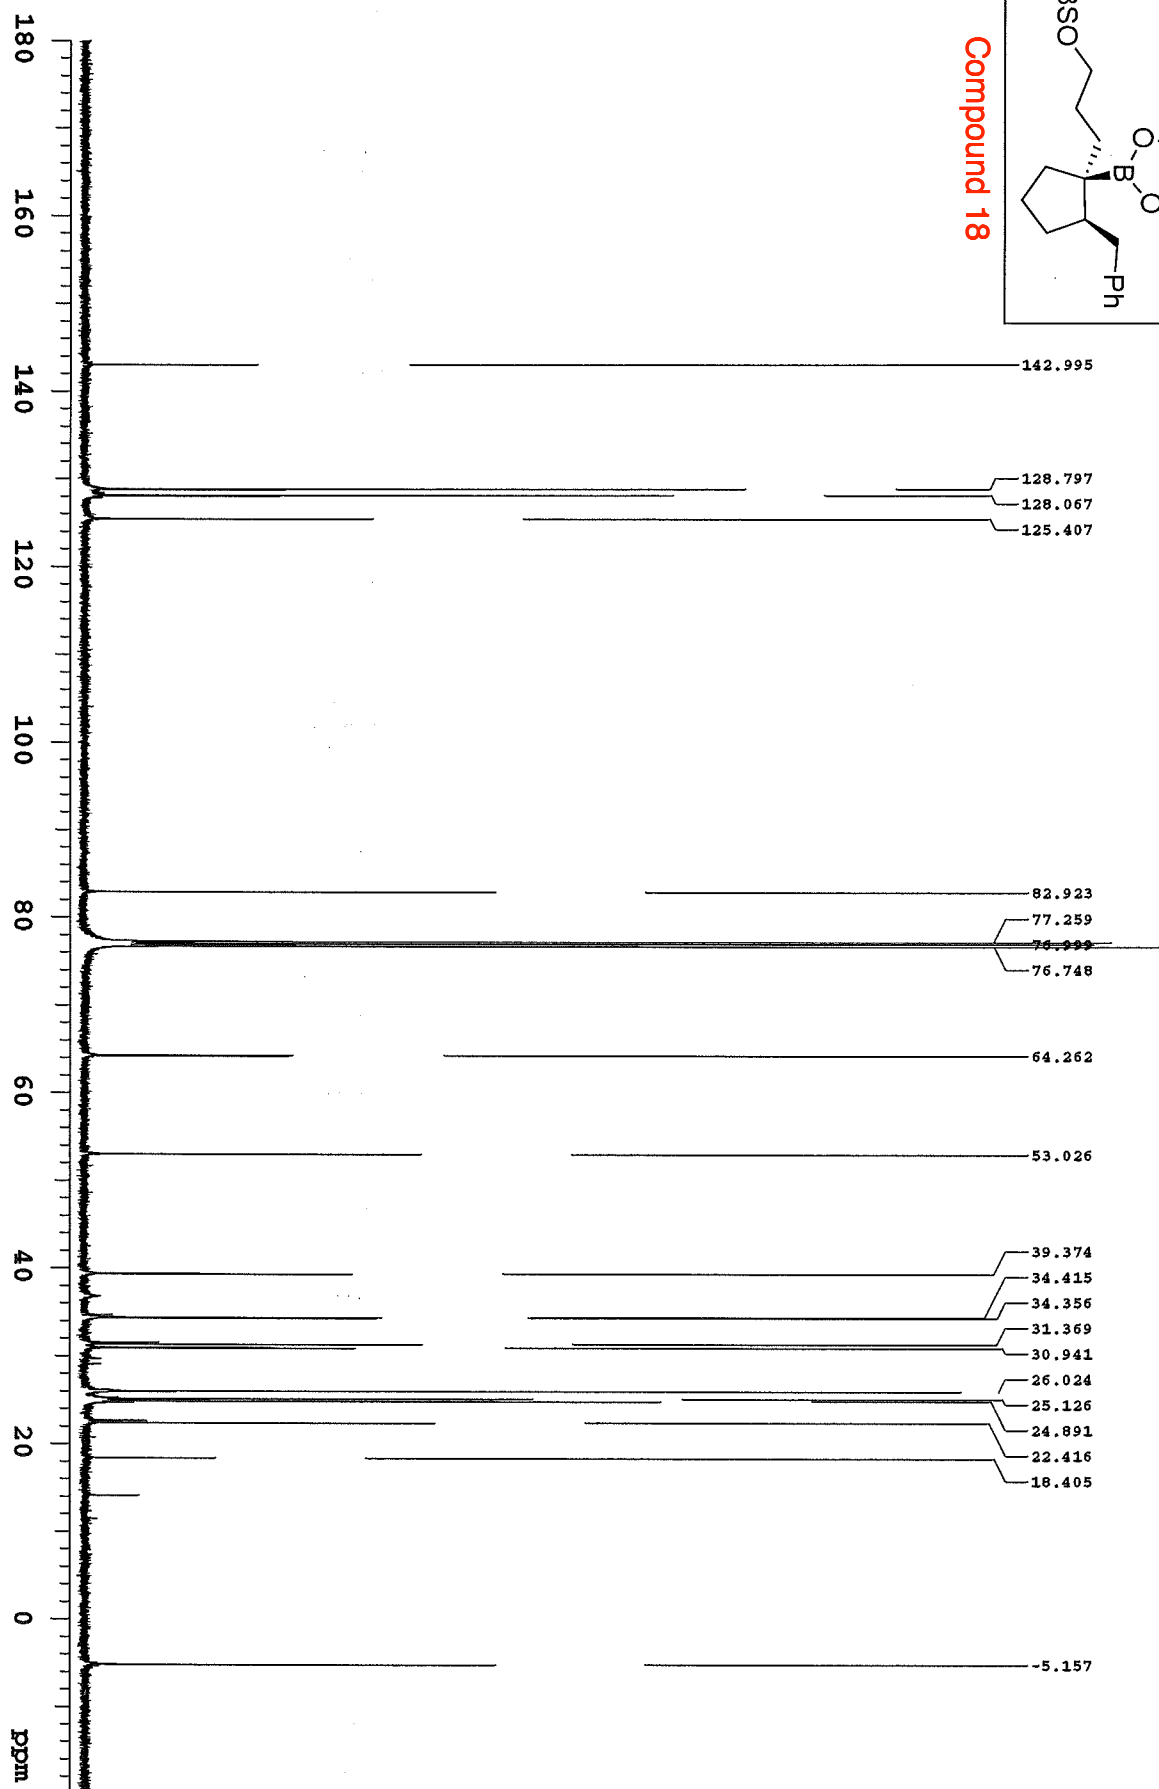

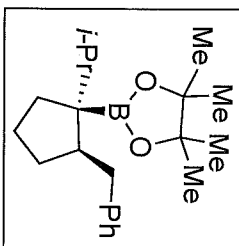

Compound 19

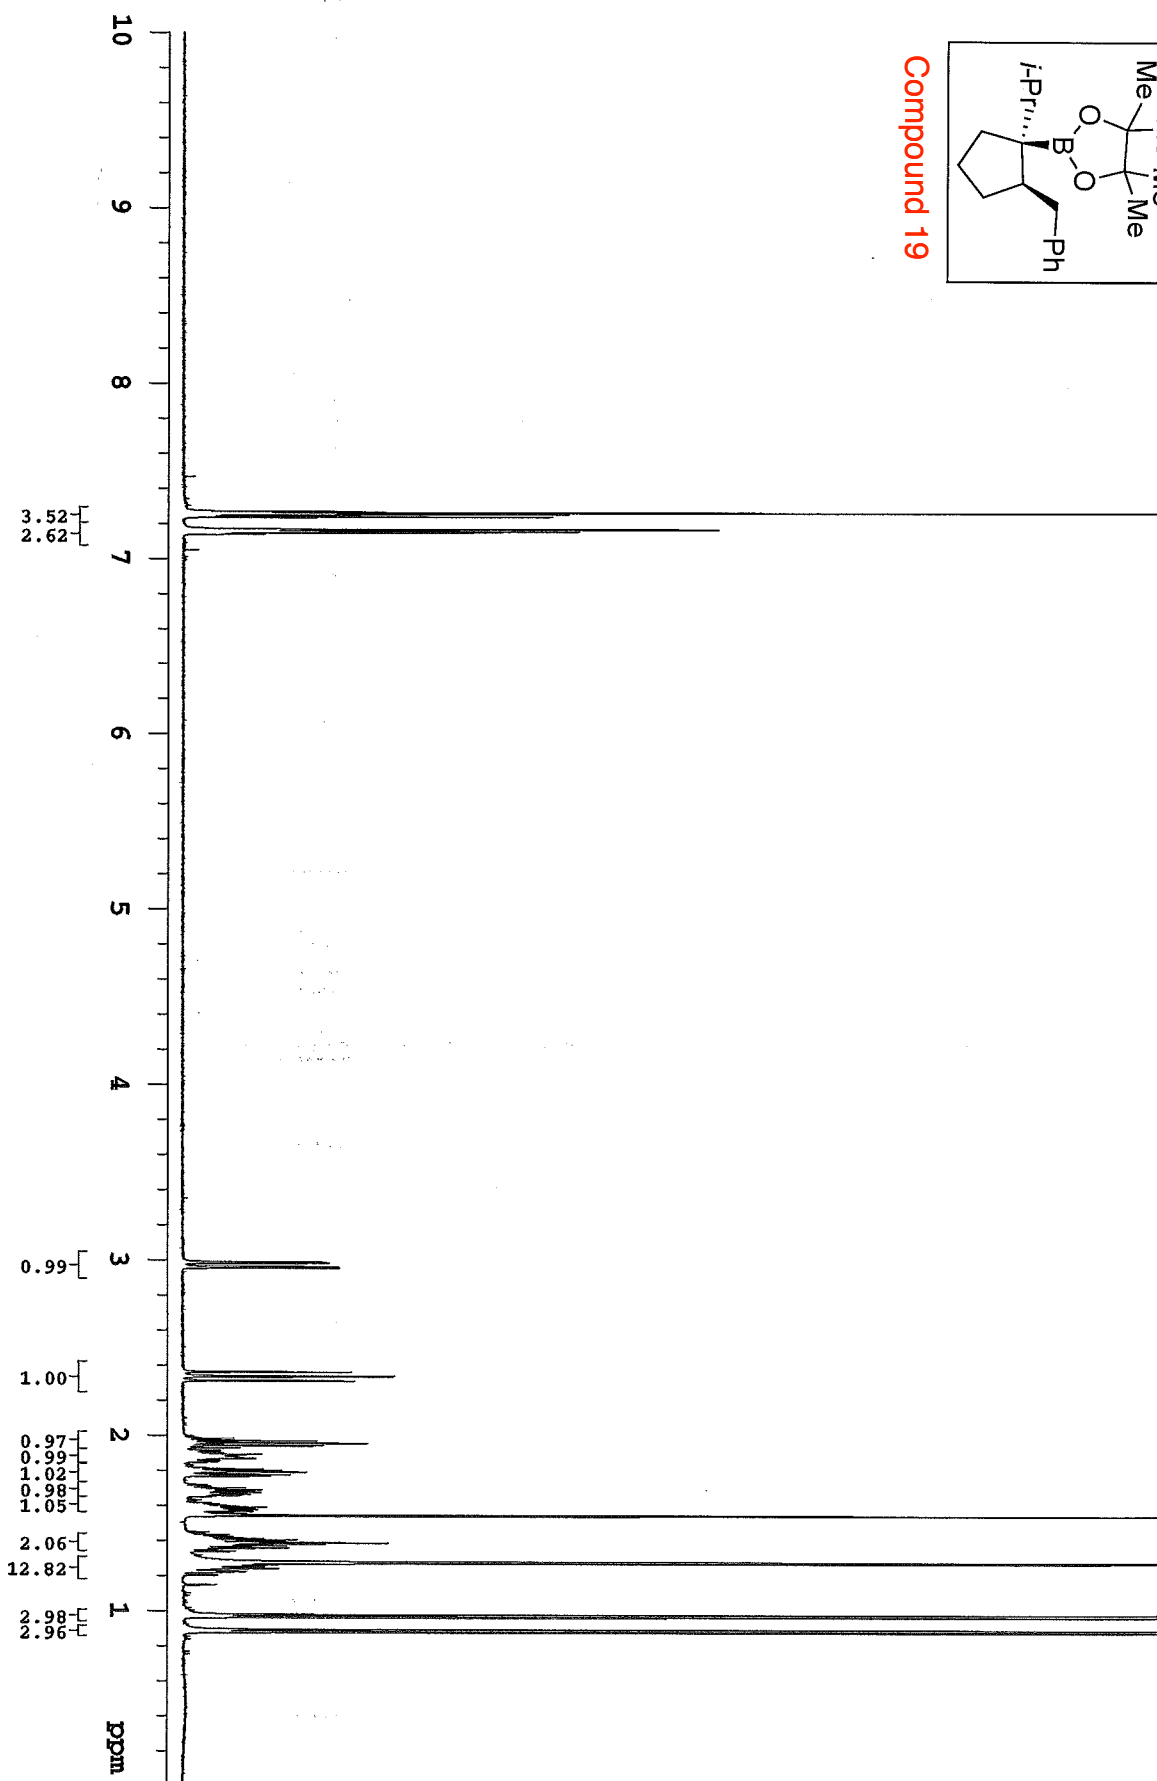

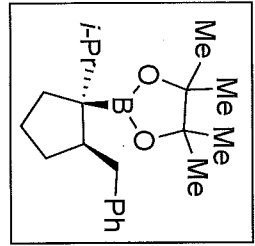

Compound 19

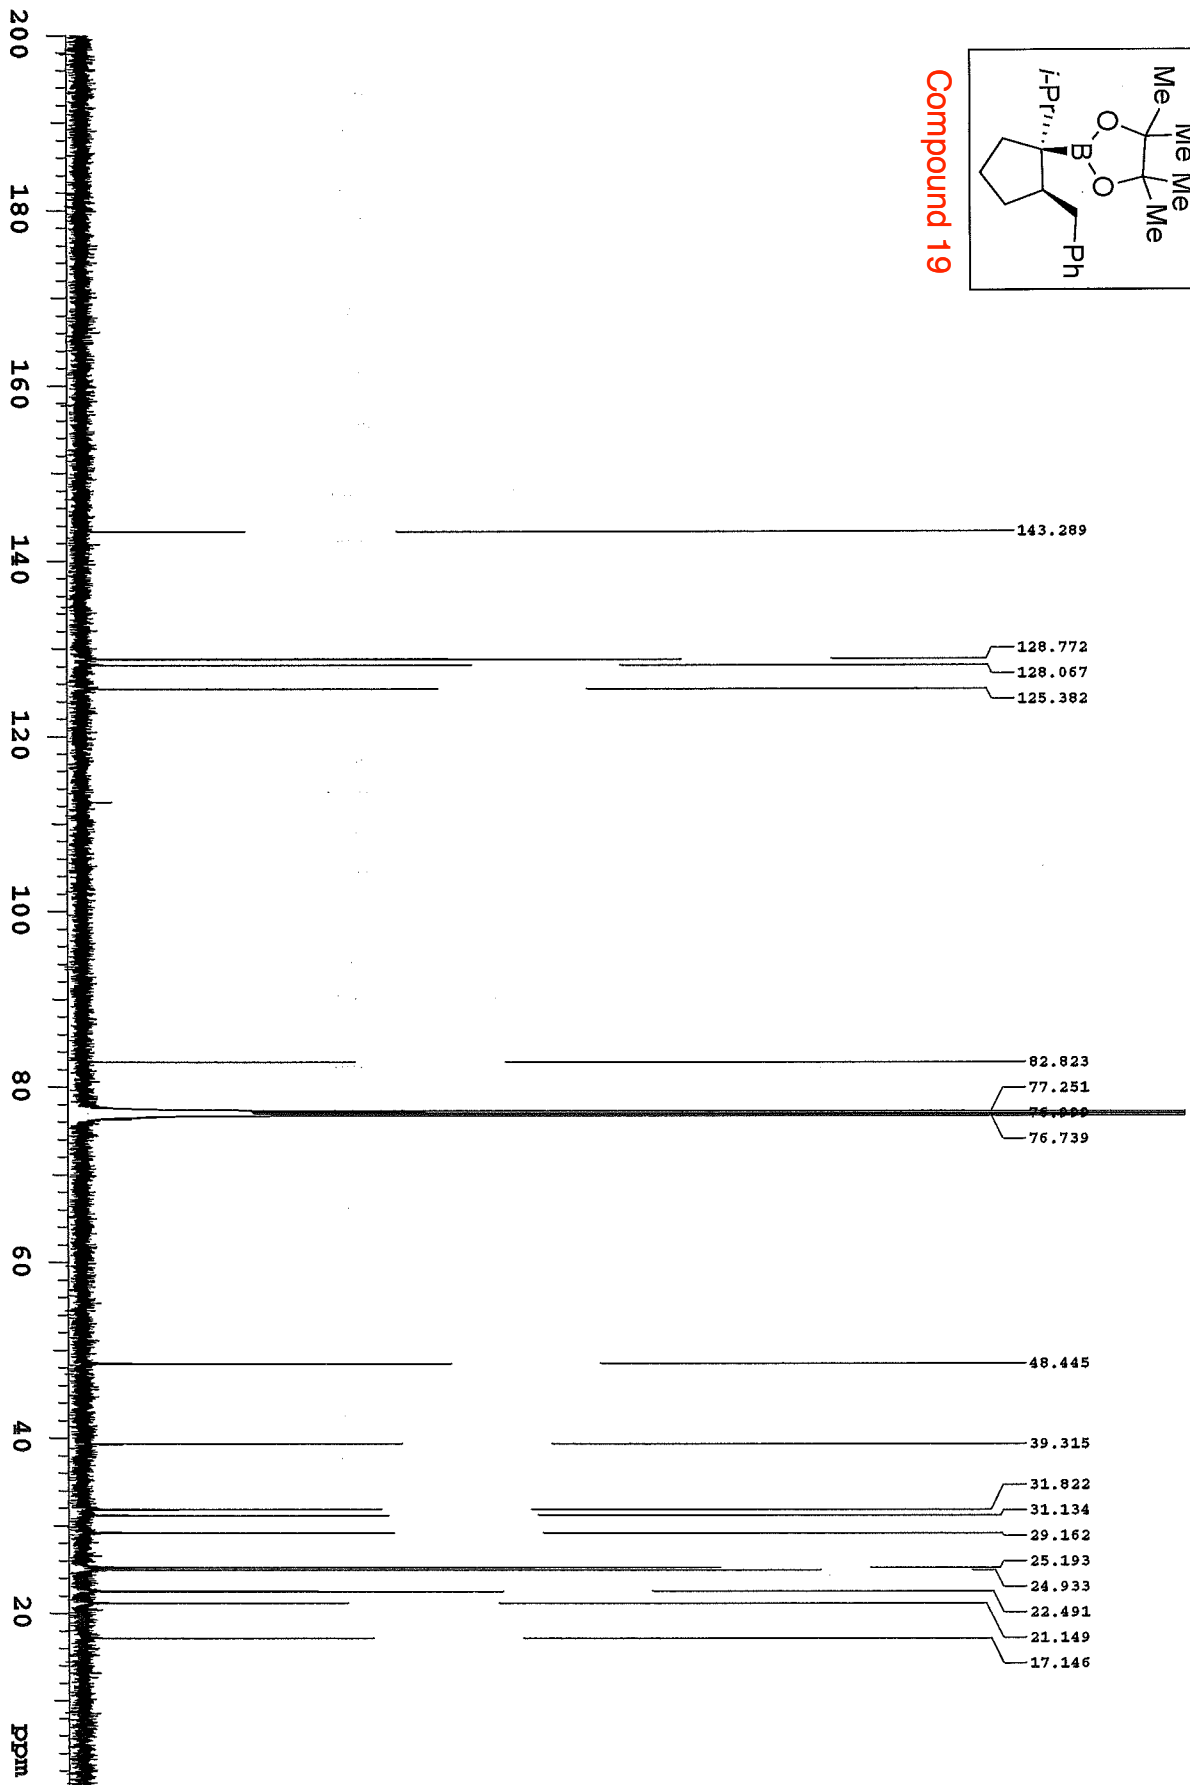



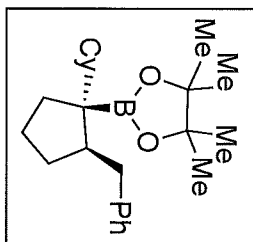

Compound 17

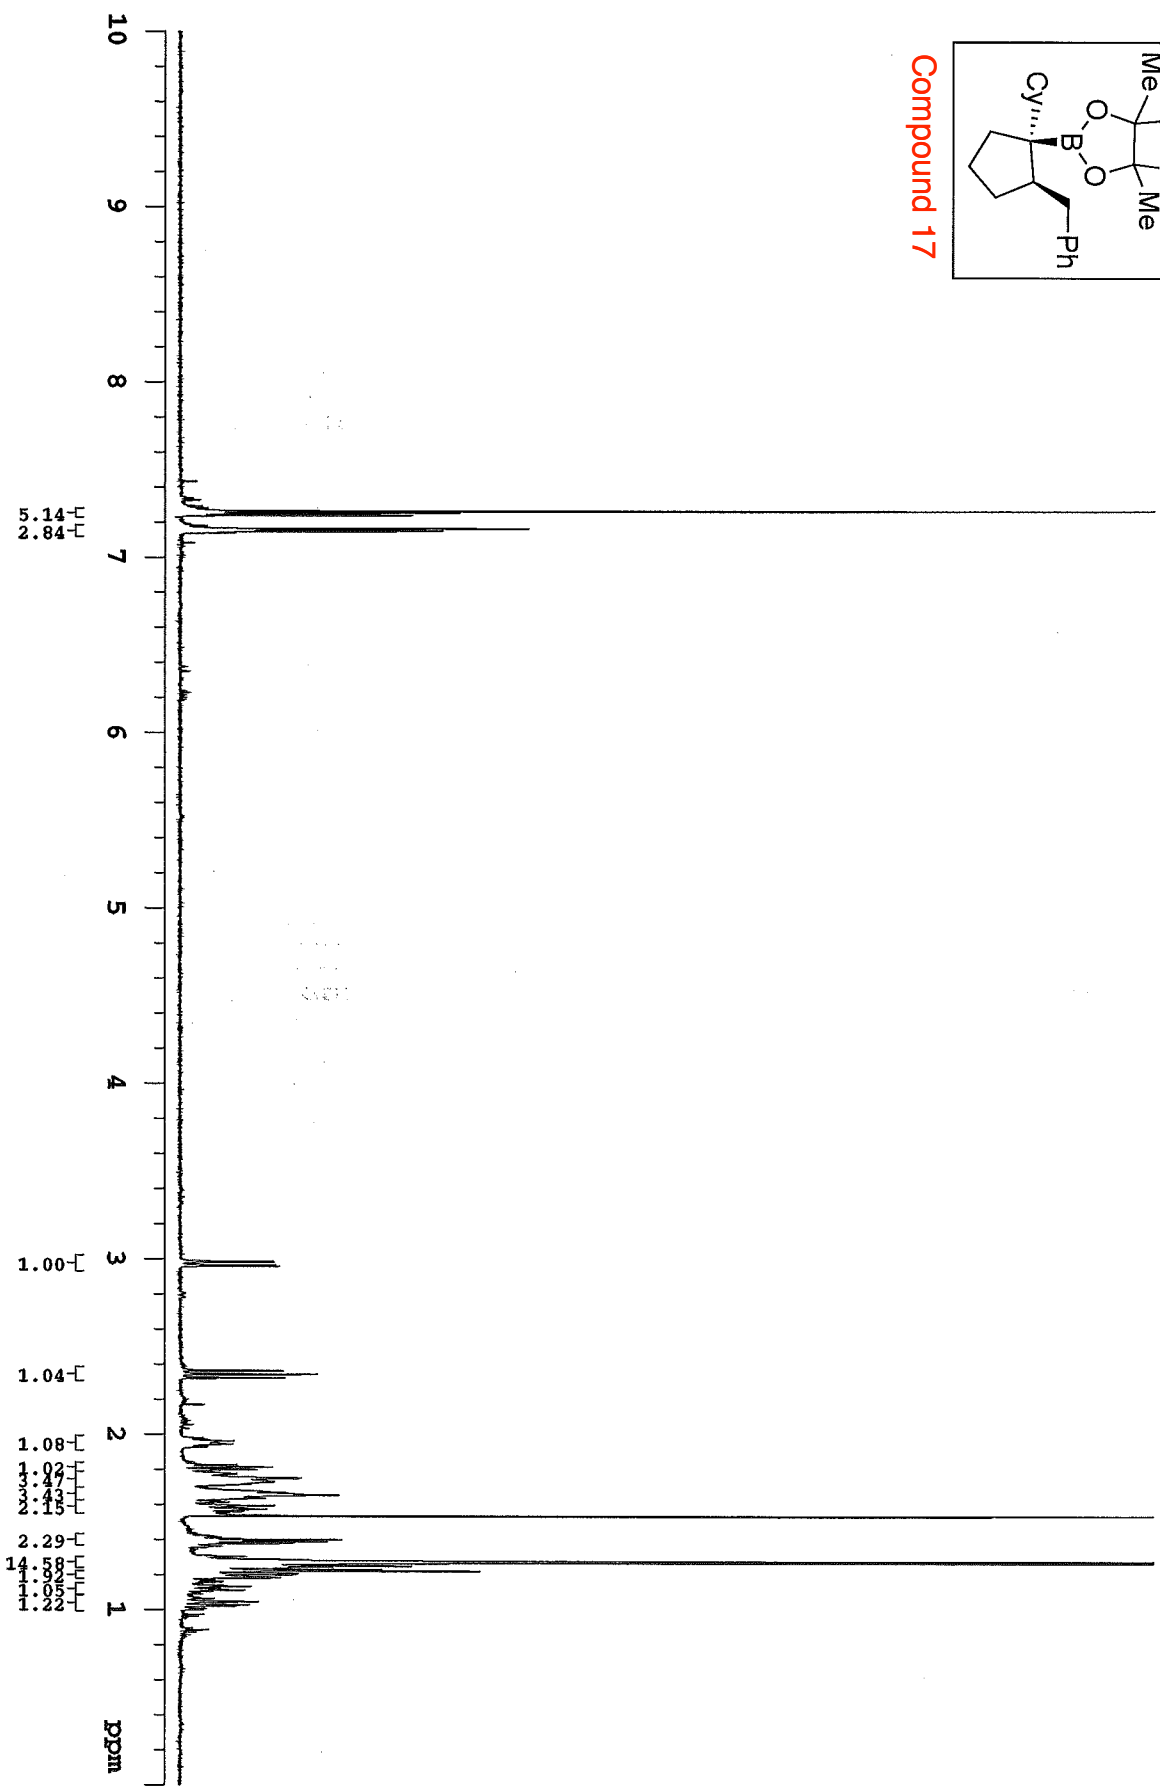

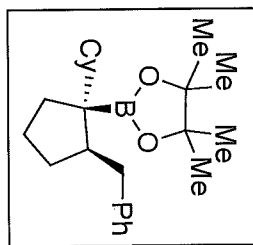

Compound 17

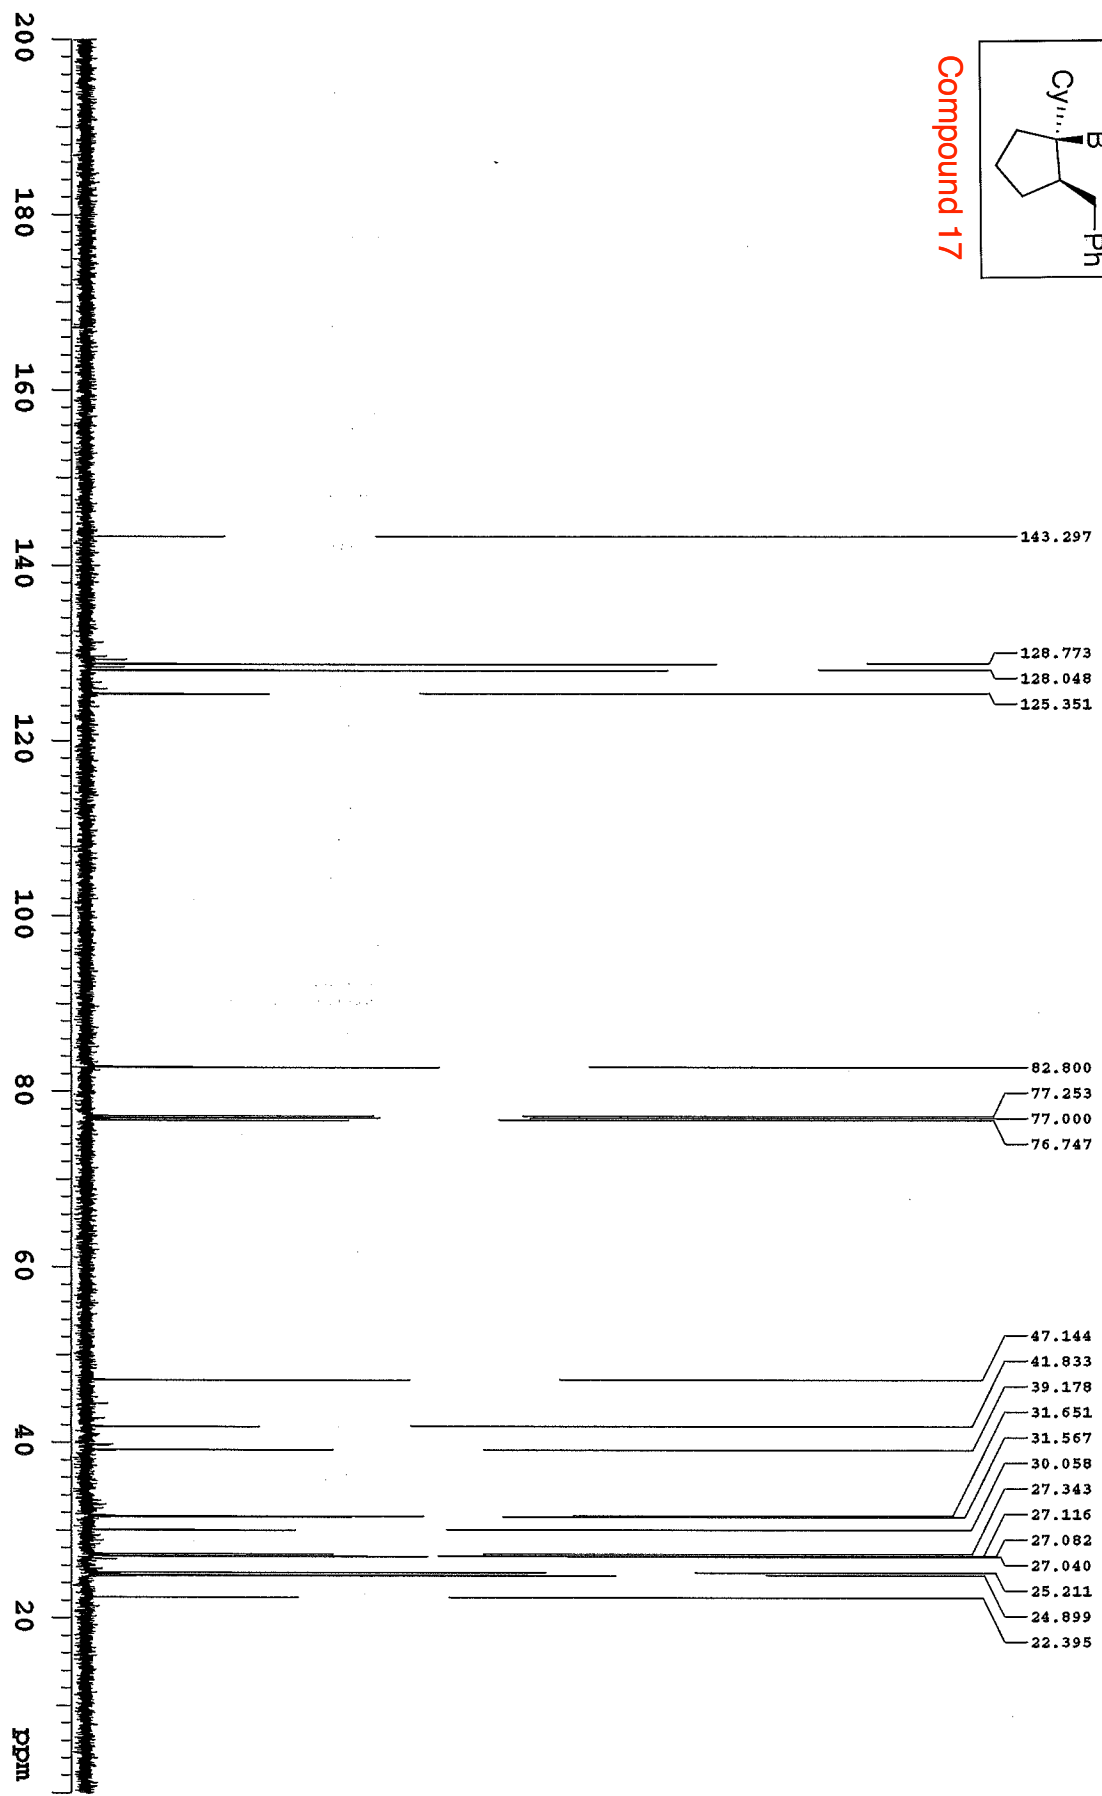

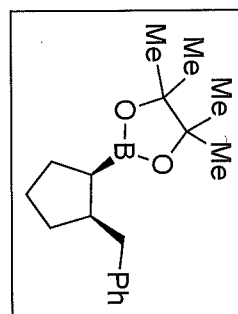

Compound 20

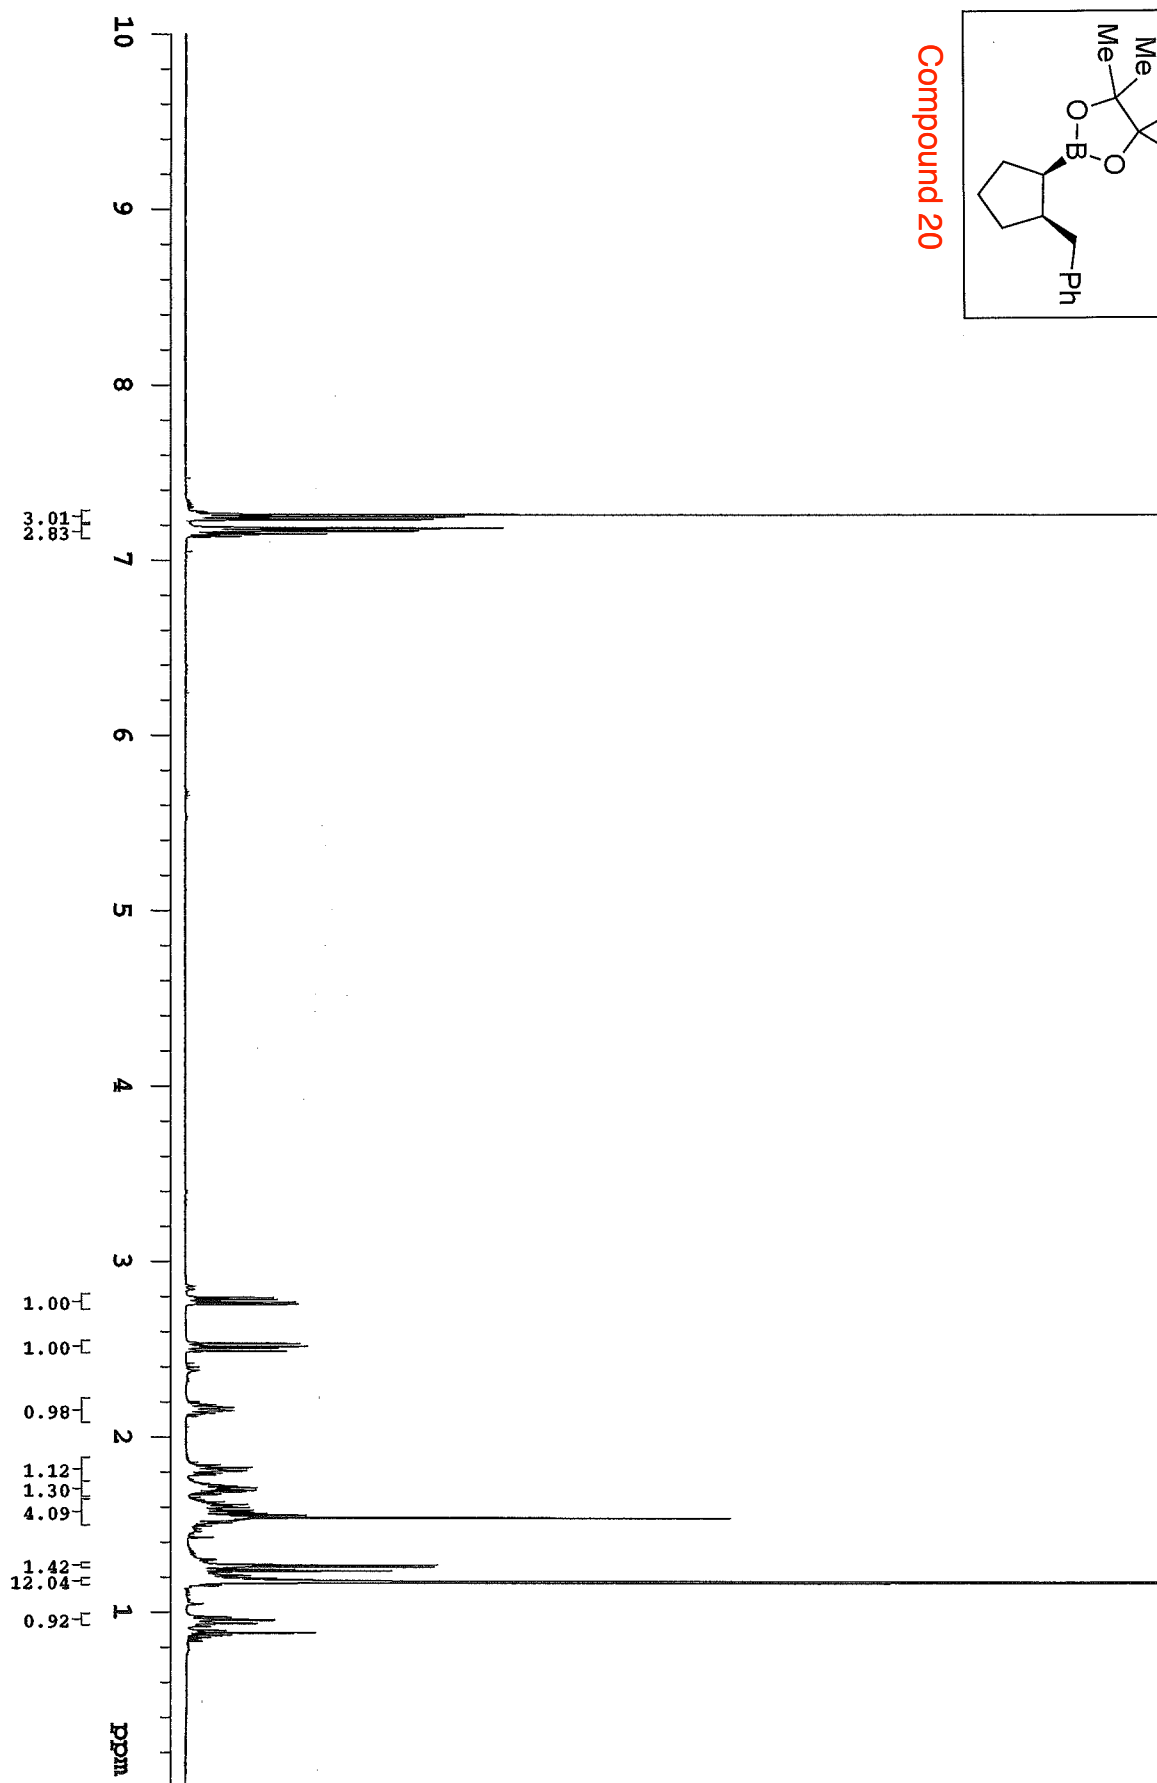

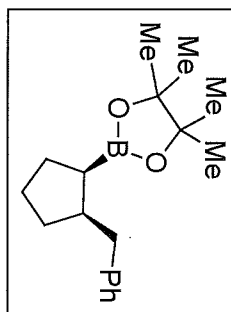

Compound 20

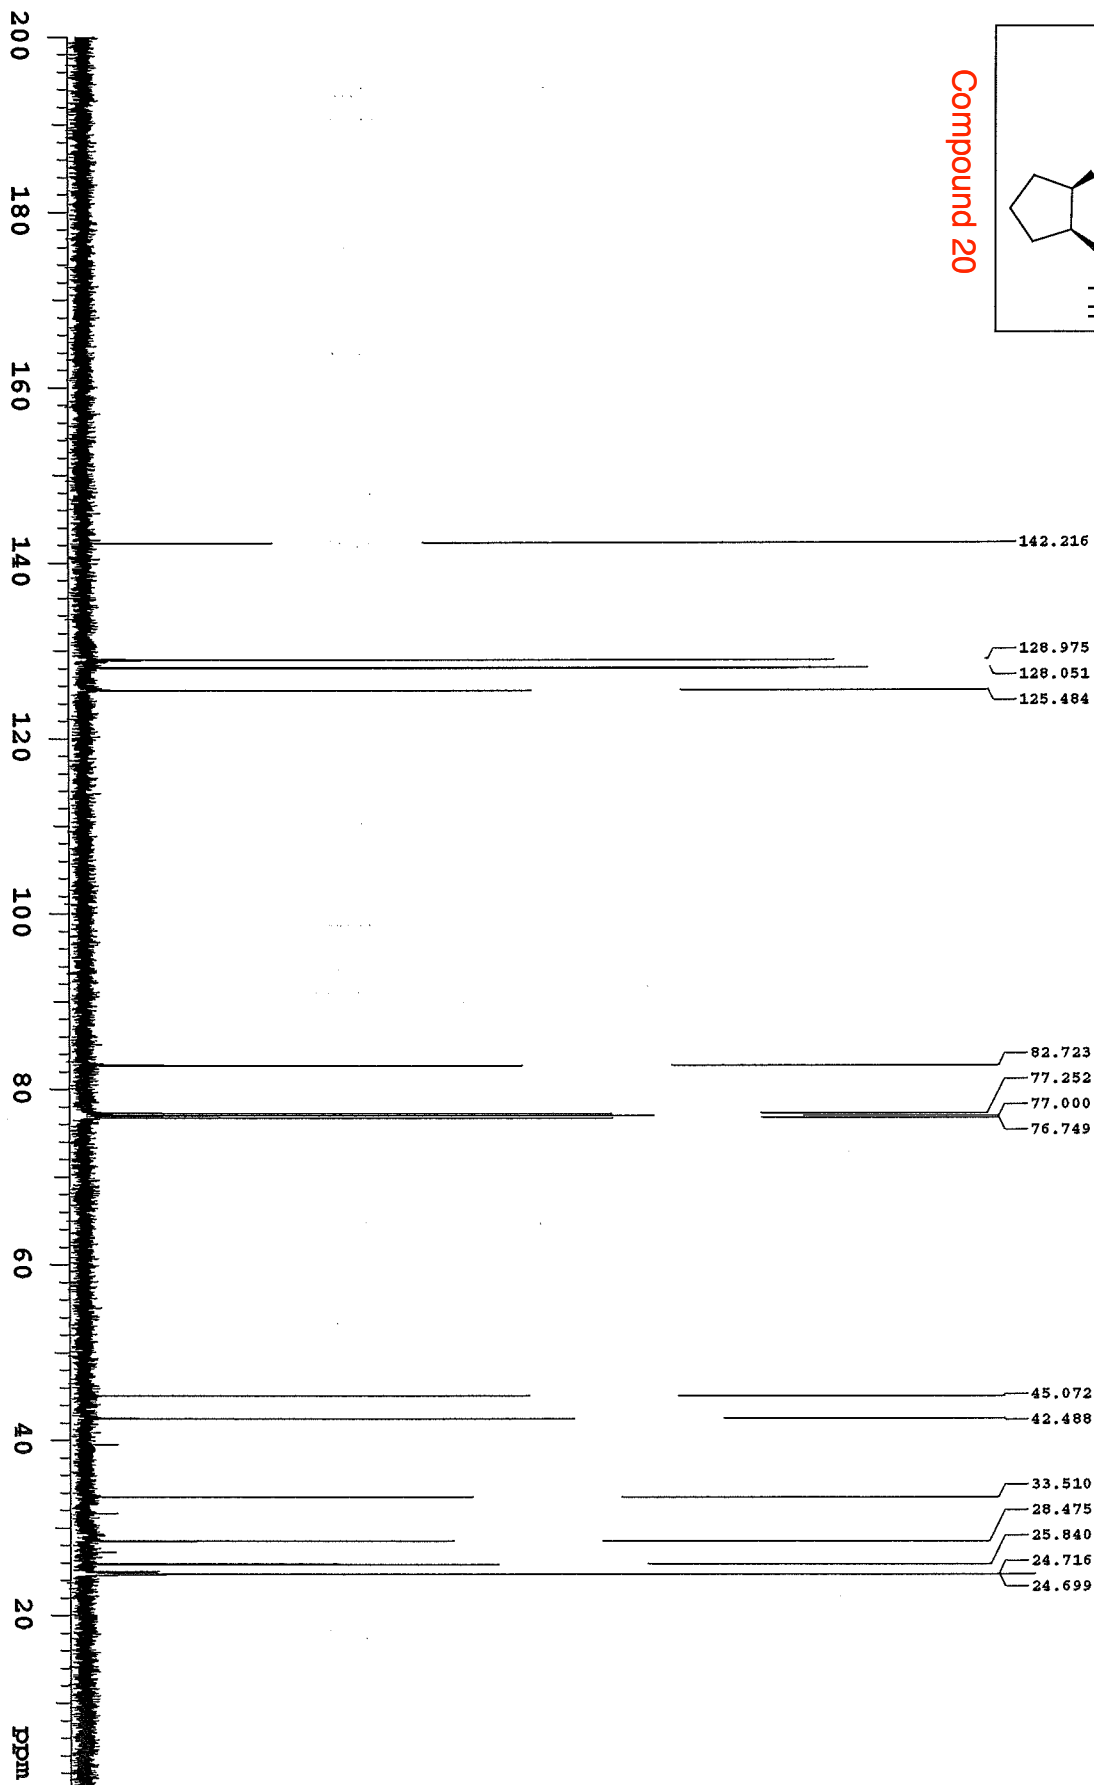

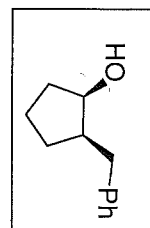

oxidized product  
of Compound 20

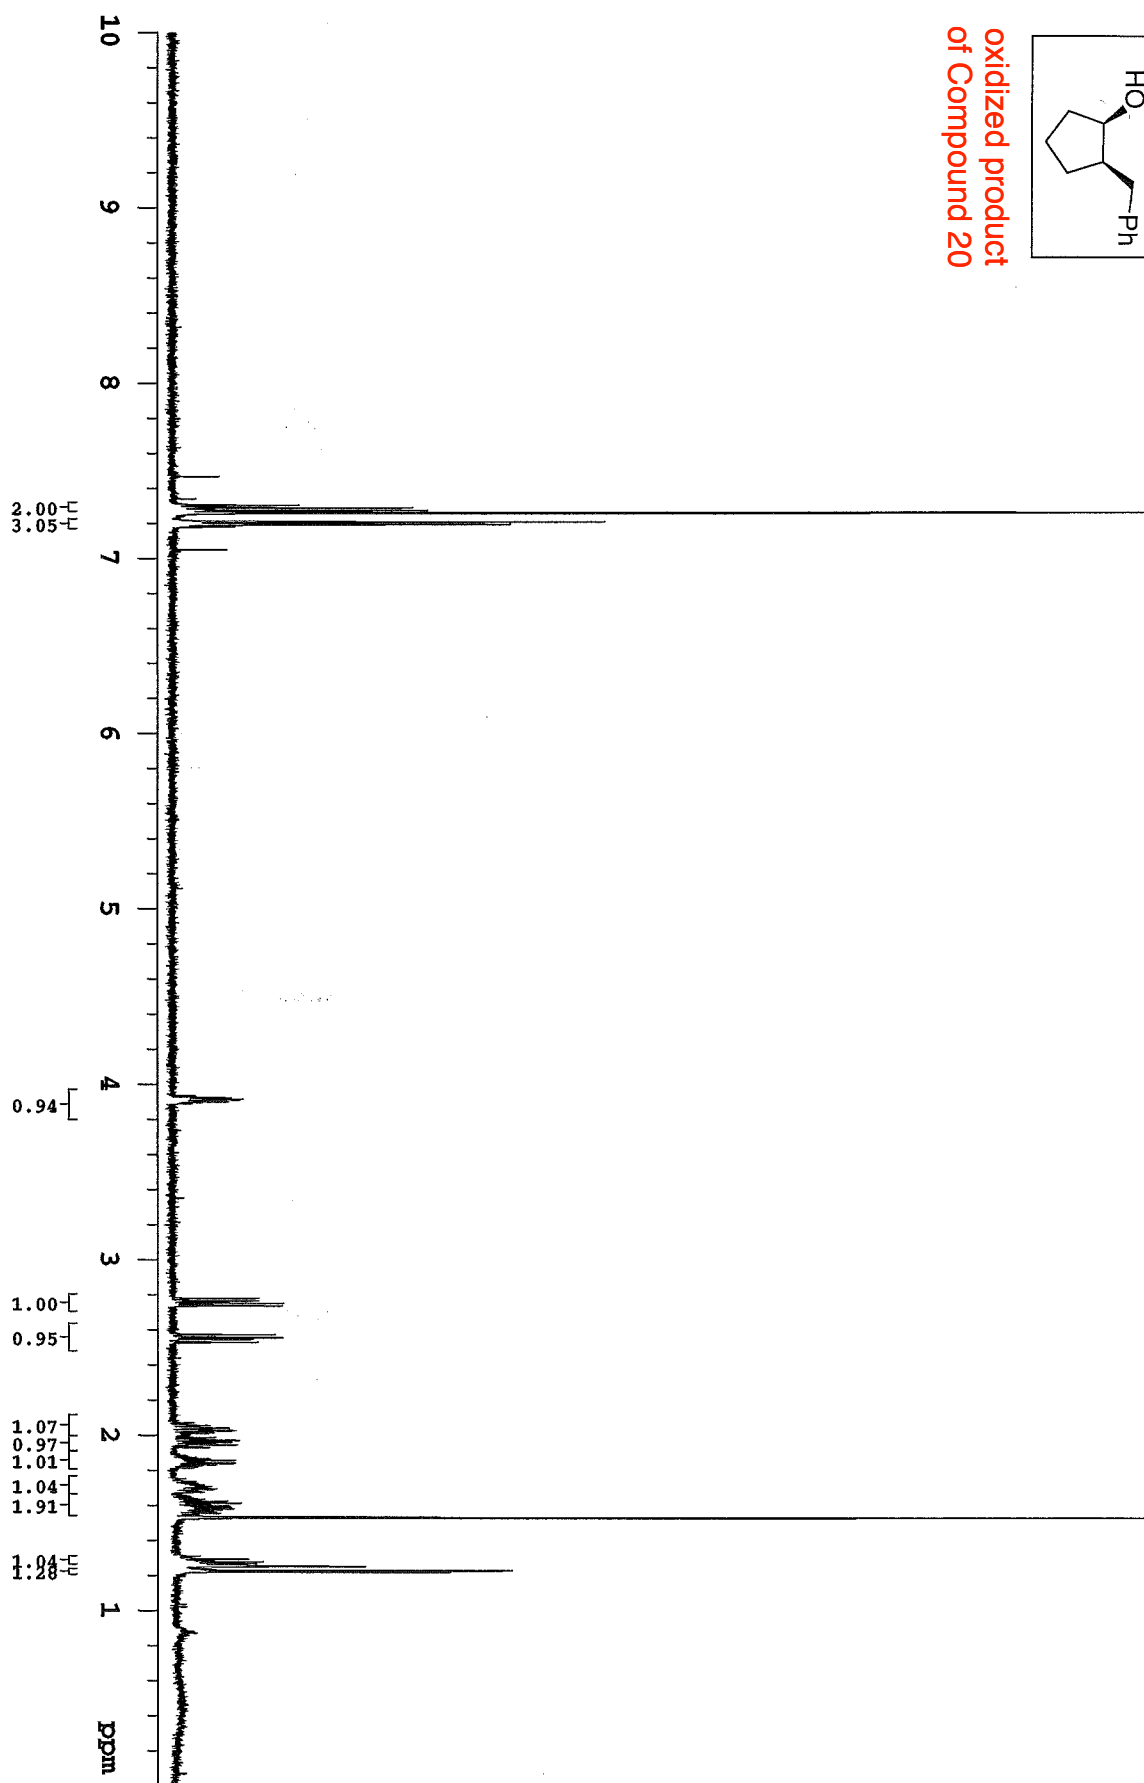

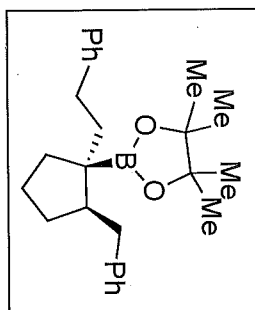

**Compound 15,**  
**major diastereomer**

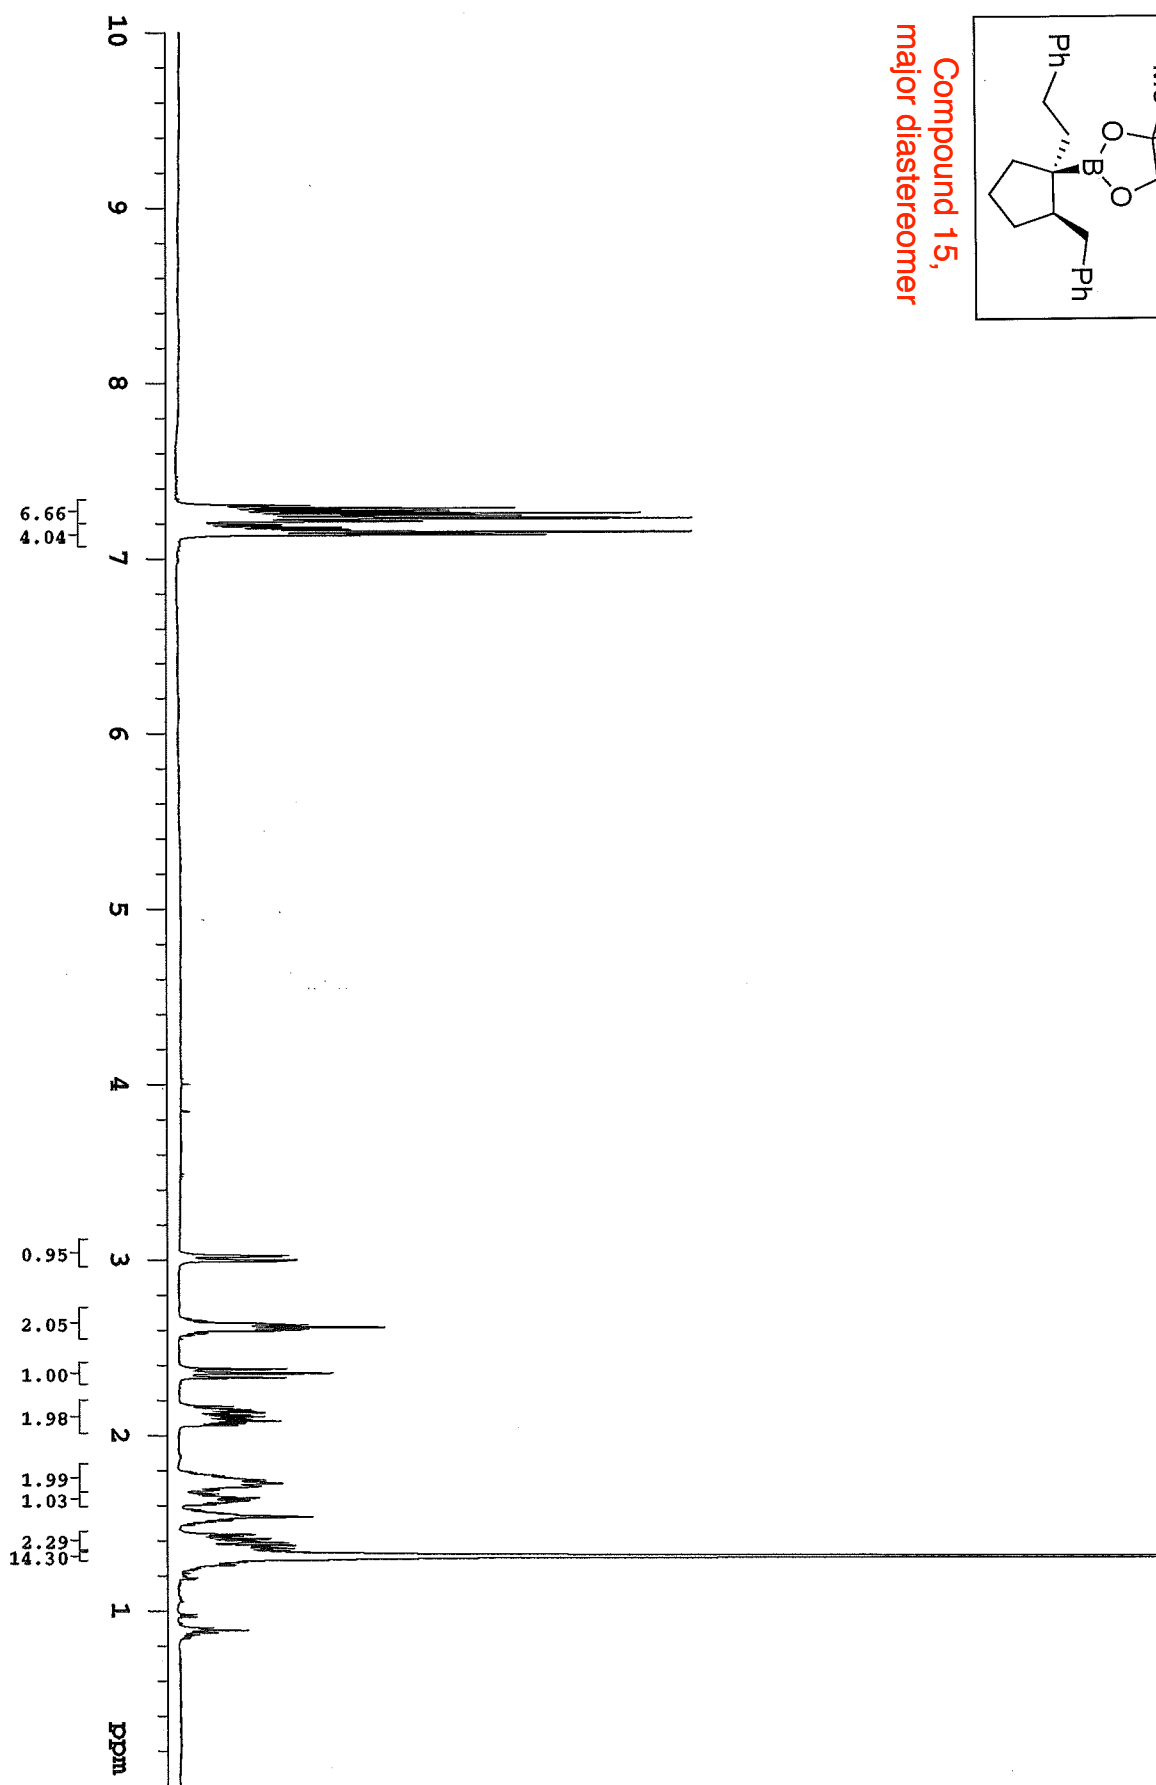

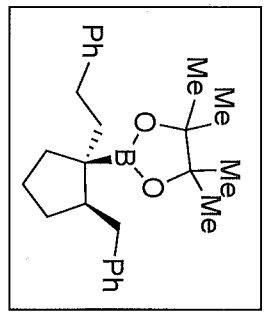

Compound 15,  
major diastereomer

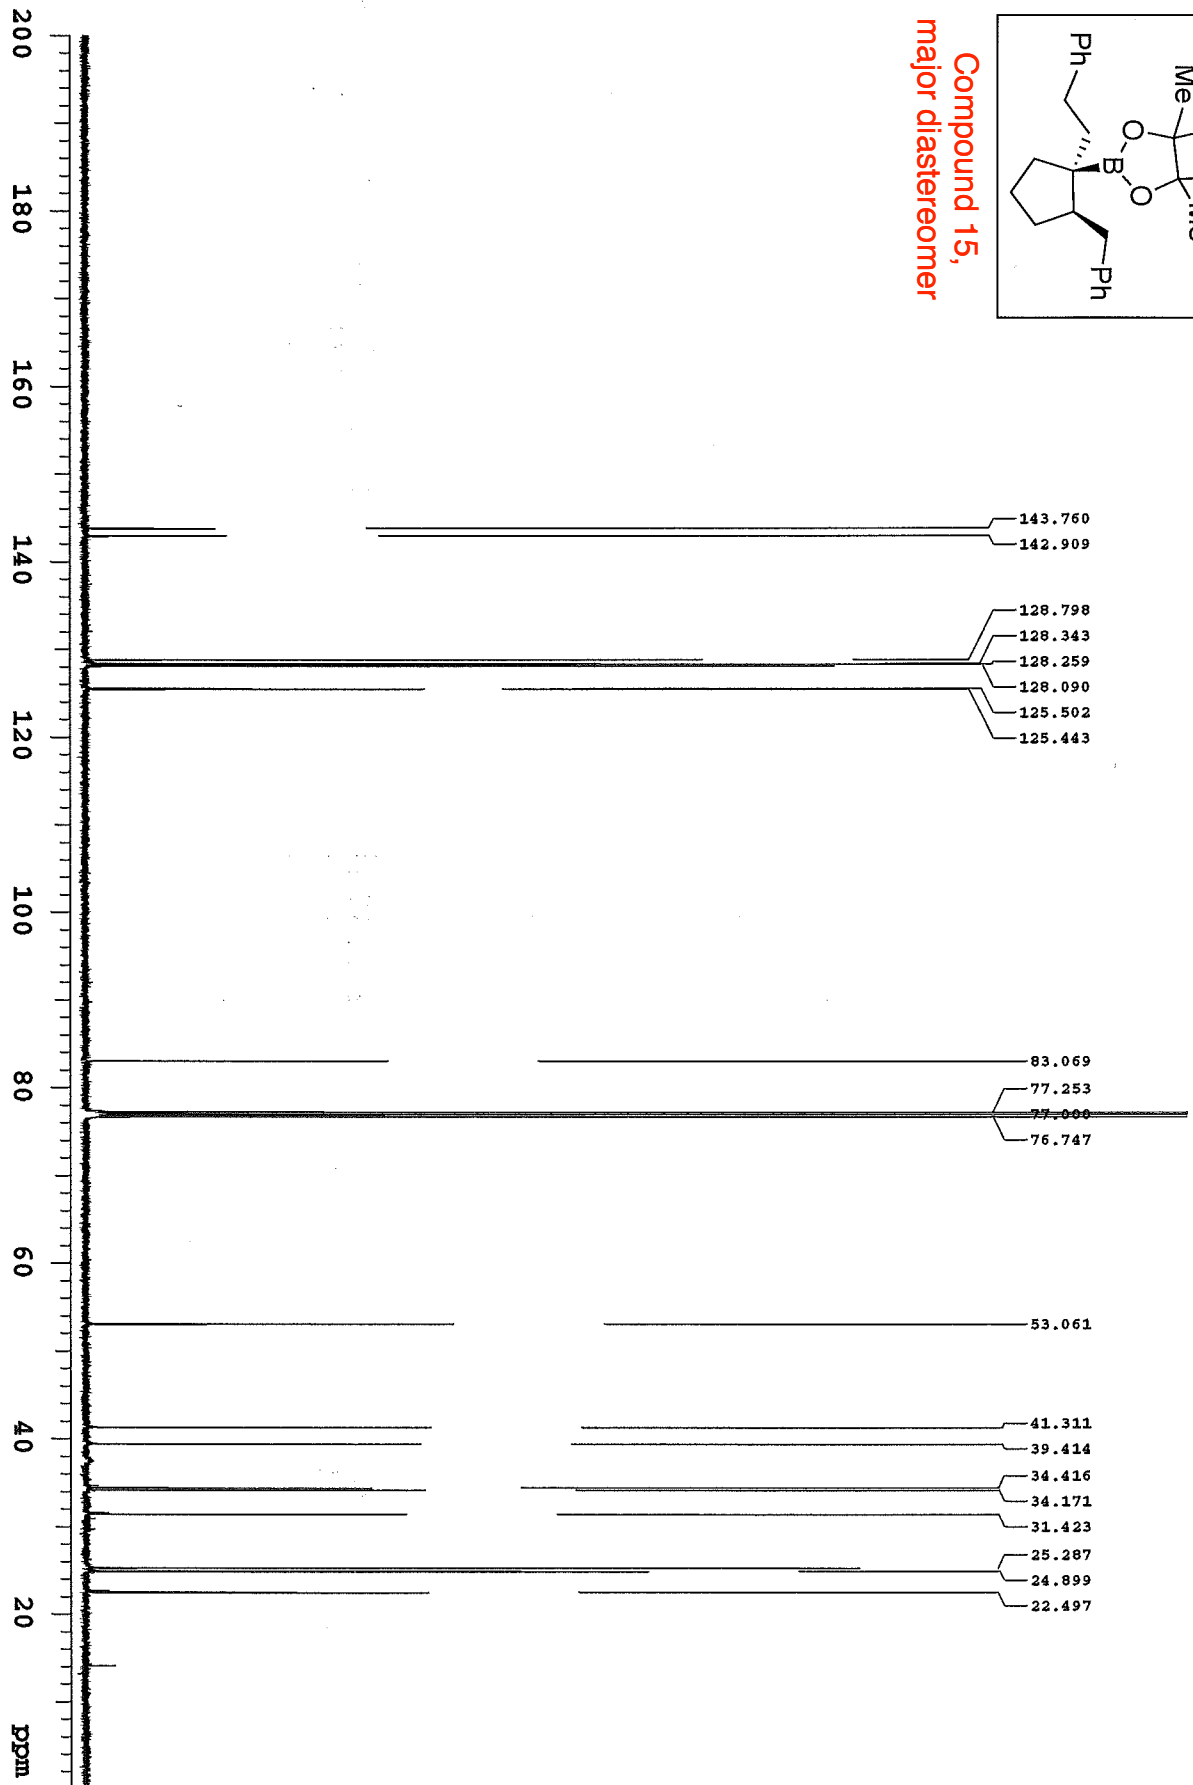

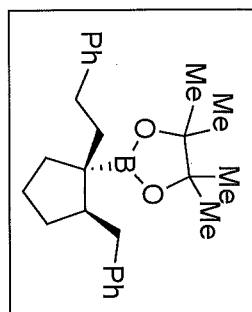

Compound 15,  
minor diastereomer

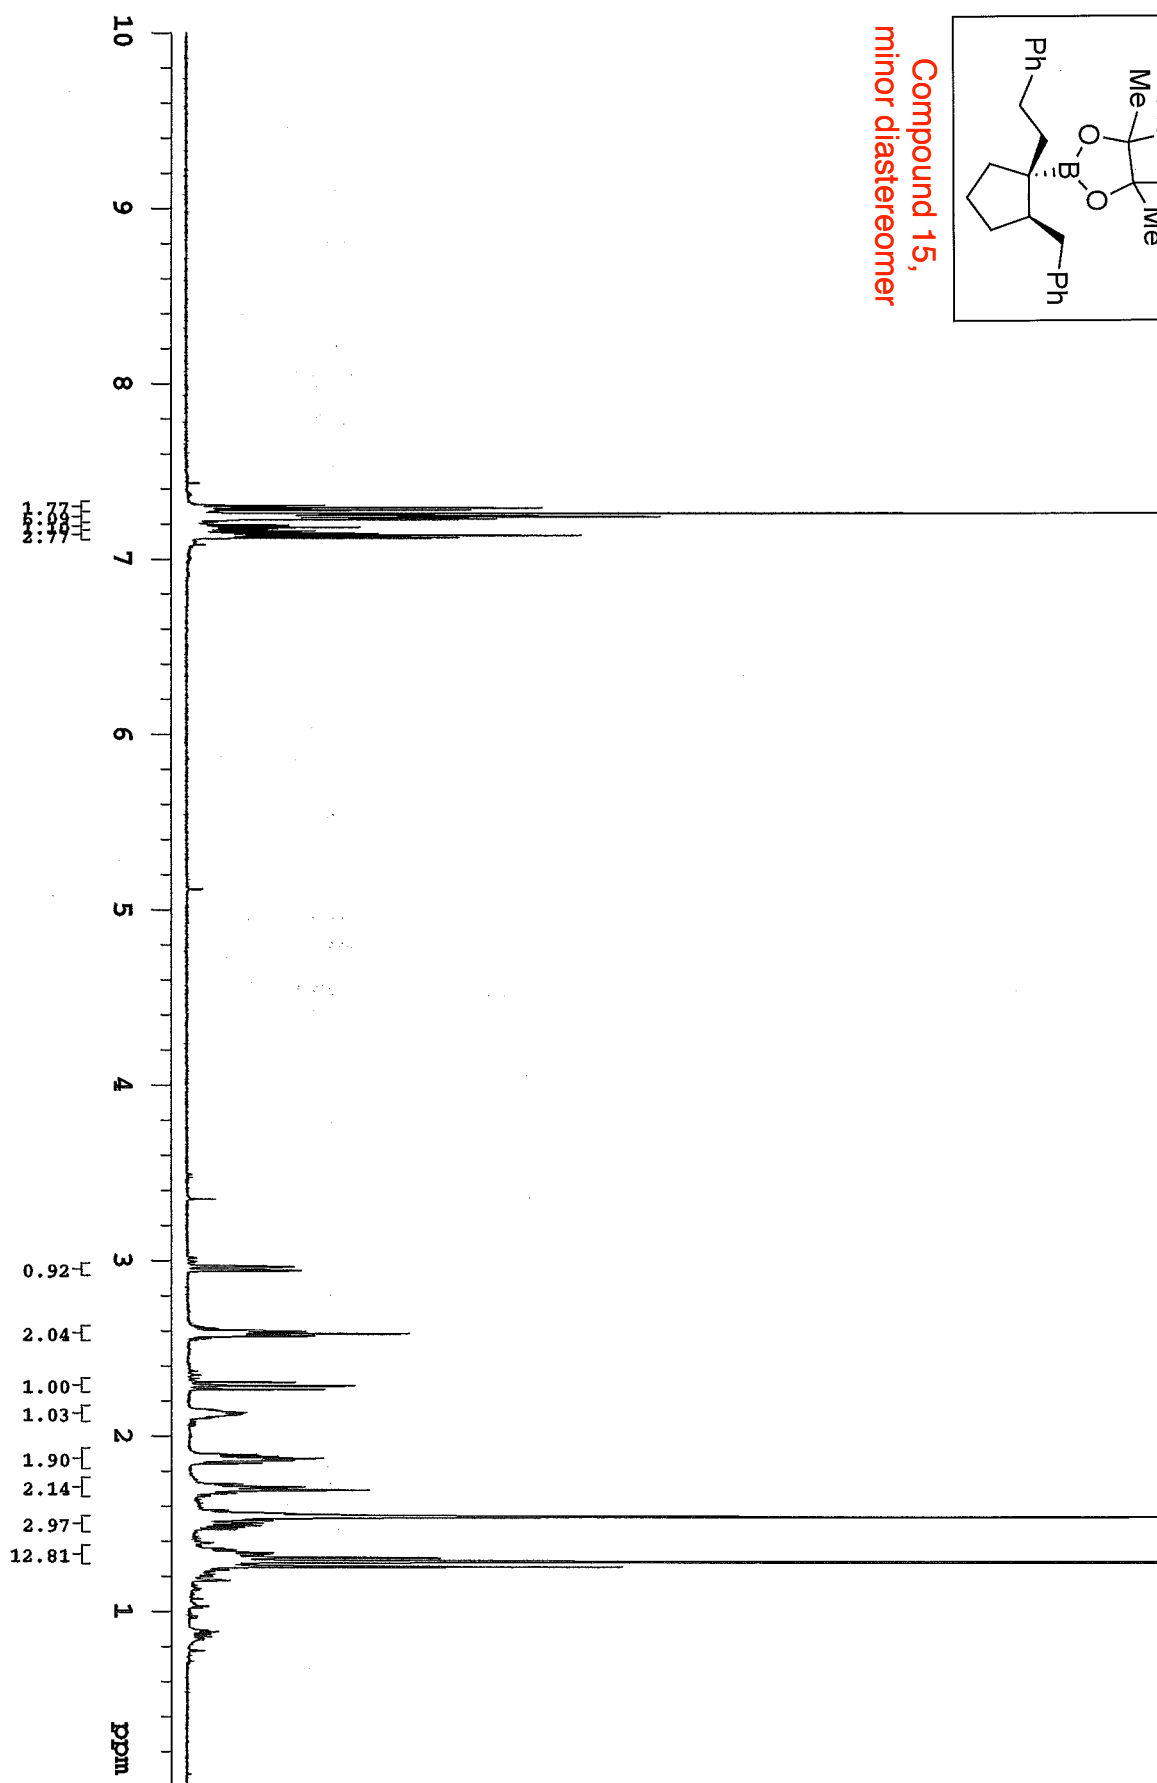



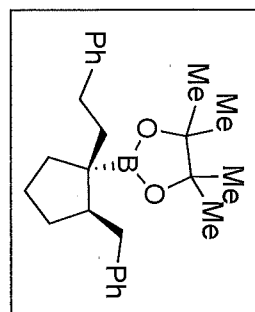

Compound 15,  
minor diastereomer

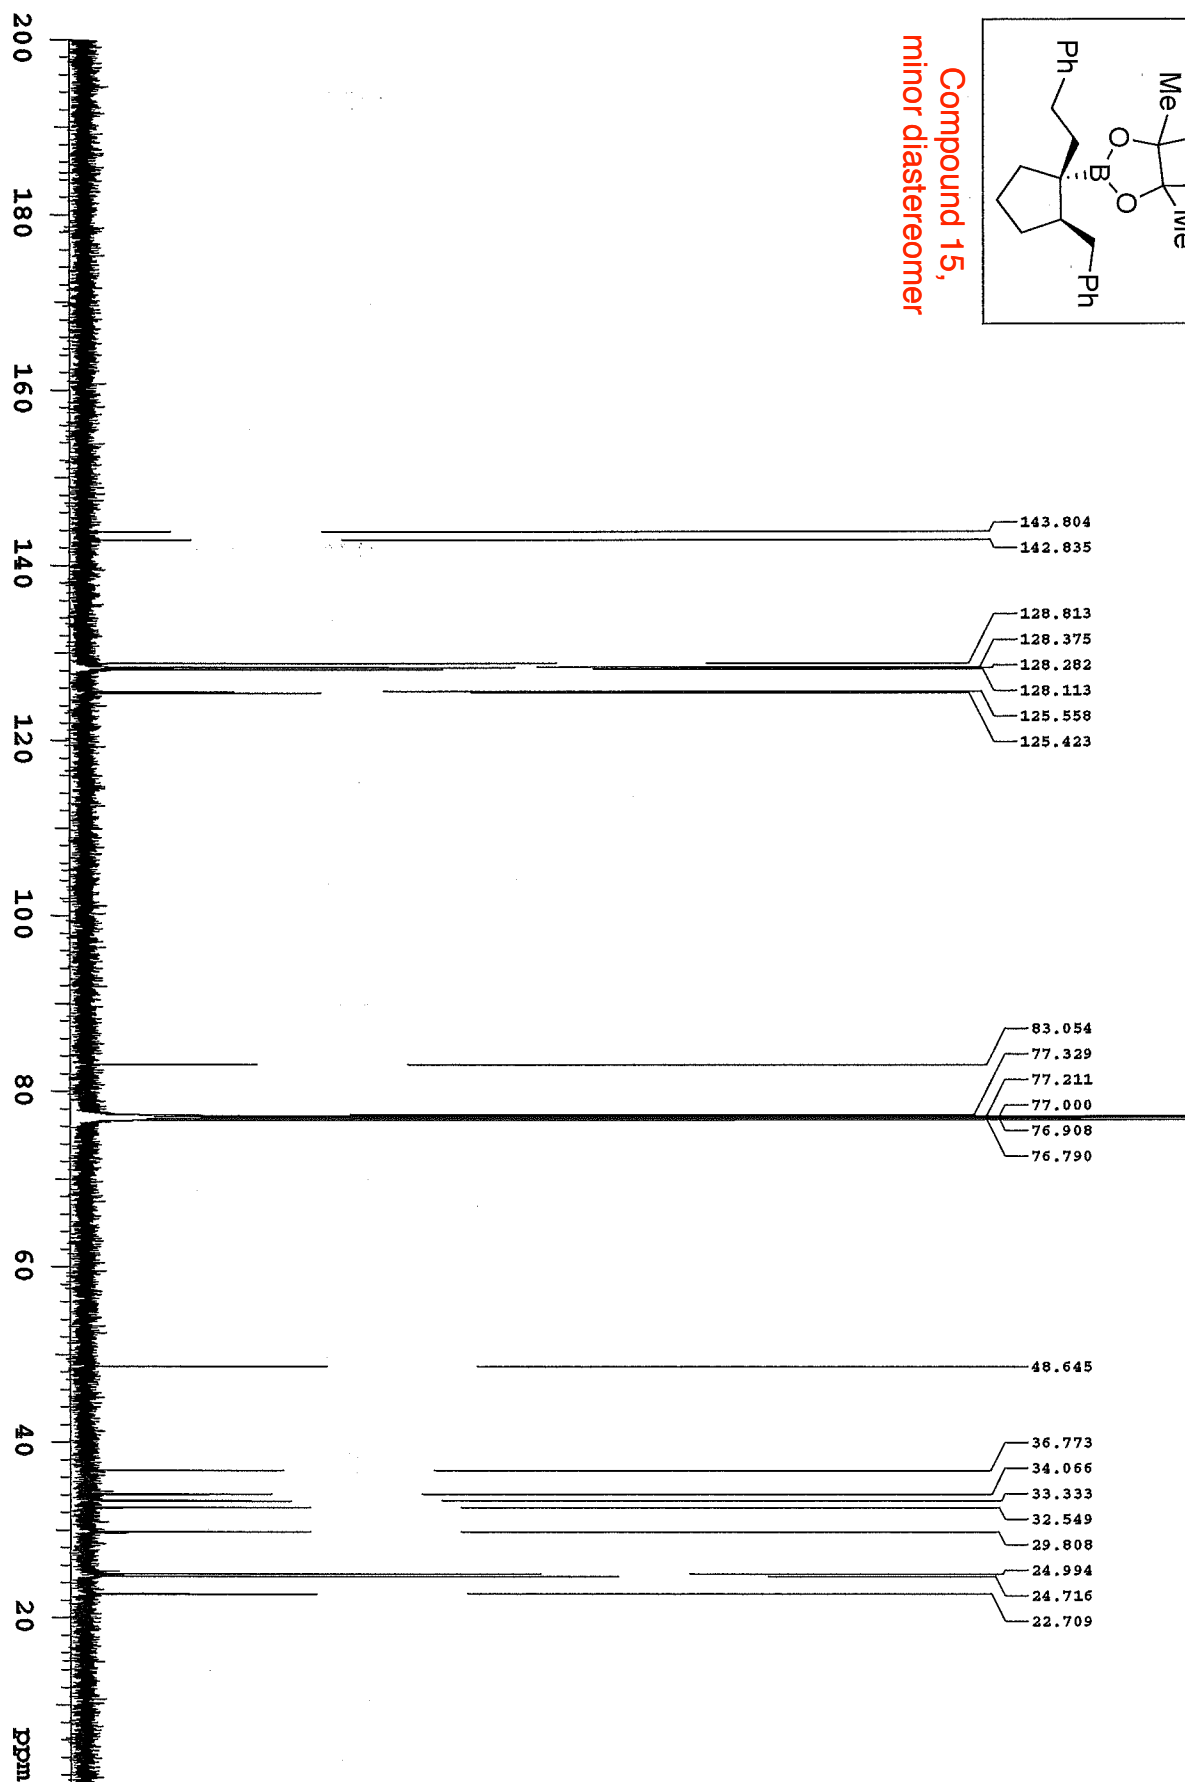

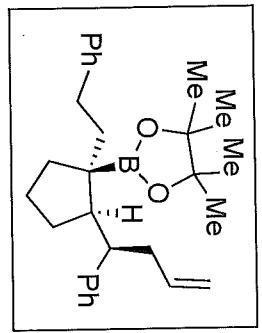

Compound 38

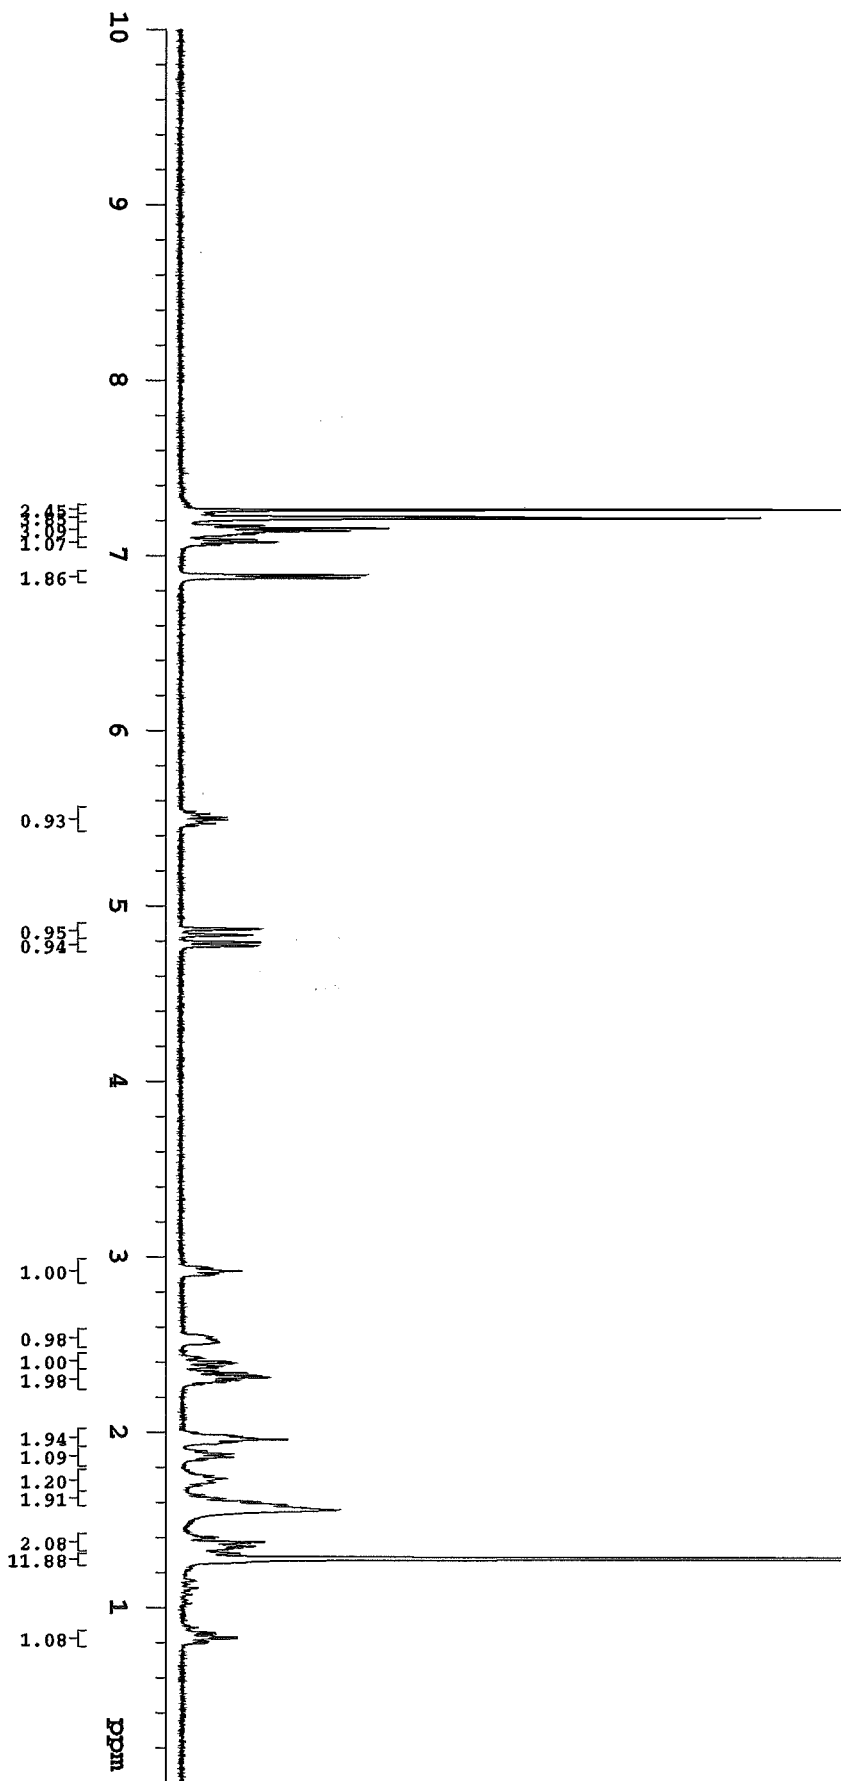

Compound 38

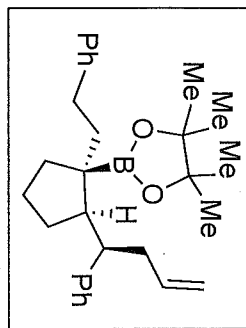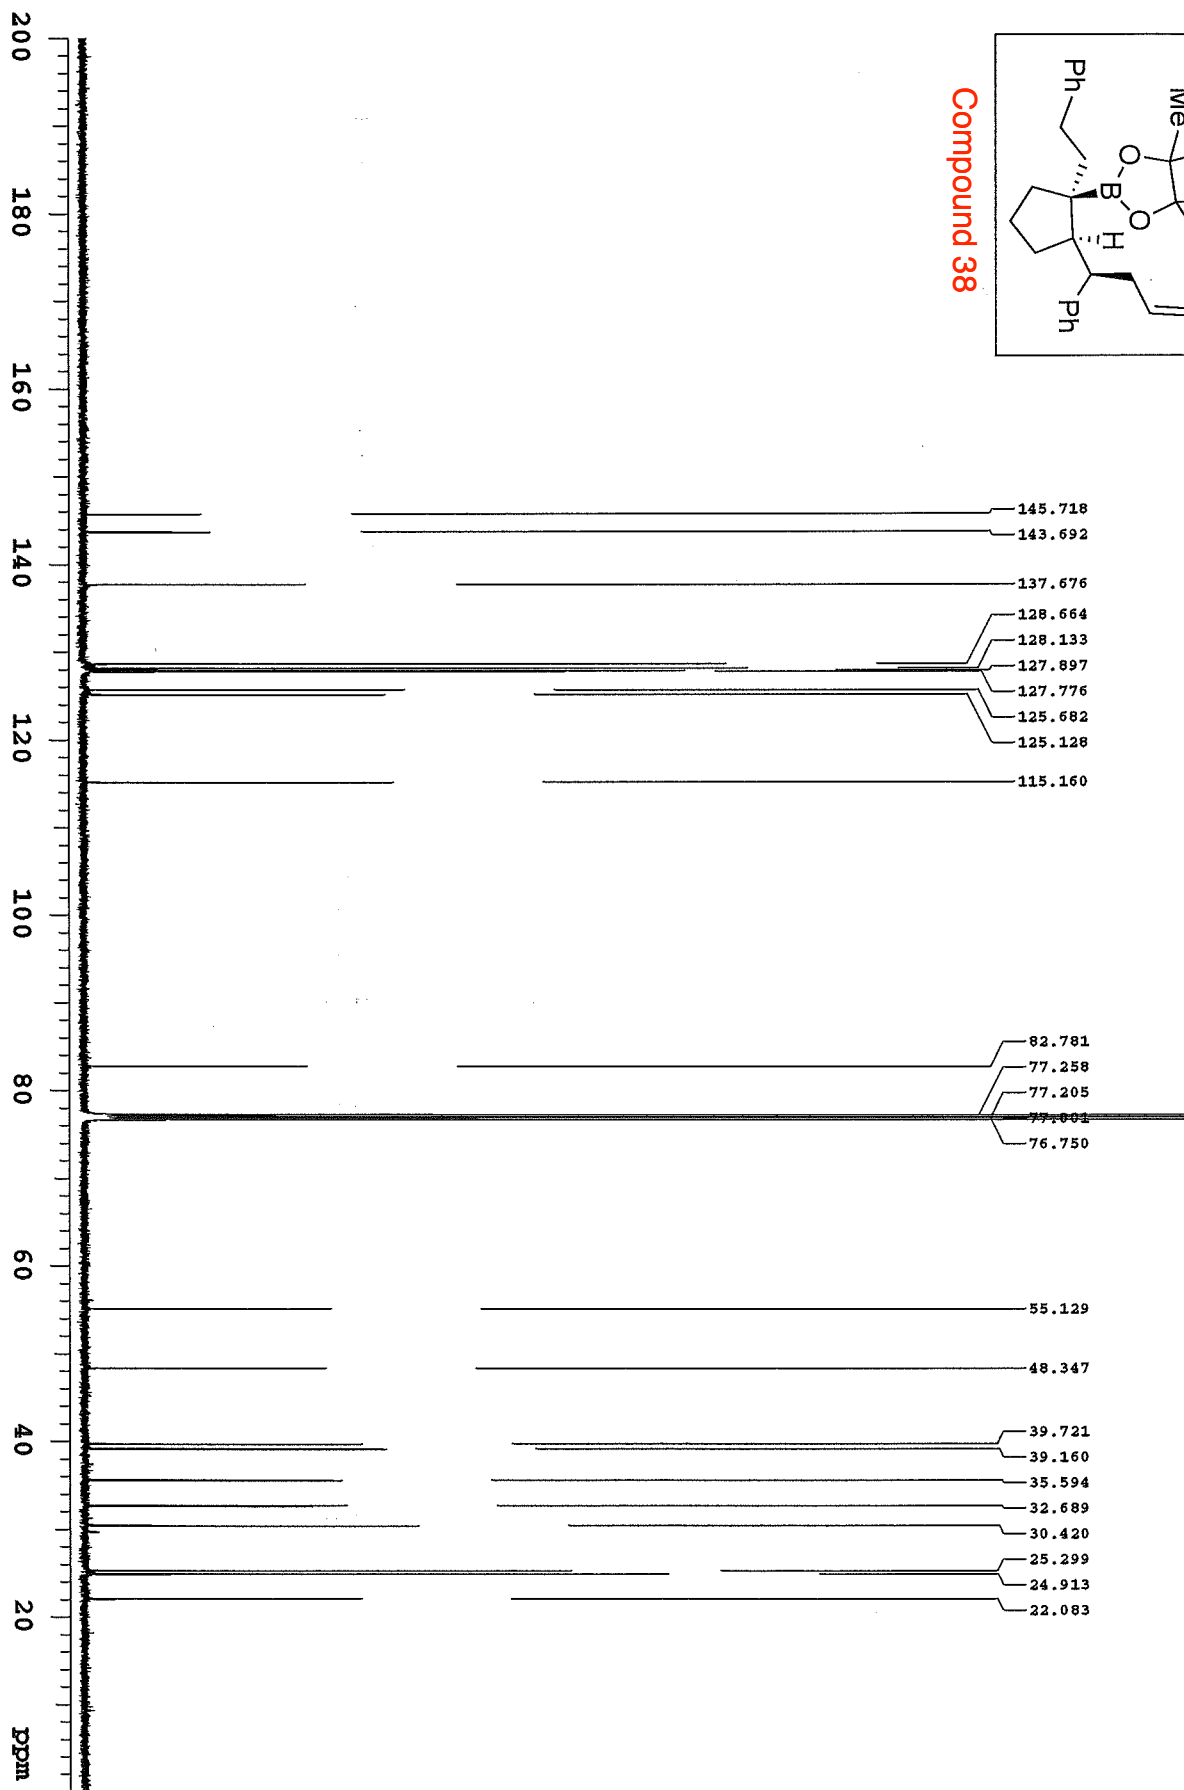

Compound 16

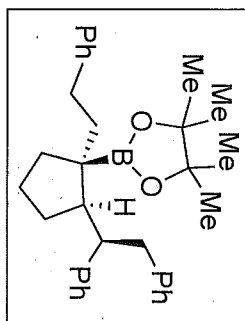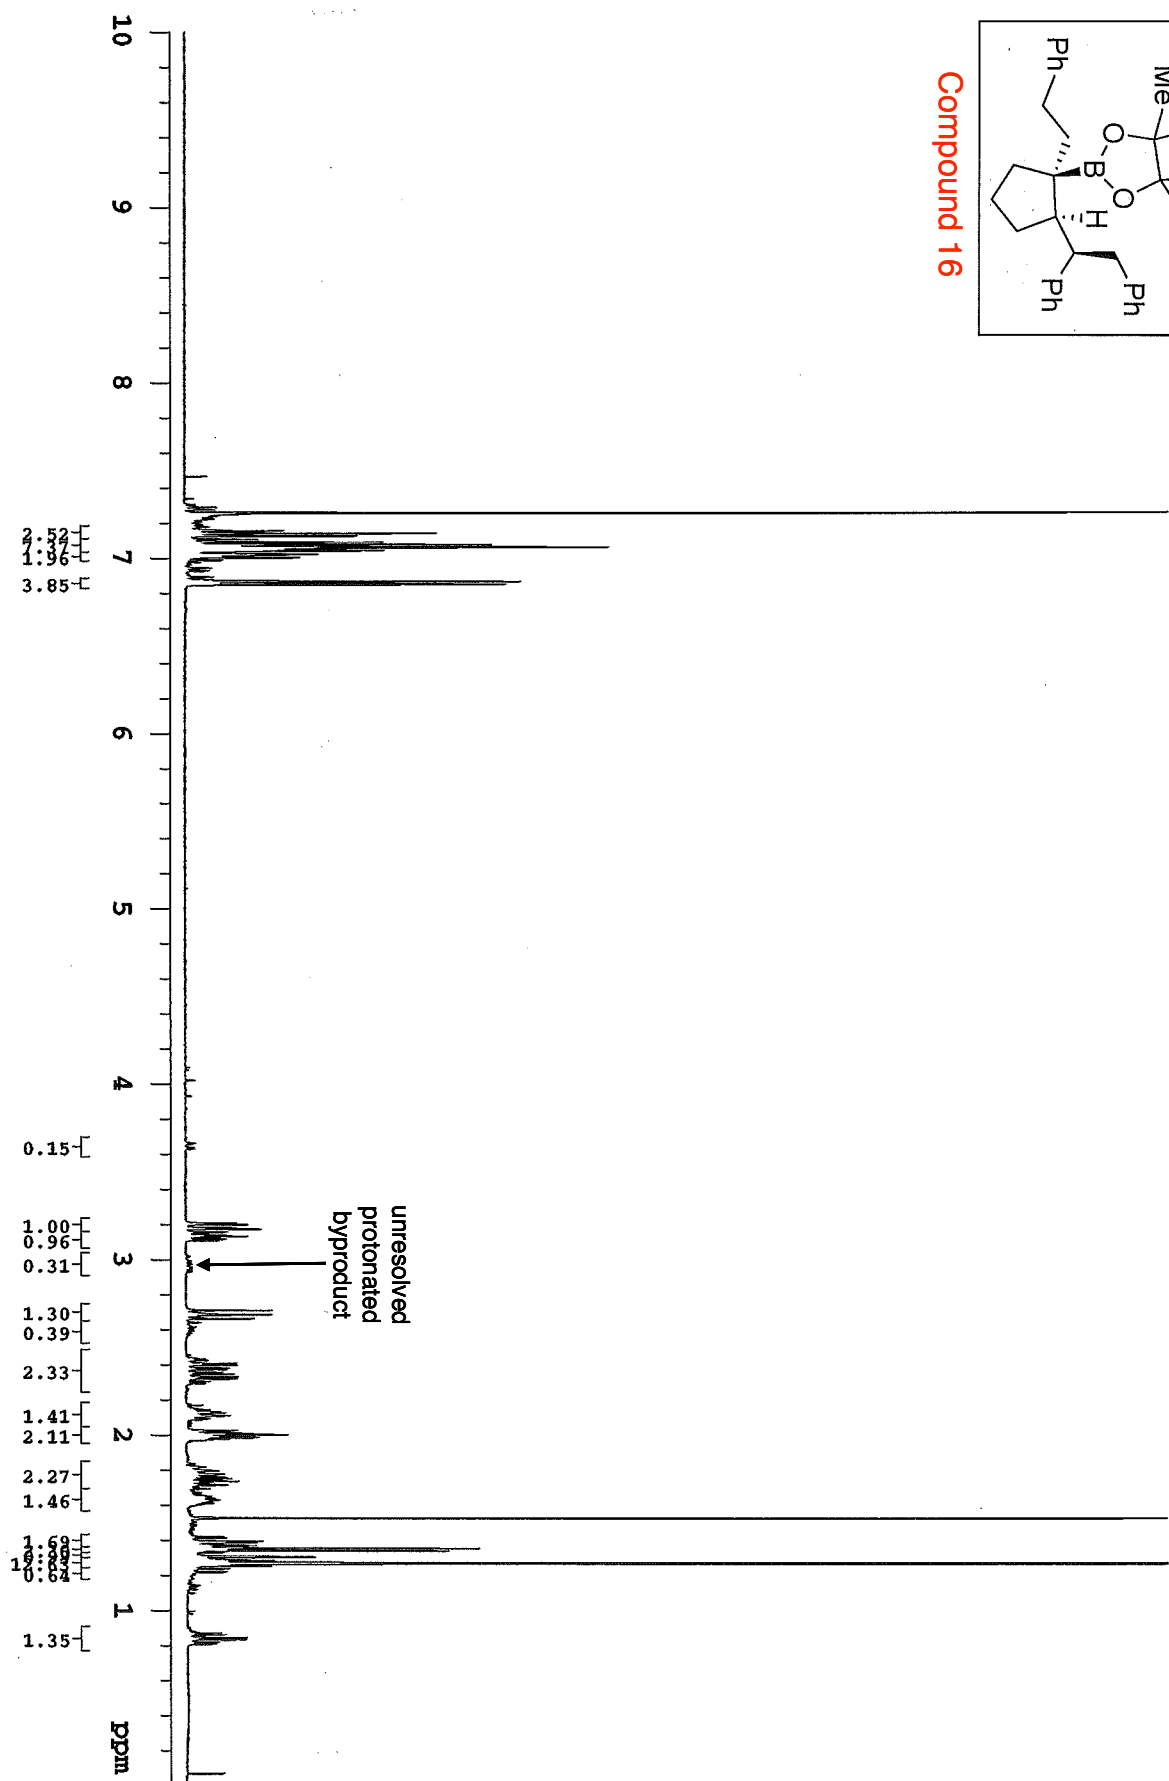

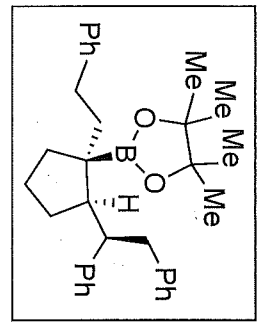

Compound 16

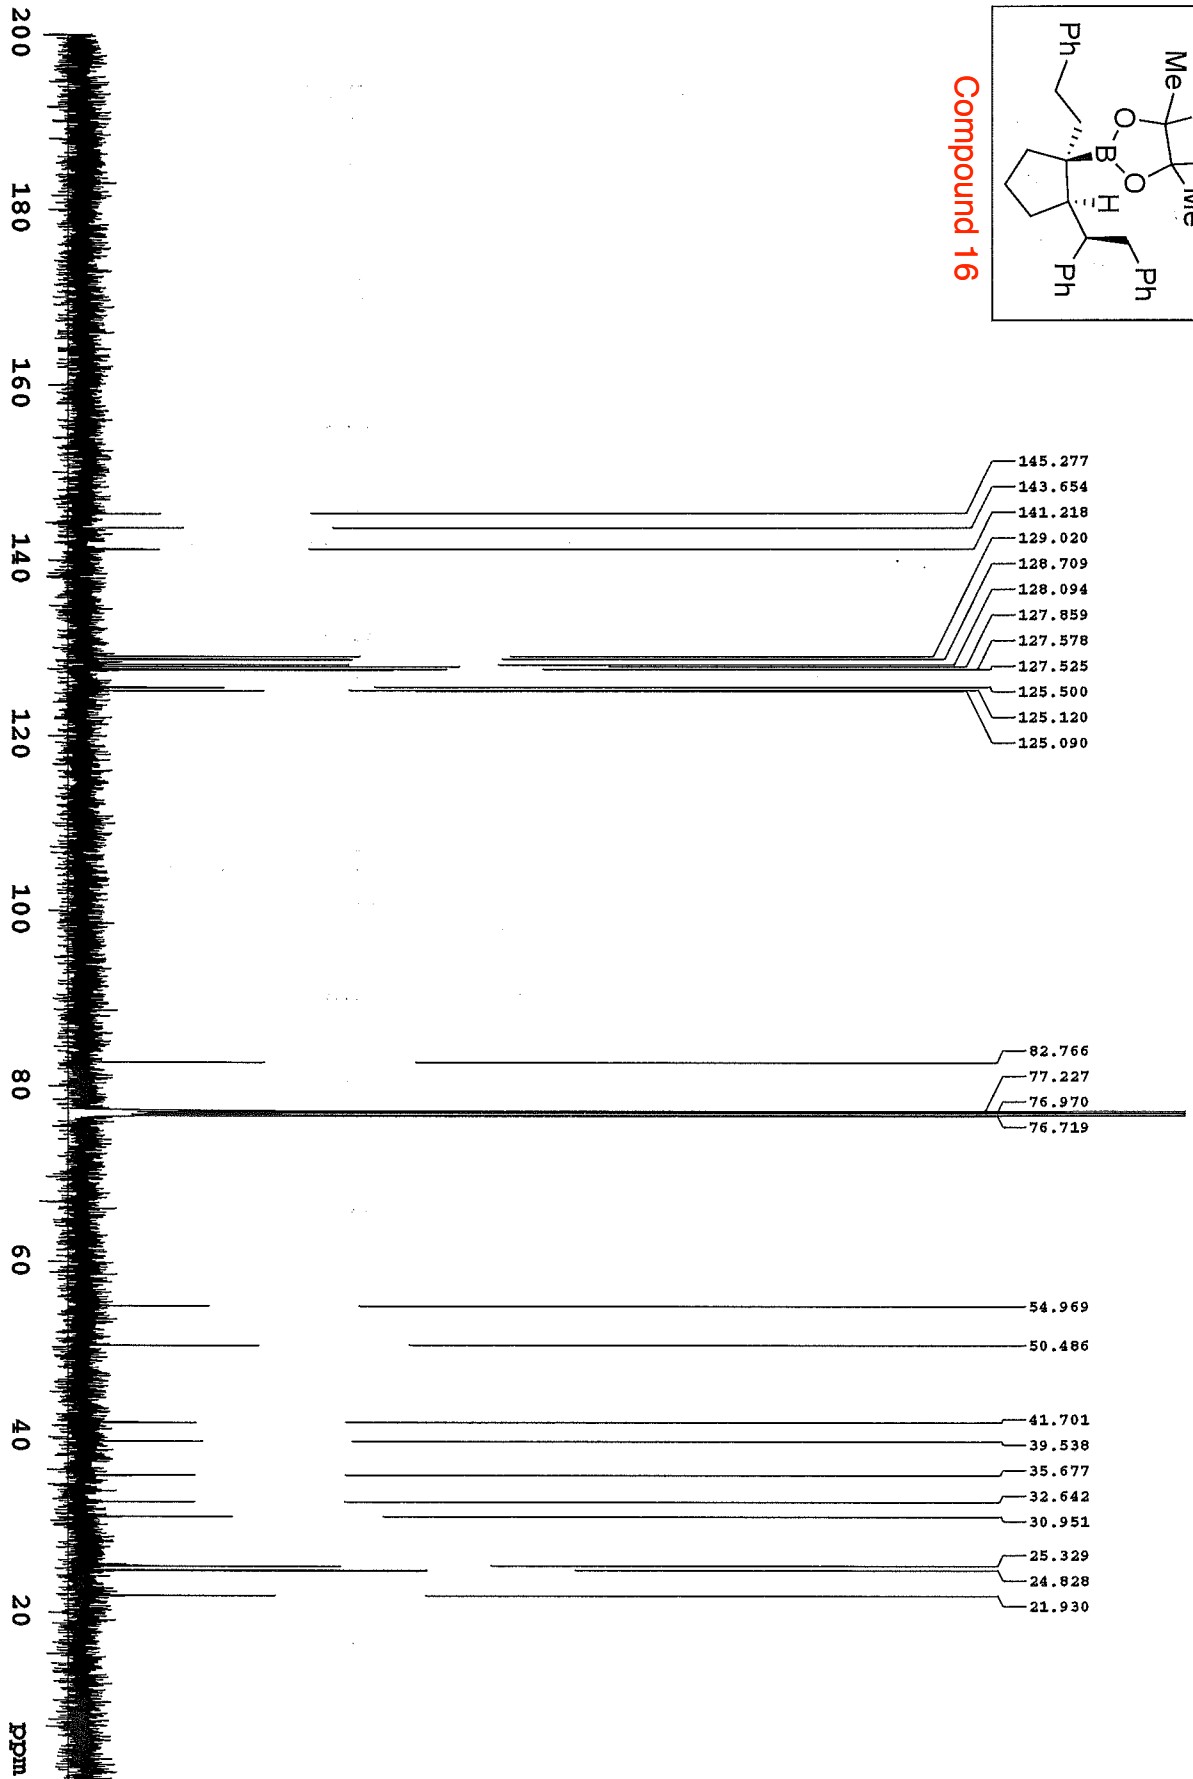

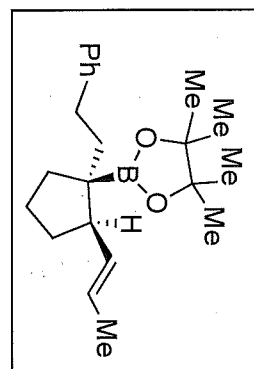

Compound 23

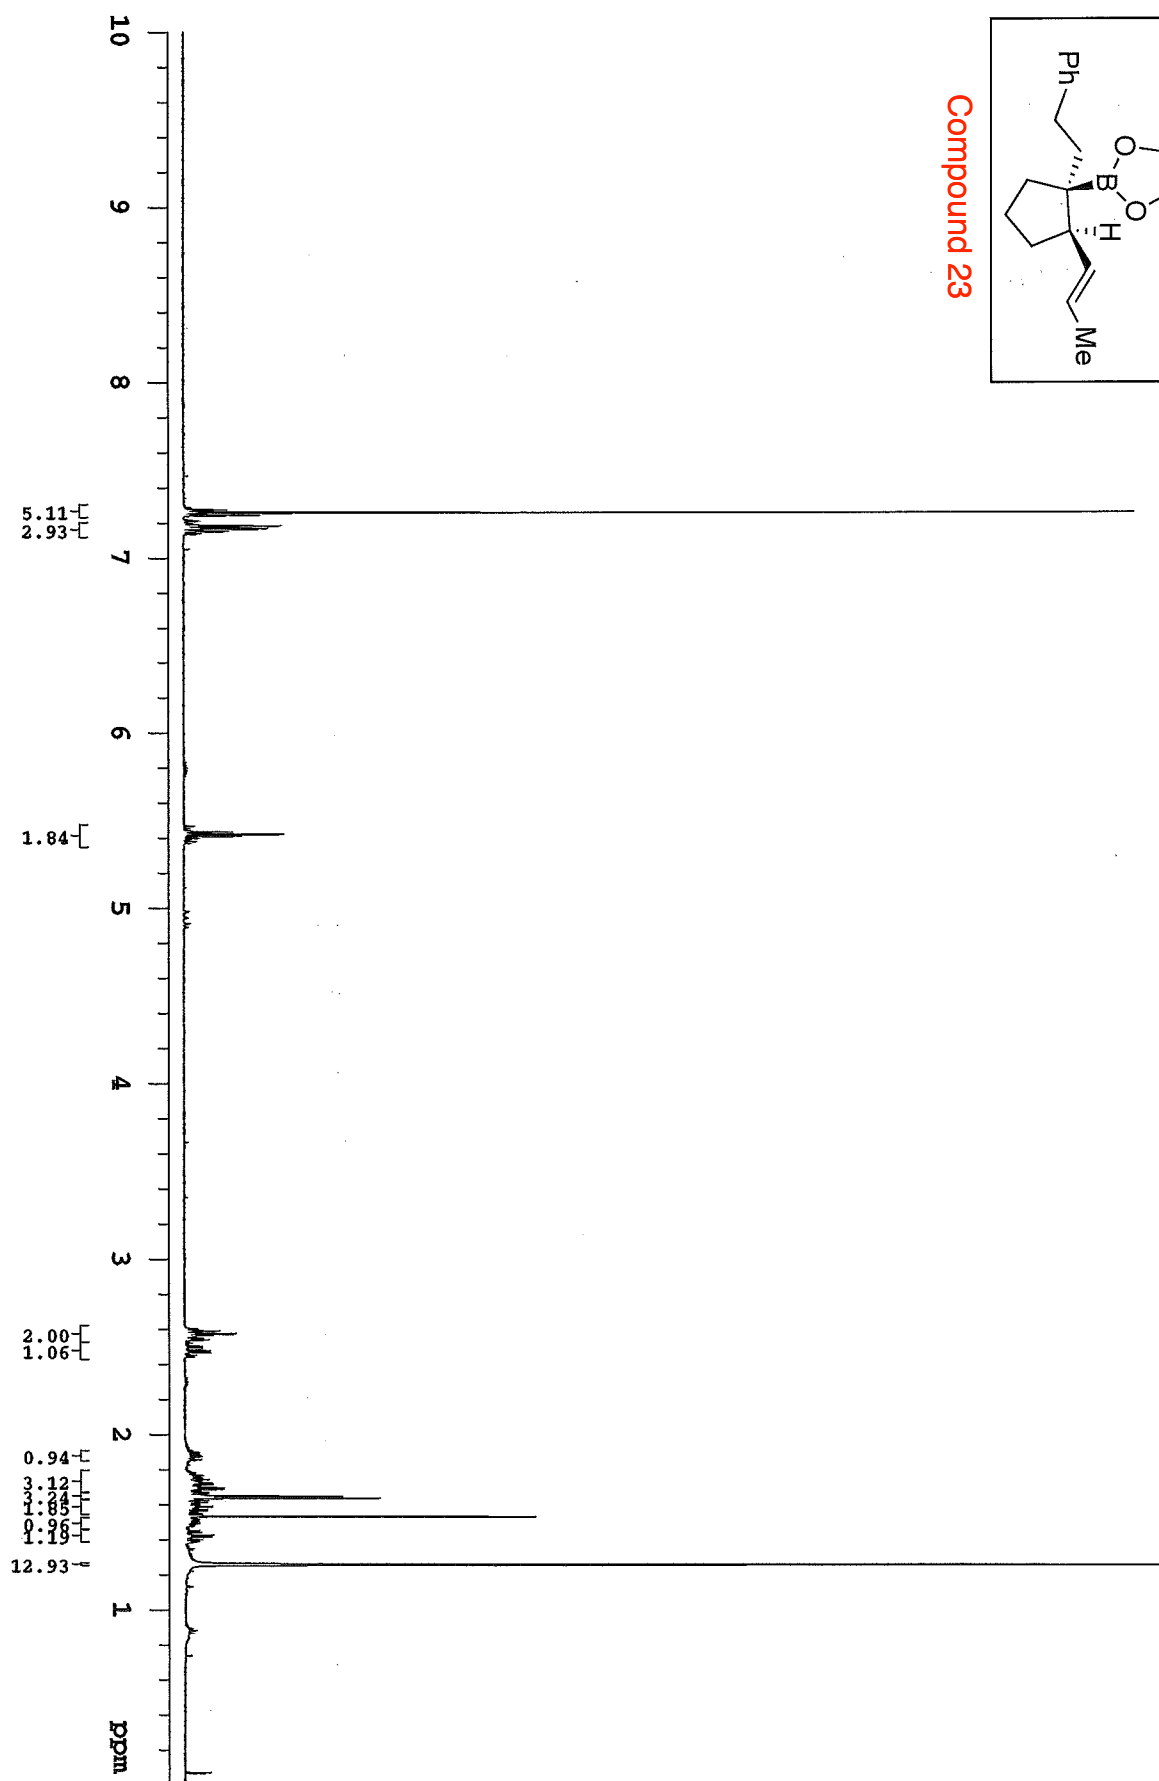

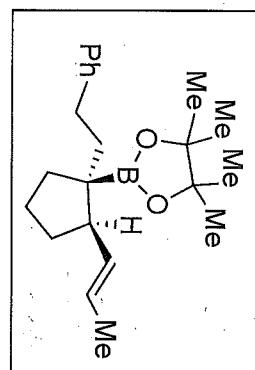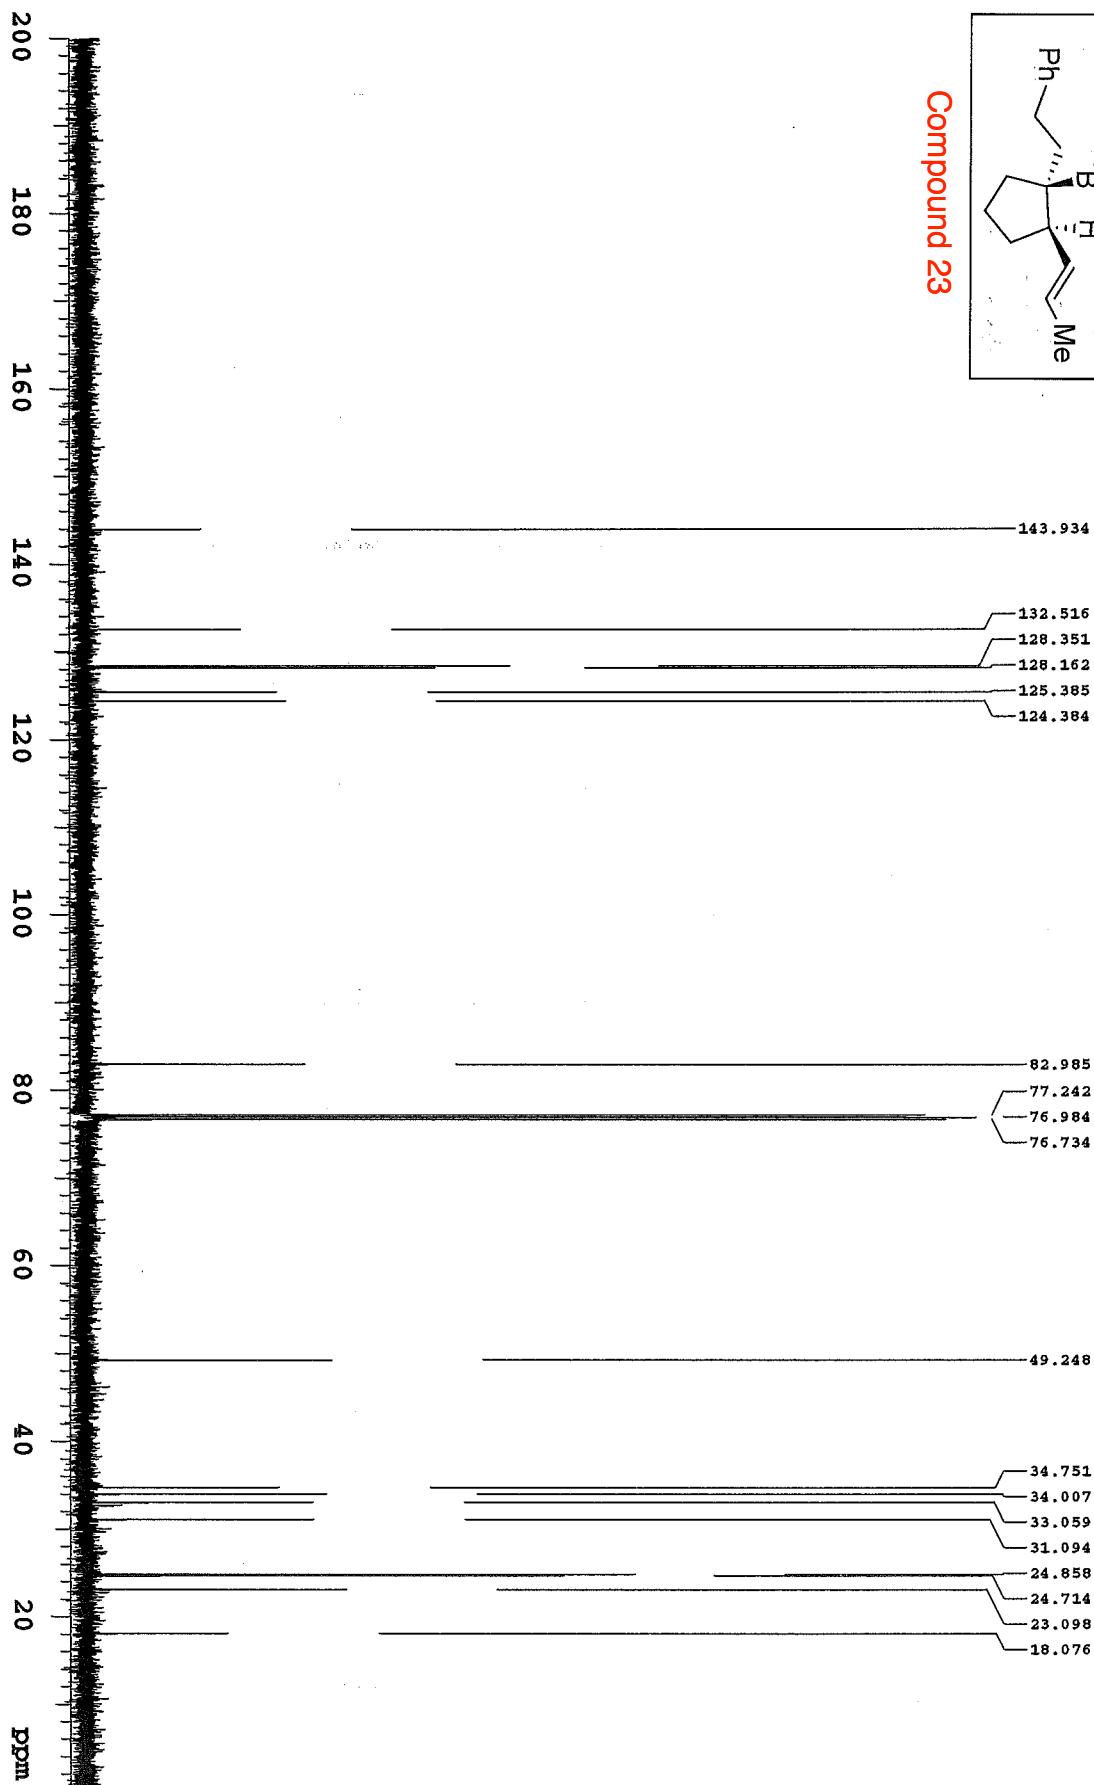

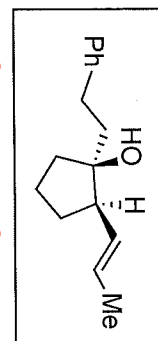

**Compound S33**

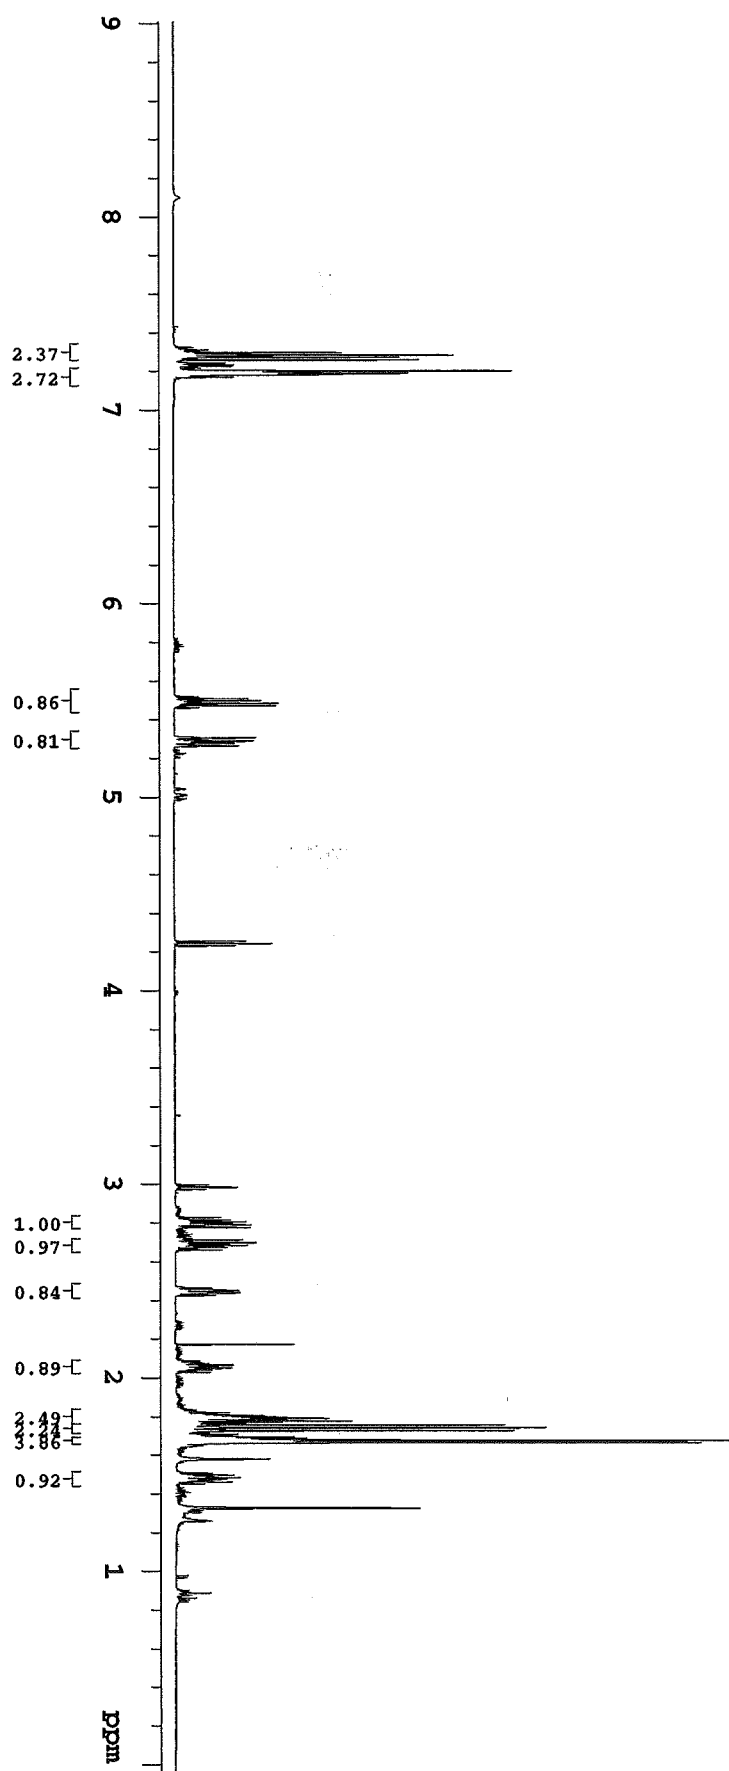



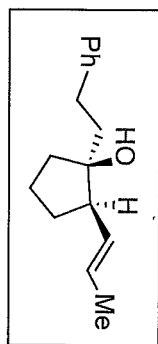

**Compound S33**

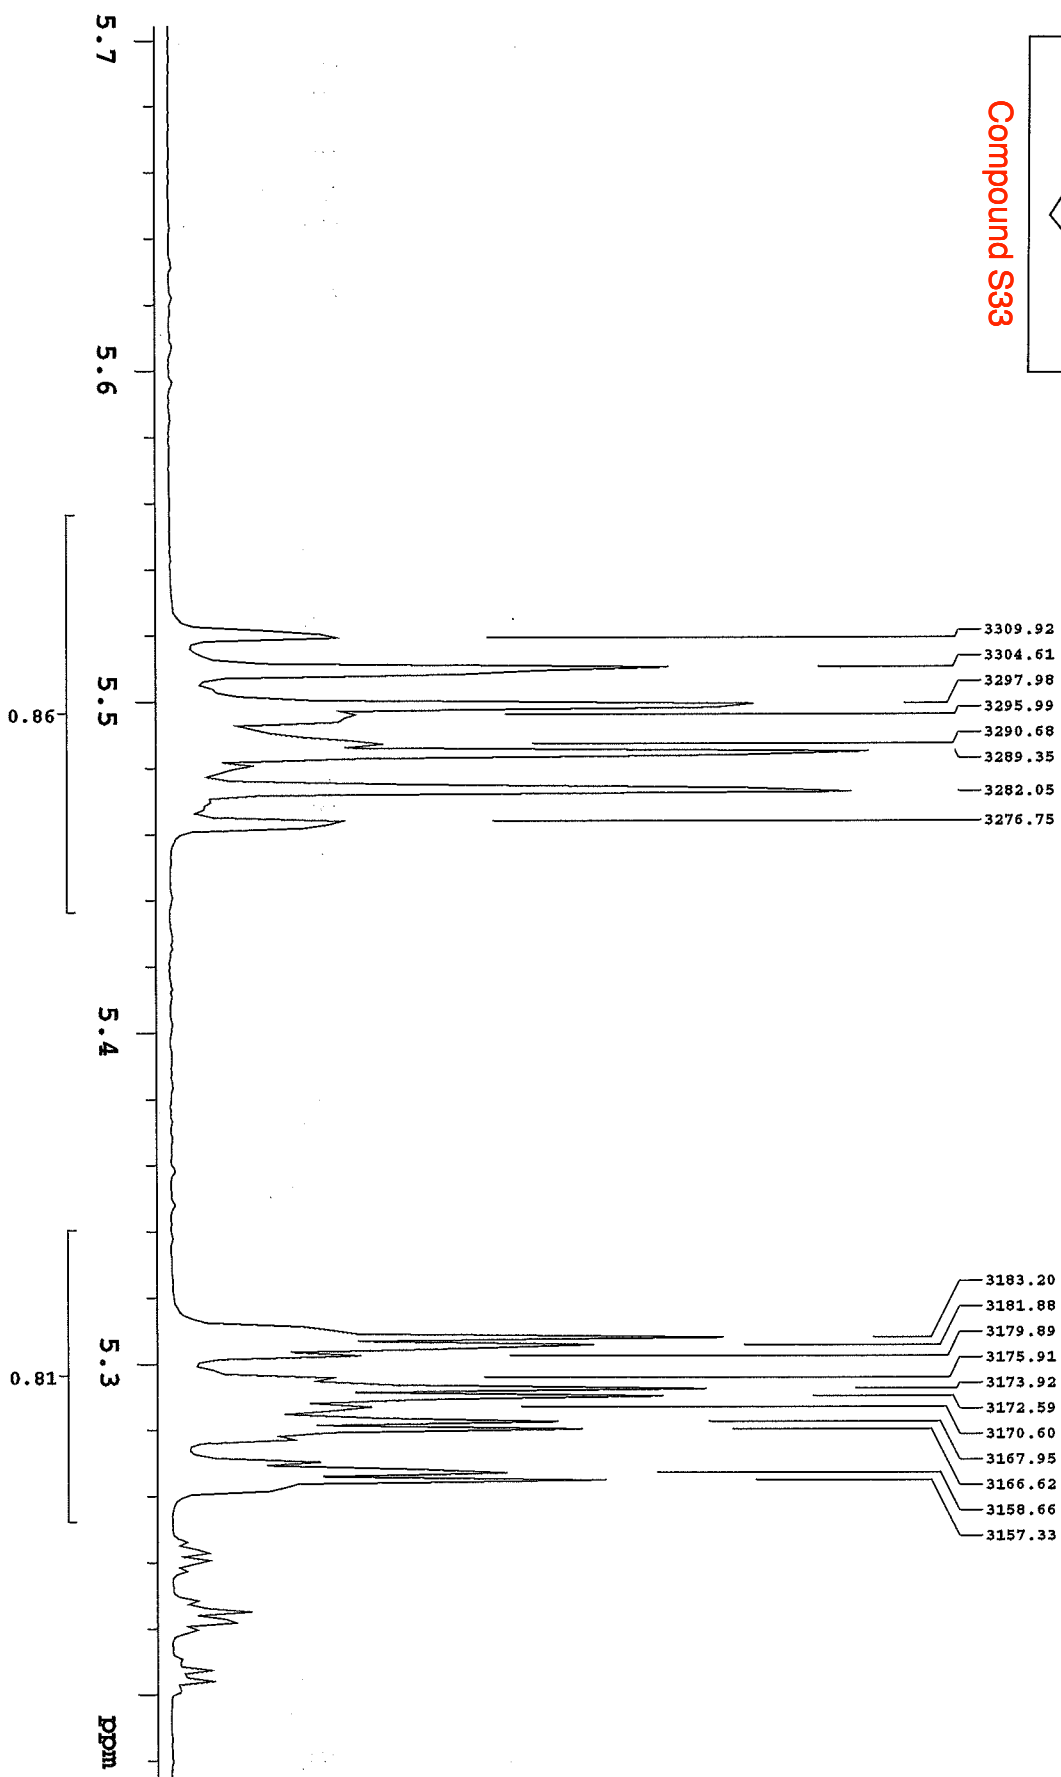

Compound S33

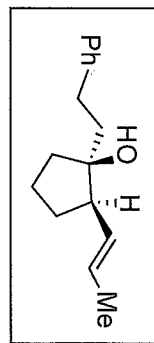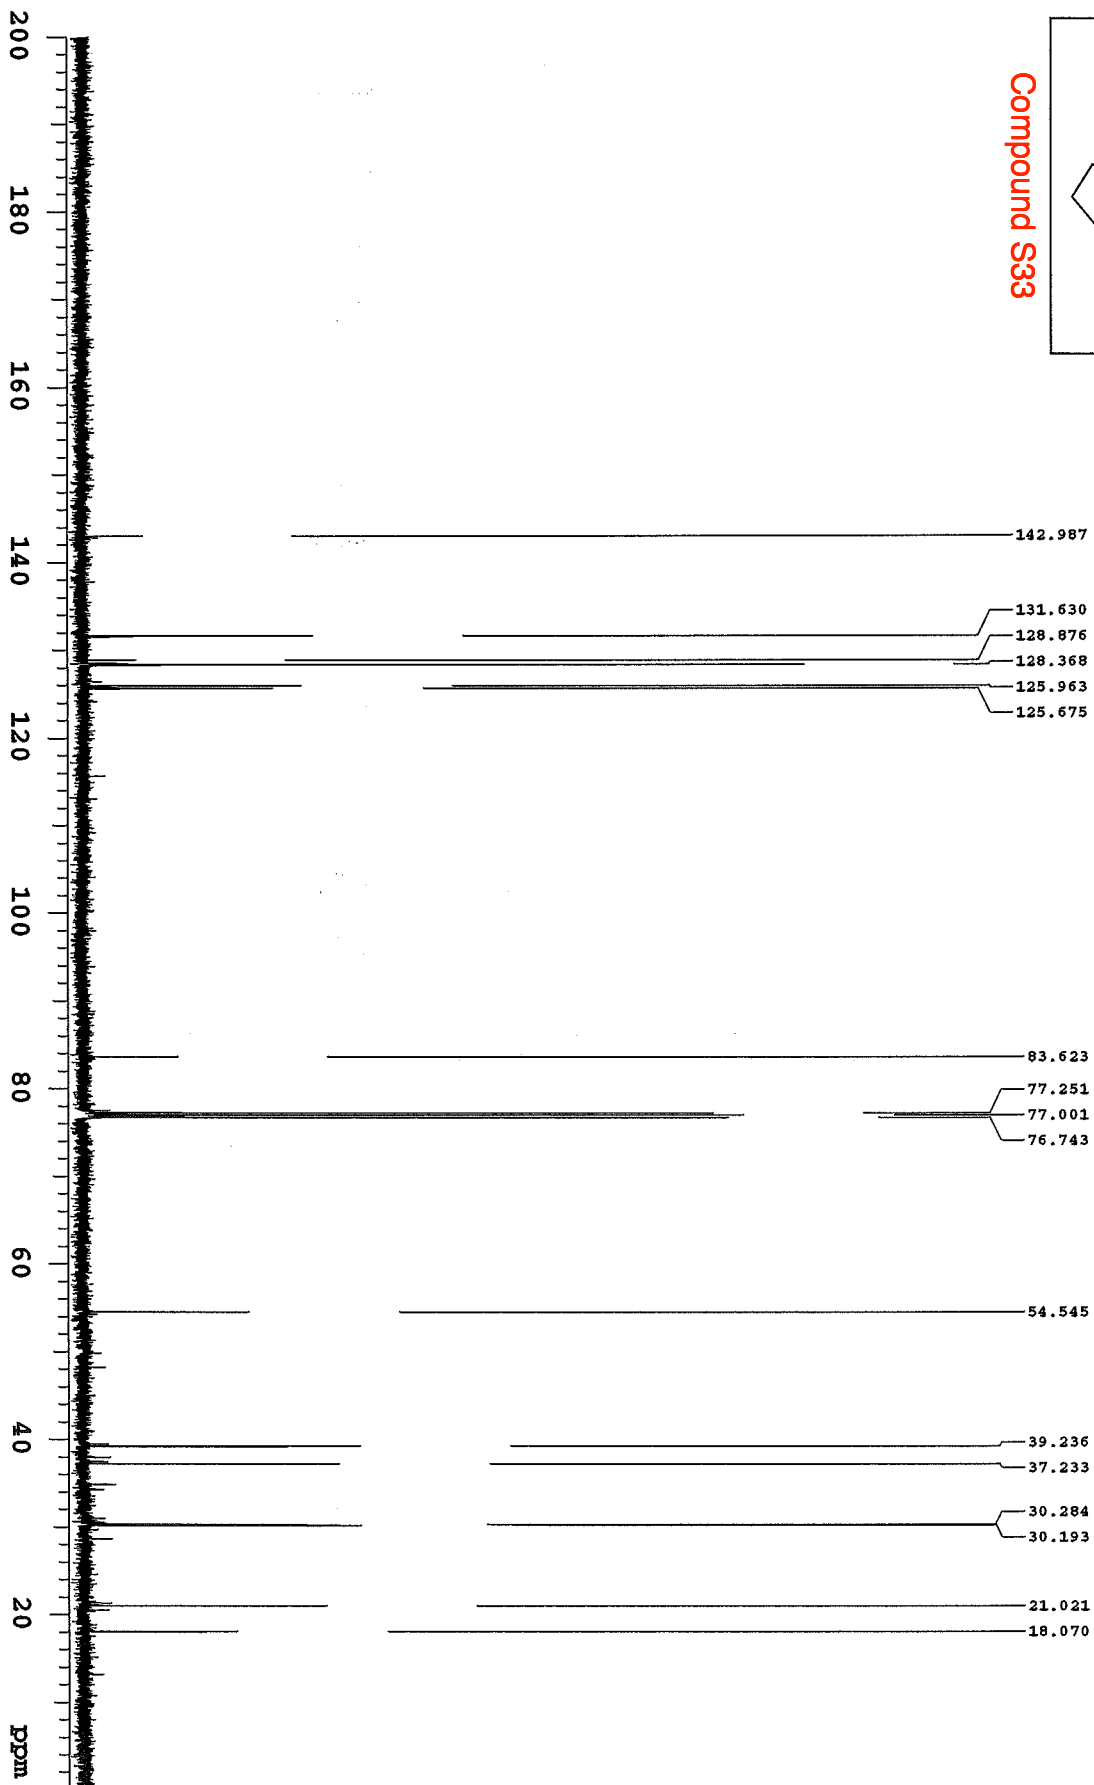

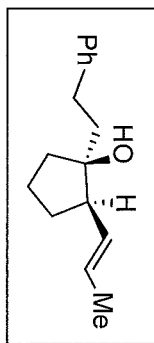

Compound S33  
COSY

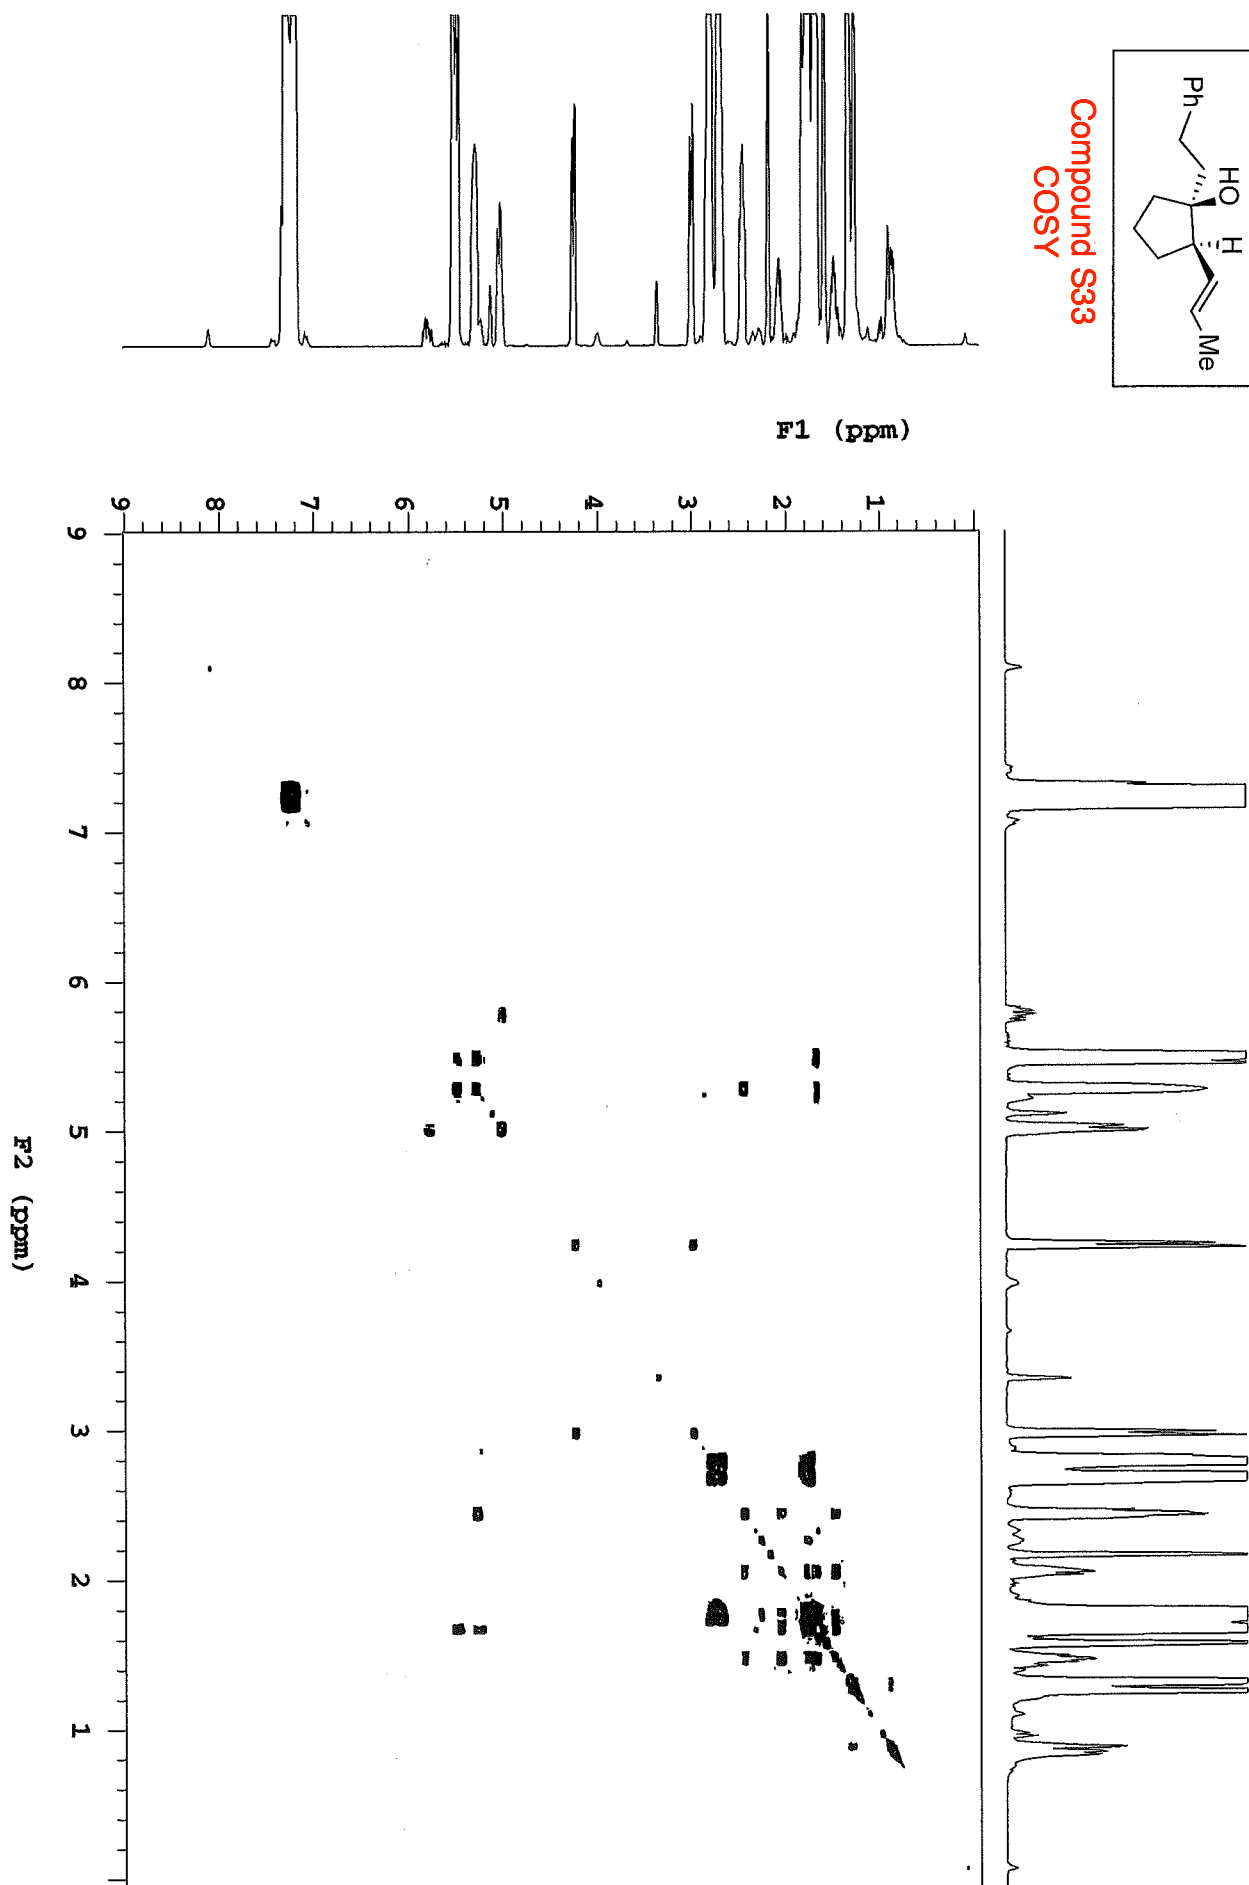

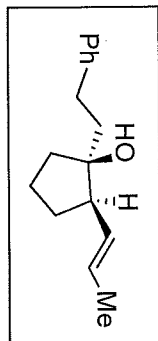

Compound S33  
NOESY

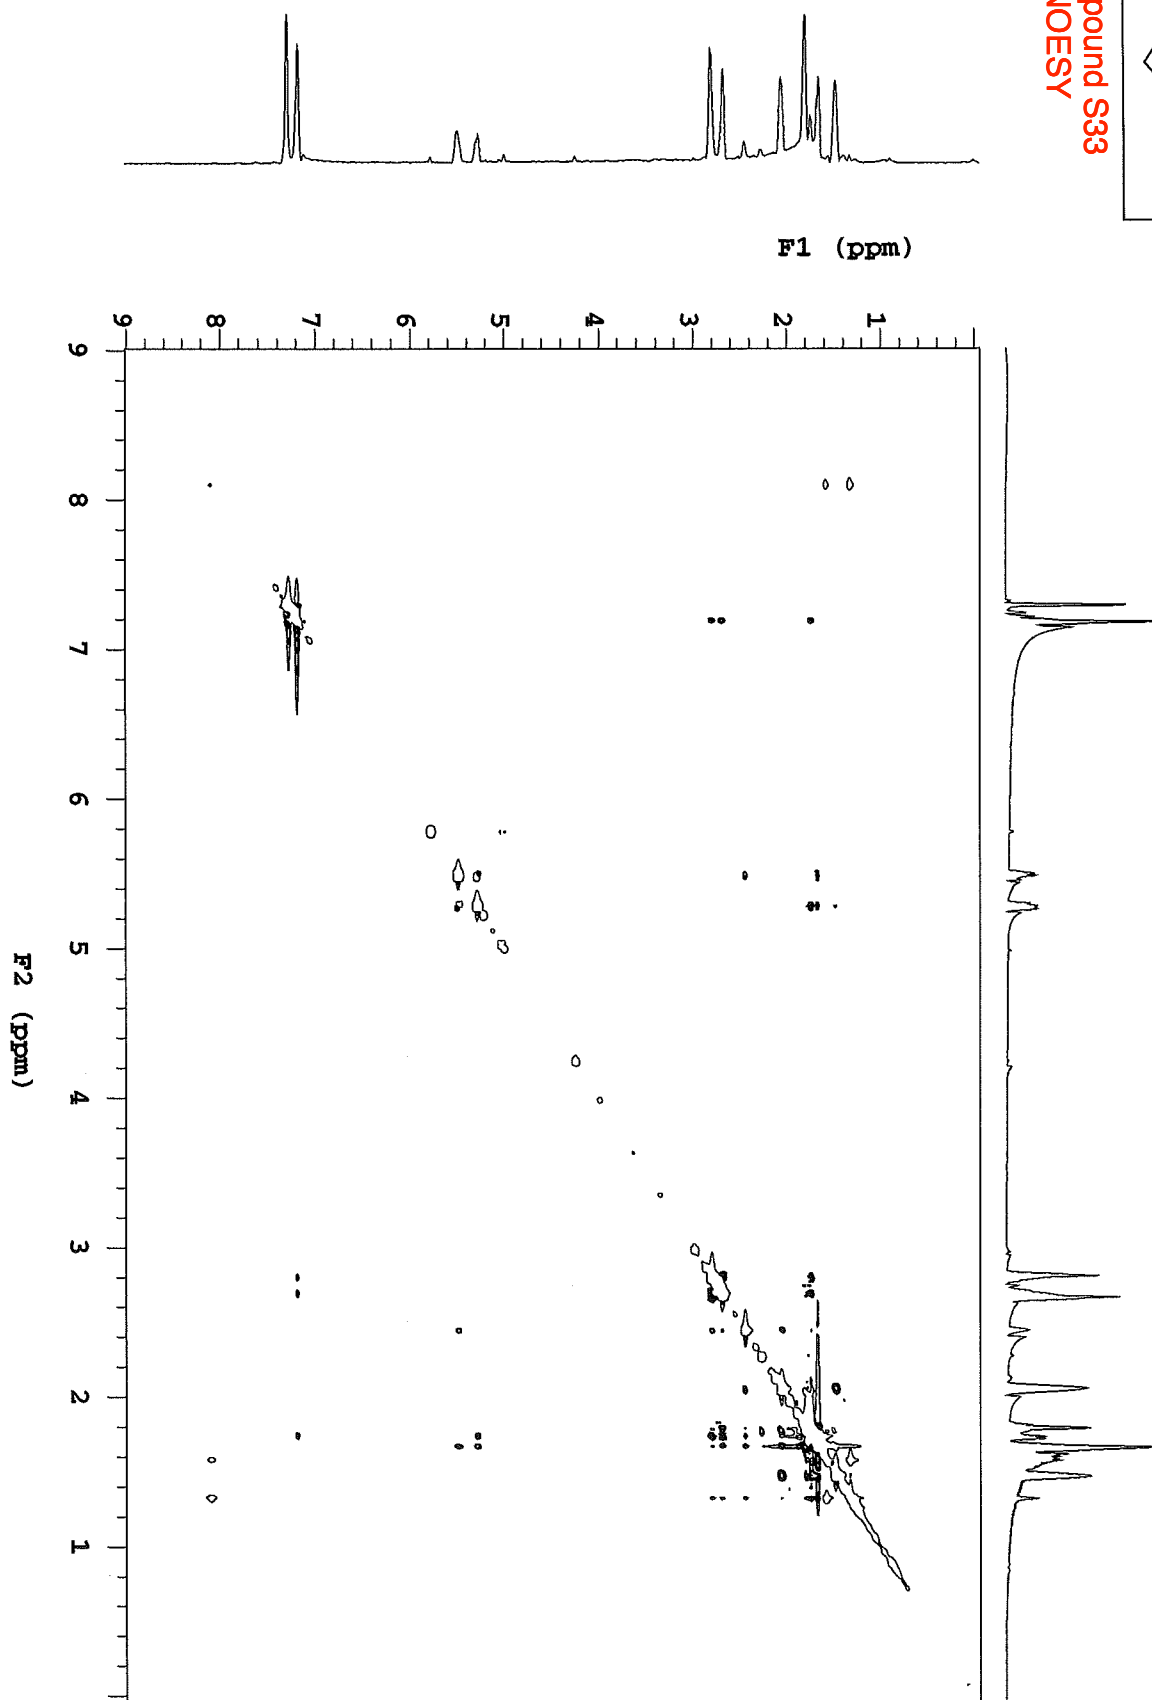

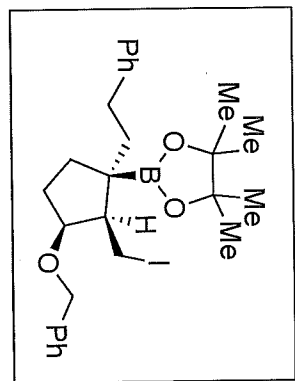

Compound 14

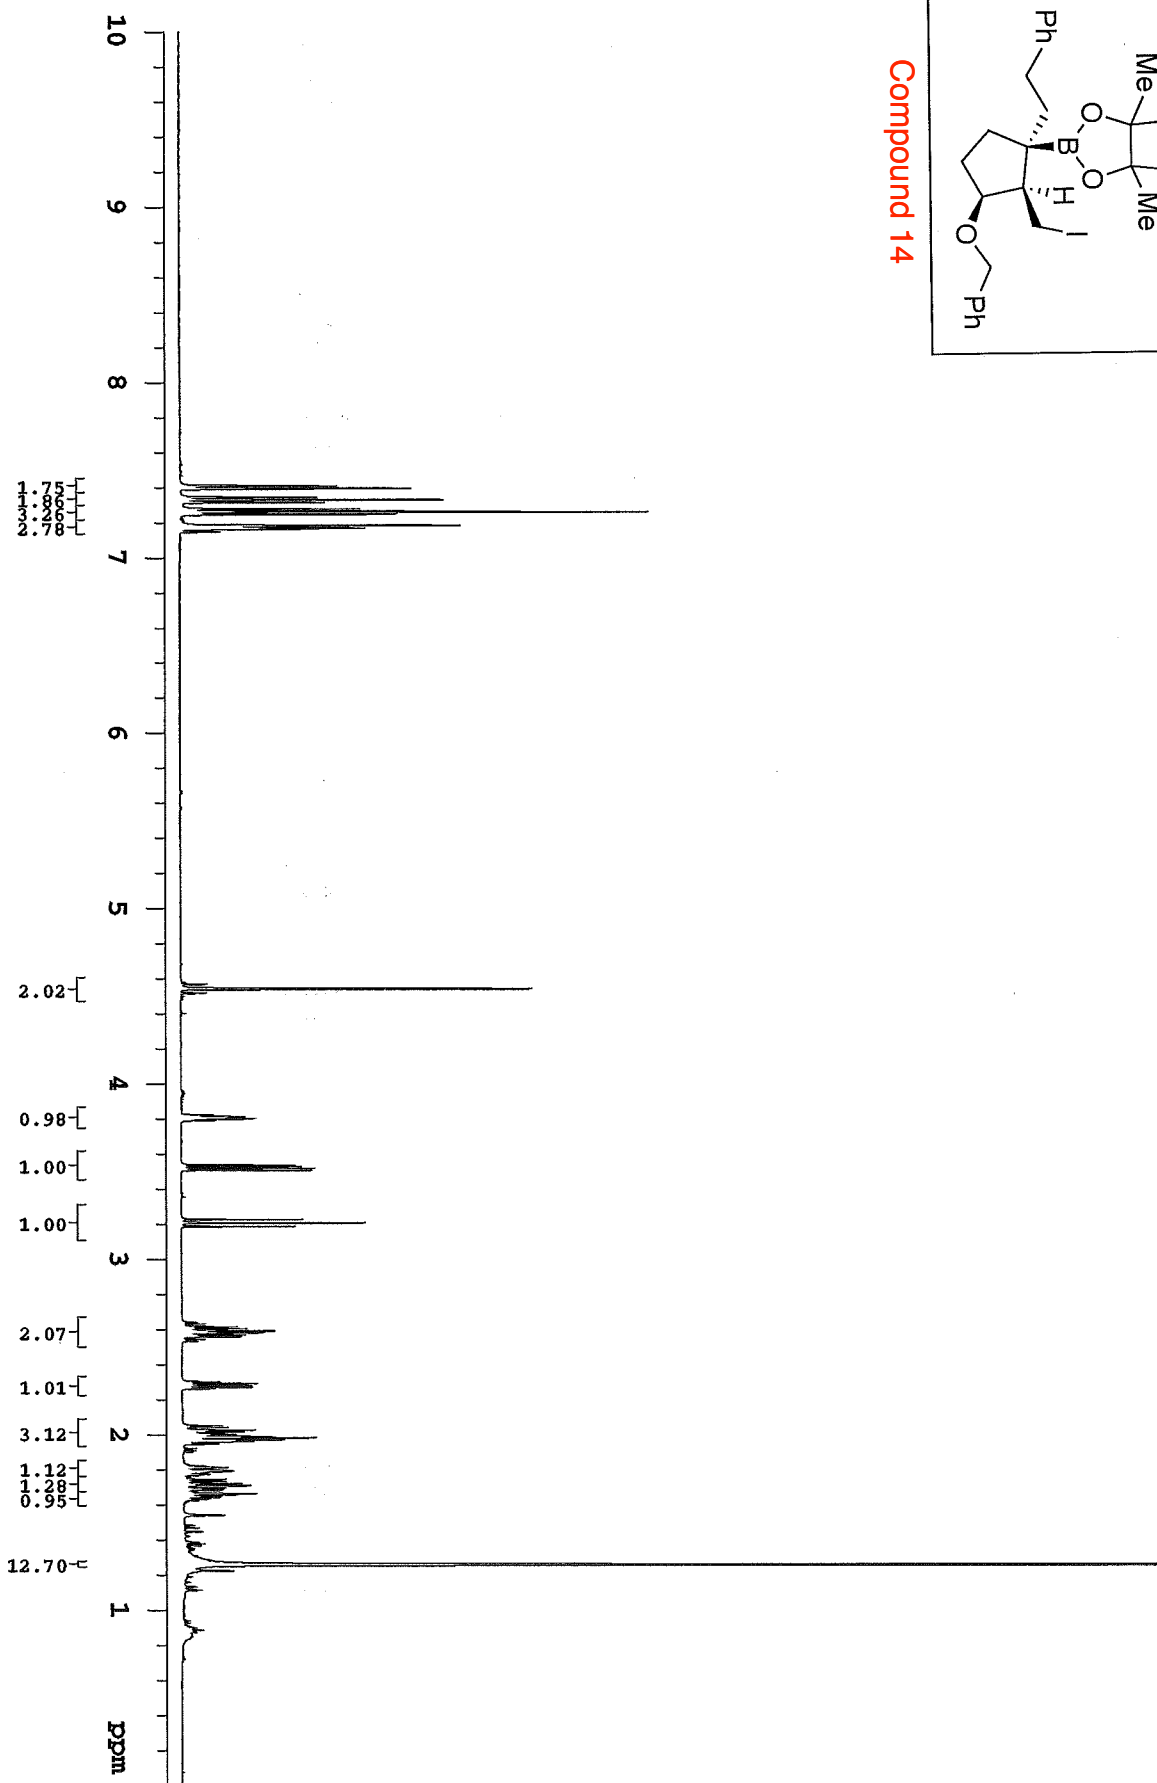

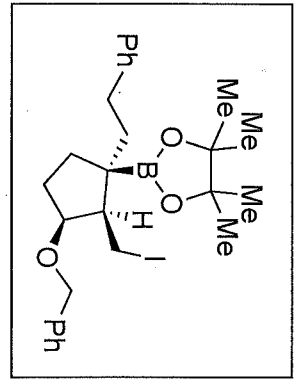

Compound 14

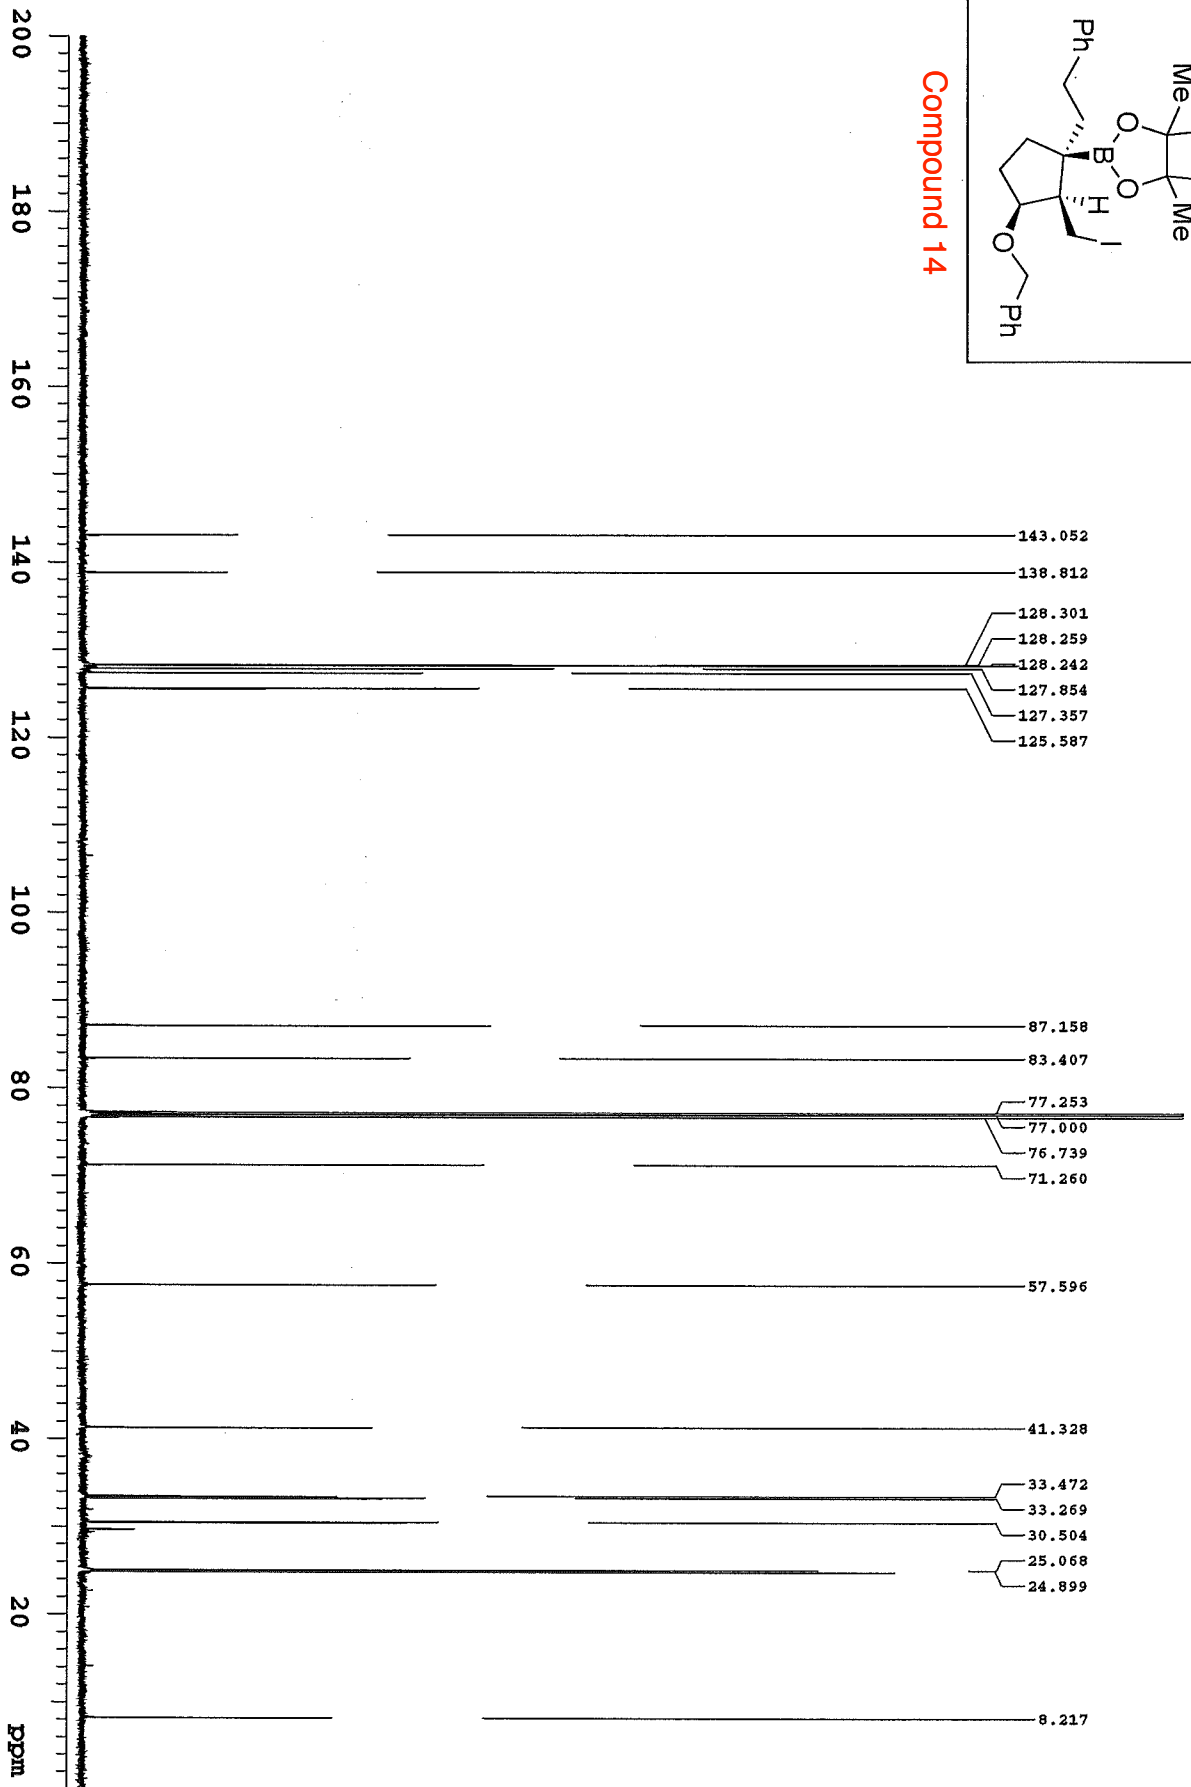

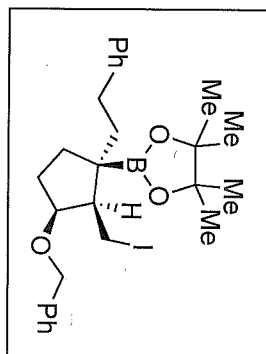

Compound 14  
COSY

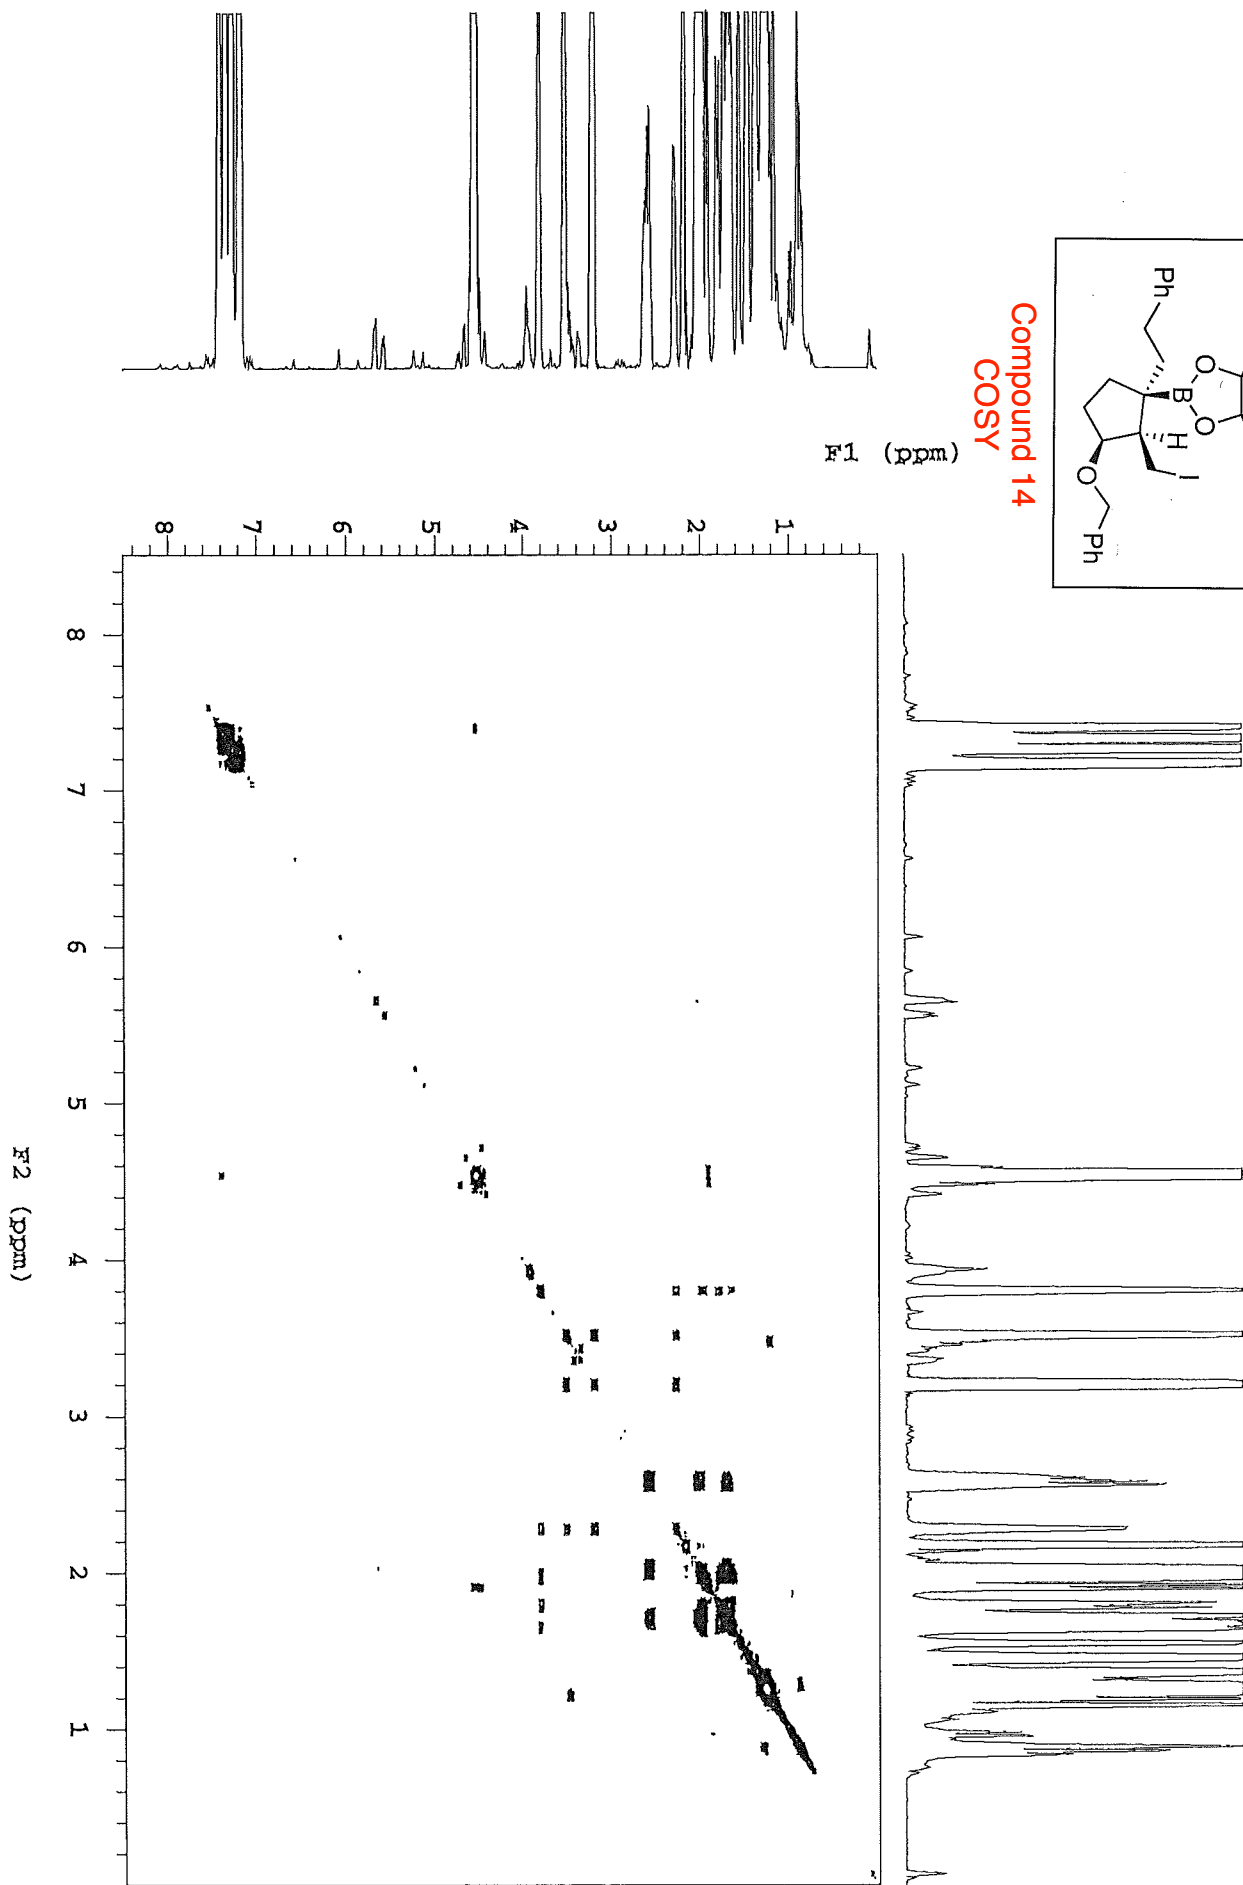

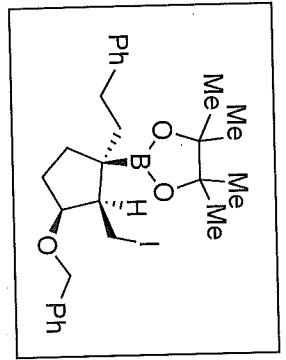

Compound 14  
NOESY

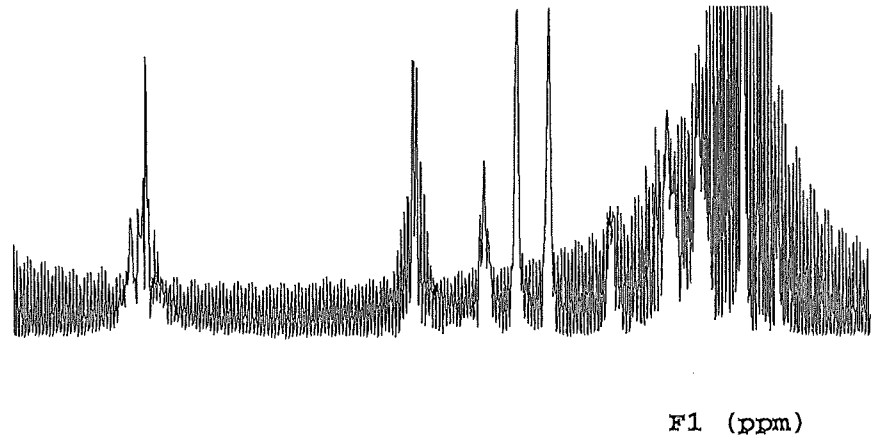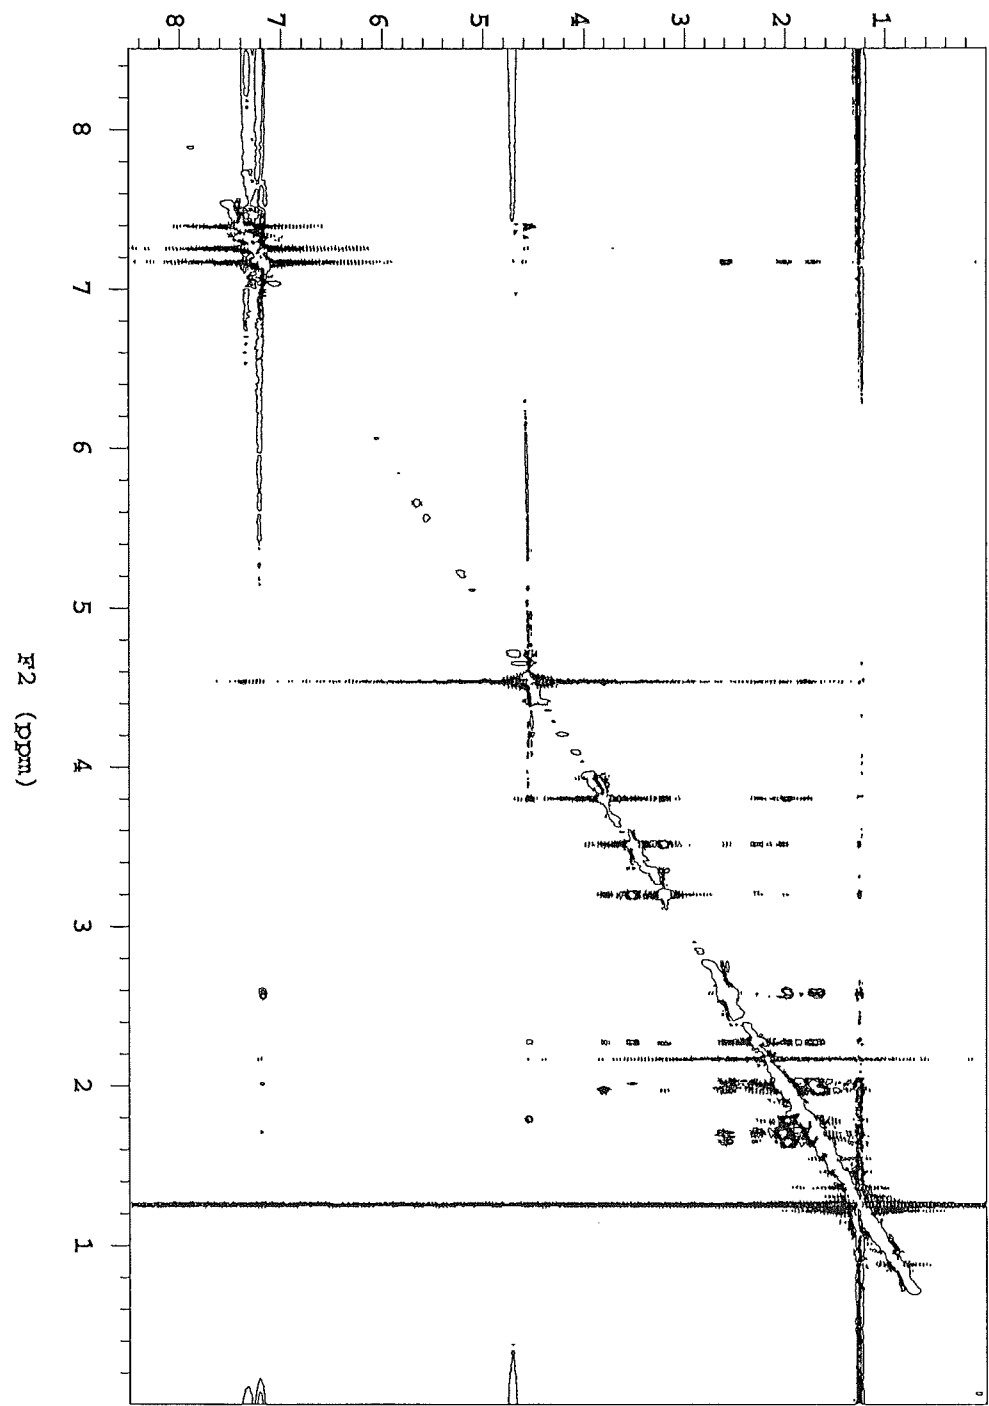



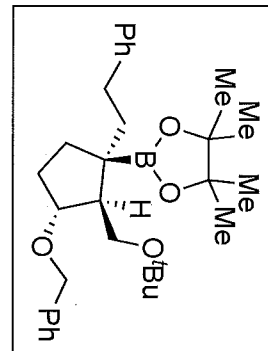

**Compound S13**

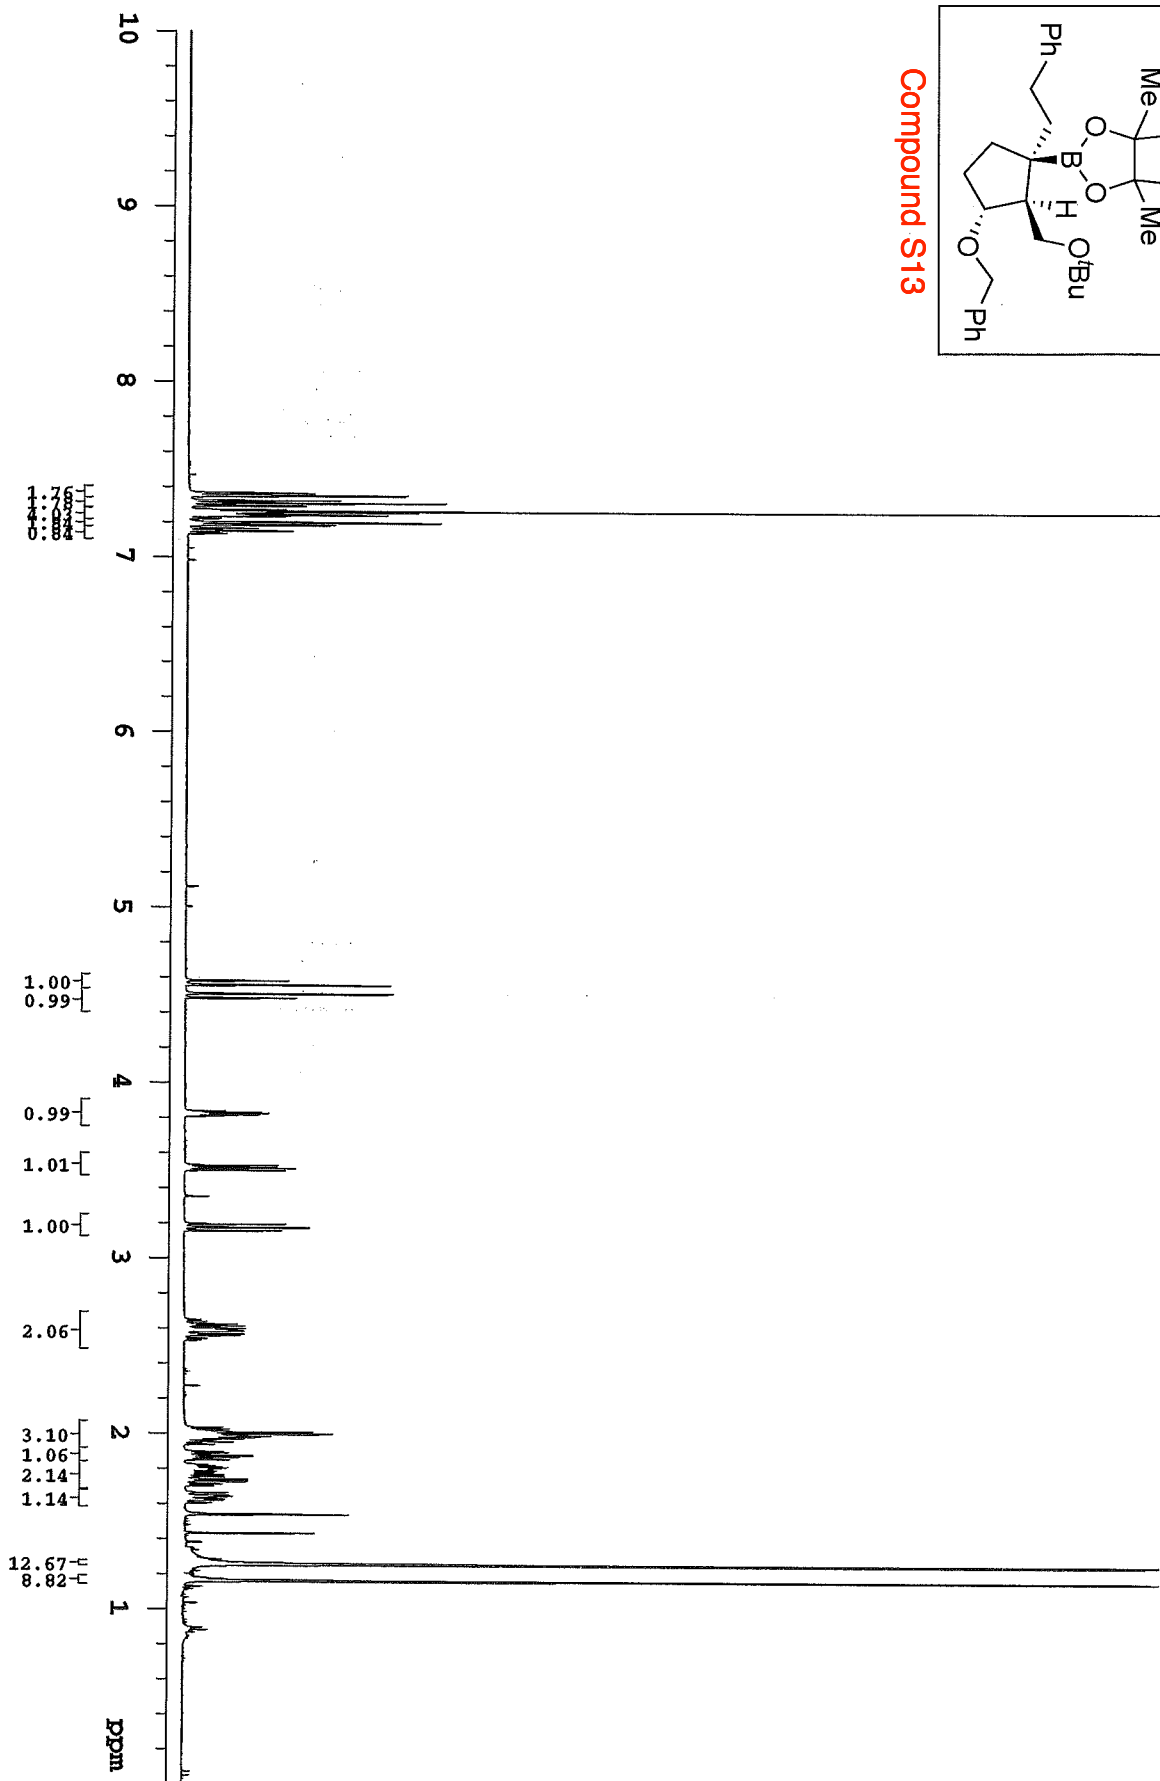

Compound S13

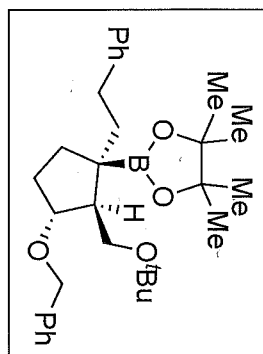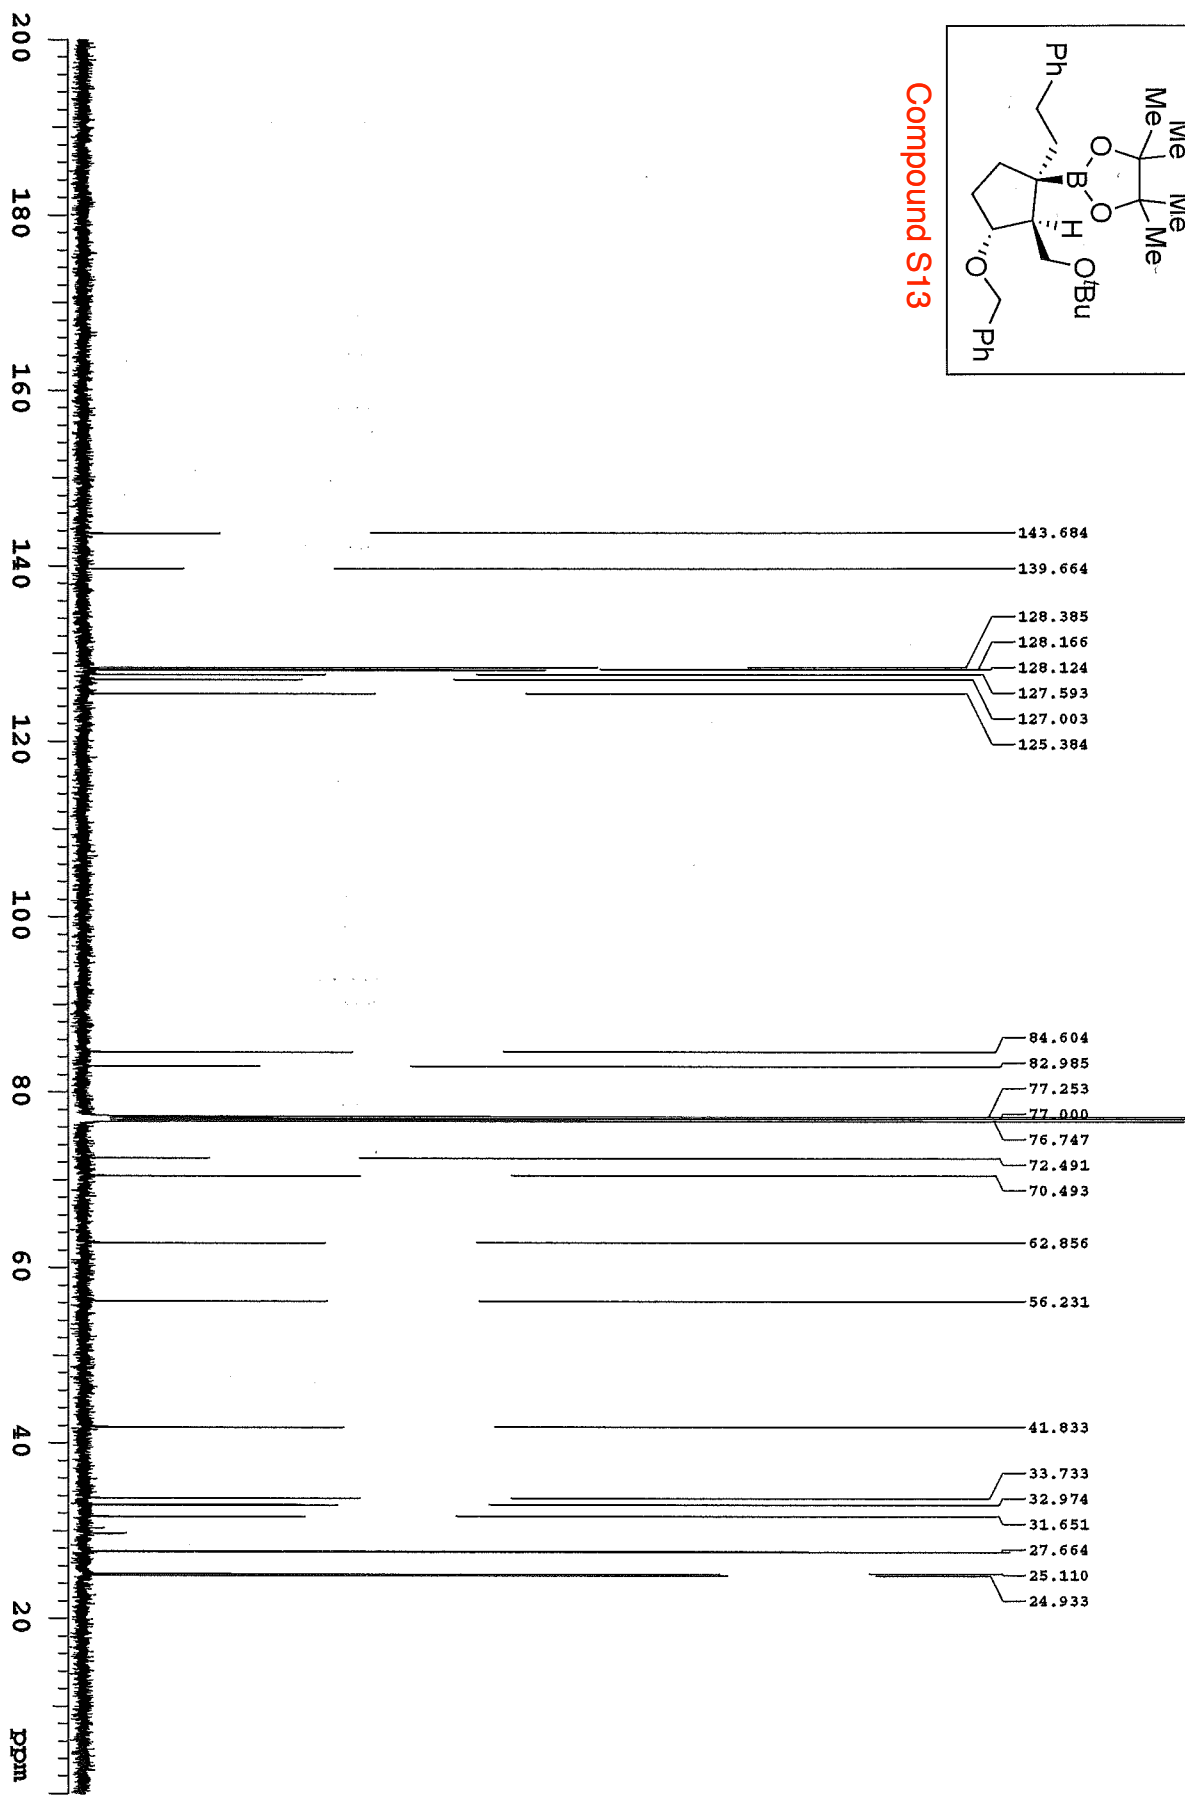

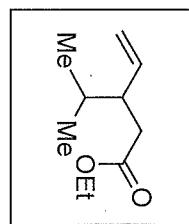

Compound S14

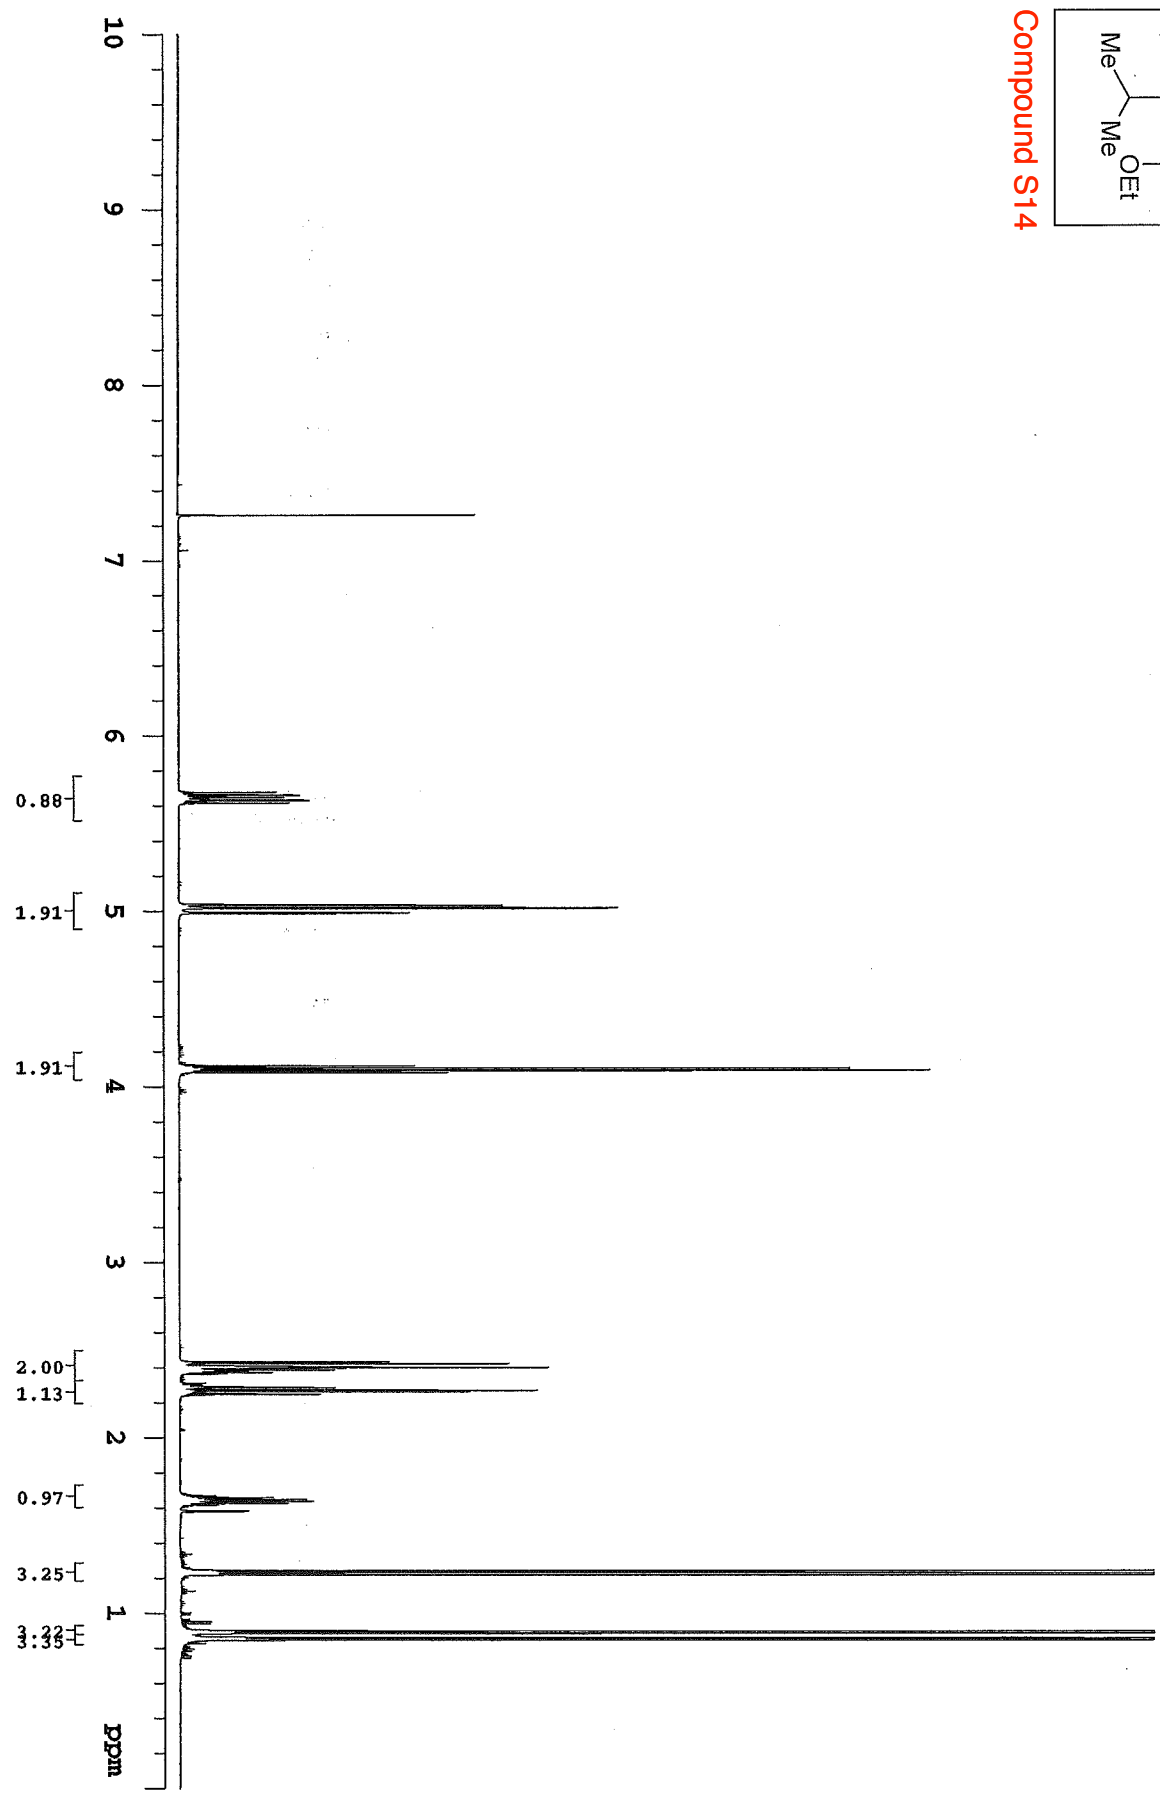

Compound S14

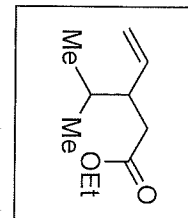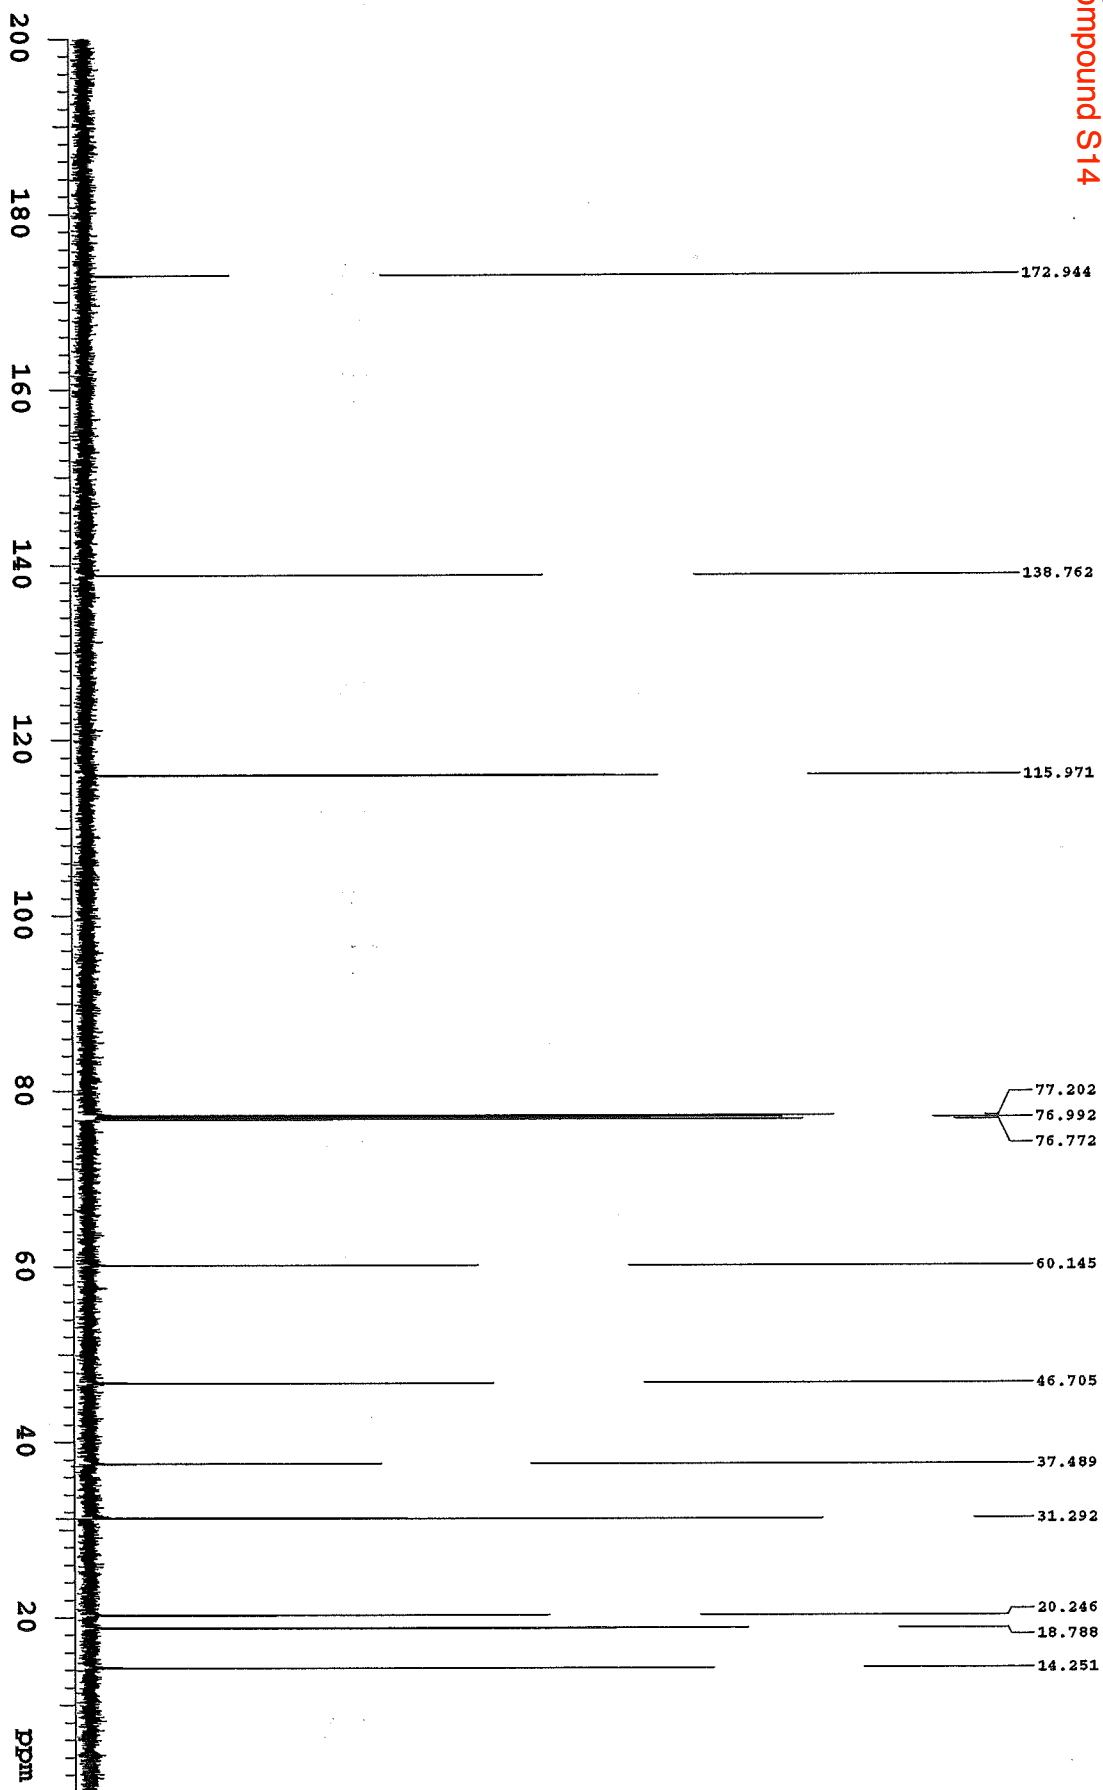

Compound S15

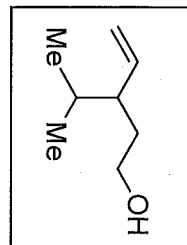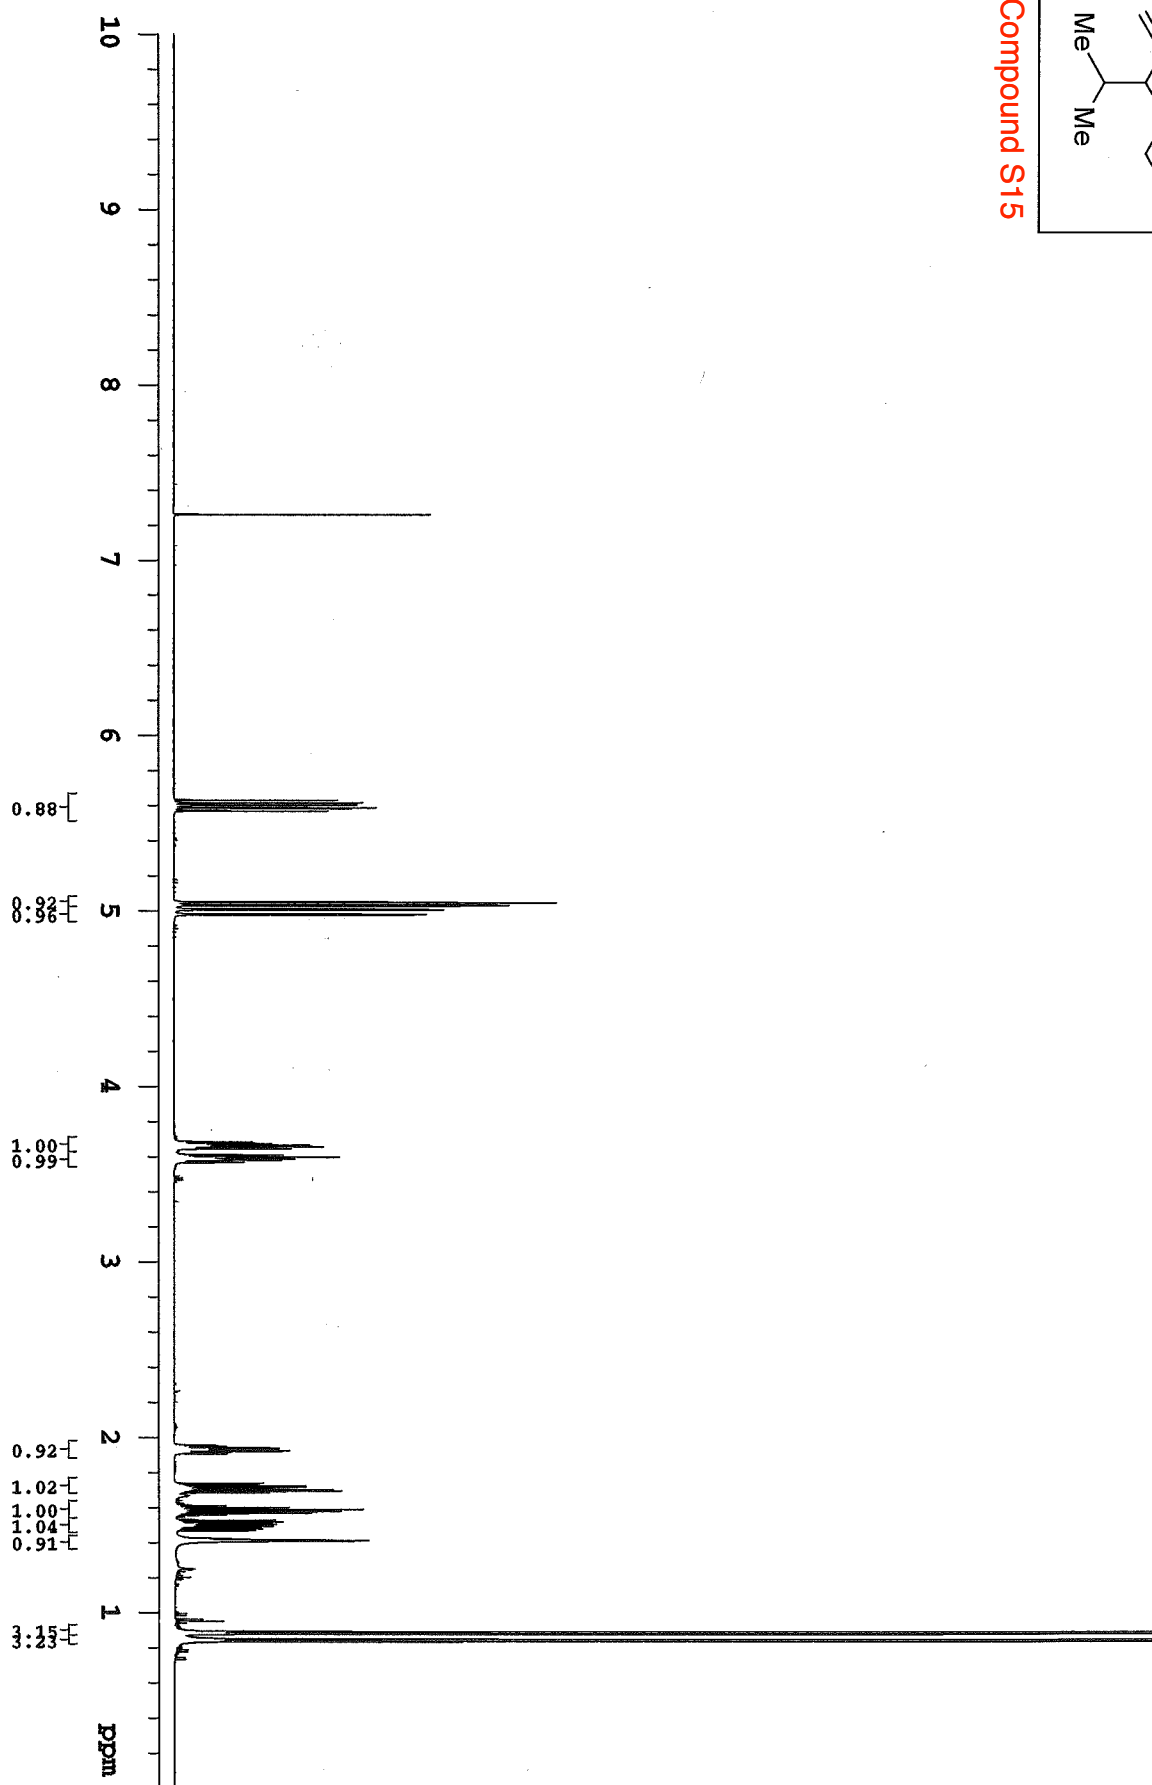

Compound S15

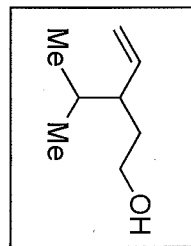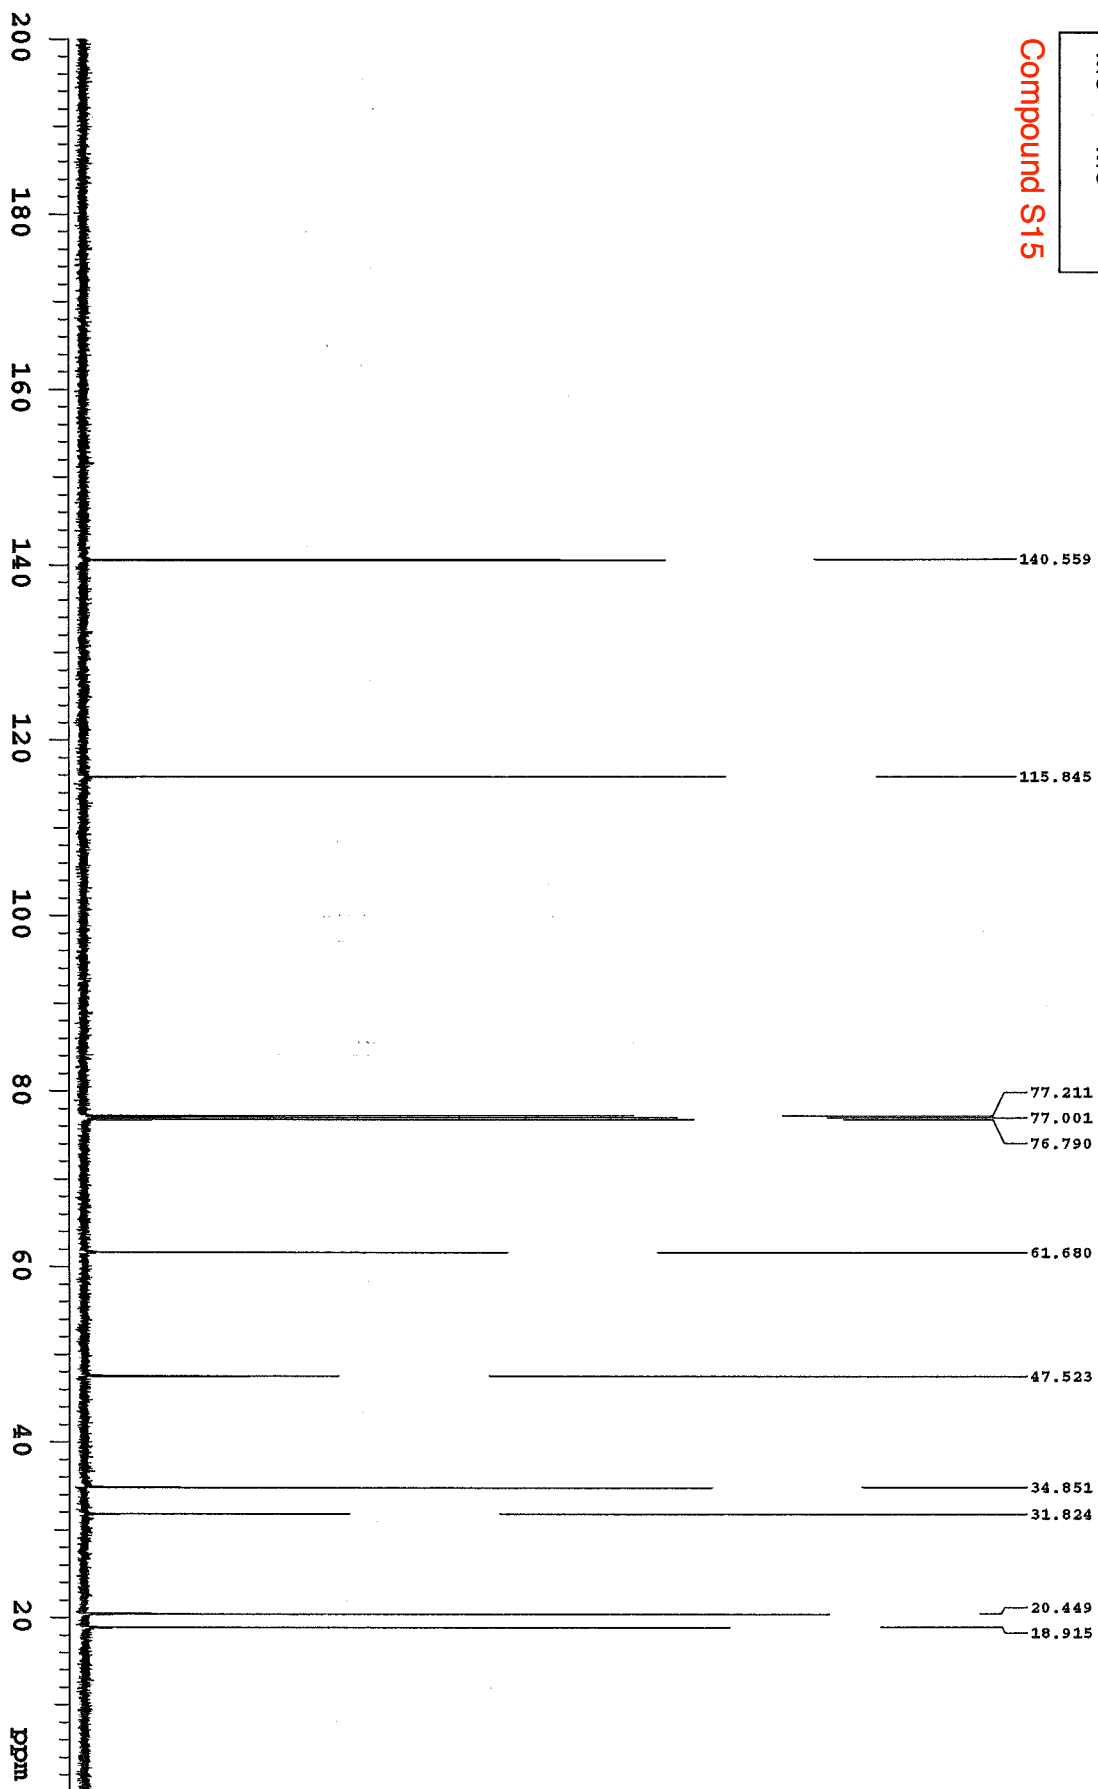

Compound S16

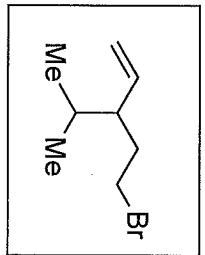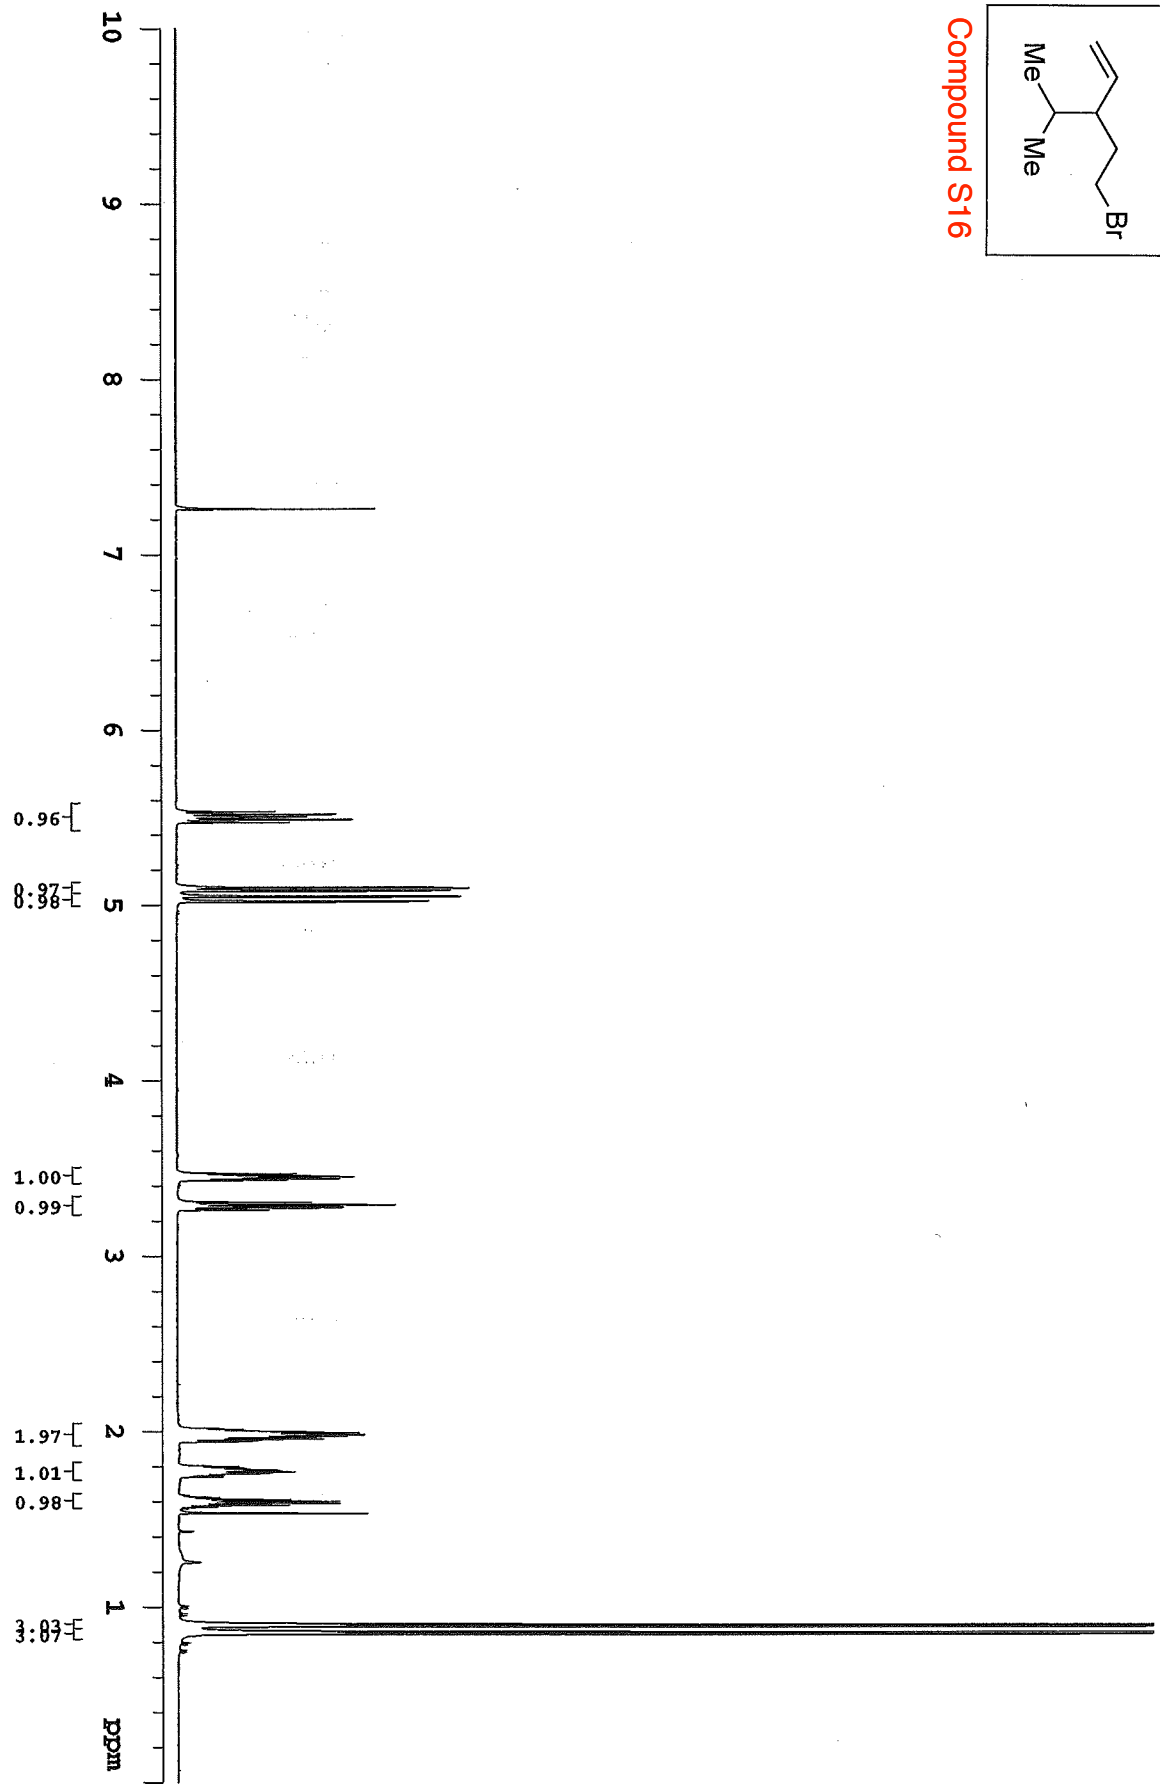

Compound S16

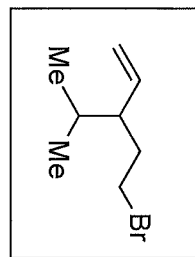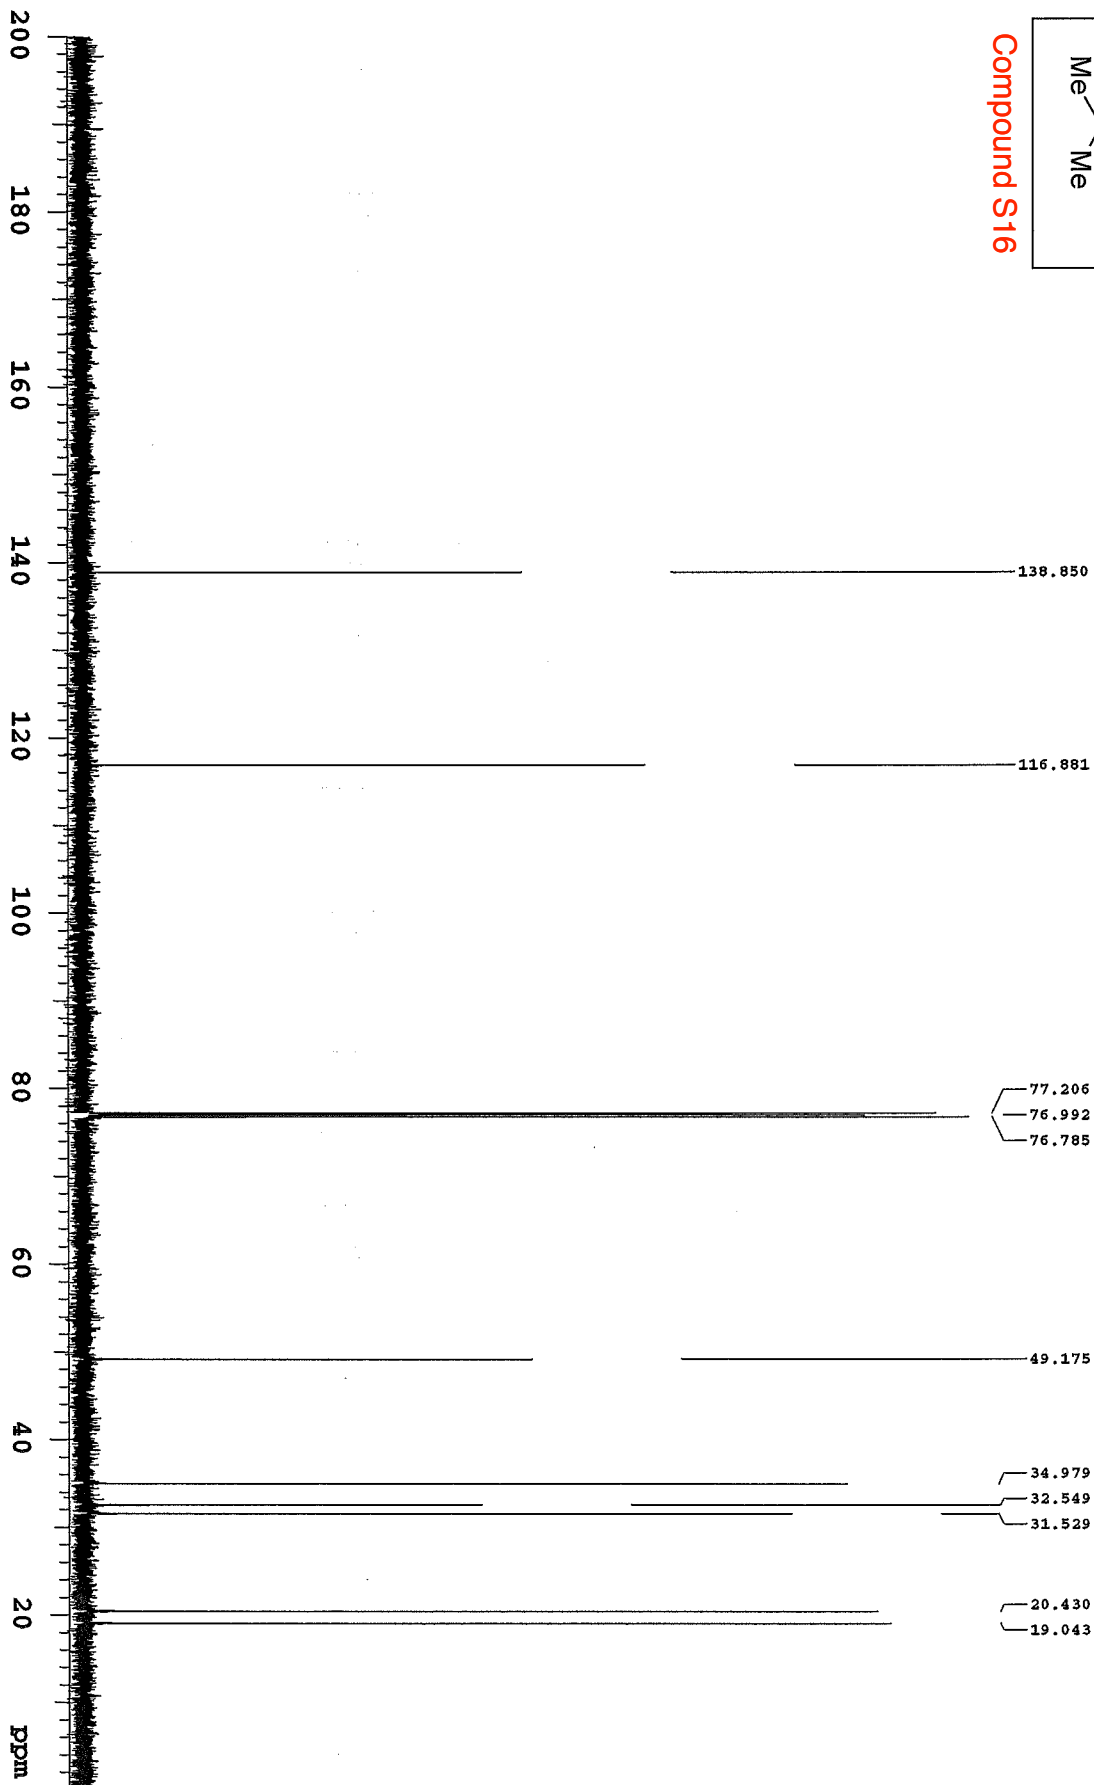



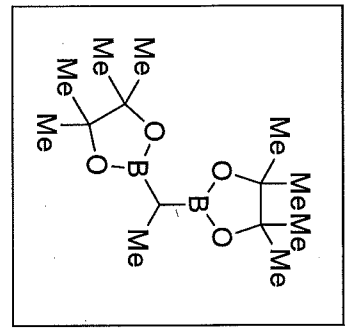

Compound S17

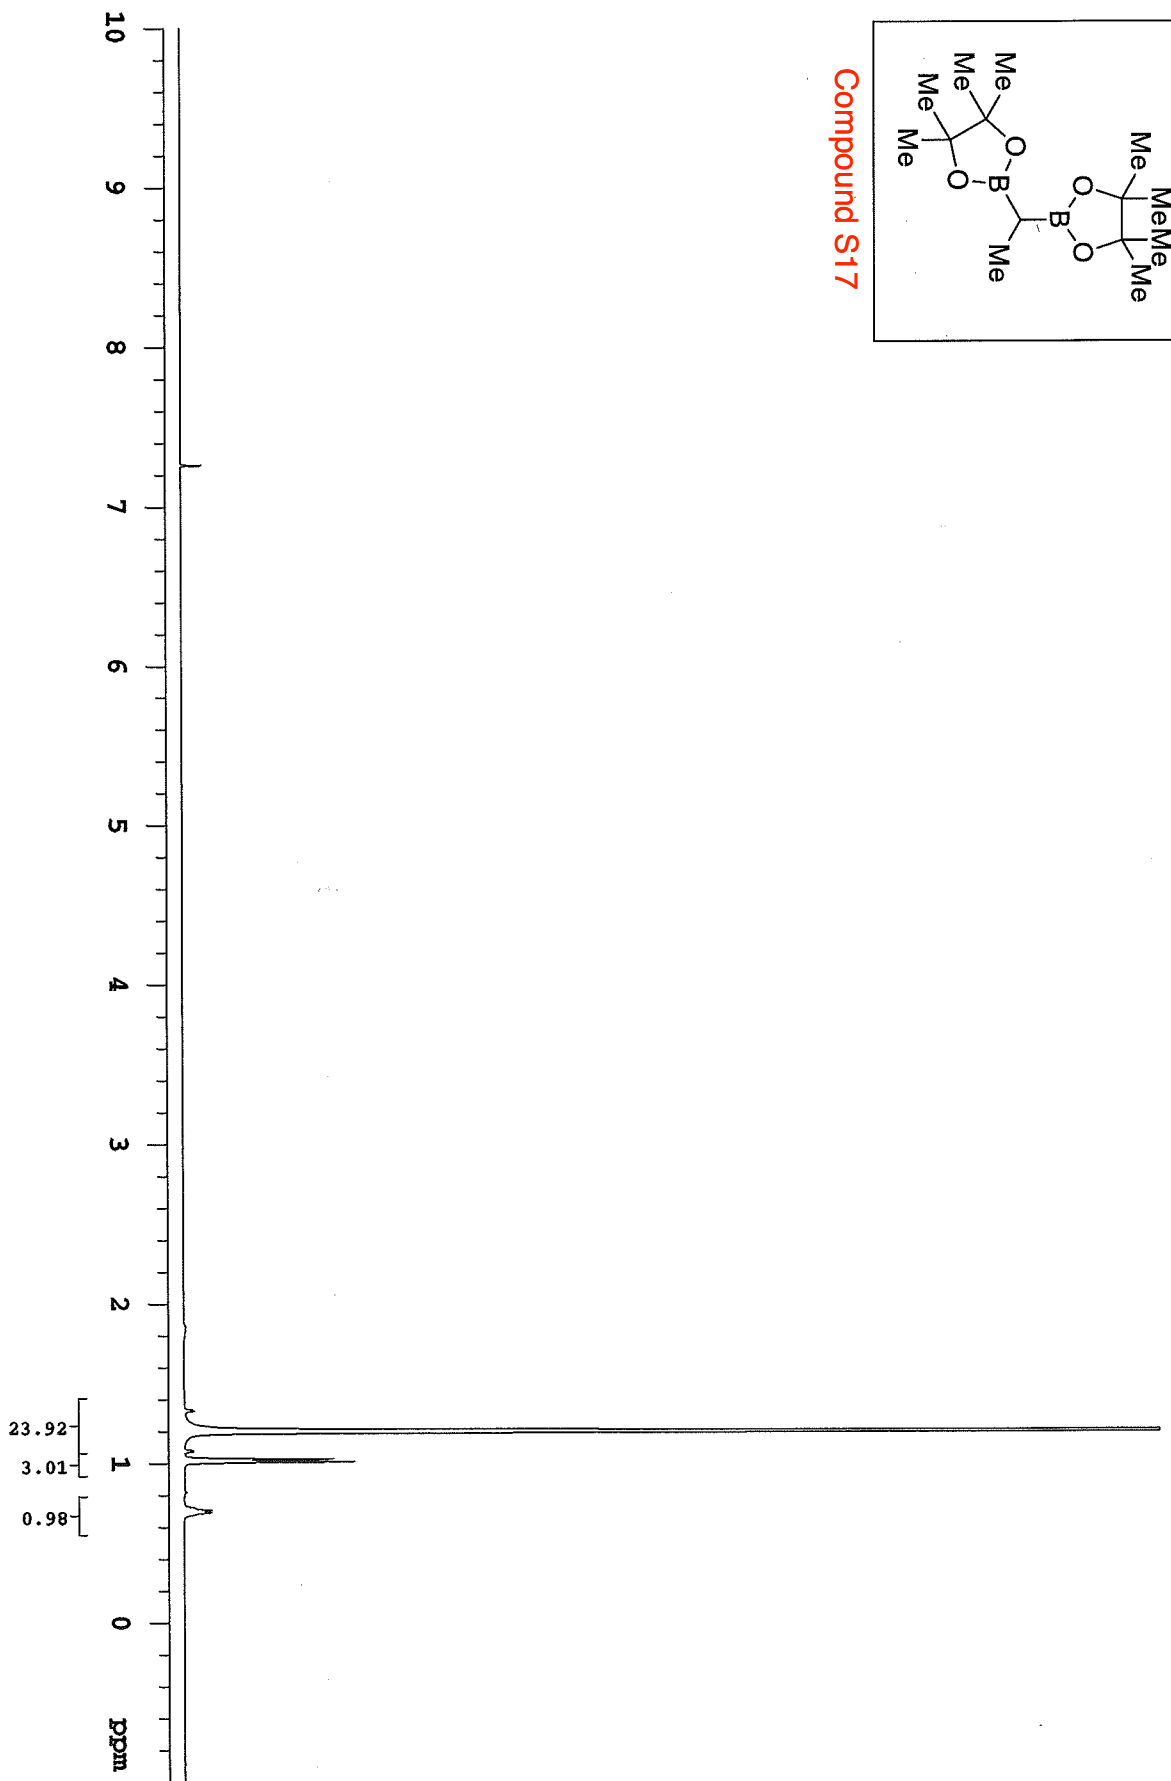

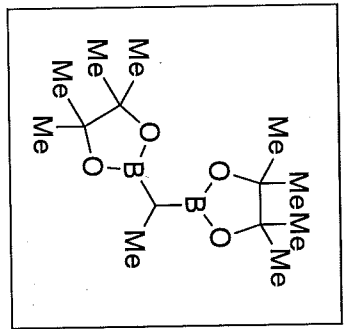

Compound S17

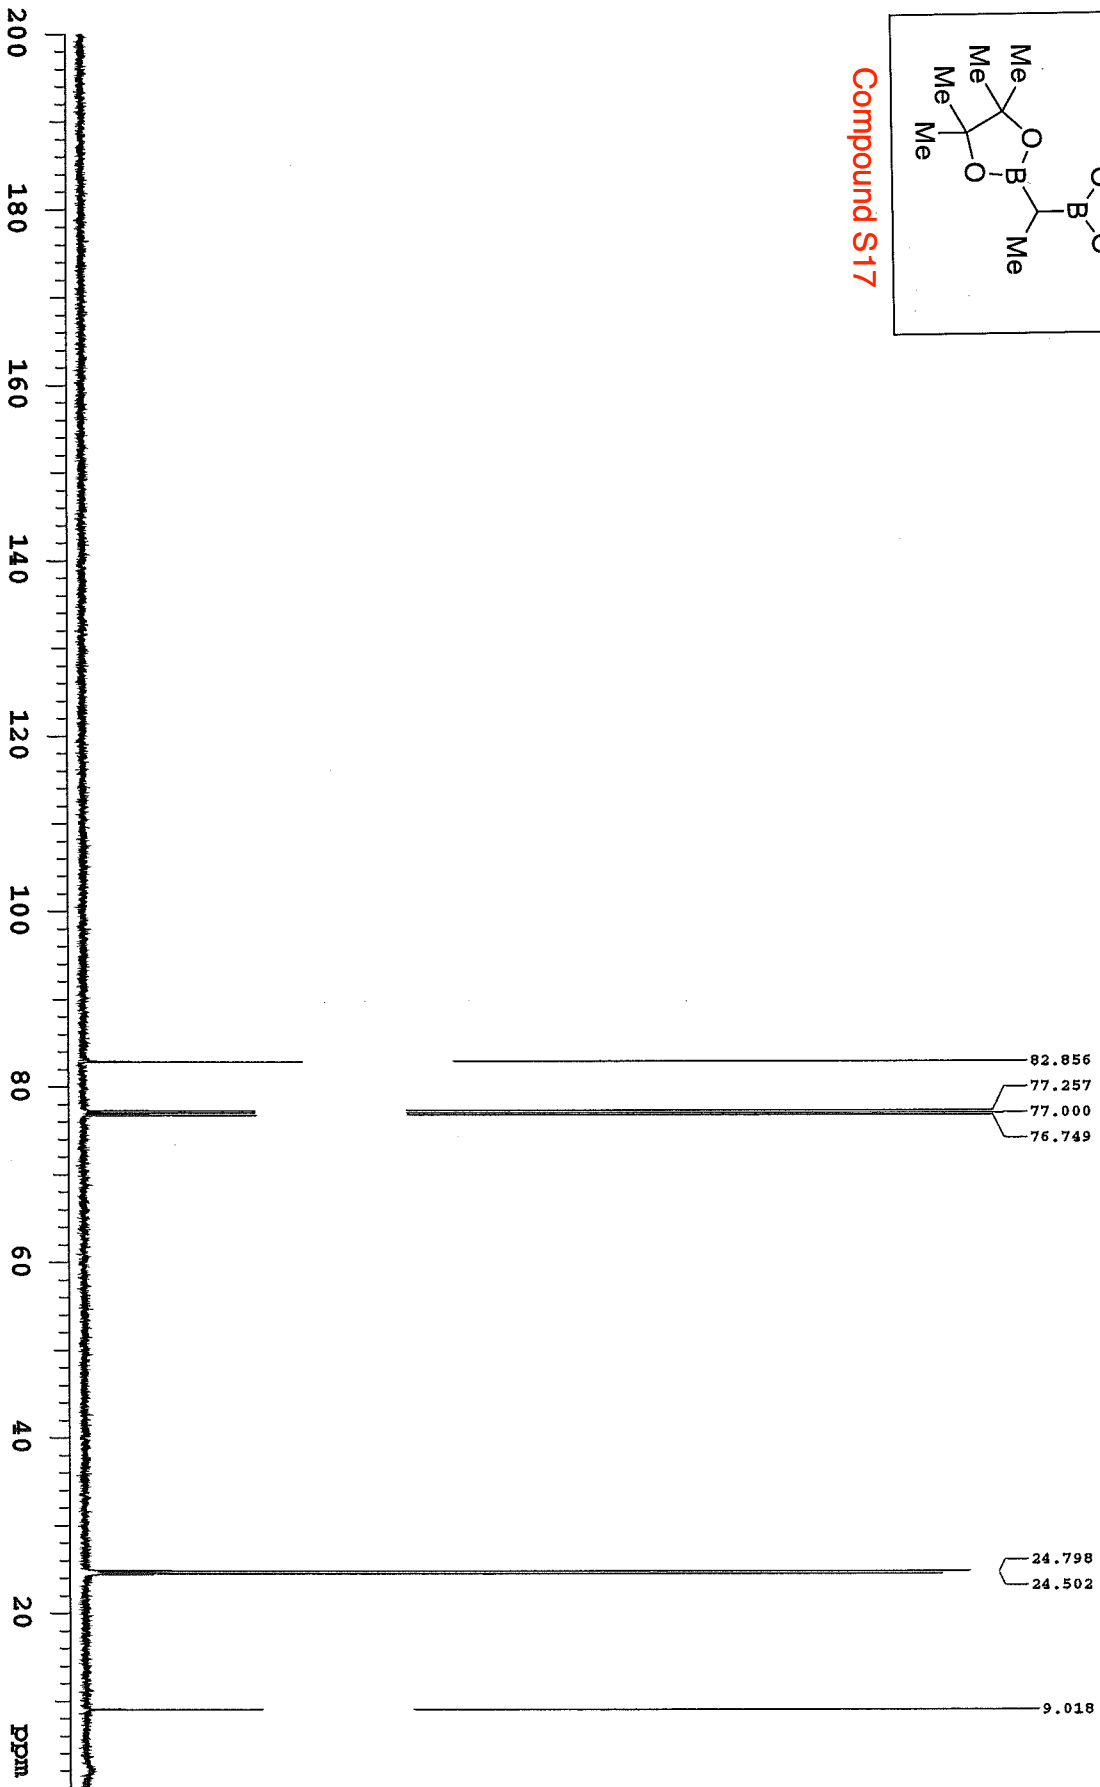

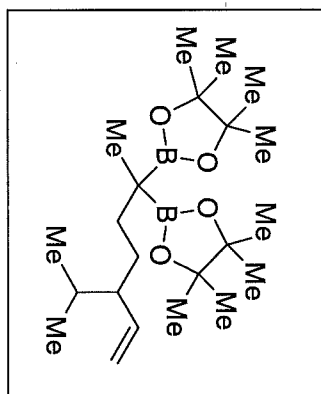

Compound 40

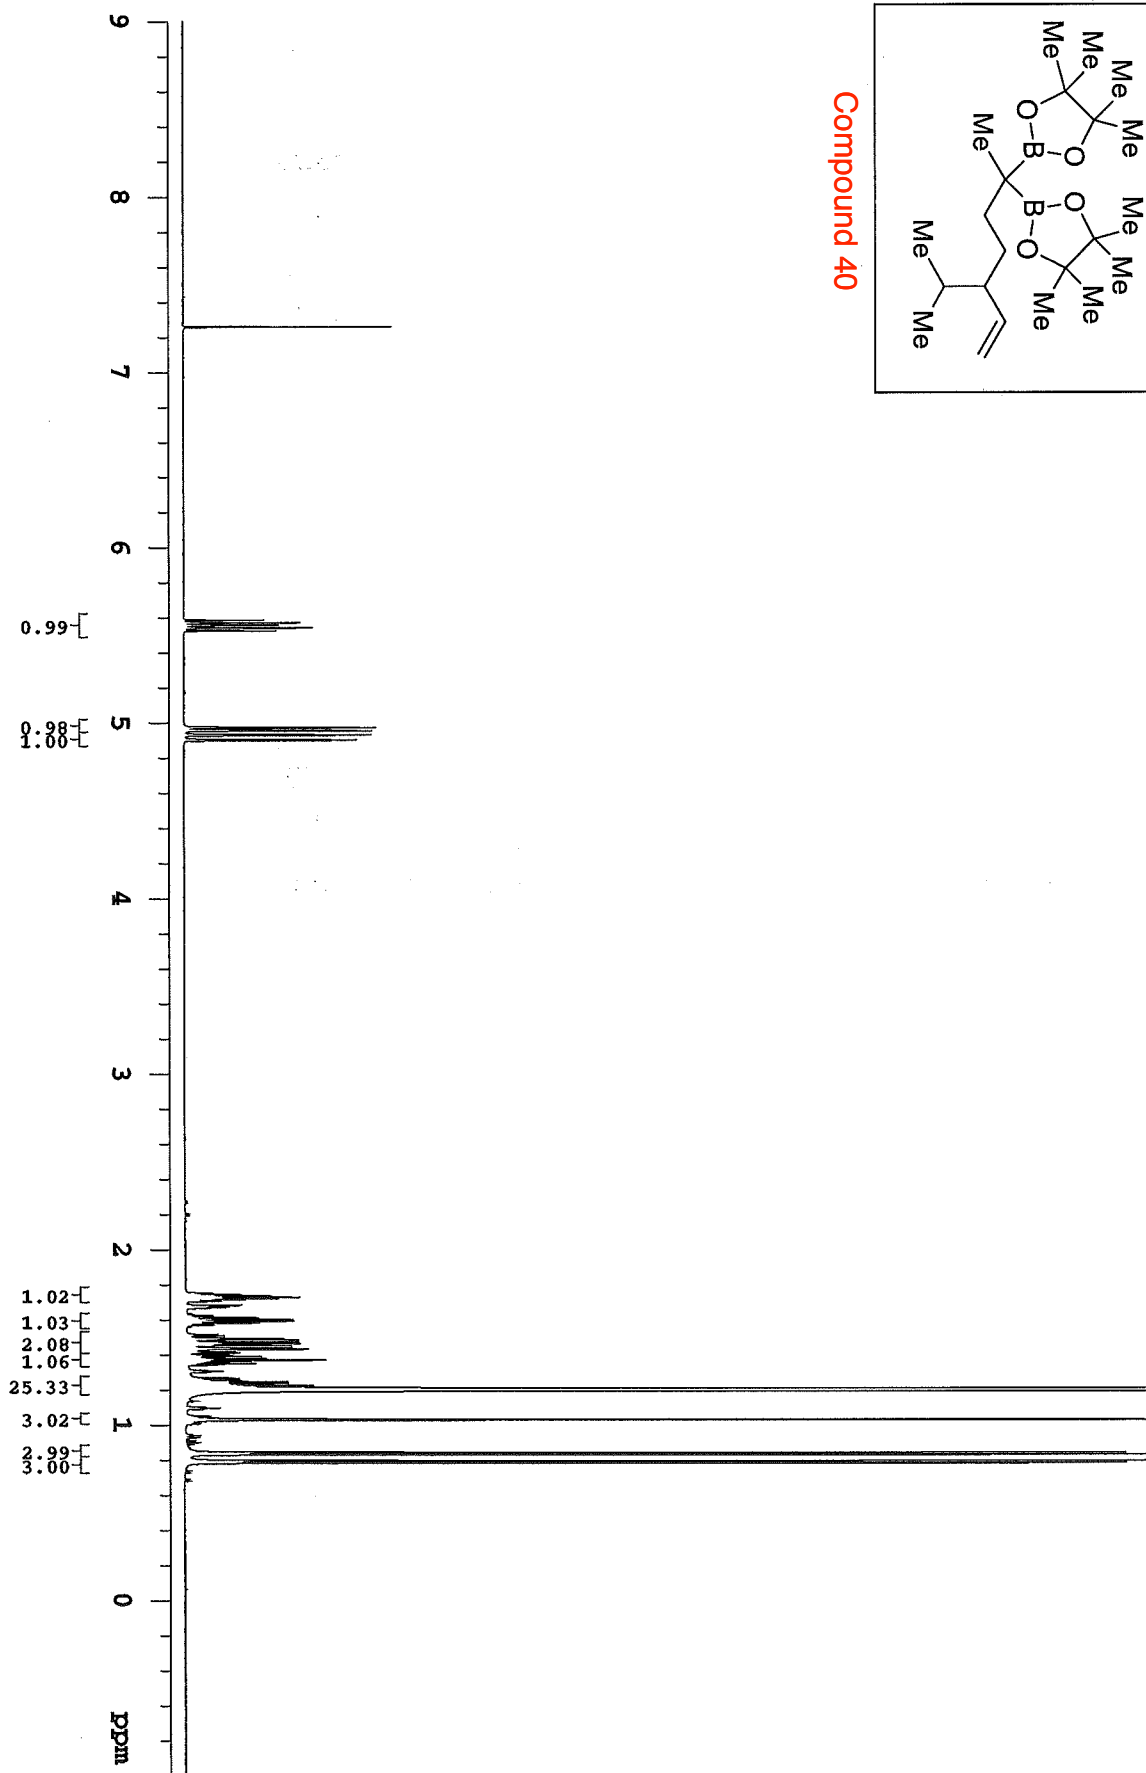

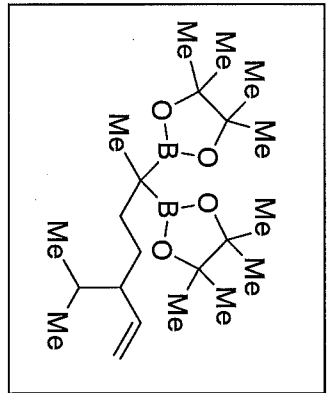

Compound 40

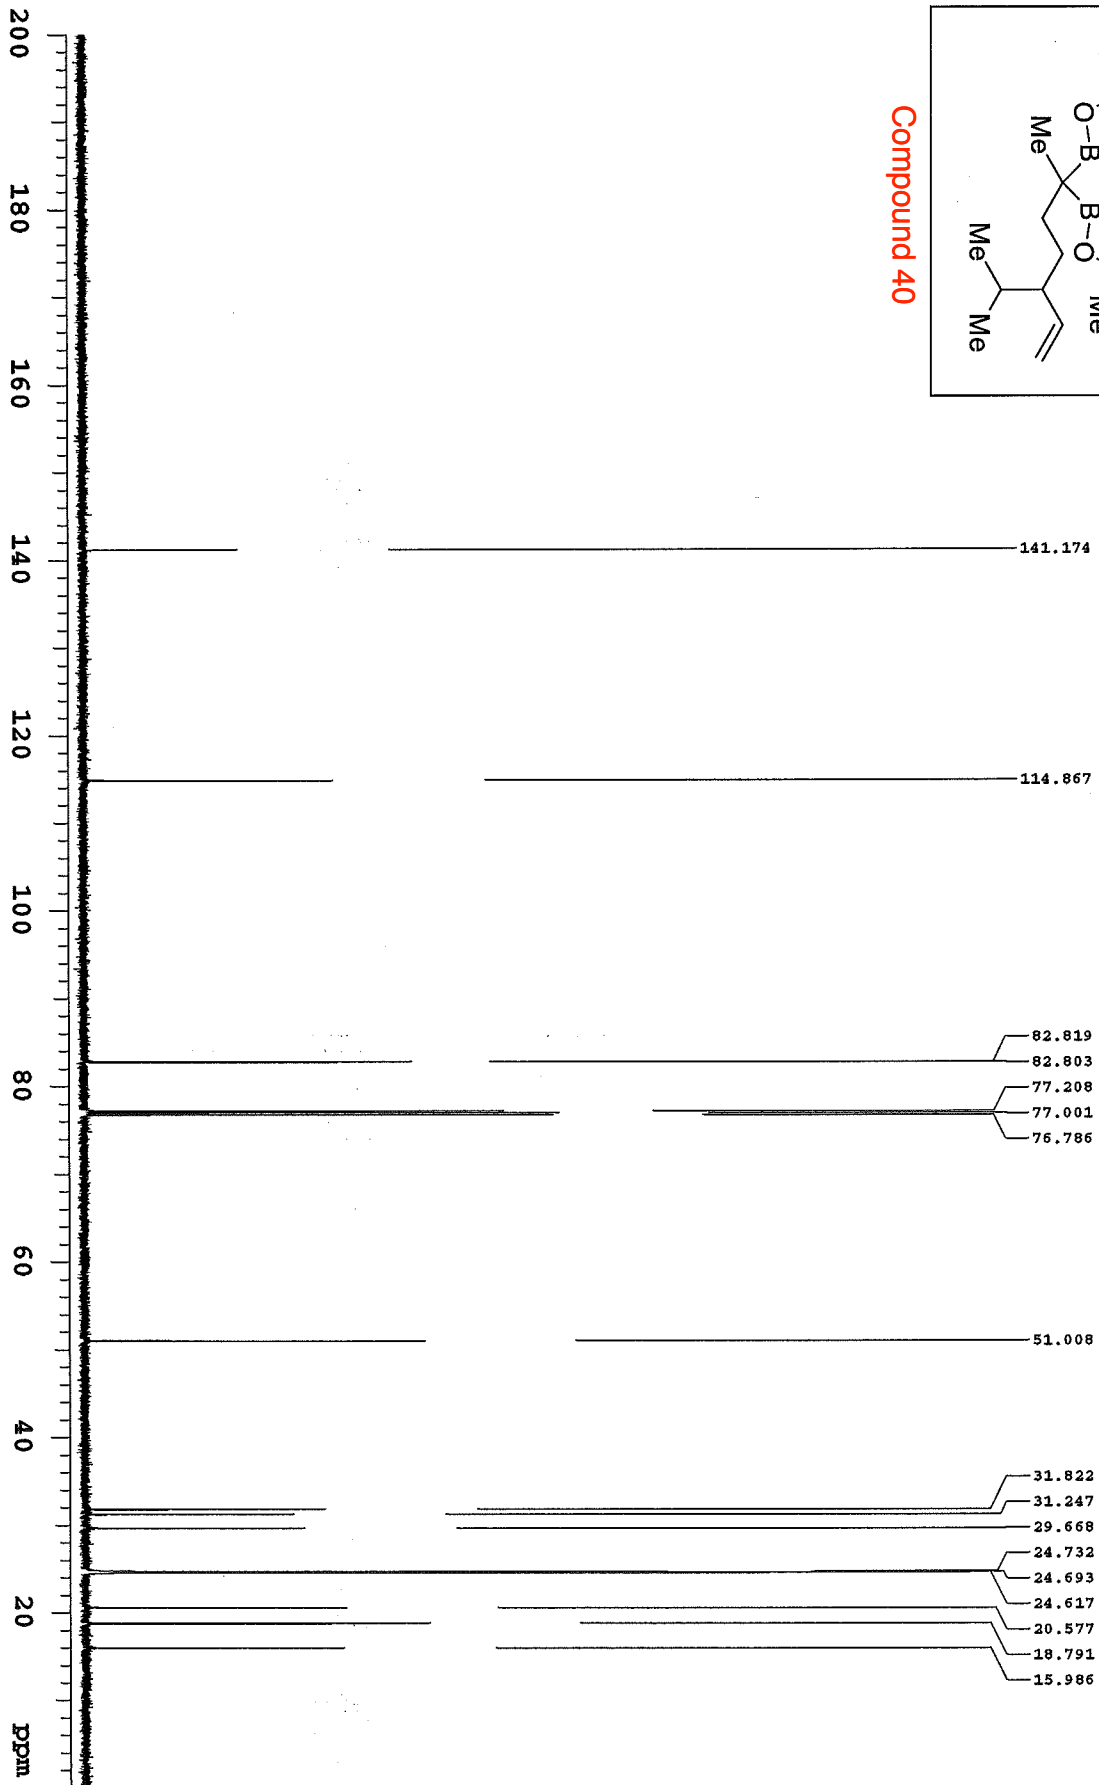

Compound 41

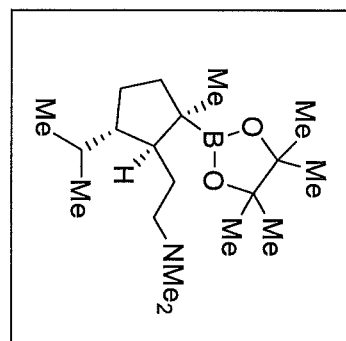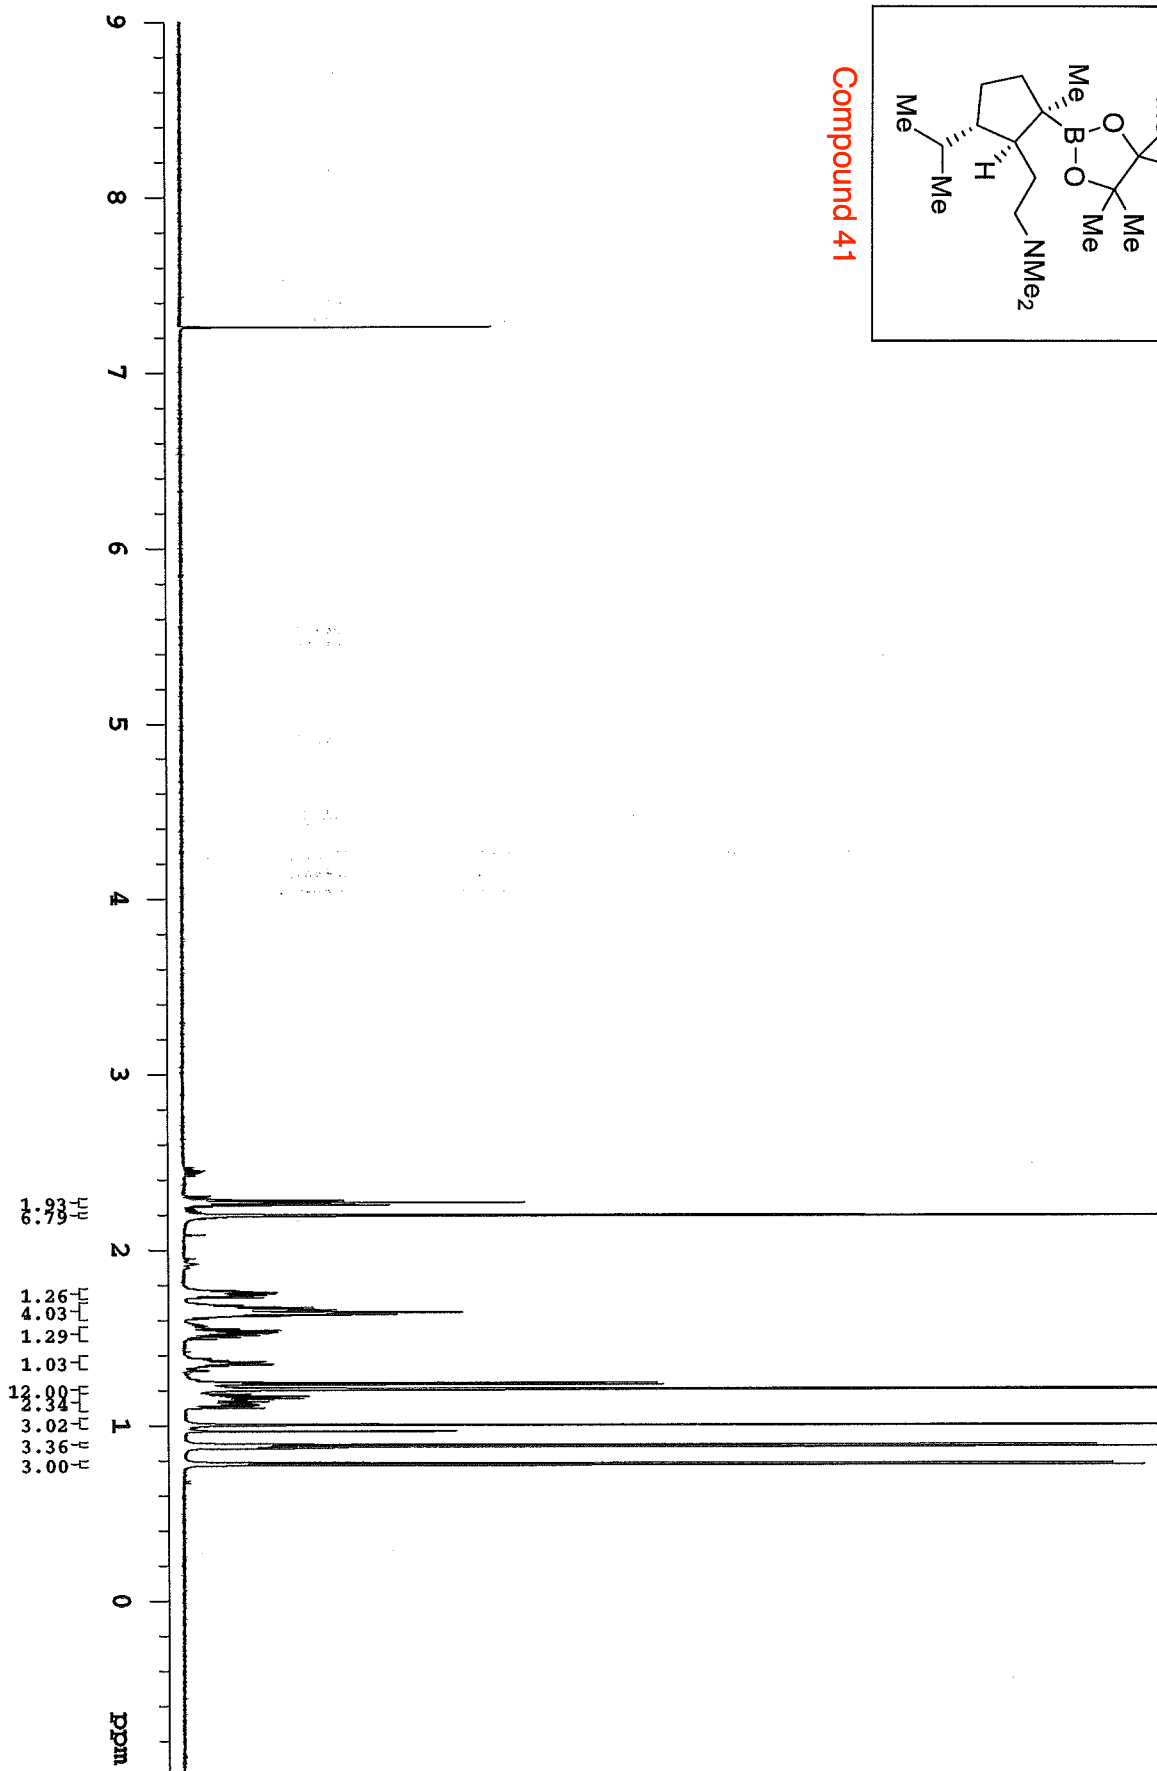

Compound 41

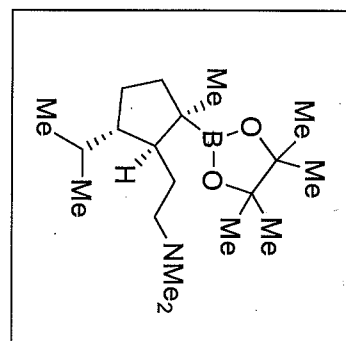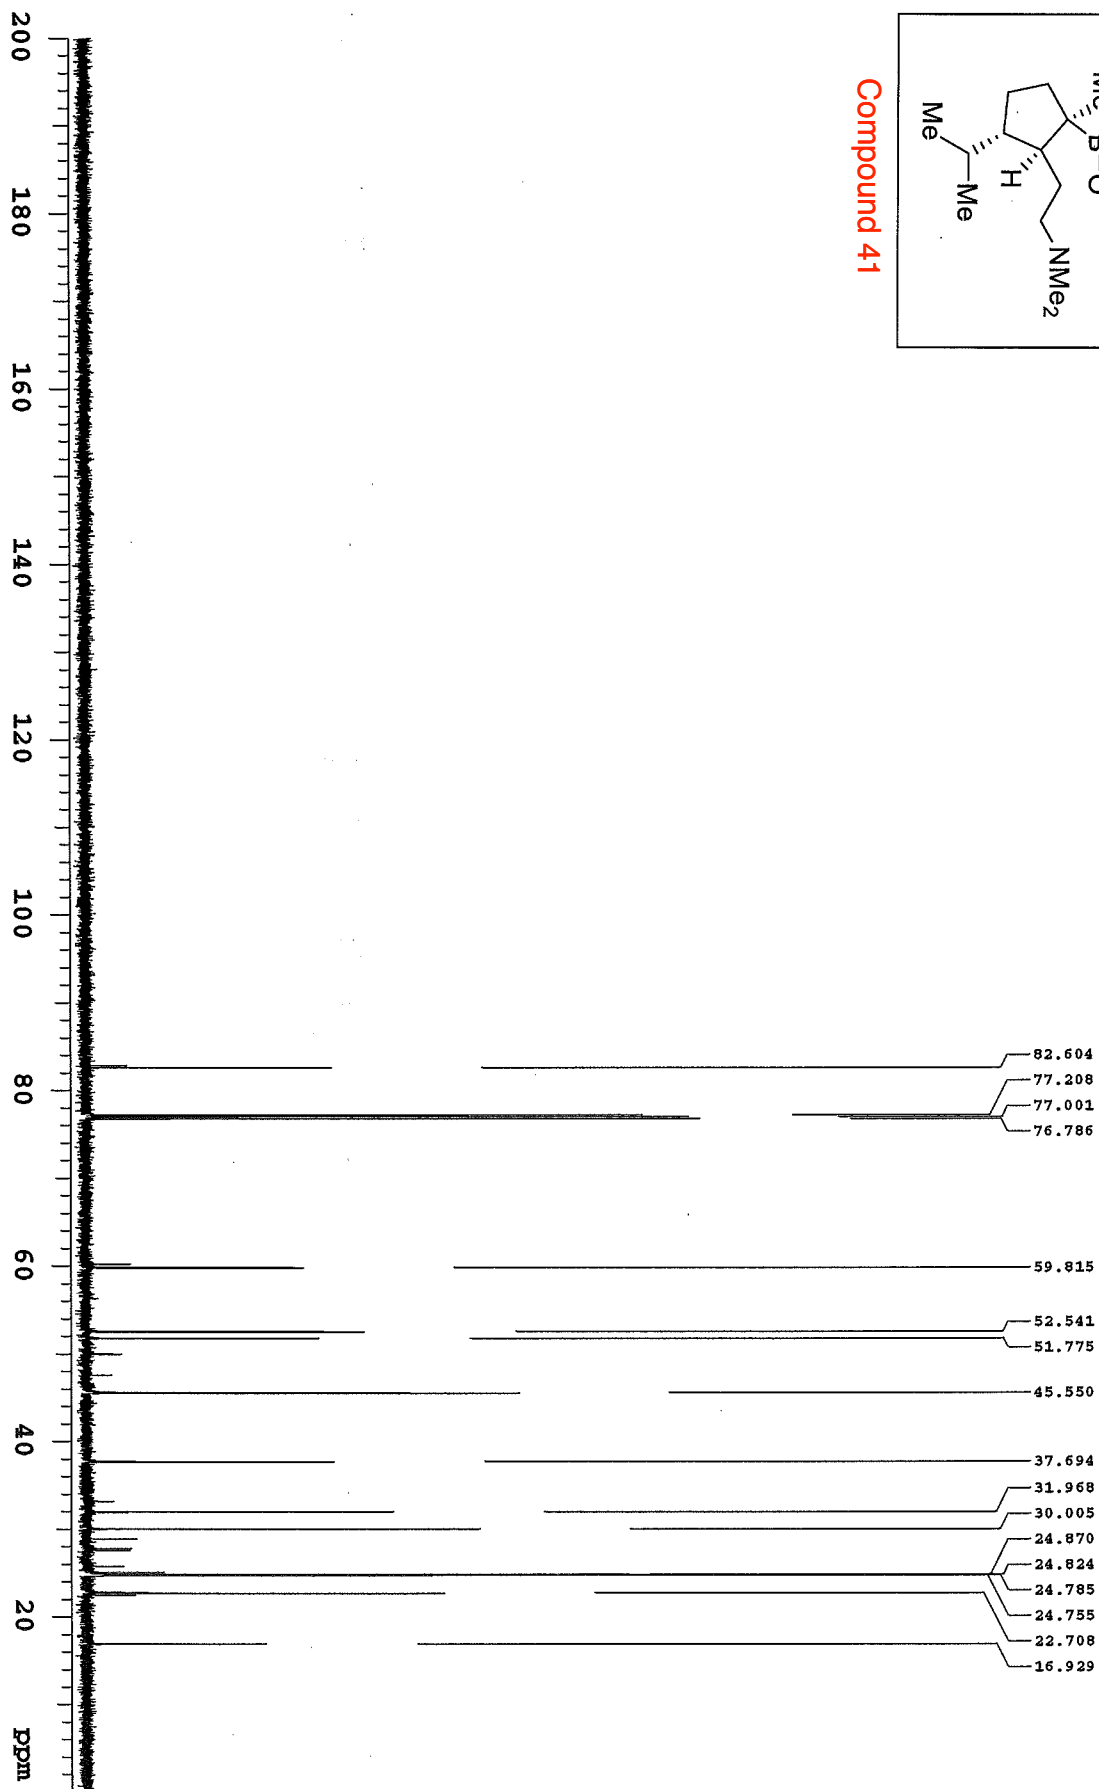

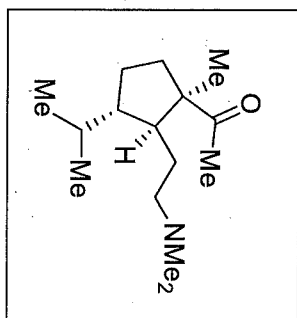

Compound 42

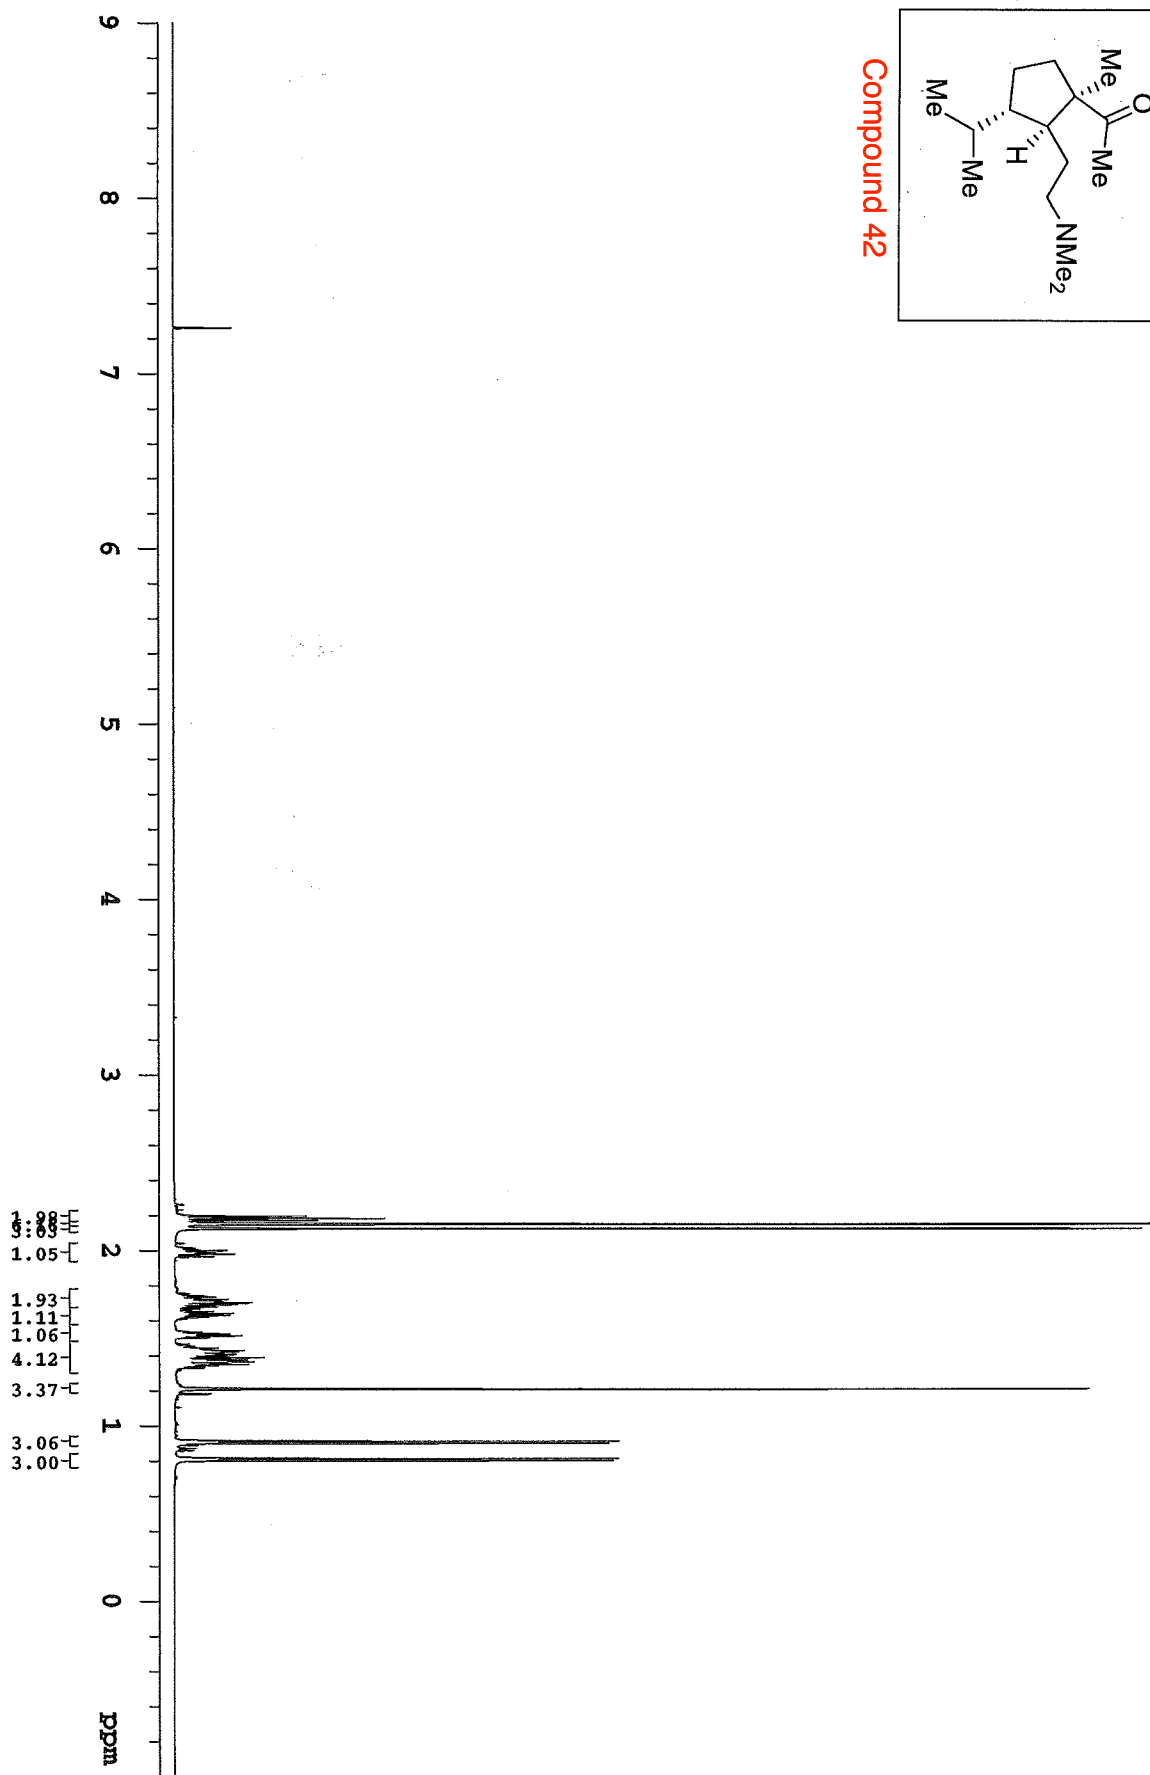

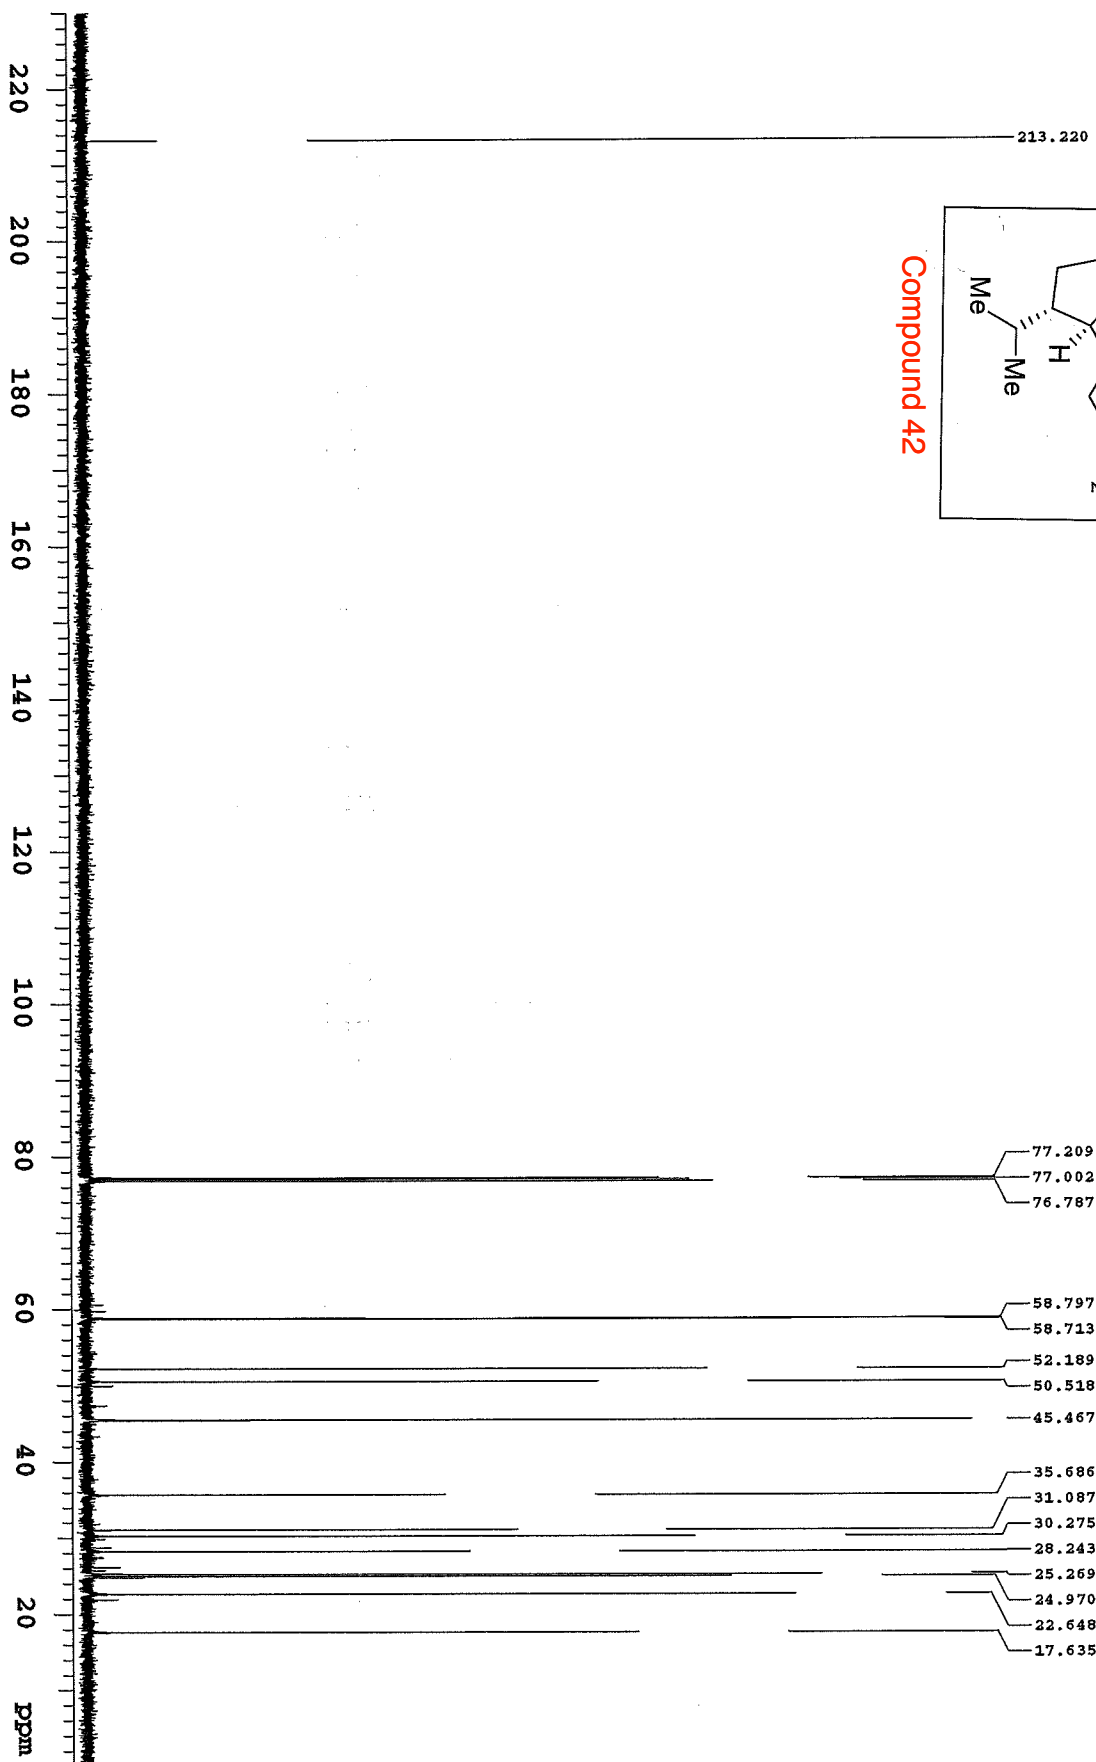



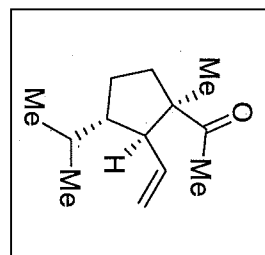

Compound 43

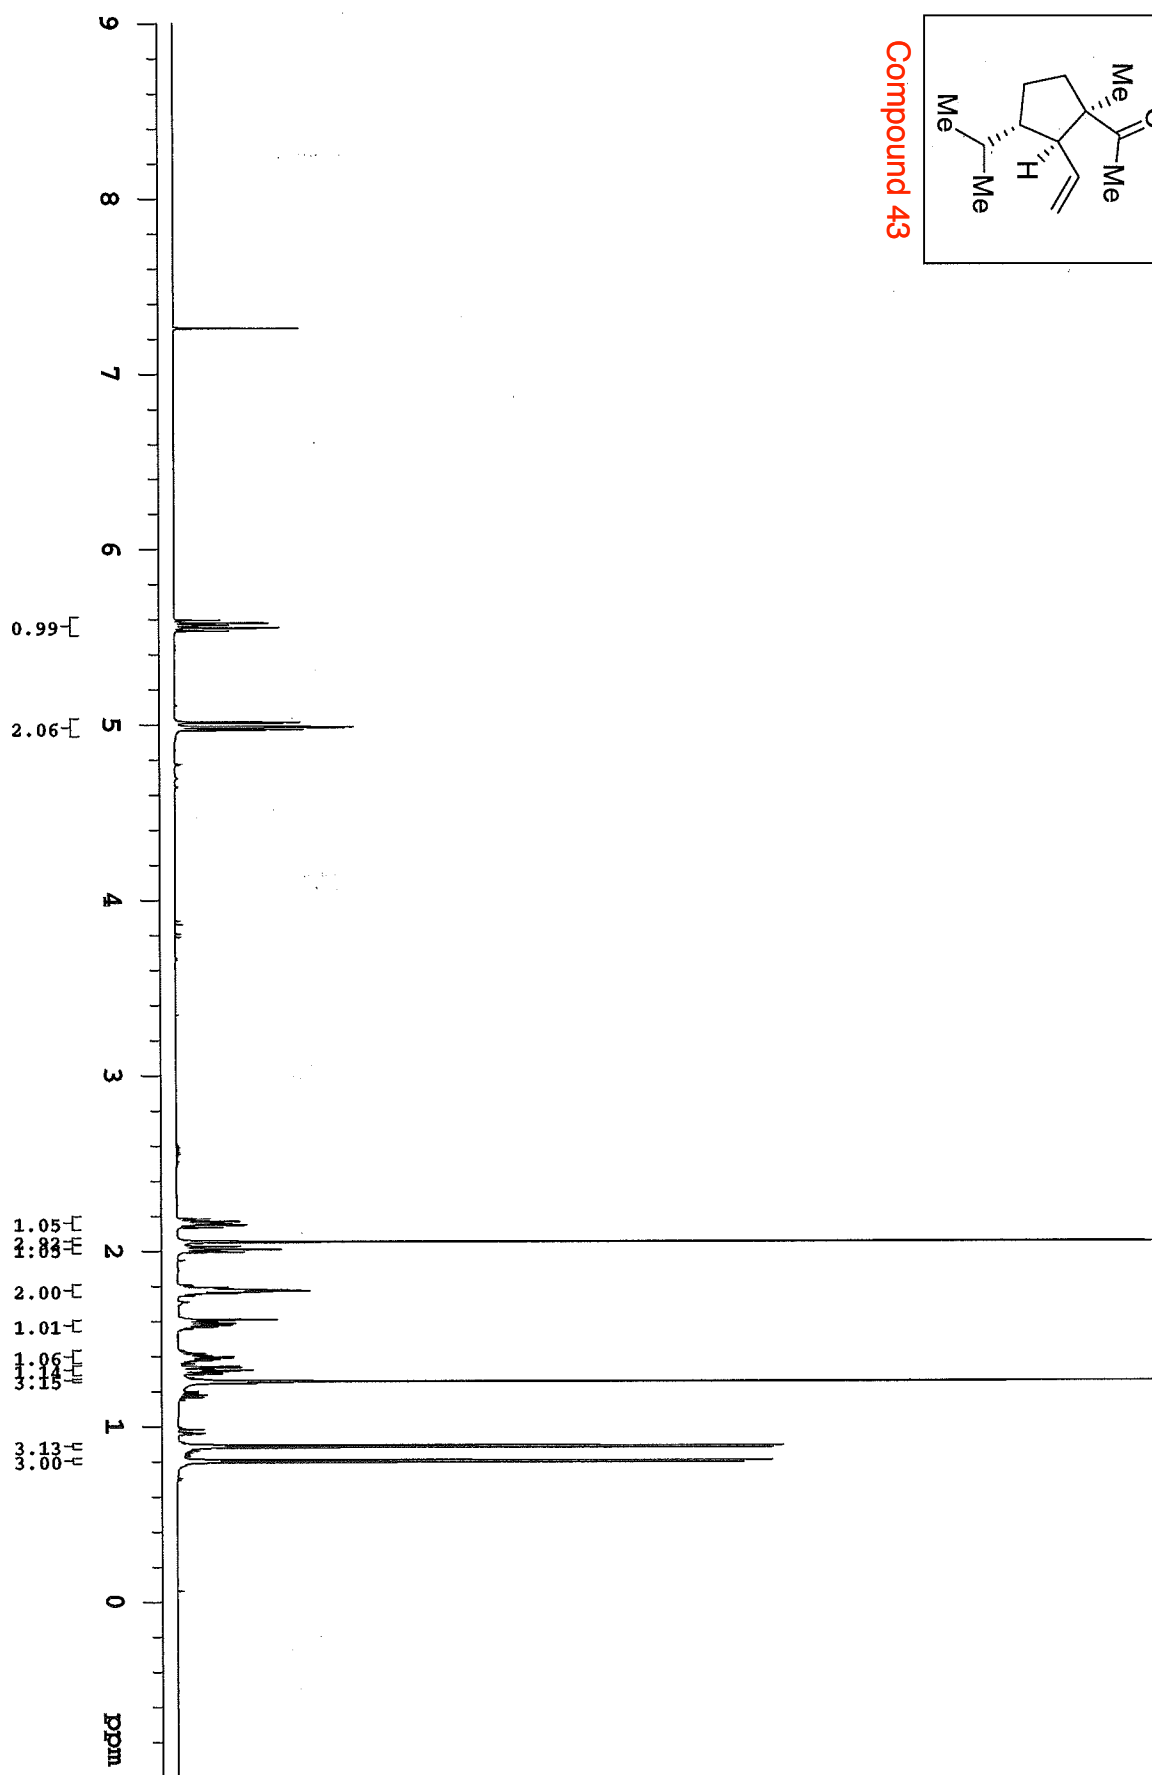

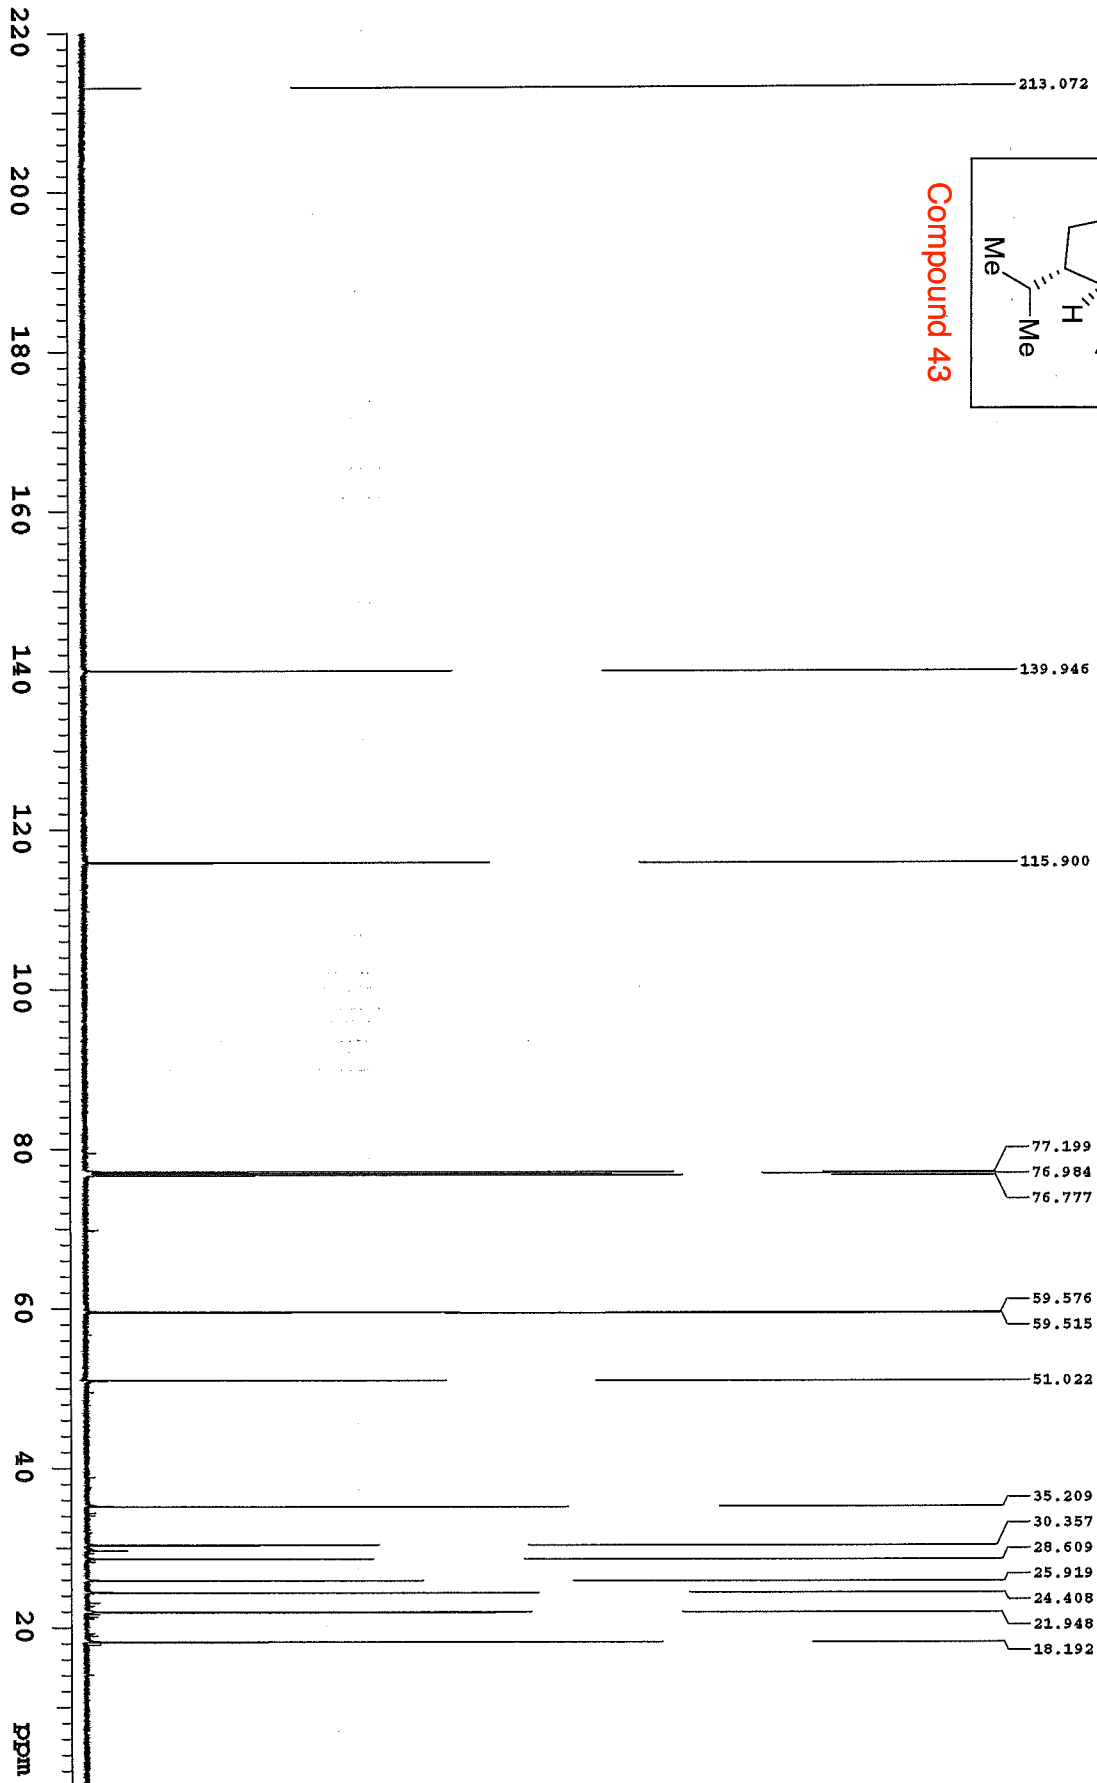

Compound 43

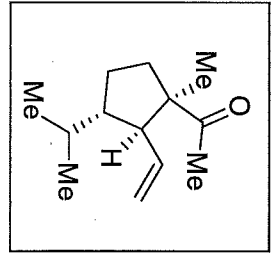

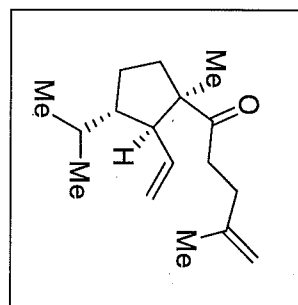

Compound S18

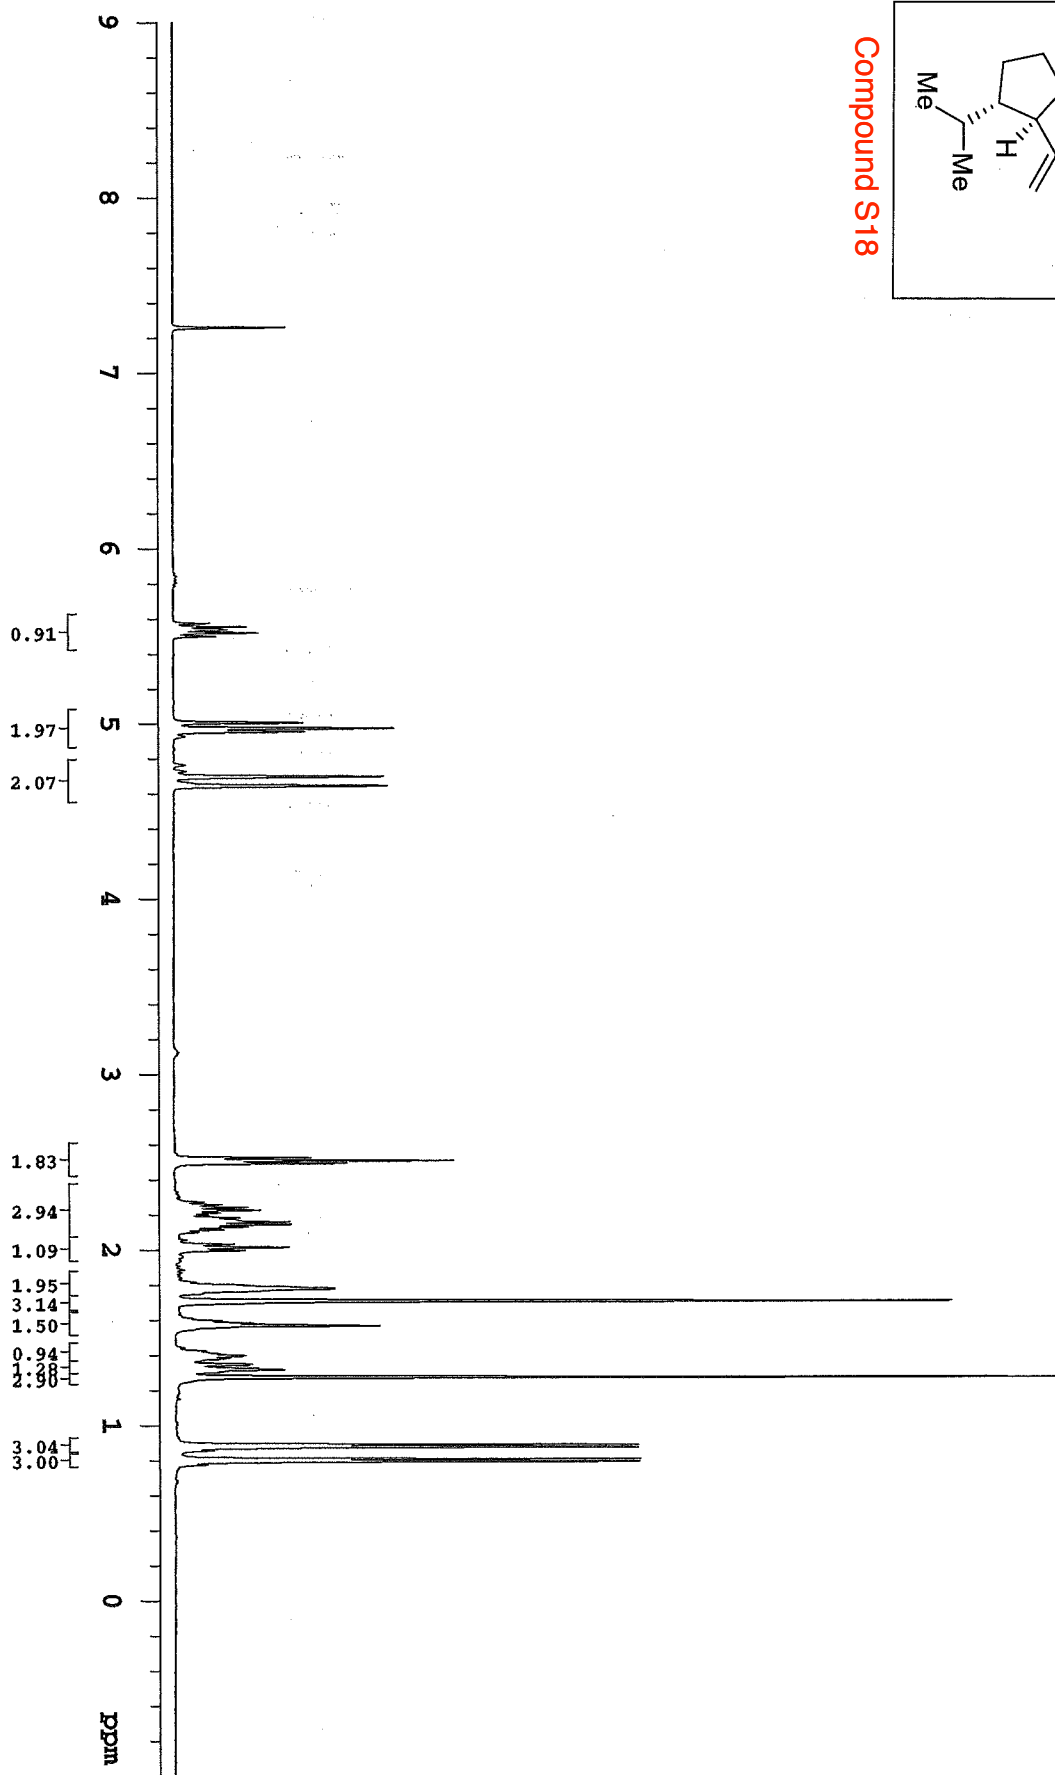

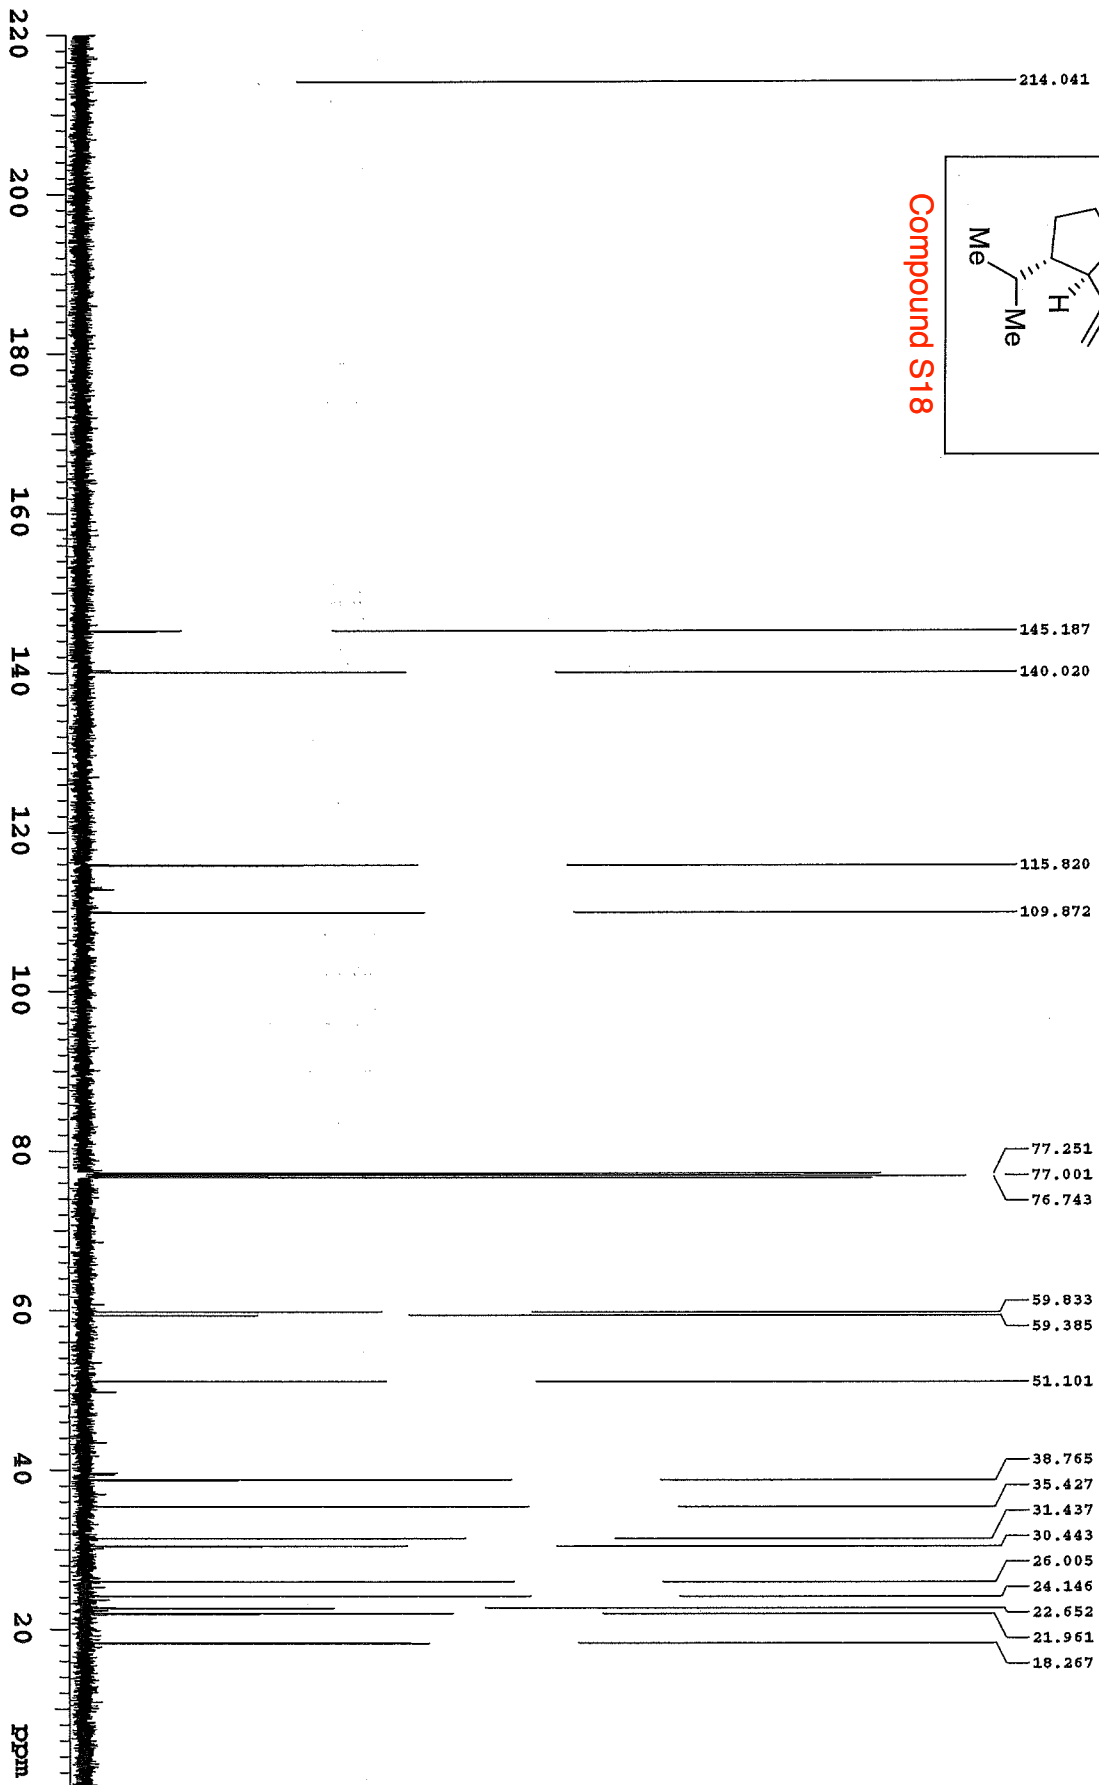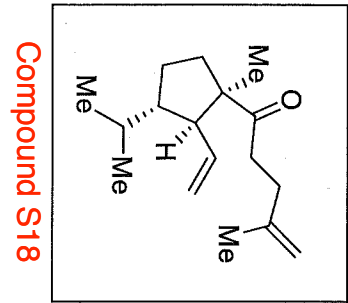

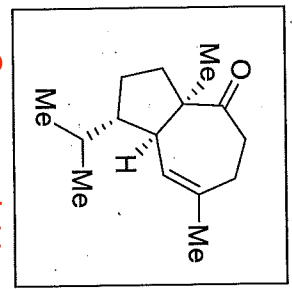

Compound 44

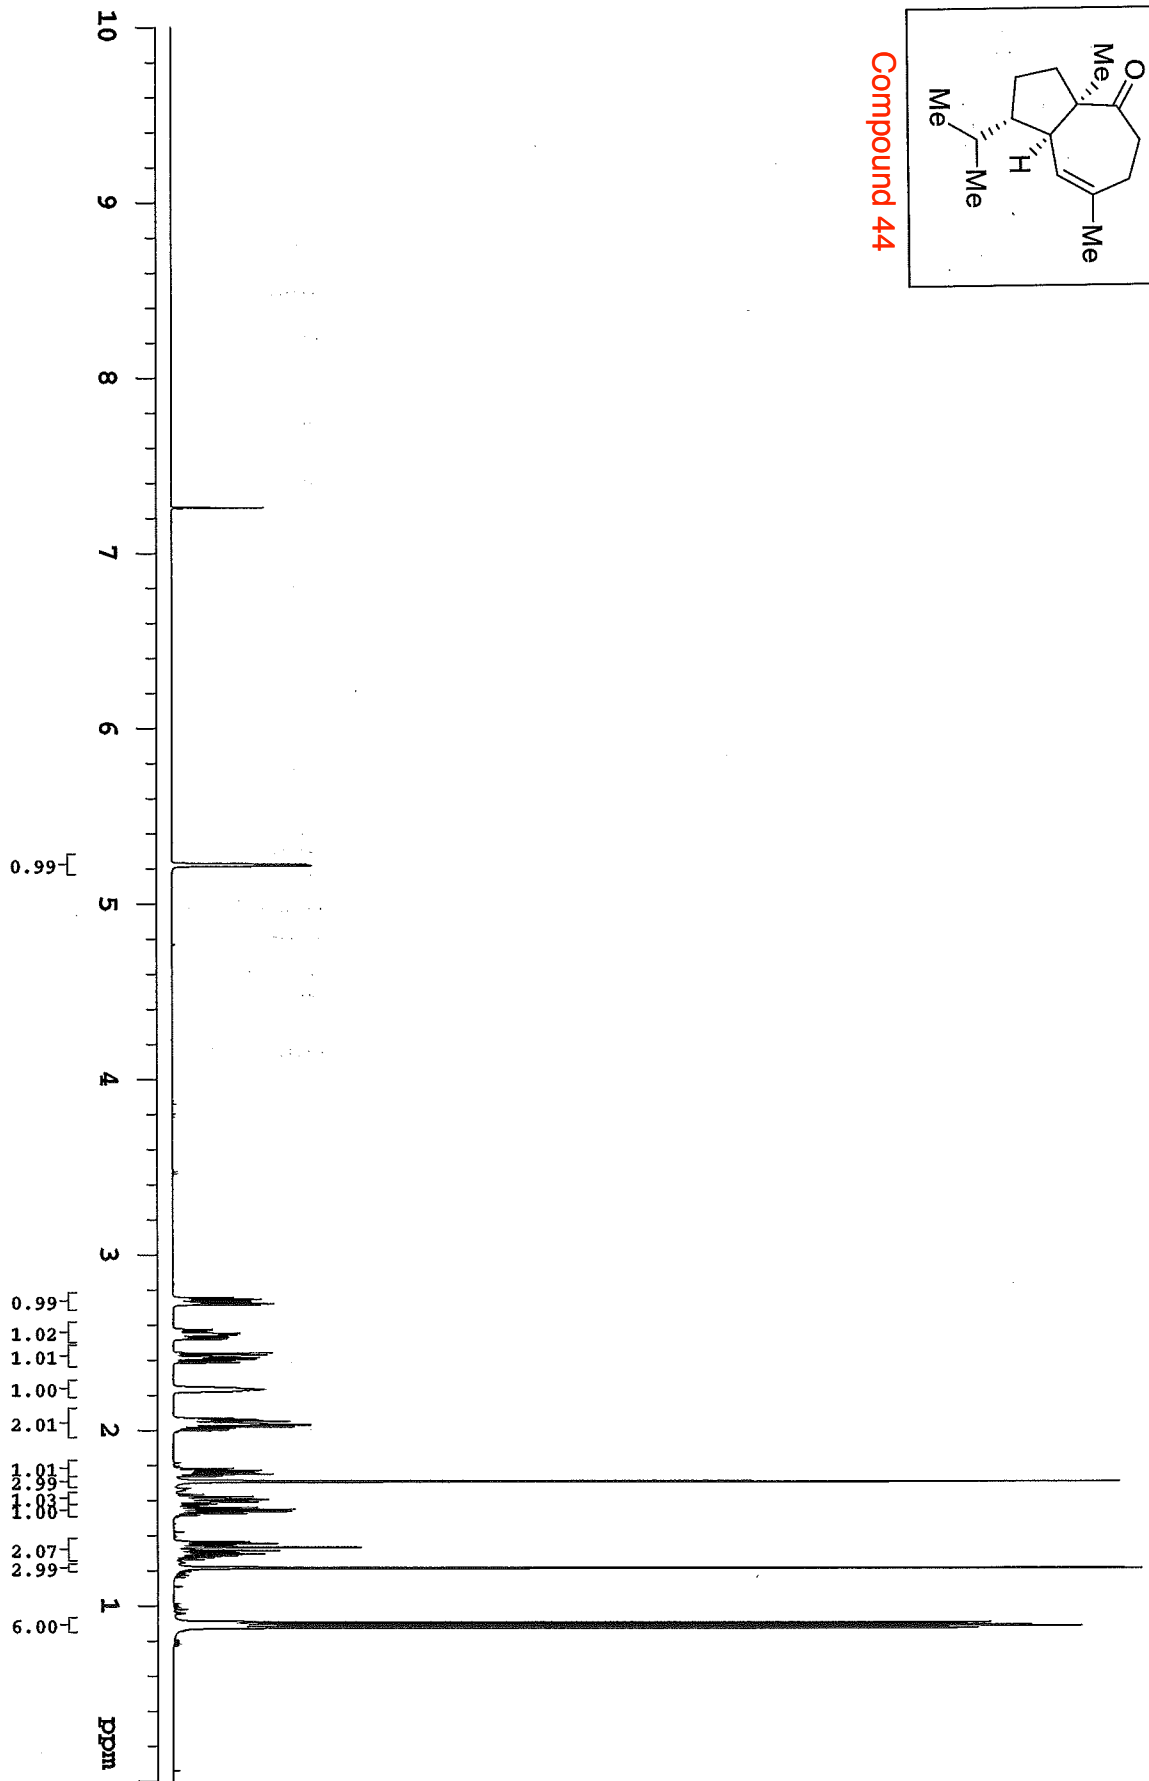

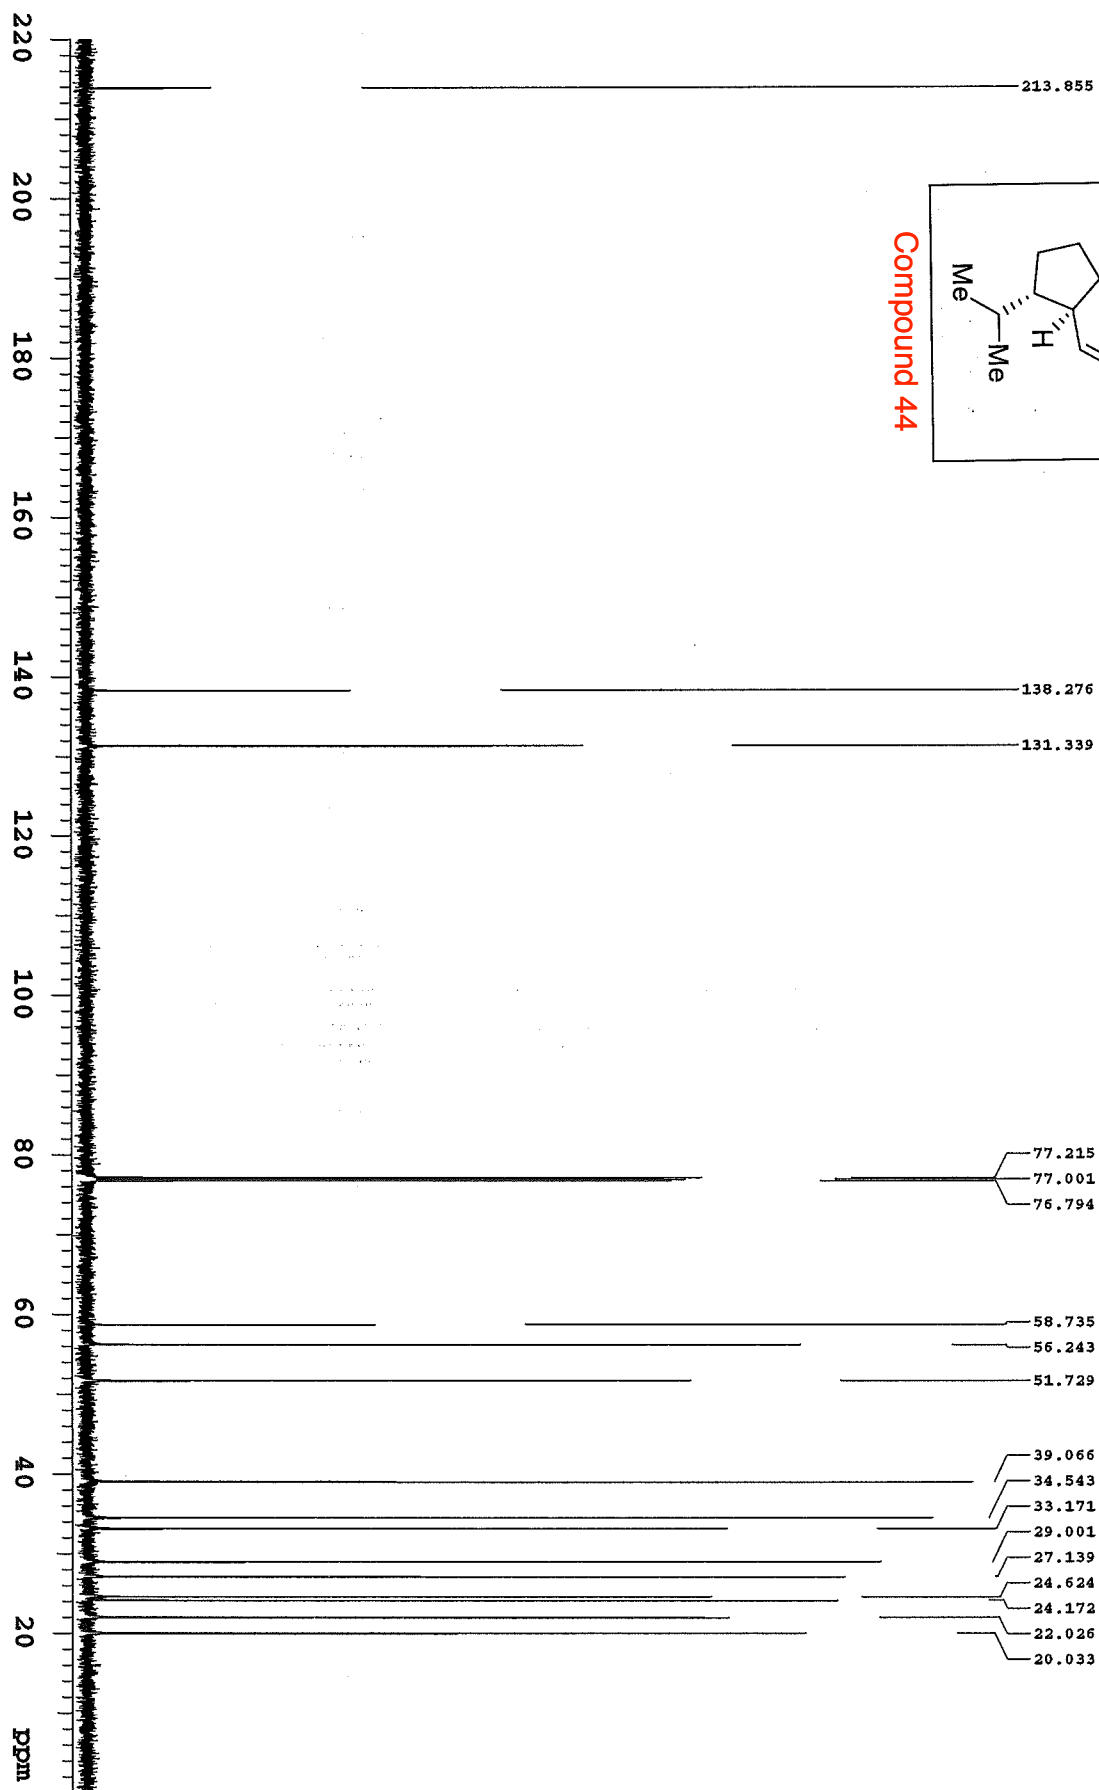

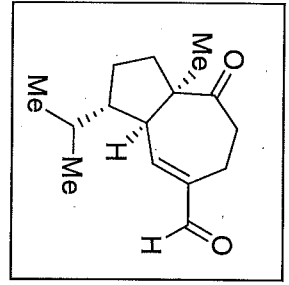

Aphanamal

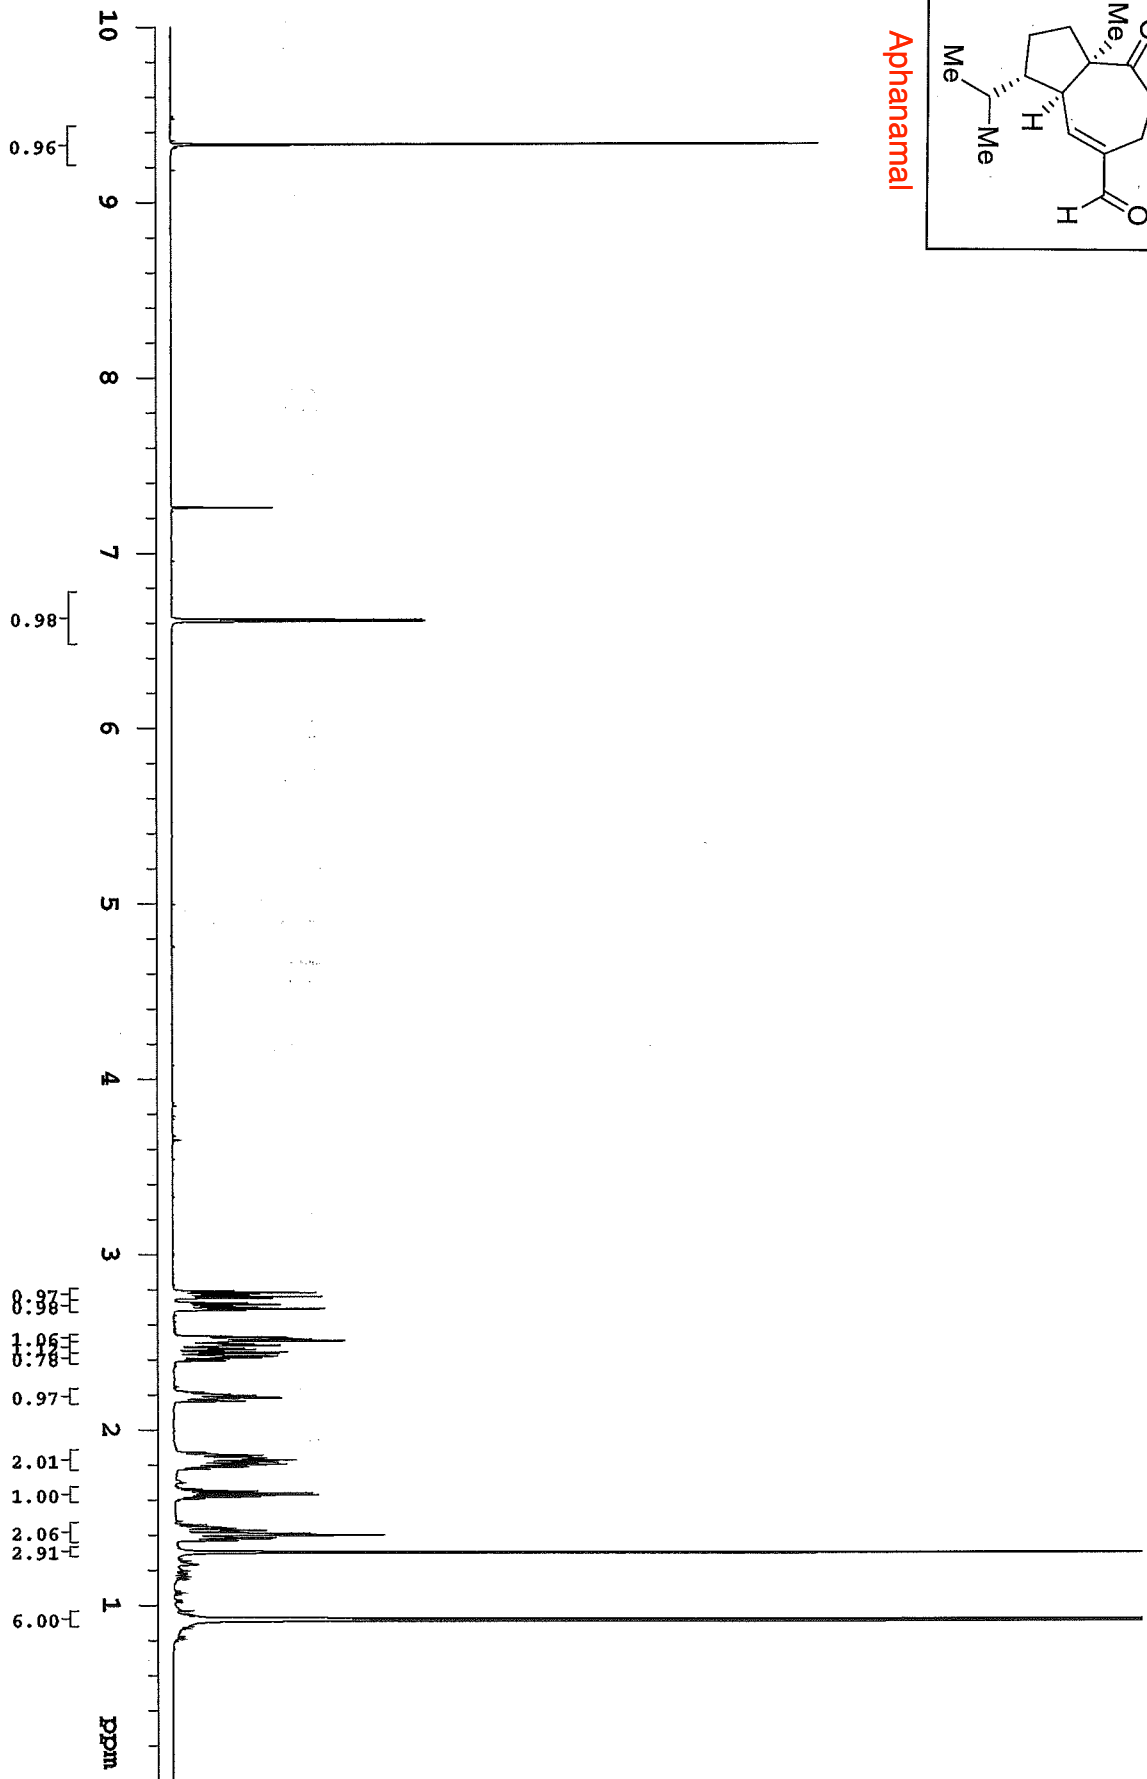

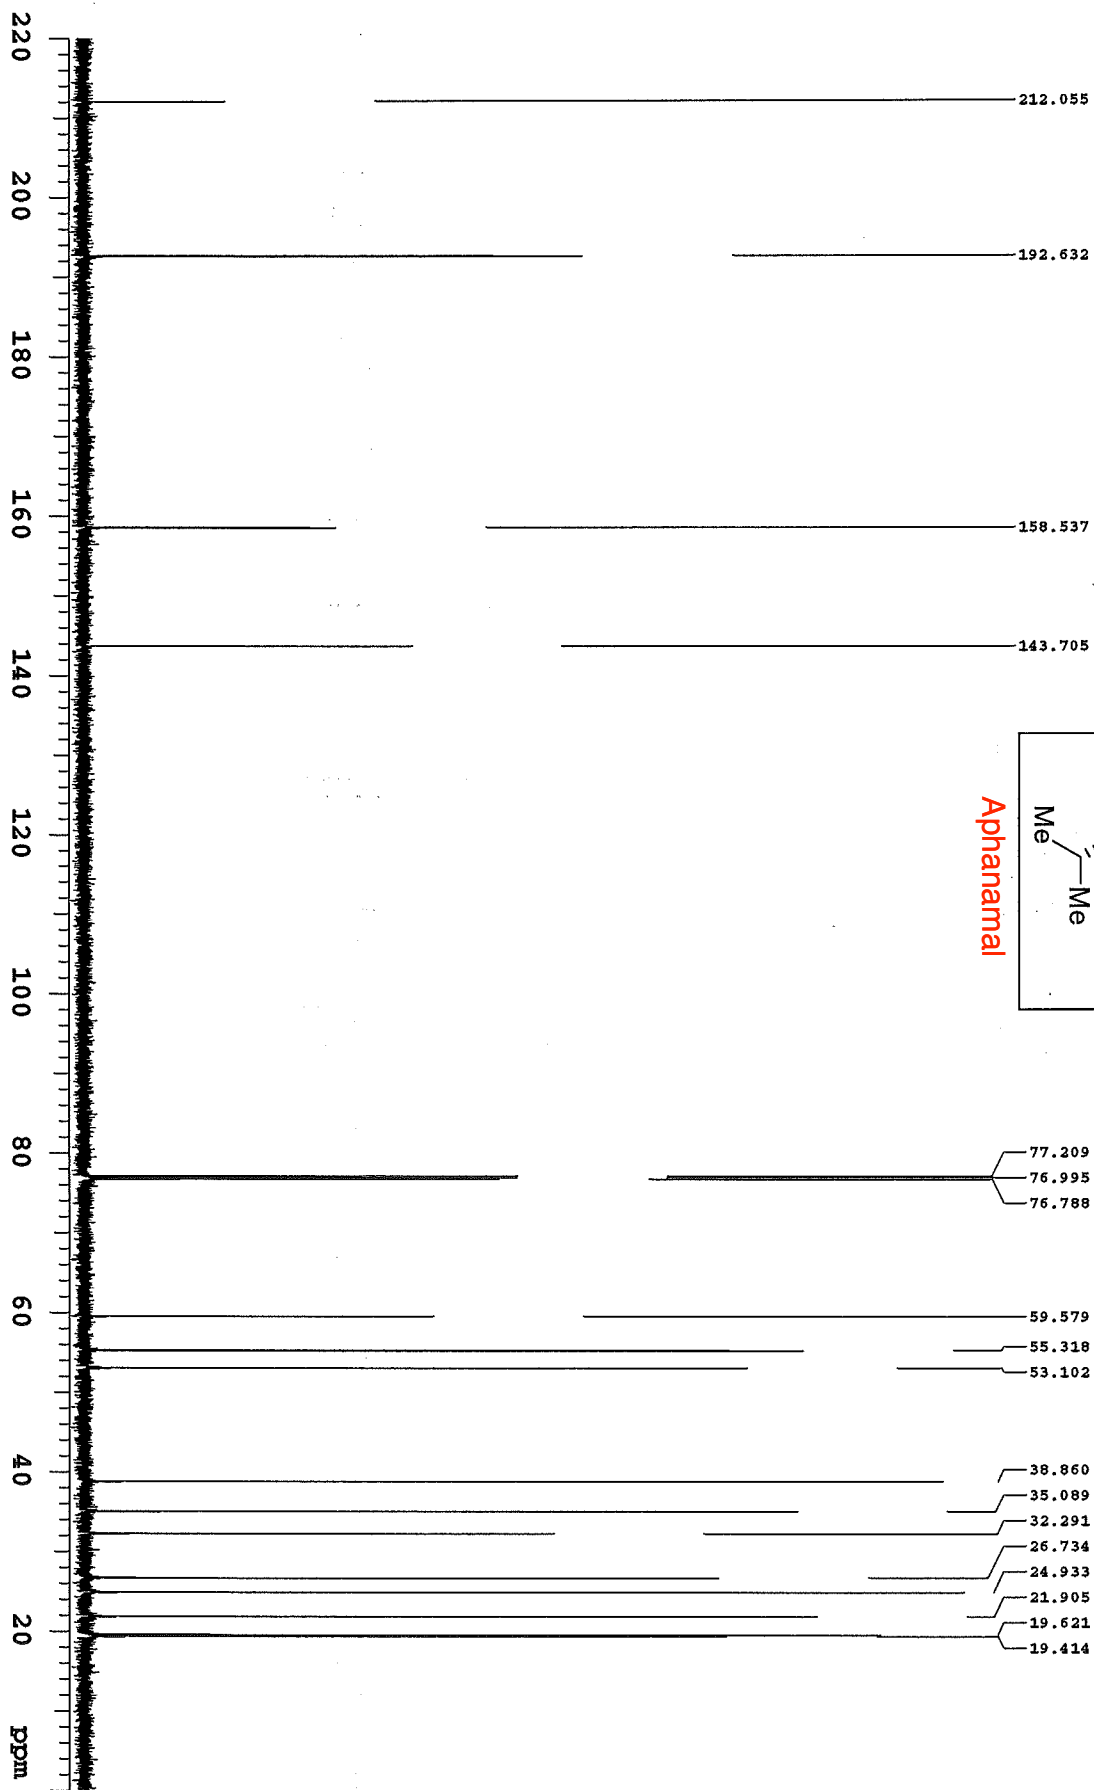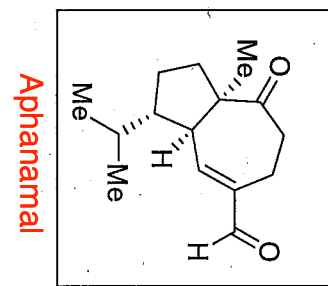



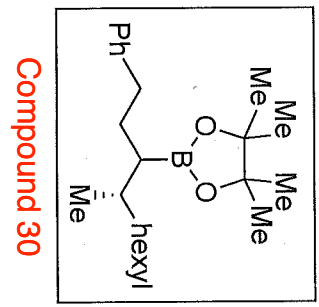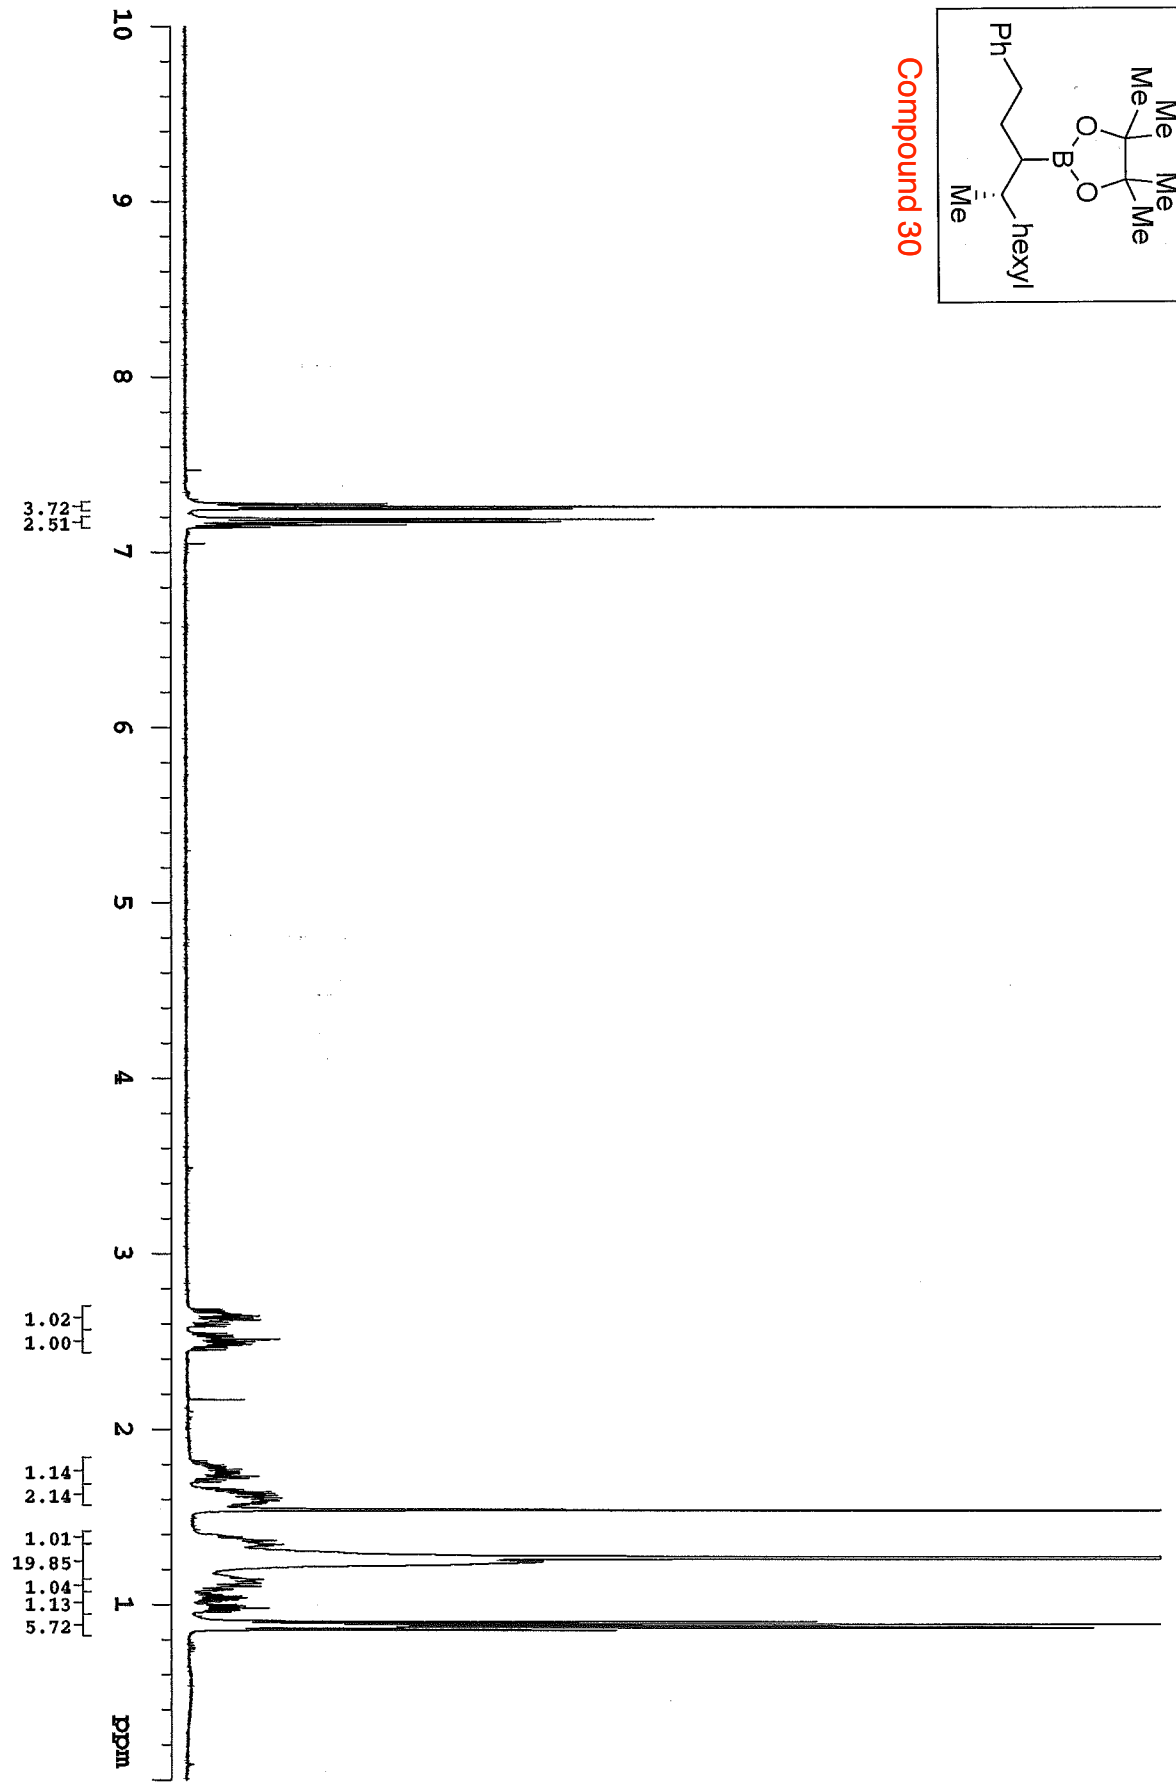

Compound 30

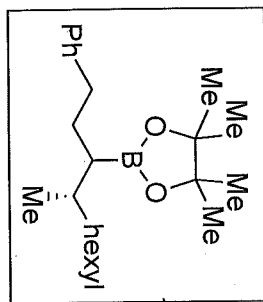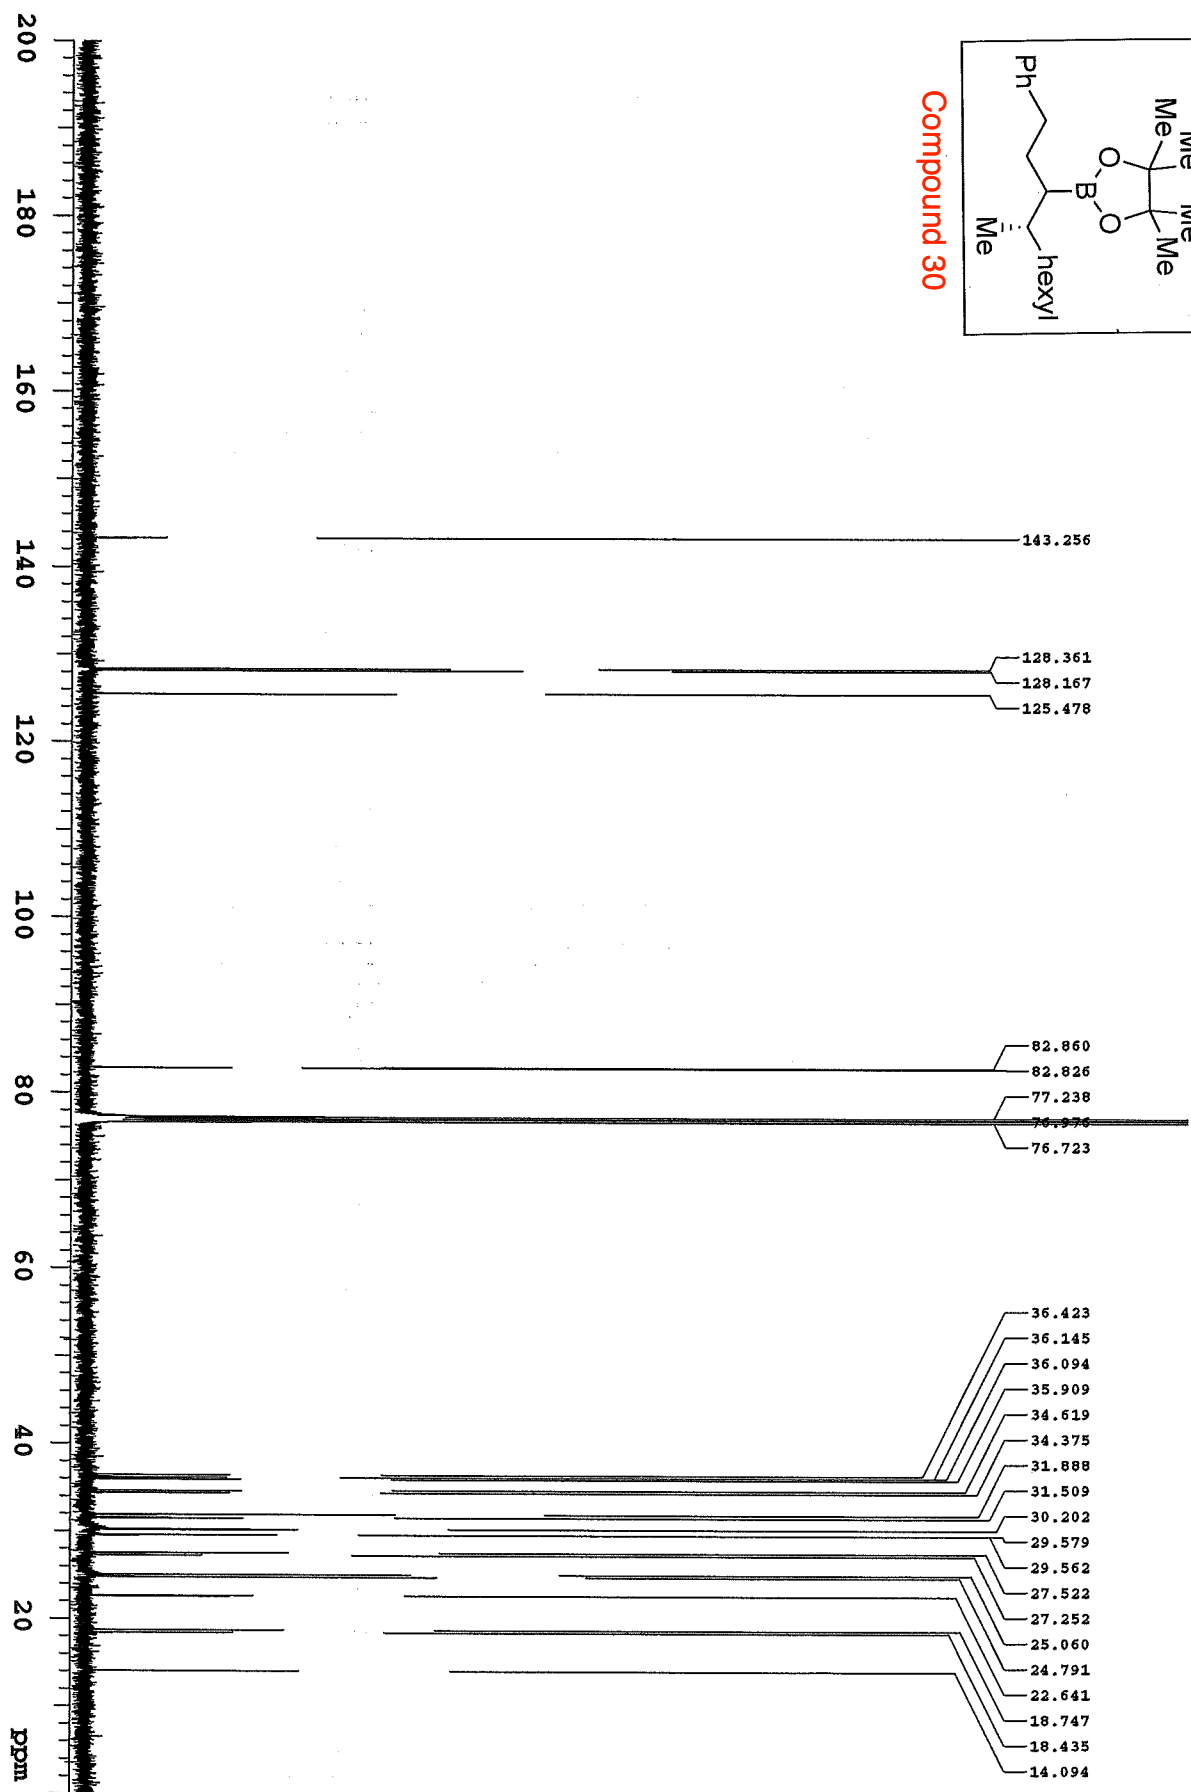

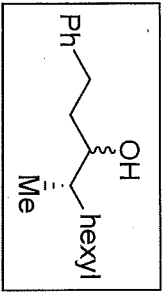

Compound S19

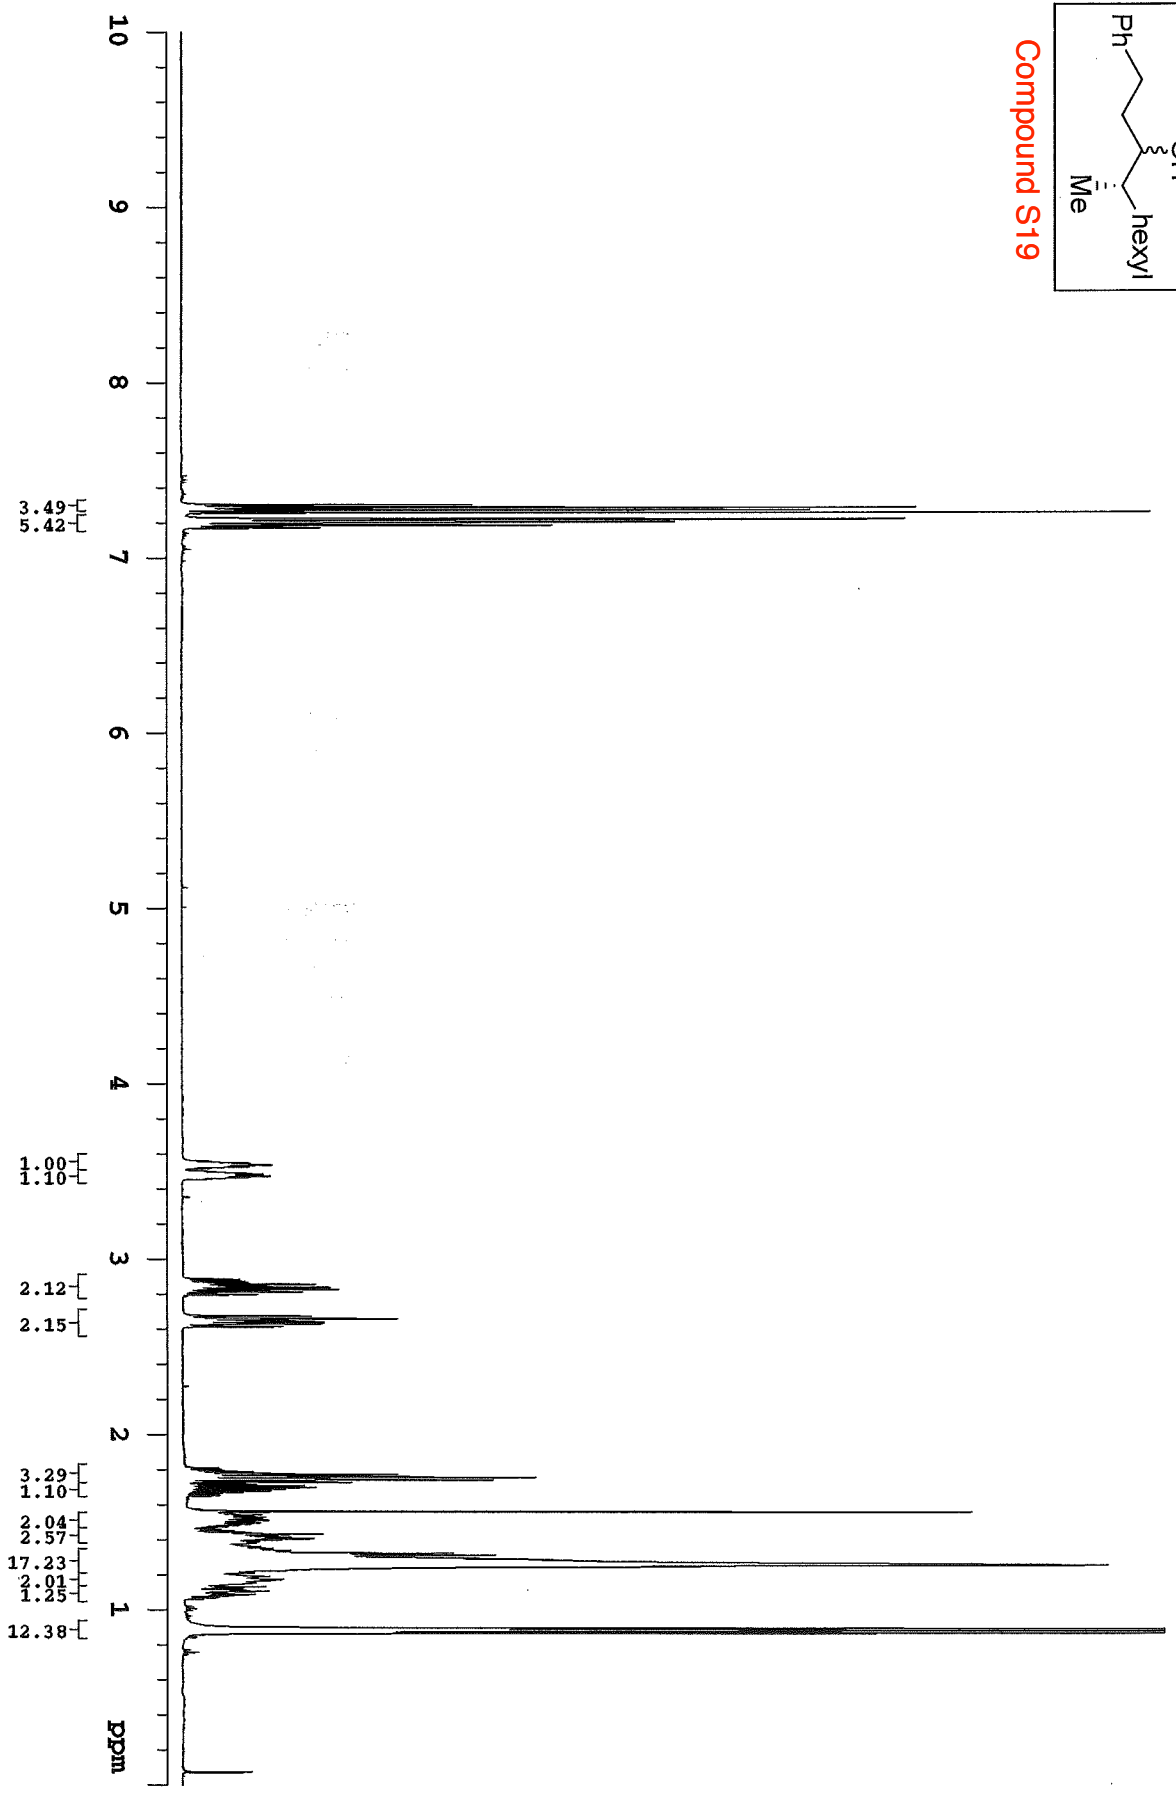

Compound S19

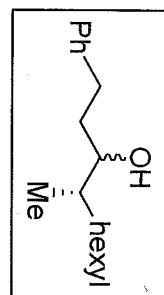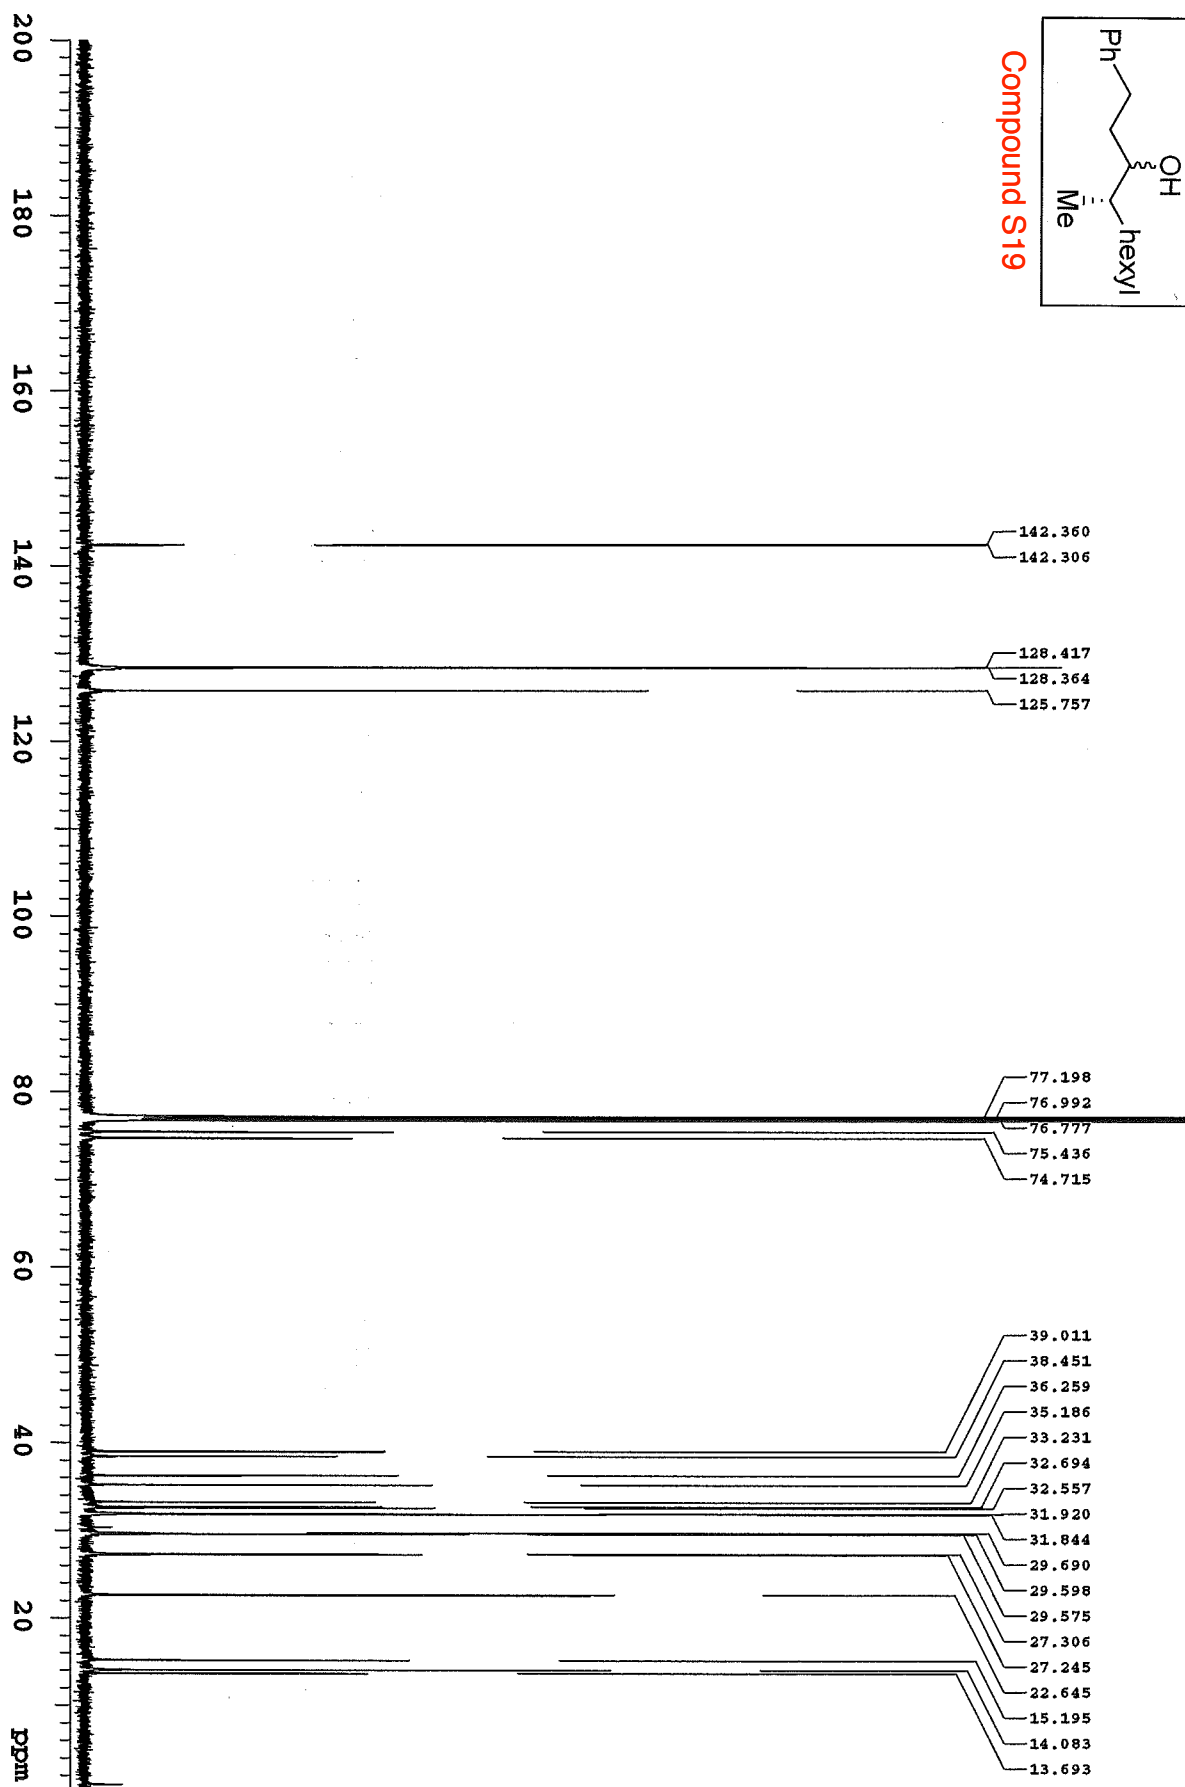

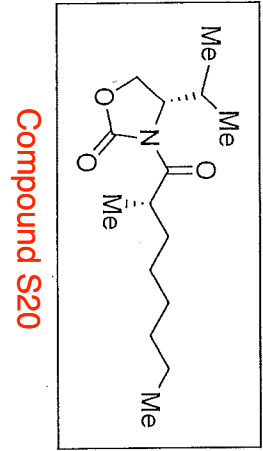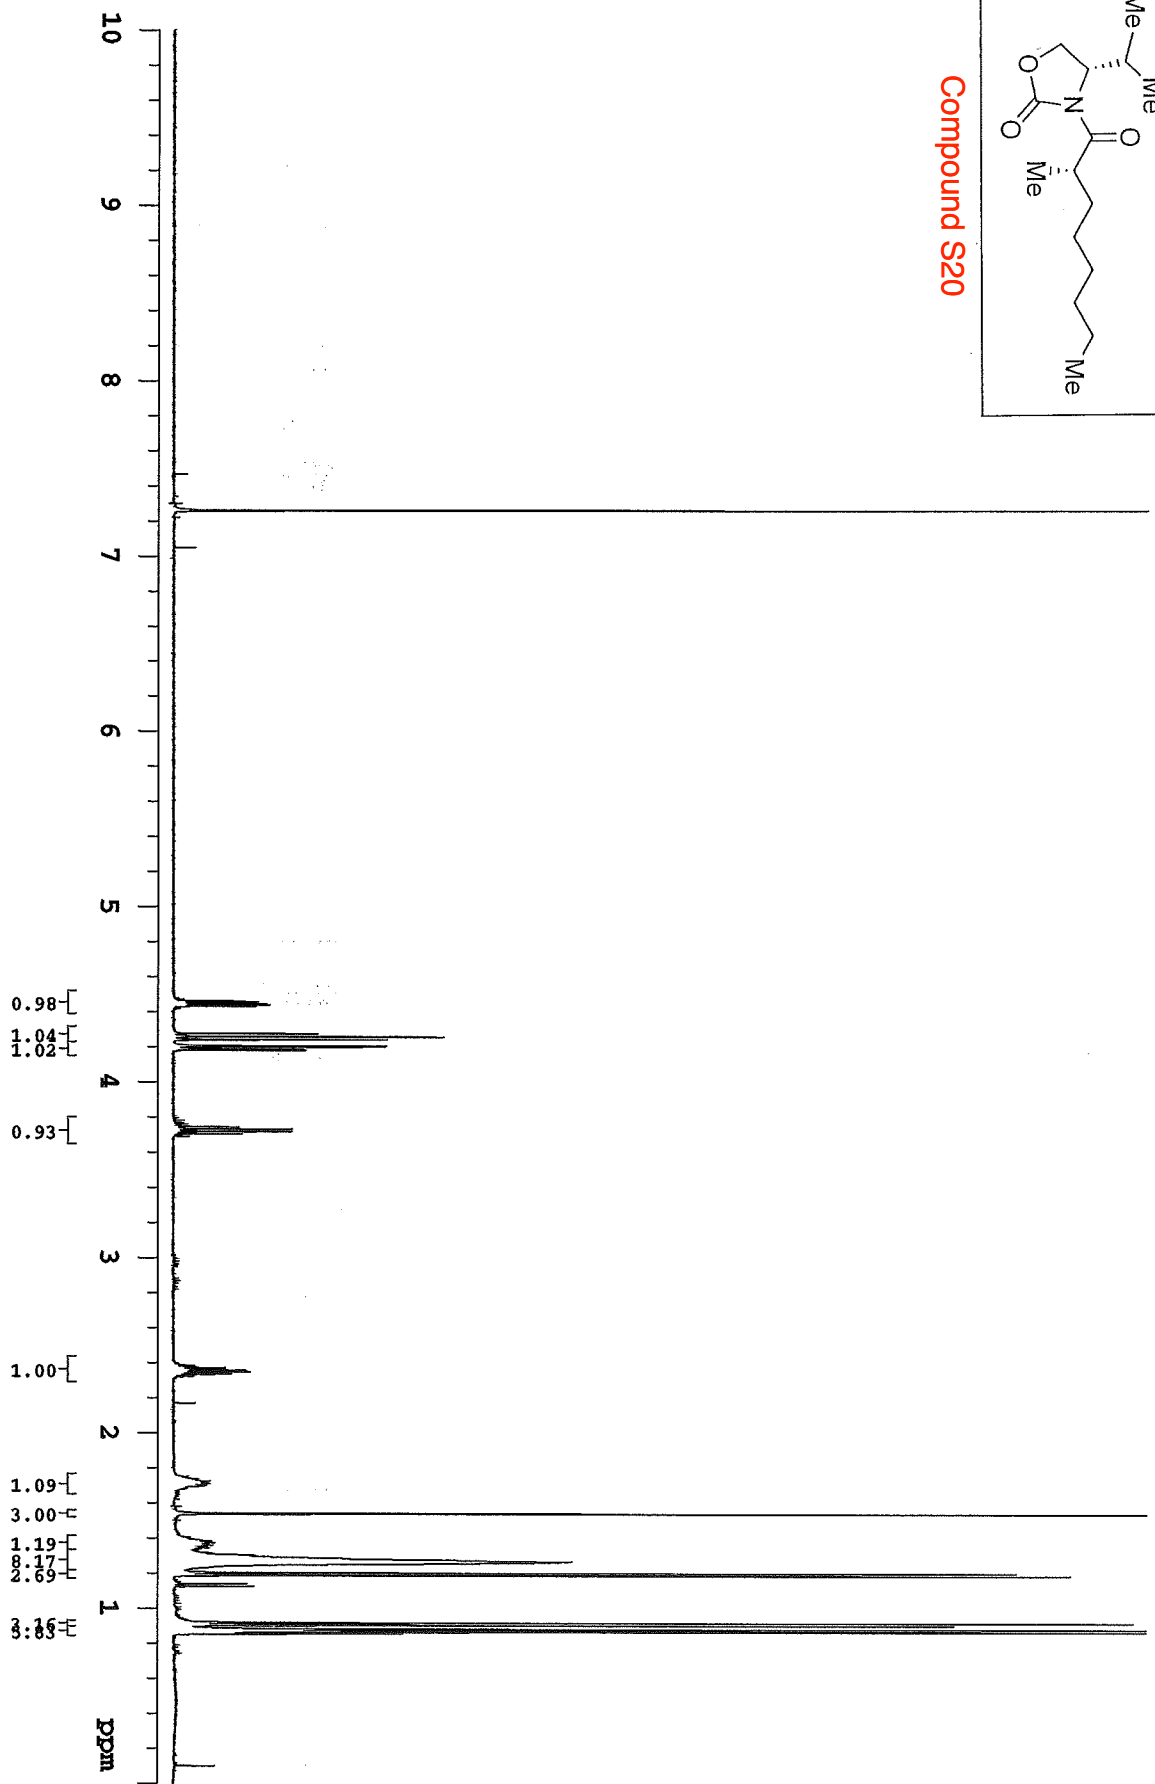

Compound S20

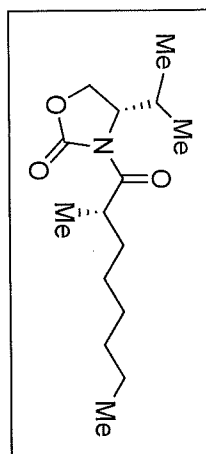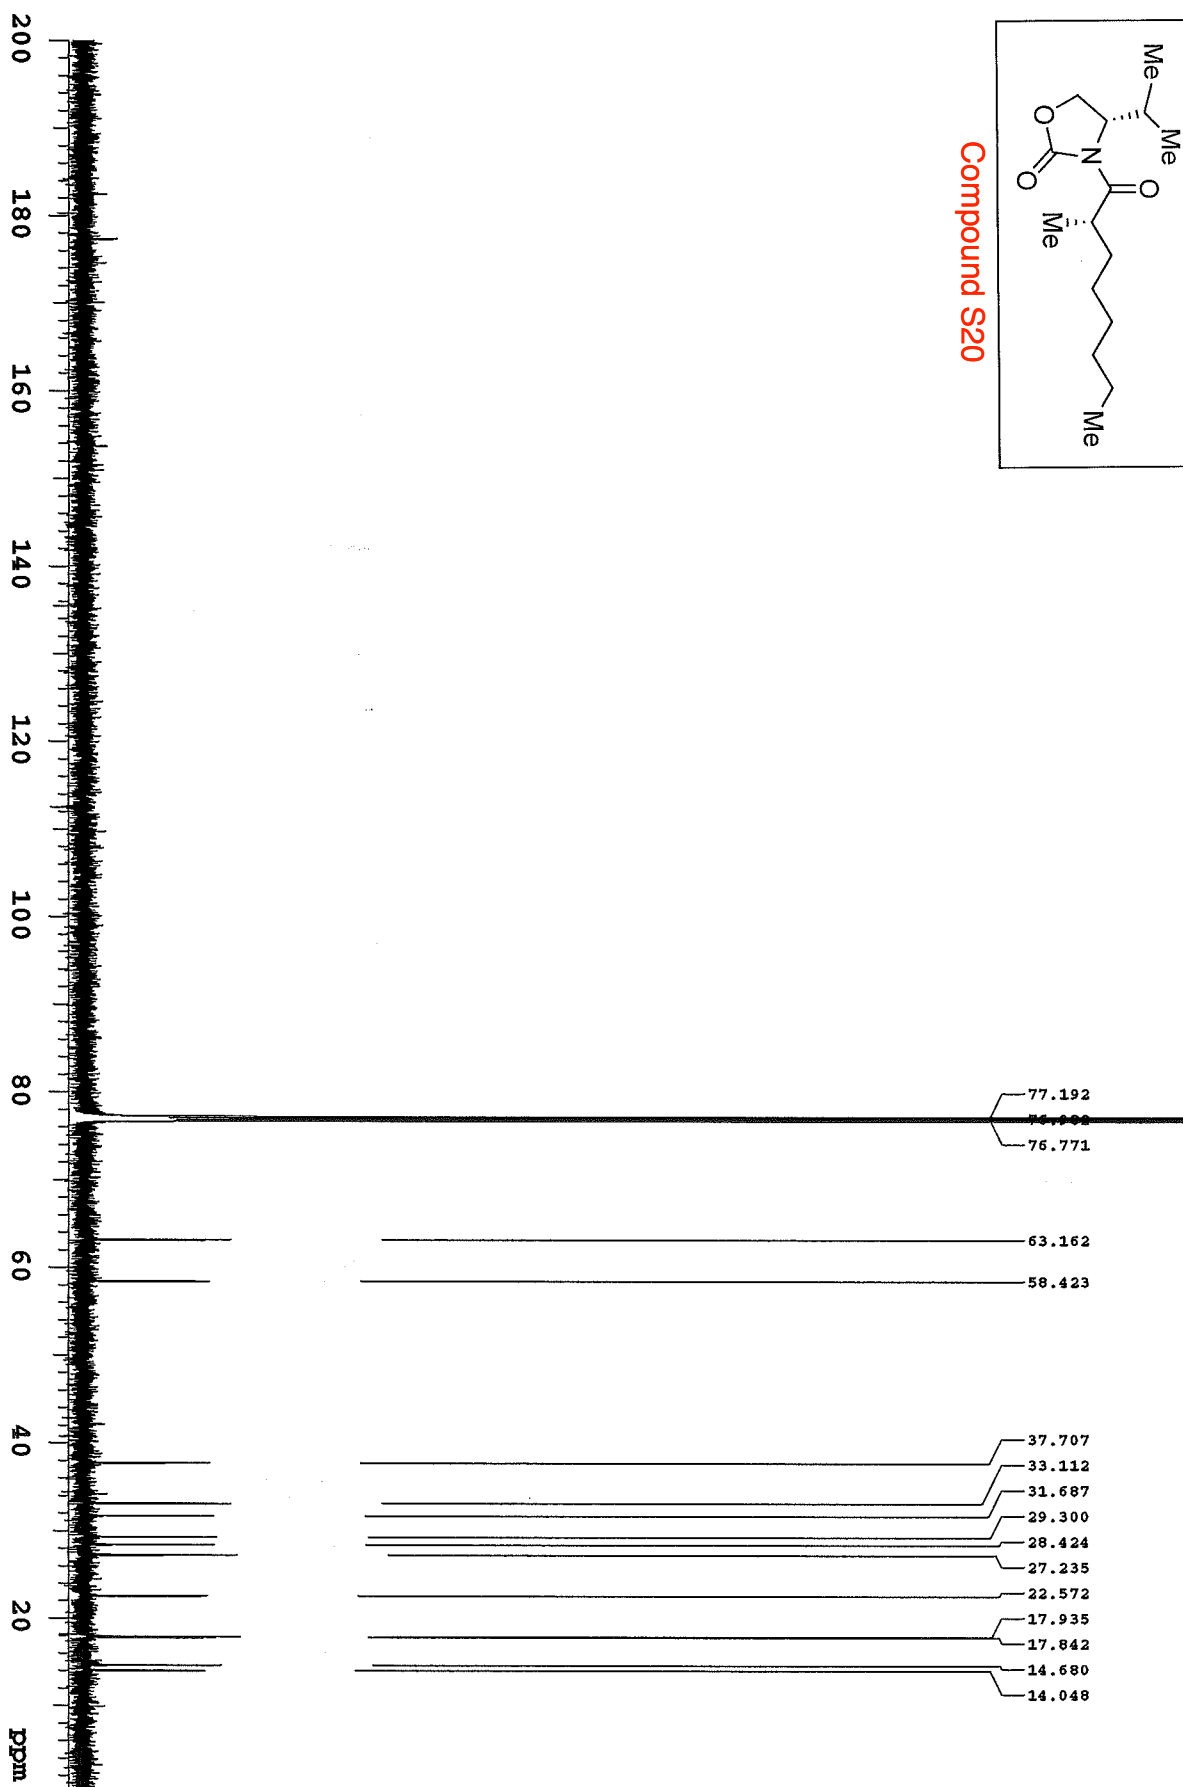

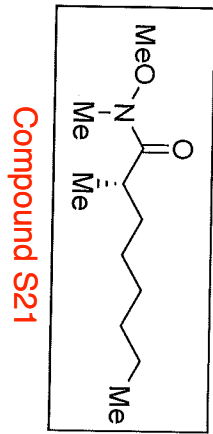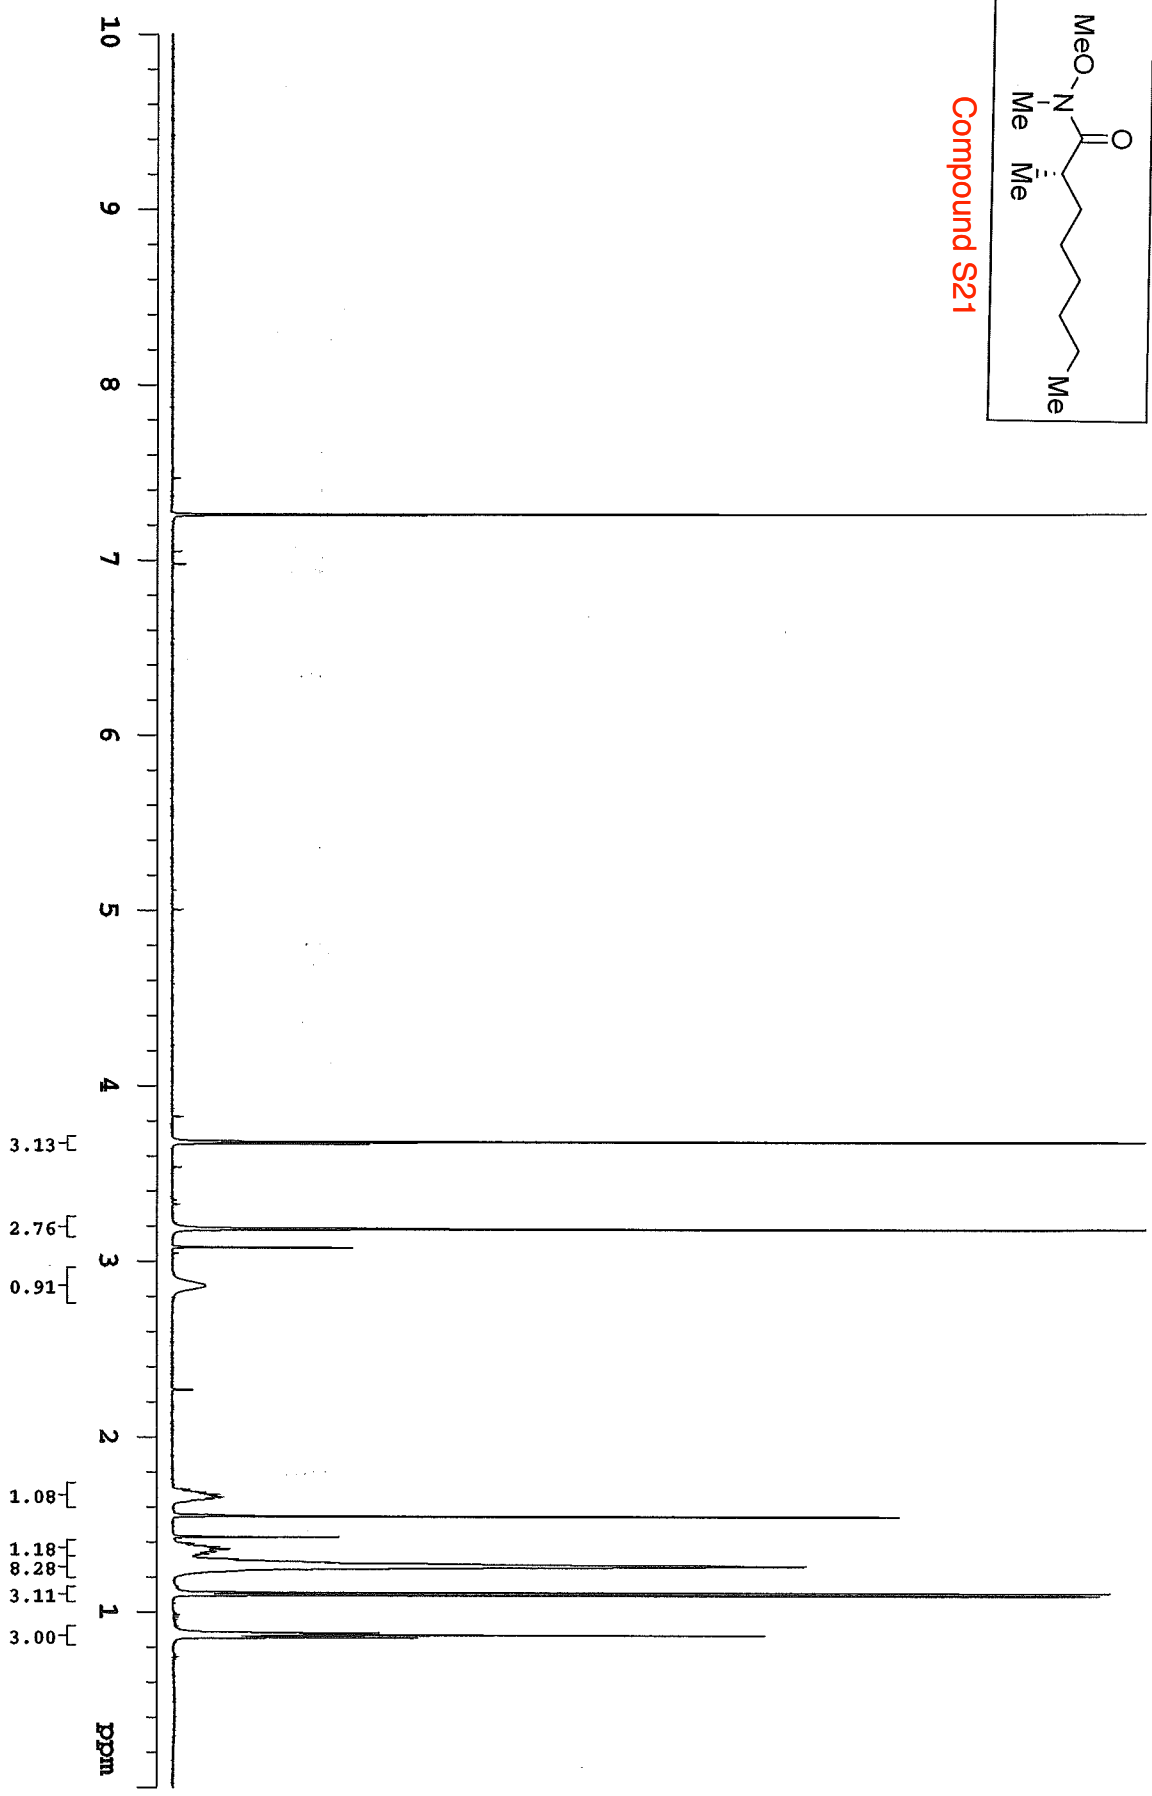

Compound S21

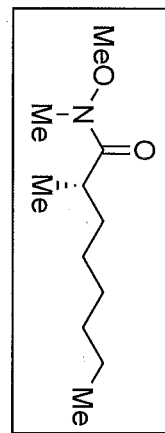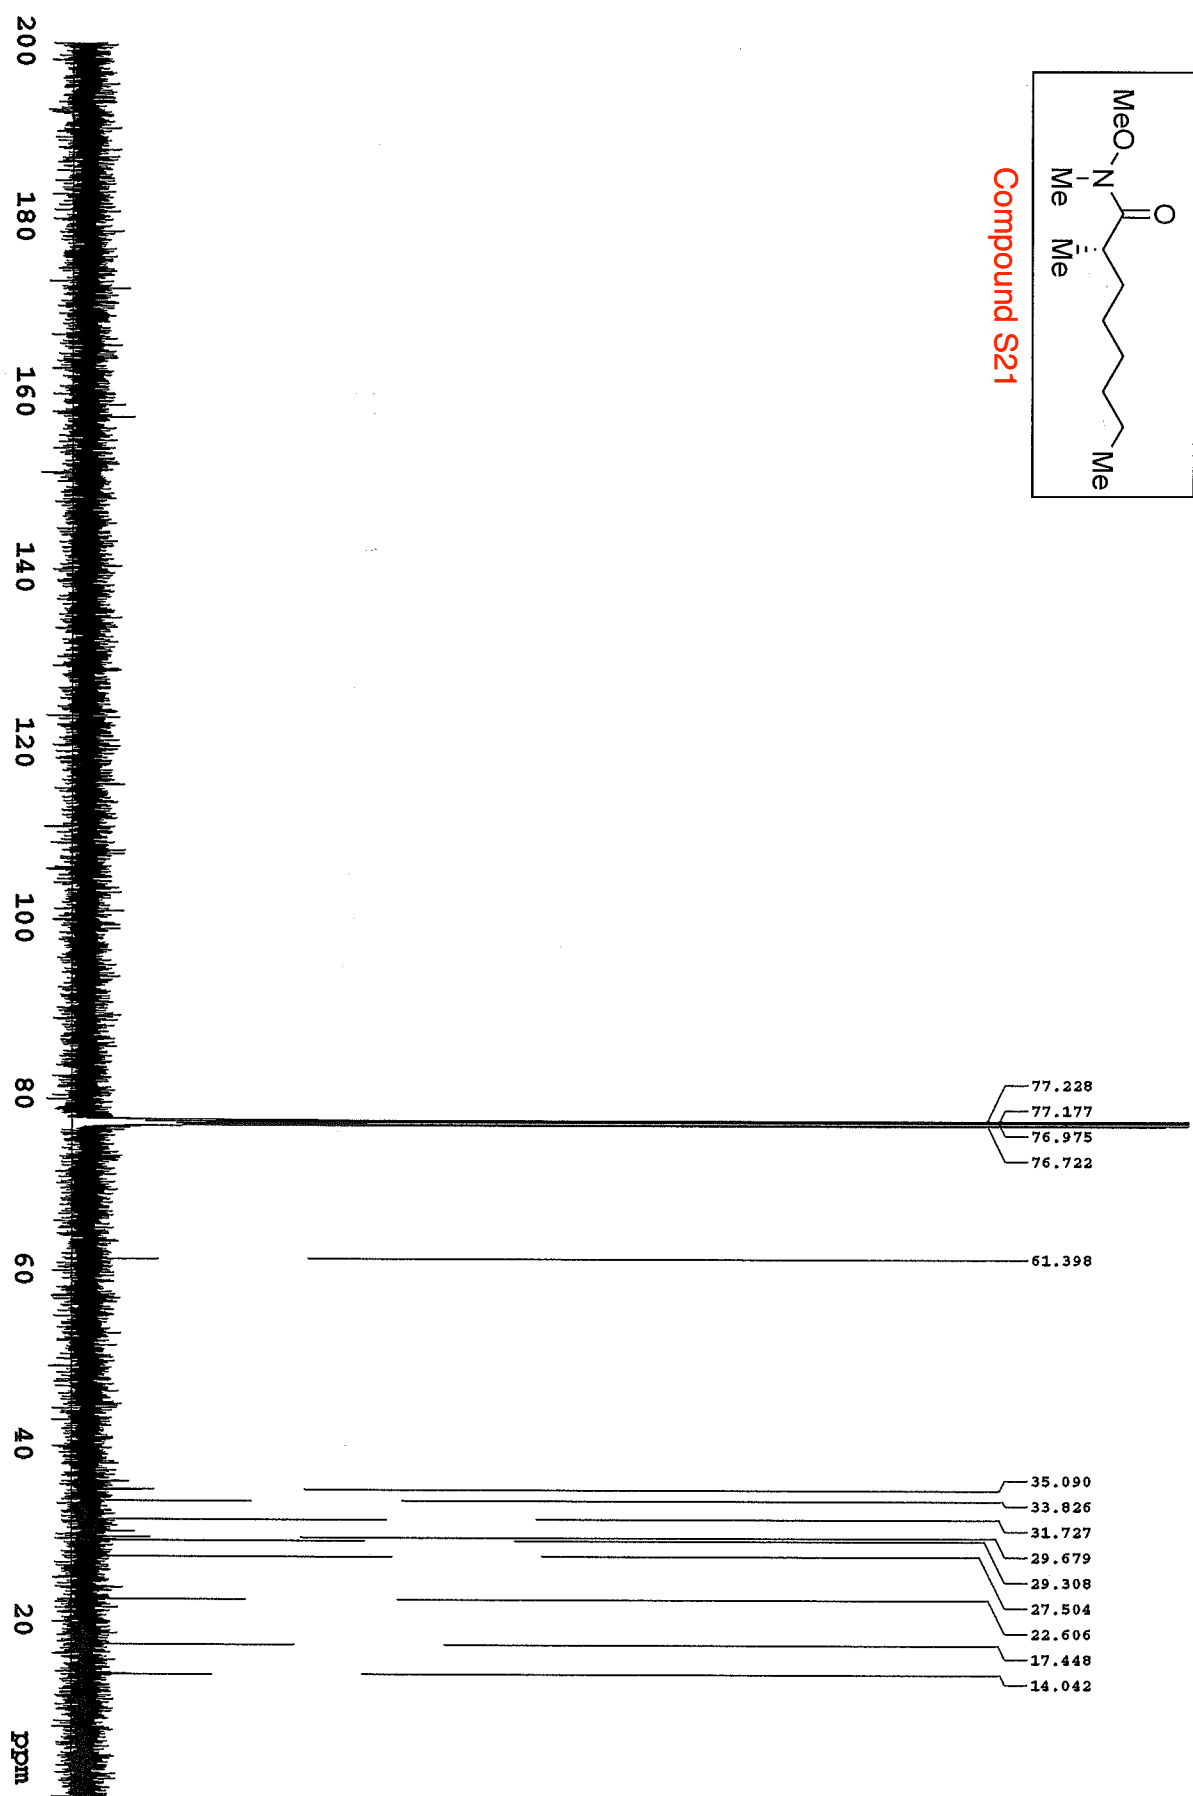



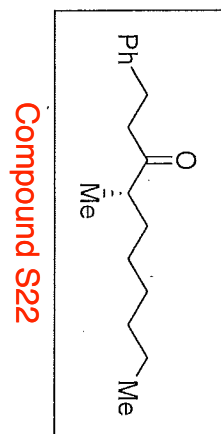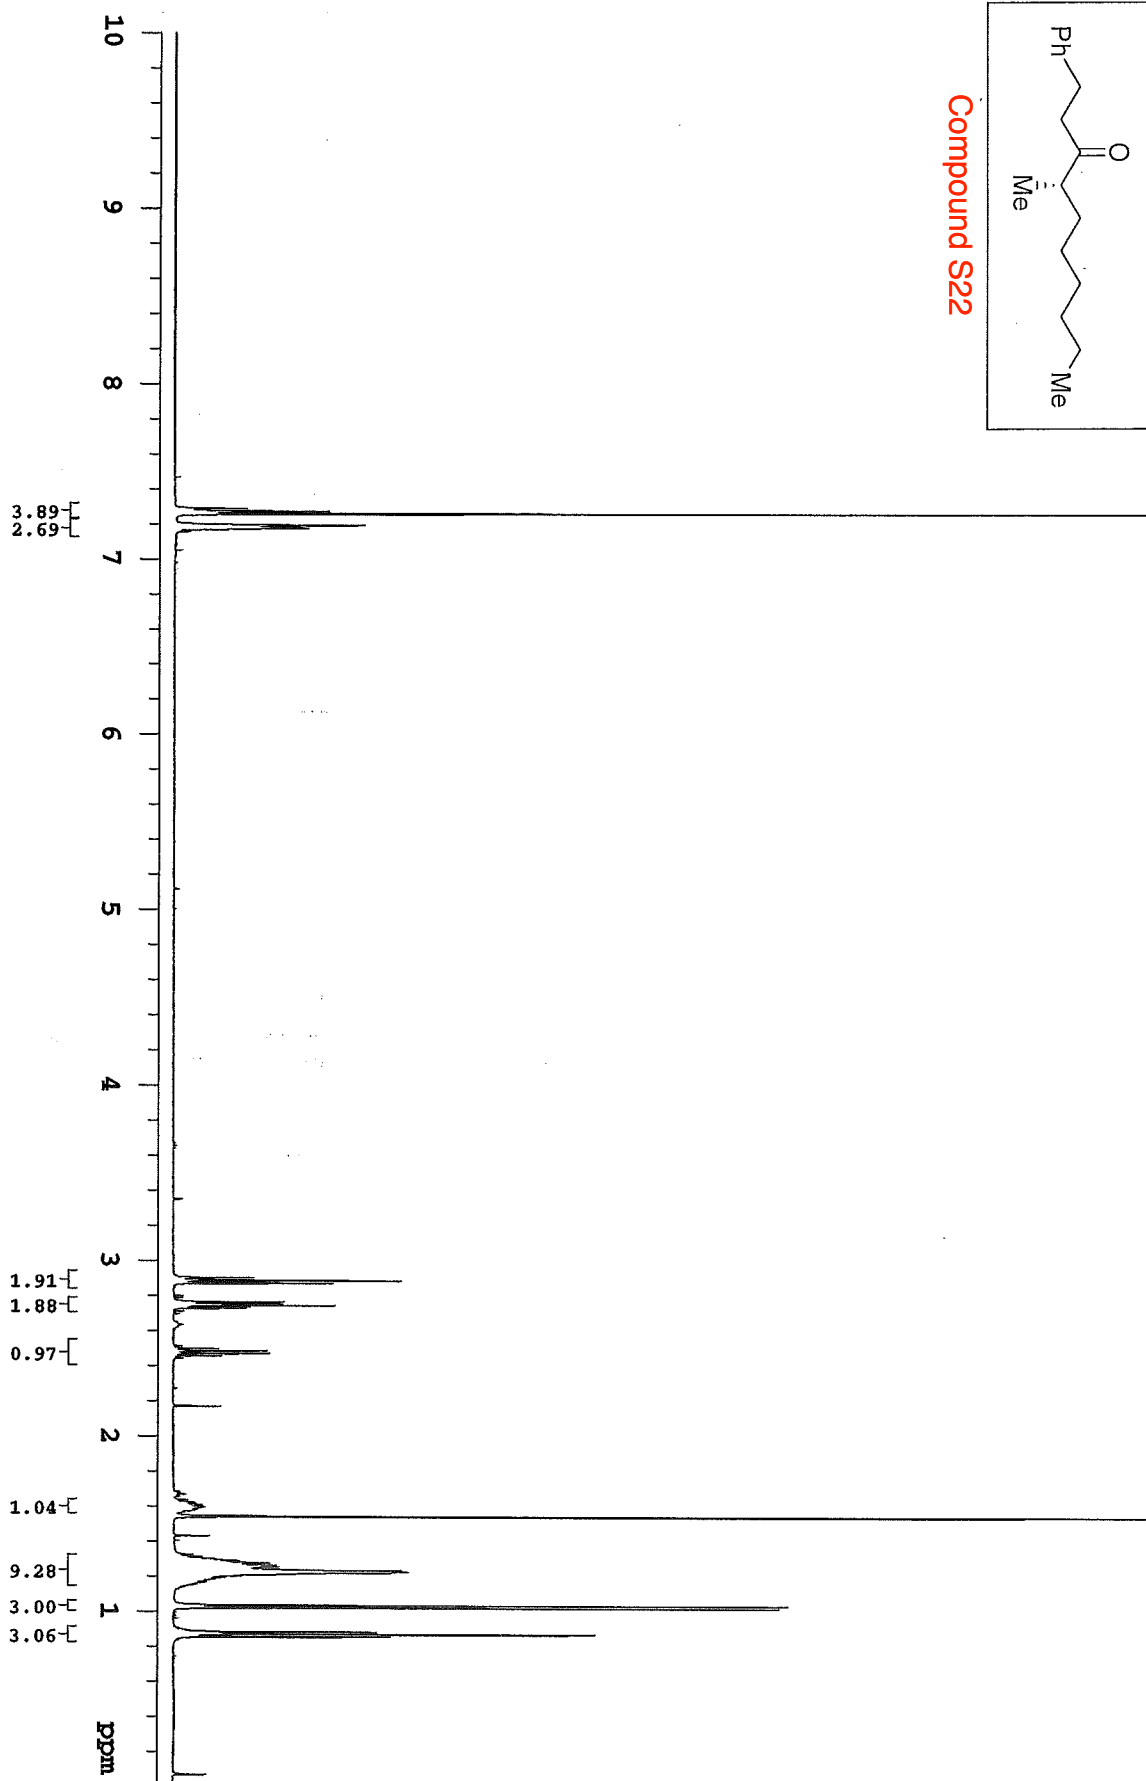

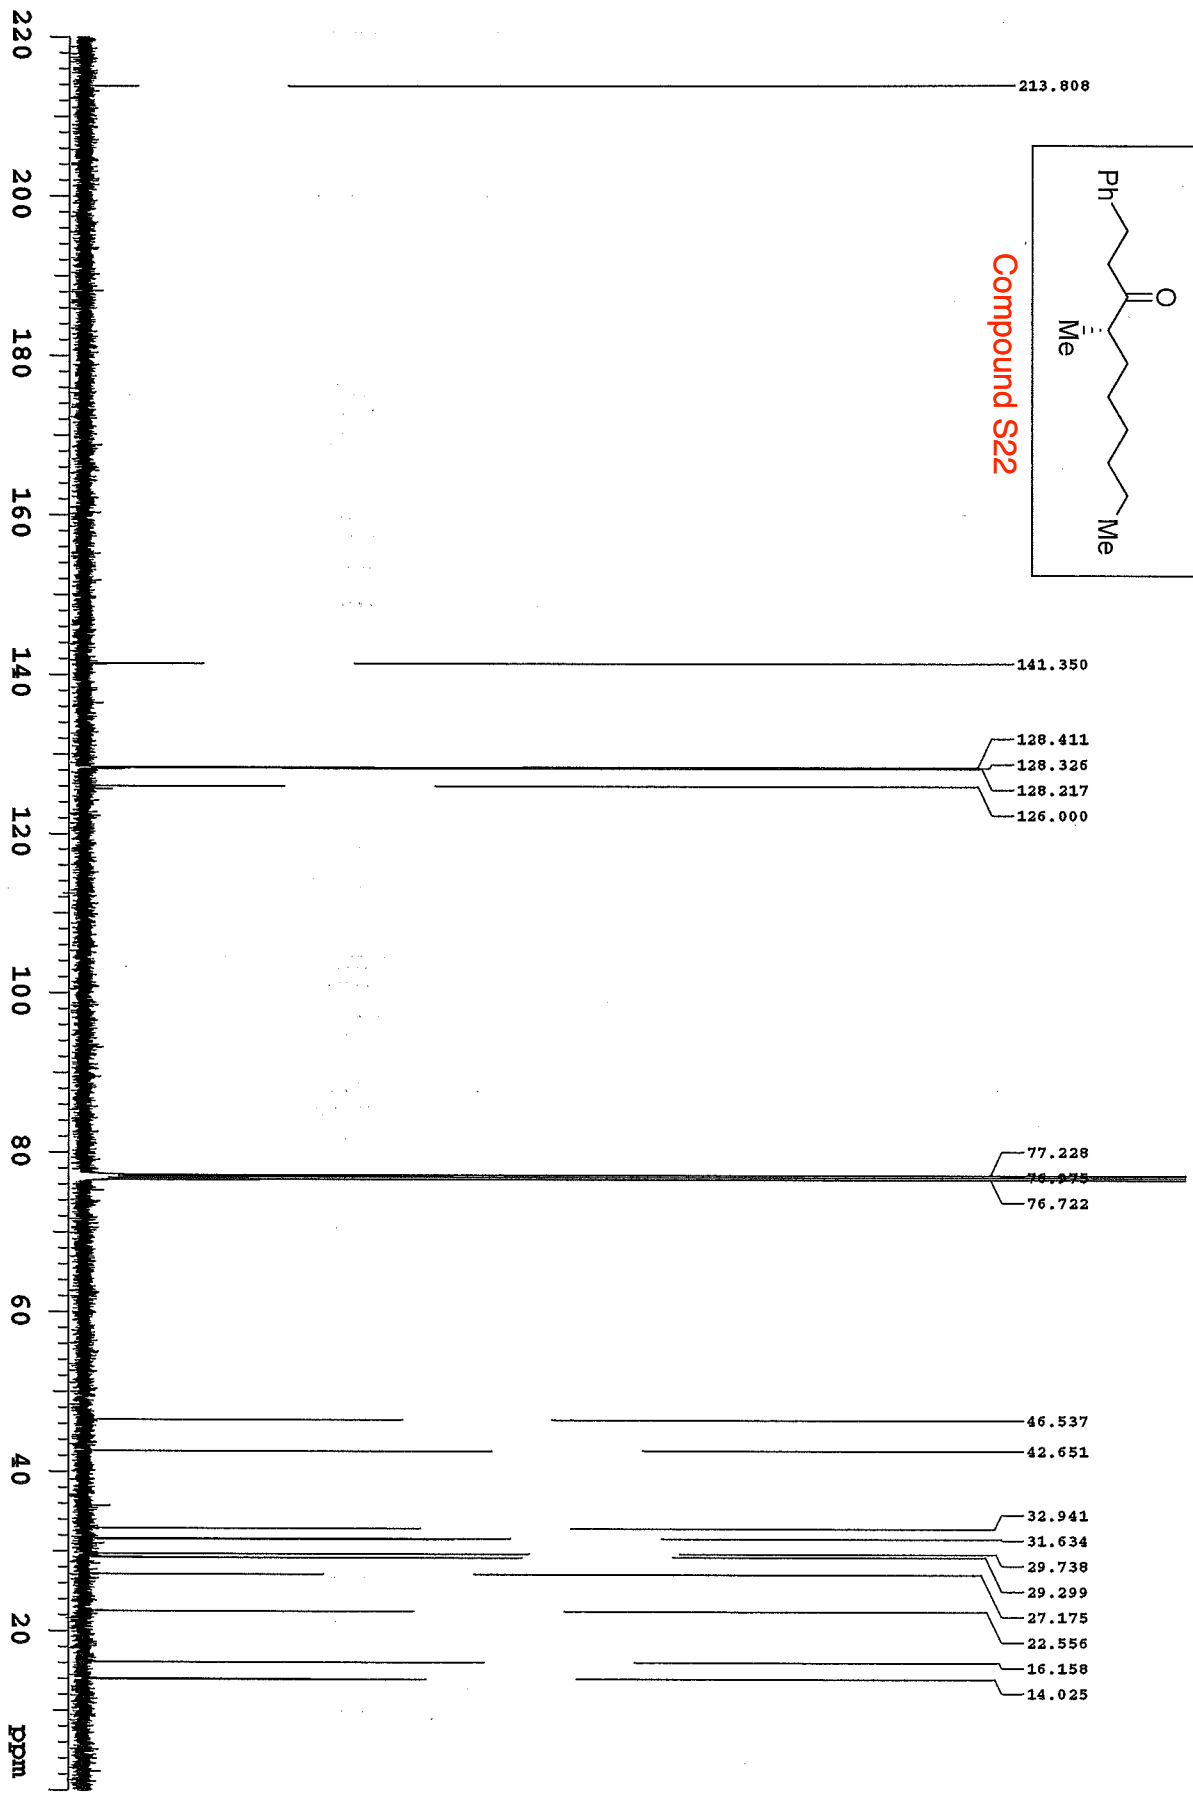

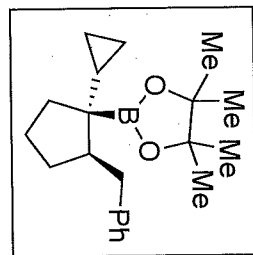

Compound 32

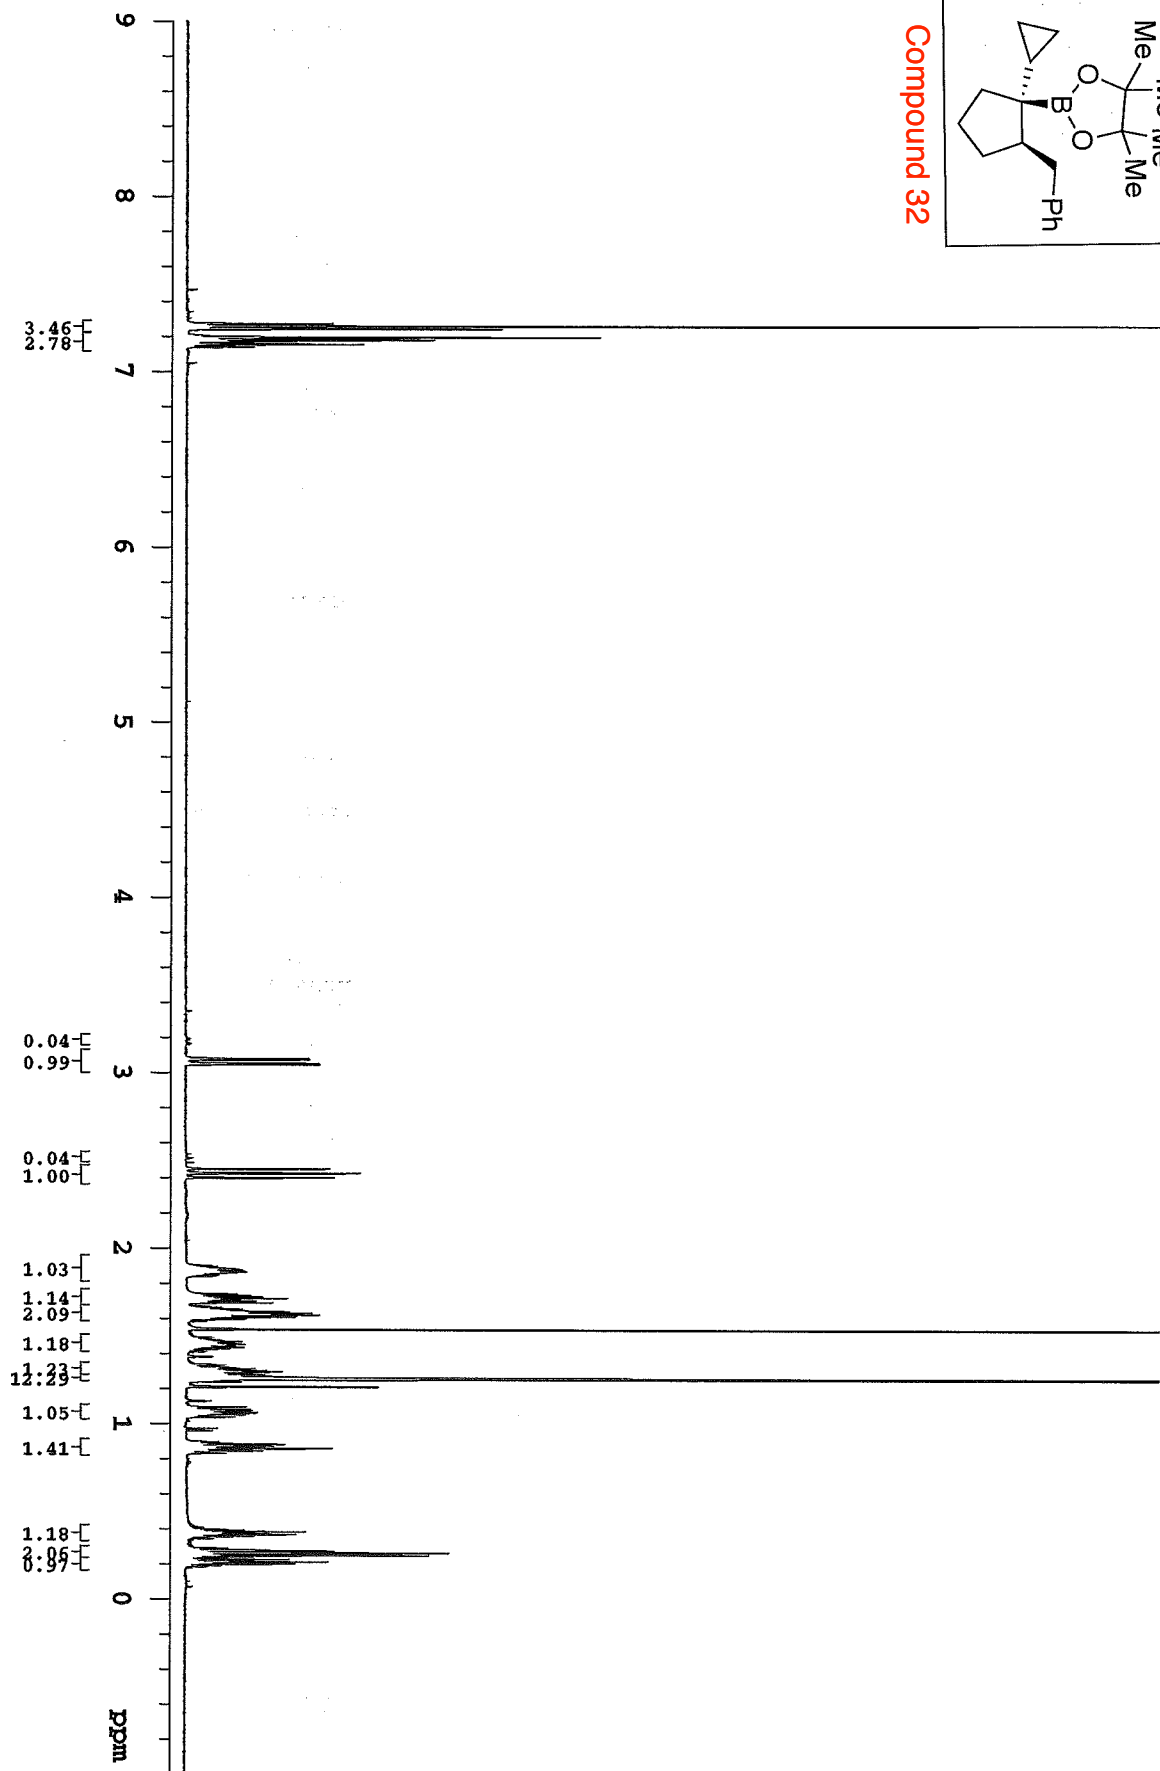

Compound 32

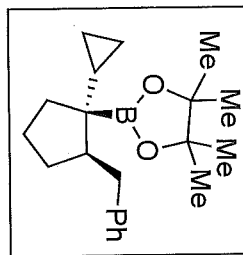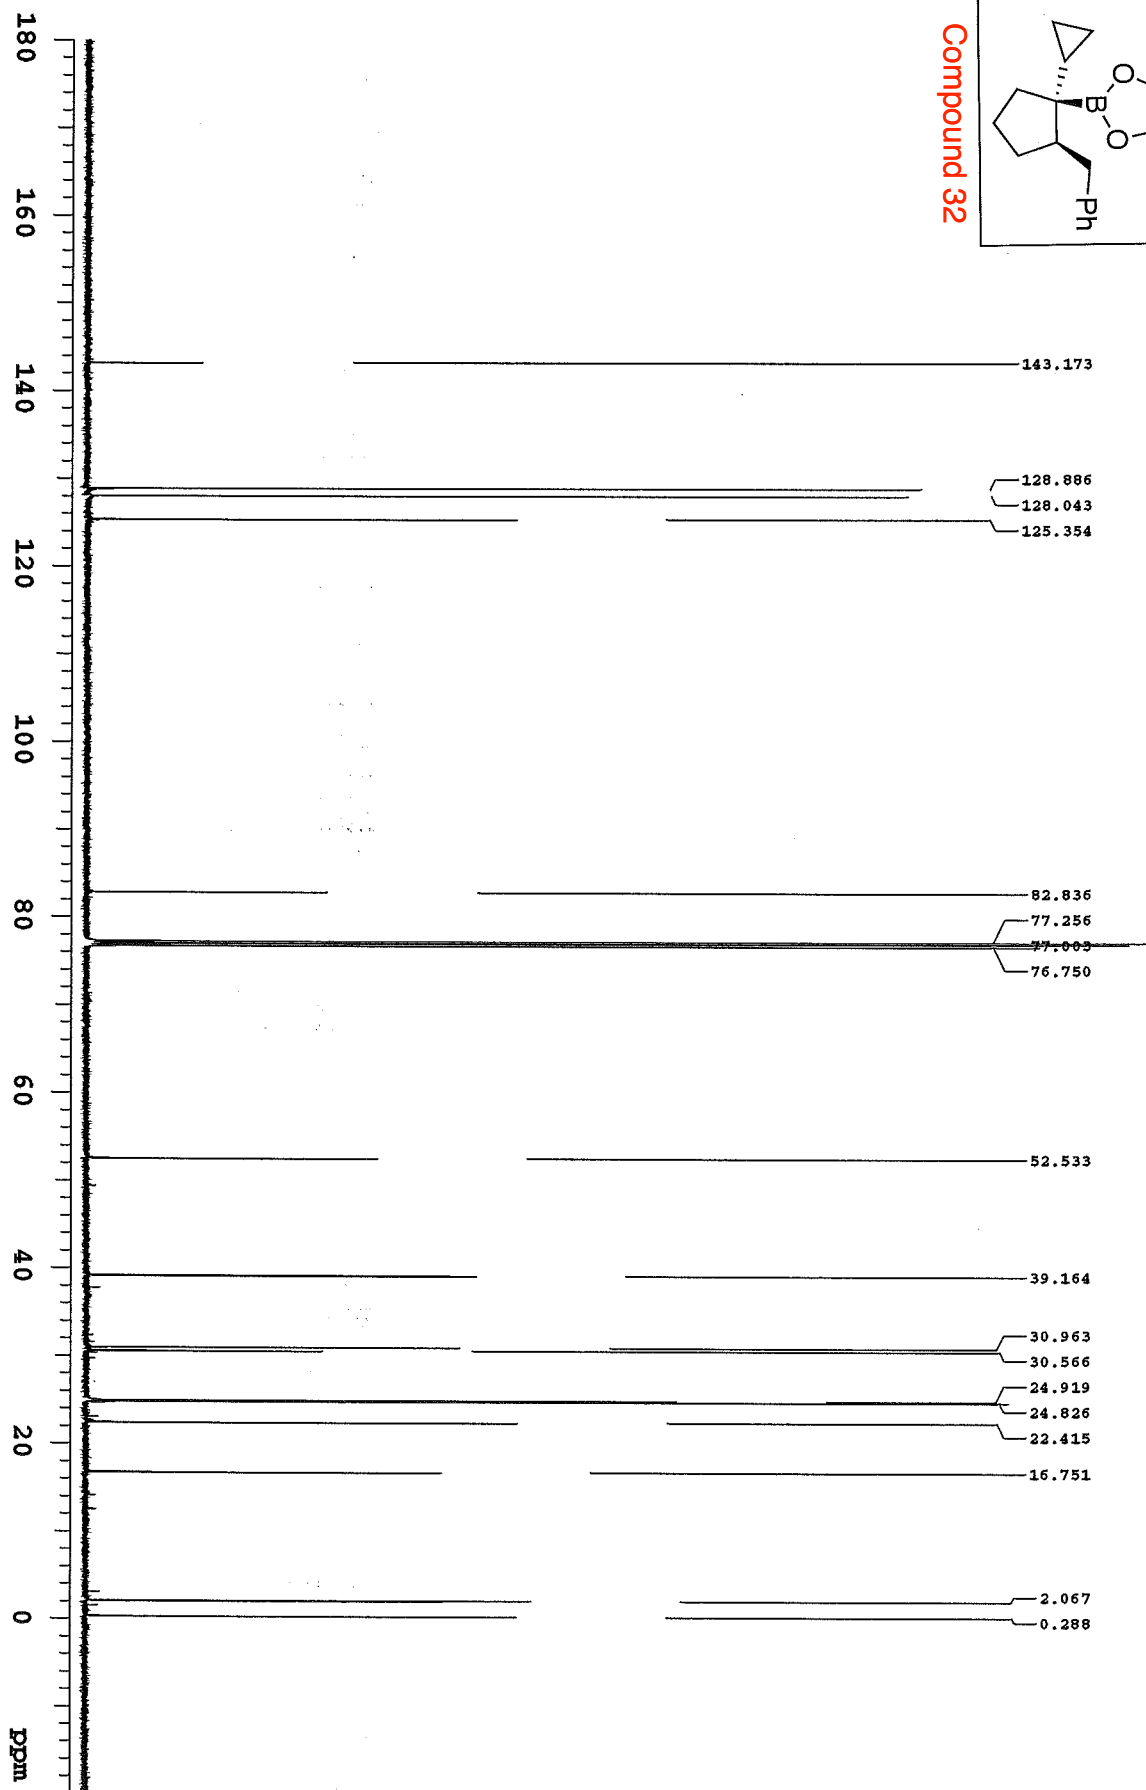

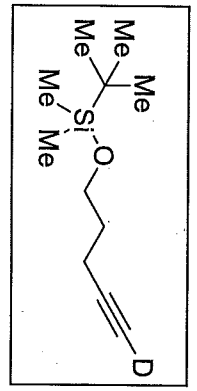

Compound S23

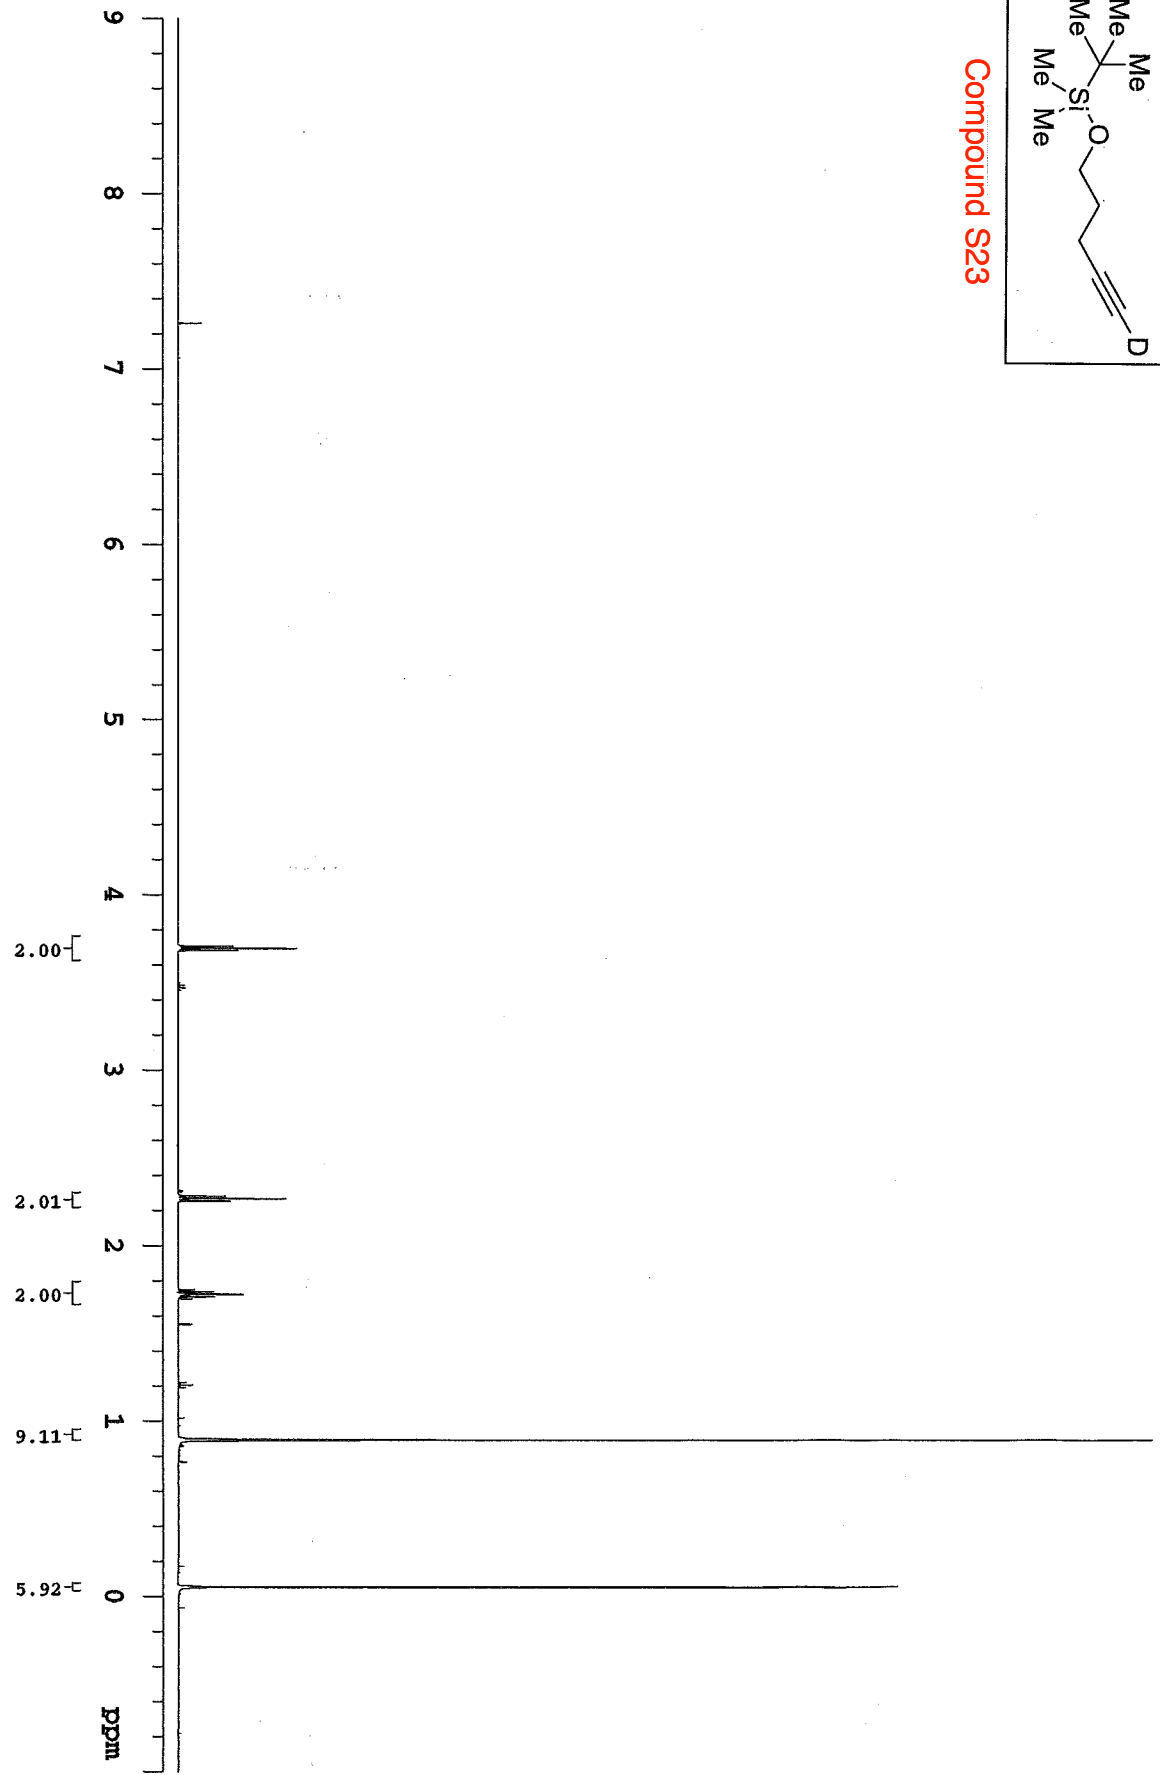

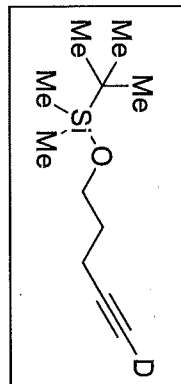

Compound S23

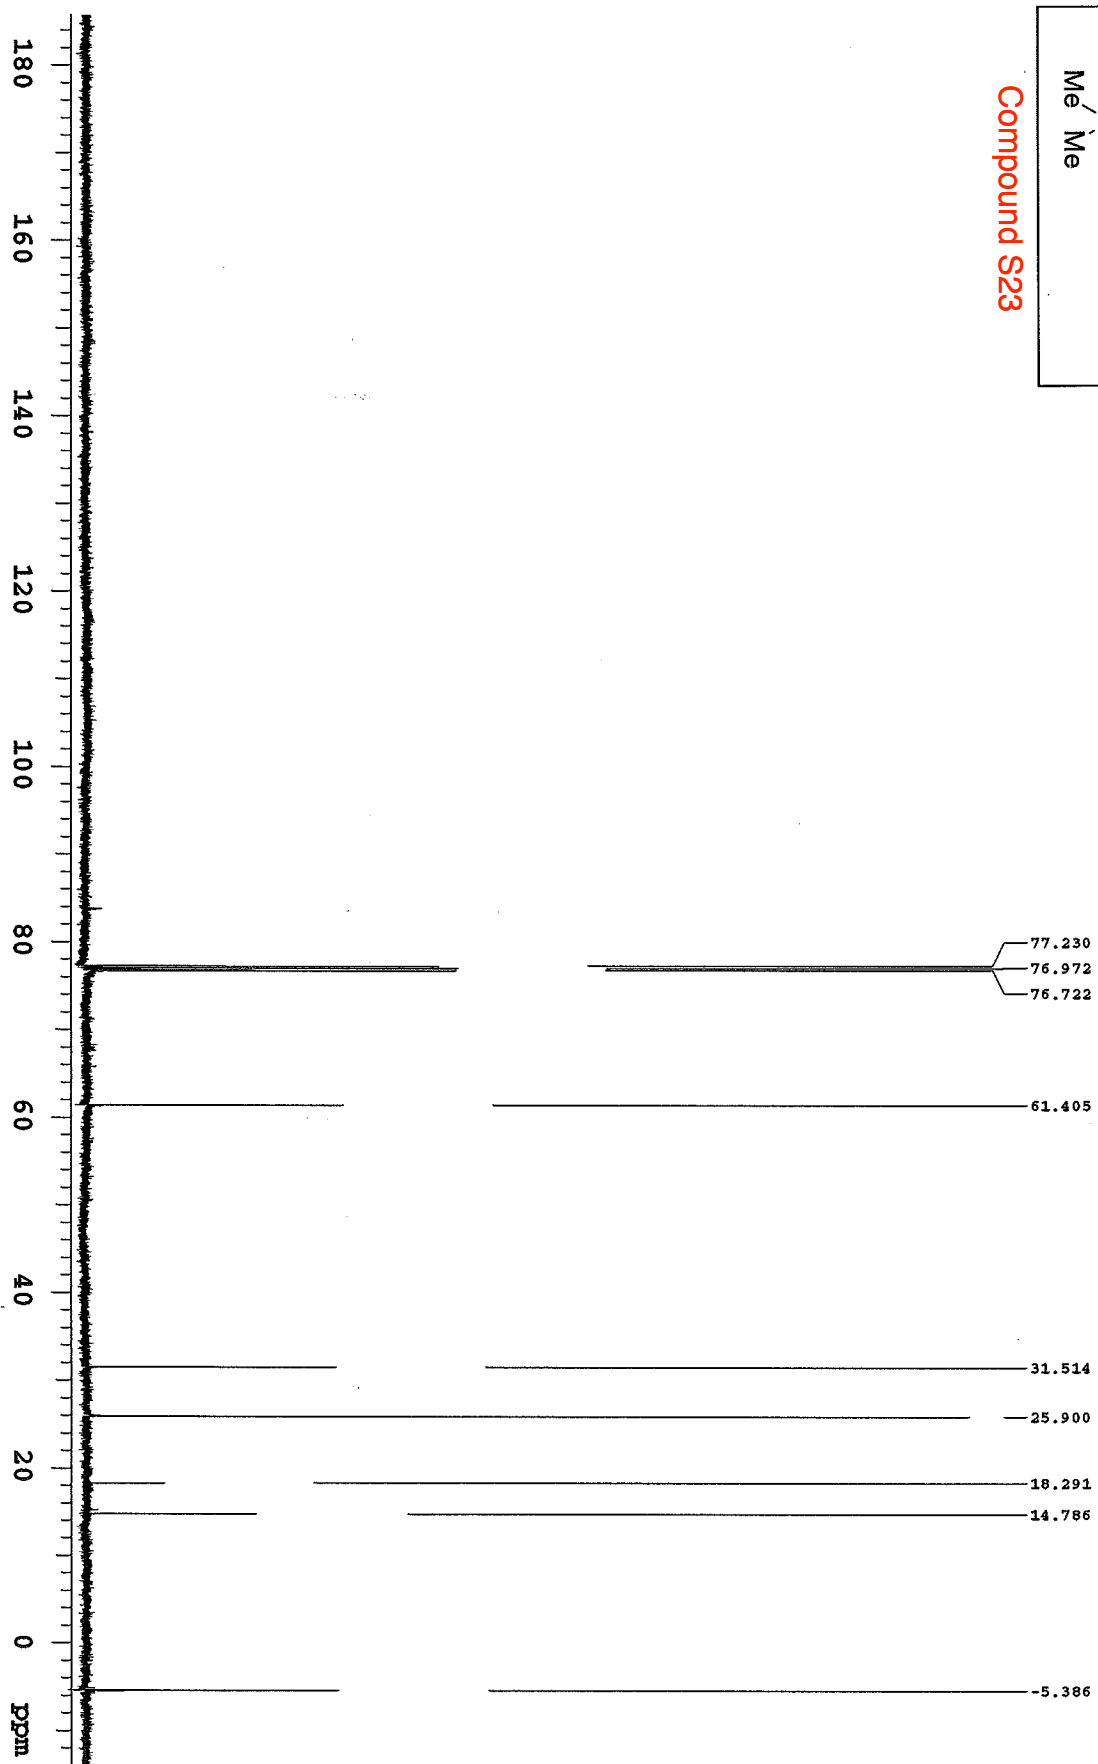

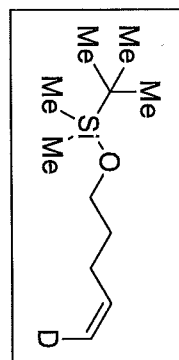

Compound S24

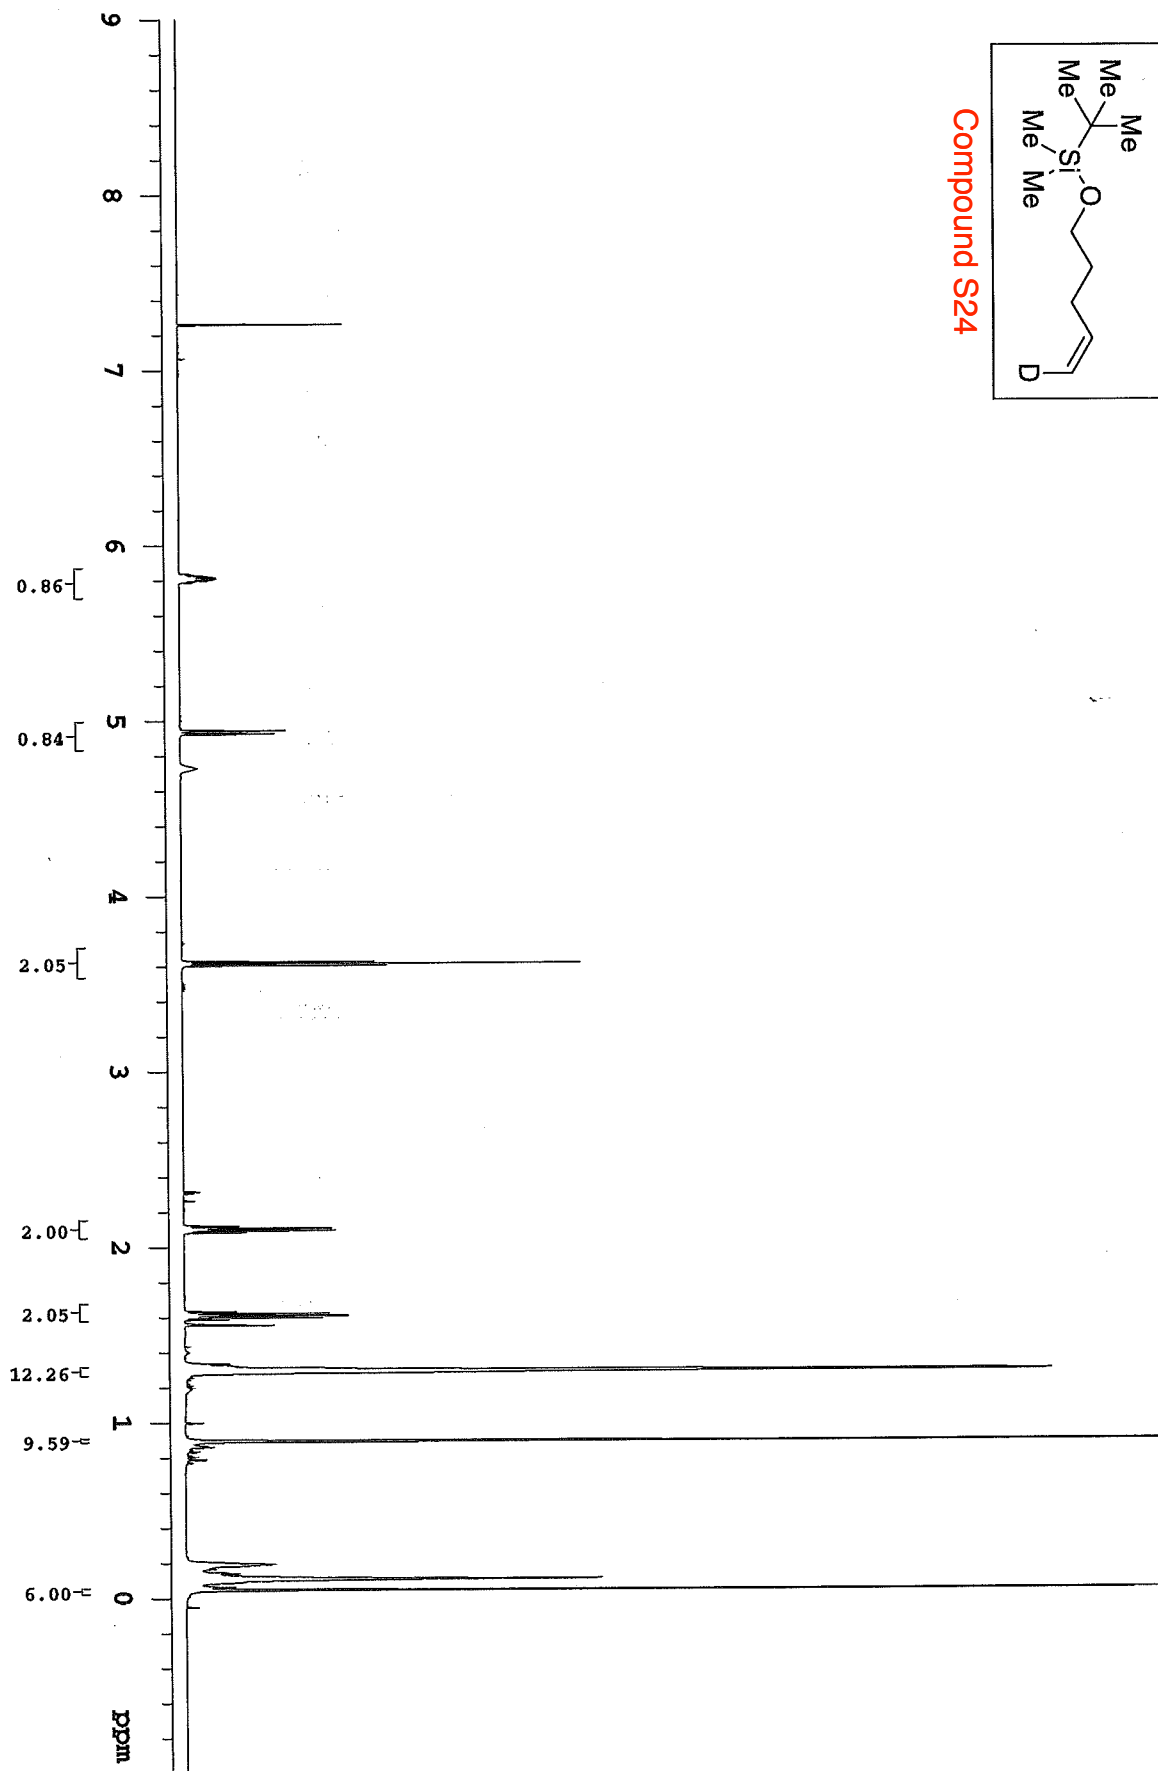

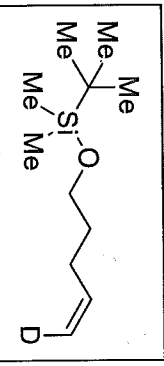

Compound S24

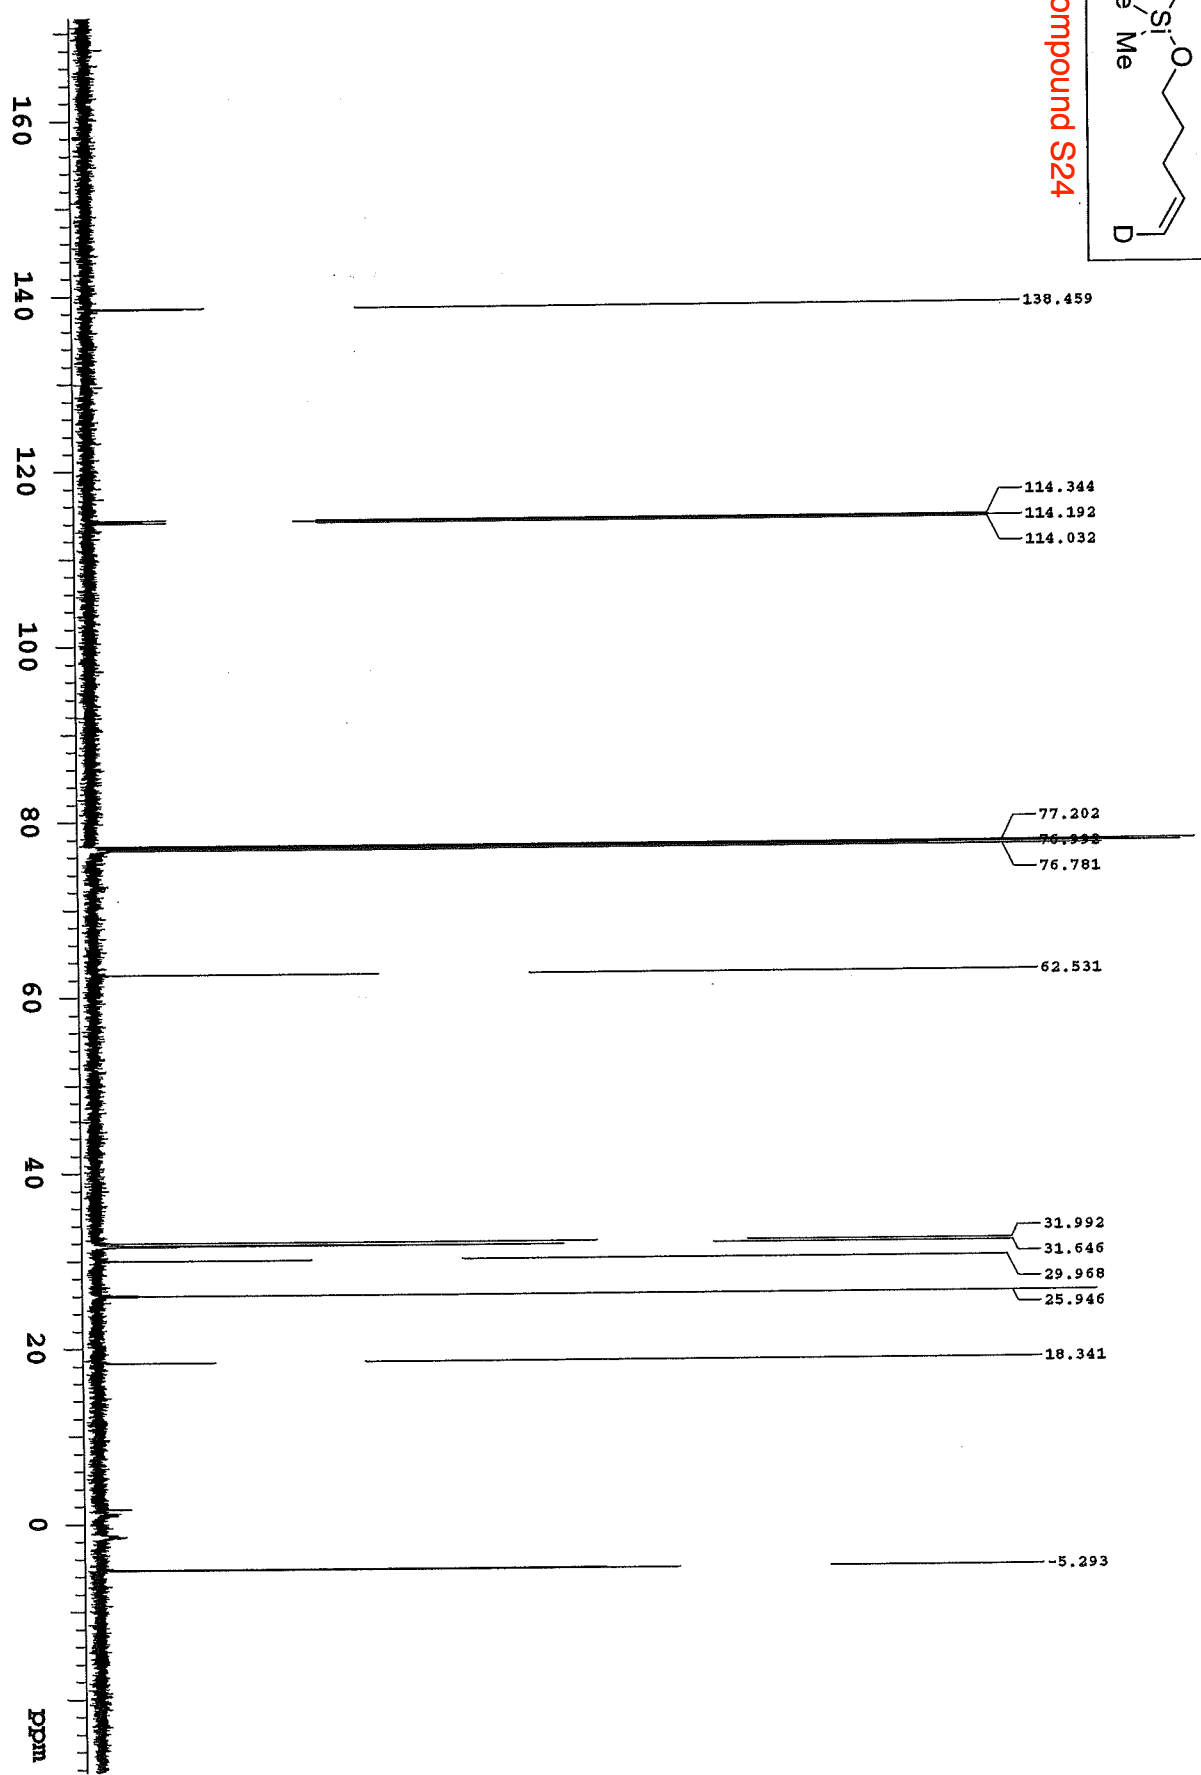



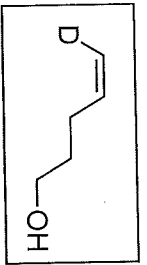

Compound S25

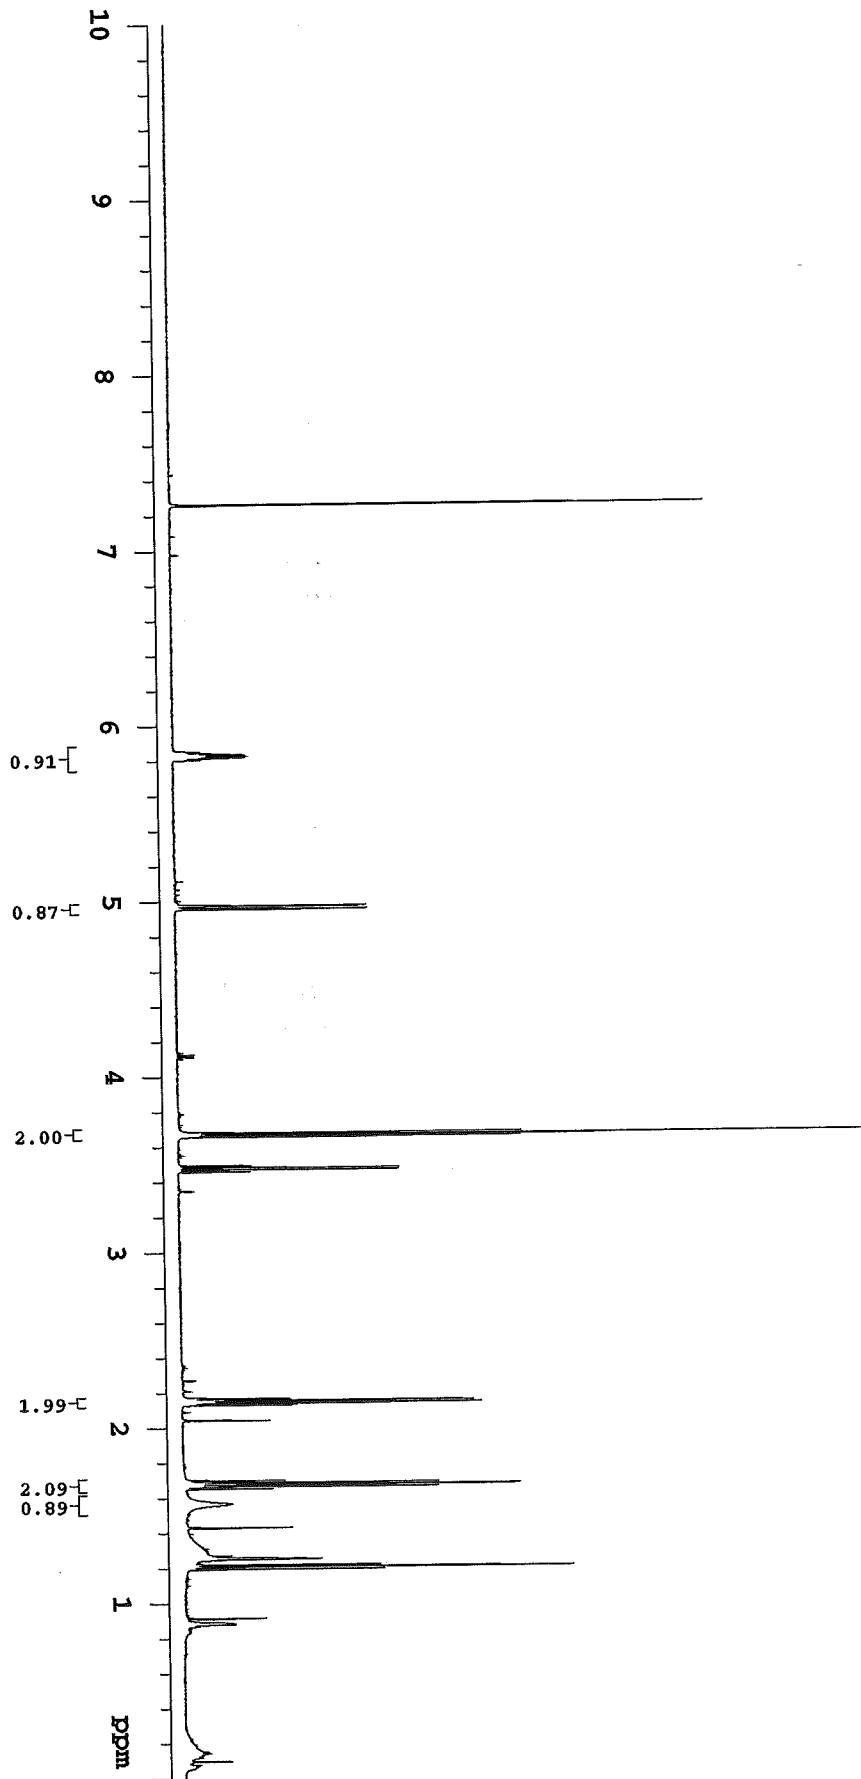

Compound S25

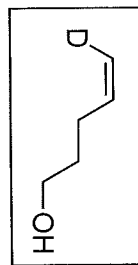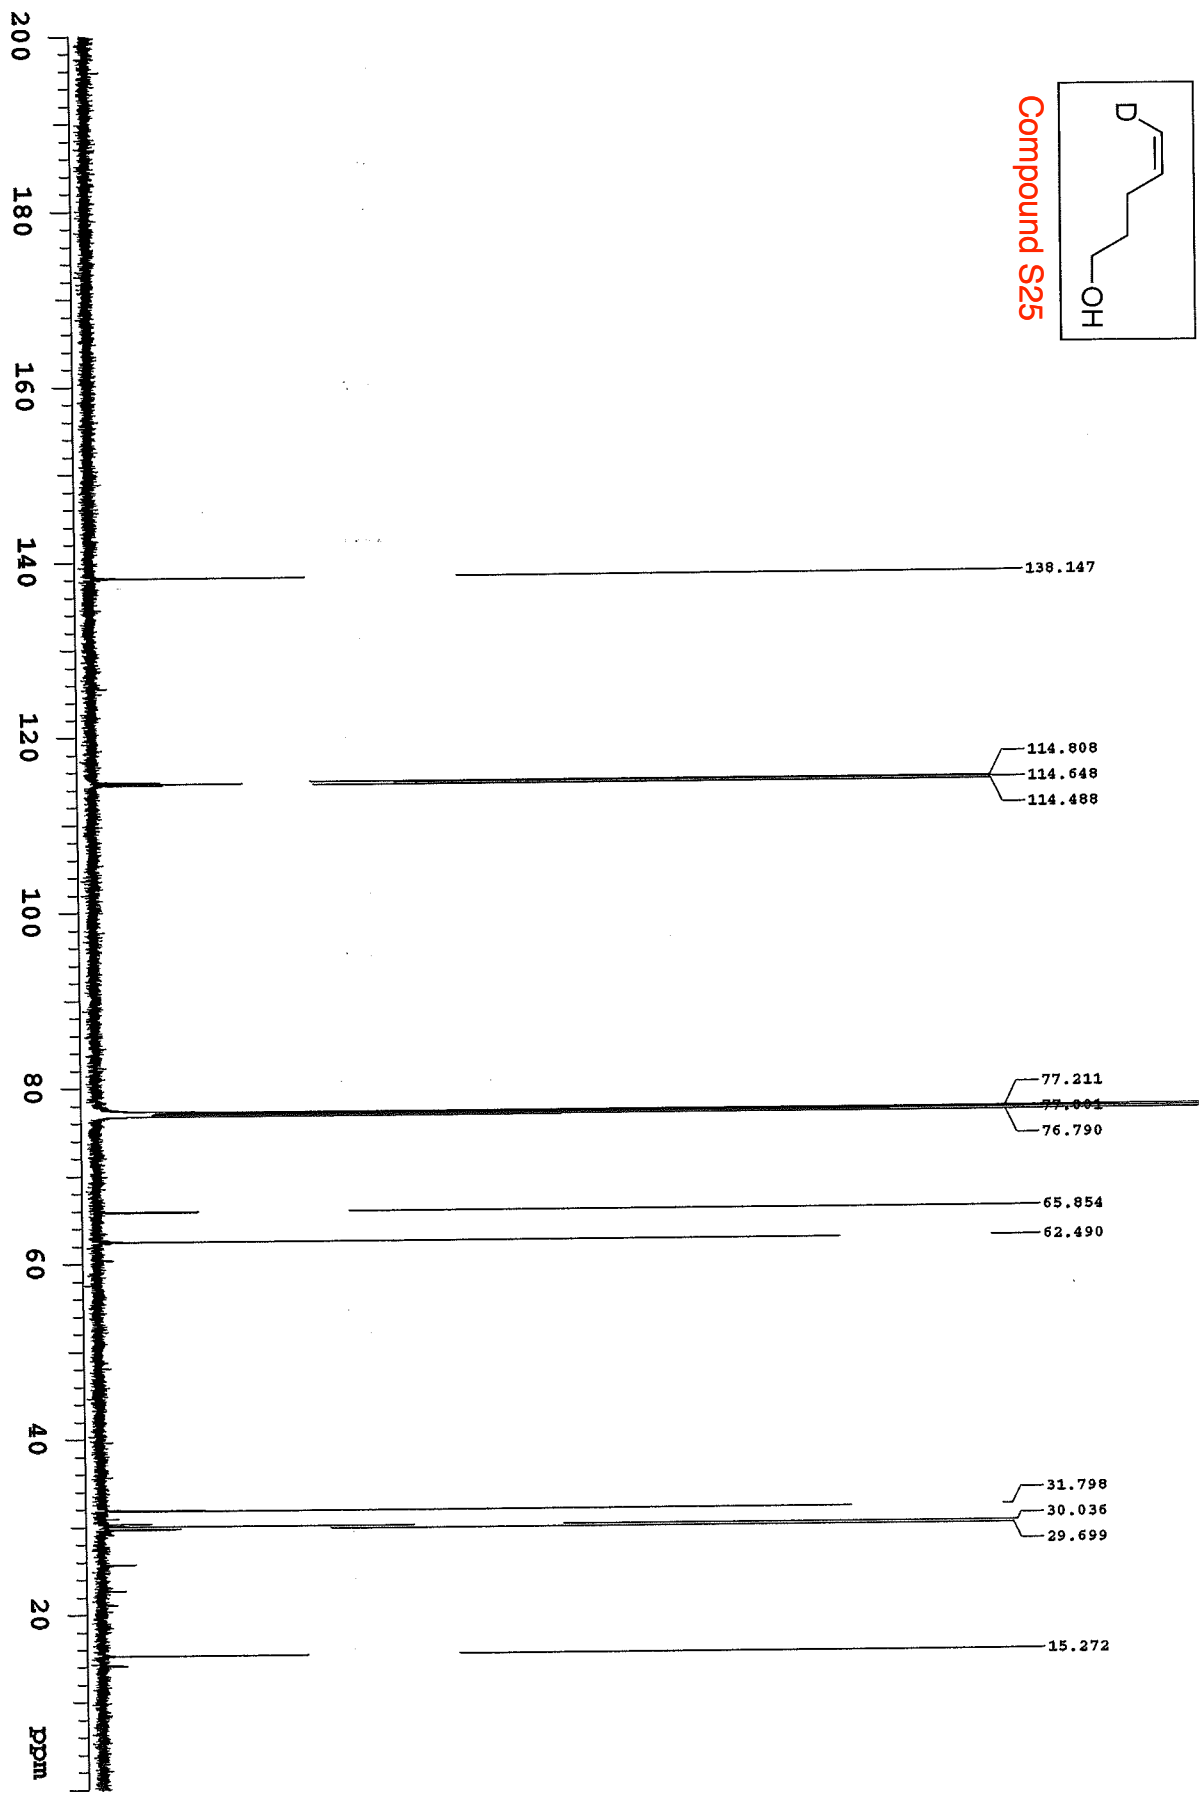

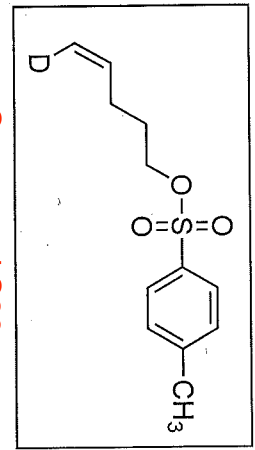

Compound S26

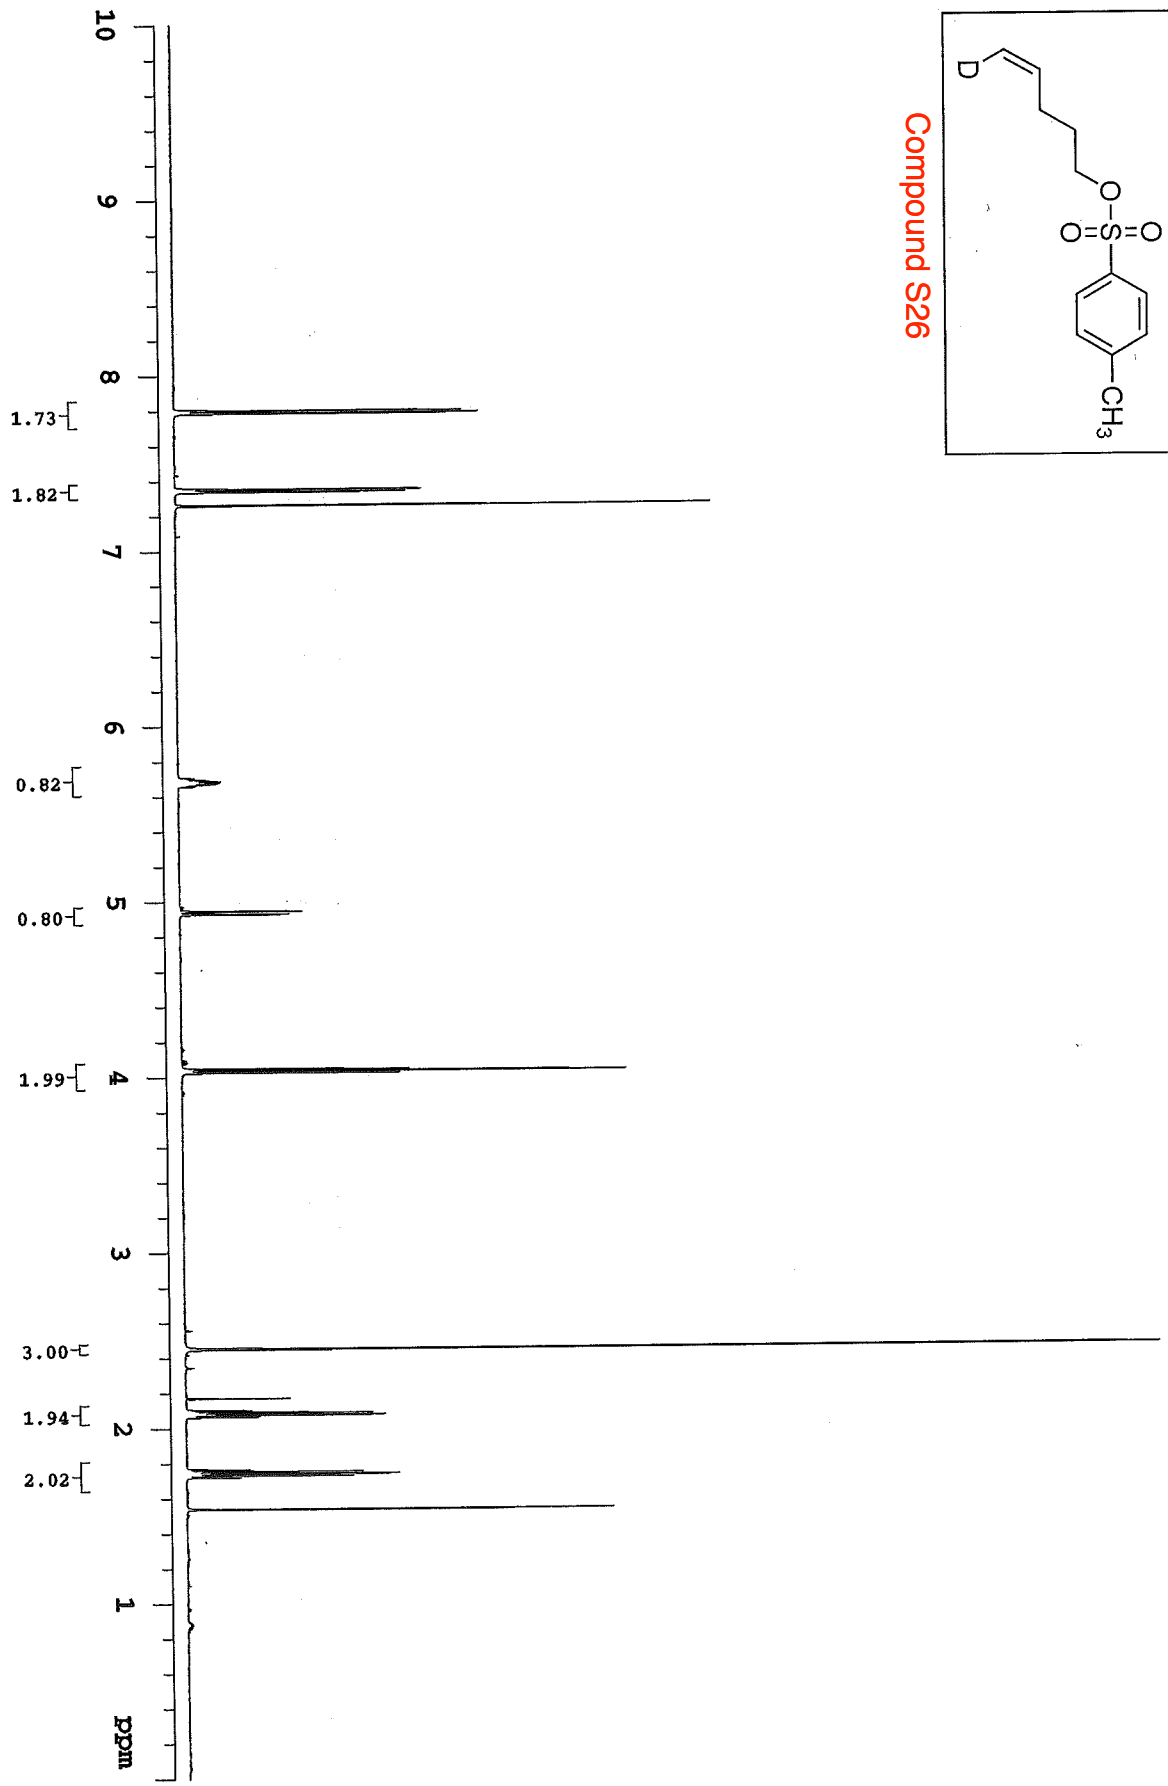

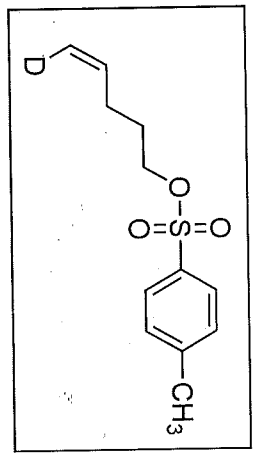

Compound S26

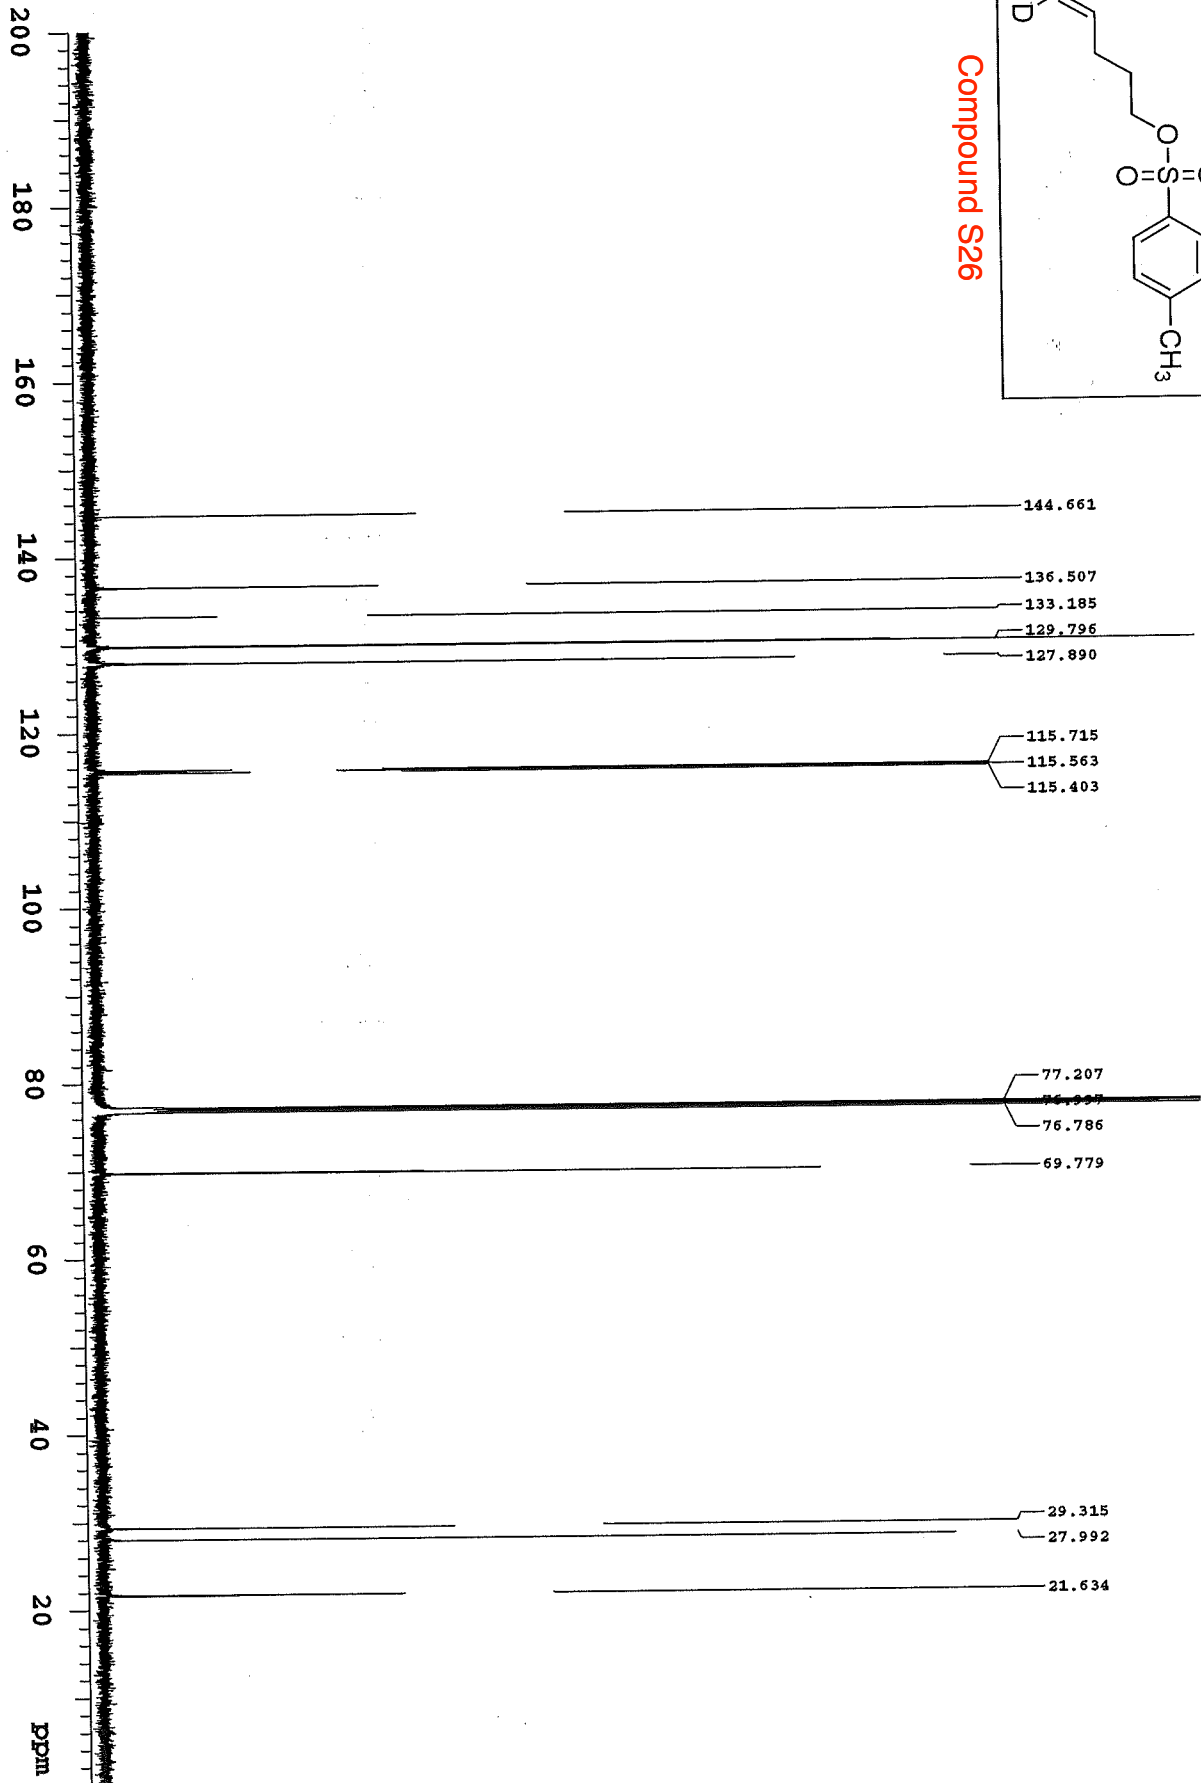

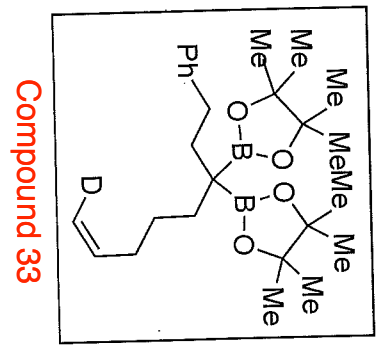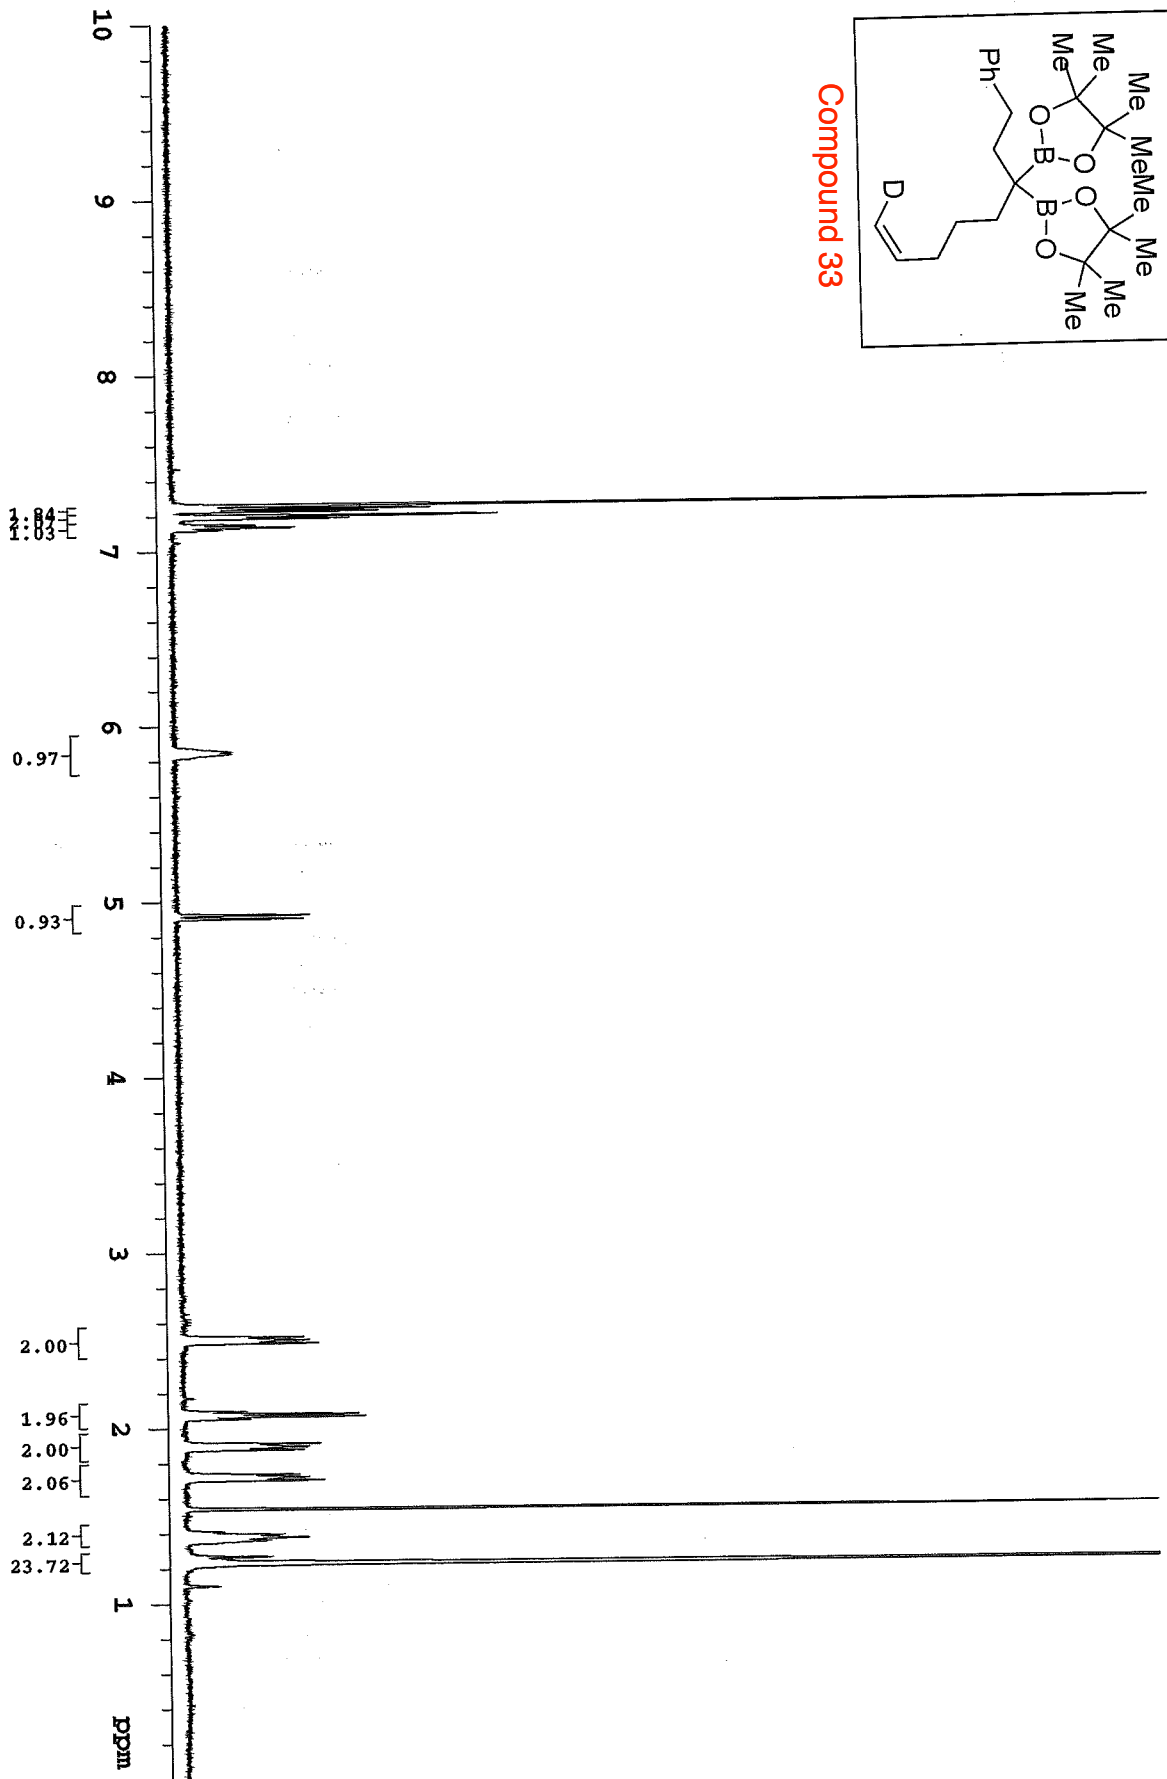

Compound 33

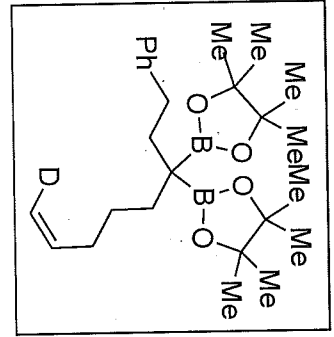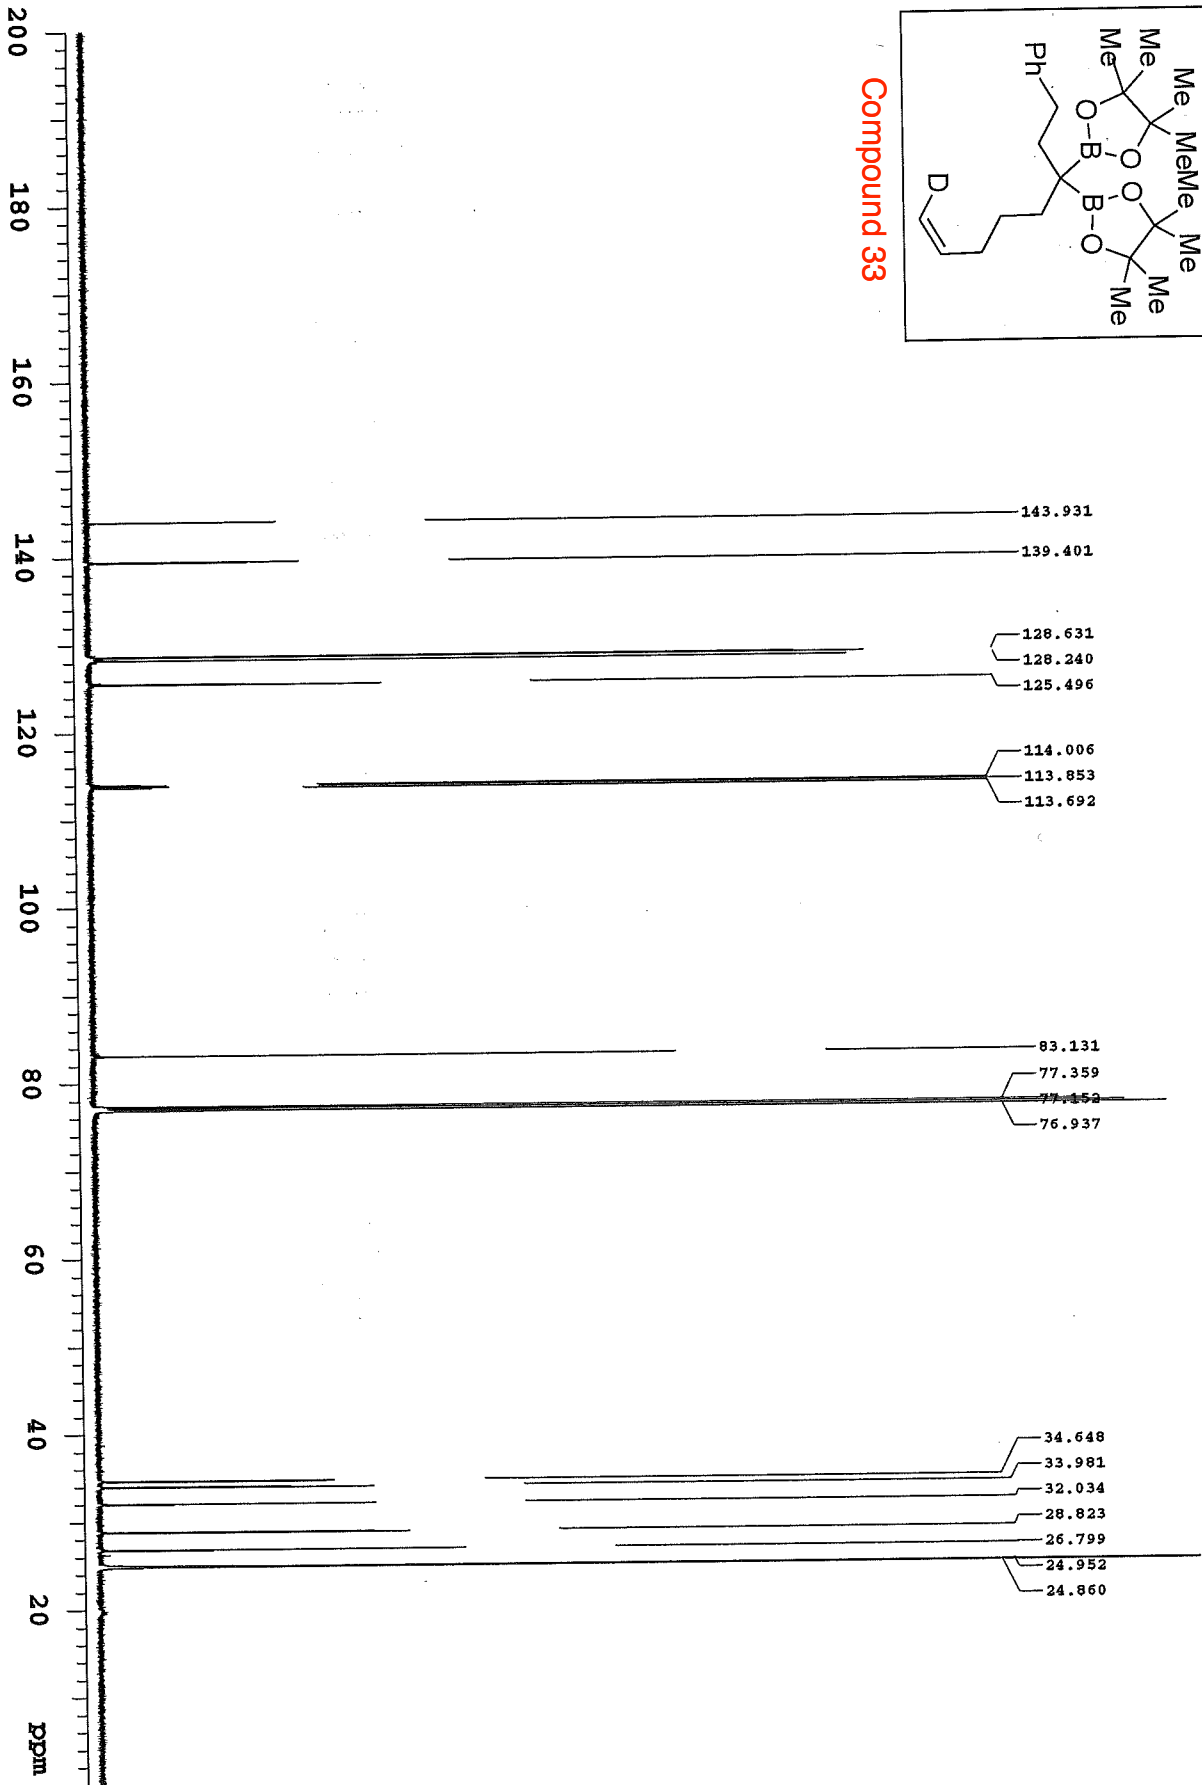

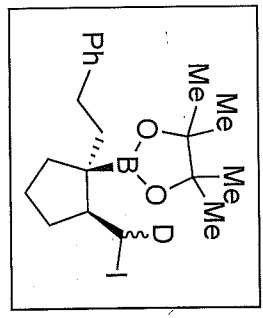

Compound 34

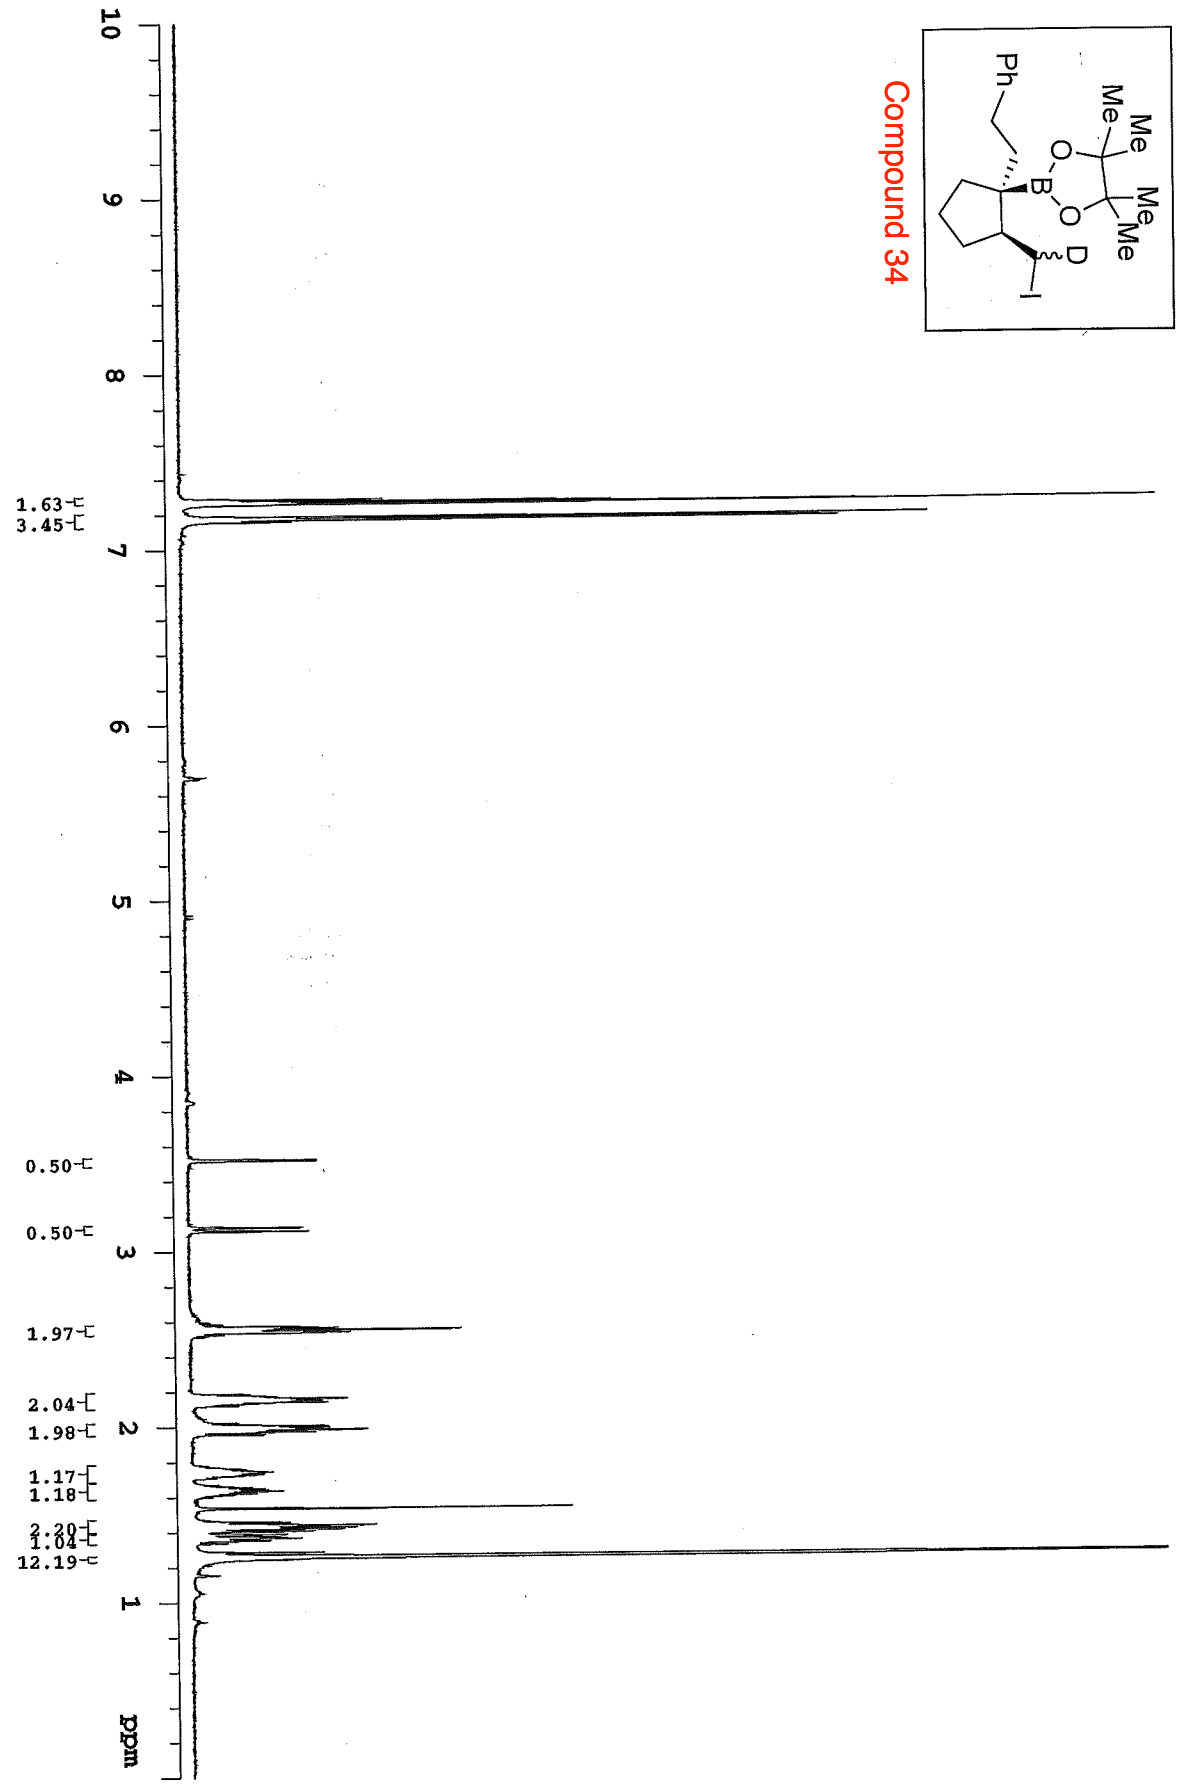

Compound 34

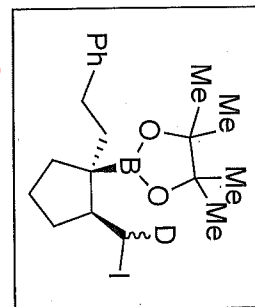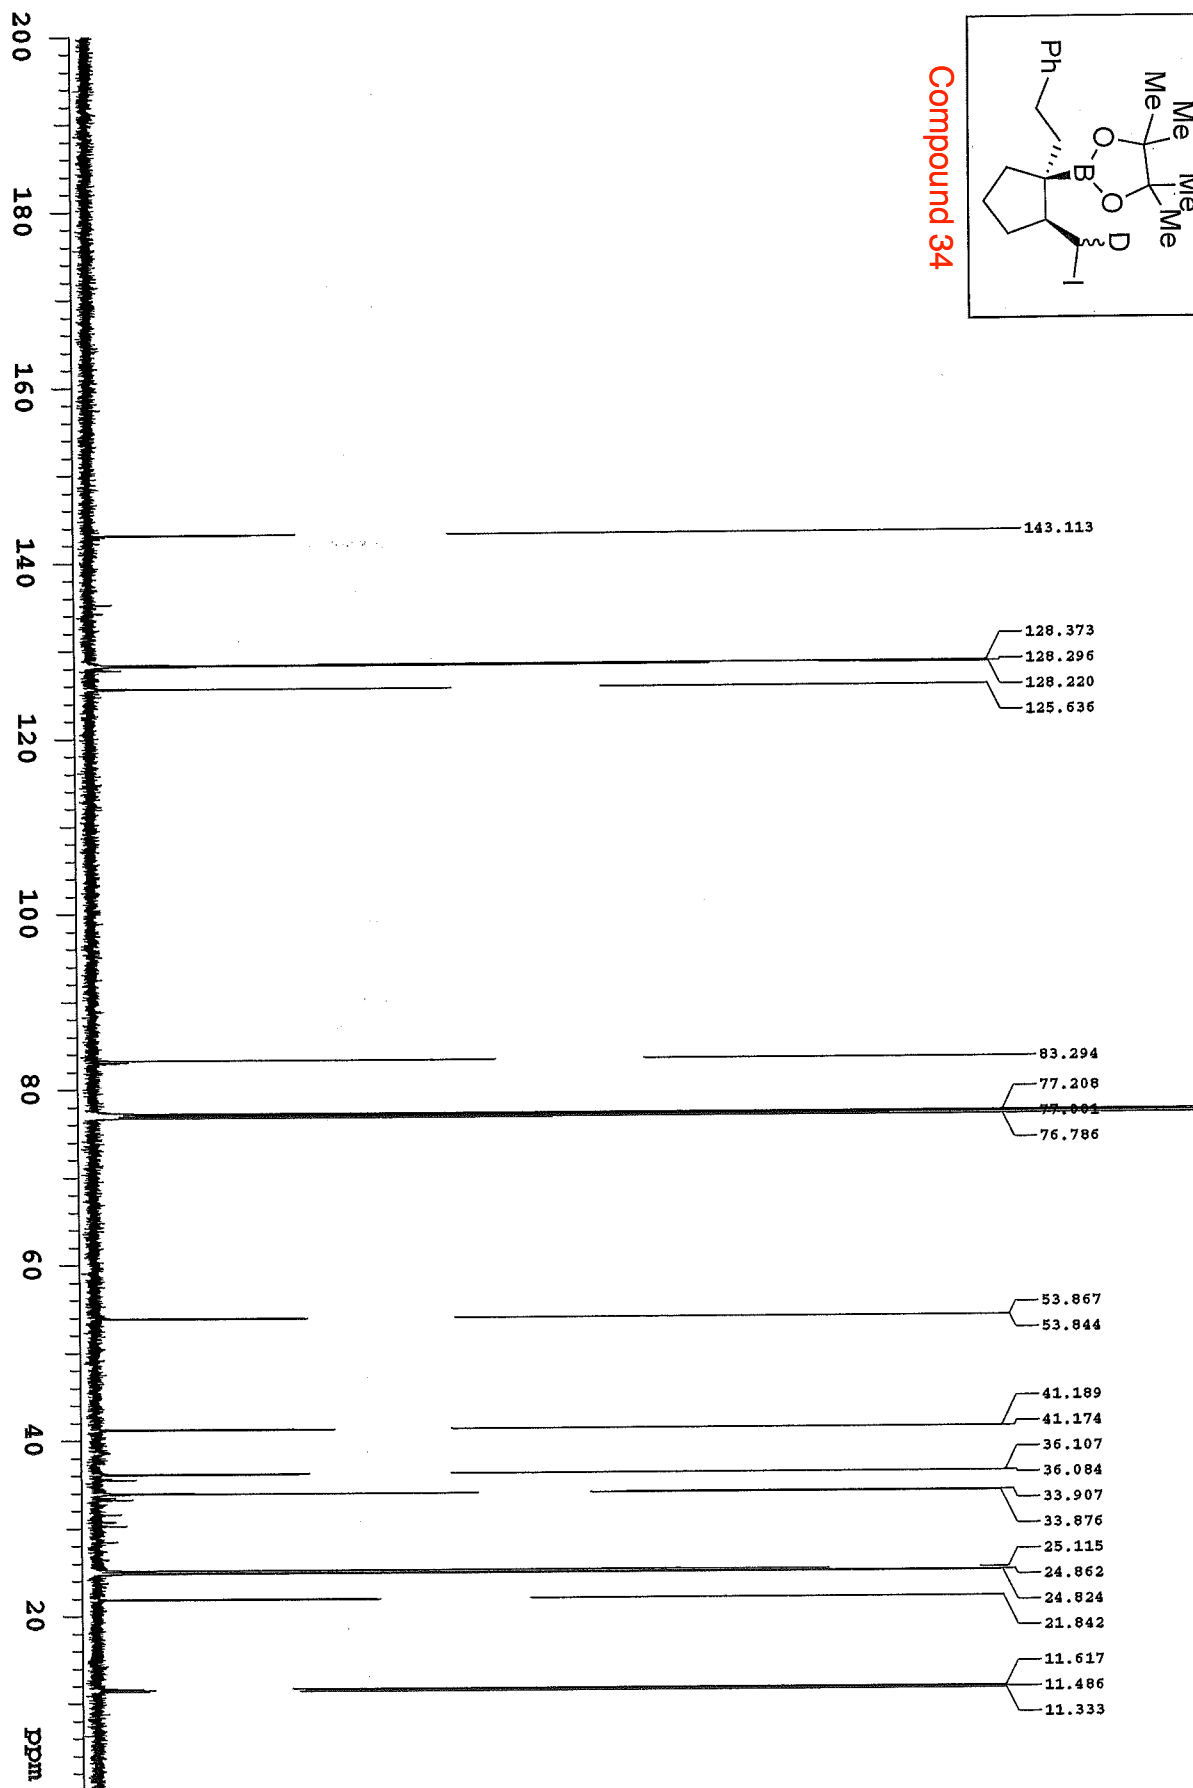



Compound 24  
in CDCl<sub>3</sub>

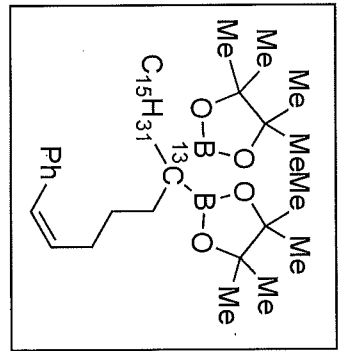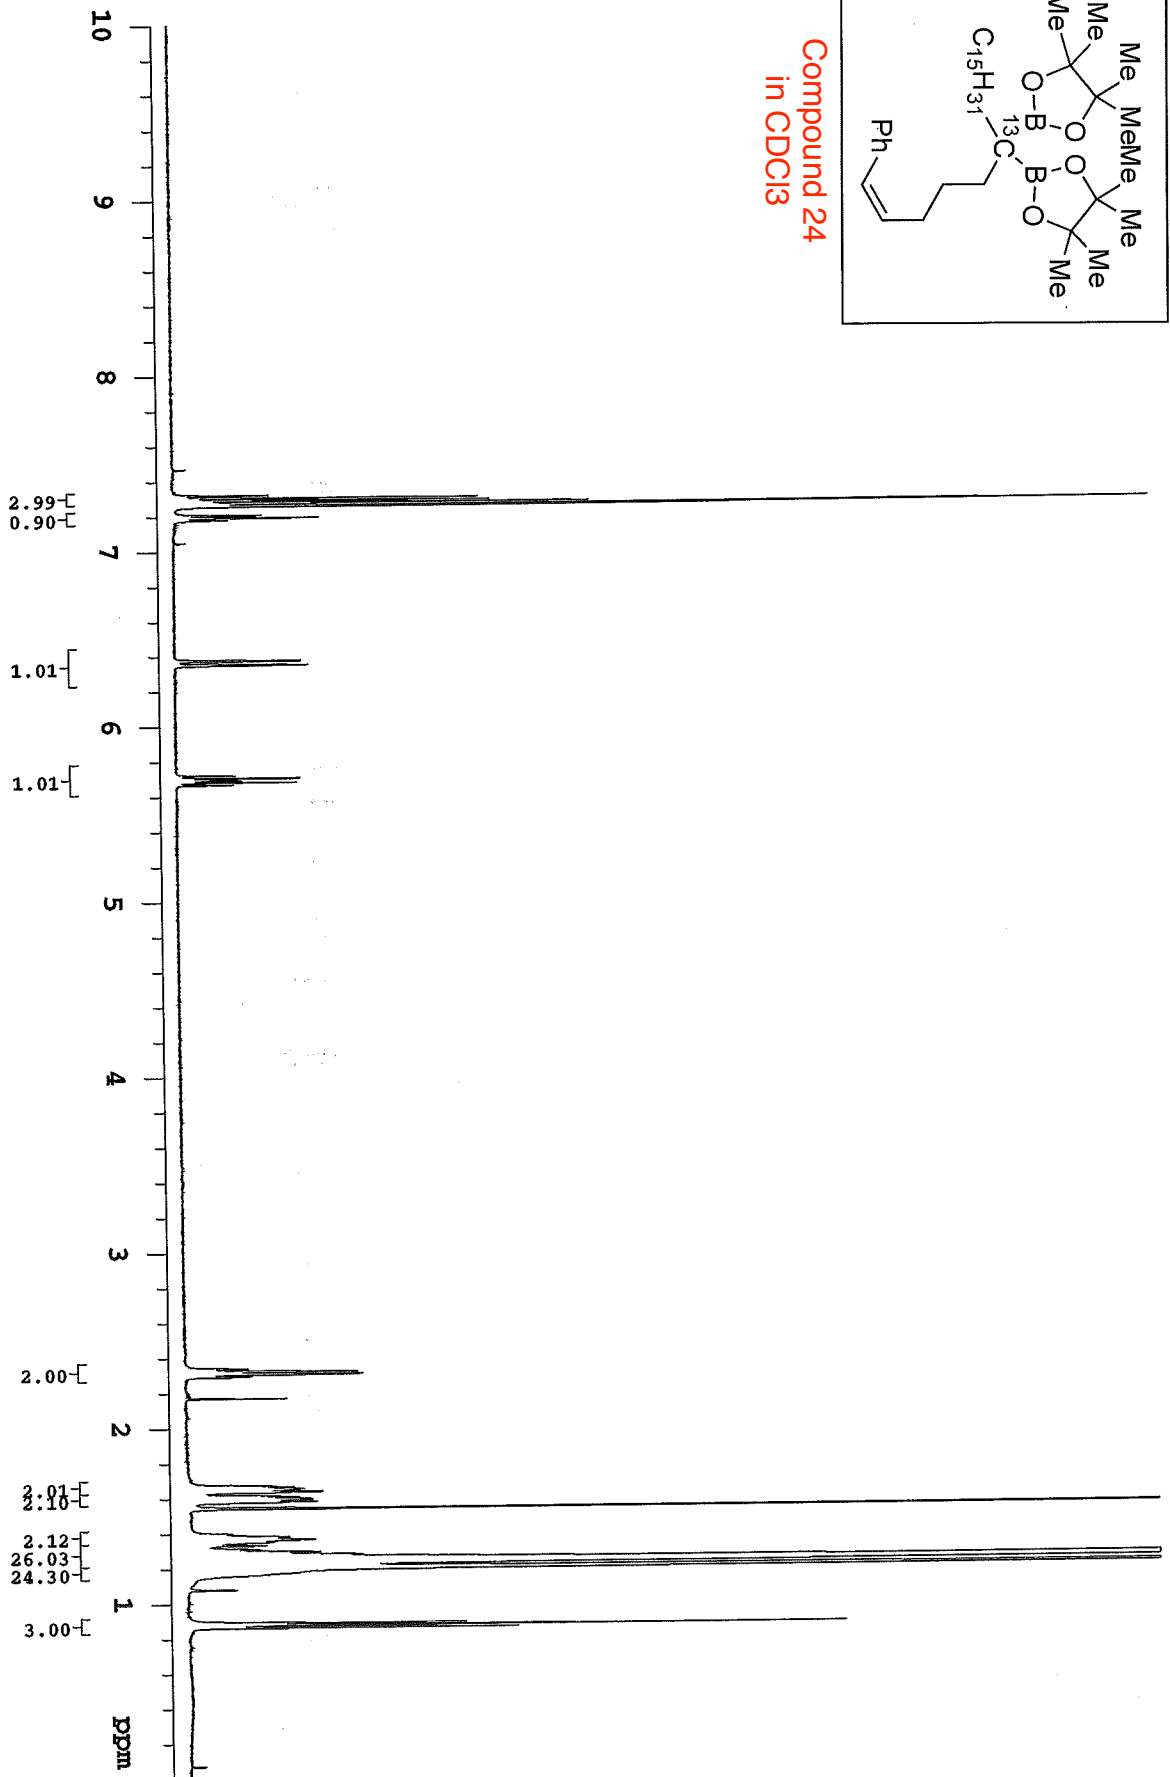

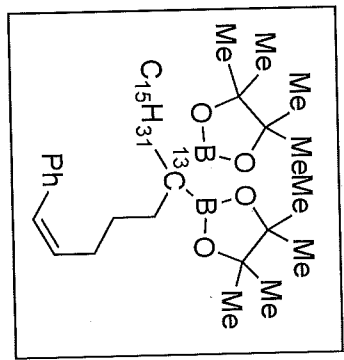

Compound 24  
in  $\text{CDCl}_3$

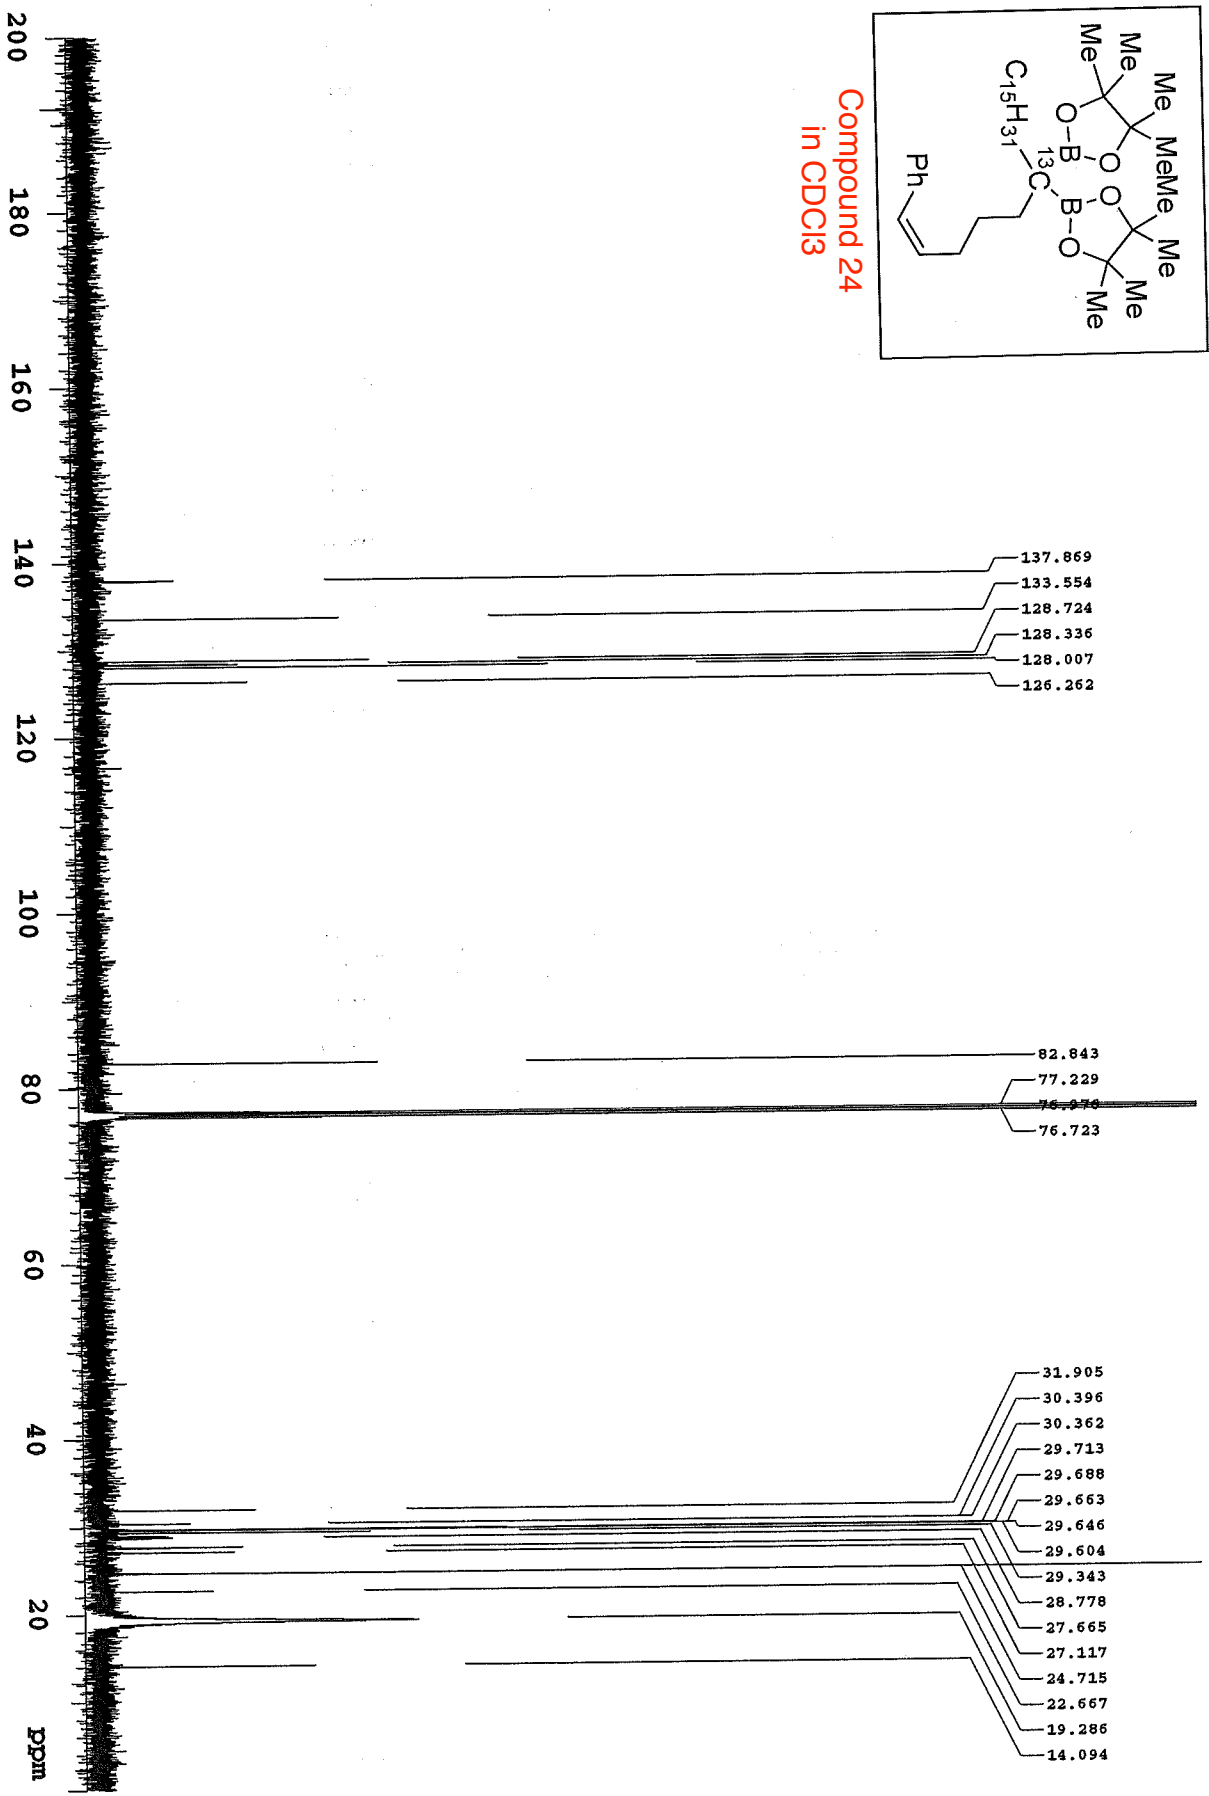

Compound 24  
in THF-d8

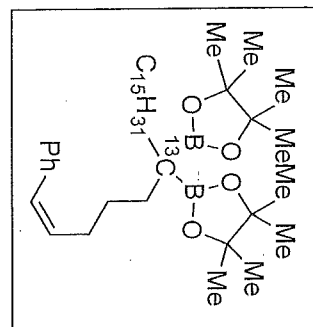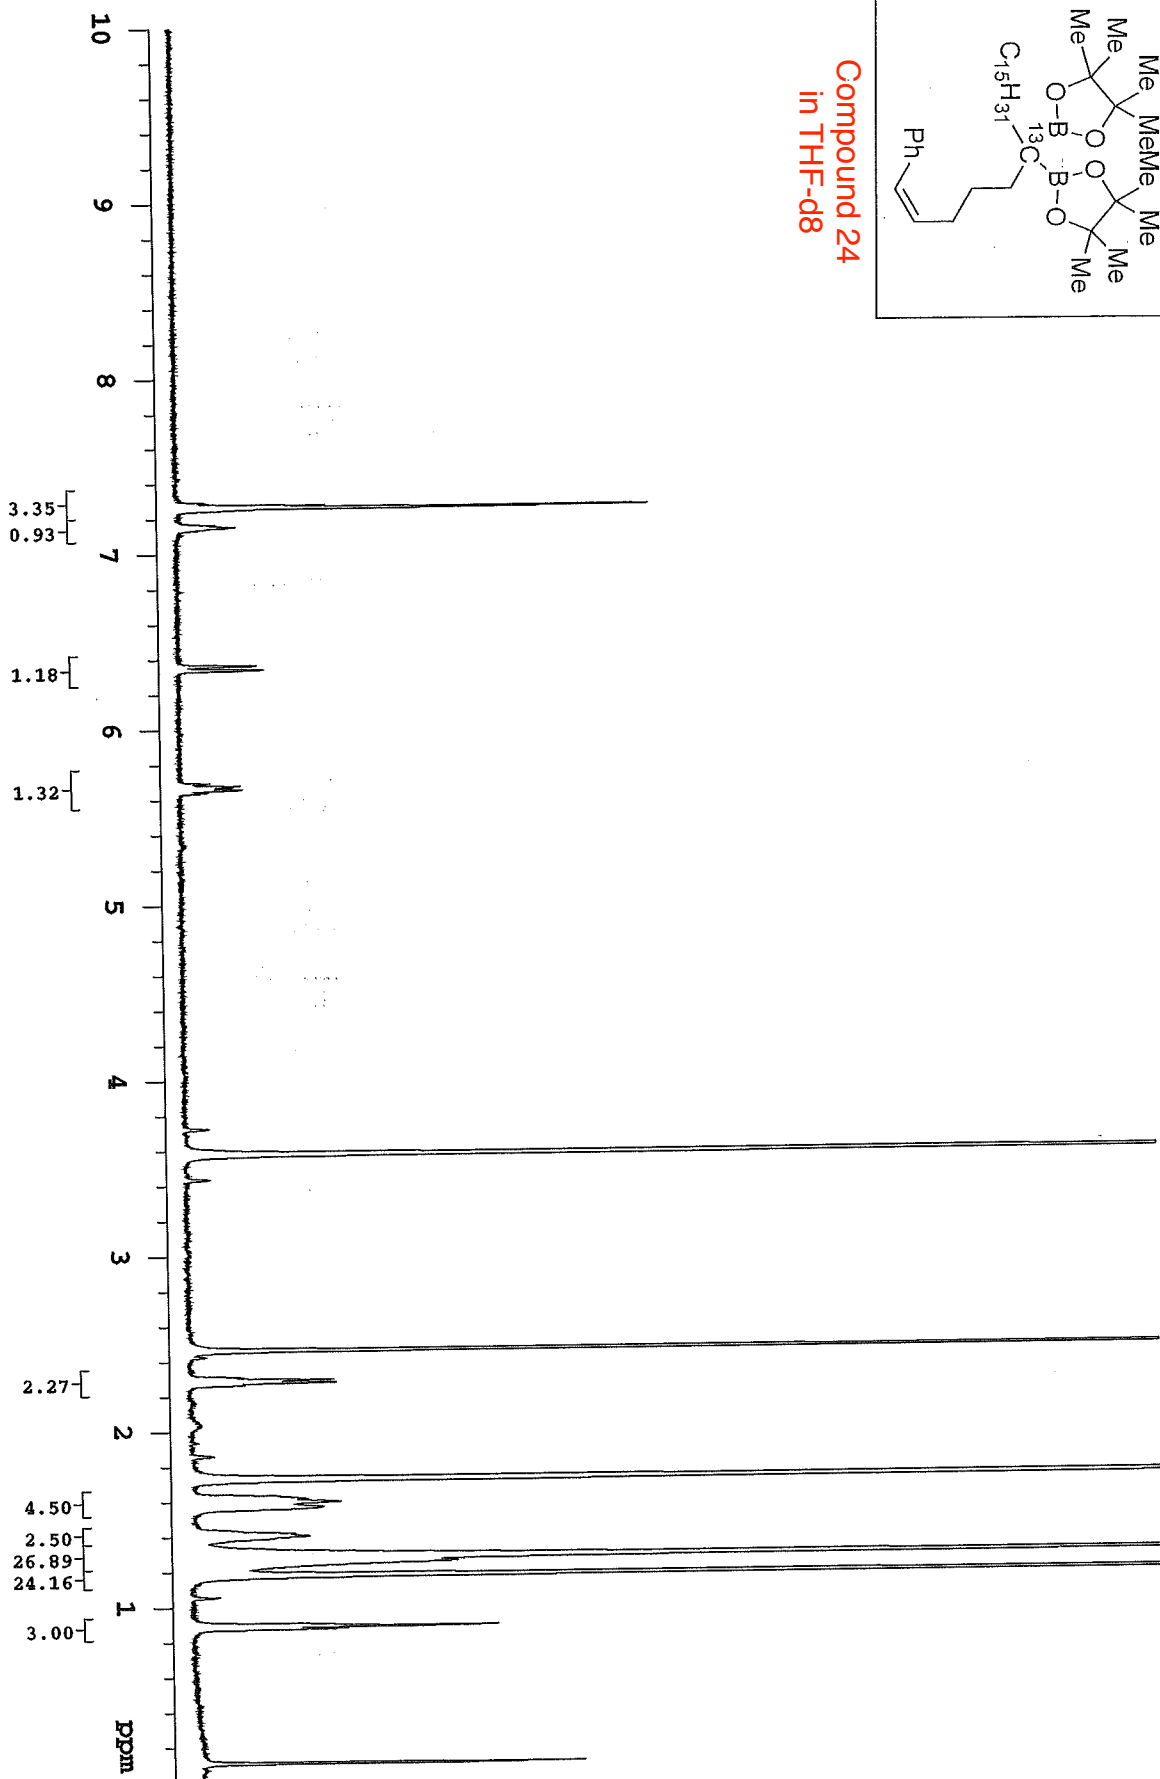

Compound 24  
in THF-d8

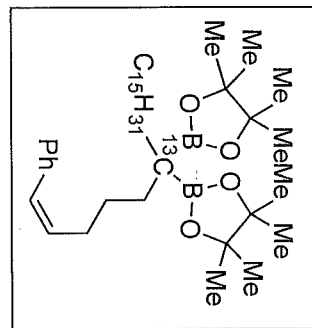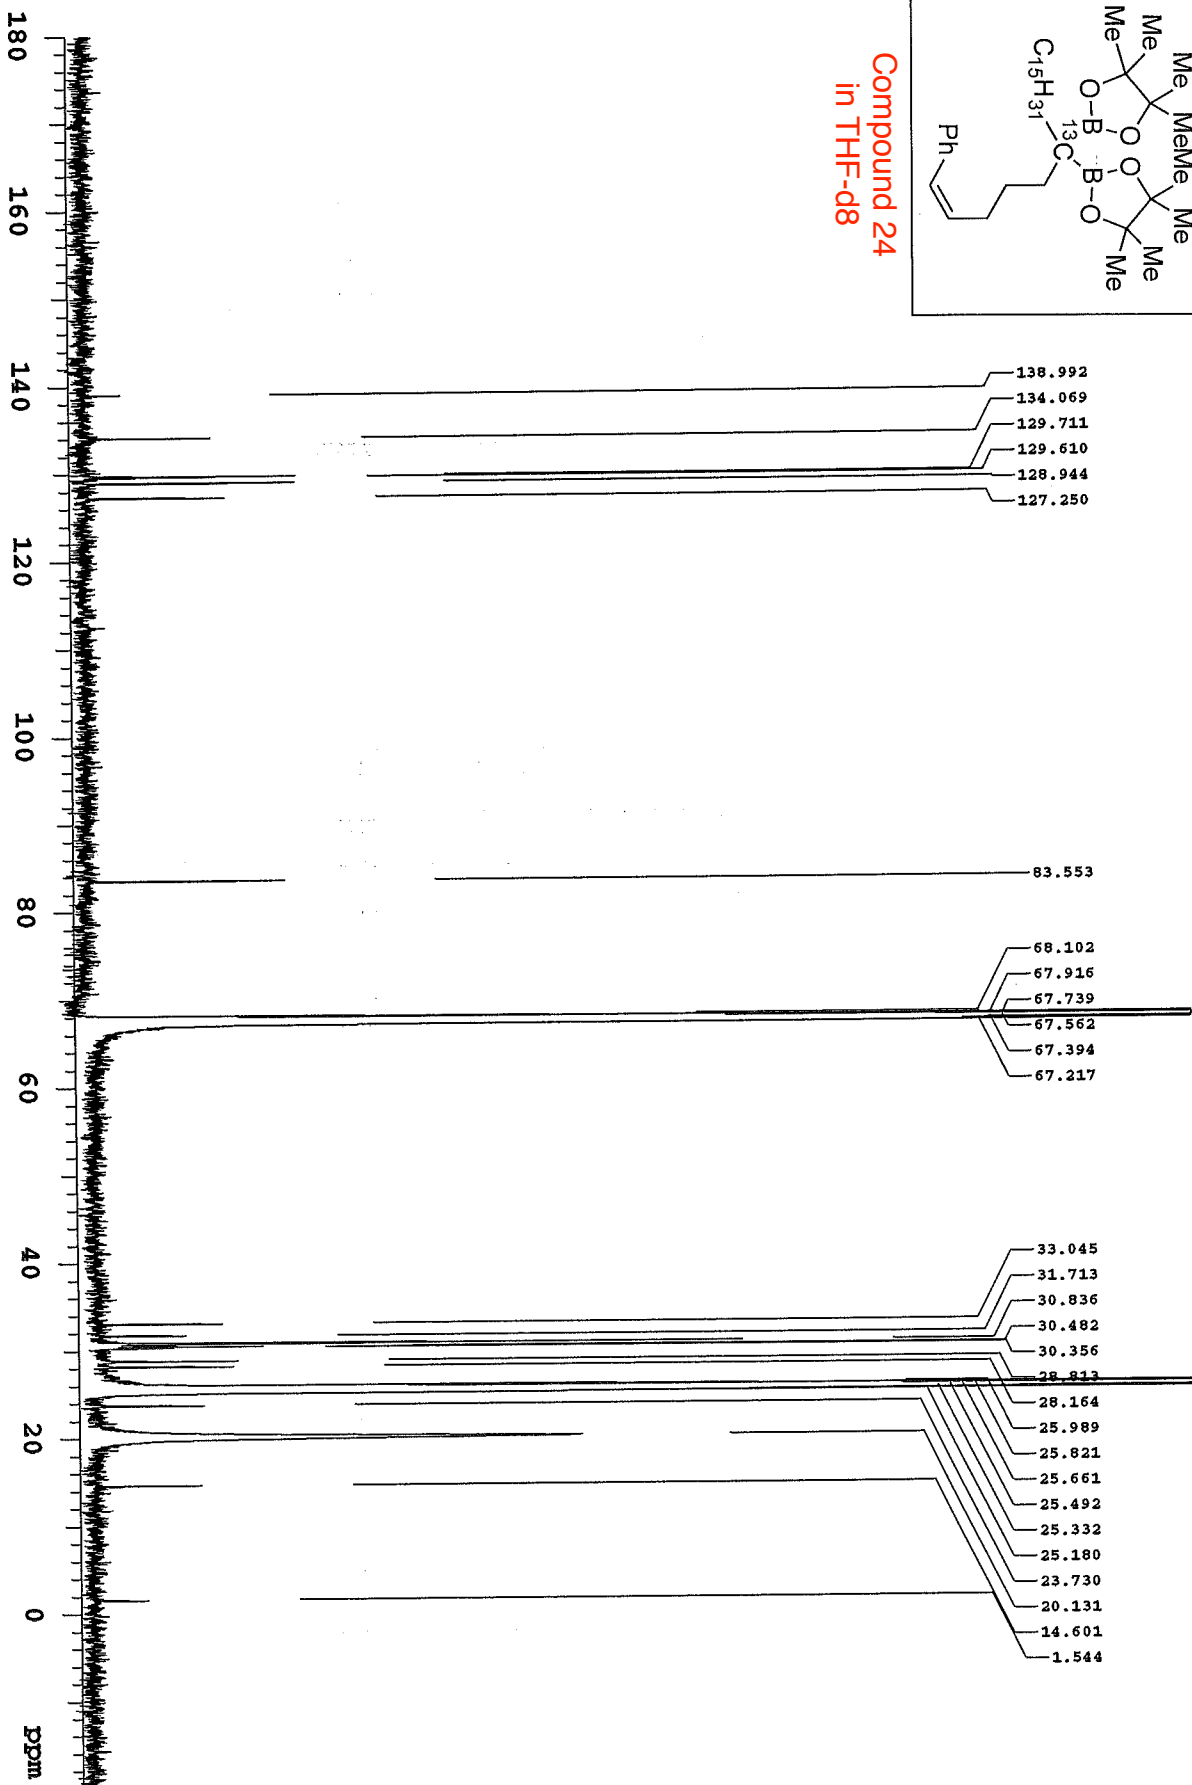

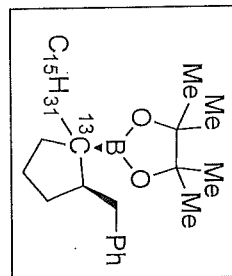

Compound S28  
in CDCl<sub>3</sub>

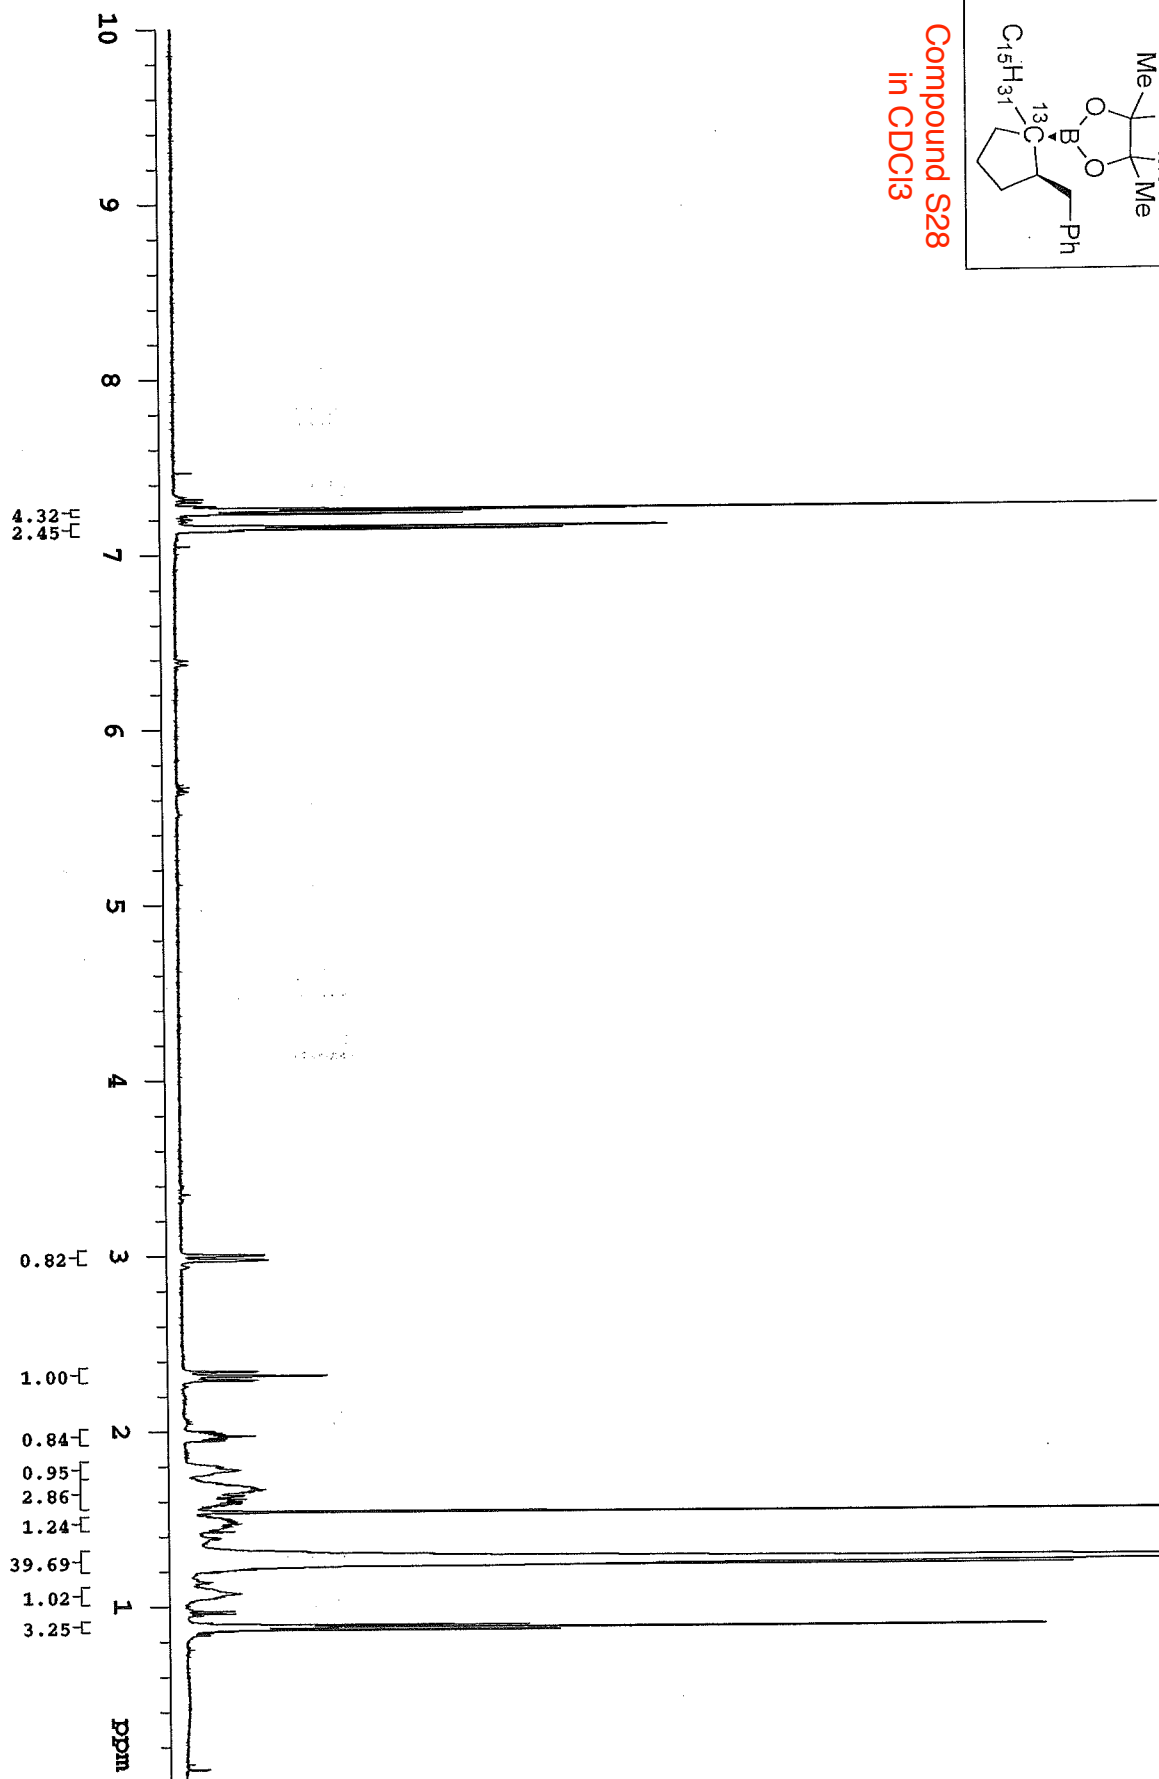

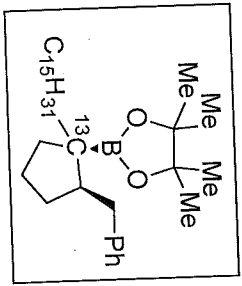

Compound S28  
in CDCl<sub>3</sub>

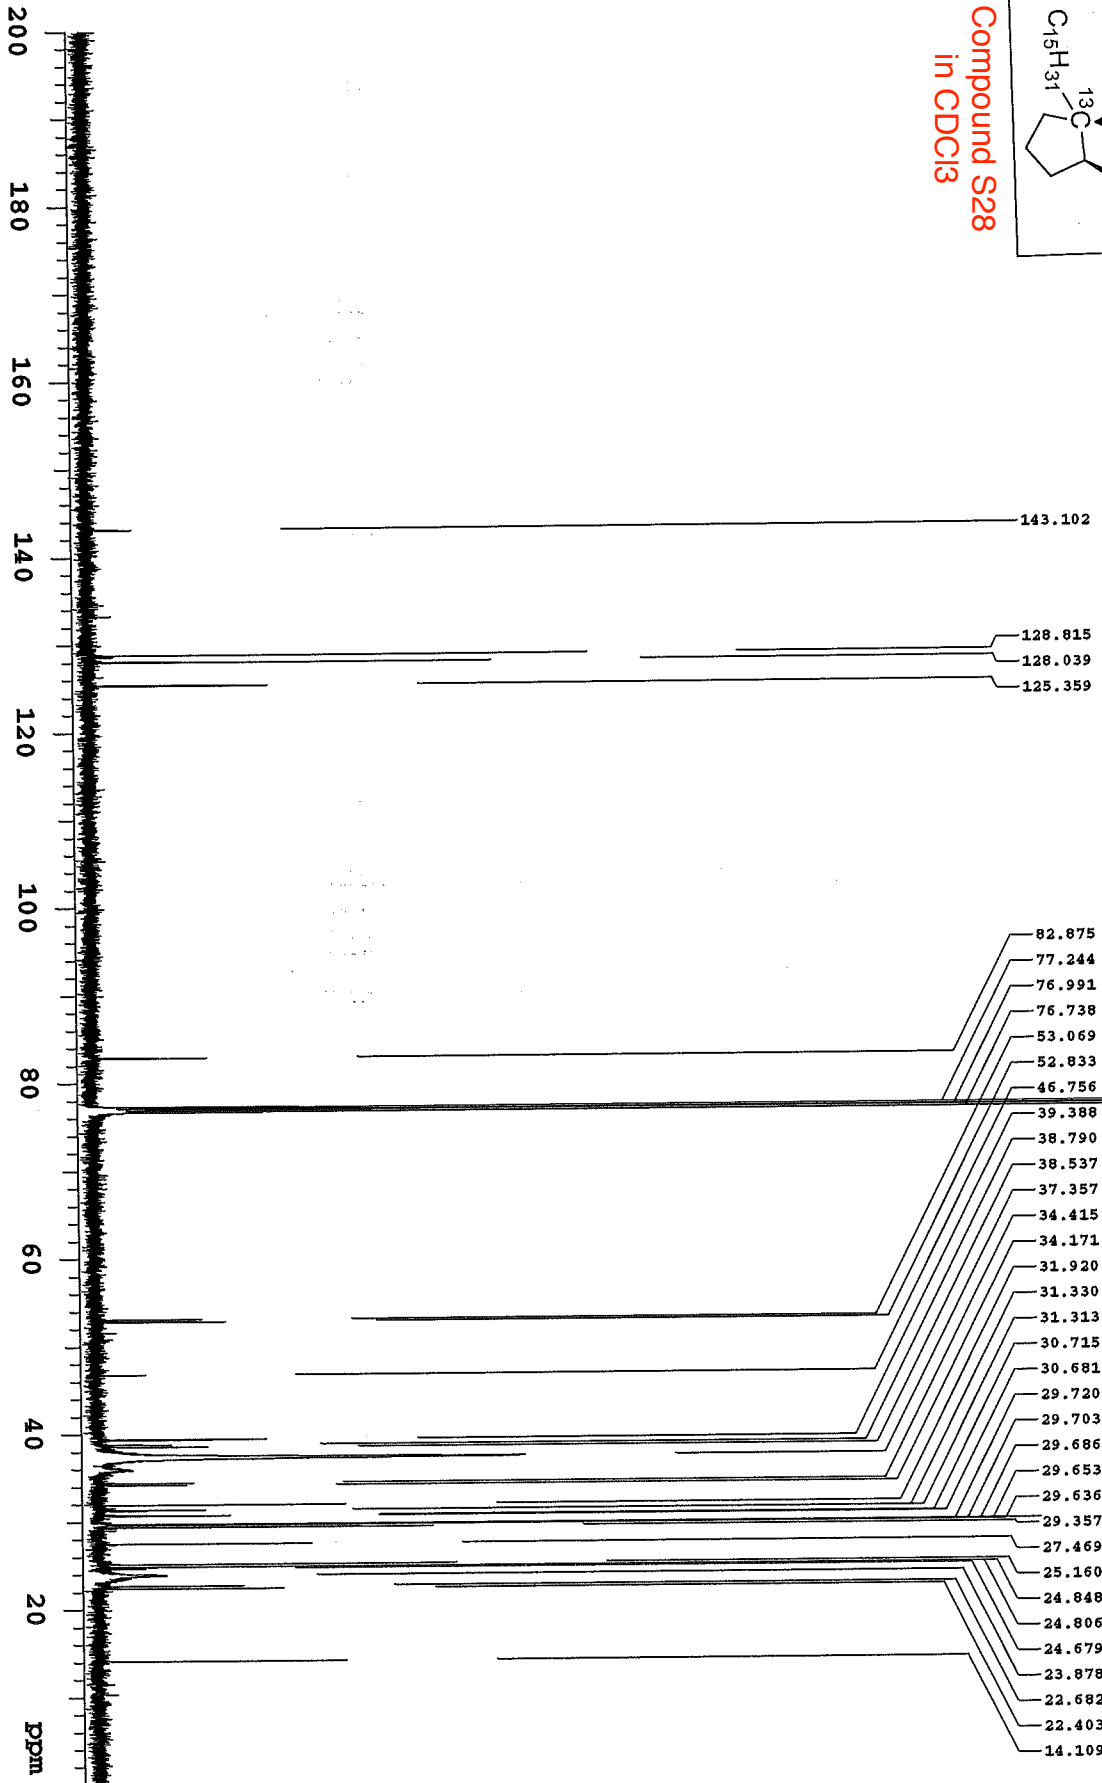

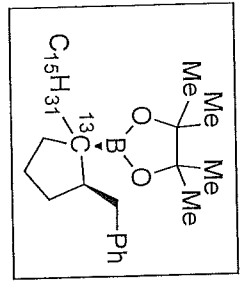

Compound S28  
in THF-d8

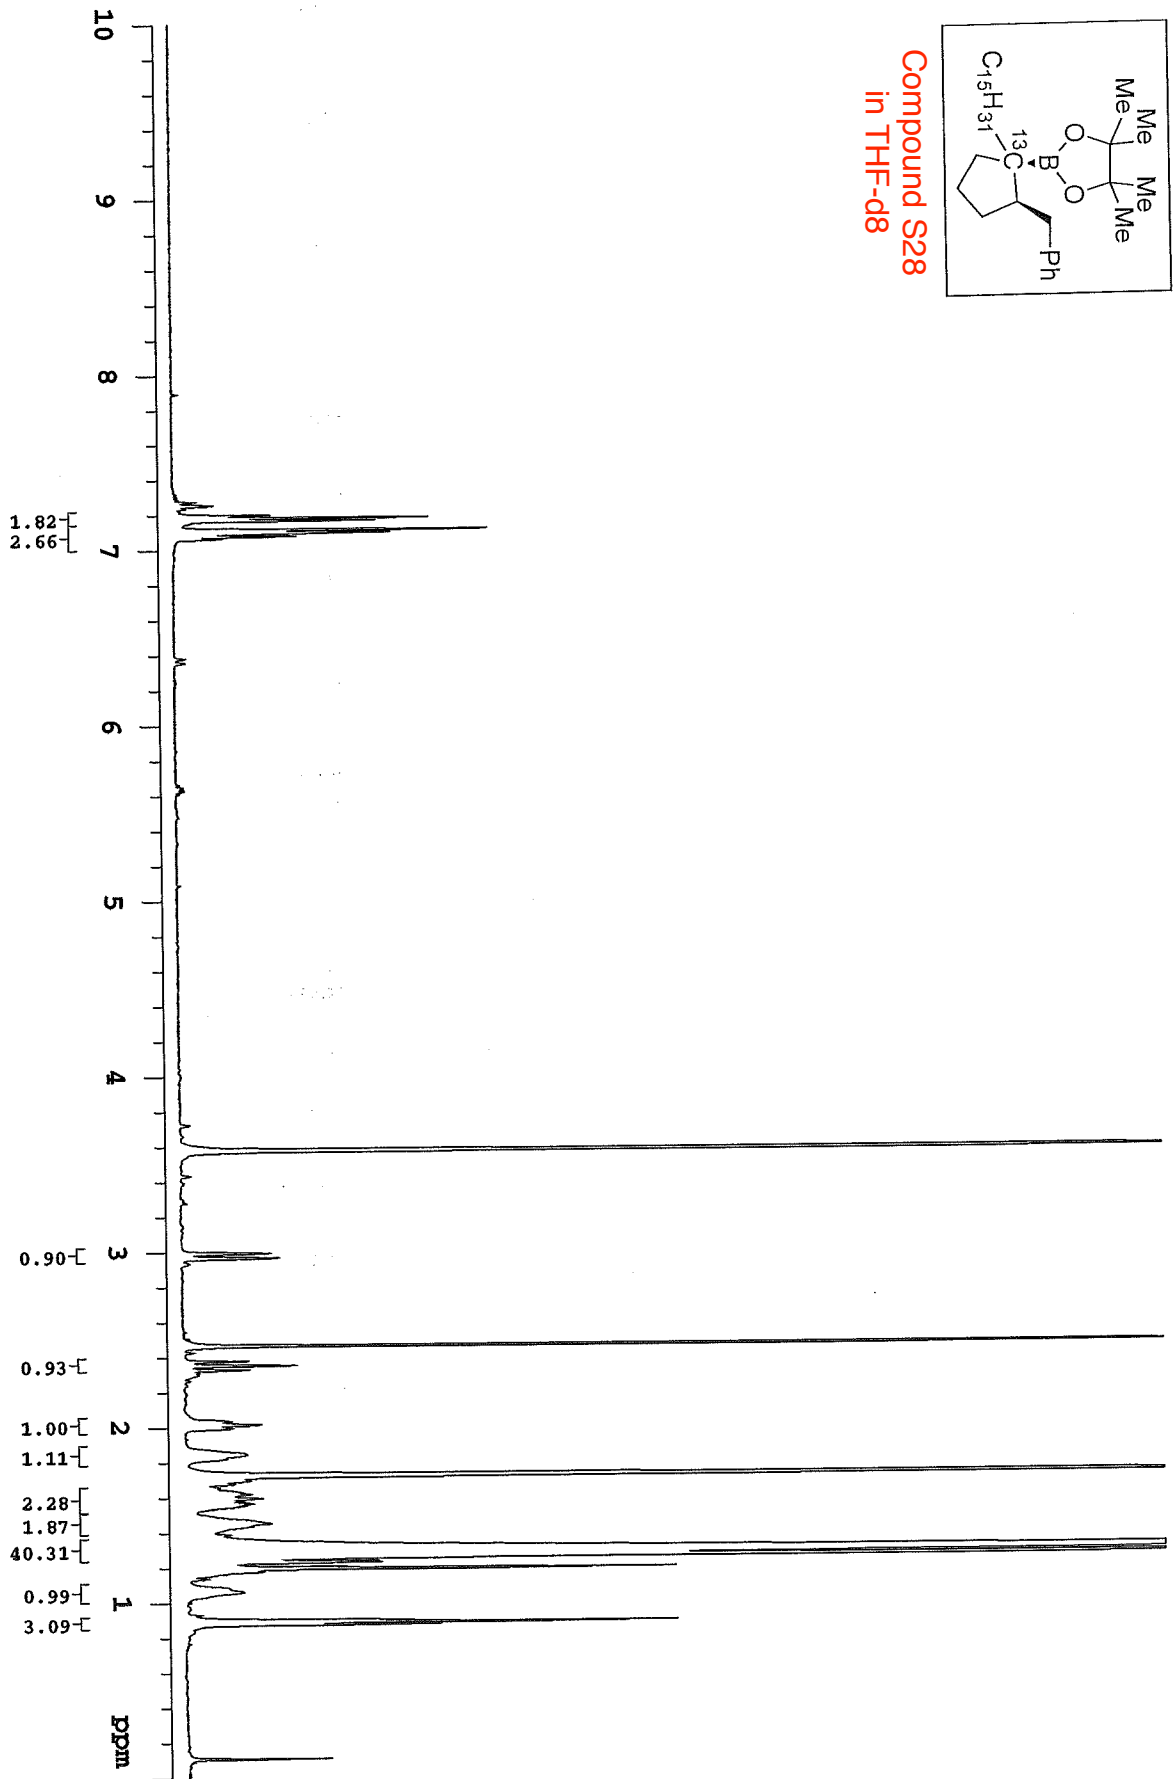

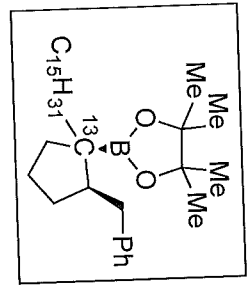

Compound S28  
in THF-d8

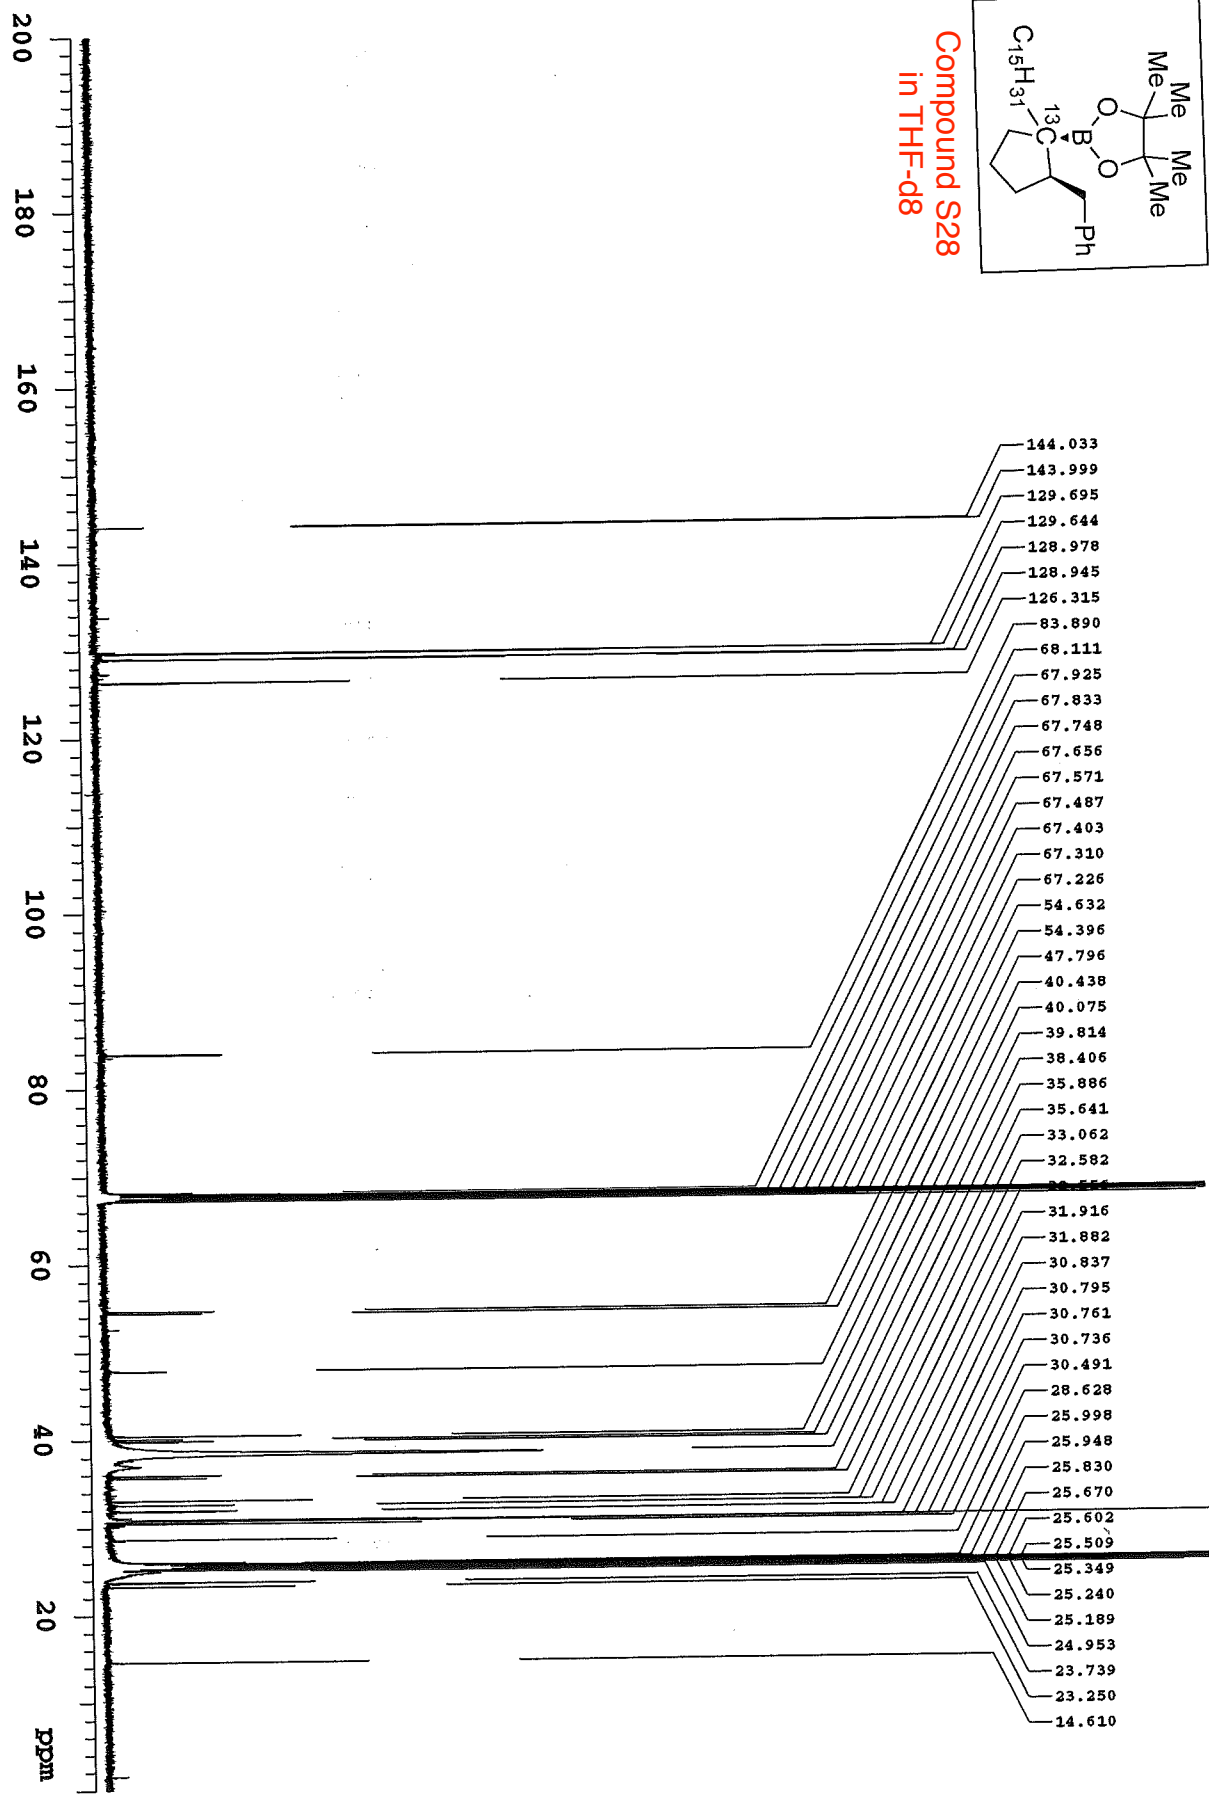



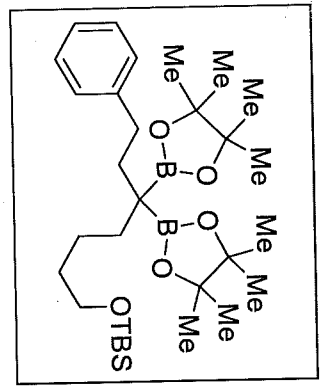

Compound S29

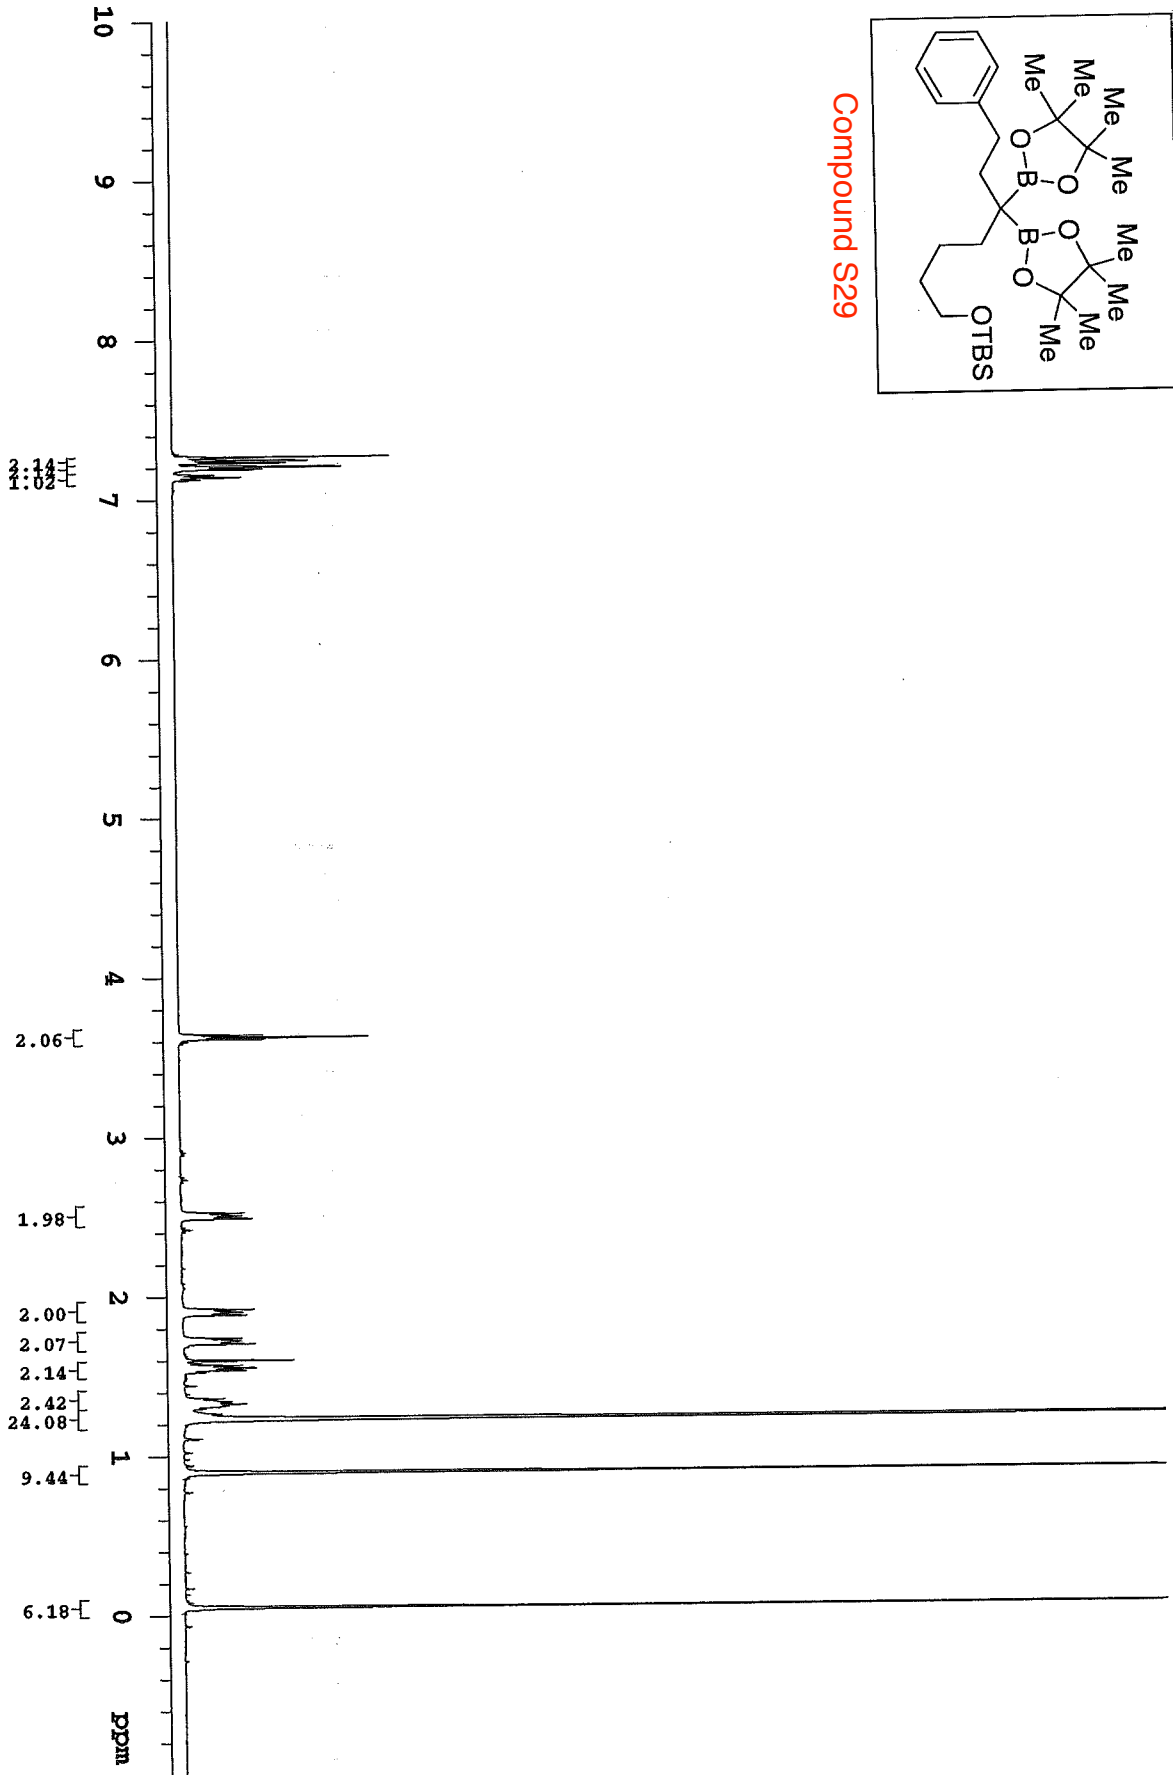

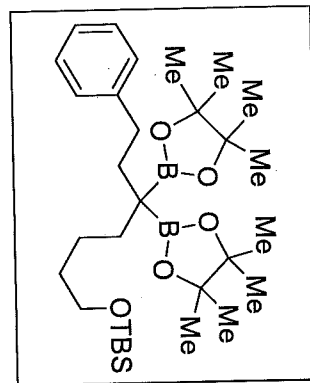

Compound S29

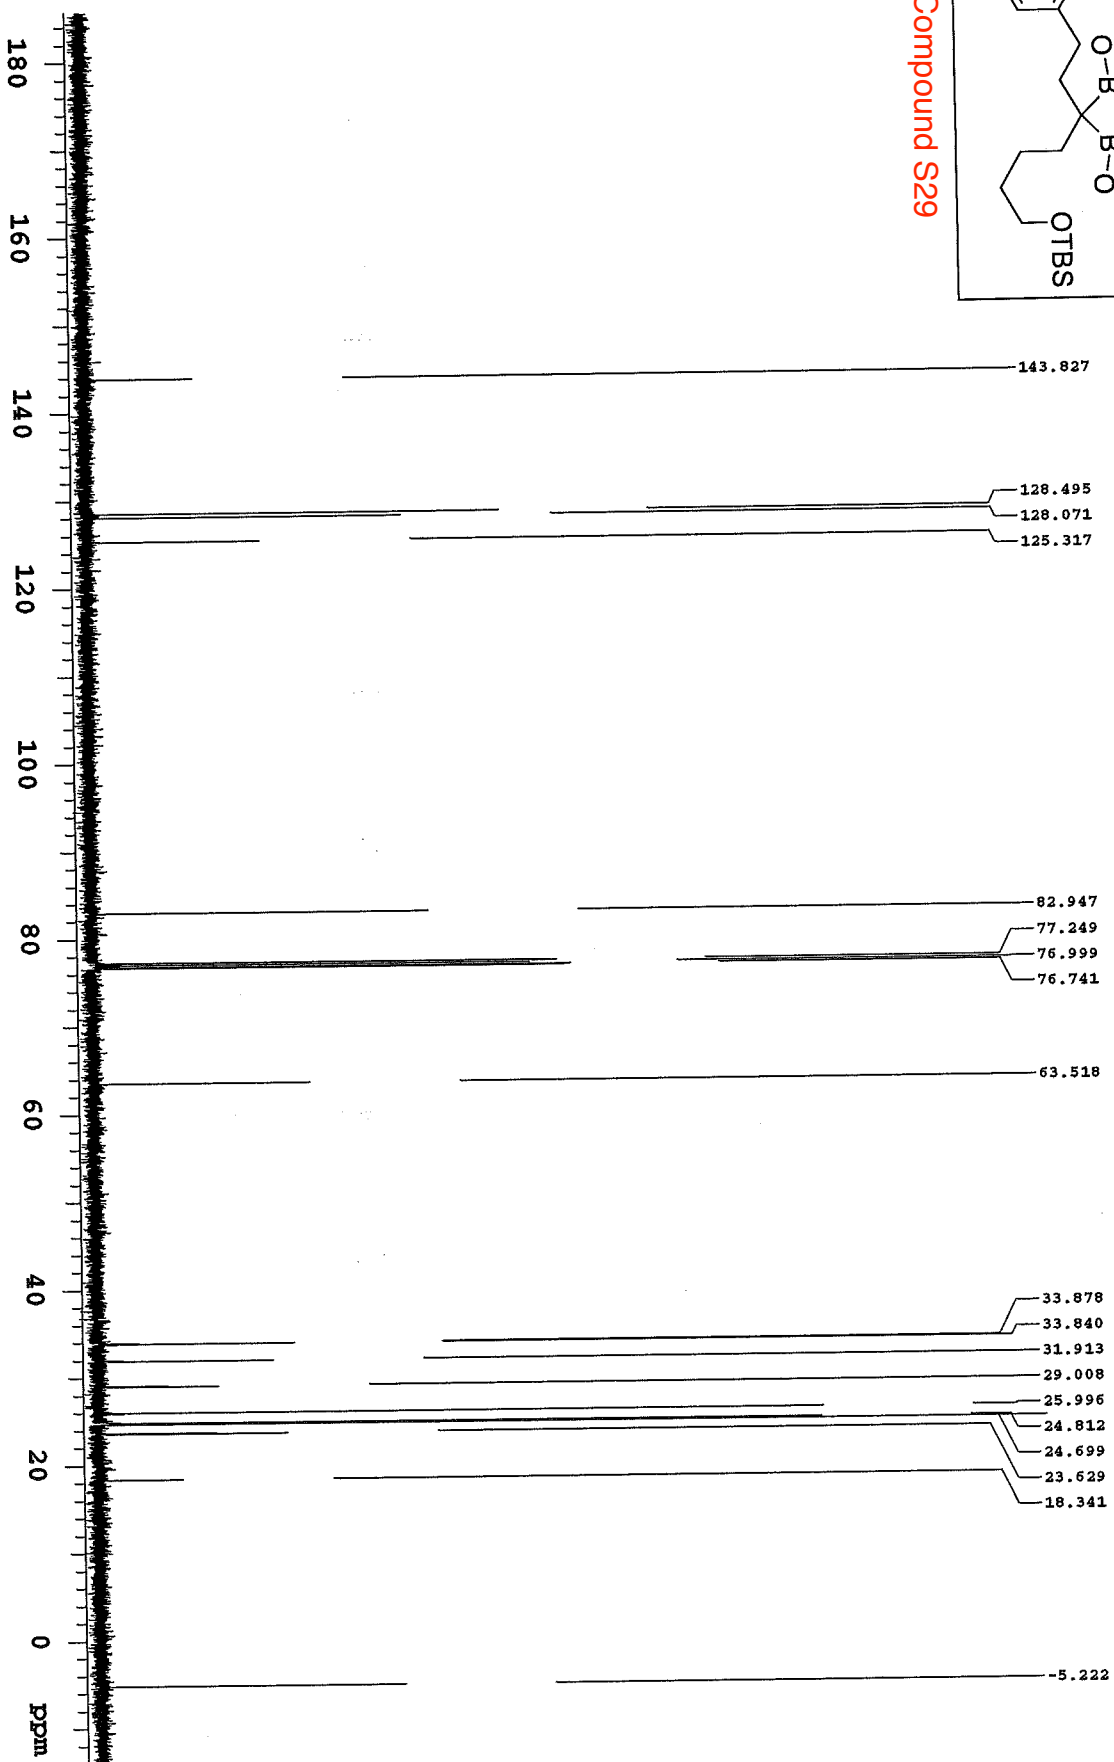

Compound S30

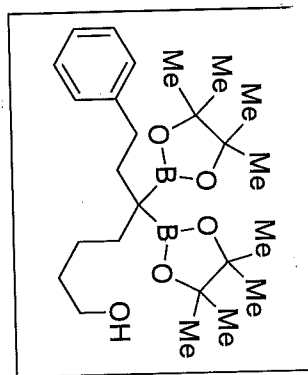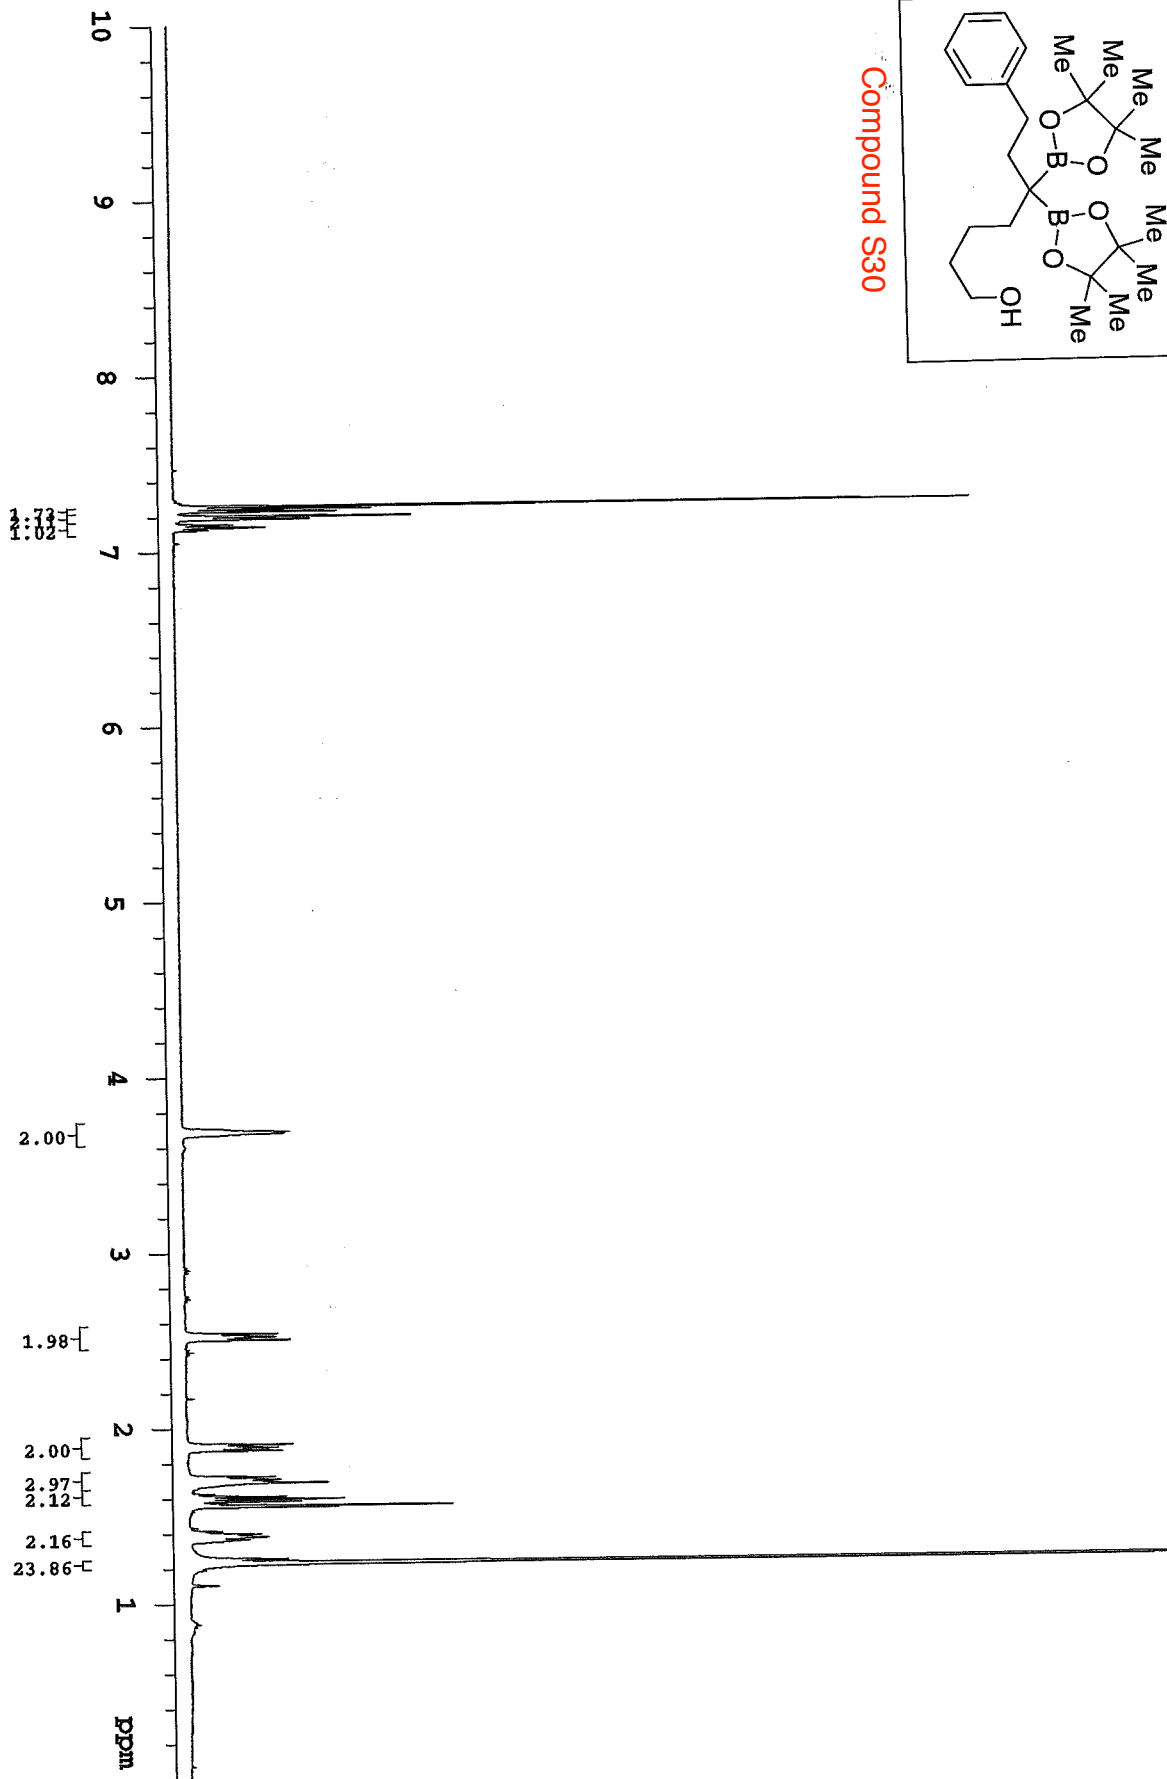

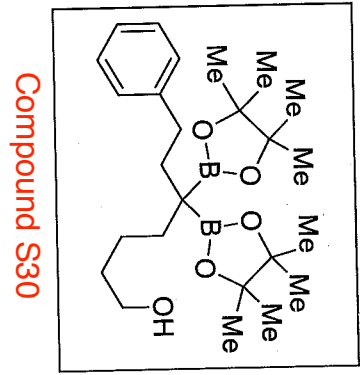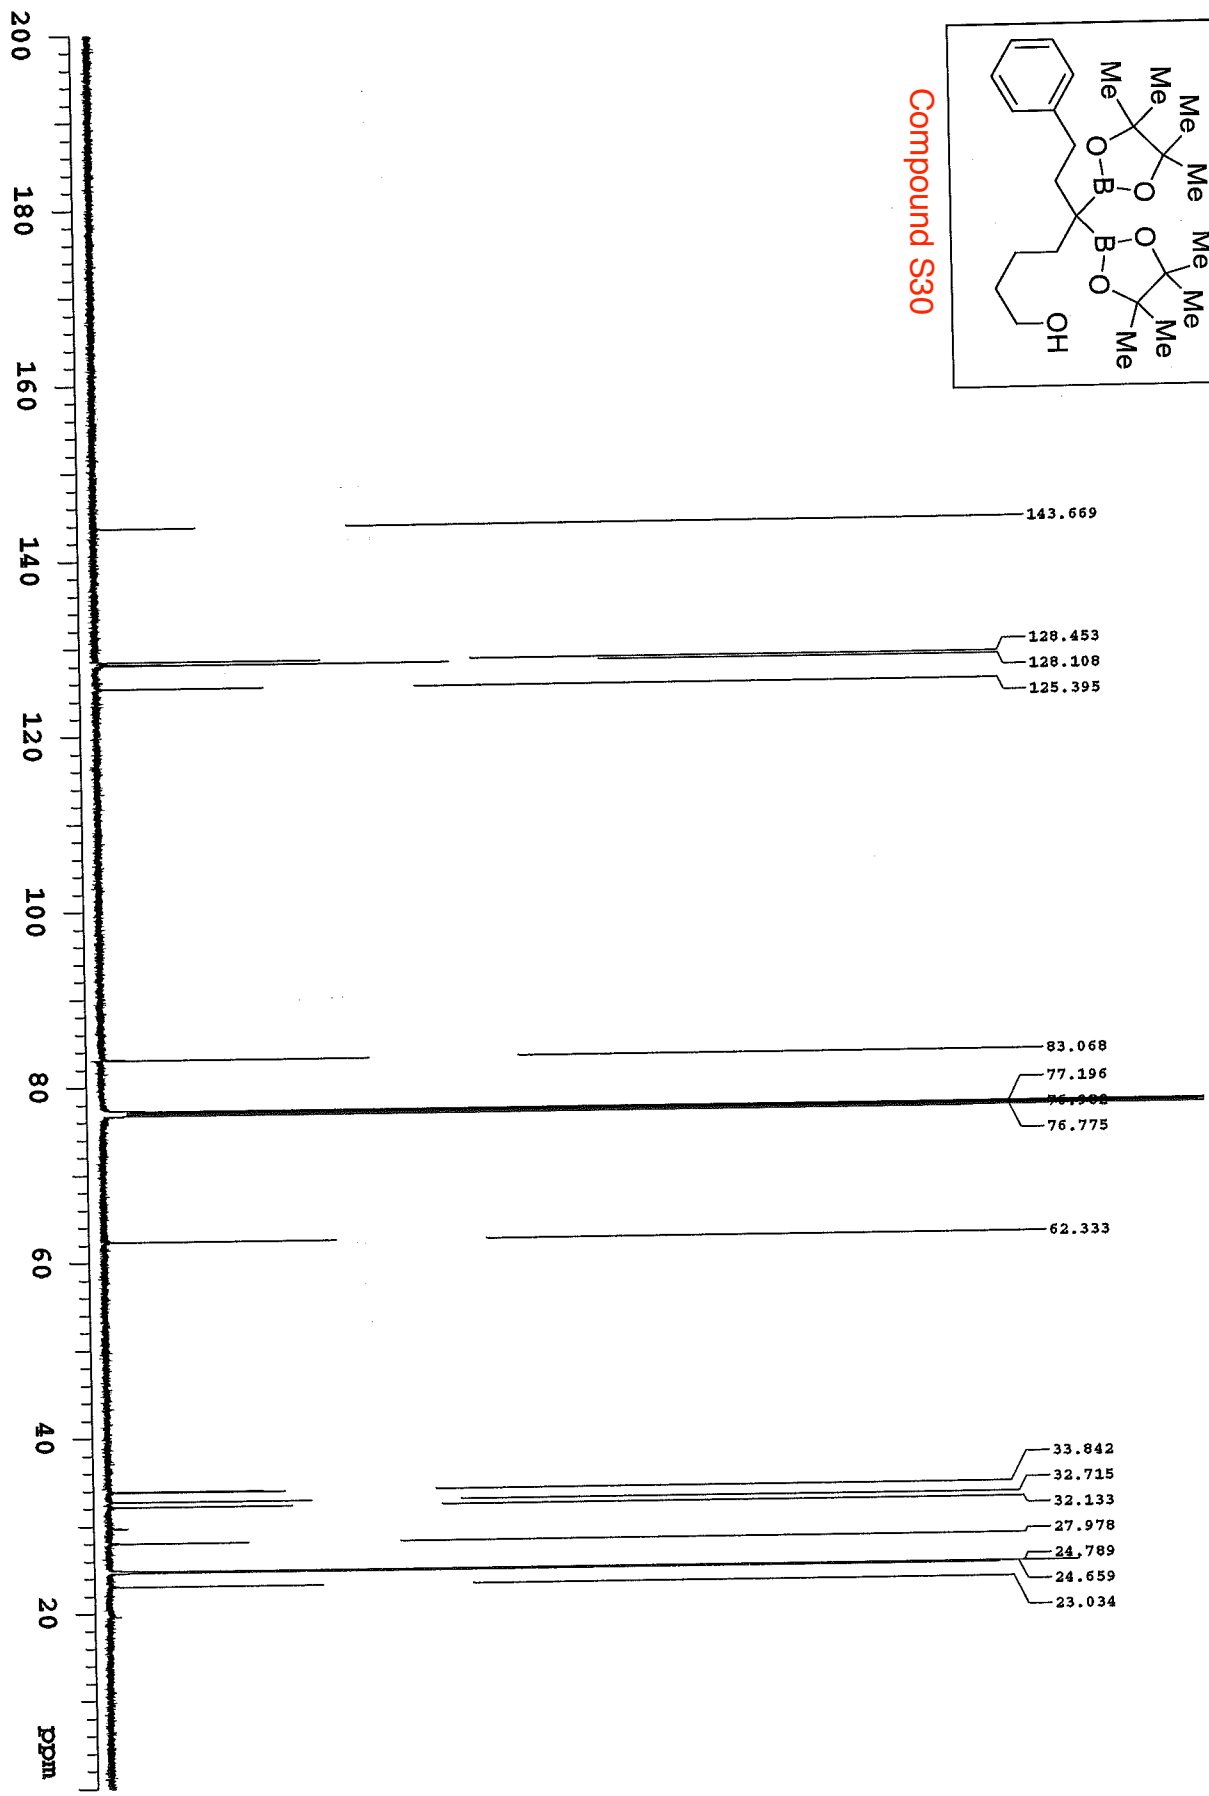

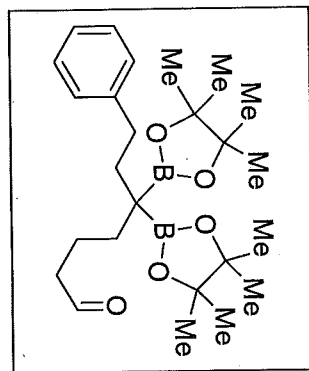

Compound S31

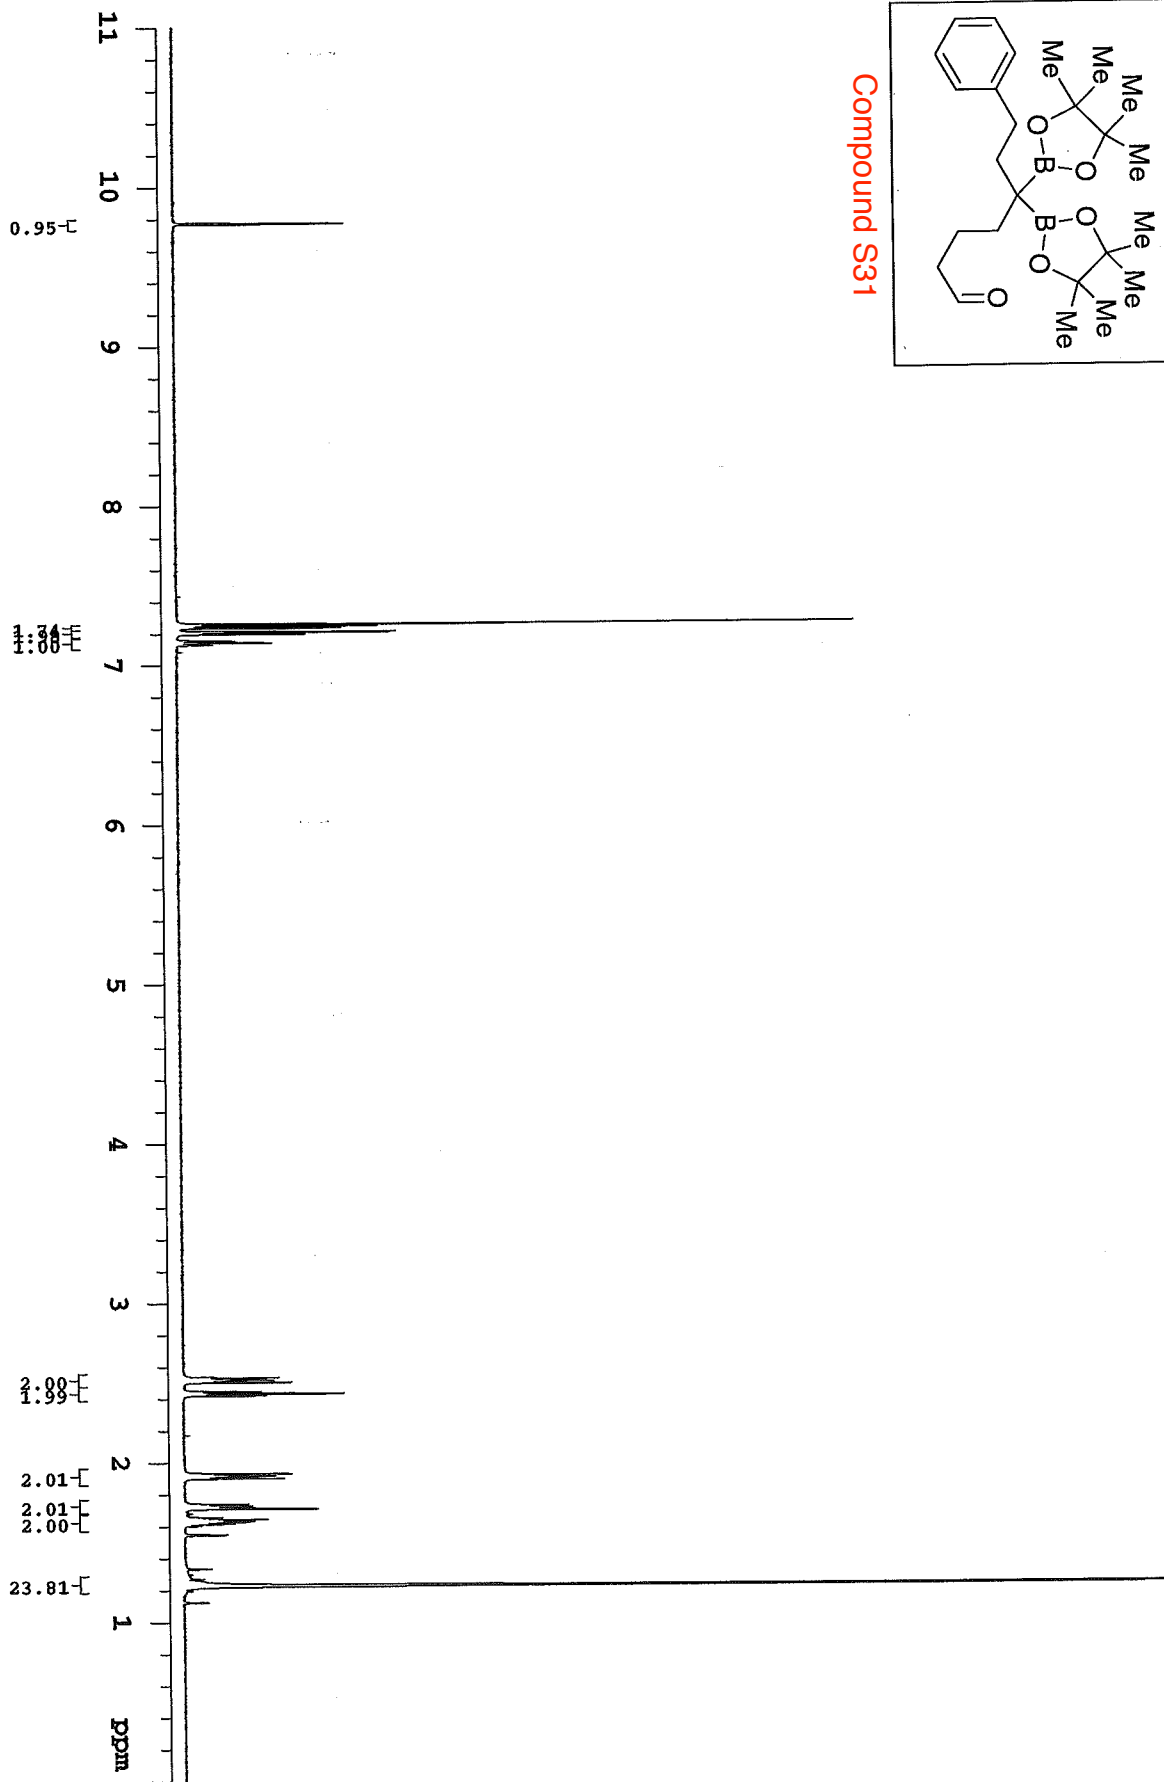

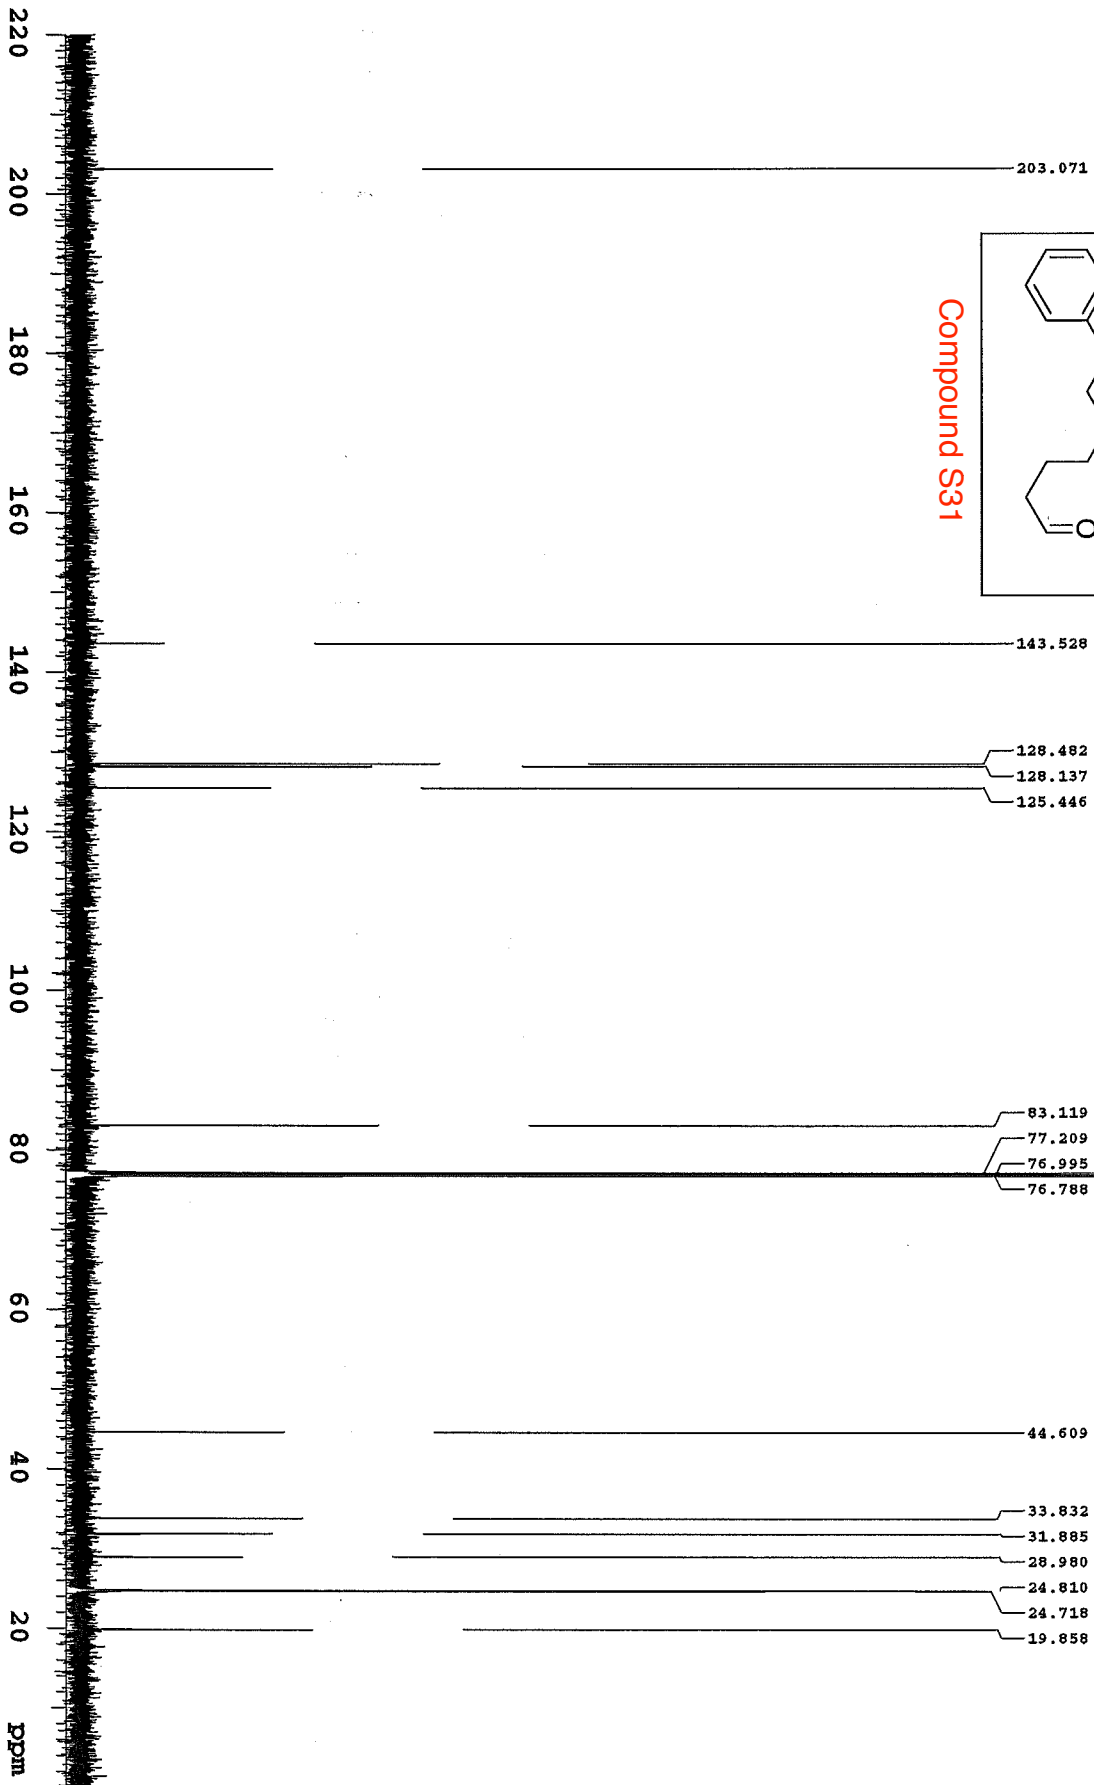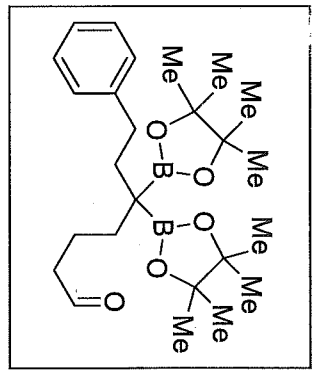

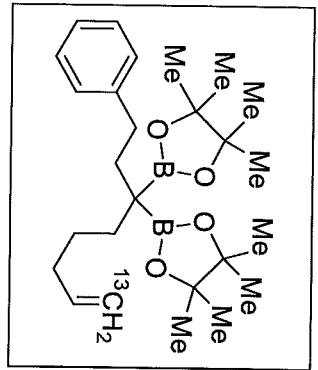

Compound 26

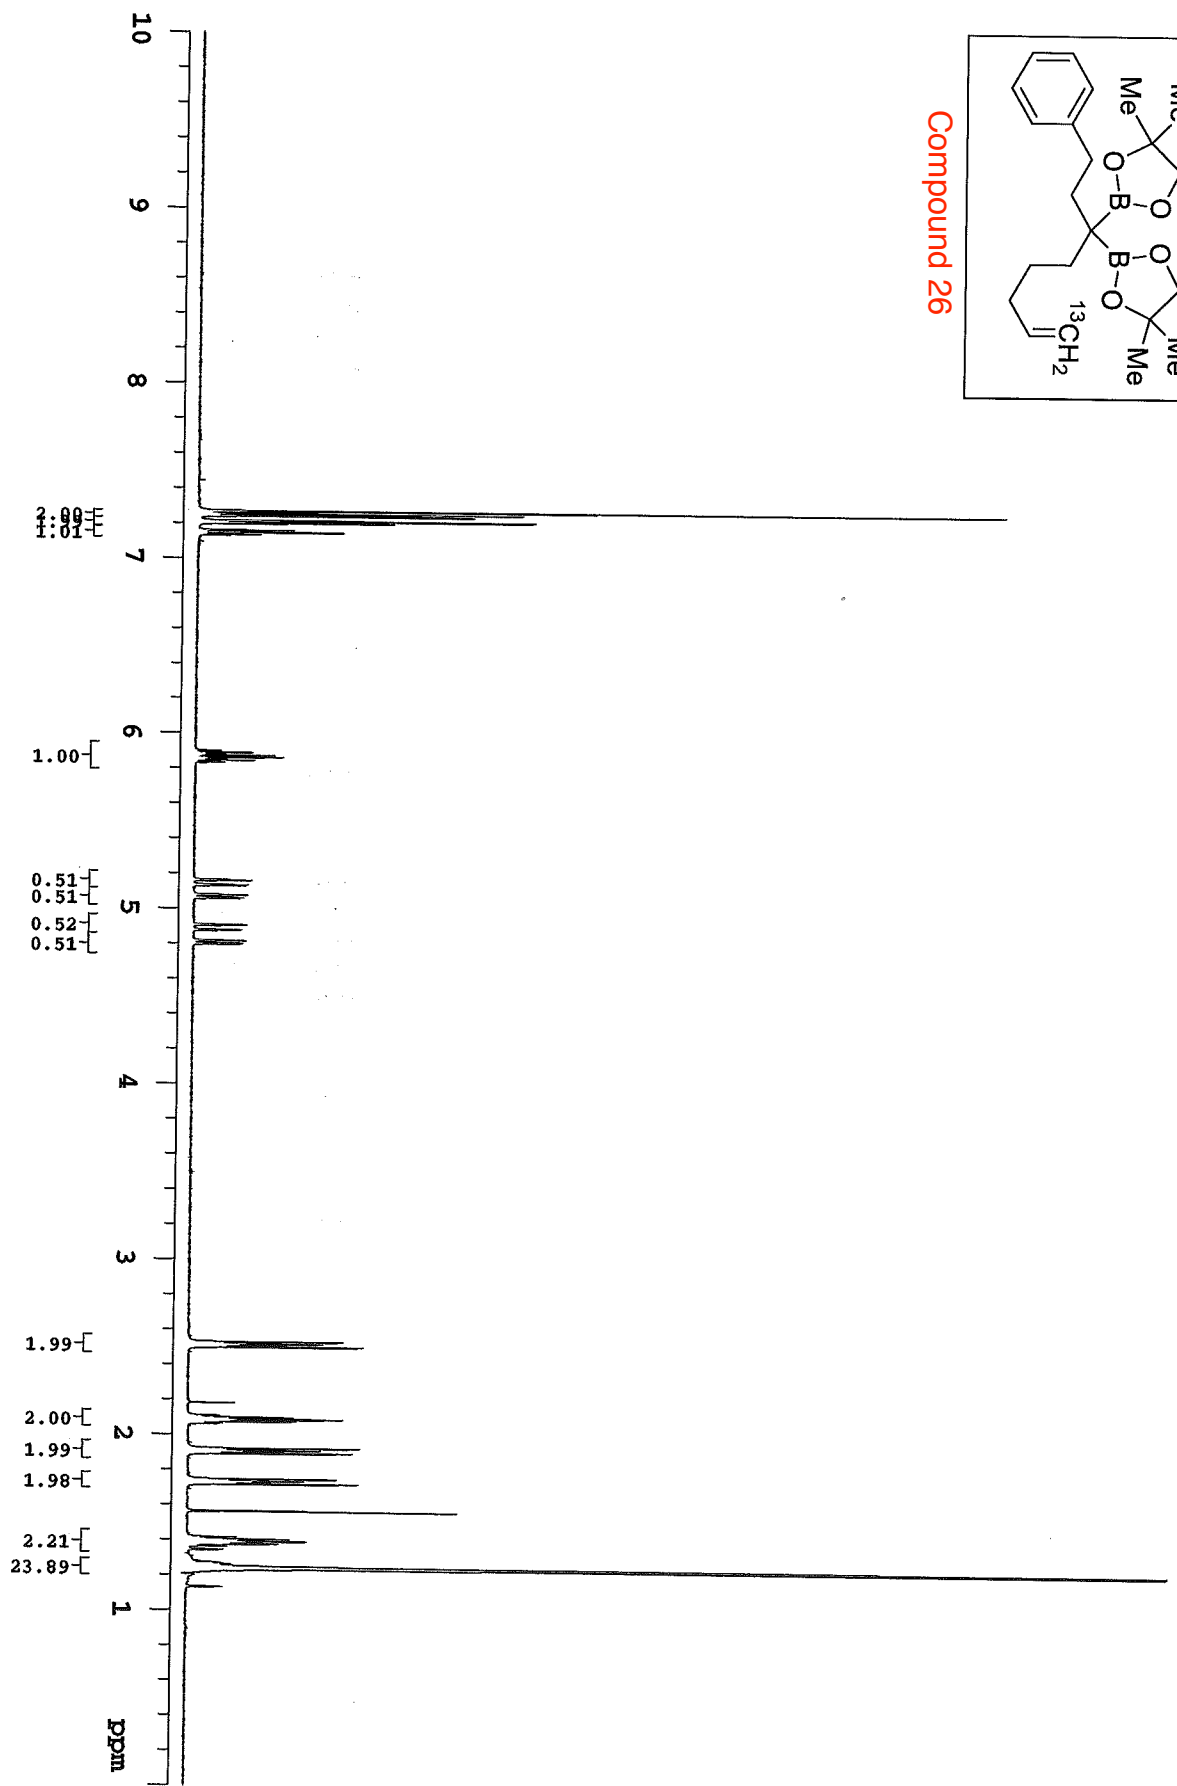

Compound 26

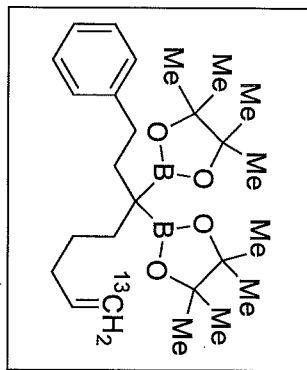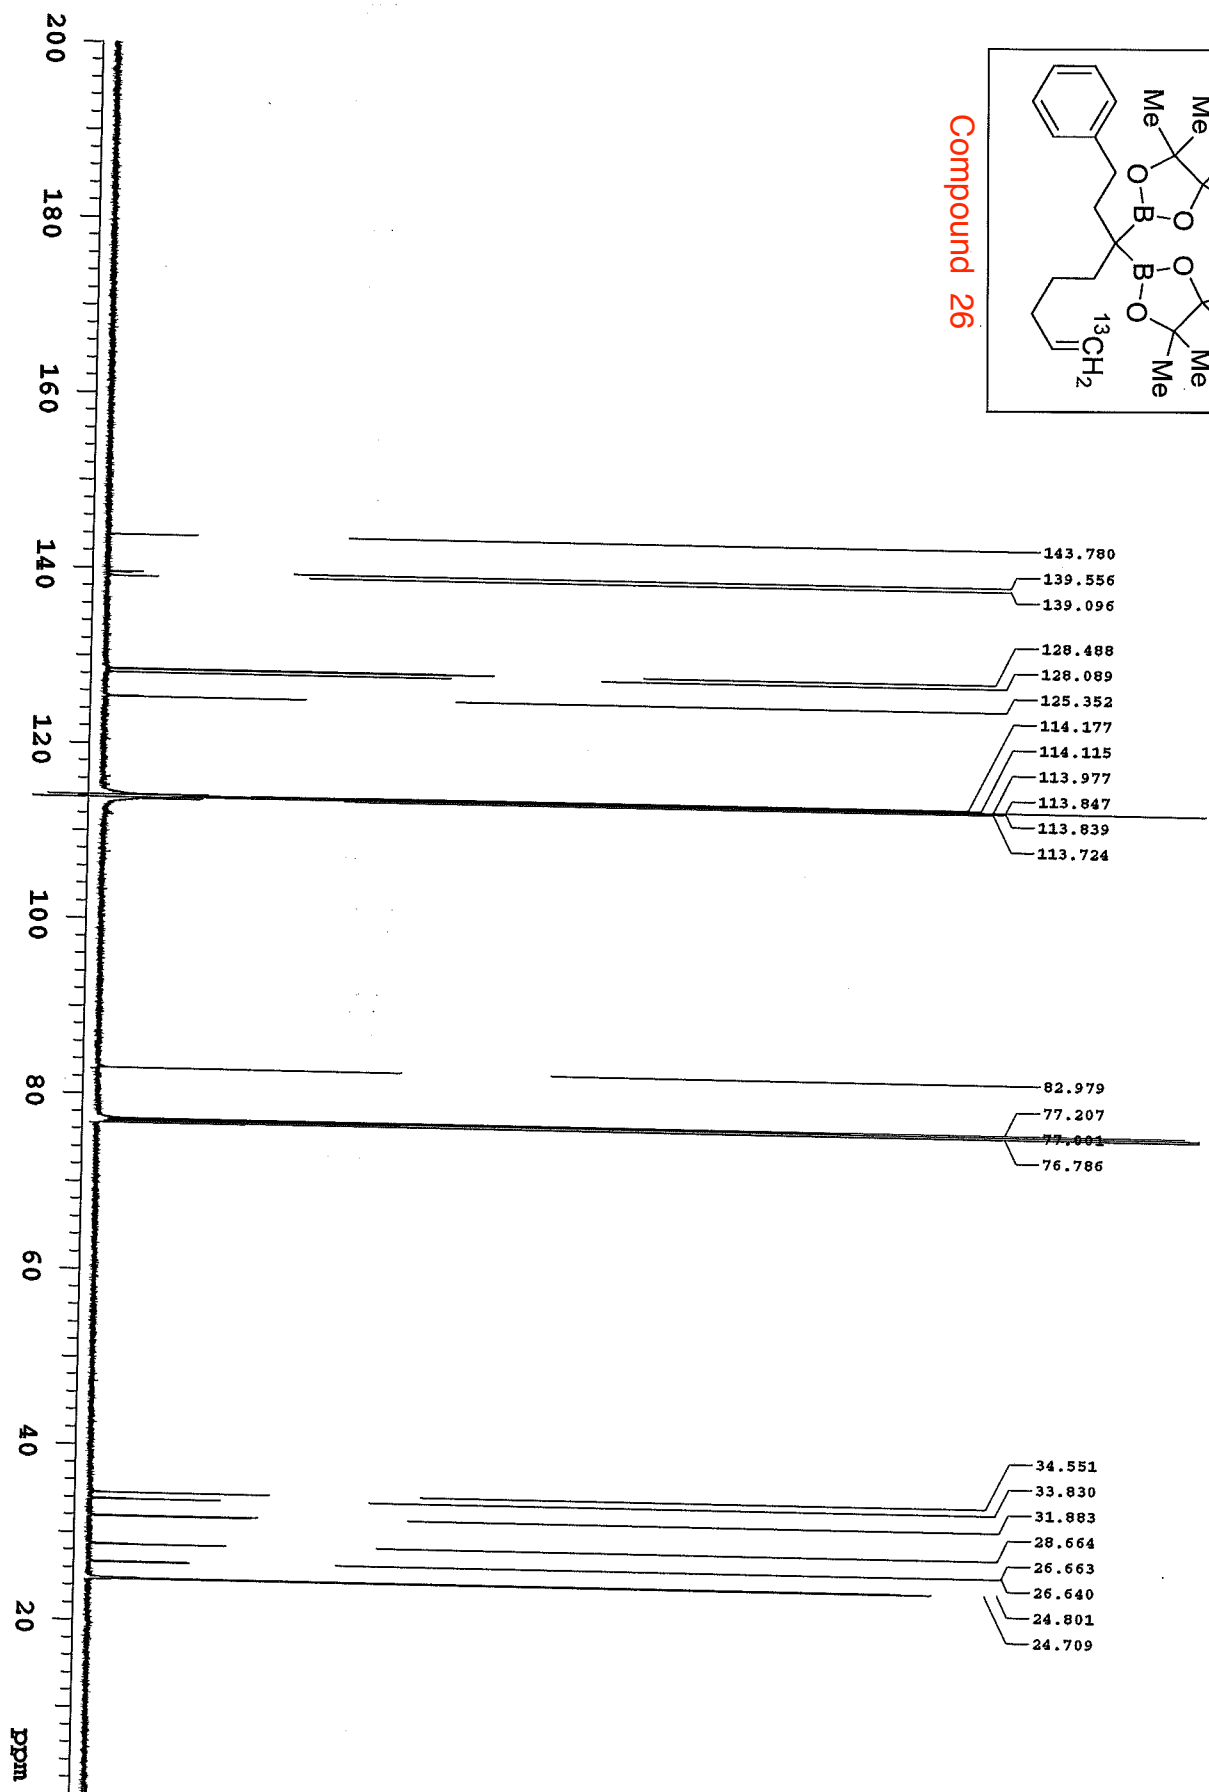

Supplement: NIHMS915264-supplement-Supporting_Information.pdf [file NIHMS915264-supplement-Supporting_Information.pdf]
